# Supplementary material for: Chromothripsis during telomere crisis is independent of NHEJ, and consistent with a replicative origin
Source: HighWire-hosted journal article supplement (doi:10.1101/gr.240705.118), 2019-03-14
Supplement: Supplemental_file_1.zip [file contig.2.DB37_length_267_mean_cov_24.2471910112.docx]

**DB37_length_267_mean_cov_24.2471910112**

AAGC|AACAAAGAAACCAAAAAAGAAACAAAAGAAAAA|AAAAA|AAAAAAAAAACAAGAAAGCAAGAAAGCACGAAAGCAAGCAAGCA
 >chr8:106206584-106206617 + E=2e-02 p=0e+00 >chrUn_gl000220:146355-146565 - E=6e
AGCAAGAAAGCAAGCAAGAAAGAAACGAAAGAAAGAAAGAAAGAAGAAAACGGGAAAGCAAGAAAGCACGAAAGCAAGCAAGCGAGCGA
-75
GAGAGAGAGAGAGAGAGAGAGAGAGGCTGGGCGCGGTGGCTCACGCCTGTCATCCCAGCA|GTGTGGGAGGGTGAGGAAGGCGGAGGAC

ATGA
