# Supplementary material for: Chromothripsis during telomere crisis is independent of NHEJ, and consistent with a replicative origin
Source: HighWire-hosted journal article supplement (doi:10.1101/gr.240705.118), 2019-03-14
Supplement: Supplemental_file_1.zip [file contig.2.DB37_length_289_mean_cov_2.07612456747.docx]

**DB37_length_289_mean_cov_2.07612456747**

GCTGCACTTGTAGTGTCAGGGTTATCAATATCCGTGGCTCTT|GACCCTGTTTTTCATACAGTGAGCACTCTTGAACCCAGAGAAGGTG
 >chr16:78675271-78675313 + E=6e-14 >chr16:78667938-78668185 + E=8e-135
CAGGTTGGAGATGCAGCTATATGACTCTGTACCAGAGAGAGACCTTTTTGTACATTTGGAATAAAAATTTTTAGCATTAGAGATTAGCT

TTTTTGTGTCTAAATACAAATGTCCAGGAGAATAGGAATGCCATAGTGGTGAGCTAAGAGCAGGCAGTTAGTTAAGTGTATGACAAGTA

TCTCATTATAAATGGATGCTGAA
