# Supplementary material for: Chromothripsis during telomere crisis is independent of NHEJ, and consistent with a replicative origin
Source: HighWire-hosted journal article supplement (doi:10.1101/gr.240705.118), 2019-03-14
Supplement: Supplemental_file_1.zip [file contig.2.DB37_length_315_mean_cov_17.0507936508.docx]

**DB37_length_315_mean_cov_17.0507936508**

GGGAGTCCTAGGATGCTTCTGGCTTCAATGCCGTTTGTCTCAATATGGGGAGGCTGCCCAACTTCAACAGCGTTACTGAAGGAGGATGG
 >chr15:91508509-91508760 - E=5e-131 p=0e+00
ACATAAACTGCACACATGTGAAGCGTAAGAGAAAAACCAGCGCCACAGTCCAGTTAACCAAGTCTCTCTACCCCAGCAGTTCTTCCCAC

CCCGTTCTCACGCCTCCTTCCCAGCCTCACCCTGCCGAGCAACCACTGATTTTTTTTTTTTTTTTTTTTTTT|T|GTTTTTTTTTTTTT
 >chrX:56328299
TTTTTGTTTTTGTG|TTGTTCAATTTTACTTCTACTTAATCTTCTCTCTTT-56328328 + E=5e-03
