# Supplementary material for: Chromothripsis during telomere crisis is independent of NHEJ, and consistent with a replicative origin
Source: HighWire-hosted journal article supplement (doi:10.1101/gr.240705.118), 2019-03-14
Supplement: Supplemental_file_1.zip [file contig.2.DB37_length_356_mean_cov_3.20786516854.docx]

**DB37_length_356_mean_cov_3.20786516854**

TTTGTATATATACCCAGAGATGGGATTGCTGGATCATATGGCAATTCTATGTTCAAATTTTGAAGAACCTCCATACTGTATTTTAGATG
 >chr18:67084800-67085050 + E=3e-139
GAAATAATTTTTATTTCCATCAACAGTGTGCAAACATTCTCTTTCCTTTGCATCCTCGCCAGCATTTATTATTTTCTGTCTTCTTAATA

GTAGCCATTCTAATTGGGGTGAGATAATATCTCATTGTGGTTTCTATTTGCATTTCCCAAATGATTAG|TGAT|CATTATACATTGCAT
 >chr18:67084147-67
TATTGTATCAAAATATTACATGTATTCCATAAATATGGACAACTATTATGTATCCATAAACATAAAAAAATTTAAAAATTAAAAATAGC
084257 - E=9e-55
AT
