# Supplementary material for: Chromothripsis during telomere crisis is independent of NHEJ, and consistent with a replicative origin
Source: HighWire-hosted journal article supplement (doi:10.1101/gr.240705.118), 2019-03-14
Supplement: Supplemental_file_1.zip [file contig.2.DB37_length_370_mean_cov_6.83243243243.docx]

**DB37_length_370_mean_cov_6.83243243243**

CTCATTATAAAGGGATGCTGAAATGTCCAAGTGTGGAAATGATACGCTTCAGCTCTTATTTTTAAGTCATCCTTATCTCTTTCACTTAT
 >chr16:78668163-78668257 + E=4e-42 p=2e-02
TCCCT|AAAAAAAAAAAA|AAAAATGCTGTTTGACTGGGAGAGCAAGTGGAGCTGTTCAAAGTTCTAGGGACAGCCGGGCGCAGTGGCT
 >chr16:78668269-78668458 + E=2e-96
CATGCCTGTAATCCCAGCACTTTGGGAGGGCGAGGCGGGCAGATCACGAGGTCAGGAGTTCGAGACCAGCCTGGCCAACATGGTGAAAC

CCCGTCTCTACTAAAAATACAAAAATTAGC|CGGATGTGGTGGTATGCACCTGTAGTCCCAGCTACTCGGGAGGCTGAGGCCTGAGAAT

CACTTGAACCCAGGAGG
