# Supplementary material for: Chromothripsis during telomere crisis is independent of NHEJ, and consistent with a replicative origin
Source: HighWire-hosted journal article supplement (doi:10.1101/gr.240705.118), 2019-03-14
Supplement: Supplemental_file_1.zip [file contig.2.DB37_length_378_mean_cov_4.36507936508.docx]

**DB37_length_378_mean_cov_4.36507936508**

GGAAGTTCATACAAGCTCTCTCATTTAATTATCTCTCCAATCCTGAGGGGTATTAAAAACTCTTATTATATAGTTGAAGTTATTGAGAG
 >chr9:22530998-22531151 + E=1e-80
AAGGTCTTGCATTTAGTAAGTCACCAAGTAGTCATTGAACCTTGGTTCTCTTTTATTCTAAA|GT|GTGCTGCACCCATTAACTCGTCA
 >chr9:22531650-22531871
TTTACATTAGGTATATCTCCTAATGCTATCCCTCCCTCCTCCCCCACCCCACAACAGGCCCTGGTGTGTGATGTTCCCCTTCCTGTGTC
+ E=1e-103
CAAGTGTTCTCATTGTTCAATTCCCACCTGTGAGTGAGAACATGCGGTGTTTGGTTTTTTGTCCTTGCGCTAGTATTGCTGTTATGACG

ATTCATGCACATGTATGT|ATATGC
