# Supplementary material for: Chromothripsis during telomere crisis is independent of NHEJ, and consistent with a replicative origin
Source: HighWire-hosted journal article supplement (doi:10.1101/gr.240705.118), 2019-03-14
Supplement: Supplemental_file_1.zip [file contig.2.DB37_length_408_mean_cov_5.61029411765.docx]

**DB37_length_408_mean_cov_5.61029411765**

TTTTAGAAAA|TAATAAAAAAAAAAATACAAAAAACTAAGATTGTAAAATTAAAAAA|AAA|AAAGAAAGCCAACTTTGTTTGAATTTA
 >chr5:56720732-56720778 + E=4e-07 >chr5:56721932-56722283 +
AAGTGGACCAGAGGGACAAATGGTGTGAAAAGCAGTGTGACTGATGATATCTAGTAGGTAGCAGATGCTGATGGAGGGAGGGAGGGTAG
E=4e-194
ACTGCATAGACAGGAAGGGCCTCAGTATAAGGTAAAAATGATTCATCATTAATAACGACTAATTTTTTTTAAGCATAGGTGTTGTGGTG

AAGGGACAAGTACAGGAGAAAGTATACAGTTATTTAATTATCTTTCCTAAATGTTGAAAACACACATGTAGCCTTTATAAGATATAGTA

TTTTGTGAATTAGATGAAGAGTTTGTGCATGGATACTGTGGTGCCTACTAGGGCA
