# Supplementary material for: Chromothripsis during telomere crisis is independent of NHEJ, and consistent with a replicative origin
Source: HighWire-hosted journal article supplement (doi:10.1101/gr.240705.118), 2019-03-14
Supplement: Supplemental_file_1.zip [file contig.2.DB37_length_422_mean_cov_4.89099526066.docx]

**DB37_length_422_mean_cov_4.89099526066**

GGTCCACTTTAAATTCAAACAAAGTTGGCTTTCTTT|TTT|TTTTTCAATTTTACAACCTTAGTTTTTTGTATTTTTTTTATTATTACA
 >chr5:56721932-56721968 - E=4e-10 p=6e-03 >chr5:56720395-56720778 - E=1e-219
TTCAAAAAAACAAACAATAAGATGAGGACAGGGTTGGGGCATATAAAACAGGTCCCTAAATAGATGACAGACCTGCATACAGTTACCAT

AGAAGTATACAGTACCCCTCTCCCCTCAGTTAGGCTATGTATTTGTCTTTTCCACTGTTGTTCAGTAAGTTCCAATGGTTCTACCTTGA

AATAGGTAACAGTCTTTGGAAAAAGTCATTCTAGGTTGTACAAAGGCTCTATATATACAGTTTGTCACAAGAAACAAAGCTTCTTTCCA

AAATTTAAAAAAATTAGTGTGTATTTGTTTTGGTATTTTTTTTATTTTTCAATTTTTTGCAAAGCAAT
