# Supplementary material for: Chromothripsis during telomere crisis is independent of NHEJ, and consistent with a replicative origin
Source: HighWire-hosted journal article supplement (doi:10.1101/gr.240705.118), 2019-03-14
Supplement: Supplemental_file_1.zip [file contig.2.DB37_length_430_mean_cov_7.32558139535.docx]

**DB37_length_430_mean_cov_7.32558139535**

TGCCTAAGTTTTGAAGTTTGAATCTCAAATTCTTAAAATTCATTGCATCCTTTGTCCCTGACTTCATCATCTTTACTCAGCCATTTCCT
 >chrX:10502959-10503200 + E=1e-133
CAACCTTTAGTAGGACCGACACTGCCTTTGTCTATTCAAGATGATTTCGACTGAGTTGAAAGAAATGTGGAAATCATGGAAGGAAAGAA

GATGAGGAGTGTCTACTAGGGGAGTAGTTCCCATTCTGGCCTACACATGGCAATCACCTGGA|T|TTGGTATCTAGTTAGTCTAGCATT
 >chrX:10554631-10554821
CATTAGCTAATGATGTCCTTTGGTATTTATTAAAGTCACCACAGCATGGGGGGACTTTATGTTTAGGTTTTGCCTAAGAGTTAGCTTAT
+ E=7e-103
CTGCTTCTTGTGCTAACAGGGCTGTTGCTGCTAGGGCCCTTAGACATGCAGGCCAGCCTTTGGAAACCCCGTCTAG
