# Supplementary material for: Chromothripsis during telomere crisis is independent of NHEJ, and consistent with a replicative origin
Source: HighWire-hosted journal article supplement (doi:10.1101/gr.240705.118), 2019-03-14
Supplement: Supplemental_file_1.zip [file contig.2.DB37_length_433_mean_cov_5.88914549654.docx]

**DB37_length_433_mean_cov_5.88914549654**

GTGTTTCACTCATTTTTAAAATTGACTTTTTGACTTCTTCCTGTAGAGTTTAGAGAGTTCTTTCTGCAGCTGGATATAAGTCCTTTGTT
 >chr15:66511639-66511738 - E=5e-48
GGCTATGTGA|CTGTAT|GCAGAACTGAGGATGCTCTGTTGGATGGCTCTTGTCACTCTACAGGAATGCATGAAAGAGAGCCACGATCT
 >chr15:66584037-66584365 - E=4e-186
CCCACTCATTGTACTTCCATGTCAAGTTACCCTGCAGTGTGAGCTGATGTGAATGAGATCTGAGGTGGAATTGCACGAATTAGGAAAAC

AGCACAGAGCTGGCCTGTAAGGCAACCAGCAGTGCAGGAGGCTGTCCCTAATTCAGGAGGTCAGTTCTGGACAGCCCAGAGGACAGTCA

AGTTGCCAGATTTGTCCCCTACATAAATATGTTCCAGGCAGCTGACCACAGTTCCCTTCAAAGCTCCCTCACGTTCATT
