# Supplementary material for: Chromothripsis during telomere crisis is independent of NHEJ, and consistent with a replicative origin
Source: HighWire-hosted journal article supplement (doi:10.1101/gr.240705.118), 2019-03-14
Supplement: Supplemental_file_1.zip [file contig.2.DB37_length_444_mean_cov_7.34234234234.docx]

**DB37_length_444_mean_cov_7.34234234234**

GAAATAAAGACAGATCATGTACAAAGAATAGTCATTAGACTGAAGACCTACTCCTCAACAGCAACAATAGACACCTGAAGCCAAAACCT
 >chr9:73463498-73463612 + E=5e-57 p=0e+00
TCCATGTGTC|AAAAGAAATTACCTG|TCAGTCTAGAATTCTACATTCAGCAAAACTATCTTTTAAAAATGAGAGCAGATTATAGATAT
 >chr9:73463913-73464255 + E=6e-168
TTTCATACTGCCAAAACTGACAGAGTTTACTTCTAGGCACCTTCACTGAAGGAAGTTGTTTTTGTTATTGTTTTTGTTTGTTTGTTTTG

AGATAGAGTCTTGCACTGTTGCCTGGGCTGGAACACAATGGCATGATCTCGGCTTACTGCAACCTTTGCCTCCTGGGTTCAAGCGATTC

TCCTGCCTCAGCCTCCCAAGTAGCTGGGACTACAGGCGCCCGCCACCACGCCCGGCTAATTTTTTTTTTGTATTTTTAGTAGAGACGGG

G
