# Supplementary material for: Chromothripsis during telomere crisis is independent of NHEJ, and consistent with a replicative origin
Source: HighWire-hosted journal article supplement (doi:10.1101/gr.240705.118), 2019-03-14
Supplement: Supplemental_file_1.zip [file contig.2.DB37_length_449_mean_cov_6.01336302895.docx]

**DB37_length_449_mean_cov_6.01336302895**

CATAGCAAGAACTTTCTTATGACATAATGCAAAATAAAGAACTAAAGACATTCTACTCTTTGTTCCATTCTAGTGTTATAACCTAAATT
 >chr1:193063720-193063886 + E=2e-88
ATCACATGGGAATGAAATTCTTGTCTAAATTCTTGATCAAGAGGTTTCCTAATGGCAGTTTAAATCCAAGTAAGA|AG|AGAAGATTAA
 >chr1:19320
ATACTGATTTGCATAAAATTGCCAAATAAAATCTTTACAAATTTAGAATAAGTTTAAGCTGATATCTGGATATATTTTAGATATGTTAT
8593-193208878 + E=4e-160
ACTTGACGTGGCTATATTTATTTGTTGGTTGACATTTAAAATTTTTTTTTGTTGATACATAATATTTGTACATATTTATGGTGTACATG

TGATATTTTGTTACATGGATAGAATGTGTAATGATCAAGTCAGTATTTAGGGTATGTATCACCTTGAGTGTTTATTATTTCTGTGTTTT

GGGAAC
