# Supplementary material for: Chromothripsis during telomere crisis is independent of NHEJ, and consistent with a replicative origin
Source: HighWire-hosted journal article supplement (doi:10.1101/gr.240705.118), 2019-03-14
Supplement: Supplemental_file_1.zip [file contig.2.DB37_length_560_mean_cov_3.41964285714.docx]

**DB37_length_560_mean_cov_3.41964285714**

CTTGATGCTCTAAGTTCTTGATGCCTGTGTGATTTCTTATTTTGATGACATTTTCCAATGCCACGTGATATTTTTGAAATGAAAAAATT
 >chr18:75012321-75012769 + E=3e-258
TGTACATTTTGATCAACTTGCCAGCAAACACCCCTTGAGAGCCCTCCAGCTCCAGGAGCTTAGACGTCGTGACTCCGGCACCCACCGGA

TGCTCCACTCACTTTGTTTTGGCCTTCACACAACAAACCTGACTTTAATACAAACCCAACTGAAAAGCACTGGACGTTGCAAGACTTCA

AAGGCCACTCATCAGCACCTTTCCCAAGCTCCTGCTTGCCACCTGCACATGACAGATGTGACAGCTTAGACGAAACCCATGAGGTTTTT

CTCCCCAGCCTTTGGTGCGGAGCTCCCATCTGGAGCCGTGTTTCATCTGGCACTGCGGGGCATGAGAACTAACAGCTGGTTAATGGCC|

TGGC|ACTACTACTGTTTTTGAGATCATTTAATCAGTAAAAGAGAAGGGTGCCATAGCAAAATGCCTTATGTTGGCATCTGCATGAAAT
>chr18:75014004-75014120 - E=4e-58
CTCTTCTTACAACAGTGCCTAGTTTTCT
