# Supplementary material for: Chromothripsis during telomere crisis is independent of NHEJ, and consistent with a replicative origin
Source: HighWire-hosted journal article supplement (doi:10.1101/gr.240705.118), 2019-03-14
Supplement: Supplemental_file_1.zip [file contig.2.DB37_length_661_mean_cov_7.65809379728.docx]

**DB37_length_661_mean_cov_7.65809379728**

CTCGGCCCCAGCGCACGCCGTGTTCAGCGCAGTCTCGCCCTGGCTGGTGCGCAGGCCCACGTCGGCGCCATGCTCCAGGTACAGAGCCA
 >chr17:42253887-42254301 - E=2e-237 p=1e-02
CATGTTGCTCCAGGCCGCGCGCCGCCGCCACGTGCAGGGGCGTCTCCTGGCTCTCGCCTGCTGCCAGGTTCACCGTCGCTCCTGCTTCC

AGCAGCAACTTGGCGCACCTGGGGACAAGAGAGCAAGGTCCTGAGGAAAATCCTGAAGGCTTGGGACCCCTTCAGCTTGCTGTGACACT

CCCTTGCCTTTCCACCCCTCTCAGCTTGAGGTCCTACCTGGTGTCCTCCATGAGAATCATACAAGCCCCGCTACAGACAACAGAATTGG

AAGGTCCTGAGAGCTACCAGAAGCATCTTCAGTTTTCATATGAAAAACTTAAGCCCAG|CCGAGACTGTGT|GAGGCCGAGACTGTGAG
 >chr17:42155718-
CGCCATGGCCTTGCTGTCGGTGGGGGCCGAGCAGGCCCAGGCTGCGGCAGCCCGGGAACACAGCCCCAGGTAAGCAGCAACCCGCACCA
42155953 - E=1e-129
CCTCTCTGCCCTCACCCCTGCTGGTGCGCCCCACTCAATACCCTCCCCTGTGCTTGCCCCACAGGCCGGCAGAGGAGCCCATGGAGCAG

GAGCCTGCCCTGTGACGCCCCGGCCCCCATCCCTCTGGGC
