# Supplementary material for: Chromothripsis during telomere crisis is independent of NHEJ, and consistent with a replicative origin
Source: HighWire-hosted journal article supplement (doi:10.1101/gr.240705.118), 2019-03-14
Supplement: Supplemental_file_1.zip [file contig.2.DB37_length_662_mean_cov_5.21148036254.docx]

**DB37_length_662_mean_cov_5.21148036254**

CCTTCTGAACAGTCATATTTGTCTCTAACTTAAACCTACTATATATC|TATATATATATATATATATATATATATATATATATATATAA
 >chr9:107707069-107707302 + E=2e-128 p=5
AATGTATTATTGTTTTGATTTATATTTTCTTTGATTAAACTGAAAAATAATATGGATTAAATAAAAATAAAGATTAAACATCTTTTCAT
e-02
GTTTATCGGTGTTTAAAATCCAATGTTTATTCTTTCCTTATTTATCTGTTAAAAGCTCTTGTTAAACCAAGTGTTTCAACTTTCTGACT

GTTACATGTGTT|GC|TACTTGGGAGGTTGAGGCATGAGAATTACTTGAACCTGGGAATCAGAGGTTGCACTGAGCCAAGATTGTGCCA
 >chr9:107712345-107712729 + E=2e-216
CTGCACTCCAGCCCAGGTGATGGAGCGAGACTCTGTCTCAAAAAACAAACAAACAAACAAACAAAACATTGTCTTTCTTTATATCCTTA

TTCTATGAGCTTTTTTCTATTAAAAAAATTGTTTTAACTGATTAAACTTTGTTGTTAAAAACTAATATGTTAAAAACACACATATTAGC

CTAGGCCTACACAGGGTCAGGATCATCACTATCATAGACTTCCACCTCACATCTTGTCCCACTGGAAGGTCTTCAAGGGCAGTAACATG

CATGGAGCTTTCATCTCCTATGATAACAATGCCTTTCTTCTG
