# Supplementary material for: Chromothripsis during telomere crisis is independent of NHEJ, and consistent with a replicative origin
Source: HighWire-hosted journal article supplement (doi:10.1101/gr.240705.118), 2019-03-14
Supplement: Supplemental_file_1.zip [file contig.2.DB37_length_673_mean_cov_7.07875185736.docx]

**DB37_length_673_mean_cov_7.07875185736**

TGTTTGTTTTTTTTTTTTTTCTTT|GCATGGTAGTGCATACCTGTTGTCCCAACTACTCAGATGGCTGAGGCAGGAGGATCAATTGAGC
 >chr16:78765747-78765902 - E=2e-81
CCAGAGTTCAAGGCTGCAAAGAGCTGTGAAGGCACCACTGCACTCCAGCTTGGGCTATAAAGCAAGACCCTGTCTCTCAAAAAAAAAAA

AA|GAGTTCATCT|CTGTGTCAGAGATGAACAGAATACCCTGGTAATATCCCAATCTCACCAAGGCTGATCTGACAGAGCCCGATTACT
 >chr16:78742912-78743396 - E=1e-276
TGCAACAGGCTGGGCCCGCTGCCCAGGCCCTGTGAACCGGAATGGCCGAGAATCGCGGGCTTTCCTTCAGCCAGACAACTCCAACAAGC

TTCTCTCTGTGATCACTACGTAAGTTAAATGAGTTAATCTTGTTTTCCAGATGAACTGTTATTTTGTCTCCCGCAGGCAGAGATTACGG

GATAAAAGCATTGTGTTAACAGGAGGGCTGGGGGCTTTCCAGAGCCACATTCCACACACACAGAACCCCTCTCTCCAGTTCTTCCTCCC

ATTTCTATTTTTTCATGGATTTAGAGAACGAGGAGGAGAGTAGGGAACTTCAAAATGACACGCAGGGCGATAAACCTTTCAGATGAATG

ATGTCACTTCATAAGGGGTCAGGGGGCCAATTTATTTTCACGTTTCGAAACAT
