# Supplementary material for: Chromothripsis during telomere crisis is independent of NHEJ, and consistent with a replicative origin
Source: HighWire-hosted journal article supplement (doi:10.1101/gr.240705.118), 2019-03-14
Supplement: Supplemental_file_1.zip [file contig.2.DB37_length_695_mean_cov_31.9884892086.docx]

**DB37_length_695_mean_cov_31.9884892086**

ATATTAGTGATAC|CTACGTCCGCTCGTTAATCTACACACATACATACGACGCTTTTCATACGTAAAATAAACGTCTTTATCGACGATC
 >chrUn_gl000220:103119-103742 - E=0e+00 p=0e+00
CCTTCTTTATAGAGCGATGTGTATTTATTTGTATAACACAGACACCTACATCTATCATACAGAAGTCTATTTCCATACAACCGATACGT

ATTTACCATACGCAAGAGTATTCAATGCAGAGATACACGTTGTCGTTGTTTGCATATAAGCGTACAGAAACGTTTACATTAATACATAT

AAGTAAACGCGTGGAAACGAAAGAAATAAAAAAGCGAAATGAGTCAACAGGCCGGGCACGGTGGCTCACGCCCGTCATCCCAGCACTTC

GAGAGGCCGAGGTGGGCGCATCACAGGAGGTCGGGAGTTGGAGACCAGCCTGAGCAACATGGAGAGACACGGCGTGCCTACTAAAAACA

CAAACATCAGCCAAGCCAGGCGTGGGGGTGCCTCCCTGTAATCCCCGCTAATCGGGAGGCTGAGGCAGGAGAAGCGCTCGAACCCGGGA

GGCGGAAGGTGCGGTGAGCCAAGACCGCGCCATTGCACTCTAGCCGTGGAAACAAGAGTGAAACTCTGTCTCAAAAGGACGAAACAGAA

AGAAAGAAAGA|AAG|GAAGGAAGGAAGGAAGGAAGGAAGGAAGAAAGAAAGAAAAGAAAGAAGGAA|TGAATGAA >chr8:134982856-134982910 + E=1e-14
