# Supplementary material for: Chromothripsis during telomere crisis is independent of NHEJ, and consistent with a replicative origin
Source: HighWire-hosted journal article supplement (doi:10.1101/gr.240705.118), 2019-03-14
Supplement: Supplemental_file_1.zip [file contig.2.DB37_length_706_mean_cov_7.22379603399.docx]

**DB37_length_706_mean_cov_7.22379603399**

TCAGATTTAGATGTTTTTCCAATGGCCAGGCTCACAAAATAATCCAGACACCAAACTTGTAAGCTGGCTAAAAGCGGCAAGGAATGATT
 >chr6:45705650-45706008 + E=1e-200
CTTGGCTTATCTCCCACTGGATTTTACTTACTGGGCTATTCAAGTGGATTATTTCATTCAAGGTAGAAAGCCCTCCACACGGAGGGCTG

GACAAATTCCCAGCACACCCAAGCTATTAGAAGGCCTTTCAGGGATGACAAGAATATGTTAGCTTCATTTCTTCTCTCTCACAAGAGAC

TCTTCCCTCCCACGAAAAGACTGAAACAATAGATTTACCCAAAGATGGCCGCTCTGAGGGCCTGCCCTTGATGAGGTTAAAGGAAGTGG

CT|TACTTGCCAGGGTCTAGGAGTTGTTTTGGGTCATCTCTAAAAGTCCTCTAGGGATCTAAAATCTATTTGTAATCTGGATACAAAAC
 >chr6:45457904-45458254 + E=8e-199
AGTAATGGTGGGGAAAACAACCATTAACAATGAATTTCTCTAATTTTTCCTGTTCATTTTTCTCCTAGGTCTAGTCCTTCTGTTATAGC

AGATGCCCAAAAACTTGCACTGGCAGGAAATAGGGTGGTGGGTGCATTTCAGTTAATGGGCCTAGTTGGAACACGTTTGGCCGTGGAGA

CAGCTACACTCATATTACCAAGCCTTGGCTTCCTATCTGTTTTCTTTGGGCTGGGAAGGCAATGAAAAAGGAGACAGGAAAATA
