# Supplementary material for: Chromothripsis during telomere crisis is independent of NHEJ, and consistent with a replicative origin
Source: HighWire-hosted journal article supplement (doi:10.1101/gr.240705.118), 2019-03-14
Supplement: Supplemental_file_1.zip [file contig.2.DB37_length_720_mean_cov_6.72638888889.docx]

**DB37_length_720_mean_cov_6.72638888889**

GATCTCTGCACTCTGGGCTTTCTCTAGCTTCCCCAGGGAAGGGAGGCTCGGGGTGAGGTGGGCACGGGGCATCTTTCCTGCCCAACTGT
 >chr17:40672892-40673217 + E=1e-183
GAAGTCCTAAAAAGCTTCACAAAGTTTCTATTGAATGACAGCTTTCTTCTTCTCTTTCTCCAGGGTTGAGTTCCAGAATAAATTCTACA

GCGGGACCGGTTTCAAGTTCTTACCCTTCTCCTTCGAGCATATTCGGGAAGGGAAGTTTGAAGAGTGAGTCCCTGTGAGGGCCGTGTGC

CCCATGCTACCCTCCCCGCCTCCCTCCACAGTGATCAGCTGTGCCTCTCTGCCTGTTG|TA|CTCCTGAGTAGCTGGGACTACAGGCGC
 >chr17:40678890-40679283 +
CCGCCACCATGCCTGGCTAATTTTTTGTATTTTTAGTAGAGACGGGGTTTCACCGTGTTAGCCAGGATGGTCTCAATCTCCTGACCTCG
 E=1e-224
TGATCCGCCCGCCTTGGCCTCCCAAAGTGCTGGGATTGCAGGCATGAGCCACCGCGCCCGGCTGCTCCTGTTTTTAAGAGATGTGCCTT

TACCCTGATCCCCCTCTTGTGGAACCCCAGGACCCCAGACATCTGTCTGATGAGTCTGTGCCCTGGTCCAGGAAATGCCCCTCATCTTG

AGGTCCTAGAACCAGTGTGGGAGAGGGTGGCCTTGGCATGCTTGGCCTGGGGAGTCCCAAGCTTTGTAGAGATAGGGGACAAGTCTATC

ACCACCTTCA
