# Supplementary material for: Chromothripsis during telomere crisis is independent of NHEJ, and consistent with a replicative origin
Source: HighWire-hosted journal article supplement (doi:10.1101/gr.240705.118), 2019-03-14
Supplement: Supplemental_file_1.zip [file contig.2.DB37_length_735_mean_cov_8.6.docx]

**DB37_length_735_mean_cov_8.6**

AAACAAAACACCAAAATGTCTATCTGTAGGAATTTGTTTTCAAGTTGTGATACATAGGTACAGTGAAATATTATACATTCATTTAAAAT
 >chr9:107705353-107705597 - E=6e-132 p=1e-02
GATGATAAAATCTGTATTTGTTTACATGAAAAACTGTCCACTATAATGTAGTGAAAATAATAGATTACAAACAATATATATGGAATAAA

ATTGTTTAGAAACAATTTCTAGAAGAAGGTACAATGGACAGAATTATCTCTGGGAAGTGGGTTT|AT|TTGAAGGAAAGACAAGAAATT
 >chr9:107696910-107697
TGTTTGTTTTGGATTTACTTGTAGAATGACCTGCAAAATTTTGTCCTAATAAATGTTAACAAGTGGCTTTCCATACAAAAACCAAACCA
397 - E=3e-219
AACAAAACCCTGATGTAAACCAAAAATAAAATTCTGAGGCCCCCCTTCACCATCTGAATGAACTTCCTCCTCTGCAAGGGCACTCTTAA

AATTTAACATGAAAGACTGGTTCAGGTCATGACGGGAAGTGGGGGTCGGACAGGCCTCATTATGCCTCTCTGGCATTAACATCAACACA

GACCTTAAGTCTGATAAGAAGCATTTACAATCTATTCTTTCTGAAGCCTGTTACCTGAAGGCTTCCTCTGCACAATCAGAACTTTGGTT

TCAACAAGAACTTTTCTTAACCCAGACGTTCCTTCCTATTGAACCCAGGTCTTTAGATAAACTCAACCAATTGTCAACCAGAAAAATTT

TTAATTTACCTATAACCT|GGAAACC
