# Supplementary material for: Chromothripsis during telomere crisis is independent of NHEJ, and consistent with a replicative origin
Source: HighWire-hosted journal article supplement (doi:10.1101/gr.240705.118), 2019-03-14
Supplement: Supplemental_file_1.zip [file contig.2.DB37_length_849_mean_cov_32.6902237927.docx]

**DB37_length_849_mean_cov_32.6902237927**

GAAGGCAGACCGAAGGGAAGGAGGGCATCCTAGGTGACATTTCCATACCCACGCACCCTTTACAATGCTGGGGCTGCCAGTCCACCCTG
 >chrUn_gl000220:122141-122931 - E=0e+00 p=0e+00
TACGTCAACCCACCCCCAAGAACAGCACGGTCCGGGGTGGTCCAGTCTGATCCCAACCGGCCCACCCGGGGCATCCGGTGGAAGTCTTC

GCCGGAGGATCCGAAGGCAGCATCAACGCGGTTCCCCTGGGGTCGCCCGGCAAAGGCCAGCCGGGGGAGGGTAGCGGGACGTGACGGGG

GGGTGGGGGTCGCATCCGCCTCAGAGCTCCCTGGAAGGTGGCAGGTAGCCGGTGGGGCACGCCGAGCCAGAGACGTCCGGCAGGATATA

GATCTGGAAGGCGTGTCAGTCCTCTCCCATACCTCTCCTATGGAAAATGCCAGGGCGGCGGTGGGAGCCTCGGCTGGGGGAGAAGCGGG

GACAAGGGGGAGAGGGAAGGAGGCCCTCGGGAGGTTTCGGCACCGAAAACCCACTCAGCCAAGCTCCCTCCGTGTTTCCGGGTCCAAGG

TACACCCCGGGAGACGGCAAGAGAAACGTTCACACCGTGCTTTCCGTCTTCGTGTTTATTTCTTTCATCTTTTCCATTTTACGAGAGAT

GCTCATTTCAACAACCAGACGGCGGATGTGACGGGAGAAGCGTCAAGGCCAGGAGTTTGAGACCAGCGTGAGCAACAGAGCAACACACG

TAGGAGAGCCCAGCTGAAAGAAATGAAAGAGGAGGAGGAGGAGGAGGAGGAGGAGGAGGAGGAGGAGGAGGAGGAGGA|GGAGGAGGAG

GAGGAGGAGGAGGAGGAGGAGGAGGAGAAGGAAGAAGAAGAAAAAGAA|A >chr17:67944528-67944576 + E=5e-14
