# Supplementary material for: Chromothripsis during telomere crisis is independent of NHEJ, and consistent with a replicative origin
Source: HighWire-hosted journal article supplement (doi:10.1101/gr.240705.118), 2019-03-14
Supplement: Supplemental_file_1.zip [file contig.2.DB38_length_374_mean_cov_23.0240641711.docx]

**DB38_length_374_mean_cov_23.0240641711**

CTCTCTCTCTCTCTCTCTCTGTCTCTCTCTGTCTCTCTCTCTCTCTC|TCTCTCTCTCTCTCTCTCTCTCTCTCT|CTCTCCCCTCCCT
 >chr22:25489704-25489778 + E=5e-30 p=0e+00 >chrUn_gl000220:120137-120464 + E=7e-18
CCCTCCTTGGTGCCTTCTCGGCTCGCTGCTGCTGCTGCCTCTGCCTCCACGGTTCAAGCAAACAGCAAGTTTTCTATTTCGAGTAAAGA
3
CGTAATTTCACCATTTTGGCCGGGCTGGTCTCGAACTCCCGACCTAGTGATCCGCCCGCCTCGGCCTCCCAAAGACTGCTGGGAGTACA

GATGTGAGCCACCATGCCCGGCCGATTCCTTCCTTTTTTCAATCTTATTTTCTGAACGCTGCCGTGTATGAACATACATCTACACATAC

ACACACACACACACACACAC
