# Supplementary material for: Chromothripsis during telomere crisis is independent of NHEJ, and consistent with a replicative origin
Source: HighWire-hosted journal article supplement (doi:10.1101/gr.240705.118), 2019-03-14
Supplement: Supplemental_file_1.zip [file contig.2.DB38_length_392_mean_cov_4.02806122449.docx]

**DB38_length_392_mean_cov_4.02806122449**

CCTATTTTCCAGATGAAGGAGCAGGCACAGTGAGGTTAATTAGCTTATTCAAGCTCACATGGCTACTTGAACTTAGATAATCTGTGTTC
 >chr3:159633816-159634067 - E=1e-139
ACTGGCACTTTAAACAACTATGCGTTCTTAGTGCTTTCTTTTCTTTTCTTTTGGTTTGTTTGTCTTAACCTTGATTTTATCATTTAACC

CCATATGGTGTATATCTGAGTTTGTGTTATATAGCATGACAGTGGGAATGTATACTGAGTTCTCCAAATGGGG|AACTCCT|AGGCTGG
 >chr13
AGTGTGGTGGCATGATCTCAGCTCACTGCAACCTCTGCCTCCCAGGTTCAAGCGATTCTCCTGCCTCAGCCTCCCGAGTAGCTGGGATT
:26537372-26537506 - E=5e-39
ACAGGTGCCCACCACGACGCACAGTTAATCTTTGTATT
