# Supplementary material for: Chromothripsis during telomere crisis is independent of NHEJ, and consistent with a replicative origin
Source: HighWire-hosted journal article supplement (doi:10.1101/gr.240705.118), 2019-03-14
Supplement: Supplemental_file_1.zip [file contig.2.DB38_length_495_mean_cov_5.53333333333.docx]

**DB38_length_495_mean_cov_5.53333333333**

CTTCTTCTCAGATCTCTCTTTTCTAAACTTTAAATGCAGCTGCTTAGTGAACCTAAGCACTCGTGTATCTCACAAGCACCTCAAATTCA
 >chr4:26678589-26678873 + E=2e-159
AGATGTCAACACTCTTCCTAAATTCCTTTTTCAGTACCACTGTCCATCAAGGAACCGTAGCCAGAAACCTGGTGTCATCCCTAGCTCCT

GAATATCATATTGTATTACTCGATAATTATACTACTCAATAATTCCTTCTTGATTTAACTCCTAAACATGTTTCACTACCACTCTCATT

TCAAAATACCAT|CATTT|TTTGTGCTATTTCAATTAAAGCCATTTTTCAATATTTTAGGTTTAATGAAAATACTAAAATATTCCAGTC
 >chr4:26385861-26386077 + E=2e-118
ACAGATACTTAATTGCTTGTGAATTATCAATTCATAAACAGTATCTTAGGACAAATGAACAAAATGAACTAAATGGGATCCTATGACTT

TTATCATCAAAGTTAATAATCTTGTGGAACATTACAAATACAGTAGAGAAAT
