# Supplementary material for: Chromothripsis during telomere crisis is independent of NHEJ, and consistent with a replicative origin
Source: HighWire-hosted journal article supplement (doi:10.1101/gr.240705.118), 2019-03-14
Supplement: Supplemental_file_1.zip [file contig.2.DB38_length_604_mean_cov_8.41225165563.docx]

**DB38_length_604_mean_cov_8.41225165563**

TGTTATATGGCAAGAGATAGGAGGCTAGTTTCATTCTTCTGCATAGGGATATCTAGTTTTCCCACCACCACTTATTGAAGAAACTGTCC
 >chr6:126712788-126713062 + E=3e-153 p=4e-02
TTTCCCCAGTGTATGTTTTTGGCACCTTTGTAAAAAATGAGTTCACTGTAGATGTATGGATTTATTTCTGGGTTCTCTGTTTTGTTCCA

CTGGCCCATATGTCTGTTTTTATGCCAGTGCCATGCTGTTTTGGGTACTATAGCTGTGTAGCATCATTTGAAATCAGGTAATGTGATTC

CTCCA|GT|ATATGCACCCAATACAGGAGCACCCAGATTCATAAAGCAAGTCCTGAGTGACCTACAAAGAGACTTAGGCTCCCACACAT
 >chr6:126997023-126997352 + E=3e-177
TAATAATGGGAGACTTTAACACCCCAATGTCAAAATTAGACAGATCAACAAGACAGAAAGTCAACAAGGATACCCAGGATTTGTACTCA

GCTCTGCACCAAGTGGACCTAATAGACATCTACAGAACTCTCCACCCCAAATCAACAGAATATATATTTTTTTCAGCACCACACCACAC

CTATTCCAAAATTGACCACATACTTGGAAGTAAAGCTAACCTCAGCAAAAGGAAAAGAACAGAAATGAT|GAC
