# Supplementary material for: Chromothripsis during telomere crisis is independent of NHEJ, and consistent with a replicative origin
Source: HighWire-hosted journal article supplement (doi:10.1101/gr.240705.118), 2019-03-14
Supplement: Supplemental_file_1.zip [file contig.2.DB38_length_634_mean_cov_7.1214511041.docx]

**DB38_length_634_mean_cov_7.1214511041**

CCGGCCCGTGGGTGTGGCATTGAAGAAAGTCACTGGTGCCTGGGAGAAGGACGCTGATTGGGCCAGGGCAGAGTCTGGCAGAAGAGGGG
 >chr6:43413034-43413375 - E=2e-193
TTGGCAGGCAGCACTGGGGGAGGTGGGGTGGAGGGGAAGGCCCAAGATAGAGAATAGGGAAGGACTAAAATATCCCCAGAATTTGGGGG

CAGAGAAGAGAGATTGGCAGAGGTTGAGGAAGAATATCCCAGGGCAGGAAAGACTCTCCCATCCCCAGTGGAGCCCGAGTATTGGGAGG

ACACTCCACAGGGGCTAGGACTGCACTCCCCTACCCCCGAGGTCCCAGCCCCTCACCATAAGGACTCGATGCA|G|TAGTCCCAGCTAC
 >chr6:4340754
TCAGGAGGCTGAGGCAAGAGAATTACTTGAACCCGAGCGGCAAAGGTTGCAGTAAGCCGAGATCATTCCACTGCACTCCAGCCTGAGCG
1-43407835 - E=3e-165
ACAGAGCAAGACTCTGTCTCACACACACGAAAAAGTAAAAACCTATAAAAGCTTTTACATAAAATCTGCCCAAGATATCTTACTACCTT

GACTGTTAAAAAGACAGGGTAGTAGGCCAGGCGCGGTGGCTCACGCCTGTAATCCCAGCACCTTGGGAGGCCAAGGTGGGCAGATCACA

AGGTCAGGAGATG
