# Supplementary material for: Chromothripsis during telomere crisis is independent of NHEJ, and consistent with a replicative origin
Source: HighWire-hosted journal article supplement (doi:10.1101/gr.240705.118), 2019-03-14
Supplement: Supplemental_file_1.zip [file contig.2.DB38_length_652_mean_cov_10.0460122699.docx]

**DB38_length_652_mean_cov_10.0460122699**

GAAGTGATGGGGAGAAACGTGGAAGAACTAAGAGAAAGAAAAGCAGCCGCTGACAGCCAGGAAATGGCCCGGACTGCCCACCGGGCCTT
 >chr2:17832680-17833008 - E=1e-185
GGTGCTGCCGGGAGCTGGCCCAGCCCTCACAGTCAGGTCTCACACCAAACATAACCAATGTCACAAAATGCCAGTGACCATGATGGAGC

AAGGCAAAAACAAGACCACTCTGTCATTAAGTCTGAACACAGACACAAAACACCAAGCATCCCTGCTTCCTGCTATGGTGAGTGACCAC

TGCTTCTTCACCCGTTAAGAGCATTGCATTGGTCTGTGTGCCCTCCTCCTAGGTATCTA|AT|TCTTGTCGAAGGTTCGGAAGGCATGC
 >chr2:17830413-17830739 - E
TGGGCAAACTTGGAGGCGTCTCCATAAGGAAAGAACTGCAAAGGAGAACACGCGCAGTCAGGTGTCGGGAGGGGATGGAATCGGGGCGA
=2e-184
CGAGGTAGGTTCCTAATGACGGCATCACAGGTGCTCCTGGGCGTTGTCGGAGCCTCACCCATTGGAGAGCAGTTTGGCCTGACTGTCAA

GGGCAAGGGCAGGCATTAGGGGAGGCTTTCTCACAGCAGGTGCTCAGGTACAGGCATCTCATTGTTTCCTGTGGGTGAGGCTGGTGACA

TGTGGCTTTCAGTTGATGGGGCTTGGAATCG
