# Supplementary material for: Chromothripsis during telomere crisis is independent of NHEJ, and consistent with a replicative origin
Source: HighWire-hosted journal article supplement (doi:10.1101/gr.240705.118), 2019-03-14
Supplement: Supplemental_file_1.zip [file contig.2.DB38_length_677_mean_cov_8.41949778434.docx]

**DB38_length_677_mean_cov_8.41949778434**

TGCCCTTGGTAGCCTCCCTCTGCTTTCACACAGTTCTATCTCCTTCTCTCTCAGCCTCACTTGAGTTCATTATCACAGCTCCTGTCAAG
 >chr5:145974069-145974427 - E=1e-200
GACTGAGGACCCACCAGAGCAAGCTGGAGGCAGGTTGCTAGTGCAGCTCAGAGTGTGCACTCCAGAGCCTGATACCGGGGCTCAGTTCC

CTCCCCTTCTGTCACTTTTTCTGTGTGATCTTGGACAAATGATGTCTTATCTCTGTGCTTCATGCTCCATTAAAGTAAAGAGAATGAAA

GTACCTACATCATAAGATGGCTTTAGAGATGAAATGAGGTTTTGACAGATAAAGCACCTGGCTAATAATGACAAGCCAGCATATTGGGT

AT|ACCAGTCCCCATCACTGCTCATGCCCTGGTCCAGGCCAGAATCTATCACTCAGGTTATAACTGGTCTCCCTCCCTTTGCCTTTGCA
 >chr5:145973216-145973535 - E=3e-180
CCCTTAGGATCCATTGCAACACAGCAGATTCAGCAATCCTTTCTGTGAGGTCTCTTCTTCCTCAGAATAAAGGGCCTATGTAAACTGAT

CATCCTCTCCCCCAGCTGCTTACTCACTCCTCTCCCACCACACTCCCTCCAGGATTCCTGCCTCTAGGCCTTTATGTTTGCTGTTTCCT

ATGCTTGGAGAGCCTTCCCCTCACCCCAAACCCAGACATCACTGTGGCTCATTCA
