# Supplementary material for: Chromothripsis during telomere crisis is independent of NHEJ, and consistent with a replicative origin
Source: HighWire-hosted journal article supplement (doi:10.1101/gr.240705.118), 2019-03-14
Supplement: Supplemental_file_1.zip [file contig.2.DB38_length_771_mean_cov_40.6018158236.docx]

**DB38_length_771_mean_cov_40.6018158236**

TCCTTCCTTCCTTCCTTTCTTCCTTTCTTTCTTTCTTTCTTTCTTTCTTTCTTTCTTTCTTTCTTTC|TTTCTTTCTTTCT|TTCTTTT
 >chr6:133113364-133113444 - E=3e-36 p=0e+00 >chrUn_gl000220:102
GTTTCTTTCTTTCTTGCTTTCTTGCTTGCTTGCTTTCTTGCTTTCTTGCTTGCTTGCTTTCGTGCTTTCTTGCTTTCTTTTCTTTCTTT
897-103592 + E=0e+00
CTTTTCTTTTTCTTTCTTTCTTTCTTTCTTGCTTTCTTTTCTTTCATTCATTCCTTCTTTCTTTTCTTTCTTTCTTCCTTCCTTCCTTC

CTTCCTTCCTTCCTTTCTTTCTTTCTTTCTGTTTCGTCCTTTTGAGACAGAGTTTCACTCTTGTTTCCACGGCTAGAGTGCAATGGCGC

GGTCTTGGCTCACCGCACCTTCCGCCTCCCGGGTTCGAGCGCTTCTCCTGCCTCAGCCTCCCGATTAGCGGGGATTACAGGGAGGCACC

CCCACGCCTGGCTTGGCTGATGTTTGTGTTTTTAGTAGGCACGCCGTGTCTCTCCATGTTGCTCAGGCTGGTCTCCAACTCCCGACCTC

CTGTGATGCGCCCACCTCGGCCTCTCGAAGTGCTGGGATGACGGGCGTGAGCCACCGTGCCCGGCCTGTTGACTCATTTCGCTTTTTTA

TTTCTTTCGTTTCCACGCGTTTACTTATATGTATTAATGTAAACGTTTCTGTACGCTTATATGCAAACAACGACAACGTGTATCTCTGC

ATTGAATACTCTTGCGTATGGTAAATACGTATCGGTTGTA|CGGGAATTAACCTCTCTATGA
