# Supplementary material for: Chromothripsis during telomere crisis is independent of NHEJ, and consistent with a replicative origin
Source: HighWire-hosted journal article supplement (doi:10.1101/gr.240705.118), 2019-03-14
Supplement: Supplemental_file_1.zip [file contig.2.DB38_length_813_mean_cov_7.0110701107.docx]

**DB38_length_813_mean_cov_7.0110701107**

CCTTACAGCTCAATCAATTAACAATGGAAACGTAATTTTGGAAAGTATGGCCATCTCATTTAAAGAAACAAATTGCAAGCACTTTAGAA
 >chr17:34210337-34210710 + E=2e-212
ACATTCATCCAACCACACAAAAATGTTCTACCAATTGTTTCCTTCACAAAGCCCCGTTAGGTCTAAGGTAAGTTACCAAACATGTGAGA

GGTTCTGGAAAAGGCGGTGGGTTAAGAGCAGGGACTCGGCAGTTTCTCCTGTTTATTGTCCAGGTGGCCTCAGGTAAATTATTAATAAT

CTCTCTGGTCTCAGTTTCCTTACCTATAAATCAGTGATAATAATAATAATAGTTCCTCACACAACTATCGAGACAATTAAGTCCCTATA

AATGTTCTCATGCTTGC|T|CACTGCACCATGCTGGGCTAATTTTTAAATTTGTCGTATAGATGGGATCTTGCTATGTTGCCCAGGCTG
 >chr17:34212093-34212532 + E=3e-246
GTCTCGAACTCCTGGCTTCAAGCAATCCTCCCACCTTGGCCTCCCAAAGTGCTGGGGTTGTAGGCATGAACCGCCACACCCAGCCATGG

GAGTATTTTTCTTCCCTTTCAGTGATTCTAATGGATTGTGAGGAGCACAGGAGGGAGGAGAATCTAATTTTTATTTCATGTCTACCATT

CATTTTCTCCTGTGCAAAATCAAGGTTTGGGCTTGATGGGCTATCTTCAATTTTTTCTCTGGTGCTAATGAACTGATTCCATAAGCAAA

TTAGAGAGCCCATGTAAACAGTATGGTGCCTGGTACAGGGTGGGTGTTCACTGAATGGCAGCTATCATTATTATTCACCCAGCACATTA

TGTTCCTGAAAACC
