# Supplementary material for: Chromothripsis during telomere crisis is independent of NHEJ, and consistent with a replicative origin
Source: HighWire-hosted journal article supplement (doi:10.1101/gr.240705.118), 2019-03-14
Supplement: Supplemental_file_1.zip [file contig.2.DB38_length_838_mean_cov_9.69331742243.docx]

**DB38_length_838_mean_cov_9.69331742243**

TCTTTAATCCATCTTGAATTGATTTTTGTATAAGGTGTAAGGAAGGGATCCAGTTTCAGCTTTCTACCTGTGGCTAGCCAGTTTTCCCA
 >chr4:19641002-19641305 + E=2e-170 p=3e-02
GCACCATTTATTAAATAGGGAATCCTTTCCCCATTGCTTGTTTTTCTCAGGTTTGTCAAAGATCAGATAGGTGTAGATATGCGACGTTA

TTCCTGAGGGCTCTGTTCCGTTCCATTGATCTATATCTCTGTTTTGGTACCAGTACCATGCTGTTTTGGTTACTGTAGCCTTGTAGTAT

AGTTTGAAGTCAGGTAGTGTGATGCCTCCAGGTT|TG|ACCTCATGATCCACCTGCCTTAGCCTCCCAAAGTGCTGTGATTACAGGTGT
 >chr4:19767819-19768362 + E=6e-301
GAGCCATCAAGCCAGGCCTATTTGGAAACTTTTGAGCTTCCTGCATATGTATGTTCATATGTTTCCTAAGAAATAGGGAGTTTTCAGCT

ATCATTTTATTAAATATATTTTATGTGATTTTTTTCCTGTCTCTTCTCTGGAATTTTCATAATGTGAATTTTTATTTACTTAATAGTCT

TCCATAATTCCTGTAGGTTTTCTTCATTCTTTTGGTTTTTCTTTTATTTTTTGGTCTGATTGAGTTATTACTTAAAAATTTGCCTTTAC

ATTCAGAAATCCTATCTTCTGCTTGATGTAGTCTGTTGTTATATATTATGTTTTATTTAATTCATTCAATTTTTCAGCTCCAAGATTTC

TGGGATTTGTTTTGTTTTTGTTTTTGTTTTTGTTTTTGTTTGTTGAGACAGAGTCTCACTCTGTTGCCCAGGCTGGAGTGCAGTGGCAT

CATCTCAGCTCACTGCAGCCTCAACCTCCTGGGCTCAGT
