# Supplementary material for: Chromothripsis during telomere crisis is independent of NHEJ, and consistent with a replicative origin
Source: HighWire-hosted journal article supplement (doi:10.1101/gr.240705.118), 2019-03-14
Supplement: Supplemental_file_1.zip [file contig.2.DB38_length_865_mean_cov_8.56300578035.docx]

**DB38_length_865_mean_cov_8.56300578035**

ATATATACACACACACATCTATATCTATCTATATATCTATACATATATATACACACACACAATGTAATAAGAAAATTCTGATACATGCT
 >chr3:188318379-188318763 - E=4e-219
ACAACATAGATGAAGCTTGAAGAGATTAAGCTTGAAGCTTGAAGAAACAAGCCAGTTACAAAAACAAAAAACAAAAAACAAATACCATA

TGGTTCTACATATAGGAGGCCCCTAGAAGAGTCAAATTTATAAAGCTAGAAAGCAGAATGGTGATTGCCATGGGATGGGAGAAGGAAGA

ATGTAGCTAGTGCATTATTGTTTAATGGATATGTCATTTCAGTTTGAATAGATACAGTTCTGCTGGTGATGGTTGCACAACAATGTAAA

TGTACTTAGTGCCAGTGAATTATACGCT|GGCTTATAGGGGGAGCTGCACTCAAGGTCAGCCAAGATGCTGGTCAAGGAGTCAATCTCA
 >chr3:188242080-188242562 - E=3e-273
GCGTCCAGGCTGGAGCGCCTCTCCTCAAGTGTCTTGCCTCCGGGATTCCCCTGTTGGAAGCAACACAGACATGTTAACAAAGGAAATTT

CCCTTGATATCATTATAAGTTCAAATTTCTCAAGTTATAATGTGGCTTTGTCCAAGTTTTTCTGCACCTCTTTTTTTTTAATTAAGCTT

TCATAAAATCTCAGTGAGGTAGGCTGAGATAGAATTATCACTTTATGACAGATATGAAAACTGAAAAATAAAAGATGATTTTTCTCAGG

TCACACACTTATTTAGCAGTTTTGTCGTTGTTGTTGTTTAAAATAAGTATACAAGTAAAGGAAAATAAATGTCTCCATTCCTGCACCTA

AAGAACAGAACCAGCTGAAGAGAGCTCACAAGCACTTGGTGTTTAGACACCACTGCCTAGAATAA
