# Supplementary material for: Chromothripsis during telomere crisis is independent of NHEJ, and consistent with a replicative origin
Source: HighWire-hosted journal article supplement (doi:10.1101/gr.240705.118), 2019-03-14
Supplement: Supplemental_file_1.zip [file contig.2.DB38_length_930_mean_cov_8.86559139785.docx]

**DB38_length_930_mean_cov_8.86559139785**

TGCAGTAGACAAAGAAAGAGGAAGGCAAGGAATACTGGAACCAGGAGCTTCACAGGATAGTGGGAAAAGGAAGCCTAGGATGAAAGTGA
 >chr2:46320996-46321435 - E=4e-246
AGTGGGATGCCAGGGTGACAGCTTTGCAGCAGGCACACAGGGCAGAAGGTAACCATTTAGACTGGAATAGTTTACAAGGCTTGGCAAAG

AATGTATCCAAGAATATGAAATTGATAGAATACTGCTTATACCTAAACATGCTAAAAGGAGATATGGACAGTTTGTAGAGAGTTTGTGG

TTGAATCAATAATAATTACATAGAAAACAAAGAGATATTTATTAACTTCAGGGAAAATAAACAAAAAAAATGCACTGGGAAGGAAAAGT

AACTATAGCATACCACATAACTGAATTCCAAATGGTATTTCACAGTTATAATAATGTATACTATATATTCATTTAACCAAAA|T|GAGG
 >chr
TGGGAGGATCACTTGAGTCCAGGACTTCGAGACCAGCCTGGGCAACATGGTAAGACCCTGTCTCTTAAAAAAATTAGCTGGGCATGGTG
2:46376732-46377241 - E=6e-263
GTACGTGTCTGTAGTCTCACCTTCTCAGAAGGCTGAGGTGGAAAAATCACTTGAGCCCGGGAGTTTGAGGCTGTAGTGAGTCATAATCA

TGCGACTGCACTTCAACCTGGGTAACAGAGTGAGACCCTATCTCAAAAAAAAAAAAGGATCTTTTCTGATTGGCTATTCTATTTGATCT

GCTCTCCATACACATATGTCATAAATACATGATACACACACACGCACATATAAATATGTAGCATGTCAATGACATATATATATAAATAC

ATATATATAAAAATACATATATATATATATGGAGATGACATCCAATAGAAAAGACTAGAATTTAATATCACCTTTCAGCTGTATAGAGC

TTTGTATTTTACAGTATGCCTTTAAAATATAACATATATAAA
