# Supplementary material for: Chromothripsis during telomere crisis is independent of NHEJ, and consistent with a replicative origin
Source: HighWire-hosted journal article supplement (doi:10.1101/gr.240705.118), 2019-03-14
Supplement: Supplemental_file_1.zip [file contig.2.DB39_length_541_mean_cov_5.94454713494.docx]

**DB39_length_541_mean_cov_5.94454713494**

TCTCCTTGAAGAGGTCCTTCACATCATTTGTAAGTTGGATTCCTAGGTATTTTGTTCTCTTTGTAATAATTGTGAATGGGAATTCACTC
 >chr10:81350464-81350671 - E=6e-110
ATGATTTGCCTCTCTATTATTGACGTATAGGAATGCTTGTGATTTTTGCACATTGATTTTGTATCCTGAGACTTTGCTGAAGTTGCTCA

TCAGCTTAAGGAGATTTTGGGCTGAGAC|A|TACATACTTCTCATGATTGGGAAAGAAACACAAAGGCCATAGCAAACCTGTAAGCACA
 >chr10:81346626-81346961 - E=5e-190
CGTTAAGCTGCTGCTCCCTTCGTTTCAGCTCAGGGTCACATGGCCACACCAAACAGCAAAGGGGCTGGAGTGTTTACTCCTCACACTCC

AGTGGGAGCCTTTGTGAAGTCCTATGGCAAAGGGCCTGAGATGTAATTTTACAACATGGAGGAAACAACCCAAACTACCATGGCCATAT

CTGCTAAGTTTATGTCTCTTACAAAGAACCAGTATTCTATTTTATTAGCTCTATAGTTATTTTTGTTTATTAATTTAATTATATAATTT

TCATTCATT
