# Supplementary material for: Chromothripsis during telomere crisis is independent of NHEJ, and consistent with a replicative origin
Source: HighWire-hosted journal article supplement (doi:10.1101/gr.240705.118), 2019-03-14
Supplement: Supplemental_file_1.zip [file contig.2.DB39_length_576_mean_cov_4.42708333333.docx]

**DB39_length_576_mean_cov_4.42708333333**

CAGCCATAAAAAGAATGAAATCATGTCGTTTGCAGAAAAATGGATGCATCTGGAGGCCATTATCCTAAGTGAATTAATGCAGAAACGGA
 >chr1:89609587-89609908 - E=2e-181
AAACCAAATACTCCATGTTCTCACTTGTAAGTGGGAGCTAAACAATGAATACACATGTACATAAAGACGGGAACAATATACACTGGGGA

ATACAAGAGGGAGGAGGCAGGGAGGGAAGTAGGGTTGAAAAACGACCTTTGGGGTTCTACATTCACTATCTGGGTGACTGTTTTGACTG

AAGCCCAAACCTCAGTATCACGCAATATAGTCATGTAACAAACCTGCATGC|GAA|ATGACCATTTCTGGAGCTAGAGAAAGACAAGGA
 >chr1:89726436-89726694 - E=1e-143
GGGTGAATAATTACAGAAATAGGTTAGATGCACGTGAATGGAAGAGAGATATTCAGGAACTGTTTACTGCTACTGTAGATGAAAAGAAG

TAAGGACAAGTGAGTGATTTAGGCAATCAGTAAGAAGCTTGATCTTACTTTCTATTTATCACTCTTTAGGAACAGGCTGCACAGCTCAG

CACAACATTCCAAGCTCAAAATAGAAGCCTTCTCAGTGAGCTCC
