# Supplementary material for: Chromothripsis during telomere crisis is independent of NHEJ, and consistent with a replicative origin
Source: HighWire-hosted journal article supplement (doi:10.1101/gr.240705.118), 2019-03-14
Supplement: Supplemental_file_1.zip [file contig.2.DB39_length_624_mean_cov_4.94391025641.docx]

**DB39_length_624_mean_cov_4.94391025641**

AAACCACACTTATCCTCAAACTTCACAGTAAGCCCACAGCAGCCCTGCCCAGGGAGAGGGCCTGTCAGCCGGGTACCCTGTGTCCAGGG
 >chr17:27082701-27082919 + E=2e-119
TTTCATTGAAGAACTGTCTACAATCACCATAGCACCTGGCCTTAAATAATGGATTTGGAGACGGCTTCTGGGTGGGATGCATATTACAG

GGGTACCCCTTTTAAAAATTAGGAATTACTCCTATGAAGT|AAGGCATGACTTGCAGCTGTCTCCTGGATTGTGTCATCATGGGGTATC
 >chr17:27069077-27069394 + E=5e-179
AGGGCTGGCAAAACCCCTGCTCTGCTTTTGGCCTTGGATATGGAAACCTCAACCACTTTGTTCTCCTACCACCTCTTTGCCCTTCCTAC

CCCTTCCTCCCTTCAGTCAGTGTCCCCAGGGTCCAGCCTGGCTAGAGTTAGAAGGCAGACCTAGCCTTTGGAAGCAGGGTGGCCTCCAG

AGCCTTGCCATAAAAAGGCTGAAGGCAGCCGGGCGCAGTGGCTCACGCCTGTAATCCCAGCACTTTGGGAGGCTGAGGCGGGCGGATCA

CG|TGAGCTCAGTAGACTGAGGCGAGCGGGGCCAACGGGGTGAAACAGATCGGAAGAGCGGCGTGGAGGGAAAGGGTGGGTGAGGACGT

GGA
