# Supplementary material for: Chromothripsis during telomere crisis is independent of NHEJ, and consistent with a replicative origin
Source: HighWire-hosted journal article supplement (doi:10.1101/gr.240705.118), 2019-03-14
Supplement: Supplemental_file_1.zip [file contig.2.DB39_length_628_mean_cov_3.82165605096.docx]

**DB39_length_628_mean_cov_3.82165605096**

TGAAATTAATAAAGGGAAAGAATTTATGAGGCTATGATTTTGTATTTTGTATCTGAACTATATATACTGTTTTTCTGTCAGTCTTTGTG
 >chr13:85773844-85774215 - E=1e-211
TTTTATGAAGATATTCTGGGTAGTCATCACATGGACATGCTGATTAGGATGCATTCATTGACACCTCTGTTTTTGGACTCTATAAAGGT

CAGCCAAACATATGGCCCCAAACAGCTTATATTCCTAAATCTTGCCAAGTTTGGAAAATTGAACCTACATTGTATATCAGAAAAAGACA

ATTTTATTCAGCAACTCATAAGTATTTTGTACAGACCAGGGTACTGTACAATATTATCTTCTAACTTAATAGCCCAGTTTTCTCTGTGG

AAGCCAGGTATGCT|T|GATCCATGGACTGTCAGCAGGAATATCAGCTGTTAGTGTGAGAGAAAGGCAAAATTTCAAGTCCCACCTCAC
 >chr13:85775384-85775642 - E=2e-143
GTTTTTAAATCAGAATCTAAATGTTAACAAGATGGCCAGTGGTACCTATGTGCATTAAATTTTGAGCAGAGCTGGAATTTGCAATAAGT

TAAACTGTTGCTCTCACAAGCATCATTTTTTAAACTCTTGATTTTCAATTCTTCATTTTGTGGTGACAATGACAAAAAAGACTTGCAGT

TTAACTG
