# Supplementary material for: Chromothripsis during telomere crisis is independent of NHEJ, and consistent with a replicative origin
Source: HighWire-hosted journal article supplement (doi:10.1101/gr.240705.118), 2019-03-14
Supplement: Supplemental_file_1.zip [file contig.2.DB40_length_337_mean_cov_4.0059347181.docx]

**DB40_length_337_mean_cov_4.0059347181**

GAGACACATCATTCATTGCTCCTACTTGTGTCTGTAATCAGAGAGTATTTAAGGAGGGCAGTTCTGCGACGGACTGTGTGTGTGTTGAA
 >chr10:98103989-98104106 - E=5e-59 p=1e-03
AGTAAAGATGGGGGGCCGCGGGGAA|GGC|TCTAGAATCATTATAAGACAGAGGGTGGGGCGTTCCAAAGAGGCAAAGATCAATCGTGT
 >chr10:98166902-98167125 - E=5e-123
TCATCAGGGCAATCAGACACAGGCTCGAGGAGGGGGACACTTGAGCAGGCCTGGGAAGGGTTTCTCTGACATGGGACTGTCAGGGAACA

CTGGGAAACAGGTTGCACAGGACAGGCTCTGGGGGTGTGGAAAGTAAGCAGAATTTAATTCATGAGATGGGG
