# Supplementary material for: Chromothripsis during telomere crisis is independent of NHEJ, and consistent with a replicative origin
Source: HighWire-hosted journal article supplement (doi:10.1101/gr.240705.118), 2019-03-14
Supplement: Supplemental_file_1.zip [file contig.2.DB40_length_555_mean_cov_9.00900900901.docx]

**DB40_length_555_mean_cov_9.00900900901**

AGGGAAAAAAGAAAAGAAACAACAACCATGTAGCCACTCCCTGGGGTGGGGAGGAAGGGTTAGGAGTTTAGAGTGAATCTTGGAGGAGG
 >chr2:46771483-46771886 + E=5e-231
AGGGGTTCCCCCCGGCCCTACTTCAGAAGGGCCAGGTGACTTTGTCTGGGTTTTCTTTGGGAGAGATTAATTGTGCAGAAAGAAGATGC

ACACTTTGCCCTGCAGCCTCTGGCCAGGGTTTGCACATCAGAGGTGGCCAGGCTGTGCTTCTAAAGGGCCAAGGTCTTCTCTCTGTCTC

CCTGTCCCAGCTTCAGCCTCTTCCCAAACCCACTTTTGCTCTGGGGATAAGTTGTGTGTGATGAATTTTGTAGAATCCAGCACTATGAT

TAGAGTTGAAGACTCTGGCAGAAGTTTCCACATGTCATACAGACT|TA|TATACATATACATATATATATGTATATGTATATACATATA
 >chr2:46773621-46773777 + E=4e-67
TATATACACAAATCCTTAAGCCTAGTGGGCAGCAGAGAAAGGTCCATGGGCTTTGGAACAAAACAGGCCTGGGCTCAGATCTCCACCTT

AGCTAGTCATGTGATTCTAGCTA
