# Supplementary material for: Chromothripsis during telomere crisis is independent of NHEJ, and consistent with a replicative origin
Source: HighWire-hosted journal article supplement (doi:10.1101/gr.240705.118), 2019-03-14
Supplement: Supplemental_file_1.zip [file contig.2.DB40_length_631_mean_cov_10.6973058637.docx]

**DB40_length_631_mean_cov_10.6973058637**

GAGTGAGGGAATAGCATTCTCCAACATTGCTGTCTCTGCATATGTCTTTGTTACAAGGCAATGGCAGACTGCTACAGAGTGTAATGGAA
 >chr12:127280223-127280410 + E=9e-101
TGGTAAAGCTAAAATGGGTCATTTCCTAAAAACAGTGACATCAATCTGATTCTTCAAAGCATAGAGGTACTGAAGAACAAATAGGGAAC

CATGTGGG|C|CTTGCCCTTCCTGGTTGTTGGTGGAATTCAGTTCCTTGTGATTGTAGGATCAGGGTTCCTATTTGCTGTTGTTTGCTG
 >chr12:127280934-127281382 + E=1e-250
TAAACTTTAAACTGAGGACCACTCCTGGTGTCCAGAGGACACCTGCACTCATGGGATCATGGTCTTGTCCCTCTATTTTCAAAGCCAGC

AGTGTCAGAGGTCAAGGTCTCACCTTCCAACCTCCCTTTCTCCTTGTAAGGACTCTTGTGGTGTGTTGGGCCCACCCAGACAACCCAGG

GGCATCTTCCCATTTCAATATCAACTAATTAGAAATCTGAATTCCATCTGAAAACATAATTGTCTTTTGCTTTGTAAGGTAACATATTC

ATAGATTCTGGGGATTAGAACCTGGATGTCTTTGGAGGACCATTATTCTAACACACTTACCTAAACTGCCTGTGATACGGAAGCTGGAC

AGTGTATCTG
