# Supplementary material for: Chromothripsis during telomere crisis is independent of NHEJ, and consistent with a replicative origin
Source: HighWire-hosted journal article supplement (doi:10.1101/gr.240705.118), 2019-03-14
Supplement: Supplemental_file_1.zip [file contig.2.DB40_length_761_mean_cov_8.97897503285.docx]

**DB40_length_761_mean_cov_8.97897503285**

GAAATGGTTATGGTAATTACAGTAAAACTATTCAACATAGTGTTCTTT|AAGCTGAAACTGGATCCCTTCCTTACACCTTATACAAAAA
 >chr4:66998594-66998724 + E=2e-66 p=0e+00 >chr9:5036665-5037378 + E=0e+00
TTAATTCAACAGGGATTAAAGACTTAAATGTTAGACCTAAAA|CCATAAAAACCCTAGAAGAAAACCTAGGCAATACCATTCAGGACAT

AAGCATGGGCAAGGACTTCATGACTAAAACACCAAAAGCAATGGCAACAAAAGCCAGACTTGACAAATGGGATCTCATTAAACCAAAGA

GCTTCTGCACAGCAAAAGAAACTACCATCAGAGTGAACAGGCAACCTACAGAATGGGAGAACATTTTTGTAATCTACTCATCTGATAAA

GGGCTAATATCCAGAATATACAATGAACTCTAACAAATTTACAAGAAAACAACAACCCCATCAAAAAGTGGGCGAAGGATACGAACAGA

CACTTCTTGAAAGAAGACATTTATGCAGCCAAAAGACATGAAAAAATGCTCATCACCACTGGCCATCAGAGAAATGCAAATCAAAACCA

CAATGAGATACCATCTCACACCAGTTAGAATGGCGATCATTAAAAAGTCAGGAAACAACAGGTGCTGGAGAGAATGTGGAGAAACAGGA

ACACCTTTACACTGTTGGTGGGACAGTAAACTAGTTCAACCCATGTGGAAGACAGTGTGGTGATTCCTCAGGGATCTAGAACTAGAAAT

ACCATTTGACCCAGCCATCCCATTACTGGGTATATACCCAAAGGATTATAA
