# Supplementary material for: Chromothripsis during telomere crisis is independent of NHEJ, and consistent with a replicative origin
Source: HighWire-hosted journal article supplement (doi:10.1101/gr.240705.118), 2019-03-14
Supplement: Supplemental_file_1.zip [file contig.2.DB41_length_265_mean_cov_1.69811320755.docx]

**DB41_length_265_mean_cov_1.69811320755**

AGATGGCAAGGGCAAGGGAGCTGAGGCTGAACAGTCTTGATCTCTGAAACAGATGGTGTGCACGTGTGTGTGTGCATGTTTGTGTAAGT
 >chr17:75869156-75869378 - E=8e-120 p=0e+00
GTGTGCATGTTTGTGTAAGTGTGTGCATATGTGCGTGTGCGTGTTTGTGTGCGCATGTGTGTGCATGTGTTTGTGTCTGCATGTGTGTT

TGTGTGTGCGTGTGTGCGTGTGGGTGCTTGTGTGCGTGTGCGT|G|GGTGTGTGTGTGTTGGGGTGTGTTTGTGTGTG|GGTGGGTGTG
 >chr14:100633657-100633690 - E=1e-05
G
