# Supplementary material for: Chromothripsis during telomere crisis is independent of NHEJ, and consistent with a replicative origin
Source: HighWire-hosted journal article supplement (doi:10.1101/gr.240705.118), 2019-03-14
Supplement: Supplemental_file_1.zip [file contig.2.DB41_length_302_mean_cov_4.96688741722.docx]

**DB41_length_302_mean_cov_4.96688741722**

AATTCAAGGTGAGATTTGGGTAGGGACACAGACCCAAACCATATCACCAGGAAAATAAAATCCTTTAGCATTCATGACTGTCAATGCTT
 >chr5:25596848-25596978 + E=6e-67 p=4e-02
AACATTGTGCTGGCTGGTAAAATTATATATATATATATATA|ATATATAATATAATC|CTGTGGGATTTTCAAGGCAGTAGAGAAGCAA
 >chrX:3413627-3413784 - E=3e-8
GCCTTGAAAGCAACAATGAATGAGAAATATTCTCCATTTTTTATGTGGGTTGTTGGATCCATGCTTATTTTATTGGCTTGCTTCTTAAC
3
ATGCTTTGCATATTCATCCTTTCACACCATTGCATAT
