# Supplementary material for: Chromothripsis during telomere crisis is independent of NHEJ, and consistent with a replicative origin
Source: HighWire-hosted journal article supplement (doi:10.1101/gr.240705.118), 2019-03-14
Supplement: Supplemental_file_1.zip [file contig.2.DB41_length_724_mean_cov_3.52209944751.docx]

**DB41_length_724_mean_cov_3.52209944751**

ATGTTAGCAAGCGGCTTCTTGATTGAAGTGAGGAT|CACTAAAACATGATAATGGTTCTACTTACAATAGCTGTTTTAACAGGAAATCT
 >chr5:130799632-130800055 + E=1e-227
TCAAAAGCACATCTACAAATAAGCACATCCACTAATAAGCTTATTCACCTTCCATTGAGTTGAATTCTATCAGCTAATTTGGAGAACTG

ATCTGGAAGTCTTCTCTGTTTTATGACACCCTCAGGAGTAACAGAAACTTCACAGAGAGAATATGTGTCGGATGCACCGGTCAAACCAA

ATTCATGAACAGCATGAAAAACTACTTCTTTAGCTGTGGTGACTATACTGATGATAAGGTAGCAACTTTGCTGATCCACTTTGAAAACT

CTTATAACTTGCTCAGGGATATCTACATAAATAGAAAGATATGCTTTGTTATTTTTTAAAAAAATCACTTTTAAACCCTTCAAAAAGCA

ACGTGAAACA|CAGT|AAGGCCAAAAGTGGGAGGCAAACAGAGTGAGTTAAGGTTCAGATGTAGTCCAGGTTCAGTCTGTGCAGGCCAT
 >chr5:129179993-129180263 + E=1e-150
TACTGGCCACTCTGAGGGTTTTGGTCTTGTGGCAGGAGGCAATATCCATGTCTTCATTGTGACAAGAGTGGTGGCAGAGATGTATGAAT

GAAAGAGACATACTGAAAATCAACAGGATTTTCTAAGGTAGCCAAATCAATAGGATTTCCTAACATTAGAGGTGTGTCAGTGTTAAGAG

TGAAAGAATAATAGG
