# Supplementary material for: Chromothripsis during telomere crisis is independent of NHEJ, and consistent with a replicative origin
Source: HighWire-hosted journal article supplement (doi:10.1101/gr.240705.118), 2019-03-14
Supplement: Supplemental_file_1.zip [file contig.2.DB41_length_754_mean_cov_8.32360742706.docx]

**DB41_length_754_mean_cov_8.32360742706**

TGAGGATGATTTGCATAATTCATTTTTAGAACATTAATTAGCCGGGATGTGTAATAGTTCTTGTGCCAATTTGTGTTTCAATTTCAAAT
 >chr2:16255564-16255919 + E=9e-199
GCAAATACAAATTAGCAAATGTTATTCCTGTGGCACCTTAAGGATGAAACATTTGCTGCTCGTCGTATTAATCTTTACATTTCTGAAAC

TATCACTGATAGAAGCAATAATATCCTCTAATTTGCAGGATTGAGAAAAAAATGTAGTCTGATGGGGGCTGGGGTGGGTGAGAGGTTAA

TTCTCTTTCAGCAAAAGAAAACAGCATCCATCCATCGATTAAATAGTGCTGAGTACCTACTAAATGTCAGACGTTGTGGTAGCAG|GCA
 >c
|TACTGGCTCTGCTCCTGCAACTGAAGCAGACATCAGGACCCGGTCTGTTTGAGCCAGAAACAAAGGGCACCAAGCAATAAAAATGAGC
hr17:75869818-75870220 + E=5e-230
CCATCTTCTCGTCCCACACCTCCCACGGCCATGGCCTCACAGGAGCCCCGTCTCCTCGCTGAATACGTCCAAGGATGTGTCCATTTCAT

CCTGGCTGTTTTAAAAAGCCATCCTGGAAAAGATGCTCACGTGGGTAGCCCTTTGCCTCAGCGTCAGCTGGTTGACTCCACTCGAAGCA

GCCCCTTCCTGCACCAGTAGCCCCTCCACCCTGCTCAAACCCGAAACTGGGGTCCCCTTCAAGGTCTCTGTGCCCCTTGCCCCAGGCCA

AGCCTGCAGAGTCCAGCCTTGCAGACCAAGCCTGCAAAGCCCAT
