# Supplementary material for: Chromothripsis during telomere crisis is independent of NHEJ, and consistent with a replicative origin
Source: HighWire-hosted journal article supplement (doi:10.1101/gr.240705.118), 2019-03-14
Supplement: Supplemental_file_1.zip [file contig.2.DB45_length_268_mean_cov_7.46268656716.docx]

**DB45_length_268_mean_cov_7.46268656716**

GTTATTGATCTCCCATTTTTATCACTAAAAATTGTGAAAACCCTTAGGTAGAGAAGCTACATAAATATTTCAGCCTCACCCTTTATCTT
 >chr18:70102324-70102440 - E=1e-58
ATCTTGTGATCCTCAAATCTTTTTT|TT|GTTATTTATATGCATCTGAGGATTGGAGGTGAGCCTTCAATACCTAATCCAGGATTCAAT
 >chr18:70101392-70101546 - E=1e-81
TTAGAACATACAAATTATTCCACAAATTCTCACCATTTTCATAATTTTGAGACAGTCTTAAGATATTAAAAGATAAAGGCAAAAATTAC

TCT
