# Supplementary material for: Chromothripsis during telomere crisis is independent of NHEJ, and consistent with a replicative origin
Source: HighWire-hosted journal article supplement (doi:10.1101/gr.240705.118), 2019-03-14
Supplement: Supplemental_file_1.zip [file contig.2.DB45_length_374_mean_cov_8.94385026738.docx]

**DB45_length_374_mean_cov_8.94385026738**

AGCATCCTCATCACCCCCACCCGGGCTCCACCCCCTTGCCTGGGGCCCTCTGGCCGGGCCTGGGAGGCACCTGCTGCAGCTGGCACAGC
 >chr8:142425884-142426207 - E=1e-175
CCCAGGCCTTTCGGAGAAGTCTATTTATAACCAGGCAGGAGCCGTTCCTGGAATCCTCCCAGAGCGGGCCCAAGTCCGCCCATTGCTAG

GGGGCCAGGAGGGGAGACCCAAGCAGGCCAAGCCCACGCTTGATGCACTAGGACGCCTTCCCGGAGTCCTCCAGGCCCCTGCACTCGGC

AGCTCCAAGGGCCCAGCCTCCTCACTGCCACATCCCCCCATGCCATCCCCT|CCCC|CCCCCCCCCCCCCCCCCCCCCCCCCCCCCCCC
 >chr2:33141317-33141373 - E=3e-22
CCCCCCCCCCCCCCCCCCGC
