# Supplementary material for: Chromothripsis during telomere crisis is independent of NHEJ, and consistent with a replicative origin
Source: HighWire-hosted journal article supplement (doi:10.1101/gr.240705.118), 2019-03-14
Supplement: Supplemental_file_1.zip [file contig.2.DB45_length_422_mean_cov_9.22748815166.docx]

**DB45_length_422_mean_cov_9.22748815166**

TCCCCACCCCAACTACAGGGCCTGGGTCTCCGTGCGCCATCCCCCTCCCGCCCCCTCCCGCTCGCTCCCGCTGTTACAGGGCCCTAGGG
 >chr8:142425410-142425797 + E=6e-216 p=0e+00
ACCGCCCTGTCCCCCGTGGGCCCCAGAGCCCAGGCCAGCGCTGGAGGGACCCTCCTGCCCTCTGGCCGGGACCAGGGTGCCCGCCGCAG

CCCTGGGACCCTGCGGCCCCGGTCCCTATTCGAGGCCCCAGCCGGAGCGTTCCGGGATCCTTCGGGGGAGTGCCCAGCCCCGCGCCCCC

GCCTCCCACATGACTCCGGGTGGGCCCTTTTGACGTGCGCGGAGGGCGGGGGGCAGGGGGCGGGGCGGGGGGGCAGGGGGCAGGGGTGG

TGAAGGGGAGGGGGCGTGGCGGGGGGAGGGG|GAGGG|GGCACGGCGGGGAGAGGGGTAGGG|GCCGGG >chr4:187403297-187403321 + E
