# Supplementary material for: Chromothripsis during telomere crisis is independent of NHEJ, and consistent with a replicative origin
Source: HighWire-hosted journal article supplement (doi:10.1101/gr.240705.118), 2019-03-14
Supplement: Supplemental_file_1.zip [file contig.2.DB45_length_484_mean_cov_4.02892561983.docx]

**DB45_length_484_mean_cov_4.02892561983**

TTTCTTATCATCTCAATCTTCTCAACTCTGTAAGATTGGCACATTTCTTTCCCATGTTATGAAGGACAGAACTAAGGTAGAGTAGTTAA
 >chr11:94215363-94215568 + E=8e-112
GTGACTAACATAATTTTACAACTACTAAATGACAGAACCAGGATTTGAACTCCAGCTGTTTTATACCGGAACCCATGCTCTTAATCACT

ATGCTAAACTTTCTAGCAACTCACCTA|TATATATGC|ACACAGGGTACACTCGTCCTCCTGCAGCTTTGGGAGGAAGAGAGTGGGGGC
 >chr22:39823806-39824052 - E=2e-118
CTCAGGCAGCAGCTGAGGAGAAACCCAGGGTAGCAGGGGCATAGCTGCTCCATGGCCTGATGGGGTGGTGCCTGAGGGCTGAGTGTGGG

TGGCGGCCATGCCTGGCTCCCCAAGCCCAGTGGGGCCCCCTGCCCCTGGGAACAACTCAGGAGGAGTTTCCCTTGTCAGATACTCTTCC

AGGCCGGGCTGCGAACT|GCTTAATGCTGTAAAGCCTACTGG
