# Supplementary material for: Chromothripsis during telomere crisis is independent of NHEJ, and consistent with a replicative origin
Source: HighWire-hosted journal article supplement (doi:10.1101/gr.240705.118), 2019-03-14
Supplement: Supplemental_file_1.zip [file contig.2.DB45_length_526_mean_cov_6.50380228137.docx]

**DB45_length_526_mean_cov_6.50380228137**

TCTATGGTTTGAGTCAACTTGATATGATTTAAAGAAACAGAAATGCTTCCTCTCTGCCTGCAAATGACAAAACTCCCATATGCATCCAT
 >chrX:46143149-46143363 - E=4e-117
TTTGGGGGGTTAAAGCTTTAGAAGGCAGTTAGAGTGCAACTATACCAAATGAGTTCCTTTTTTTTGAGACAGGAGTCTGGCTCTGTCGC

CCAGGCTGGAGTGCAGTGGCGCGATCTCGGCTCA|CT|TGTAAAGCTCTAAGTCTGGAATACTAATTCAAGGTAGTGGGTTAGAAACTC
 >chrX:46142867-46143183 + E=9e-121
ATTTGGTGGCTGGGCGCGGTGGCTCACGCCTGTAATCCCAGCACTTTGGGAGGCCGAGGCAGGCGGATCACGAGGTCAGGAGATTGAGA

CCATCTTGGCTAACACGGTGAAGCCCCATCTCTACTAAAAATACAAAAATTAGCTGGGCGTGGTGGCAGGTGCCTGTAGTCCCAGCTAC

TCGGGAGGCTGAGGCAGGAGAATAGCTTGAACCCTGGATGCGGAGGTTGCAGTGAGTGAGATTGCGCCACTGCACTCCAGCCT
