# Supplementary material for: Chromothripsis during telomere crisis is independent of NHEJ, and consistent with a replicative origin
Source: HighWire-hosted journal article supplement (doi:10.1101/gr.240705.118), 2019-03-14
Supplement: Supplemental_file_1.zip [file contig.2.DB45_length_576_mean_cov_5.72916666667.docx]

**DB45_length_576_mean_cov_5.72916666667**

AAATAAATGTATAGCTATACAGGAGGAAGAATGTGGTAGCAGGAGAGTACAGTAGTTTCTCATTATTTGTGGTTTCACTTTTTGAGGTT
 >chr20:58448441-58448723 - E=5e-158
TCAGTTACCTACAGTCAACTGTGGTCTGATAATATTAAATAAGAAATTGCAGAAATAAACAATTCATATGTTTTACATTGTGTGTAATT

CTGAATAGTGTGATGAAATATTGAGCCATCCACTCTGTCCCTCCTGGGACGTGAATCAACCCTTTGTCCAGAGTATCCATGCTGCTGTA

TACCCTACCTGC|CTG|GAGCATAGAAACTGTACTAGCAGGGATCCTTATCTACAGGTTTTGGTCATCAAAGTAATAATCCACTTGCCT
 >chr20:58444980-58445277 - E=4e-167
AAGGATTTTTTATTTTTAGTTATGAATTGGAATTGAATTTTTGCAGTGAATTAGTAGTTTTGCAGTTTTGCTTTAATGTTTCTTATGTT

CAACTCTTTTTGAAGTGGGGGGCTTTGAACAATTTTGTAACTTCTTATTGGGTTTTTGTATGTCTTCATTCATAGCCCAGACATACTCC

AACTAAGAGTAATACTATTGTAAATAGAAAAAAAATAAGTTCTC
