# Supplementary material for: Chromothripsis during telomere crisis is independent of NHEJ, and consistent with a replicative origin
Source: HighWire-hosted journal article supplement (doi:10.1101/gr.240705.118), 2019-03-14
Supplement: Supplemental_file_1.zip [file contig.2.DB45_length_586_mean_cov_5.11945392491.docx]

**DB45_length_586_mean_cov_5.11945392491**

ATCACATTACACCTATAAATTGGTACAAGAATACTGTGTGATTATGATTAATTAAAATCTATAAAAGTTCTAGTTATTGTTATGTTATT
 >chr5:144142576-144142856 - E=8e-154
AATTAGTTTAATGAAGCATTAATATAAATTGAAAATATGATACTAGTAAGGTTTTAATTTTAGAAATCAATATCTCATTAGGAAGTTAC

TGCTGTATCTATAGGCATCACTAGATTAATCTCCTAGTGTAAAGGAAGCAACACCCCAAATAGCAGAAAGTACTTAGATTCATGAAGCA

TATTTATTTTTAA|CATTTCTAACAGTTATTCTAAGGACATTTAAATATTTCTGAAAATTGATAAATAATAATATTGTGATGGATGACA
 >chr5:144141306-144141615 - E=5e-167
TTTATTGAATGCCAATTAAGCTCCAAGCATTGCATTAAGTGTCTTAACTGCTTTAGCACATTTAACCTTTGCAATAACTTTATTCCAGT

AAATCCTAAATCCTATTATTAGATTGGGGGATGGGAGGTGGGGGAGGAGAGAGAGAGAGACTCAGATAGATTTAAGTAAGGTGTCCATG

TTCACACAGCTGTTTTTTTTTATTCCAAACACTGATATCGTAATTGCTATGTT
