# Supplementary material for: Chromothripsis during telomere crisis is independent of NHEJ, and consistent with a replicative origin
Source: HighWire-hosted journal article supplement (doi:10.1101/gr.240705.118), 2019-03-14
Supplement: Supplemental_file_1.zip [file contig.2.DB45_length_672_mean_cov_8.89136904762.docx]

**DB45_length_672_mean_cov_8.89136904762**

GGCTCTGCACCATGGGCCTAACCTCTATCGCAGGCATTCTCTGGGCTCCCTTGTTTGCTGGCTTTCTGTTGTATTAGCCAGGGGAAGGA
 >chr3:61182412-61182666 - E=5e-141
ACTGGATGAAGACCTGGGAACACGAGGTTGAAATATTCTTCCCTACTTTCTTCCCTGCAGCATTGTGGGTTGGCAATGGCTGTATCCCT

CTAAGGAAGGCCACAGTTCCGGTTGGGGGCCTCTCTTCAGCGGCTACAGCTTTTTCTACTGTCTGGTAACTGCCTC|AGTGC|CTCAGT
 >chr3
GCTCAATGTTGCCCAGGCTGAAGTGCAGTGGCATGATCTCGGCTCGCTACAACCTCCACCTCCCAGCCGCCTGCCTTGGCCTCCCAAAG
:61379370-61379783 - E=9e-237
TGCCGAGATTGCAGCCTCTGCCAGGCTGCCACCCTGTCTAGGAAGTGAGGAGAGTCTCTGCCTGGCCGCCCATCCTCTGGGATGTGAGG

AGCCCTTCTGCCCAGCCGCCCAGTCTGGGAAATGAGGAGCGCCTCTAGGCGCTCACCTCCCATCTAGGAAGTGAGGAGCGTCTCTGCCC

GGCTGCCCATGGTCTGGGATGTGGGGAGTGCCTCTGCCCCGCCGCACTGTCTGAGATGTGAAGAGCGCCTCTGCCCGGCGGTGACCCCA

TCTGGGAACTGAGTAGTGTCTCTGCCCTGCCGCCACCCCGTCTGGGAGGTG
