# Supplementary material for: Chromothripsis during telomere crisis is independent of NHEJ, and consistent with a replicative origin
Source: HighWire-hosted journal article supplement (doi:10.1101/gr.240705.118), 2019-03-14
Supplement: Supplemental_file_1.zip [file contig.2.DB45_length_680_mean_cov_11.5529411765.docx]

**DB45_length_680_mean_cov_11.5529411765**

CACGTTCTTGACTGGGACAAAAAGCCAAAAATTAGGAACCAAAAAAGTCATTGAAAAAGAGAAGTTAAAATAGGGAGCTCTAGAAAATG
 >chr8:139039964-139040284 + E=9e-181
CTCATAAACAGAGTGGGGTGCTGACTGCCTCAGTAGAGAAAAGGCTGATAACTGTATCAGGCTAGCCAAACAGGAGAACATTAGGATAG

AGCATTGTCACCAAGGATAATTTAGAAAGTATAAGACAAATCAAGCCAGTGGCGTTATCCCAACATTATAAAGGCAAAGTCCATTTTAG

AAGCAGCCTAATTCCTGAAACTTACACTTCTTTCCTGAAAGCTGTCACTGTCT|ACTA|CATAAGTAGTATTATGTGGAAAGTCTTTCA
 >chr8:138844650-138845006 - E
AAAGTATTAAGTTCAGATTTAAAAACATTTAGGATTGCCTGCTTGCTGACCAGCCCCAGGATAGGATGCTGGGGTTACAAAGGATAATA
=2e-202
AAACATGGGTTCTATTCTCTAGCAGCTTATGACCTGCTATGAAAGTATCACCAACAGGTTAGAGTCTGTTAAGTGTTAAGAGAAAGGTA

AACATGGTTCTATGGGAATTCCAAATGGCCCAGTTTCAAGTTTGAGGGTTATAAAGTTTGCCCCAGGAATCTCTCATGAATTCCATGTG

AATTAGACAAGACCTTGTGTATGGAAGTGTTTTATAAATATGTGATGAGAGACATAGCT
