# Supplementary material for: Chromothripsis during telomere crisis is independent of NHEJ, and consistent with a replicative origin
Source: HighWire-hosted journal article supplement (doi:10.1101/gr.240705.118), 2019-03-14
Supplement: Supplemental_file_1.zip [file contig.2.DB45_length_694_mean_cov_6.08645533141.docx]

**DB45_length_694_mean_cov_6.08645533141**

TGTGCCACGTTGGTGTGCTGCACCCAGTAACTCGTCATTTAACATTAGGTATATCTCCTAATGCTATCCCTCCCCACTCCTCCCACCCC
 >chr3:105344338-105344710 - E=5e-138
ACAGCAGGCCCTGGTGTGTGATGTTCCCCTTCCTGTGTCCATGTGTTCTCATTGTTCAGCTCCCACTTATGAGTGAGAATATGCGGTGT

GTGGTTTTCGGTTCCTGTGTTAGTTTGCTGAGAATGACGGTTTCCACCTTCATCCATGTCCCTGCAAAGGACATGAACTCATCCCTTTT

ATGGCTGCATAGTATTCCATGGTGTATTTGTGCCACATTTTCTTAATCCAGTCTATCATTGTTGGACATTTGGGTTGGTTCCAAGTCTT

TGCTATTGTG|AATAG|AATGGATGTTCAAAGCTTGCAAAATTTTCCAAAAATTTTATACCAAATAAATAGTTGCATAATACCCAAACT
 >chr2:193855880-193856208 + E=1e-179
AATTTCCCTAGATTACCAATAGCTTTTCTACCCCTTCATTCAGACATGAAATGAAAGAAAAGAAAGGTAAAATTATTAAACAGTTTCAA

ACACAAAATACCTGGTTTACTTTCAGGTAGAATTATAAACATAAATATTTTTATGACTATAATGTGACATTTCCTCTTACTTTAGAGTA

GAATAAAAAATACAACCTTCCCCAGCTGAACTAGTGAAGTTAAATGCATGTCAATACTGTCCTCCTAGCTGAA
