# Supplementary material for: Chromothripsis during telomere crisis is independent of NHEJ, and consistent with a replicative origin
Source: HighWire-hosted journal article supplement (doi:10.1101/gr.240705.118), 2019-03-14
Supplement: Supplemental_file_1.zip [file contig.2.DB45_length_725_mean_cov_8.19862068966.docx]

**DB45_length_725_mean_cov_8.19862068966**

TTCTAGTAATTTTATAGTTTCAATTCTTACATGTCAGTCTTTCATCAATTTTGAGTTAATAATTCTTTTAGCCATTTCGAGTAAGATAA
 >chr13:65808580-65808897 + E=6e-179
GAGCCTAATATTATTTTTCTGCATGCTGACATCATTTTCCCCAGCACCATTTATTAAAGAGACTGTCCTTTCCACAATGTGTGTATTTG

ATGCCTTTGTCAAAAATAAGTTTTCTGTAAGTACATGGTGTAATTTCTGGATTCTCAATTCTATTCCATTGTGCTATGTGTCTTTTTTT

ATGCCATTACCGTGCTGTTTTGGTTACTATAACCCTGTAGTACA|TTTTGA|GAACTGTCTATTCAGGTCCTTAGCCCACTTTTTGATG
 >chr13:65810017-65810431 + E=3e-237
GGATTATTTGGATTTTTCTTGCTGATTTGTTTTGAGTTTCTTGTAGATTCTGGATATTAGTCCTTTGTTGGATGCATAGTTTGCAAAAA

TGTTCTCCTACTCTGTGGGTTGTCTGTTGACTCTGCTCATTATTTCTTTTGCTGTGCAGAAGCTTTTTAGTTTAATTAAGTCCCTTTGT

TTTTGTTGCATTTGCTTTGGGTTCTTGGTCATGAACTCTTTGTGTCTTTAACTTTTCCTCAATGTTTTACAGTTTTCAGCATAGAGAAC

TTTCCACTTCCTTCATTAAATTTATGCCTATGTATTTTATTTTTTGTAGATTTTGTAAATGGCATTTTTTTTCTTTTTCAGGTAGTTTA

CTACTAGTGTATTAA
