# Supplementary material for: Chromothripsis during telomere crisis is independent of NHEJ, and consistent with a replicative origin
Source: HighWire-hosted journal article supplement (doi:10.1101/gr.240705.118), 2019-03-14
Supplement: Supplemental_file_1.zip [file contig.2.DB45_length_764_mean_cov_10.5366492147.docx]

**DB45_length_764_mean_cov_10.5366492147**

TCCAGTTCTAAAGGTCCTGATACATTACCTGGAGTCAACTGTCTCATTTAAACTGTCTTCAGTACAGCTCGGCACAGTTCATCAGTTAA
 >chr2:134790766-134791195 - E=3e-246 p=1e-02
TCAGGCCCTGGGTTGAACAGTGGGTAGGACCCAAGGCTGTGCTCTCAGGAGGTGGGGAAAGCTATTGCACCTCTTTTTTGAACGCGGAT

TTGAATTTTGGAAGATACAAGTAAGTTTCTAATTTGGAGAGTAGGGTGGTATGTACCTTGCAGAGAAAACCTTCTAGGTAGAAGGATTT

TAAAATGTGTCCCAGAAGATTGGTGAATCAGGTCCAAAATCCTGGGTTGGCAGCAGTTTCATATGTTATTAAATCTTGACTTTAGAGTT

GAAAGGAATTTCCCACTGGAAAAAACATAACAAAAGCTGAAAACTTGGCACTTGACTAGAAAATCAAGAAGAG|AT|GCCCCTGATGCC
 >chr2:13478
ATTCCACTGAGGCCGAGGGTCCCAGCTGCTTCCCCACTCTGGACCCTTGAAGCAGCACAGGATGCTCCATGGACCGCTGGTCAGCTGTC
9259-134789592 - E=2e-188
TGTTTCTAACTTGGAATTGTTTGCCTCTACTAAATCAGCCACTCTGTGCGCAATCTGGACAAGTTGTTTACCTTCTGAGCTTTCAGGTT

TTTTTGCCTGCAAAATGAGGGAGTTAGTTGGTCAGACCCAGTGGATGGCAGCTCTGGCTGTGGGTGAAACCACAGGTGAAACTCACCTG

GGAGGATTTAACCTGAATAGGGAAGTAGGTGCTGTAGCAAACATTTTTCAGGGC
