# Supplementary material for: Chromothripsis during telomere crisis is independent of NHEJ, and consistent with a replicative origin
Source: HighWire-hosted journal article supplement (doi:10.1101/gr.240705.118), 2019-03-14
Supplement: Supplemental_file_1.zip [file contig.2.DB45_length_770_mean_cov_7.25324675325.docx]

**DB45_length_770_mean_cov_7.25324675325**

TGTAAGAAGACAGTGGATATGTACATTTAGCTTAAATTAAGTGGAATTGTACCATAGTTTCACATTACTTTTATTGTGTGAGTATGAGA
 >chr3:61581923-61582218 + E=3e-157
CAACATACATATTCATTTATAAAAACAACAGGAATTTTTGCAAGAGAAAAACAGATTTCACTAGTGGTTTTCAAAACACAGAATCTGTT

TCAATTCGGATGGATTTGTTGTTGTTGTTGTTGAAGCACAGTATATGAAACACGTAGCATGACCTCTTTATTTGACAAATAACTGGGGC

AGTGTAGGGCAAGACACTTGCTATCTGAG|GC|AATATCTACAAGGGACTTGTATCTTTCAGACTTTTCAGTAAACAAGTTTCCAACAT
 >chr3:61431231-61431705 + E=2e-273
GGCAAATTTTCATGTAGGCGTCAGCAGAGATATTTTCTATGAATGCCTAAAATAATCATCACTTTTTCCATGTAGATATTTTCTATGAA

TACCTAAAATAATCATCATTTTAAGCATATTAAATATTATCTTGGAGAGTGTTACAGCTTACACTCAACTAAAGGCCTAGAATGTAGGT

TATAATAAAAATTTTATTAATAAATAAATGAATGAATCATGCCACCGGTTATTGCCTTTACTGTTAACATCCGGGACAACTTTTACTTC

TCTTTATAATCTCCATTGATTCATAACTTCTCTTGGTTCCCTTATCTGTAAAATGGGAGTAGTAATCGTGCCTCATGATTGATTCAGTG

CCGCATTACTGAATCATTGTGAGGATTCAGTAATGTAGCCTATGGAAAGCACCTAACACC
