# Supplementary material for: Chromothripsis during telomere crisis is independent of NHEJ, and consistent with a replicative origin
Source: HighWire-hosted journal article supplement (doi:10.1101/gr.240705.118), 2019-03-14
Supplement: Supplemental_file_1.zip [file contig.2.DB45_length_940_mean_cov_4.58085106383.docx]

**DB45_length_940_mean_cov_4.58085106383**

CCAGGCCGGGCTGAGAACTCCCTATAGCAGTAAATCCTGCTGGTGCTCGAGTTGCCTCAAGGAAAGGGTTACTGCCTGGCTTCCCATGG
 >chr22:39823458-39823825 - E=8e-206
ATGCTTTAATTCAGAGGATAAGTTTGCTCCCAGTTGAGGCTGACCCAATAAAAATATGGTTGCAATAAAAACAGGCCAGAGAAACTCCA

ATAACCCTGGTGTCCATGGGAGAACAAATCTGTCTGTGGATGCCTGAGCTTTATCTAAGATTTGCTTGTTTAAAGCAAAGAAAAAGAAA

TGCAGCCCTCAGGAACCGAAGGTCTTAGTGCTGAGCAGCACTGGGGGGAGCACGGGAAAGAGCAGCCACCTCTTTTCCTGAGAACTTGG

TTGAAGAATGA|AG|CTGAAAACTGTGCTTCAGAAAGAAGGAAACTGAATCTACACAAAAGAAATGAAATACAAGGAACAACAGTGAGC
 >chr11:94215636-94216207 + E=0e+00
AAAGAAATAGGTAAACATGTATATAGGGTGGGGAAACAGTTTTCAAAACAGAATGCAATTTAAAAATAAGATGAAAGAAAGAAAATACT

GAAGTTAAAAAATGTCCCGGCTGGGTGTGGTGGCTCACGCCTATAATCTCAACACTTTCGGAGGCCAAGTCGGGAGGATCACTTGAGGT

CAGGAGTTCAAGACCAGCCTCACCAACCTGGTGAAACCCCGTCTCTACTAAAAACGCATAAAAAAATTAGCTGGGCATGGTGGTGCACA

CTTGTAGTCCCAGCTACTCAGGAGGCTGAGGCAGAAGAACTGCTTGAACCTGGGAGGTGGAGGTTGCAGTGAGCCAAGATCGTGCCTCT

GCACTCCAGCTTGGGTGACAGTAAGACTCCTTCTCAAAAATAAAAAATAAAAAATAAAAAATGTGCCAAGTTTTAGATTTGAATAGAAG

GAGGGTAAAGACATTGATCACAATTTTGAAAAACAAGGACAAAGTATTATAC
