# Supplementary material for: Chromothripsis during telomere crisis is independent of NHEJ, and consistent with a replicative origin
Source: HighWire-hosted journal article supplement (doi:10.1101/gr.240705.118), 2019-03-14
Supplement: Supplemental_file_1.zip [file contig.2.DB46_length_351_mean_cov_4.56125356125.docx]

**DB46_length_351_mean_cov_4.56125356125**

ATTTCTTCACCGTTGGAAACTTTTCTAAGGGCAAATCAACTCCAGTTGAGTGCAACTTAAACTCTCAGCGTGATGTTTACTGGGTGTCC
 >chr18:55033762-55033992 - E=2e-122
CCTGGTGGGGTAGAGACCTTGGAACCTCAGTGCCTTTCCAGATATGTAGAGCCAAGTGAGCTTACTGGGTGCCTTGTTCTTCCCCTGCT

CCTTTGCAGGCACTGTTTTGTGGGTACCTGTATTTTTTTTTTATTGTGTCAG|AA|AATACCTTATTGAAGAAAAAGGCCACAAACACT
 >chr18:54986760-54986881 + E=2e-61
AGCTTATTCATGATACTATCTCCAGATGACCTTAAAGAGATCCAATAACTCCAAAACCATGAACTTTAGAGGCTCTGATGCAACTA
