# Supplementary material for: Chromothripsis during telomere crisis is independent of NHEJ, and consistent with a replicative origin
Source: HighWire-hosted journal article supplement (doi:10.1101/gr.240705.118), 2019-03-14
Supplement: Supplemental_file_1.zip [file contig.2.DB46_length_351_mean_cov_5.82336182336.docx]

**DB46_length_351_mean_cov_5.82336182336**

TGTATTGTTAATCACTTTTTTGGTCCCAAGAATAATATAATCACACAATCTCCTACTGTAGCCTTTTCTGTGTCCACTTTCTTTTCTCA
 >chr20:13411646-13411761 - E=8e-58
AAATTGTAAATAATGTTCTCATT|ACA|TTAGCCTATGTTCGCCAGGTTTTAGTAGATAAGCTTCATAAGCATCAACGCCTCCAGTTAA
 >chr20:13413210-13413449 + E=1e-132
TGAACGGCAAGGTTTCACTTATTTCATAAACTGGCACTTCACACTTAATGCTTCCTCTTGAAATAAAGAGTAGGAACCAGTTTATAAAT

CACTACATTGGTAATAAAAACTATATAACGTGAGCTAAAATACTATGACTTATCCTTAAATATGCATTTCTGTACCACCAAAAATG
