# Supplementary material for: Chromothripsis during telomere crisis is independent of NHEJ, and consistent with a replicative origin
Source: HighWire-hosted journal article supplement (doi:10.1101/gr.240705.118), 2019-03-14
Supplement: Supplemental_file_1.zip [file contig.2.DB46_length_375_mean_cov_3.6.docx]

**DB46_length_375_mean_cov_3.6**

CCTGAGCTAACCATGCACTCTTGTTTCCCTTTTGCCAGTTTTATCACATAGTGGATGTTCTGTAGCCAAATGAAAAACATTTTAACAAT
 >chr18:56533945-56534069 - E=3e-63
AAAACCCTTGCATACTTGACGTCCTTCACTGCAGA|CG|TCCATGTTAAAGAACACTGGAGCCAGGGTGTTTGGAACTCTCAGCGCAAC
 >chr18:56535029-56535278 + E=1e-138
CTGGTTCAGGAGCACACACGCTCTCTTTTTCTTCTGTTCTTTTCTCTCAGCGATTCCCTGCCCCCACCCACCTTGACTCATTTTAAGGA

AGGTCTAGGAAGGAGGTTGCCAACTTGTCAGTAGAATCTTCTGATGCCTTTGACTGTGAGTTAGAATTTTAGGGTTTGTGTTCTCCCAT

CTCCCATTTATTTCTTCTCTT
