# Supplementary material for: Chromothripsis during telomere crisis is independent of NHEJ, and consistent with a replicative origin
Source: HighWire-hosted journal article supplement (doi:10.1101/gr.240705.118), 2019-03-14
Supplement: Supplemental_file_1.zip [file contig.2.DB46_length_381_mean_cov_4.51181102362.docx]

**DB46_length_381_mean_cov_4.51181102362**

AACCCATACTGATGCCAGGCCTTATGTATATTATGATAGGACTAAAGTTGACTTTCTGTTTCTTTATGTTCATAGTCAACGTAGGCCAT
 >chr1:21987796-21988001 - E=5e-112
CATTCATTCATTGAACATTTATGGAGTGCTCACTAAAACAAGGAGACTATAGAGCTGATCAGGGTTGAGGGTCAGAGATTAGGTCATGA

GGCAGGGAGTCTCAGACACTGCTAAGC|AGCAGG|GCTGAGTTGGAACCCACTCTGTCCAGCCCTCTTGAGCCTGTGCCCTTCCTCACT
 >chr1:21986662-21986832 - E=7e-91
GGCTCACACTGCCCTGCTCTGTATCCAGGCTGTGTAGTTATGCATTTAGAGCCCTGGTTCCTGGAAGGCAGGGCTTCAGCCAAGCAACG

GGTTATTAAGCACCTACTGTGTGTCTT
