# Supplementary material for: Chromothripsis during telomere crisis is independent of NHEJ, and consistent with a replicative origin
Source: HighWire-hosted journal article supplement (doi:10.1101/gr.240705.118), 2019-03-14
Supplement: Supplemental_file_1.zip [file contig.2.DB46_length_381_mean_cov_4.72440944882.docx]

**DB46_length_381_mean_cov_4.72440944882**

TATTATTTTATAAGGATACATATATATATATATATATATATATATATATATATACTATATATAT|ATA|CTTTCCCATGCTATTCTCAT
 >chr14:86785504-86785567 + E=3e-22 >chr14:86786651-867
GATAGTGAATAAGTCTCAAAAGATCTGATGACTTCATAAAGGGGAGTTTCCCTGCACAAATTCTCTTCTTTTGTCTGCCACCATATGAG
86965 - E=6e-178
ACGTGCCTTTCACCTTGTGCCATGATTGTGAGGCCTCCCCAGCCAGGTGGACCATGAGTTCATTAAACCTCTTTCTTTTGTAAATTTCC

CAGTCTTGGGTATGTCTTTATCAGCATCCTGAAAACAGATTAATACACATTAATATGTCATTCAAATGAATGTAGGGTTAAGTTGTTCA

ATTCATTGGATAATTACCAACTCTATA
