# Supplementary material for: Chromothripsis during telomere crisis is independent of NHEJ, and consistent with a replicative origin
Source: HighWire-hosted journal article supplement (doi:10.1101/gr.240705.118), 2019-03-14
Supplement: Supplemental_file_1.zip [file contig.2.DB46_length_453_mean_cov_3.86975717439.docx]

**DB46_length_453_mean_cov_3.86975717439**

AGACACAGAATATATATGTGTATATTTATGTATATATATGTGTGTGTGTATATGTGTGTGTGTTTATATTTATATATATATATAAACCT
 >chr14:86785200-86785567 + E=2e-202
AAACTGCATCATAGCATTTGACAGTGTAATTTGAAAGAAAAAAAAAAACTCTGTATTTCCGTGATAGTGAAATATCTAAATTAACTATA

AGATGGTAATGCTATATGATGTTCCATATGTCAATTATAAATAGACAAATTGGTTTTAGTTATATATTAAGGGAAGTATTTTATGCATA

TGCTTCAAAACTATTTACATAAAAAGTTACCGAATTGTATTATTTTATAAGGATACATATATATATATGTATATATATATATATATATA

TACTATATATAT|ATA|CTTTCGCATGCTATTCTAATGATATGGAATAAGTCTCAAAAGATCTGATGACGTCATAAAGGGGAGATTCAC
 >chr14:86786883-86786965 - E=1e-16
TGCACAAATT
