# Supplementary material for: Chromothripsis during telomere crisis is independent of NHEJ, and consistent with a replicative origin
Source: HighWire-hosted journal article supplement (doi:10.1101/gr.240705.118), 2019-03-14
Supplement: Supplemental_file_1.zip [file contig.2.DB46_length_470_mean_cov_8.87021276596.docx]

**DB46_length_470_mean_cov_8.87021276596**

AAGGGCAAGAGAATAGGAACATGTGCACACATGTGAGAATAGGAACATGTGAGGGAAAGAGAGACAGAACTAGATGCCTTAAGCCCTTT
 >chr14:86615102-86615338 + E=1e-122
TGTAATCAGCATTAATCCATCAAAGGTGGCTGAGCCCACATGACCTCAACACCTCTCAATAGACCCCACTTCTCAGCACTATTGCATTG

GGGATTATGTTTTATGTTTTCAACACATGCTTTAGGGAGGACACATTCAAACCATAGCAAG|GCCT|CTGAAACATACCCCTGTGTTCC
 >chr14:86619159-86619379
TTATCTCTGAGGCTTTGTACTCTGCTCAGTTTCACGAGGTATAATTGTCTGTGATCTGTAGGATGCTAATTTAAATATCACCTACTTAT
+ E=8e-118
GGAGGTTTTATCCATTCACTCAGATGCTCTATTCCAGGACTTTTCTATTTAGAACTAACTCATTAGCTGATACTATTTAATCCATTTAA

TAGTGCCATCTTTCTT|CAAAATGAGGG
