# Supplementary material for: Chromothripsis during telomere crisis is independent of NHEJ, and consistent with a replicative origin
Source: HighWire-hosted journal article supplement (doi:10.1101/gr.240705.118), 2019-03-14
Supplement: Supplemental_file_1.zip [file contig.2.DB46_length_479_mean_cov_5.63674321503.docx]

**DB46_length_479_mean_cov_5.63674321503**

GCCAGGCGTAGTGGCGGGCA|CCTGTAATCCCAGCTACTCGGGAGGCTGAGGCAGGAGAATTGCTCGAACCTGGGAGACGGAGGTTGCA
 >chr5:162348483-162348818 - E=5e-160
GTGAGCCGAGATTGAGCCATTGCACTCCAGCCTGGGCAATGAGCAAAACTCTGTCTCAAAAACAAACAAACAAAAATCACAAGATTCAA

CTCTATGCTGTCTACAAGTAACTAATTTTAGATTTTAAGACACACACTCTGGTTGTTAAAGGATGGAGAAGATATCCCATGAAATGAGA

ACAACAACAGCATAAAGGAGCAGAATGGCTATACTTATATCACACAAAACAGATTTTCAATCAAAACTGTCACAATACACAAAGGGAA|

A|ACTAAAAAGTGCAGCAAAAACTAAGGCCAAAATTAGCACATGAGAGAAAATAATAAAGACTAGAGCAGAAACAGACAAATGAGACTA
>chr5:162347675-162347800 - E=1e-60
GAGAAACAATAGAAAAATCAATGACACTAAGAGTTGG
