# Supplementary material for: Chromothripsis during telomere crisis is independent of NHEJ, and consistent with a replicative origin
Source: HighWire-hosted journal article supplement (doi:10.1101/gr.240705.118), 2019-03-14
Supplement: Supplemental_file_1.zip [file contig.2.DB46_length_502_mean_cov_5.61354581673.docx]

**DB46_length_502_mean_cov_5.61354581673**

TGGCTTTTGGGAGCAGGTGGCTTTTGGTTACATGGAAAAGCTCTTCAGTGGCGATTTCTAAGATTTTGGTGAACCCGTCACTTGAGCAG
 >chr14:86627636-86627857 - E=2e-121
TGTACATTGTACCCAGCGTGTAGTCTTTTATCCCTCACTTCCCTCCCAAACTTCCTCTCAATTCCCCAAAATCCATCATATCATTCTTA

TGCCTTTGTGTCCTCATAGCTTAGGCCCCACTTATAAG|GGAAA|CAGCAAAACAACTCATTAACATTTTAATAATCTATGTTTTAATG
 >chr14:86607036-86607287 + E=2e-109
AAACCTGCAAAGGTAAGAGGAATATGCACATGTGGTCATATAAATGAAAAATACAAAAACCAGTAGAGTTATTATATTTTCTTACTGCC

AGGGCTGCCTTGCAGCCAGGGTAGCTAAGATAATGTCCATCTTGAGAACCCAAGGTCTTTTTTTTTTTTTTTTTTTTCATGTAAATATT

TACTGTTATCATTTTTGTATTCTT|TTACGATCCTGTTTTTTTTTTGTATCTAATTTTAT
