# Supplementary material for: Chromothripsis during telomere crisis is independent of NHEJ, and consistent with a replicative origin
Source: HighWire-hosted journal article supplement (doi:10.1101/gr.240705.118), 2019-03-14
Supplement: Supplemental_file_1.zip [file contig.2.DB46_length_526_mean_cov_3.91634980989.docx]

**DB46_length_526_mean_cov_3.91634980989**

ATGCTACCTCTATAAAGGACCAAAATAGTATTTTTAAAAGAATTTATCAAAGTAACTATAATAAAAGTATTTAATGGTATTTGTATTGC
 >chr14:86102560-86102722 + E=7e-86
AAACATTGAAATTCTACCTGGCAGTTTAAAGAACATCACTAACATTGCCTAAATGTAGGAAAATCAAAGGT|GA|CAGAGCGAGACACT
 >chr14:86105858
GTCTCAAAAAAAAAAAGAAAAAAAAAAATAAAGAATTTCTGCTAGTGAAGCACCATGGTGCGGTGAGGGAAAACAGCCTGATTTGAAAT
-86106231 - E=7e-195
CCTAAGCCCTGTGTTTTCAAAGCTCATTCCATCACTTATTGTAAGAGCTTAGCCAGTCCTTTCTGGGGGCTTCAGTGTTACCATCTTTA

AAATGGGTAATGCACATAATAATATCAATAGTCTATAAATATAAATTCTACTAACACACACTCTAATTTTAGCCAAACTCATGAGAGAA

AATTCAGCAGCTATACAAGAAGATTGAGATAAATCAATCATTGCTACCATCATTTGGGCTCACTAAAAAGTAGCAGAAAATGG
