# Supplementary material for: Chromothripsis during telomere crisis is independent of NHEJ, and consistent with a replicative origin
Source: HighWire-hosted journal article supplement (doi:10.1101/gr.240705.118), 2019-03-14
Supplement: Supplemental_file_1.zip [file contig.2.DB46_length_538_mean_cov_4.16728624535.docx]

**DB46_length_538_mean_cov_4.16728624535**

AGAGTGACCATGGGTTCCAAAGGAGGGTTAGACAGAATGCCAAACAATGGGACAAACAAGAGGAGTCTGAAGAGATTTCCTGGGAATCT
 >chr1:52434433-52434651 - E=2e-113 p=3e-02
GAATTCCACAGTGATGTGAGTAACTCCTCATATAAACAGGAACTGAGAACAAGGTCAAGGTGAGATGGGGTGCTGGGCAGTCAGCAAGG

TTCGCTTATCAGTCATCTGCCTTATGTCCACACAGCAG|CC|CAGTTACTTGAGAGGCTGAGGTGGGAGGATCACTTGAGCCTGGGAAT
 >chr1:52405060-52405382 - E=4e-176
TTGAGGCTGCAGTGAGCTGTGATCATGCACTCAGGACTGGATGACAGCGTGACATCCTGTCTCAAAACAAAAAAAGCTGGGTACACTGG

CGAGCGCCTGTAGTCCTAGCTATTCTGCAGGCTGAGGTGGGAGGATCACTTGAGCCTAGGAGTTCAAGGCTGCAGTGAGCTATGATGAT

TGTGCCACTGCTCTCTAGCTTGAGTGACAGAGTGAGACCCTGTCTAATAAAAAAAAAAAGTCCCAGATTTAAGGCCTACCTTTTTGTCA

CCAGCT
