# Supplementary material for: Chromothripsis during telomere crisis is independent of NHEJ, and consistent with a replicative origin
Source: HighWire-hosted journal article supplement (doi:10.1101/gr.240705.118), 2019-03-14
Supplement: Supplemental_file_1.zip [file contig.2.DB46_length_545_mean_cov_3.57798165138.docx]

**DB46_length_545_mean_cov_3.57798165138**

TCTGACTCCTTGTGGCCTGATGAAGTCTAAGGGTTTCAGAATAAAAGGCATGCAAACTGCTACAGATCTAGCAAGCCAATATGAAGAAA
 >chr4:112620023-112620345 + E=3e-182 p=0e+00
TAAACATTCAGCACTGAAATTCTTCACATATTAATTGATCAAACGATGCATGTAGTATCAGTGCTTGAGTACACCATCATGAAGTTCAG

TACTCCCAATTTGGAACAAATGAAGGGTAACTTTTAGTCATTATTAAATTTATTTATGGAAAAAACTAAGAAAATTCTGATTAAAATTA

GTAGAATACAAAACAATATAATAAAAAAGCAAGGGAAGCAGTGGAATTTACCTTG|GAAATGTCAA|GGGTTTGAAATTTCACTTAAAA
 >chr4:112621562-11262
AGATGACATTTTAGGGCTATTTATTTACTTTTTACTATAAAAATAACAAAGGGCCATGTTGGGAAATTACAAAACAATAAAAGACAAAA
1775 + E=2e-116
TCCCTATCATCTACAAGCTAGTGATTTTAACTTATATAGTGAGAAGACATATATAATAACTCTTGAAATATAAATGAAATAACACCTCA

TGTCATCACAGTG
