# Supplementary material for: Chromothripsis during telomere crisis is independent of NHEJ, and consistent with a replicative origin
Source: HighWire-hosted journal article supplement (doi:10.1101/gr.240705.118), 2019-03-14
Supplement: Supplemental_file_1.zip [file contig.2.DB46_length_563_mean_cov_6.8809946714.docx]

**DB46_length_563_mean_cov_6.8809946714**

CTAAAGTCTAGAGGTAGGCAGGCCCAGTTGGTTCACAGATTGAACAATGACCTCAGAGACACTGGATTTTTACCCTCTCCCATTCTGCC
 >chr5:111318252-111318488 + E=2e-127
ATCTTTATCAGATTGATTTACCACTTCAGAGTTTCCAGATAGCTACAATAGCCACAAGCATCCTCTTAGGACAGCAACCAAGACAGAAG

AAATGGAAAGGGCAAAACAGATATTTTCTTATGAAATTCTTTATCATGAAAAAAAA|GT|GTTGAGGGAGGGTAGGAATGTAGGAAAGA
 >chr5:111319108-111319437 + E=
AAGGAGTGCTAAGGATACAATTAGTTCAATATTGGGCATATTGAAAGTAAAGTGTCTGTTATTTCAAGGTTGAGGTATCTAAAAGACTT
2e-186
ACCAGTCTAGAGTTCAGAAAAGAAGTAAACTGCATTCTTTCTAGGACATTTTTTAGAACAGGTGGCTACTAAGAATTTCCCCAGGAAAT

TGGCTTAAACTGGAAATGTCCCAAGAAACTACTATCTATGGGGATGATGAAATCATGAATCGGAGGTTGTTCTGTGAGATGCTTAAAAT

ACAAAGAAAAGTAAATATCTGCACCTTGAGA
