# Supplementary material for: Chromothripsis during telomere crisis is independent of NHEJ, and consistent with a replicative origin
Source: HighWire-hosted journal article supplement (doi:10.1101/gr.240705.118), 2019-03-14
Supplement: Supplemental_file_1.zip [file contig.2.DB46_length_567_mean_cov_5.29100529101.docx]

**DB46_length_567_mean_cov_5.29100529101**

TTATTCCGGAACTTTTGAAAACAACCCTTCTACAATGCTGTACTCACAACTAACACAGTTCGTTTTCAAAAGTATAGTAAGGAAAACAA
 >chrX:136704939-136705115 - E=3e-94
CATTTTCTATGTATATAGCTGCAGGAAAAAAACTGAAAATATTACACTGCATGAATACATCACATACCAAAGTTTGCAACCAAA|CTG|
 >ch
TCATCCAGGCTAGAGTTCAGTGGCATGATCTCGGCCCACCACAACCTCAGCTCCCAGGCTCAAGCAATCCTCTCACCTCAGCCTCCCAA
rX:136703548-136703942 - E=1e-222
GGAGCTGTGACCACAGGCATGTGCCACCATGCCTGGCTAATTTTTTGTAGAGATGGGGTTTTGCTATGTTGGACAGACTGGTCTTGAAT

TCCTGGGCTCAAGTGATCTGACCACCTCGGCCTCCCAAAATGCTGGAAATACAGGCAGGAGCCACTGCACCCAGCCCCAATCAAATATT

AAATGTTGATGTATTTCTCATTGTATTTACTACTTGAGTCATTCAATAAGATAATATAAGAACATCTTTGGTTTCATATGCCTGATCTA

CGTTAGAATTTTGCAGCTTTGAGAACACTACAAAT
