# Supplementary material for: Chromothripsis during telomere crisis is independent of NHEJ, and consistent with a replicative origin
Source: HighWire-hosted journal article supplement (doi:10.1101/gr.240705.118), 2019-03-14
Supplement: Supplemental_file_1.zip [file contig.2.DB46_length_619_mean_cov_9.99192245557.docx]

**DB46_length_619_mean_cov_9.99192245557**

AGAAGGATTATAGGGTGGAGGAGCAGAGGCCAAGGAAGAATCGGAGCCTGATTTAGCTTGGCGGGGAGCGACCTGAAGAGGAGCAGTCT
 >chr20:1712730-1713057 + E=5e-182
GGGGAGGAGGGGAGAGGTCACATGGGTCAGTAGGAAAGGAAGATTGAAAAGACTCAGCGATGCTTGCGGTTGGGACTGAGGGAACAGGT

GGGGGGGAAAGAAGGAGGATTTGGGGTGAGTCACATTGGGAACAGAGACTAGGGAGGGACCGATGTGTAAAAGAATGCCTGGATGTCAG

GCACCTCAGACCATTTGCCCATTTTATGACAAGAATTATCTAGATCTTGTAGGATGGAGA|TCCTA|CATAATTCTTCATGAAAACACA
 >chr20:1710401-171068
CATGCTCTCCCTGCTGAGCATGTCCAGCTAAACTTTCAAACCCCAACCCCTTCTACAAAACAACAACTCCTTTCCTTCCTGGGCATGGT
8 - E=5e-161
TGGATAGTTTCACCTTTGGATACCTAGTTTTACCATCCTGACTAAACCATTATACAAACTCACAAAAACAAACCTAGCTGACCCCATAG

ATCCTAAATCCTTTCACCACTCATCTTTCCGTTCCTTAAAAACAGCCCTAGAAGCTGCTCTCACACTAGCTCTCCTTAACTCATCCC
