# Supplementary material for: Chromothripsis during telomere crisis is independent of NHEJ, and consistent with a replicative origin
Source: HighWire-hosted journal article supplement (doi:10.1101/gr.240705.118), 2019-03-14
Supplement: Supplemental_file_1.zip [file contig.2.DB46_length_667_mean_cov_5.39730134933.docx]

**DB46_length_667_mean_cov_5.39730134933**

TTATTTCTCATTTATGAGTCTGTGGTTGGCAGCACTTCTTCTTGGCTCTATTCTGTGCATCTCTTATTCCAAGACCTAGGCTGAAGCAG
 >chr3:59818130-59818413 - E=2e-158 p=4e-02
AGAAGCCCTCATCGGGGCCATGCTATTCACAATGCAGAGGACAAAAATGCAGAAAGTTAAGCCTTGCAACCTCATTTAAAGATTCTATG

TAGACATGGATATTTCTTATCTGCTTATAGTCCTTTGGGCAAAGAAAGTCACATAACCAAGCCAGACAATGTGGCTGGATGTTACAGAT

AAGGTAGGGGTGT|ATT|TTACAGATAGTAGAATTACAGCATGAAATATGTGTAACTTTCCCTTGGTTACCCAGTTAGTAAGTGTCAGA
 >chr3:59706986-59707373 - E=4e-218
GCTTTCATTTGAATCCAGATGATATAAATCCAGAGTCCACAATGGTACCTTTCTGGCTGAGATGAAAACCCAAGTCAACCAAACTCTAA

AGCCCCATCTCCCTGCTGCCCTGAACTTTCTCCTATGGAAAGAACCTAGTGGGCCTCTTTCTCTCATAAAGCTACTTAAAGACTGAAGA

CTAAAGCTAAAATGTTCCCTAGCACGCTCTTTATCCCTGTGGAGATCTTGTCTTTGTGCATTCATAGAGAATCTCACAAACTAATGCAT

CCAGACATCTGGCTTCAAGGGAAGGTAGATCTACTTTGGAAGTAAG
