# Supplementary material for: Chromothripsis during telomere crisis is independent of NHEJ, and consistent with a replicative origin
Source: HighWire-hosted journal article supplement (doi:10.1101/gr.240705.118), 2019-03-14
Supplement: Supplemental_file_1.zip [file contig.2.DB46_length_701_mean_cov_9.7089871612.docx]

**DB46_length_701_mean_cov_9.7089871612**

ATTTAAATATAGGTAATTAAAATTTAAATGCAATTTGTTTTTTTTTTTAGAAGGAGTCTCACTCTGTCGCCCAGGCTGGAGTTCAGTGG
 >chr15:58934362-58934712 - E=9e-193 p=0e+00
CGCAATCTCGGCTCACTGCAGCCTCTGCCTTCCAGTTTCAAGCGATTCTCCCACCTCAGCCTCCCGAGTAGCTGGGATTACAGGCGTCC

ACTGTCATGCCCGGCTAATTTTTGTATTTTTGTAGATACAGGGTTTCACCATGTTGGCCAGGCTGGTCTTGAACTCCTGACCTCAGGTG

ATCACCCGCCTCGGCCTCCCAAAGTGCTGGGATTACAGGCGTGAGCCACTGTGACGGGCCTTACATGCAATTTTTATTT|AT|GGTTTC
 >chr15:
TGATTTTCCTATTATTATTTTTCTGATTTCTCTTAATTGATTTTAGCTGTGAAAGCACTGTCATTTGCTGTTAAATTCTAAAGTCCCTG
58926484-58926790 - E=2e-164
TTAATGAATAGATGAAGTACAAAATGATAAAAATATTTAAGTGGAAATATGGTTTTTCTTTTAAAATTTGATAGTGTCCTAAAGACATA

CTGGAACAATCATAATTCAGTTTTTAATTTTTTTTTGAAGATTTCAAACCTGCGGAAAGGTTGCAAGAATAGTATGGTGAAATTCTTCT

TCTTTTTTTTTTTTTAGACAGATTGTCACT|TTGTTGCCTGGGTTGGGTTTCTGTGGTTCAATCTTAACTCATTGTATCTT
