# Supplementary material for: Chromothripsis during telomere crisis is independent of NHEJ, and consistent with a replicative origin
Source: HighWire-hosted journal article supplement (doi:10.1101/gr.240705.118), 2019-03-14
Supplement: Supplemental_file_1.zip [file contig.2.DB46_length_711_mean_cov_4.57946554149.docx]

**DB46_length_711_mean_cov_4.57946554149**

CACAATGCCTCAAACAAACACTAAGTACAAATCACAATCAATTAGTAGTATTGAAAAAGACCTCTAAGAGTTATTGAACAAGTAATTTC
 >chr14:86048395-86048791 - E=2e-223 p=1e-02
TACCTCTTCCTTAGGGTCTCCATTCAAGCTTTCCGTCACTTTCACAGAGGTTCCTAAATTGAAACAAACCACAACTACACCCTGCATGC

ATATACAAACACATATATCATATAATCACAAGGTTGTATTTCATACGTATCAGAATAATGCTCATATGGCTACTCAACAGAATTCTATC

AACGCTCCATTTGTTTTTGCTTTACCATCAATCTACAGGATCTAAGAGCAGGATCTACATATGGATTCAACCTCCTATATCACACAGAT

TGTAGAGTGGTAGTTAACATTATGTAAGCACCTCCCA|TTG|GATTGGAATCAATAGAATGTCAAGATGCCAGGCACATTCAGCCTAAT
 >chr14:86046498-86046816 + E=2e-176
AGCAGGTGGGTGTCTGCTGGACAGTGTGCCTGGTTTGCCTGACAGTAGCAAATTTAGGCCAGAATTAATGAGCCAGGGAAGGTACTGTT

GGTGTTGCAAGATTTTTGCAGTTTTCAGAAGTAATTTTGTTTTTCCTTTTTAATGGGATTTTCAGAAGTTTTCAGAAGTAATTTTGTTT

CTCCTTTTTAATGGGATTACATTTGCAAAAGAAGTTTGTGTTCATATATGTGCGAGTGCATGCATGCCCCTTTATTATAATACCTTTAT

G
