# Supplementary material for: Chromothripsis during telomere crisis is independent of NHEJ, and consistent with a replicative origin
Source: HighWire-hosted journal article supplement (doi:10.1101/gr.240705.118), 2019-03-14
Supplement: Supplemental_file_1.zip [file contig.2.DB46_length_714_mean_cov_6.8431372549.docx]

**DB46_length_714_mean_cov_6.8431372549**

TTCTTGAAGAATATTAACAAATGGACAAAACTCTGGCCTGACTGATTTAAGAGAAAAGGGAAAAATACCAAGTACAAATCTCAAAACCG
 >chr2:15685505-15685941 + E=1e-250 p=7e-03
ATACAGGGGACGTCAGTACAGATCCTACAGACAGAAGGGTAATAGGGAATATTATAAACATTAAGCCAATAATTTCTACAATTTAGGGA

AAAATTCCACAAAAACTGAAATAAAAGGAAACCAAAATTTTAAAAAGCCTTATTAATTACTAGTATTTTAACTAAACTCAAGATTTAAA

ATTGGTTAATTAAAAGACTGCTTACAAGAAAACTCCAAGTTTCACTGGTGAATTCCATCAAACATTTAAGGAAGAAATAATTCAATTCT

ACACAAATTGTTTCAGAAAATAAAAAAGGAGGGAACACTTGCCAACCCTTTTCAAACCAGCACTACTCCAATACC|AAACC|CCGACTC
 >chr2:15686
TACTAAAAACACAAAAATTAGCTGGGCATGGTGGCAGGTGCCTATAATCCCAGCTACTTGGAGTCTGAGGCAGGAGAATCACTTGAACT
674-15686957 + E=2e-158
CGGGAGGTGGAGGTTGCAGTGAGCCTAGATGGCGCCACTGCACTCCAGCCTCAGTGACAGAGCCAGACTCCGTCTGAAAACAAAACAAA

AAAAACAAGTCTGGGTGTTTCAAATAGTCTATCCTTCCCAACCTTTTTCATGTCAACACACAGAGAAAATCATATTTGTATGGCATCTA

ACAG
