# Supplementary material for: Chromothripsis during telomere crisis is independent of NHEJ, and consistent with a replicative origin
Source: HighWire-hosted journal article supplement (doi:10.1101/gr.240705.118), 2019-03-14
Supplement: Supplemental_file_1.zip [file contig.2.DB46_length_740_mean_cov_8.17027027027.docx]

**DB46_length_740_mean_cov_8.17027027027**

GCGTTTGCATCCTCATAGCTTAGCTCCCACTTCTAAGTGAGAACATATGGTATTTGGTTTTCCATTCCTGAGTTACTTCACTTAGACTA
 >chr18:57649764-57650087 + E=2e-167
ATTACCTCCATTTCCAACCAAGTTACTGCAAAAGACTTTTTTTTTTTATTTGATTAGTATTCCATGGTTTATATATGCCACATTTTCTT

TACCCACTCATCAGATGACGTGCACTTAGATTGGCTCCATATCTTTGCAGTTGTGACTTGTAGACTGGTGCTGCAATAAACATATGTGT

ACAGGTGTCTTTTTAATGTAGTGACTTCTTTTCCTTTGGGTAGAGGCCAGCGATAT|ACCTTCTGAGCATAAAAGCAACATGCTGCTGC
 >chr18:57653044-57653461 - E=5
TTCTCTTCCGCCTTCCAAATCTCGTACATCAGTGTCTCTTCTGGACCACACTAACTATGCAGGAAACTCTGCAGGGAAGGGAATTCAGG
e-227
GAACTATCATTCCAGCTTAGCTTCATTGACTCAATACAAATCTACTACATCAAGTTTGATGATTCGGTTTTGTTTTACCTGCGGGTGAA

TCTACTCATTACTGCAAGGGAGTACCAGGAGTCTCACACAGGCAAGTGTAGCACACTCAAGACCTTTCCTTGGCCAGACGCGGTGGCTC

ATGCCTGTAATCCCAGCCCTTTGGGAGGGTGAGGCGGGCAGATCACAAGGTCGGGAGTTTGAGACAAGTCTGGCCAACATGGTGAAACT

CCATCTCTACTAAAAATACAAAAATTAGC
