# Supplementary material for: Chromothripsis during telomere crisis is independent of NHEJ, and consistent with a replicative origin
Source: HighWire-hosted journal article supplement (doi:10.1101/gr.240705.118), 2019-03-14
Supplement: Supplemental_file_1.zip [file contig.2.DB46_length_801_mean_cov_6.50436953808.docx]

**DB46_length_801_mean_cov_6.50436953808**

CGAGTGATTTGAATAGGCTATGTTTTACTGGTTTCCTTATATTACGTAAATGTCAGTGGAATACATGAAATGGGGATCATTATAGGTCT
 >chr20:16738576-16738980 + E=3e-228
CAGAACTTCAGGAATTTTTCCACATTGTGAGGAATGATGGCTCAGGCTTCTTTTGTTTGTGGGACCATGTTCAACTAACCACTTGCTTA

CCAATTCACTTATCTAAAAAATGGGTAATGCCTTTGGAGGGTAACTATCTTTGGGATAATTGTGAGCATTAAGTTAGATACTGTATGCA

AAATCACCCAACACACTACACAGTACACGGTTGTATGTAATAAATGGTAGTAAAATTAAACTTTAAAATGAGAGGGTTTTAAAACATTT

TGAAATGTTTGAAGAACTAGACTTCTTTTTAGTGAATTAGAAGTATAT|T|CAAAATGAAATGGAATAACTGAAGTAATTGTTGGAATT
 >chr20:16739846-16740242 + E=2e-217
GTCAGTAGAGTTTTACCAGAAACATTTGGGTTATTGTAGTCACCATCCCCCTACAATCCCTCCTTCCCACTCCTGAACTGCTTTTGTGA

AGACATAGTCTGTGTGAAACATATTTGAGTCACAGATGACCTAGTTCCTTGTTCACAATGAACATTGTGACTAAATTTAGCAGCAGTTT

TTGTGCAGTAAACTTTTAGAACACCATGGCGTATTTCCTAAGCTTAGAAGATGAGAGTGTCATTCTCTCTAGCATCACCCACTTCTGAC

CTCAGATAAATGGGGCCCATCACTGCTTCTAAGGTTTATTGGCTGAGGGGATGTGAATATCCTCAGGGATCAGGTTTAGTACAGGGAAA

TG
