# Supplementary material for: Chromothripsis during telomere crisis is independent of NHEJ, and consistent with a replicative origin
Source: HighWire-hosted journal article supplement (doi:10.1101/gr.240705.118), 2019-03-14
Supplement: Supplemental_file_1.zip [file contig.2.DB46_length_866_mean_cov_7.62124711316.docx]

**DB46_length_866_mean_cov_7.62124711316**

TCTATTAATCTTTTCTATTATAGCTTCTGGGTTTTGTGTGATGTTTGGAAAGGCTCTCTCTACTTCTTTGTGGTTAAAGTTCTTTAATT
 >chr12:65279662-65280101 + E=3e-252
TTTTCCTTCTACTAGTTTTATGGTTTCATTTTTTATGTTTAAATCTGACTCATTTGGAATTTACTTTTGTGTAAGTTGGGAACTAAGGT

TCCATCTTAACATTTATTTTTTCCAAATAGTTACCTAGTGGTGCCGGCACCATTTATTAATCTTTCCCCTATTGATTAAAAATGCCACC

TTTATAATCACATACTAAATCCCTGTATGTTTTAGGGTGAATATCTGGACTTTTGGAGTACAACTGAACCACTACCCTCATTCAGGTGG

GGGCAGAGAGGCCAGAGCTCTGCACACTGGTTTCCTCTCTGGTTGCCAGCATTACCCCTGAAGTTGCTTTGGGGGAGATC|TTG|TTTA
 >chr12
AAGGCTTGCCAAAAACACAAAACAAAGCCTTAAACCCCAAACCTTTAATAGTATAAAAATAACAAGGCTTAAGTCATAAACATTGGATT
:65281152-65281582 + E=1e-234
TCCAGAATTTAAAAAGATAATTTTTGAAAAAGGAATTACATCAAGAAAATTTTTTTTGAATTGACTGTCTTCTAAAACAAATTAAAAAA

ACAAAAACAAGAAAAGCAATTAAAAAAAACAGTTGCTAATGTTCAATCCGGAGAAATGGATGGATTCCAGTATTTTATTCACAAACAAG

CTTCATCCAAATGGCAGAACAACAGGGGTCTGGCTTCTGCATGGCTCAGGCCTGAGTTTCTGAACCGGAGGGTATATGGTGAGGTTGGG

ATTAAGGGTTTTCCTGCCTCATTTGGGTAGGGCCTAGTCACAGTTGCACCAGCAGTTGTGTTCACAT
