# Supplementary material for: Chromothripsis during telomere crisis is independent of NHEJ, and consistent with a replicative origin
Source: HighWire-hosted journal article supplement (doi:10.1101/gr.240705.118), 2019-03-14
Supplement: Supplemental_file_1.zip [file contig.2.DB46_length_992_mean_cov_9.22379032258.docx]

**DB46_length_992_mean_cov_9.22379032258**

AAAAATGCGTGGCTTTATGCGTGAGCTTAGTTCTTAGCTTTATACACACAATATACATATTTCTATTTTGGGTAAAGTTAAAATAACCA
 >chr18:57656441-57657019 + E=0e+00
AAATAATTAATTATTCTGGCCTTTTTATGTGGCCATTTGACTCTTTTAAGTGTGTTAAAATATTTGCTTTACAAGTAGCTGGTCTTTGC

TTATGTTTAGATAAGTACCTGTGTTATTGCCCTGTTCATTTAGTAATCTAAAATTCTAAGCCAGGGGAGCCATCACCAGGTGATATGGT

TTGGCTCGGTGTGCCCACCCAAATCTCATCTTGAATTATAATCCCCACATGTCAAAGGAGGGGCCTGGTGGGAGAGATGATTGAAAAAT

GGGGTTGGATTTCTCCCTTGCTGTTCTCATGATAGTGAGTGAATTCTCACAAGCGTTGATGGTGCTTCCCCCTTCGTGTACACTCTCTC

TCTCCTGCTGCCATGTAAGGTGTGCCTTGCCTCCCATTCCATCATCACTGTAAGTTTCCTGAGGCCTCCCCAGCCATATGGGACTGTGA

GTCAACTAAACCTTCTTTTTATAAATTACCCAGTCTCAGGTAG|T|GCCATTGCACTCTAGCCTGGGCGACAAGAATGAAACTCCATCT
 >chr18:57642994-57643371 + E=9e-209
CGGACGGGGGCGGGCAGGTGAAGAGTGCAGAGAACAATGTTTTCATTTTATAAGGCTTGTTTCTAGGACATTTTGGAATTCTTTGCTAC

TATTCCTTTGATTCTAAAATTTTTGATAATGAAGTGTTTGGATAGAACAGATGTATTGACATCAAAAATATTATTAATGTTTACTCTAA

TTTTAGAATAATTCATGTTTATTAAACACCAAAGGGATTTCCTTTCTTTTGAAATTATTTCAGATATACAAAGTACAAAAATAAGATAA

TAAACACTCATGTACCACTGCCCAGATCTTACAAATGACATTGTTGCTACATATTGGCTCAGATTT|CGGAGACAAGAAATAATACATG

CGTCAGAGTTGATCGG
