# Supplementary material for: Chromothripsis during telomere crisis is independent of NHEJ, and consistent with a replicative origin
Source: HighWire-hosted journal article supplement (doi:10.1101/gr.240705.118), 2019-03-14
Supplement: Supplemental_file_1.zip [file contig.2.DB47_length_293_mean_cov_5.08532423208.docx]

**DB47_length_293_mean_cov_5.08532423208**

TTTTCTATTTTTAGTAGAGACAGGCTTTCACCAATTTGGCCAGGCTGGTCTTGAACTCCTAACCTCAGGTGATCTACCTGCCTT|GGCC
 >chr17:40710563-40710670 - E=5e-35 p=0e+00 >ch
TCCCAAAGTGCTGGGATTA|CAGGCGTGAGCCACCAGGCCCGGCCCGTTTTTTAATTTTTCTTTATAATACTAAAATTAAATTAAATTA
r19:4885272-4885481 - E=1e-105
AATTTTAAAAAGACTGGTCCAGGGTTTGTCTTCTTGGGGGAATGGCCCTGAAATACTTCTCCAGCCACCTTCGAACTGCAAGATACTGG

TACCTCCCTCCCTCTTGCTGCAGGGTGT
