# Supplementary material for: Chromothripsis during telomere crisis is independent of NHEJ, and consistent with a replicative origin
Source: HighWire-hosted journal article supplement (doi:10.1101/gr.240705.118), 2019-03-14
Supplement: Supplemental_file_1.zip [file contig.2.DB47_length_320_mean_cov_14.78125.docx]

**DB47_length_320_mean_cov_14.78125**

CGCACAAACACACTGCCCCCATAACACTGTCCTCAAACCCCG|TTTGACAGACAAACATCCAGAACC|CAGCAGCAGTGTTCTGGAATC
 >chr2:132835124-132835195 - E=3e-13 p=0e+00
CTATGTGAGGTACAAACATTCAGAAC|ACTGCAGAAGTGTTCTGGAATCTCCTGTGAGGAAGAAACTTTTAGACCTTCATAGAAGTGGT
>chr17_gl000205_random:169063-169317 - E=9e-133
CTGGATTCCGATGTGATGGACAAACATTTAGACCCCAGCAGCAGTGTTCTGGAATCCTATGTGAGAGACAAACATTCAGAACCTCGTAG

CAGTGTTCTGGAATCCTATGTGAGGGACAAACCCTCAGAACCCAGCAACTGTATTC
