# Supplementary material for: Chromothripsis during telomere crisis is independent of NHEJ, and consistent with a replicative origin
Source: HighWire-hosted journal article supplement (doi:10.1101/gr.240705.118), 2019-03-14
Supplement: Supplemental_file_1.zip [file contig.2.DB47_length_337_mean_cov_20.0830860534.docx]

**DB47_length_337_mean_cov_20.0830860534**

AAAAAAAAAAAAAAAAAGAAAAAAAAAAAAAAAAAAAAAAAAAAAAAAAAAAAAAAAAAAAAAAAAAAAAAAAAAAAAAAAAAAAAAAA
 >chr2:33091931-33092037 - E=2e-40 p=4e-02
AAAAAAAAAAAAAAAAA|GATATTCTGAGCCACGCATG|GTGGCTCACACCTGTAATCTCAGCACTTTGGGAGACTGAGGAGGGTGGAT
 >chr19:6886202-6886413 - E=9e-116
TACGAGGTCAGGAGTTCAAGACCAGCCTGGCCAAGATGGGGAAACCCCGTCTTTACTAAAAATACAAAAAATCAGCCAGTGTGGTATGG

TGTTAGGCACCTGTAATCCCAGCTACTCCGGAGGCTGAGGCAGAGAATTGCTTGAACCCAGGAGGCGGAGGC
