# Supplementary material for: Chromothripsis during telomere crisis is independent of NHEJ, and consistent with a replicative origin
Source: HighWire-hosted journal article supplement (doi:10.1101/gr.240705.118), 2019-03-14
Supplement: Supplemental_file_1.zip [file contig.2.DB47_length_377_mean_cov_4.91777188329.docx]

**DB47_length_377_mean_cov_4.91777188329**

GCTTACTTTACAAGAGGCCATAGCACAGTGAGGAAAGATACCTGGCCTGTTTGGGCAAGTCCCTTCCTGGCTTTGAGTCTCTGATTTTG
 >chr9:125126844-125127019 + E=6e-94
TCACCTGAGTGGGGCTGGATTGGGCCTTCTCCTAGGGAGCAGCTGGCTCTGACCCACTGTGGTCTTGCTATTCCCAGACCTTATCT|GG

GATGATGGGAGCTATTGAATGTTCTAAGCAGAATTAGGAGAGTGTTCCACATGCCAGACGAGGGTTGTGGAAACACTTCCTCTTCCTTC
>chr9:125128259-125128461 + E=3e-110
AACTATGGTGGAGAAGGAAGTGGGGTGAGAGGACTTGTATTTTACAGCCCCATAAACTTCCTGAGCAACGTCCCCTAGCCAGAGAATGG

CTCTTTCCCCTGGTTTGTCCGT
