# Supplementary material for: Chromothripsis during telomere crisis is independent of NHEJ, and consistent with a replicative origin
Source: HighWire-hosted journal article supplement (doi:10.1101/gr.240705.118), 2019-03-14
Supplement: Supplemental_file_1.zip [file contig.2.DB47_length_407_mean_cov_3.31695331695.docx]

**DB47_length_407_mean_cov_3.31695331695**

GCTACCCATATCCACCAAGACAAGCCCCCATCAGTTATATTTAGTGTACTGTCTCAGTACATTTACACAGTACATCTGTGAAAACACAA
 >chr4:148451681-148451941 - E=4e-145
CTCTTAGAATTATGTTGACTGTTTCTTCACCAGAATTCCCTAGAGATGAGCATGTACAGATTTGGGTATTTTACGATGATGCCACATGG

CATATTATATAGCACAATTTACTGGAGAAATGTTTTATAAAAGATTTTTAGGGTAAATAAGATTTGTGTACAATACAAATCT|TTTG|T

CCAACCTGGACAAAAGGGCGAAACTCCGTCTCAAAAAAAAAAAAAAA|AACAAGGAGGTAAGGGCGGTGGGGGGGGTGGTGCGGGGCGG
>chr4:148696059-148696107 - E=2e-17
TGAAAGAAAAAAAAGTTTTTTTATTTCCTCCGAGGATCCTTTTCCCCAGAGGTC
