# Supplementary material for: Chromothripsis during telomere crisis is independent of NHEJ, and consistent with a replicative origin
Source: HighWire-hosted journal article supplement (doi:10.1101/gr.240705.118), 2019-03-14
Supplement: Supplemental_file_1.zip [file contig.2.DB47_length_621_mean_cov_7.97101449275.docx]

**DB47_length_621_mean_cov_7.97101449275**

GCATGGTTAAGGTTGATGTGGACCATGTCCATGGCCTCCGTCTTCTCTGGAAACTGGAGGCTGGTGGCTGCAGGTGGTCCATGCCCTTC
 >chr4:14688244-14688550 + E=2e-172
CCCTGCTAAAGTCATTTGATGAAAAGGAAGGTGATTTAAAGATATAGCCCTAGTAATTCGCTTTTCCAATACGTAATTGGTATTTTAGA

GCATCATAAAGTTATTGGTCTCTAAAACTGTGCCTTTCTCAGAATGTTTTAGGTGAGTTCTACTTTTCTGCCAGTCCACTTTTAAATCT

TGTTTTGTCAATTATTTCTCTTCTGTATACTTTACG|TTG|GCTGAACCACTCACTATTTTAGGTGGTTGGTACAAGTGAGTGAAGGTC
 >chr4:14691433-14691751 + E=1e-179
AGGAGCTCTTGACTAGAGTAGCAGCAATTTTACTTAGATTTACATTTATTATTGAACATGGGTCATACTCTCTAATATCTGTGCTAAAT

AGTAGCTGTTGTTGAATATTAATAATCTCTATTATCACTGTGAAGTCTGCAATAGGCTTTAAAATAATGCACACAGACATATAAATCTA

TGAATATATTTCTCACTTTCCTTCAAAGGGGCCCATTGTAATTTGCGTACTCTACATCAGGATTCTTTTTGTCCAGTGTTCCTCAGCTT
