# Supplementary material for: Chromothripsis during telomere crisis is independent of NHEJ, and consistent with a replicative origin
Source: HighWire-hosted journal article supplement (doi:10.1101/gr.240705.118), 2019-03-14
Supplement: Supplemental_file_1.zip [file contig.2.DB47_length_635_mean_cov_10.3118110236.docx]

**DB47_length_635_mean_cov_10.3118110236**

GGTTCCCCTCCATGTGGACTCCCCTCTTCCTGGGCCAGTGAACGAGGCGAGGCTTCCTCACAGCACTGTGGTCTCAGCATTCCAAGAGT
 >chr19:57560813-57561115 - E=3e-165
GTGGAAAGGAAAGCTGCAAGGCTTCATGGGCCTCACGGCGGCAGGCACATGCTATCGTTTCTACCACGTTCCGTTGCAAAAAAAAAAGT

TGCAGAGCCAGGCCAGAGCCAGGAAACATGGGAGACAGACACCCTTCTACCCTTCTGGAGCATCAAGTGATTTTTGGCCATTTTTAATC

TTCAACATTACATATATATATATATATATAT|ATA|CAAGTTGTTGCAAAAGACATCATTTTGTTTCTTTTTATGGCTGAGTAGTATTC
 >chr19:57559602-57559939 - E=4e-191
CATGGTGTGTCTATACCACATTTTCCTTATCCACTCTTTGGTCAATGGGTACTTAGGTTGGTTCCCTGTCTTTGCAATTGTGAATTGTG

CTGCTATAAACATATATGTGCAAGTGTCTTTTTCATGTAATGACTTCTTTTCCTTTGTGTAGATACCCAGTAGTGGGATTGCTGGACAG

AATGGAAGTCCTGCTTTTAGTTCTTTAGGGAATCTCTATACTGTTTTCCATAGTGTCAACCAATCATTTTTGAGGGTGCCCCACACTGC

TCAGGTGGTTGTGC
