# Supplementary material for: Chromothripsis during telomere crisis is independent of NHEJ, and consistent with a replicative origin
Source: HighWire-hosted journal article supplement (doi:10.1101/gr.240705.118), 2019-03-14
Supplement: Supplemental_file_1.zip [file contig.2.DB47_length_640_mean_cov_7.021875.docx]

**DB47_length_640_mean_cov_7.021875**

TAGCCTGATTATGCAATAGAAAAGAAAAACCCATTTTCTAGGAAGAAATTCAACCCAGCTGCAGGAATTCTCAGAATTTGCATAAATAA
 >chr14:27758375-27758672 - E=6e-167
CAAGGAGGCTAATGTTAATCACCAAGACAATGGAGAAAATGTACCCAGGGCATGTCAGAGACCTTCTCAGCAGTCCCTTCCATCACAGG

TCCAGAAGCCTAGGAGCTAAATATGATTTCTTGGGCCAGGCCCTGGGTCCTCTTGCTGTGTGCAGCCTAGGGACTTGGTACCCTGTGTC

CCAGTCATCCCAGTCGCTCCAGCCA|TGGCT|GTTTCTCCACCCAAATTTCATCTTGAATTGTAGCTCCCATAATCCCCATGTGTCATA
 >chr14:27757171-27757519 - E=1e-197
TGAGGGACCTGGTGGGAAGTGATTGGATCATTGGGGGTGGTTTCCCCCATGCTGTTCTTGTGAAAGTGAATAAGTCTCAAGAGCTTTGA

TGATTTTATAAAGGGGAGTTCCCCTGCACACTTTCTCTTGCCTGCCACCATTAAGACATGACTTTTCTCTTCATTTGCCTTCTGCCATG

ATTGTGTGGCCTCCCTAGTCATGTGGAACTGTGTGTCAATTAAACCTCTCTTCTTTATAAATTACCCAGTCTCAGGTATACCTTTACTG

GCAGTGGGAGAATAGACTA
