# Supplementary material for: Chromothripsis during telomere crisis is independent of NHEJ, and consistent with a replicative origin
Source: HighWire-hosted journal article supplement (doi:10.1101/gr.240705.118), 2019-03-14
Supplement: Supplemental_file_1.zip [file contig.2.DB47_length_776_mean_cov_7.92525773196.docx]

**DB47_length_776_mean_cov_7.92525773196**

TGTGGGTGTTCTTTAAGGAAAAGCAAGTAAGACGAATATCGTACAACCCACCTAACTGCAATTGAATCAGTGGATGCTTCACTCGCCTG
 >chrX:10602748-10603201 + E=1e-260
GAATTCGTCTGTTCTTGGTGTGTTTAATAATGAGTCATGCGATACATTTGCAAGGCAATGGGGCCACCTCCCAGGGCCTGGGGCCACGT

TATGATTTTCTGCGCCTGAGTCCCCCGTCTTTGTTCAGACAGGTTGCTAATGCATCCCGCGAAGCTGACCTAATGCTACTTCAGTGGGT

CTATTTTTCTTCTGTGGCTCAGCTCGAATGTGATATTCAGGAAGTCGACTGTCAGGCATGCAAATTGAGAGAAAAATATGCCACATTAA

ATCATGATGGTTTAATAAGGTATTACTCATGGGCAAATGGCTTCTGGTACTCTCCTTAGTAGGGGCAAGTTGAAAAGCATAACCTGCCC

CAGA|GAAG|GAAAATTCAAAGCAATGGAAACAAAATCAGTCCTTACAGGTTTCACCGTTGGGATTTGGACCCGGAGTGAAAAGAGGAT
 >chrX:10604487-10604814 + E=7e-185
AATGGTCTCAGAGCAGCCTCTGGTGGCTGAATGTCAAAAGCTCAAGAAGTCAGAGGCCACCTTACTAGTGTTCTCTTGACCTCCACTCT

CCACGGTCTTAAGATTTTGTGCAAAGGAAGTTACTATTTAAATGACTTCAAGGCACTAGTTCAGAATTGATTAGGTTGGAATTGAAGTG

AATTCATCAGTTTCAAGGGCAATCACAGATGGACTATGGATTTGATGCTGACAAACTGGGCCATTC
