# Supplementary material for: Chromothripsis during telomere crisis is independent of NHEJ, and consistent with a replicative origin
Source: HighWire-hosted journal article supplement (doi:10.1101/gr.240705.118), 2019-03-14
Supplement: Supplemental_file_1.zip [file contig.2.DB48_length_319_mean_cov_2.09717868339.docx]

**DB48_length_319_mean_cov_2.09717868339**

ATAATAATAAAAAATAAAATAAAATAAAAT|AAA|GCATAGATGCTTTTTTTGTGAAGGAATTATAGAGCAAGGACATTTGGATTCATT
 >chrX:136571115-136571148 + E=2e-08 p=1e-02 >chr7:51672795-51673086 + E=2e-158
ATTTGAAATAATTAGTATTTGTTTTCTCTCCATCATGTCAAAACAGAGAATTTGAAGTAATTTCAAAACTAAGAGCAGTGGTCCAAAAG

AAAAAAAAAACTTCTCATAGTTTATCCATAGTTTAAACACAACAATCACTAATGAGCAGAACTGTGTCTATAAGATTTCTGGAGTTCAA

GGTGAGTAGGGAAACAAGTTTGGTAAGTCACAGTGCTGGAAAGGAGGAAATGGT
