# Supplementary material for: Chromothripsis during telomere crisis is independent of NHEJ, and consistent with a replicative origin
Source: HighWire-hosted journal article supplement (doi:10.1101/gr.240705.118), 2019-03-14
Supplement: Supplemental_file_1.zip [file contig.2.DB48_length_347_mean_cov_5.95389048991.docx]

**DB48_length_347_mean_cov_5.95389048991**

AAATCTGTCACTACAATTTAAACACCAGTCCCGAAATTTGGATCTTCTTTCTTTTTGAATCTCTCAAACGGCAACATTCCTCAGAAACC
 >chr7:50469169-50469391 + E=2e-122
AAAGCTTTATTTCAAATCTCTTCCTTCCCTGGCTGGTTCCATCTAGTACCAGAGGCCTCTTTTCCTGAAGAAATCCAATCCTAGCCCTC

ATTTTAATTATGTACATCTGTTTGTAGCCACAAGCCTGAATT|TC|AAGACTGGGACTTAGAATTCCCACGTCCAGCACTGTTGTAGAT
 >chr7:50472250-50472377 - E=5e-65
GGGAGGTACGTTGTGCTGAACTGCTGCGCTGGCCACATCAAGACACCACATGTGTTCCCAAGTGGTATTGCAGCTGTCCTGA
