# Supplementary material for: Chromothripsis during telomere crisis is independent of NHEJ, and consistent with a replicative origin
Source: HighWire-hosted journal article supplement (doi:10.1101/gr.240705.118), 2019-03-14
Supplement: Supplemental_file_1.zip [file contig.2.DB48_length_375_mean_cov_3.89066666667.docx]

**DB48_length_375_mean_cov_3.89066666667**

AA|AATAAAACAAAAAAAAAAAAAAAAAAAAAAAAAAAAAAAAAAAAAAAAAAAA|CAATATTAGGTATTCCAAAATA|AAAAAAAAAA
 >chr2:88206930-88206982 + E=8e-17 p=0e+00 >chr7:527
AAACAAAAAAATAAAACACACACAGTTGGAAAAACTGTGAATGATGTAAAGGAAACAATAGCTGTGAAAATAAATTTTAAAGGAATATA
89452-52789751 + E=8e-166
CTTTGATTAAGCTTTGAGAGATTATCACTTAAGTGGCACTTAAGTTTTAACCACGGGGGATTATTTATATATAAATCCTGTCAGACTGC

TTCTTTCTGTAGTTGGTGAAGTGTGAGTTCTACTGTTAACGGAGGTAGAGATTTTAGAACATACCAGTAGACAGACTGTGGGACACTCA

ATTAAATGGCAAAACATCCACA
