# Supplementary material for: Chromothripsis during telomere crisis is independent of NHEJ, and consistent with a replicative origin
Source: HighWire-hosted journal article supplement (doi:10.1101/gr.240705.118), 2019-03-14
Supplement: Supplemental_file_1.zip [file contig.2.DB48_length_442_mean_cov_8.47511312217.docx]

**DB48_length_442_mean_cov_8.47511312217**

TGAGAACCATGGAAGCCAATGGTGTAGCTCTCAGTCCAAGGCAAAAGCCCTGAGAACCAGGGGGGCTGCTGGTGTGAGTCCTGAAGTCC
 >chr11:124568588-124568790 + E=5e-110
CAAGGCCCAAGAACCAGCACCTCTGGTGTCCAAGGACAGAGAAAAATGGATGTCCCAGCTCCAAAAGAGAATTTGCCCTTCCTCTGCCT

TTTAGTTGGTACTGGTACTT|TTGC|AATGCTAATGGTGCTTCTTGGAGCTATGCAATGCAAAAAGGAGACTCTCCCAAAAGAAAGAGC
 >chr11:124570068-124570312 + E=2e-135
TTTGGGTGCACCCTTTGATAGCTCAGCTGGTAGAACAGAGGACTATAGGCTGTATAGAAAGAGCTTTGGGTCTAAGAGAGTATGAAAAA

TCATGAGAGAGGGAGAGAGAGAGAGAGAACTTGAACTGTTTTAGAAATATATGCAAAATTTTCTCTGTGGGAAGCTAAGTGTGAGAGT
