# Supplementary material for: Chromothripsis during telomere crisis is independent of NHEJ, and consistent with a replicative origin
Source: HighWire-hosted journal article supplement (doi:10.1101/gr.240705.118), 2019-03-14
Supplement: Supplemental_file_1.zip [file contig.2.DB48_length_499_mean_cov_5.19038076152.docx]

**DB48_length_499_mean_cov_5.19038076152**

ATATATCATAACACTTAGTCACCCTTTAGAATTTAATACAAAACAGATGCCGAAAGAGAAATTGCAAAATGAAGGTAGAATTTTAAAGA
 >chr11:100075790-100076018 - E=1e-125
TGTCTTAGAAATAATGGCCTCTCAAAAACCCAACTCTTTGAAAATCACTTTGAGAAATAACATAGGAGTCAATCTAAAAACACAATACT

TACATATCAATAGTATTTCAAAATGTAAAACTGAACTGTTTGCT|TATATA|TATATATATATATTAGTCAATGTTTGTTTCTTGGTGA
 >chr11:100074802-100075048 - E=3e-129
GCTACTCTAAATGGCTAGTTTTTAGTTCATATACTCCTATGTCTACTGATTCCTTTAATGACTACAAATATTTATTTGGTCTTTACTGT

GCACCAGGTACTGTGTTAAGCCCAGCAAATAAGTATGTTCCTAACTAACTTTCAGAAACATAAAGACTAGAAGAGGAAAAAAAAACTGC

GCAAATGTTTAAAGCAGCATAGATCC|CCGAGGCGGGACCTGCCAGGCCTCACGGGC
