# Supplementary material for: Chromothripsis during telomere crisis is independent of NHEJ, and consistent with a replicative origin
Source: HighWire-hosted journal article supplement (doi:10.1101/gr.240705.118), 2019-03-14
Supplement: Supplemental_file_1.zip [file contig.2.DB48_length_519_mean_cov_3.75722543353.docx]

**DB48_length_519_mean_cov_3.75722543353**

AATGACTAATTAACAATACTGATATTTTTCCTTCTGTCCATTTCACAAATATAAATATTAGAAAGCATATTAATTAAATTAAAAGGCAC
 >chr8:2507309-2507549 + E=8e-133
CAAACAGAAATTGATTTTTTTAACTTGTGAAAATGTCTAGGCAAAGACTATGTACATCAGTCTTTTTATTCCTATTTTCAGAATGAAGA

TTCATTACTATTATGAGTTGAATTATCTCCCTCGTAAAAAGATAAGGTGAAATCCTAACCCT|TTT|TTTTGTATTTAGAGAGACAGGC
 >chr8:2509340-2509616
GCTGAGACCTTCCTGCCATCTTCAATCGATGGATACTTGCTGAGCAGCTGTTCTGAGACATTGTTCTGGGGGCTGGGGATAAATAGCAG
 + E=2e-154
AAGACAGCCAGAGCCTCTCTGCCCTGGCGTCTGATAGCAAAGGGCAGTAAGTGTTTGTGACAATTTCAGGTGTTAAAAATTCTACTGGT

AGAAAAGAGACCCGAAAAGGATTGGTTAGAGAAAGGGTCAACCAACAAGCTCAGGGCAGAGTAGGTAGAGACCTGT
