# Supplementary material for: Chromothripsis during telomere crisis is independent of NHEJ, and consistent with a replicative origin
Source: HighWire-hosted journal article supplement (doi:10.1101/gr.240705.118), 2019-03-14
Supplement: Supplemental_file_1.zip [file contig.2.DB48_length_521_mean_cov_7.19769673704.docx]

**DB48_length_521_mean_cov_7.19769673704**

CCATGCCTGCATGGCAATGGGTCCAAACGAGGGTGCCAGAGGGGCCAGTTGCAGGCCCTGAAAGGGTCGGAGGAGGATGCCAGGGTCGT
 >chr17:76482707-76482884 + E=7e-95
GGGGGCTGTGCCCTCTCTGGGGTTGCTAGCTATGGGGGTGCTGTAGGTCTAGAACAGTTGGAAGCCATTCTTGCTACCACACGG|GAAG
 >ch
|AAAAAAAATGAGTCTCTGTCTAAAGAGGCACGTCTGCCGGTCAGCGCAGGGCAGGCTGGCTGTGTGTGTTAACAGGAGCTTCCTGCTT
r17:76483284-76483632 - E=6e-198
AGGCCCTGGGCATCCTGGAAATGATGCACGTGCTGAGCTCACTGGCACTCGAGGGGGCCAGGCACTAGTGATGCTTTCAGCAGATGCTG

ATTTGGCAACACTTACCCTGGACCAGGCCCCCTTCTCTGAGCTTTAAAAATATCAGCCCATGTAGTCCTTGGAAATGAGGGTCATGGAA

ACATCACCCCTGTTTACAGATGAGAAACCAGGGACTCAGGCATGTGCAGTAACCTGCCTAAAGCAGCAGCTGGCCATG
