# Supplementary material for: Chromothripsis during telomere crisis is independent of NHEJ, and consistent with a replicative origin
Source: HighWire-hosted journal article supplement (doi:10.1101/gr.240705.118), 2019-03-14
Supplement: Supplemental_file_1.zip [file contig.2.DB48_length_527_mean_cov_4.37191650854.docx]

**DB48_length_527_mean_cov_4.37191650854**

ACAATTTCTTTCACAAGCAGCCTACATTCAGTGTCTGATCAACACGTGAGATCAAGAAACAGATGCTTCACCTACTCCAGACCACTCAC
 >chr7:52533429-52533726 + E=4e-164
CTGTGGCTCACTCAGCACTCCCCATGGGTGTGTCCTGGGTCATTTTCCACTGCACCACAATGCACTATCTCCCCATGCCAAAGCCTCCT

GTCTCTCACAAGGCAGTGATCCCAATCATGCTTCCTCATAAGCATACTGCACACTAATTTTAATCTCAGATTTTGCTACCTGAAGGACC

TAACCCATGACACTTGGTGCCAAGAACGGT|GA|CTAGGAAATCGTGACTAGAAAACATTTAGGAATACCATTCTAAGTTAACTTTCAG
 >chr7:52531973-52532138 - E=1e-78
ACTTGCTTCAAATGTGAATTGAACCATCAGCAACTGAAGTTATAGAACAGTTTGAACTGAAAATAAAGTCAATTAATTGTAAAAAAAAA

AATGTAAAATTCGATCTTG|AATTCAAGGAAGAACGAATATAATGTCTTACAAACAAAATACCTGCATACTAAGTGTGCACAGTG
