# Supplementary material for: Chromothripsis during telomere crisis is independent of NHEJ, and consistent with a replicative origin
Source: HighWire-hosted journal article supplement (doi:10.1101/gr.240705.118), 2019-03-14
Supplement: Supplemental_file_1.zip [file contig.2.DB48_length_530_mean_cov_4.24528301887.docx]

**DB48_length_530_mean_cov_4.24528301887**

TGATCCTGGCTTTGTAAATATTCCCTTTTCCCAACAAAGTGTATTCCTTAATCCATGCCATATGTCATTGTGGAATTTCTCTGGATCTC
 >chr11:108690751-108691103 - E=3e-200
TGATGACAAGTGCCAATCCAGATGGGACCTACCTGACAAATCTAAACCTTTCAGAATTTAGTGAAGAGTAGTTAATAACAGATGCCATG

TGCCAAACACCACGCTAGATGTTTTATATTTCATTTACTCGGCACAACCACCCTTTTGAGGAACTGCCTGCATTTTACAGATGATGAAA

TAATTATTCAGCTAAAAAGGACAGAAGCATGCTCTAAACTCAGGTTTATCAAACATCAAAATTTATCTTCTTGAGCTTTGAAGCT|CAA

CACTTCTATTCAACACAGTACTAGAAGTCTTAGCCAGAGCAATGAGACAAGAGAAAGAAATAAAGGGAAACCAAATCAGTAAAGAGTAA
 >chr11:108701148-108701323 - E=1e-93
ATCAAACTGTCGCTGTTTGCTGATGATATGATTGTATAACTAGAAAACACTAAAGACTCATCCAAAAAGCTCCCAGAACCGGTAAA
