# Supplementary material for: Chromothripsis during telomere crisis is independent of NHEJ, and consistent with a replicative origin
Source: HighWire-hosted journal article supplement (doi:10.1101/gr.240705.118), 2019-03-14
Supplement: Supplemental_file_1.zip [file contig.2.DB48_length_532_mean_cov_5.69736842105.docx]

**DB48_length_532_mean_cov_5.69736842105**

TACAT|GTGTTGAAATGGCAAAGTAGCCTTTAAATAACAAAGCATAAAGAAAATAGTGACTTGAGTTTCTTGAAGAACCATACACTTTC
 >chr10:27244583-27244858 + E=7e-154
TAAGGGATATTAGTCCTGTGTATGCAACAAGTGAGAACATTAAGAAGGCTGTTTTATTTTATCAGCTGTGGTTCCTGTTGATCCTGTGG

AAGAAAATTATGTTCATAAAGTGGAAACTGTATTTTTTTCAATCTCCTTCCCAACTCCTTTCAAATCAAGAGTACGTCTTGTAGCAGTT

TCAAAGGTTAGG|CA|GAAAATTTCTGTGGGTTATTGCTAGAGAACTCATTCAGTGCACTTTTGGCAAGAGATTTTGGCAAAATGAAGC
 >chr10:27245948-27246202 + E=3e-141
AGTACAACATGTCAGTATAAAAGGACAAATAAGCCAGGTGCGGTGGCTCACGCCTATAATCCCAGCATTTTGTGAGGCAGAGGCAGGCA

GATAGCTTGAGACTAGGAGTTCAAGACCAGCCTGGGCAACATGGCTGTACAAAAATTAGCCAGGCATAGTGATGTGTGCCTGTGGTCCC

A
