# Supplementary material for: Chromothripsis during telomere crisis is independent of NHEJ, and consistent with a replicative origin
Source: HighWire-hosted journal article supplement (doi:10.1101/gr.240705.118), 2019-03-14
Supplement: Supplemental_file_1.zip [file contig.2.DB48_length_548_mean_cov_4.65875912409.docx]

**DB48_length_548_mean_cov_4.65875912409**

CACTTCCAACAACAGCAAATACATATTTTTTAAGTGCACATGAAATGATCACCAGAATAGAATTTATTCTTGGCCAAAAAACAACCTTT
 >chr7:49784991-49785319 + E=8e-186
AACAAATACAAAATATTAAAATTATACTAACAATGTTCTTGGACCATAGTAAGAAAAAAGTAGAAATGAACAGAAAAATATATACATAG

GAATATCCAAATATTTGAAAAATACTTTTACATAACCCATAGCACAAAGAAGCAGTTACACAAGATAATAGGAAATACCTTAAGTTTAA

TGAAAACAAAATCACAACGCATTGAAATTTGTGGGATACAAAACCAGTGCTTAAAGAA|AAA|GCAGTCTTGAGTGTCTGGATTCAACA
 >chr7:49856336-49856559 - E=
GTGGGCTCTTGACTTCCTTAATCCTCATATTAAGCCCACAGGGAATGAATGGAAGATTGTCCCAATTTTGTAAGTGAAGAAACTGAAGA
1e-122
GGGGAAGCAAATTAGACAAGGTGATAGGGATAAAGCTAGAATGTGCCAGTCTAGCTCCAAAGCCAAGGCTTTTTGTACTATTTCTTCAA

GGAATTCAGTCTAACT
