# Supplementary material for: Chromothripsis during telomere crisis is independent of NHEJ, and consistent with a replicative origin
Source: HighWire-hosted journal article supplement (doi:10.1101/gr.240705.118), 2019-03-14
Supplement: Supplemental_file_1.zip [file contig.2.DB48_length_591_mean_cov_6.26734348562.docx]

**DB48_length_591_mean_cov_6.26734348562**

TGTATTTTTACGTTAAGATGAACCAAAATTATTAGACTTATTTAAGATGTACAGGCATCAGAAAAAAGAAGCACATAATGCTTTTGGTG
 >chr7:50471701-50472147 + E=7e-254
CGATGGCACTCACTGTGAACATGTGTAACCACATATTAATATGCAATATTGTTTCCAATACTTTCTAATACAGTTTTTTATAATGTTGT

GTGTGGTGATTGTTCAGGTCGAATCTGTTGTATCCAGTACAGCTTTAGGTCTTCAGCTGCCCTTCTGGCGAGTACATGCACAGGATTGT

AAATGAGAAATGCAGTCATATTTCCAGTCTGCCTCTATGATGATGTTAAATTATTGCTGTTTAGCTGTGAACAAGGGATGTACCACTGG

AGGAATAGAGTATCCTTTTGTACACATTTTGAAATGCTTCTTCTGTAGTGATAGAACAAATAAATGCAACGAATACTCTGTCTGCCC|T

AT|TTTTAGAGGCAGGGCTGCATTGGGAGCATCCAGAACTGCTACCTTCCTAGATGTTTCCCCAGACCGCTGGCTGAGATTCCCTCACC
>chr7:50468513-50468661 + E=2e-77
TGTCGCTTCCTAGAATCCCCTTCTCCAAACGATTAGTCTAAATTTTCAGAGAGAAATAG
