# Supplementary material for: Chromothripsis during telomere crisis is independent of NHEJ, and consistent with a replicative origin
Source: HighWire-hosted journal article supplement (doi:10.1101/gr.240705.118), 2019-03-14
Supplement: Supplemental_file_1.zip [file contig.2.DB48_length_670_mean_cov_5.86268656716.docx]

**DB48_length_670_mean_cov_5.86268656716**

TCTCTATAATTTCAGCTCATAATTCTGATTTTTGTTAATACAAGAAATGTTTCTTCCTACATGTCTAATATACCTAGCCTGTTACCCCA
 >chr13:92238926-92239270 - E=3e-195
AATTTATTATAAACATATGTCTAAATGTATTTACATTTTTAATCGTAAGGTTGCATATCTACCAAATATTTCCATTTTGAATACTGAAA

CTAATCAAAAGTTAAAGAACTCTTCCCAAGACCACAAAATCAATATTGTGCAATATAACTCAAGACTTGTTGATATGGTTTGGCTCTGT

GTCCCCACCCAAATCTCATCTTGAATTATAATCCCCACATATCAAGAAAGGGACCTGCTGGGGGGTGATTGGATCAT|T|TTAAACAGT
 >chr13:9
AAAATGAAAAGAGAAAACCTCAGAAGACGTAGACAGAAGTTAATACACAGAGCTCAACTGCAAACTATGTGCATATTCTAATTTTTAAA
2237768-92238093 - E=9e-181
AGCATAACACACATAAGCAGTGGACAGTTCAGACAAACACTCACAAAAAGCACCATCACCAGAATCTTGGAAGACTTCTTTGTGGTCCT

TCTTGCAGCTGCTCCCTCCACCCCCCAAACACAACCACTATTTTGGGTCAAACGCCACAGATTTTTTTTGCATATTTTTGAGCTGCATA

TTAACTGTTAATATAATTGCACAGTATACCTCATTCCTTTTGCTCATCA
