# Supplementary material for: Chromothripsis during telomere crisis is independent of NHEJ, and consistent with a replicative origin
Source: HighWire-hosted journal article supplement (doi:10.1101/gr.240705.118), 2019-03-14
Supplement: Supplemental_file_1.zip [file contig.2.DB48_length_720_mean_cov_9.69166666667.docx]

**DB48_length_720_mean_cov_9.69166666667**

GAATTCTACCAGAGGTACAAGGAGGAGCTGGTACCATTCCTTCTGAAACTATTCCAATCAATAGAAAAAGAGGGAATCTTCCCTAACTC
 >chr9:88820248-88820625 + E=5e-215
ATTTTATGAGGCCAGCATCATCCTGATACCAAAGGCTGGCAGAGACACAACAAAAAAAGAGAATTTTAGACCAATATCCTTGATGAACA

TCGATGTGAAAATCCTCAATAAAATACTGGCAAACCAAATCCAGCAGCACATCAAAAAGCTTATCCATCACGATCAAGTGGGCTTCATC

CCTGGGATGCAAGGCTAGTTCAACATACACAAACCAATAAACATAATCCATCACATAAACCGAACCAAAGACAAAAACCACATGATTAT

CTCAATAGATGCAGAAAAGG|C|TTTATTCTGATATTGGTAGATTCTACTGAAGGCTTGTATGCAGGGACATGATGGGATCAAGTCAAA
 >chr9:88639325-88639669 + E=4e-195
TCTGCTTGCCTGAGAATGGTTGAAAAGGGAGGCAGGGAAGCCAGTCACGTGAGAGAAAATGTTGGTCTTAACAAAGGTAGTGGCAGAGC

AGGTGGAAGAAAGTGGATGAAATCAAATGTTTTCAGAGGTACAGCTAATGGGACATGGTGAATGAGAGTTTCTGCCAAAATCAAGGATG

ATTTTTCAGAAATTTTTTTGGCTTTGGCAACTAGACGATGGTGGTGCCACTTGTGTAGATATCTAGGCAAGGTAGGAGACCAGGTTTGG

GATAAAGATT
