# Supplementary material for: Chromothripsis during telomere crisis is independent of NHEJ, and consistent with a replicative origin
Source: HighWire-hosted journal article supplement (doi:10.1101/gr.240705.118), 2019-03-14
Supplement: Supplemental_file_1.zip [file contig.2.DB48_length_721_mean_cov_8.23023578363.docx]

**DB48_length_721_mean_cov_8.23023578363**

CAGCTTTTCTTAAAGGTAGTTAGCCATGTCCATATAGTTAAGAGTTGTGCTGTAATTCTGCTGTGAGATTAAAAATCAGGTATATGATT
 >chr1:107560595-107561023 + E=9e-246
TAAAATATATAATATTCTCACTATTTAGTAACTAGAAAAGTCAGGGTCATAATTGGTGTGACCAAATTTTCTGACACTAGATTGGGAGA

GTTCTGAGACTTTTTACTGCTTACACGTCTAGGTCCACCAGGAATAGTCCAAGAACACATACCGGCTCCAAATGATTGCAACTTTATTT

CACAAATGCTCACAAACTATTATTTCATAATTGATTTTAGAATCCTGCCTAGATCTATTGAGGGAACTACAGTTTATAAATAAAATATC

TTGATACTTACTGAAAATGTAGATCTTATCTATCCTTACAAATCTTTCATGATTCTTTCAACATTTCCTACA|GCTCAGGT|GAGGCAG
 >chr1:
CTCACCTGAGTTTCAATGTCCAGAGTTTTTATTGAGGCTTTATTACATAGGTGTGATTGATTGATTTCCCACAAGATTGTACTCAACCT
107564232-107564517 + E=1e-156
CTAGGATGACCGATAGATACCATACAACCCAACCCCCCTACTCTAAATCACATGGTTGCTATTTATGCTATTTATGGCATGAACAGCGC

CATTCTAAGGCTATTGGGTATGGATGGCATCGCTAATAAGATCTAGTTTAACTGGCACCAGTCAATGTATGTCATACCTGAGAGGAGTG

TCTTTGTTTAC
