# Supplementary material for: Chromothripsis during telomere crisis is independent of NHEJ, and consistent with a replicative origin
Source: HighWire-hosted journal article supplement (doi:10.1101/gr.240705.118), 2019-03-14
Supplement: Supplemental_file_1.zip [file contig.2.DB48_length_742_mean_cov_7.45552560647.docx]

**DB48_length_742_mean_cov_7.45552560647**

CTTTGTGAAAGAGCTGAAACTCTTTCCTCAGAGTTTCAAAAGAAGCCATGTCAAGTCCGAGTGAAGTGTGACTCTTGGAGGAAAAAGAA
 >chr10:109899225-109899567 - E=6e-194
AAACATGATATGCTAGGGTATTGATGATGAGGGGCAGTTAATCCTTCGGGATTTGAGTGTATTTCAGAGAGTAAGAACACAGTTGCAGT

CAGCCCTGTTTCTACTGGCAACATTTCTTTCCATCTATTACCTACACCCATCCATGACATCTGACATTCACCTCACAAGGCCGAATGGC

TTAGTTCTCTGGAAATTTCTAAGTGTCAGCTTTTAATATAGTATGCTTCGAGGTTTAAAATCATCTTCAGCCAAA|TTCCAGGGAAGCC
 >chr10:1098
TGCACTTGGTCACTAAGAAGGACAGAGTTATAGAGGCTTGGTTAATCAGGATCCTTTGACGGGAAATCTTCACTCCAAAGGTCTCCACC
96761-109897164 - E=2e-220
TTGCTGGCTGAGGCTTTGTCAGGCTTGCATCACATTTCTGCTTTTTCCTCTACCTAATTTTGTTTCTCTTCCTTTTCTTTTCTTTCGGA

GATGTTAATCCCTAGCCAGTATCTTACACTTCAGATACCATCTCAGCTTTTCTTTCTTTCTTCTTCTTTTTTTTTTTCAATTCCTGGAT

GGCCCAAATTGCTACAGACAGCAATAAAAATGCAGTGGTTTGAGATACATGTAATGAGATGAGATTTTGGAGCTGGATCAAACACTTTC

TTGCTGGCAATGAGTACTCCTTCACTGGTGG
