# Supplementary material for: Chromothripsis during telomere crisis is independent of NHEJ, and consistent with a replicative origin
Source: HighWire-hosted journal article supplement (doi:10.1101/gr.240705.118), 2019-03-14
Supplement: Supplemental_file_1.zip [file contig.2.DB48_length_840_mean_cov_13.144047619.docx]

**DB48_length_840_mean_cov_13.144047619**

ATGCGCATGTTATAGACTGGAATGTGTTACCTTCAGAAACCAAACCTTGACGGGTATGTATATGT|ACAATGATCTTGGATAAACTTTG
 >chr7:51673249-5167365
AAGGCATAATCATGAAAATCCATTAATGGAAGTTCATTTTCCCTAATCCTCTCCCTTATTTGAAAATCTCTCTTTCTGTAAAGGTACTT
9 + E=9e-235
TGTGTTCTCCTTTAGCAGGTGTAGTCCCCCGTGTACACGATTCCGTCTCAGGACTCACACCCATGCTGTGATAATTTATTAACGAAGAA

CTTATGCATAGTTCACTGCAGGTTGTGAGAGTGAGCATCGTCTGGTTTATGTTTTTGTCTTCGTTGCCCACAGCCGTACCTGGTACCTA

GTAGTCAGTAATAAATGGATGAACAGGGAGTGAGTAACAGGCACACTGGTTCTCAGCTCTGGCCGCACTTTAGAGTCCTCTGGGGAGCT

TTTATATAATATTGATGCCTGAAAACT|TCCC|ACTTCTATTGTATAAAATCAATAAAAACATTACAGCCAGCCCTCTGTAGCCATGAG
 >chr7:51677489-51677858 - E=4e-204
TTTCACATTCACAGATTCAATCAATGGTTGATGAAAAACTTTTGGGAAAAATATCAATAAAAAATAAAAATACAACAATAAAAAATAGT

GCAAATAAAAAATATAGTATATCAACTTTTTACATAGCAATGACATTGTATCAGGTATCAATAATTAACTTAGAAATGACTGAAAGCAT

ATGGGAGAATGTGCATAGGTCATATGAAAATAACGCACCATTTTGTATCAAGGACTTGAGCTTCCTTGGATTTCAGTACCCACAGGGTG

TCCTGGAACCAATCCCCCATGAATACTGAGGGAAGACTGTAT
