# Supplementary material for: Chromothripsis during telomere crisis is independent of NHEJ, and consistent with a replicative origin
Source: HighWire-hosted journal article supplement (doi:10.1101/gr.240705.118), 2019-03-14
Supplement: Supplemental_file_1.zip [file contig.2.DB48_length_927_mean_cov_6.67961165049.docx]

**DB48_length_927_mean_cov_6.67961165049**

ATCCACAATACCAACAACAATAACCCAAATCCTCCCAATTAAGAGGTGAAGTGGCGAGAGACATACTGAGGAACCAAATAAATTTACAA
 >chr7:52789744-52790180 + E=3e-226
GCTAAATGTGCTTAATGTTGATAAAACAAACCAAAGAAAGATGGTTTTACTTTGTATTTTTTGCCTTTCTAGTTGTGTTTGTTTGATTT

TACTTTTTATTTATGAATATGCATTCCTTTGAGATTTAAGAGAAACAATATTTTTGAAAAGACAGAATACTTAAAAAGTAAATACTTTT

CCAATAAGGGCTTGTTCTCTGCTTTATAAATGATGTCTCTGTCTGCACCCTCAATGAGTGAGTAATCAAGCTCCACCAGGCCTGTTTCA

CAGGGGCACTGGTCCCATTCATTCAGGCTCTGCCCTCATGACCTTACCACCTCCTAAAGGCCCTACCTCTTAATGCCG|TT|TGGCAGT
 >chr6_db
ACTGAGGACATAGCTTCACTAAAGAAGCTCTTTCAGACTCTTTCATGCTTCTTGGAGTCCTAGACTTCAAGATGAACAACTCAGGCCAA
b_hap3:3684845-3685340 - E=4e-249
GAGCTTGGGATGGCTGGCATTGTATCTCATTTAGAGAAAATGAGAGGAGAAACTCTGAGGTTCAACACTCTCAACACTGGAGAAGGATG

AAAGGCTGTATCTTGAAACACAGGTAGTAGTTAGTGGAAATAGTGGGCTGTAAAGGAGCTACCTTCTTCTCATCTCTACCATCTTATAT

ATGACAAGAGATTGGAGTTGACTAATGGACACACCTCATTTGAGGATTCAGGTCAATGAATATGAGAGAGTATAATGGGCAAAGCCTAT

TTTTTTTTTTTAGACAGAGTCTTGCTCTGTCGCCCAAGCTGGAGTTGGTGGCGTGATCTCAGCTCATTGTAATCTCCGCCCCCCGGGTT

CAAGCGATTCTCCTGCCTCAGCCTCCTGAGTAGCTGGGA
