# Supplementary material for: Chromothripsis during telomere crisis is independent of NHEJ, and consistent with a replicative origin
Source: HighWire-hosted journal article supplement (doi:10.1101/gr.240705.118), 2019-03-14
Supplement: Supplemental_file_1.zip [file contig.2.DB49_length_427_mean_cov_7.74004683841.docx]

**DB49_length_427_mean_cov_7.74004683841**

TTAAACAATAAATGTCATGGCTGGACGCAGTGGCTCATGCCTGTA|ATCCCAGCACTTTGGGAGGCCGAGGTGGGAGGATCAC|GAGGT
 >chr20:48738939-48739021 + E=9e-26 p=0e+00 >chr16:32449610-32449989 + E=1e-183
CAGGAGATCGAGACCATCCTGGCTAACACGGTGAAACTCTGTCTCTACTAAAAATACAAAAAACTAGCCAGGCATGGTGGTAGGTGTCT

GTAGTCCCGGCTACTCGGGAGGCTGAGGCAGAAGAATCACTTGAACCTGGGAGGCAGAGGTTGCAGTGAGCCAAGATCACACCACTGCA

CTCCAGCCTGGGTGACAGAGTGAGACTCCATCTCAAAAAATAAAATAAAATAAAATAAAATAAAAAACAAATAAATACAAGATTGTTGT

TTCTTATAAACTTTTTTTGTATCTTTGCCTATTTTTTTCACTGTCTAAGGAATTTTTATTAAAGCAAAAT|GTT
