# Supplementary material for: Chromothripsis during telomere crisis is independent of NHEJ, and consistent with a replicative origin
Source: HighWire-hosted journal article supplement (doi:10.1101/gr.240705.118), 2019-03-14
Supplement: Supplemental_file_1.zip [file contig.2.DB49_length_450_mean_cov_9.99555555556.docx]

**DB49_length_450_mean_cov_9.99555555556**

AAC|AAAAAGAAAAAAAAAAAAAAAAAAAAAAAAACAAAAAAAAAAAAAAAAAAAAAAAAAAAAAAAAAAAAAAA|AAAAAAAAAAAAA
 >chr4:19079462-19079533 - E=4e-19 p=0e+00 >chr8:11879
AAAAAAAAAAAAAATCAGTGAACTTAAAGACATATCAATAAAAATTATCCAAACTGAAATGTAAAAAGAAAAAATCATTTAAAACACAA
9912-118800288 - E=4e-215
AGAGAGCTTCCACAAGAGAAGGATAATATCTAACAGTCTAACTTTAAATAATTAGAGTCCTCCAAAAAAGAGGTTAGAGTGAATAGGGG

AGAAAAAAATATTTGAAGACACAATGGCTGAGAACTTTTCAAAAATGGATGTAATCTTTAGATTAACTCACAAATCCAAGAAACTCAAT

CAATTCCAAACAGGATAAATATGAAGAAAAATATACCTGAGCACAAAATAGTCAAGTTATTGAGAATCAAAGATAAAAAGTGCCCTCTA

AAAATAT
