# Supplementary material for: Chromothripsis during telomere crisis is independent of NHEJ, and consistent with a replicative origin
Source: HighWire-hosted journal article supplement (doi:10.1101/gr.240705.118), 2019-03-14
Supplement: Supplemental_file_1.zip [file contig.2.DB49_length_462_mean_cov_11.6883116883.docx]

**DB49_length_462_mean_cov_11.6883116883**

AGCCTGGGGGTCCCATCACCCAGGCTTCCATACCACCCTGCACCCTCTCCATGCGCTTCCTCAGACCACAGTGTGCTGCTCCAGGAGCC
 >chr6:148608070-148608361 + E=1e-163
TATGGGTGGAGTCCAGAGGGTCAGATTTGAGGGATGAGATGTGAGTGGAGGTGCCGTTCTTGCCCCAGGTCTCTGATGGCATCAGGAGG

AGACTTCAGCTCCAGAATGCTCTCCTTCCTCCAGATGCTTGGGCAATACCCAGGACAATACCCCAAGAAGTCAGCTCCTAATGATGGCT

TCTTGAGGATCAGTAGGGCAA|TTA|GAGTGTGTGTGAGTGTGTCTGTGTCTGTGAGAGAGAAAGGGAGGAGGGAGAGAGGAAGAGAAG
 >chr6:148874818-148874992 + E=4e-93
ATGAATGCTCATTCAGGTCTAGGTCTGGACCACTCATCAGAGAACCATGGGAACCATTATTTGGAAATATTCCAATTTCCAATACAGCA

CCCCTCCCACATGACCTCA
