# Supplementary material for: Chromothripsis during telomere crisis is independent of NHEJ, and consistent with a replicative origin
Source: HighWire-hosted journal article supplement (doi:10.1101/gr.240705.118), 2019-03-14
Supplement: Supplemental_file_1.zip [file contig.2.DB49_length_560_mean_cov_9.375.docx]

**DB49_length_560_mean_cov_9.375**

TGACTGTTTAACACCCTTACTATGACCTCACTACCTACTTTATTCTCAGATGTTCATTGTTATCTTCACCTCCTTATCTTTATCCTCAA
 >chr1:105956397-105956654 - E=3e-138
TTTCCTGTGTATTTACTTTATTTACTTAGGAAACAACCTCCAAATCTAGCTAAACTTACTTAAAAAAAATGAAACTCTCTCGAATAAAT

TCTTTTGAAATGAAAGCAAACCATAGTAATCGGTTTTATTTTCATTTATGACAACAAAACTCAAGAAGCCCTAAAGC|T|TTCCAAACT
 >chr1:105
TTTATGCTCTGCTTCCCTTTTAAAACTGAATGCCTTTAACAGCACCTAAGTCACTCCTTGAACACTTTGTCACTTAGAAATTTCTTCTG
953482-105953787 - E=7e-169
CCTGATACCCTAAATTATCTCTGTCAAGTTTAAACAAATCTCTAGGGCAGGGGCAAAATGCCACCAGACTCTTTGCTCAAACATAACAA

GACTCACCTTTGTTCTAGTTCCCAATGAGTTCCTCATTTCCATCTGAGACCACCTCAGCATGGACTTTATTGTCCATATCACTATCAGC

AATTTGGGCAAGCCCATTCAACAAGTCT
