# Supplementary material for: Chromothripsis during telomere crisis is independent of NHEJ, and consistent with a replicative origin
Source: HighWire-hosted journal article supplement (doi:10.1101/gr.240705.118), 2019-03-14
Supplement: Supplemental_file_1.zip [file contig.2.DB49_length_676_mean_cov_12.9127218935.docx]

**DB49_length_676_mean_cov_12.9127218935**

CTTCAGCGTGAGGCAGGCTCGTTTGCCCCAGCTGTTTCTCTTAAAAGTTCTCCGATAAGTCATTGCCACCACTACTTCCAAATAGCGTA
 >chrY:59018293-59018588 - E=1e-135
TGTTAACTTTGAGTTAATTTTAGATAATCTCGGGTTAATTTAAACAATTTTGGCACCAACAACATGGTTAGGCTAGTCAGCTTGGATGG

GTATAGGAATCCGTCAATCTGGGTTGCTGTGTACCAGCTCTGGGACTGGGGGCAAGTTGTAGCAGCCCTCAGCCTCCTGCTTCACCTGT

ATCAGGGGAGGCTGAGACCCACCT|TGCA|CAGGTGAGTTAATGTCATGCTTCTCAAAGTATGGCCTGTGGAAGGAGCAGCCTGGCGCT
 >chrY:59016859-59017203 + E=4e-174
CCCTTGCAGTATTTTTGACAGAAATGCAGACCACTGGGCCCCACCTCAGGAGTGTGGAGTTGTAGCCGGATCCCTTTCACTGGCACATT

AAAGTTAGAGCCACCCTAGGTTAATACACATCACTGACCGGCCTCAAGGAATAGGAGTGCTGGGTCTATCAGTCTCTCCCAACCATTCC

CTGGGCTTTGCCAAGTGCTTTCTGCCTGCCGAGCTCACTCTTGGATCAGATGGGGCCTCCCTGCCAGCAGTTCTACCTCATCCTCTCTG

CACCTAATTCAACT|TCTGAGGTCACATACGTCACGTCGGGTCTCGACCGCCTCTC
