# Supplementary material for: Chromothripsis during telomere crisis is independent of NHEJ, and consistent with a replicative origin
Source: HighWire-hosted journal article supplement (doi:10.1101/gr.240705.118), 2019-03-14
Supplement: Supplemental_file_1.zip [file contig.2.DB49_length_739_mean_cov_5.23951285521.docx]

**DB49_length_739_mean_cov_5.23951285521**

TTTTTTTTTTTTTTTTTTTTTTTTTTTTTTTTTTTTTTTTTTTTTTTTTTTTTTTTTTTTTTTTTTTTTTTTT|TTTTTTTTTTTTTTT
 >chr7:107410604-107410739 + E=1e-38 p=0e+00 >chr8:11880026
TTTTTTTTTTTTGAGACAGAGTCTTGCTCTGT|TGCCTGGGCTGTAGTGCAGTGGCACGATCCGGTTCACTGCAAGATCCGCCTCCTGG
1-118800927 + E=0e+00
GTTCACGTCATTCTCCTGCCTCAGCCTCCCAAGTAGCTGGGACTAAAAGTGCCCGCCACCACGCCCAGTTAATTTTTTGTATTTTTAGT

AGAGACAGGGTTTCACTGTGTTAGCCAGGATGGTCTTGATCTCCTGACCTCGTGATTCGCCCGCCTCAGCCTCCCGAAGTGCTTGGATT

ACAGACAAGTTCACTGATTCTTTAGTCTGCTACATTCAGTCTGTTGTTAAACCCATCAAACAAATTATTTCTGATATTTCTATAGAATT

TCCATTTAGGTCTTTTCTATCTTTTCATGTTTCTGCTTAAACTCCTCAGCTTTTCAATAATGTTGTGCATTGTTCTCACTAGATTATTT

AACATATTTATAACAATTATCTTAAAGTTATTTTCTGCTAATTCCAACAGTTGGGTTGTATGTGGATCTCCTCTATTAATTTTTTCCTC

TTTATCATAGGTATATTTTTCTGTTTCTTTGTATGTCTTGTAATTTTGTATTATATACTAGAAATTGTGTTTAAAAATGATAGTTATGA

CTACAGTATTTCTGTGCTCAGAAAATATC
