# Supplementary material for: Chromothripsis during telomere crisis is independent of NHEJ, and consistent with a replicative origin
Source: HighWire-hosted journal article supplement (doi:10.1101/gr.240705.118), 2019-03-14
Supplement: Supplemental_file_1.zip [file contig.2.DB49_length_788_mean_cov_12.0596446701.docx]

**DB49_length_788_mean_cov_12.0596446701**

TCTTTATATCCTCTGATTAACAATTTTCATTAGTAATGTGTTACACAACCAGTACTTGTTTAGACTAACCTACATTTTACCAATTTCTT
 >chr10:38984295-38985018 - E=0e+00 p=2e-02
TGCACATTGTTCCTTCCTTTTTGGTTCTATGTCATATTTCTAAAGCATATCTTTCAGTAGATTTTTCCCTGGTAAAAAATGGCATATGT

TCTTAAATGTATTTGTTTGACAATATCTTTCATTTGTCTTTTGTTTGAGTGACAGTTAACTGGCTACAGAATTCAACATTGAATGATTT

CTTTATCTCTGTACTTTGAAGACTTTATTTATCTTCCATCTTCTATTGTTGCTGATAAGTACTGAGAATCTGCTCTATTGTTTATTCGA

TTATGATTAATCTCTTTTTCTCTGTCTAGATTCTTTAAGATTTTATTTTTGCCTTTGGTAGTCTATAGTTTCTCAACATTTTATCTAAG

TATCTATTTTTACTTAATCCTGATTAGAACTCATTTGACTTCCTGTGTCCAAATCAATAAAAACCCTAATCAATTCTGTAAAGTTTGAA

GCCAGTTTTCTTCTCAAATATTATATCTTCTTCATTCTTTCAATTATGTTTCTGAAACTACTATTAGTTGTGTTTTAGATCTTTTCCAT

AATCTAAATCTCTCATTTTCCACCTCATTTTTTTTTGTGTGTGTGCTATGCTCTTAAGTAATTTCCTCATATCTACTACTTTGCTGTGT

TCTCTCTTC|TGCCATTTCTCGACTGTTATTTGGTT|TTTTATTGGTTTTTTTTTTATTTTATTTTATTTT|TCTGTTT >chr10:80254970-80255004 - E=1e-02
