# Supplementary material for: Chromothripsis during telomere crisis is independent of NHEJ, and consistent with a replicative origin
Source: HighWire-hosted journal article supplement (doi:10.1101/gr.240705.118), 2019-03-14
Supplement: Supplemental_file_1.zip [file contig.2.DB49_length_797_mean_cov_12.0225846926.docx]

**DB49_length_797_mean_cov_12.0225846926**

GCAGGAGATCTTTGGGTCAGTGGATTCAAGAAGGTAATTATTCACTGAGGTGCATTTCGTACACTTGGTCATGCCTTACCCTTGGGCAT
 >chr6:125988798-125989136 - E=2e-185
TGTATGTGTTGAATCATTTTCTTTTTATTAGCCATGAAAATAATCACTCTGTGTTGGGCTGTCATTGTGTTCTATTTTTCTGGGATTTT

AATTTTTTAAAAATTGCCTTTCGCTAACTTGAAAACAATGTGTTTTCAGGCTCCAGGTTGTCTGCTCACTAGTGAGTGGGGTCTTGGGT

CAGGTCATTCAGATTCCCACAGGATTCATTACTCACCTACATTGTGGTCTGCCAATGCACACCATAT|ACCA|TTGAAACAAGTCAGTA
 >chr6:126298589-126
ACAAAATATTCACATAACTGTATCACAGATCTTAGGAAACAGACATTCAGAAAAGATTTAAGGCCACTAAGTAACAGCCTCTCATAAAA
299027 - E=1e-236
CCCAACAAATCTTAAAATTGCAATTAGACTTAAAAGGGACCTAAATACCACTTCATGCTGAACCAAGATTAGAAAAATCTTCCACTCTT

GACATTTTCATGTTCTTAGTTTTTCAATCAAGTGATCAGCCTGTAATTAAAAAACATACTTTTTAATTCTAGATATCATAGTCTCTATC

AAATAATTCTACTGGTATCCCTATTATAATATGCCACATTAGAAGAGTTGAGTACTATATATTCTGTTCCTAAAAATATCTTACAAAAA

AACTCAGTATAATATCTATATATAAATATTTTACATTGTATATAAATAAGCAGATTTTTGCC|AACAATTCAAATTCAATACTAAGTA
