# Supplementary material for: Chromothripsis during telomere crisis is independent of NHEJ, and consistent with a replicative origin
Source: HighWire-hosted journal article supplement (doi:10.1101/gr.240705.118), 2019-03-14
Supplement: Supplemental_file_1.zip [file contig.2.DB49_length_871_mean_cov_16.0792192882.docx]

**DB49_length_871_mean_cov_16.0792192882**

CTTCTGTTTTTTGAGTTTTTGATTATGACCATT|AACTGAAGAAAGACAAACTGTAATAACTGCTTGAGATTAG|CAAACTGTCAAGTG
 >chr21:29458107-29458140 + E=6e-05 >chrY:5901612
AATATAGACAGCAATCTGCAGTTTGAAAATGCCAATCACTACAAATCACAGGAAAAACATCTGTGCTTCAGTGGAAACACTACATTGTT
1-59016918 + E=0e+00
TAGATCACACTCCTTCAGACTTTTGAGATAGGATCTCCATCACCCAGACTGGAATGCAAGGGTATGATCCTGGCTCACAGCAACCTCCA

CTTCCCTGGCTCAAGGGATTCTCCCACCTCAGCCTCCTGAGTAGCTGGGACTACAGGCTCATGCCATCATGCTCAGCTAATTTTTGGAA

ACTTTTTTTGTAGAGAGAGGGTCTATGTTGCTCAGGCTGGTCTCGAAATCCTGGGGTCAAGTGATCTGTCTACCTCAACCTCCCAAAGT

GCTGGGATAACAGGCGTGAGCCACTGCACCCAGCCCCTTTAAGGTTTTCTAGTCTAGCCTTTCACCTGTTTTATGGTATGTGAAGTTGA

AAAGAACTGATAATGCAAATGATTCTTGTTTATAAACATGCAAATCAACCTGCCTTGGAAAGCCAATCCTTCTCCATGTGGCAAAGCCA

CTTATGCATCAATTTCCAGTTTATTTCAATATTCTGAGTAATAGATGTGTCTGTCCCTTTGGGTTCCCTTTTGAACTGGTTGTAACATC

TCACTGCTCATTTCATTAATAAAATATTTAACATTTATATTTATATGAGTGATGGTTTTTCCTGTTTTTGAAAAGTTACCCTTTAACAA

ATATAACATGCACAGGTGAGTTAATGCCATGCTTCTCAAAGTATGGCCTGTGGAAGGAGCAGCCTGG|TGCTC
