# Supplementary material for: Chromothripsis during telomere crisis is independent of NHEJ, and consistent with a replicative origin
Source: HighWire-hosted journal article supplement (doi:10.1101/gr.240705.118), 2019-03-14
Supplement: Supplemental_file_1.zip [file contig.2.DB49_length_928_mean_cov_9.19612068966.docx]

**DB49_length_928_mean_cov_9.19612068966**

AGGCCCAGAACAAGAAATTCTGTTTAGCATCTGGAGATCTATGGCCAGGCTGGATCCAAATGGATTCCAGTTTAGAGGGCTGTCCACTC
 >chr3:5048831-5049312 + E=7e-245
CTTGGCAAAGTCCTGTTTTCTTAACCCTCTCTTCCCTTTGAACAGTGATCAAGGATCCTCCCAAGTCCTTCTCTAATCCCTCGTAGCCC

CACTAACAGCCATCACAGTCAGACACCCTCCTCAGAGAGCCATTTCTCCTCCTTGGTCTTTCTCTTCTAATTTCCACTCCTGATATCTA

GCTAGCTACTTCTTCTAAACATGTCAAGGGACCTAGTTTCCAGTTCTGCTCTGGCTCTTACTCAGTGGCTTCTAGTAATTTCCAGCCCT

TCTCTGTGCCTCAGTTGCCCCATTTGTAAAATGGGGCCCCAAAAGGTTCCTTTCGGCTCTGACATTCTAGGATCCAAAGTACAGAGATT

AAGCCACAAGAATCCCTACCAGAAGGTAGGG|ATTCAGACATAAATAAGTATTGGTTCATGCTACAACATGCGTGAACCTTGAAAATAC
 >chr3:4496420-4496872 + E=6e-260
TATATTAAGTGAAAGAATCCAATCACAAAGGGCCACATATTGTATGAATCTATTCATATGAAATGTCCAGAATAGGCAAATCCAAAGAG

ACACAAAGTAGATTAGTGGTTGCCAGAGGCTAGGGGGAGGCAGGAATGGGGAATGATTGCTAATGGGCATAGAGTTTCTTCTTGAGATG

ATGAAGTATTCTGGAATTAGGCAGTGATAGTTGTAACACCTCATAACTATATTAAAAACCACTGAATTGTACATGTTGAAAGAGTGTAT

TGCATTCTATATGAATTCTATCTCAACTTTTTTCAAAAACCACAGGCCTTCAACCATACCATCTGTCAGAAATACACTCTTTACAGACA

CAATGTCTTATTTTCAAATCATTTGAGTGAGCCAATTAA
