# Supplementary material for: Chromothripsis during telomere crisis is independent of NHEJ, and consistent with a replicative origin
Source: HighWire-hosted journal article supplement (doi:10.1101/gr.240705.118), 2019-03-14
Supplement: Supplemental_file_1.zip [file contig.2.DB50_length_270_mean_cov_3.35555555556.docx]

**DB50_length_270_mean_cov_3.35555555556**

ACTTATATATTTTAATGTTTTGTTTTTTGGG|ACCCAGCCAGATCTGCTGTTAGAGGAGAATTCTTCTGTCCTAGCTGTGTCTCTGTGA
 >chr4:124573935-124574122 + E=2e-98
TCTGTGGATGAGGGTAGGAAAGCACCACTCAGTCAATTGGGGTGTACAAAATGGAGTTTGAGAAGGTAAGTGATGTTTTCTCCATGCTT

TCTGTTCAAAATTAAGTGCAATTAAATGCTTTTTTTTTTTT|GTTTTGGT|GTTTCACCCTGTTTCCCAGGCTGGAGTG|TAATGTGTA
 >chr2:28028784-28028812 + E=2e-02
ATGTTGG
