# Supplementary material for: Chromothripsis during telomere crisis is independent of NHEJ, and consistent with a replicative origin
Source: HighWire-hosted journal article supplement (doi:10.1101/gr.240705.118), 2019-03-14
Supplement: Supplemental_file_1.zip [file contig.2.DB50_length_276_mean_cov_4.34782608696.docx]

**DB50_length_276_mean_cov_4.34782608696**

AGTTAAGAGTGAGAACATGCAGTGTTTGGTTTTCTGTTCTTGTGTTAGTTTGCTGAAAATGATGGTTTCCAGC|AAAATTAT|ATTTTA
 >chr18:35848445-35848518 - E=1e-26 >chr1
TCTAAAATATAATTATTTCAACATATAACCAATATAAAATTATGAATGAAATATTACATATTTTTCATACTAAGTCTTTGAAATCCATT
0:27193331-27193526 - E=2e-106
GTGCATTGTATAGTTCAGGTACATCTCAGCTTGGACTAACCACATATCAAGTGTTCAATAGCTACACATAGGTAAGTGGCTACTGGTTT

GAACAGAAACG
