# Supplementary material for: Chromothripsis during telomere crisis is independent of NHEJ, and consistent with a replicative origin
Source: HighWire-hosted journal article supplement (doi:10.1101/gr.240705.118), 2019-03-14
Supplement: Supplemental_file_1.zip [file contig.2.DB50_length_278_mean_cov_4.71942446043.docx]

**DB50_length_278_mean_cov_4.71942446043**

TCTGAGTCTCGCCGTTCGGGC|TTTCCTACCAATCCCGGCAGGATCACCTTCACTGGTGCTGTGAATGAAGGAAACAACTAACTTCCTT
 >chr4:82515266-82515397 + E=1e-64 p=0e+00
TCACAAAGCATAAGAACATTTTCATTTTCTCCTTTCTCTCTCTCCCTG|TTTTTTTTTTTTTTTT|AGAGATGAGGTCTCACCATGTTG
 >chr4:82515433-82515554 + E=1e-52
CCCAGACTGGAGTGCAGTGGCTGCTTTCAAACAATCCTCCCACCTCAGCCTCCTGAATGGCGGGGATTACAGGCCCAGGTCA|GAGGCC

TGGGTGTCTTTTTTT
