# Supplementary material for: Chromothripsis during telomere crisis is independent of NHEJ, and consistent with a replicative origin
Source: HighWire-hosted journal article supplement (doi:10.1101/gr.240705.118), 2019-03-14
Supplement: Supplemental_file_1.zip [file contig.2.DB50_length_289_mean_cov_3.63321799308.docx]

**DB50_length_289_mean_cov_3.63321799308**

GTGAGCAAGGTGCAGGGCACAGGGACAACATGGGATGCAGCCCGGGCTCCATTTCCCACTGGCCCTCCATGAAGGGAGTGGCACCCACT
 >chr17:74145358-74145587 + E=7e-127
TGAAGAGGGAAATAGACTCAAGCAGAGACCAGGCGCATGTGCAGCTGTTCTGACGGGAGAGAGCTGGCCACAGGAGCAATGAGGCGCCA

AGACGGCCAGTGGTATCTCAGCCCCAGGATAGAAAGCTGAACTTACAG|CTG|GCACAAACTGTGAGCCCACCATAATCTCTAAATAGC
 >chr17:74146358-74146421 + E=1e-26
TGGCTCCACAAGTCACCCTAGGGA
