# Supplementary material for: Chromothripsis during telomere crisis is independent of NHEJ, and consistent with a replicative origin
Source: HighWire-hosted journal article supplement (doi:10.1101/gr.240705.118), 2019-03-14
Supplement: Supplemental_file_1.zip [file contig.2.DB50_length_298_mean_cov_7.22147651007.docx]

**DB50_length_298_mean_cov_7.22147651007**

TACGTCTTTCTCCCAGGCTGGATGCTTCCTGTCCTCAAACATCAGACTCCAGGTTCTTCAGTTTCGAAATTCAGACTGGCTCTCCTTGC
 >chrX:142003967-142004171 + E=2e-90 p=0e+00
TCCTCAGTCTGAAGACAGCCTATTGTGGGACCTTGTGATCATGTGAGTTAATACTTAGTAAACTCCTACATATATATACACATATATAT

GTATGTGTATATATACACATATA|TAT|GTATGTGTATATATACACACATATGTGTGTGTATATATACACACATATGTGTGTGTATATA
 >chr13:82820438-82820528 - E=6e-23
TATACACACATATGTGTGTGTATATATATACA|C
