# Supplementary material for: Chromothripsis during telomere crisis is independent of NHEJ, and consistent with a replicative origin
Source: HighWire-hosted journal article supplement (doi:10.1101/gr.240705.118), 2019-03-14
Supplement: Supplemental_file_1.zip [file contig.2.DB50_length_301_mean_cov_1.90365448505.docx]

**DB50_length_301_mean_cov_1.90365448505**

CCCTGAAATGATATTTCTCTTATCAGTGGATCTTCCCCCTGGCTGCACTTCAGAATCCCGGGGGAGCTTCAGCAAATACCACGGCCGGG
 >chr10:126552335-126552538 + E=5e-105 p=1e-02
GCCCAGCCCTGGGGCTTCTGGAGTAGGGCTGGGGCCCATCCCCGGGGCTTCTGGAGCAGGCCTGGGGCCACTGGGAGGGTTCAAGAGCT

CAGCAGGTAATTTTATTTATTTTTT|TATTTTTAGTTTTTTTTTTACTCTGGCTTTAGTAT|AGTGGCACGATCTCAGCTCACTACAGC
 >chr10:126552573-126552636
CTCCACCTTCTGGGTTTAGGCGAGTCTTCTGCCTTA + E=2e-14
