# Supplementary material for: Chromothripsis during telomere crisis is independent of NHEJ, and consistent with a replicative origin
Source: HighWire-hosted journal article supplement (doi:10.1101/gr.240705.118), 2019-03-14
Supplement: Supplemental_file_1.zip [file contig.2.DB50_length_335_mean_cov_4.31641791045.docx]

**DB50_length_335_mean_cov_4.31641791045**

TGACTTCCATTTGTGAAAGTAGAAGA|CTAATATCATGGCTGTTTTCTATGCTTACAAGAAAGGAAACCCACAAAATGGAAGGATCCTT
 >chr10:8380222-8380248 + E=3e-04 >chr10:7336125-7336434 + E=2e-175
CCAATAAAAAGCACGCCAACTCACCCAGTGCATCTGTATGGGATAAAAGGATGAGACGTAAACCCTTGGTCCATGTACATCTCACCTTC

CTCCAGTGAAACCTCATCCTAAACCTGTAATATATGATGTTGTAGAATTTATCTCTGACCCTAGCATGTAACAGTAGGACTGGGCAGAA

CCCACCTTGCATTGTACAAGTATCTAGACTCTATCTGGACAGCCATGTGCCCAGCTACATCTATTTCCA
