# Supplementary material for: Chromothripsis during telomere crisis is independent of NHEJ, and consistent with a replicative origin
Source: HighWire-hosted journal article supplement (doi:10.1101/gr.240705.118), 2019-03-14
Supplement: Supplemental_file_1.zip [file contig.2.DB50_length_471_mean_cov_6.23566878981.docx]

**DB50_length_471_mean_cov_6.23566878981**

TCATTGACACACACTCATGCCTTCGTCACATAATCAAAGTATGAGAGCATTTTGGTCATTAGAGTAGCGGCCAGTAGAGTAAGATGAAT
 >chr10:7326443-7326644 - E=2e-106
GTCTGGGAAACCGTCATGGTGTAAATTGAATGCTCTGTATTAGAATTATCTGTCTGTTGGAAAAGTAGACCGTTTGCTACCACGTTTTC

TAGGTTCAGGCAAATTTGGGTAG|G|TGTGACGAGGGAACGTTCGGCTACTCCTGGAAGATTGATGGGCTCCATCAGCAACCCACAGCC
 >chr10:1728518-1728765 - E=4e-134
TTGTTTCTTATCACGCAACCACCATTAGACCTTCCCCTACTTTCACACAAATTAACTGCTCATCAGTTTCCTGATTGCAAGAGCTTGCG

GCAGCTGTAGTTTTCAAGGTATGCTTCCTTCAAACCTATTTGGTTCTCACTCTCCCAGCACATGATCCTGTCCTTGTTCGACTCAATTG

ATTCAT|GCGAACCGGTGGAGGACCGAGC
