# Supplementary material for: Chromothripsis during telomere crisis is independent of NHEJ, and consistent with a replicative origin
Source: HighWire-hosted journal article supplement (doi:10.1101/gr.240705.118), 2019-03-14
Supplement: Supplemental_file_1.zip [file contig.2.DB50_length_481_mean_cov_5.32432432432.docx]

**DB50_length_481_mean_cov_5.32432432432**

AGGGCCCCCTAGATGGGGGGCGAA|GAGGGATTCTGGAACCCCTGACGGTAGTCAACGAAGGGCAGCATACAGGAAATTGGCAGTTAAC
 >chr10:1370443-1370696 + E=1e-131 p=4e-02
AGCAGTGGAGGGTGGAAGGGATAGGACTGCAAAATGGCATTGGCCTCGAAGAAAGGCTCTTAAGGGTGGAAAAGTGGGTTTAGAAGTTG

TGTTAGGGAATTGGTAGACACCACGCCAATGTGATGAAATGAGCAGACACTACCTGAAAATCAACCACGTAACGTTCAGTTATTCCATG

CAAACCCGC|GT|GATTCTCCTGCCTCAGCCTCCCGAGTAGCTGGGATTATAGGCACCTGTCACCACGCCCAGCTAATTTTTGTTTTTT
 >chr10:2858686-2858892 + E=2e-109
TAGTAAAGATGGTAATTCAGCATGTTGGGCTGGCTGGTCTTGAACTCCTGACCTCAGGTGATCTGCCCTCCTCAGCTTCCCAAAGTGCT

GGGATTACAGGTGTGAGCTGCCACGCCCAGCCCTTTTTC
