# Supplementary material for: Chromothripsis during telomere crisis is independent of NHEJ, and consistent with a replicative origin
Source: HighWire-hosted journal article supplement (doi:10.1101/gr.240705.118), 2019-03-14
Supplement: Supplemental_file_1.zip [file contig.2.DB50_length_481_mean_cov_11.7546777547.docx]

**DB50_length_481_mean_cov_11.7546777547**

AGGCCTTTAAATGTGCCAACTCAAGGAGCCTTGGTTGCCCCCTCAGGAAGGGTGCTGGTTGGGGAATTTCAAGGATTGTGTGAGAGGGT
 >chr11:72356359-72356493 - E=5e-69
TTTTCTGAAAGGGCTCTGCACTCTACCAAGCACTGGAAGAAA|GCA|TGGGCAAAGGCCTGGAGGTGAGAGTCAGTCAGTCATTGATGT
 >chr11:72354773-72355123 - E=3e-196
GAGAAGAGCAAGAAGTAGAAATGTAAGGAATGGTGGGGAGGGGAGTCAGAGCTGGATGACCAAGCAAGGGTTCAGCTGTAGAGGGTCTG

GCCCGCCAGGCTCAGGGCTCGGGCTTTATTGTGCTGGTGGTAGGGAGCCACTGAGGGTGAGTGGGGGAGAGCATGCCAGAGCATGCCTC

AGAAAGAAAGGTGGGAGAAACGCTGGCATGGAGGGCCGCCCCCTGAGTTGGTGGGGTGGCCGGGCTCTGCCAAGGCTATGTGCCAGCTG

CCTGGACTGTGTCCAGGAATGGGCACAATGACTCAACA
