# Supplementary material for: Chromothripsis during telomere crisis is independent of NHEJ, and consistent with a replicative origin
Source: HighWire-hosted journal article supplement (doi:10.1101/gr.240705.118), 2019-03-14
Supplement: Supplemental_file_1.zip [file contig.2.DB50_length_504_mean_cov_5.55158730159.docx]

**DB50_length_504_mean_cov_5.55158730159**

TATCCCAAGGCGGCTATTTCCAGTTCCCC|CCCCCGTCCCCCGCCATGTACACCAAAATTGGCAAGTTCTCAAGTACCTTATAAAAAAT
 >chr20:45616610-45616857 - E=3e-123 p=0e+00
GGTAGAGTATTTGCATATAACCCACATACATCCTCCCATATACTTTAAATCATCTCTAGATTACTTATAATGTCCAACGCAATGTAAAC

ACTATGTAAACAGTTGTTATATGCATTGTTTTAAAACATATATTATTTTTATTCTGTATTTTTTTTTGCCCC|ATATATATATATATAT
 >chr20:48594792
ATATATATAT|GTACATATATATATATATATGTACAGCCCTTTATGTATTACAAATAGGAACCTCCACACTAACCTACACCTTGCTATA
-48595047 - E=7e-133
GTAACATTTTTTTGTTTTGAATCGTCATCACATGGGTAATGCTATAACAATATTCAGTGTTTTGAAAATCATTCCATATCATTACACGC

AGCTCCCTTAGTTTTCTGCAGGGATGCGGACTATTCATTGTATGGATTATAGCACAATCACA
