# Supplementary material for: Chromothripsis during telomere crisis is independent of NHEJ, and consistent with a replicative origin
Source: HighWire-hosted journal article supplement (doi:10.1101/gr.240705.118), 2019-03-14
Supplement: Supplemental_file_1.zip [file contig.2.DB50_length_531_mean_cov_10.1148775895.docx]

**DB50_length_531_mean_cov_10.1148775895**

AGCTGCTGCTTCCAGGACCCTAAGGGGTGTGGAATCTGAGTGACTCTCTCTCCTTCCCTGGCCTTTTGCTTTGGGATTTGCCCGTGGGG
 >chr10:126690162-126690399 + E=5e-131
CAGCCCCACCCCACTGCGTCCTGACCCCTGTGAGTGTACGGGCAGCTCCCTGCTCGCCCGGCTCCCCAGCCCTGCTCCTGACACCAAGA

CCCACCCAGTGCTTCCGGTACCTGGGTGCTGCCCCGACTGGCCGTGAAGGATTCAACTA|TAACGAGCAGCCAGAGTTGAGATGGCTAG
 >chr10:126552832-126553126
TCTAAGCCTCTAGTCATTCAAATGTTTAGCCTGTTGAGGCTGGAAGAGCTCCAGAGACCCTCCGTCTGGCCCTCATCTTACACGGGGAG
+ E=2e-165
ACTGAGGTCTGCGAGGAGCCCGTGGGCTGGGAATGACAGTCTCTGTTTCCTGCCCCGCCTAGGACCTGAGACCACATTCCTTTTTTAGA

GCACAGCGTGGCAGTGAGCCAGCATCTCAGCCCCAAAACAGGTCAGGCCAGGGAGGAGTCCAGGCCTGGTGACCATAGCTGCTGTCA
