# Supplementary material for: Chromothripsis during telomere crisis is independent of NHEJ, and consistent with a replicative origin
Source: HighWire-hosted journal article supplement (doi:10.1101/gr.240705.118), 2019-03-14
Supplement: Supplemental_file_1.zip [file contig.2.DB50_length_553_mean_cov_8.67992766727.docx]

**DB50_length_553_mean_cov_8.67992766727**

TTTGTCGCAAATGGAGTCTTCAGGAAGATATCCAGTCTGCAATAGCAAATGTGGAGGCCAGACTAAATGGAACGCCCCTGAGGAAATTA
 >chr16:17191517-17191808 + E=2e-163
TGGATGTAGCAGCAGTCCAGTTCACACGCTCATTCATTCATTCATCAAACACTGGCACAACATCTTACATTGTCAAGGCATGTAATGTG

TGCCGAGAATATAGACACTGTCCTTGCCTTCAAGGAACTTTCACCTTTGGAGTGAGAAGGCGAAAATAACTGATATTTACTGAGCTCTT

TCTGTATGCAGATACTAGGCTAT|C|AGTGTGGAGCCTGGAATACTGATGCTCCAGAAACGTGGAGAGAGATGCCGCTCTTCATGGCAG
 >chr16:17192547-17192810 + E=1e-146
GTACGCAGGCCTTGCTTCCTGCAGCAAGTTAAAATCATCCACCATCATTAGCAAAGGGCTGTTACAAGGGCCTTTTTAAAGTGTCCTGT

GCCCAGGCTACAAGGAGCAATCCATCATGTTCCATAAGCATAAACACTCCACAGCTAATTAAGTGAGGGTGAAATCATCTGCACCATCC

ATGTGATATTTATTTAAAATG
