# Supplementary material for: Chromothripsis during telomere crisis is independent of NHEJ, and consistent with a replicative origin
Source: HighWire-hosted journal article supplement (doi:10.1101/gr.240705.118), 2019-03-14
Supplement: Supplemental_file_1.zip [file contig.2.DB50_length_568_mean_cov_8.25176056338.docx]

**DB50_length_568_mean_cov_8.25176056338**

GTCACTGCTGATAGTATGATAC|TTGGCACAACCACTTTGGGAAACCATGTGGAAGAATTCTTAACAGCTCAACAAATCCACATCTTAT
 >chr22:48521103-48521314 + E=3e-112
GCACAGCAATTTCATTTCTAGGTTCACGTCTCACAGAAACGCATATGTGAGTTCTTCTAAAGACATGAAAAGTTTATAAAGGCACTATT

CATTACCACATAACTAGGAATTTCCCAAACGCCCATCAATAATGGAACAGACACAT|AAATTAGCCAGGCATGGTGGTGCATGCCTGTA
 >chr22:48524029-48524365 + E=9
ATCCCAAATACTTGGGAGGCTGAGGCAGGAGAATCACTTGAACCCAGGAGGCAGAGGTTGCGGCGAGCTGAGATTGCGCCATTGCACTC
e-186
CAGCTTGGGTGACAAAGTGTGTCTCTGTCTAAAAATAAAAAAAAAAAGAATCAACTCATATAAAGAATGTATACAAGAAGTCCTTTATC

ACAATAGTAAAAGCAAAACAGCCCAACATAAAAGTGACCCAAATACATGAGCAGTTATTGTACACAAAAGGAAAAACGTAGAGGCTGTA

GACAGATGAAGAGATGTTCAGCCTCATTAGTCAATA
