# Supplementary material for: Chromothripsis during telomere crisis is independent of NHEJ, and consistent with a replicative origin
Source: HighWire-hosted journal article supplement (doi:10.1101/gr.240705.118), 2019-03-14
Supplement: Supplemental_file_1.zip [file contig.2.DB50_length_626_mean_cov_12.3514376997.docx]

**DB50_length_626_mean_cov_12.3514376997**

GTCATGGTAGAAGGTTGGTCTA|CATCCACCTCACCTTTGTGATCTTCTGAGGGAGCCGCAGCCAGTGTGTAAGGGAAGCAGGGGTAGA
 >chr16:81497684-81497958 + E=4e-150
GACAGTAGCTTTGTCATTAGTCTCCGCATTTCACAGGTGAGAAAAGGAGTCTCCCAGGGGAAGTGGCGTGGGCACAGTGAGAGGTGGCT

GGCTAAGCCAGAGCTCTTCCTAGTGCCAGCACCTTCCTAGAATTAGCTGTGAGACTGAAGAGAGGAAAGATGACATCTGGTCACAGGCT

CCACATCTGGTCCGATGGGGCAGGTGCCT|T|AGTTTATACTAGCCTTTCCCACGTCAACTTGAAAACACTGCCCTTTGTTATGCAAAA
 >chr16:81396784-81397115 + E=2e-187
ATAATTGTATTGAACCAGAGGTAACAGTTCATTTTCTTGTTGTGAGCTATTATGGGTTAAAAAGTGAGGATTTTCTGATGAACTCACCA

TGTATTTCTTAAGTTTGTTTTGAGAAGTGGCTTTGGCCTCTCTGGCTGTTGTGCTGGAAGAGTGGGCTGTTAGGGAAGCCAGAAATCTT

TAAGAAGCATTACCGGAGAAATGGTTTTGAACGTGGTACTTCCATGCTGGAACACTGGGAAAAAAGATTTCTCTAATTTTTAAAAATAG

TTTCAA
