# Supplementary material for: Chromothripsis during telomere crisis is independent of NHEJ, and consistent with a replicative origin
Source: HighWire-hosted journal article supplement (doi:10.1101/gr.240705.118), 2019-03-14
Supplement: Supplemental_file_1.zip [file contig.2.DB50_length_635_mean_cov_5.1968503937.docx]

**DB50_length_635_mean_cov_5.1968503937**

TGATCAATTTTATCAATCAAGCCAGTCTGTGTTACGTACAAAACTACACAATCTATTTACTATTTACTGCGTGCCTCTAGGATTATTCA
 >chr4:19170938-19171168 - E=1e-126
ATATCTGTATAATGTGGCAAGGATGCAGATATAATAGACATGGTCCCCTCCTTGAAGGAAAACATTGCAATGTATCTGAATTATATGTG

TGGACATCAGAGTATCCCTTTCTCAATCACATGTTGATATTCTTTTCTTTTT|ACATTTTTA|CAGAATGTTCAATCTGTACTTTGTGA
 >chr4:19168898-19169294 -
ATGGTGGCTTCTCTTTTGACCCAGGTAATGAGCTGTTAACTCTTTAAGAAGAATACAACACAGCTCCATGGAGGCCTCTCTGGCCTAGG
 E=1e-226
AACAATGCTAGGCATTATGCATACACTATCTCACCTTATCCTTACAACAAATTTACAACATGGGGCCAAGGGACAAAATGAGAAGTGAA

GTGACAAAGTCTAGGTTGCTTCCTGAGGTCACACATAAAATGAAGAGCCAAGCTGGGCTTCAGACTTAGGAATGTCTGCCTTCAAATCA

ACACACCTCCCACAATCTTAAACTCTCTTCTCAGAGTAAGGTTGTTATTTAGATAGATTTTTCATATATTGCATGTTTCATTGTGTTGA

TTAATTCAATAAAA
