# Supplementary material for: Chromothripsis during telomere crisis is independent of NHEJ, and consistent with a replicative origin
Source: HighWire-hosted journal article supplement (doi:10.1101/gr.240705.118), 2019-03-14
Supplement: Supplemental_file_1.zip [file contig.2.DB50_length_637_mean_cov_9.52904238619.docx]

**DB50_length_637_mean_cov_9.52904238619**

CACAATCACTCCAGAAATGAGAAATCAGGAGAGACGTCCTGGAGACAGGGAACTTCAGGTGGTCTTTGAAATCTGTTCAGTGTTGAAGC
 >chr10:1354457-1354735 - E=1e-150
CAAAATGTGATGAAGTGAAGAGAAACTCACATTCAGGCCACAGCAGAATAACTGAACCTGCTGCATCAGCCTCAGAGCCAGCCTGGGGC

CTGCCGGGGGCTCACTCTGACCTGGAGGTGGCCACAGGAGCTGCTGGAAGAAGGTATGGCTGTTGCCCTTTCTTCCAGAAAGTGCATCA

CCCCCACACCC|TG|ATTTCACCAAAGTCTCTATGATTTCCTGCTGCTTTGTTTATTAAGTCACTCATCAGATGTTGAATGGGGCCTAT
 >chr10:1352273-1352632 + E=3e-201
TTTGGACCGAGCACTGTGCCAGGTGCTGCTGTCACACTGAGTGAGCAGTCTGAAGGTGTTTGCATTTATGCAGAGGTACAACTTCTGAC

TTCCACCATGCCTGGCACTGAGAGACACTCCCAGATGTTAAAATATTCACCAGTCCTGGAGAAGCAGCTGGCACTGAGGCTCAGCACTC

CTGCTAACCTACGAAGATGTTGGAATCAATGAGAAAAACTTCATTGACTCTGAATAACATTCCTTCATTGACTCTGAATAACATTCCTT

CATTGACTCTGAATAA
