# Supplementary material for: Chromothripsis during telomere crisis is independent of NHEJ, and consistent with a replicative origin
Source: HighWire-hosted journal article supplement (doi:10.1101/gr.240705.118), 2019-03-14
Supplement: Supplemental_file_1.zip [file contig.2.DB50_length_663_mean_cov_10.2911010558.docx]

**DB50_length_663_mean_cov_10.2911010558**

AATAATATACTCTCTTCAAAAATGTACTTAAGATGTATACATAAAGTAAATGGATGTCAAAGATATACATTGCAAGCACTTATCCAAAA
 >chr5:27272167-27272500 - E=1e-188
GAACCTTGAGTAGTTATATTAACACAGTGTATACTGACAGCAAGTAATATTGCCAGAAAAAAAATCACTAAATTACATTATGATGAAGG

GGTCAATTCTCCATGAGAACACAGAATCCTAAATATGTATACATCCACCAAAAGAGTGTCAAAATGCTTGAAGCAAAAATTGATAGAAC

TGAAAGGACAAACTATAAAATTAGTAGAATATAGAAAACCTGAATAACGCTATAAAACACC|TTGTT|TGAGACATTACTAGAAGTGGA
 >chr5:27270882-27271217 -
ATTTCTATGTCAAATATTTATTAGGTTAAACACTTTAACATATGTGCCAAATTGCCCCCCTCAAAAAAAGTACCATTATATCTTTTTCT
 E=8e-190
AAAAATATATGAATGTCTATATCCCAGATTCTAGTCAACCTGCAAATTATCAGTTTGAAATATAATGTTAGGGAAGGTCTCATGGGCAT

GTCAGAGAGGTCAGCGTTGTACAGAAACTCACAGGTTTGATCTTACTTGTGCCACTATACTATAGTAATTCTTAAAAGAGAGAAAGAGC

TTGAACATCAGGTAAGTAATGTACTGATTTTGAACCATTATA
