# Supplementary material for: Chromothripsis during telomere crisis is independent of NHEJ, and consistent with a replicative origin
Source: HighWire-hosted journal article supplement (doi:10.1101/gr.240705.118), 2019-03-14
Supplement: Supplemental_file_1.zip [file contig.2.DB50_length_675_mean_cov_7.45925925926.docx]

**DB50_length_675_mean_cov_7.45925925926**

TGGGAGGCCAAGGCAGGCAGATCACCTGAGGGTCAGGAGTTCAAGACCAGCCTGGCCAACATGGCAAAACCCCATCTCTACTAAAAATA
 >chr15:76668080-76668437 + E=5e-203
CAAAAAATTAGCCAGATGTGGTGGCGGTTGCCTGTAATCCCAGCTACTTGGGAGGCTGAGGCATGAGAATCGCTTGAACCTGGGAGGCA

GAGGTTGCAGTGAGCCGAGATTGCACCACTGCATTCCAGCCTGGGTGATAGAGCGAGCCTCTGTCTCCAAAAGAAAAAAAATCTATTTG

AAGAGAAGGAGCTAGAGGCATATTCCTGCAGTCTGGTTAAAGGGCTTTACAGAGGACATTTGGGTTCCAGCCCGCTAGCCTGCCTTTTC

T|GC|CAATCATATTTAATCCTCAAATAGTCTTGTGAGGTAGGTGTTCTTAATCTCTATTTTACAGATGAGGAAATGGAGTCTTAAGTG
 >chr15:76670313-76670631 + E=1e-167
TTCAAATGACTTGTCTAAGGTCATACAATTTGAAGAGGTAATGTGATGGCTCAAAGTCAGGTCATTCTGACTCCAGCTTCAGGGGTCTA

ATGAGGATGCCTCCCTGTAACAGCTCTGTATTCTTGTGATGCATTCGAACCCAAATCATCAACATGTCTTATATCATCTTGTCTAACTC

TGCAGCCGGTCAGACAATTTATCTGTTTTTTTCTTCAATTCCTTTGAGCCTCCC
