# Supplementary material for: Chromothripsis during telomere crisis is independent of NHEJ, and consistent with a replicative origin
Source: HighWire-hosted journal article supplement (doi:10.1101/gr.240705.118), 2019-03-14
Supplement: Supplemental_file_1.zip [file contig.2.DB50_length_686_mean_cov_10.7113702624.docx]

**DB50_length_686_mean_cov_10.7113702624**

ACTGTTGGAGCAGAATTTTTTACCCTGGATCAATTGTGTGCCTTCCTGATGATACTTTAATAGAACAAGTGGGCACAGAGTGACAGATG
 >chr12:47809038-47809397 - E=3e-204
ATGACGGGAGGCTCAGACACAAAGTAGAACTACTGTTGCCTGGAGCCAAACAAAAATTATACCATTTAAAAACTCAGAATCCAAGAGCT

AATATGTTGTCCACAAAAGAACAAAAGGCAGAAAGTTTATGCTAAAATGAGGTAAGTTATAAATGTCAGTAACTCATAAAATGGGTATG

TCCCATTGGGACCTAAAGAGTTAATATATAAAAGGAAACAGATTGAGGTCAGGTAGCCTCATGAAAATCTCAAATGCTGTGACACAGAG

ACA|CCGACAACAGCAAAGCAAACCCAAACAGAACCCTCTCAACCTAAACAATCTTCCTTTCCCCTTTTAACTCTGAAGCTCTTATAAA
 >chr12:47808116-47808444 - E=9e-181
AAACAGATATTTCAAGGATGTCCTTTAAGCTAAATACAAACTAGAACATTGAGGTAAAACACAATTATCTGCCCTAAAGTAAAAATATA

GATTTTTAATATTTCCAATAAATATATTTCAAATCACCAGTTTGAGGTGTGGAATAAGTTCATATTTATTTTAGTGTTGAAACCATAGT

AAGTGGAAAAAAAAACCCTCTAGGTTGACAAGAAGACCAATCTTTCTCCTAGGATTTCCCTCCC
