# Supplementary material for: Chromothripsis during telomere crisis is independent of NHEJ, and consistent with a replicative origin
Source: HighWire-hosted journal article supplement (doi:10.1101/gr.240705.118), 2019-03-14
Supplement: Supplemental_file_1.zip [file contig.2.DB50_length_730_mean_cov_6.67123287671.docx]

**DB50_length_730_mean_cov_6.67123287671**

AAGGCAGCCAGAAAGCAGCGGCC|AGTTACCTACAGAAGAAATCCCACAGTCTAGCAGCAGACATTTCAGCAGAATCCTTACAAGCCAG
 >chr2:185971195-185971478 + E=2e-155
AAGAGACTTTCAGCATCCTTAAAGAAAAGAAATTCCAATCAAGAATTTCATATCCTGCCAAACTAAGCTTCACAAGTGAAGGAAAAATA

GAATCCTTCTCCAGCAAGCAACTGCTGAGGGAATTCATTTCAACCAGGCCACAATTACAAGAGGTCTTTAAGGGACTGCTAAACATGGA

ATTGAAAAAAATGTCACATGCTACCACAAAAAAAAAAAAA|CACTTAAGCGCATAG|CTCAAGAAAATACTGGCAAATTGAATTCAGCA
 >chr2:185973196-185973605 + E=3
GCACATTAATTCATCATAATCAACTAGACCTAATTCCAGGGATTCAAGGTTGAATCAATATATGCAAAACAATAAAGATGATTGACCAC
e-225
CTAAACAGAATTAAAATAAAAAATCATATGATCATCTCAATAGATATAGAATAAGCTTTCGATAAATCCCAACATCTCTTCATAATAAA

AACCATCAACACACTGGGCATTGAAGGAATATACCTTAAAATCATAAGAGCTATCTATGACAAACCCACAGCGCACATCACACTGAATG

GGCAAAAGGTGGAGCCGTTTCCCTTAAGAAGTGGAACTCTCATCACTCTTATTCAACATAGCACTGGAAGTCCTAGTCAGAACAGCCAG

GCAAGATGAATAAATAAAAGG
