# Supplementary material for: Chromothripsis during telomere crisis is independent of NHEJ, and consistent with a replicative origin
Source: HighWire-hosted journal article supplement (doi:10.1101/gr.240705.118), 2019-03-14
Supplement: Supplemental_file_1.zip [file contig.2.DB50_length_752_mean_cov_9.91090425532.docx]

**DB50_length_752_mean_cov_9.91090425532**

CCTTGGTGTTGTTCCAGCCTGAAAACCCAAGATTTGGGGTGTTATCTGCGACCTGACCCTCCACGAGCTGAAGGCTGCTGCGGAGGGGT
 >chr10:1492981-1493414 + E=1e-236
GGGAAAGTGGTGACTTTGGGGTGACCCCACTGGCCCTCACCATAGCTGGGCACAGCACACAGTCAGATGTGCTGTCAGGGAGCTCCTGC

GAATAGGCACAGCAGCCTTGAGAAAAGCAGAGGGAGCTGATGGTGTCTGCTGTGTGCAAGCCAGAAACACAGAGAGATGTGTGTGCCAA

CAAAACCTGGAAAATAACCATGTCCTCACAGCCTGGGGACTCTGGGAAGTCCTACAGCAAAGAAGAAGCCTGGTCTGCCCATCTTTGTG

TGACAAGTGTTTGCAGGAAATAGTTCATCAAAAAACACTTTTTCTCAGGAGACAACTAGGAATCACCTAGGA|CACAC|CTTGATGGTT
 >chr10:1498517
AATTCCATCAACCTTCAAGTCCCCAAAATGGCCCCTTGCAGGATCGTTGCTGAGGCAGAGCTGGGTTCACGAGACCCCCTGGAGAGAGG
-1498841 - E=4e-174
TGGGGGTTGCAGCCTGGCAAGAGCTAAGAGCAGAAAATTAGTGTGGGGTGTTCATAGGTTTTGGGCCGGGGACGAGAGGCATGAGAGCC

AAGAACTGGCTTGTATGGAGCAAAGTTAATGAGGAAACTTTAGGTTGGTAGGAAGAGCAGACGTCTTCCGGGCAGGAGCCTCCAGGAGC

CGTTGCTGGTGTTGAGAAGGAAGTGACTTGGTTGGTTGGTTC
