# Supplementary material for: Chromothripsis during telomere crisis is independent of NHEJ, and consistent with a replicative origin
Source: HighWire-hosted journal article supplement (doi:10.1101/gr.240705.118), 2019-03-14
Supplement: Supplemental_file_1.zip [file contig.2.DB50_length_773_mean_cov_10.6727037516.docx]

**DB50_length_773_mean_cov_10.6727037516**

TAGAAGGAGCACCTACCATGATCTGAGGGGGTGGAGTCAGGGAAGCTTCCCAGAAGAAGTGACATTTAAGCTGAGACCTGAAGGATGAG
 >chr17:28249018-28249334 + E=3e-175
TAGGAAATAGTTAGGTAGAGAGATGAGGGAAAAGTGTTCCAGGTAAAGGAAACAGCATGTGCAAAAGCCTAAAGACCAAAGGGAGCATG

GGCATGTCAGCTTAACTGTGAGCAGTGTGCAAGGCAGGGACTTGGGAAGAGACAGGGCTGAAGAGGTAAGCAAGGCTGGATCATTTAAG

GTCTCACTAGCAATTCGAATTATAGACTTTATTCTAAGAATAATACAA|A|TTTAGTGTCTTAGACCAGTCCCCTGAGACCTGTTCCTA
 >chr17:28210737-28211195 + E=1e-260
TCAATTATCTCCTGTCTCACTTTTATCTTCTATCTCTTTCCCCACTGCCATTACTTTGGTTCATTTCCTTTAGCACAGAAACATTTTCA

AGTCTACTGCATACTTTAAAATCAAGAAAAATATTTGACCTTGCATTCCTCCATCTAGATATAATCCTTTTTCTCCTTCTATTCATGAG

AACTCTTGTGAAAATGAATACTCTATTTTTACTGTTTCTTTACATACATATATATATGATGAGTGAGAGAGGTTACTATGTTGCCCAGG

CTGGTCTCGAACTCCTGGGCTCAAGCAATCCTCCCACCTTGGCTTCCACAAGTGCTGGGATTACAGGTGTGAGCCACTACACCTGGCCT

ATATTCACAATTTGTTTGATCAATTTTCTCTTCAACTTACCTCAATCAGGCTTCTCTGTCCCA
