# Supplementary material for: Chromothripsis during telomere crisis is independent of NHEJ, and consistent with a replicative origin
Source: HighWire-hosted journal article supplement (doi:10.1101/gr.240705.118), 2019-03-14
Supplement: Supplemental_file_1.zip [file contig.2.DB50_length_803_mean_cov_4.80448318804.docx]

**DB50_length_803_mean_cov_4.80448318804**

GTTACATGAACTCCTGTAATTTAATATGTTAATCTCTCTTGAGAATCAGGAAGTACATATAAAGAAGCTGCAAAGTTATTTTTCTGAAT
 >chr10:56141669-56142112 - E=1e-248
TAATAGGCTAATAAAGAGGCTAAATGAAAGAGGAAGTTTTCCATTTTTATAAAAAACGTCCCTAGAGGTAAATGGCCCTCAATACCTAC

TTCTTAAAGGATGAAGCACAAATCCCAGTATTTAAGGCTGTAAAAGATTGACCAGCCAAGAAATGTGTTGAAAATATCAATAAATATTT

AACTGTGCTAATATTTTTAACACGATTGTGATTGTTTTGATTTTTATTATTCTAAATACAAGAGAACAAGTCTTTTTCAGGAACATACA

TATAGTATTATAGTAGAAATGCCTTTTCTCTTATAGTACTGATTTTGTAGGGAGAAAAATCGAGGGTAAATGCGGTTATCCACT|TTC|
 >ch
TAAGGAGAGGGGTATGGGCACAGTTGTTCAGGCAATTCAGAGTGAACACTTAGGTTAATTTTTAAAAAATATGTATATTGCTCCTTGTA
r10:56140649-56141012 - E=2e-206
TCATGTCTGCCTAAGCTTTGCTCTCTTCTCTCTCTCTCCCCTAAATTTTGGCTTAAAGCAAGCTTGTATATGAAAATTTGAGAGGCTTT

TTTTTTTCTTTTTGGCAATACAAATGGACAATTCTAAAGGGGAAAGCAGGCAAGCAAACAAAACTCTTTCAACACACCAGCAGTAGAAA

GATTTTTTGTTGAGTTTCAATCATTGAACTCAGGAGTGAGCTGAGAGCAAGAAAACTATAGATCTTTTCCATGAAAGTTAGAATCTTTA

AATA
