# Supplementary material for: Chromothripsis during telomere crisis is independent of NHEJ, and consistent with a replicative origin
Source: HighWire-hosted journal article supplement (doi:10.1101/gr.240705.118), 2019-03-14
Supplement: Supplemental_file_1.zip [file contig.2.DB50_length_803_mean_cov_12.2789539228.docx]

**DB50_length_803_mean_cov_12.2789539228**

TGGAGCCTCCTTAGAACTTGCACTGCCGGGCCTCACCCCAGAGTTCAAGAGCCAGCAGCTCCGGGGTGCAGCCAGGAATCTGCATTTCT
 >chr10:1249511-1249905 - E=4e-219 p=6e-03
ATCAACTTCTCAGGTGATGCTCCATGGCTGGCCCAGACATCCCACTTTGAGGTCCACTGAGAAGACAGTCGCTCAGAGCAGCAAGAGAA

CGGTCAAGGGAGGCCCCACTGACCAGCATCACGACCTAACTGGTACCTGACTGTGTTGGCTCCAAATGTGCCGCTTTGCTGCAGAAGTC

TTCAACCCTGGCTCACAGGAGAATCACGTGGGCGGCACCGAGAAAGCTGATGGCCGCACTGACTCCCCAGTGACACCAAAATCCTTGGG

GGAGCCAGGCCTCTGGAGATCCTCAAAGCTCCCAGA|TG|TCCTCTCAGGAGGGTTTGTGCCTCCACTGATCTCCAGGAACTTTATTCC
 >chr10:1239128-1239539 + E=2e-235
TAAGAGACCACCGAGGAGTCGGGAGGATGGACGACCGCTCAGGTTCCCCCGAGGTTAAAGTGCAGAGGCTCACAGGAGGCTTCAGAAGA

TGTGAAATTTCCATGGCAGAGGAAAGAATCTGCATTTTTCATTTTTCAGCCTGATAATGACATGACTTTTGGCTTCTGTAAGGATTGTC

ATTATTTCAAAAGATATGGGACAAAGGGACTTTGGGGGAATGGGGTCTTTTGCTGTTCCAAATTATGTATTTTTGTGCCCTAGTACTCA

AAATGTAGTAATATGCCAGGTTTCAAACTGGATAAAAGTGTGGCTGGTTTTCATTGCTCTTCAGTCGGCATTACTCATTTGAGATTGTT

TTTC
