# Supplementary material for: Chromothripsis during telomere crisis is independent of NHEJ, and consistent with a replicative origin
Source: HighWire-hosted journal article supplement (doi:10.1101/gr.240705.118), 2019-03-14
Supplement: Supplemental_file_1.zip [file contig.2.DB50_length_814_mean_cov_10.3194103194.docx]

**DB50_length_814_mean_cov_10.3194103194**

CAATAATTTAGATAGTGAGCTTTTTACATAGATAAGTAGAAAGTTCAATATTTAAAAAGTGACCCCCTTAATTAGGTCCTGCTATAAAT
 >chr5:53280559-53280882 - E=2e-182
GAAGCTGGATTTTACATATGTGAGGGTAAATTGGCAGGATAAACAGCCATAATTGAAGGTCAAAGGAAGTGGCCTAGCTACAGGTTCAG

TCCTTTTCAGTTCTGAATCCTACAAAGATTGCAGGAATCACTTTGAAAATGAAGAAATAAGTGGGGAAGTTGGGCTGAATGTATAAATA

AGGGTTTTCTCAGTAAATTGAAGGCAGAATAATCTAACCTTAGCAAAGAA|AAAAAT|GATTTGCTGCTACTCCCAGATTAAAGAAAGT
 >chr5:53278996-53279493 - E=4e-272
AGACCAATTTACAATTACAGTAGCTATGGTCCAAAATAAAATGCAAATTGTCAAAATGCAACAGTTATAGGGAAACAGGAGTGAACCAG

AGTGCACCTTCTCTGGCATTGTTTTTAGAGAATGGAAGGCTGAAAGTGACATTGCTGAGATAGTGTGATTTAAGCAGCCTTCCCCCACA

TGCTTTGGAGACCAGAGTCCCCAAACTGAAAATTTCAGAAGTTTCTTATAAATGGGTAACATAAATTTGGAGAGCAGATCCAACATTGA

ATGCTGTTTTCCTTTAAGATGCAAGAGGATTAAGTCAATTGATGATTTTTTTAAAGAAAATTTATTTTTAAAATATACTTATGTACAGC

AAAGCACCCTGATAACTCAAAGCAGGTTTACAAGTTTTTCAGGAAAAATCTAGAAAGTGGACAAACAACACTGAATTACCGAATGATTA

GACAGTCTCTATCTT
