# Supplementary material for: Chromothripsis during telomere crisis is independent of NHEJ, and consistent with a replicative origin
Source: HighWire-hosted journal article supplement (doi:10.1101/gr.240705.118), 2019-03-14
Supplement: Supplemental_file_1.zip [file contig.2.DB50_length_842_mean_cov_5.52494061758.docx]

**DB50_length_842_mean_cov_5.52494061758**

AGAGCAAGTGTGTGTAGTGGGCCCCAGGCACTCACCATCTGCCATGCTCCCTTGTTCAAACCTCAACTATGGTCCTCAAAACCACATCA
 >chr20:15220221-15220608 - E=6e-218
CCATTGAGAGGGTAGAGATGGTAAAGAGAGCATTCAAACACAGCATAACCAGAAAATGAGGTTCTTCCACACATTTGTCACCTAGTCTA

AGTGTGTTAACCTATTTCTTTCTTTCTCCTGGCTTCTTTCTCCTTGAGTCAATGTGAGTCATGCCTCTTAATTTGGTCTATAAGCTTTT

CTGTTGTGCATCCTCCGGGATAGCTTACCTGCTAGTATACTGGGAGCAGGGAAATTTTCAGAACATGGGCTCAGAAGAGATGGAGAGAC

TGCACTAAAGTTACTCGTATGGGCTGAAATC|CATTTTCAGTCACAATTTAAATGTCGTGGTAATGGTTACTCCCAGAGGCTTCCAGTT
 >chr20:15125896-15126352 - E=1e-245
TCACATCCCAACTTGTTTCTTTTCTTAGTCTTTATTTGTACTGTACTAGAGAAGCCCTATTTAAAATTAATTGTCATTAAGAACAGTGG

CAAATGTTTGGTATTTCTTTCAAATATTTAGATGTCTTTAGAATAAAATGTTTCTGCCCAGAAAAGAAGGGTTCAGATTATTCAGACAT

CAAATACATTGCTGAGGGTGTCACTTGAATAACTGATACAAATAAAAGTGGCCTTTATTTGTATTATTGGTGTCGTATGAAAAACATGC

CTTTTTCAAAAAAAATAGAGTAATTCCTTTTTTCTCTACTCCCTGATGAACTTCAGTTTGGAAAAGCAGAAATTTATCCTTGAAACCCA

GAAAATAAATCCCAAAGACTTACACCTATGGCTATAATTTTT
