# Supplementary material for: Chromothripsis during telomere crisis is independent of NHEJ, and consistent with a replicative origin
Source: HighWire-hosted journal article supplement (doi:10.1101/gr.240705.118), 2019-03-14
Supplement: Supplemental_file_1.zip [file contig.2.DB50_length_871_mean_cov_6.71641791045.docx]

**DB50_length_871_mean_cov_6.71641791045**

TCATCTGGGTATTAAAAAAGAGATTCCTGGACAGTTTGGCTCCAGACCTTGAGCTAGTATTTGGAAAACCCTGGAAGAGCATTCCAGGC
 >chrX:49866442-49866852 + E=1e-234
TTCATCTCACCCTAAAGTCATATCAGCCTCCTGTGTGTGGGCACCATCTTAACACCTGCCACCACCTGAGAGAACTCCTTGTCCTTCTG

CTTGTTCACTATTGTATCCCAAGCATCAAGTGTAGTGCCTAGCACAGAGCAGGACCTCAGAGAATACAGTGCTTGCTGAACACTGGCTG

GTGGTGCAAAGCTGGACTGCTTAGTTCCTGTTTCCTGCCTGGAGATATGTCTCTTACCTGGTTGTATACCACCTTCTGGGCACACTACA

CTTACCCGGCCACAGGGGGTTCTGGCTCTTACATTACAAGTCACAACCTGATCA|CAGGGTTGTAGT|AAAGTTCCTTGTACCCCATCC
 >chrX:49867853-49868
GCCCTCACCTTGTCCTCAAGCATGATGCCTCTTGCTAGTTCTAGTTACAAAATAAAAACTCCCTTGTCTATAAGTGGATACCAACAGAT
302 + E=3e-255
ATGACTGTGTGTATGTGGAAATGAGGGTTGTCTTCATTAGCAATAATATACCAGAAGTGCTTTATTACACAAACATCCTTGAACTTTAC

TACAACCCTGTGATATAGGCACAATATGAAGAACCCAAGACTTGGTTGTGATTTGCTCAGTAACTCAGAGGCAGGAAGTGATGTAACAG

AAACTGGAACTCAATGTCTTTGACCCCAAGCCCAATGATCTACTACTAATTTTGTGGCTCAGTGCTCCTGTTCATCCTGAACATTTTCA

GGCCAATTTATGGGAAGAAGGTAACAGAAGCTTGCCTGGTGAAGTTGGGCAGTTGGCCTGGTGTTAAAAATT
