# Supplementary material for: Chromothripsis during telomere crisis is independent of NHEJ, and consistent with a replicative origin
Source: HighWire-hosted journal article supplement (doi:10.1101/gr.240705.118), 2019-03-14
Supplement: Supplemental_file_1.zip [file contig.2.DB50_length_923_mean_cov_8.12567713976.docx]

**DB50_length_923_mean_cov_8.12567713976**

TATTAACACACAGTCTATTTATGCAGAAAGGCTCTTCTTTGATGTCAATGTAGGAACTTGGTAGCCTGGTCACCAGAGAGGGGTGTTCT
 >chr8:64600473-64600950 - E=5e-275
GCTTCTTTAGAAAGAATCCGTGGTTTGTCAGAAATTTCACTTGGGAAAATCAGATTTTCTTGCTTGTGTATTGCTCGATAGAAGCGATC

TTTTCTCAAACAATATGCTTTTTAATTATTTGAGGCTTAGGGACATAAACAGGCAGTTTGATGTTTGTTTGTTTGTTTGTTTGTTTGTT

TTAAAGAAATCTTAGCCCTATCTCCAAAGTAATGAGTAAAATTAGTCAGTCAGTGAATTGAGGAAGCTGCCACTTGGGACTCCAGGGGT

TGACATTTGACAGGTTTCTTAAGAGCTAGAAGAAGAAAGAAAGAAACAGGTAAACAAATGAGACTGAATGGGAGTGGAGGTGACAGGAA

AGAAGGCATGCACAGCAAAGTAATCCTCAAAA|TCCTGACCCTAAGTTCACTGGCACCGCTTTAATCACTCAGTCTTCTTGGTCTATCC
 >chr8:64595521-64595967 - E=2e-256
CCTGCAGACAAGCTCGTTTCAGCTTCCTCCTGACCCTGGATCACCAGCTTTCTTTGCCAACTTTGTTTTCTTCCCTTTCAATTCATCTA

GTCCAGTGACCCAGCAGTCTCCTACAGCTGCCCAAGTACCTTTCTTAGGGTAAAGGCTCAGGGACTATTTGTTGAATAAATTAATAATT

AACTATCTTATAATGATTTTAACACCCATTAGCTTAAAGCAATTATCATCTTTTGGATATTTTCTATATTTTAATGAATGTAATTTTAA

ACTCTTCTTGATAAGGGAAAATTTATTAGTTTAAGAGCTTTCAAACATTACATTTGTACTGTTTAATTCTGAGTCAAAGAACGTGCTTA

GAAGTCAGGCTTAAAAGGCTGTCTGGGGTAAACA
