# Supplementary material for: Chromothripsis during telomere crisis is independent of NHEJ, and consistent with a replicative origin
Source: HighWire-hosted journal article supplement (doi:10.1101/gr.240705.118), 2019-03-14
Supplement: Supplemental_file_1.zip [file contig.2.DB51_length_268_mean_cov_6.15671641791.docx]

**DB51_length_268_mean_cov_6.15671641791**

GACAGCAATTTCAGTGAGTTTTAGAGCAGACCTTTCCCTGGTTGCGTCTCAATGTGGGAATGCAGCCTGGATGCCACGTTGATCGCAGC
 >chr18:68956044-68956238 + E=9e-103
CTTGTGGTATCTGGAGCCCACGGTCAAGTGATGCAGCACTGGGAGGGATTCCTTTCCTACGGAAACAGTGAGCCAGTCAGTGTGTATTG

TTAGAAGCTGCTAAT|A|ACACAAGGTCAGGCTCCTGGCACCAGAGGGAGAGCCAGGCAGGCATAAACTGCACACGGGTCAGACAAGAG
 >chr18:68906560-68906635 + E=7e-34
CGA
