# Supplementary material for: Chromothripsis during telomere crisis is independent of NHEJ, and consistent with a replicative origin
Source: HighWire-hosted journal article supplement (doi:10.1101/gr.240705.118), 2019-03-14
Supplement: Supplemental_file_1.zip [file contig.2.DB51_length_277_mean_cov_7.03971119134.docx]

**DB51_length_277_mean_cov_7.03971119134**

AAGAGTGACTTTCCTAGAACTGAGGTGTAGCTTAATCTATATGTACAAATCTAATAAAGTATGTCACTTGAGACTTAAACATAGCCAAT
 >chr6:70380161-70380331 + E=3e-91
ATATGTGTTGAGAACTGTCCAAGGCAGCACAACTCAATCCGGGCAACTTGGGCAATCTGGTCCCCTTAGAGTGGTCTCT|GC|ACTCAT
 >chr6:6
GCCATTCTACAAGTAGATTTTTATAGCATTTCTTCATACATATAAATATTACATAAAAGACCATTACATTTATTAAAATGCCAAGTACT
6658365-66658474 + E=3e-51
TTTATTTGTACT
