# Supplementary material for: Chromothripsis during telomere crisis is independent of NHEJ, and consistent with a replicative origin
Source: HighWire-hosted journal article supplement (doi:10.1101/gr.240705.118), 2019-03-14
Supplement: Supplemental_file_1.zip [file contig.2.DB51_length_282_mean_cov_6.91489361702.docx]

**DB51_length_282_mean_cov_6.91489361702**

TCACCCACGTGCGTGGTTTTACCCCGTCTCCATGACCCAGCCACGGGTCTTATATTGGGGGCTTCTAGGACCAACTAGGCCAATAGAAG
 >chr6:1683102-1683264 - E=2e-86 p=1e-02
TGCTTTCTTTAATTGAATTAAAATGTCAGTAAATTTCACCCAAATATCCAGATTTCCCTTTCT|AAAAAAATGA|AAGGCCATCAGCAC
 >chr6:1682671-1682801 -
TGGGGCAGATTCCTCACTGACTGGCCTGCCCGCCTGCCTGGCCTAGTGGGCACACAGAGTCCCCGGTCCTCCCAGTGGCAATGGCACCA
 E=5e-67
GCATGGCCAGAGGGCAC
