# Supplementary material for: Chromothripsis during telomere crisis is independent of NHEJ, and consistent with a replicative origin
Source: HighWire-hosted journal article supplement (doi:10.1101/gr.240705.118), 2019-03-14
Supplement: Supplemental_file_1.zip [file contig.2.DB51_length_284_mean_cov_4.78521126761.docx]

**DB51_length_284_mean_cov_4.78521126761**

AACAGAAAAAGGAACCACACATTTGTTTGTTTAATGAATGCCAAATGATAGACCTAGGTCTAACATAAAGCAGAGGAAATTATCTTTTC
 >chr18:66752215-66752372 - E=3e-83
TTGAGAGAGTATTGGTAATTGGCAATATCTGCCATGACTTGTTAGCATGTCCAACCTTCAATTCAGT|T|GATTGAGATGAAAATTATA
 >chr18:68495167-684
AGTAAGTGATTTTAAAAAATATGTTGTTAACTCAGTCCTCATCCTGTGCTTTTAAATTTCTTATCCAGGAAAATCACTTTTGACAGTGT
95295 - E=8e-66
GTCCTGACAAGGCATTTGC
