# Supplementary material for: Chromothripsis during telomere crisis is independent of NHEJ, and consistent with a replicative origin
Source: HighWire-hosted journal article supplement (doi:10.1101/gr.240705.118), 2019-03-14
Supplement: Supplemental_file_1.zip [file contig.2.DB51_length_285_mean_cov_5.47368421053.docx]

**DB51_length_285_mean_cov_5.47368421053**

GCAGTGGTTACCGTAACTATTTGTTCTCATATTTCTCCATCGTGGAAGCGAACAGCAGTATCCCAGTGATTTCCGTTTCTCTTACTCTG
 >chr20:2694740-2695004 + E=4e-136 p=0e+00
AGTGAGGTTGAGCCCACCAGGGCTATTTAAAGGCTATTTGTGTTTCCTTTACTGTGAACTGTCTGTTCATATCCTGTGCTTATTTTTCT

TTTCTCCTTCCTTCCTTCCTTCTTTCTTTCCTTCCTTCCTTCTTTCCTTCTCTCTTTCTCTCTCTCTTTCTTTCTTTTTTTT|CTTT|T
 >chr
TTTTTTTTTTTTTTTTTGTG16:69163329-69163354
