# Supplementary material for: Chromothripsis during telomere crisis is independent of NHEJ, and consistent with a replicative origin
Source: HighWire-hosted journal article supplement (doi:10.1101/gr.240705.118), 2019-03-14
Supplement: Supplemental_file_1.zip [file contig.2.DB51_length_287_mean_cov_3.65853658537.docx]

**DB51_length_287_mean_cov_3.65853658537**

CCTCACCTGCACTTTGTGCTCTAGCTTAGTACAACTCTTTGGCAGTTCTTAGAATCAGCCATGTTGGTTTTCATCCTTTTGTCTCCTCA
 >chr6:79766016-79766107 - E=2e-43 p=3e-02
CA|GTGTTT|CTTTGGAAGTAAATGCTGCTATGCCAAGTACACACTCACATCTCTCTTCCACAATAAAAGAATCACAAGCTAGTAATAA
 >chr6:79765204-79765394 + E=3e-103
CAACAGATCAGTGGGATCTTTTGTCTTTGCTTTTGAAAACAGTATTAAAGGAGGTTCTAGAGCACTGGAAGGCAGGTGAACCACTTTGG

GTCTCTTGCTGAGACTGAGTTC
