# Supplementary material for: Chromothripsis during telomere crisis is independent of NHEJ, and consistent with a replicative origin
Source: HighWire-hosted journal article supplement (doi:10.1101/gr.240705.118), 2019-03-14
Supplement: Supplemental_file_1.zip [file contig.2.DB51_length_311_mean_cov_3.75241157556.docx]

**DB51_length_311_mean_cov_3.75241157556**

AGGATGGCACAGATGTTTCAAACTACTTAACAG|ATAATTT|TAATTAAGAAATTATCTGTTAAGTAGTTTGAAACATCTGTGCCATCC
 >chr4:70114438-70114478 - E=1e-12 >chr4:70114423-70114701 + E=1e-156
TTTCTTTTCAAATGTATGAATTTTTTTATAAGTTCCCACAAATCAAAATTATGGAAAAAAAAGACACAATCCCAAAGAAAATTTATCAT

AGAACAATGGAACATAGGTAATTCTCTAGCTCATTCGTCTTCAATAAAACAAATAAATATAAGAAGACAAAGGTCAGGAAGGAAATAGA

GAAGAAAAGATAACCGATTATCCAAAACACACACAAAATTGAAAGC
