# Supplementary material for: Chromothripsis during telomere crisis is independent of NHEJ, and consistent with a replicative origin
Source: HighWire-hosted journal article supplement (doi:10.1101/gr.240705.118), 2019-03-14
Supplement: Supplemental_file_1.zip [file contig.2.DB51_length_312_mean_cov_4.80769230769.docx]

**DB51_length_312_mean_cov_4.80769230769**

ATTGATTATCCTCAGGAGCCACCCCCAACGCCCCTGTTTGCTTCTAGATCTATAACTAGACTAAAGTCATGGCGGGTCCCTGGAGGTAA
 >chr4:133277198-133277449 - E=4e-137 p=5e-03
GGTTGAGAGTGTGACCCATGAGGAGGTACATTACACTTGAAAAGAACACTTGAAAAGAACTGCTCGAGTTATCTAATTTATATAAACAG

AAATCTGGAGAACAGGCATGGAAATGGATATTAAGGGTATAGGATAATGGTGGAAGGCACAGAG|TTTGATCAG|CAGCTTGGTTACTG
 >chr12:95288007-952880
GAATTTAATAAACTAATTGGAGAATGGTGTAAGTGCAAGATAACAGC77 + E=1e-27
