# Supplementary material for: Chromothripsis during telomere crisis is independent of NHEJ, and consistent with a replicative origin
Source: HighWire-hosted journal article supplement (doi:10.1101/gr.240705.118), 2019-03-14
Supplement: Supplemental_file_1.zip [file contig.2.DB51_length_337_mean_cov_7.10089020772.docx]

**DB51_length_337_mean_cov_7.10089020772**

CTGGTCTTCCCATTCCACACAGCAGCTGTTCCCACCACACCCTCCTCAGATCCCCACCCTTATCCTCATTCC|TTGAGCAAATTA|CTC
 >chr4:30804330-30804402 - E=6e-32 p=3e-02 >c
CTTCCATGGCTTATCAAGATTAGCATTCTGCCTTCTGTTTTTACTCTCTATATGCATATATTCACTGGGTATTTCATTTACTTGCATGG
hr4:30802780-30803033 - E=4e-141
AGTCACCTATCACTAAGTGTAAATAAATTGTTTAATTCTTTCCTCCTAATGTTTATCTCCCACATTTCCAATTCCACTTTCTTATTAAA

ATGTTCAAAACTAAAATCTGAAGCAAATATCTTATCCATTACTATTTTCTCTTTTCCCCAACATCTAATCTT
