# Supplementary material for: Chromothripsis during telomere crisis is independent of NHEJ, and consistent with a replicative origin
Source: HighWire-hosted journal article supplement (doi:10.1101/gr.240705.118), 2019-03-14
Supplement: Supplemental_file_1.zip [file contig.2.DB51_length_355_mean_cov_7.53802816901.docx]

**DB51_length_355_mean_cov_7.53802816901**

TGAGGTTTTCACCAATTCCAAACATGAGTAGGAACCAAAAGTAATTAGGCTAAGAACACAGCCAAAGACATGGCACAGGAAAAGCCTAC
 >chr1:33511096-33511220 - E=3e-63
CTGGACAGCCACCACTGGCCACGGTCCA|CCCACTG|CTGTCAAAGCGTGTCACTCGGCCTTCAAGCCCTTCCCAGATCTAGCCCTGCC
 >chr1:33583941-33584179 - E=5e-132
TCCCTCTGCAGTCACAGCCACTCTCCATGCGAGCCTTGAATGCACCACACTTGCTCTCCGTTCCTTTCTTCTGGGAAGTCCTACCACCC

ACTCCTGTAGTTGACTCCCACTTCCTCAGGGAGGCCTGGGCCTCAGGGAGGGCTCTGCACTTCCACCAGGCACAGTATTATCACAAGGG

C
