# Supplementary material for: Chromothripsis during telomere crisis is independent of NHEJ, and consistent with a replicative origin
Source: HighWire-hosted journal article supplement (doi:10.1101/gr.240705.118), 2019-03-14
Supplement: Supplemental_file_1.zip [file contig.2.DB51_length_361_mean_cov_2.90858725762.docx]

**DB51_length_361_mean_cov_2.90858725762**

TTTGCACTCCCAAATGGGGGACTTGGTGTGCTTGTTTCAGAGAGAGTGTAGGAGGAGGAAAAGAAGGGAAATGACTCCACATCTCAGCG
 >chr10:30383529-30383861 - E=4e-189
AGATCAGGGAGACAGATATTCGGGAGGAGGTGGGAGAATGAAAATGACTGGGAACAGGTGGGCTAAATCGGTGAGGTGTGTGGGGAAGA

AGCTAAGTTAGGAGTGGGCGGCTGGTTTTTCCAAAGGCAAAGATGGTGTCTTAGTTGGGAGCAGGAAGAGAACTGATTTCTTTCCATAA

GGCTGCCATGCAGTCTCCTCCAGACTGCATAAGGGAAAATGCAGGTAGAAGTAGCACTCGTCTGC|A|TGGCAAACTCATTGGTATGGT
 >chr18:67127879-6712
AAATTTA7907 +
