# Supplementary material for: Chromothripsis during telomere crisis is independent of NHEJ, and consistent with a replicative origin
Source: HighWire-hosted journal article supplement (doi:10.1101/gr.240705.118), 2019-03-14
Supplement: Supplemental_file_1.zip [file contig.2.DB51_length_363_mean_cov_3.97796143251.docx]

**DB51_length_363_mean_cov_3.97796143251**

C|TTATTTATCCCTTTGCCAATATTATATTGCCTTAATTCATGGAGCTTTTTATTATTATATTCAGTAAGACAAATTCCTATATCTGTT
 >chr6:79336285-79336461 + E=1e-91
TCTTCTTCAGGAAAGTTTTGGTTATTCTTGAGCCTTTATGTTTTCATTTAAATTTTAAAACCAACTTGTCAAGTTCCTTAAAAAAAAAA

|AG|TTCACTTCTAGGAAAGGCATTGGGAACCCTTGATGTTGCCCCTGCCGCGAAGCTCTCTTTCACACTCCCGGCCGAAAGCCCTCAG
 >chr6:14964768-14964952 - E=2e-99
AAGATGCGAGGAGGAGGATTTTGGCATGGACAGTGATGCCATAGGGCAGTTGCTGTGGTAACAGGAGTCTCTCATGCTGTTGGAGTAGT

GTCTGGGAGT
