# Supplementary material for: Chromothripsis during telomere crisis is independent of NHEJ, and consistent with a replicative origin
Source: HighWire-hosted journal article supplement (doi:10.1101/gr.240705.118), 2019-03-14
Supplement: Supplemental_file_1.zip [file contig.2.DB51_length_382_mean_cov_4.31937172775.docx]

**DB51_length_382_mean_cov_4.31937172775**

TGAGAATCTAATGCCTGAACATCTGTCTCACCCCCAGATGGGACTGGCTAGTTGTAGGAAAACAAACTCAGGGCTCCCACTGATTCTAC
 >chr18:52573188-52573405 + E=3e-113
ATTATAGTGAGTTTATAATTATTTTATTATACATTACAATGTAATAAAAATAGAAATAAATGTAATGCACTTGAATCACACCGAAACCA

TCCTCTCCACCCTGGTCCATGGAAAAACTGTCTT|CCATG|CCAGGCTAATTTCCCAGGACAATGTGGAGTAATCCAAGTGGATGACTC
 >chr6:65413478-65413648 + E=7e-85
TTTGGTTCATTACAACATTCATGAAGAGGGAATTTTCAGTGTCAAGGTTCATTGAACATTGATGCATTTAAATATATAATCTCACCACG

CTAACTGTGGTAATTGTTATTACAAGAA
