# Supplementary material for: Chromothripsis during telomere crisis is independent of NHEJ, and consistent with a replicative origin
Source: HighWire-hosted journal article supplement (doi:10.1101/gr.240705.118), 2019-03-14
Supplement: Supplemental_file_1.zip [file contig.2.DB51_length_394_mean_cov_7.99492385787.docx]

**DB51_length_394_mean_cov_7.99492385787**

TTTTTCTGGAGCCAGAATGCAACTCCAACTAAAGCCCTCTGCTCCATTTCTCTTAAGTGCAGACCCATCCTTAATCCAGTGGGCACAAT
 >chr4:133278353-133278615 - E=2e-146
CTAATCAGCTGCCAGCAAATATAAAGCAGGCAGAAAAACATGAAAAGGTGACAGTGGCCTAGCCTCCCAGCCTACATCTTTCTCCCATG

CTGGATGTTTCCTGCCCTCAAACATCAGACTCCAAGTTCTTCAGTTTTGAGACTTGGACTGACTCTCCTTGCTCCTAGGGCT|TG|ACC
 >chr
CATGCTGCCATGAGCCTTTCCACCTTTGTCAGAGGAGATAAATACCTCATTGCCTGAGGCTACAATGATGGTCTCCCCTGAGGCAGGGG
4:133277432-133277566 - E=3e-69
AGACTTTTGACAGGCAAAGTAATATTGATTATCCTCAGGA
