# Supplementary material for: Chromothripsis during telomere crisis is independent of NHEJ, and consistent with a replicative origin
Source: HighWire-hosted journal article supplement (doi:10.1101/gr.240705.118), 2019-03-14
Supplement: Supplemental_file_1.zip [file contig.2.DB51_length_396_mean_cov_3.4797979798.docx]

**DB51_length_396_mean_cov_3.4797979798**

ACCAGCAGTGAGATTCTTCACAGAAAGAGATAGATCCTCTACTCAAGTTGGGTACATTTTACAGCCATCAGTGAGTTAGAAATAGGCTG
 >chr20:19615498-19615757 - E=1e-144 p=4e-02
TGTCTATGACATAGCATGCACAAATATGAAAAATGTAGTCAAATATCTTTTTCCTAAACATACGCACTGTGAAGATAATTAAATTTCTT

CTATCTTGGTTGGATGGTGTTTTATTTGTTGATTGGTTTTTAAATAAAATTTTTGCGGTATCATTTATAAGCAGTG|AAATT|CCTTCT
 >chr20:196
AGAGTGTGGAAAAAATTCTTTGGTTTGATGCCTTCTTACCTGTGCTCCAGTTTGTCACCTCTATGCAAAAAAAAAATGATTTGGCTAAG
30741-19630854 + E=2e-47
GGTAGGCCCTGAA|GAGGCGGCTGTAAGTTTAATACAATTCAG
