# Supplementary material for: Chromothripsis during telomere crisis is independent of NHEJ, and consistent with a replicative origin
Source: HighWire-hosted journal article supplement (doi:10.1101/gr.240705.118), 2019-03-14
Supplement: Supplemental_file_1.zip [file contig.2.DB51_length_426_mean_cov_7.98591549296.docx]

**DB51_length_426_mean_cov_7.98591549296**

TCTATTAGTTATGGATATTTTACATTTTACATGACTGACTATATTAAGGGATAGGAAAAAAACTTCCTTTGATTAGAGAGAATTCTTTG
 >chr6:63634851-63635059 + E=1e-107 p=3e-02
CATTATGATGACATATTACAGTAAGGGGCTTACTAAAACTCCTCAGCATCTTTGAAAGCCATGCCAGTAGTGGAAAAGGCTAAATTATA

TATGTATCAGGCTCTTTATACTTAGCTTAG|AAAGT|AGTAGAAAGTAGGGGGTGAATATATTGCAGGAAAAGACAATATTATGGTTTA
 >chr6:63635796-63636009 + E=1e-116
TTAGTTATCTTTTGCTGAATAAAAAAGTACTACCAACTCAGTGGCTTATAACAACATGCATTAATTATCTCATAACTTCCATGTGTCTG

GGTCTGGGAATGCCTAGCTGAGCCCTGTAGTCAGTGTCTCACAAGCTGTATTCAAGGTGCTGGCTTTGTCTA
