# Supplementary material for: Chromothripsis during telomere crisis is independent of NHEJ, and consistent with a replicative origin
Source: HighWire-hosted journal article supplement (doi:10.1101/gr.240705.118), 2019-03-14
Supplement: Supplemental_file_1.zip [file contig.2.DB51_length_448_mean_cov_5.90625.docx]

**DB51_length_448_mean_cov_5.90625**

AT|AAACCACCACCATTTGATGGGGAGGATATGCTAGATGATACCTGCTTGCCACCTGTCTTATTTTGGATTCCTCTAAAAGCAGACCC
 >chr20:19494859-19495078 - E=3e-120
TCCGACAAGGATGTGGAGCTATGTGGTTTACTTGGGAGATGACTCCAGGATGCACTGTGCATGAGGGAGGCAGTGCAGCCAGGAAGGGG

AGAAGAGACAAAGACAGTGCTGCTAAGGAGTGAGTGGATGACCT|TACTA|CAAGCCTTATCCAAATTGGTTAAATGTTATCAACTTTG
 >chr6:133568482-133568704 + E=5e-113
TATTTTCTTTGTTTTTGTTTTTTGTTGTTTTAATGCTGGTTTTGAATCTCAAATCTGCACATTTATGTTGAACCAACTAATAAGGCTTG

AAGAGTTAAAGAGTGCATGATGGACTTCTGGAGGCAGGTTTAAATTATAATGGAGCTGCCCATATTTTGGCCCTACATTCAATTTATCT

GGTTAT
