# Supplementary material for: Chromothripsis during telomere crisis is independent of NHEJ, and consistent with a replicative origin
Source: HighWire-hosted journal article supplement (doi:10.1101/gr.240705.118), 2019-03-14
Supplement: Supplemental_file_1.zip [file contig.2.DB51_length_483_mean_cov_4.11801242236.docx]

**DB51_length_483_mean_cov_4.11801242236**

TGACTTTAGAAAATAAATATTTTCTTCCTTACTGTACTGAT|TTG|TTGATCTGTCTAATATTTACAGTGGGGAATTGAAGTCTCCCAT
 >chr6:12297391-12297435 + E=7e-12 >chr6:80058630-80059073 - E=1e-247
TATTATTGTGTGGGAGTCTAAGTCTTTTTGTAGGTCTCTAAGGACTTGCTTTATGAACCTGGGTGCTCCTGTATTGGGTGCATATATAT

TTAGGATAGGTAGCTCTTCTTGTTGAATTGATCCCTTTACCATTACGTAGTGGCCTTCTTAGTCTCTTTGGATCTTTGTTGGTTTAAAG

TCTGTTTTATCAGAGACTAGAGTTGCAACCCCTGCTTTTTTTTTTGTTTTCTGTTTGCTTGGTATATCTTCCTCCATCCCTTTATCTTG

AGCCTATGTGTGTCTCTTCACATGAGATGGGTTTCCTGAATACAGCACACTGATGGGTCTTGACTCTTTATCCAATTTGCCAGTCTATG

TCTTTTAATTGGGGTATTTAGCCCATTTACATTTAAGTTA
