# Supplementary material for: Chromothripsis during telomere crisis is independent of NHEJ, and consistent with a replicative origin
Source: HighWire-hosted journal article supplement (doi:10.1101/gr.240705.118), 2019-03-14
Supplement: Supplemental_file_1.zip [file contig.2.DB51_length_484_mean_cov_3.85123966942.docx]

**DB51_length_484_mean_cov_3.85123966942**

TAAACTACAGTGACATTCTGTAGGCTTCGAATTTCTGACACAATCACAACTAATATAATTGGTAGTACAATATGTTGGCTTTTCTATAT
 >chr20:20177573-20177832 + E=2e-141
TGACAAAATAGAGACTGAAAACTGTGCAGAAATGCTCTAAGAGCATGAAGATCTAATAATTTCTTATGATACGTGAGTACAATGCCAAC

ATGATCCTATTCTGTTCCTTCAAGCCAAGAACATTTCAGTGATGAATCAATAGAATAAATTAATTCTATTTTAGAAGA|CTG|AATTAC
 >chr6:74
TTCCCTTGGCTTTAGACAAGGGATGCACTGACTTTCCTCAATCACAGGACAGAATAAACAGTCTCAAAAACACAGTTTTCTCCCTTCCT
769802-74770032 + E=8e-121
GATGCCTAACTGTCAAGCTGACCTCCATTACCTCTTAGTCTTCTTATTTTTTTGGTGGGTATGTGTGGGAAGTAGGGATTCATTGTAAA

GCAAGACTTCTGGATTATTAGGTTGGTACACAAGTAATTGT
