# Supplementary material for: Chromothripsis during telomere crisis is independent of NHEJ, and consistent with a replicative origin
Source: HighWire-hosted journal article supplement (doi:10.1101/gr.240705.118), 2019-03-14
Supplement: Supplemental_file_1.zip [file contig.2.DB51_length_498_mean_cov_6.89759036145.docx]

**DB51_length_498_mean_cov_6.89759036145**

TGTTATGTGTGAATTTGATCCTGCCATTATGATTTTAGCTGGTTATTTTGCTCGTTAGTTTATGCAGTTTCTTCCTCACCTTGATGGTC
 >chr6:80058283-80058626 - E=6e-195
TTTACAATTTGGCATGTTTTTGCAGTGGCTGGTACCAGTTGTTCCTTTCCATGTTTAGTGCTTCCTTCAGGAGCTCTTGTAAGGCAGGC

CCAGTGGTGACAAAATCCCTCAGCATTTTCTTGTCTGTAAAGGATTTTATTTCTCCTTCACTTATGAAGCTTAGTTTGGCTGGGTATGA

AATTCTAGGTTGAAAATTCTTCTGTTTAAGAATGTTAAATATTGGCCCCCACTCTCTTCTGGCTTGTAGAGT|TTCT|TTTTGCTCAAA
 >chr6:12268997
ATTGCTTTGGCTATTTGGAGCCTTTTCTGGTTTCATATGAATTTTAGGATCAACTTTTTCTATTCCTGTGAAATATAATTTTGTGAAAA
-12269156 + E=4e-84
ATATCATTGGTATTTTGATAGGGATTGTATTGAATCTATAGATGACTTTGAGTAG
