# Supplementary material for: Chromothripsis during telomere crisis is independent of NHEJ, and consistent with a replicative origin
Source: HighWire-hosted journal article supplement (doi:10.1101/gr.240705.118), 2019-03-14
Supplement: Supplemental_file_1.zip [file contig.2.DB51_length_521_mean_cov_6.26103646833.docx]

**DB51_length_521_mean_cov_6.26103646833**

ACAAGTGACATCTGAAAAGGTGATTTCAAATGAAGCATTTCTCAATCCAAATCAGATAGGAAATTAAGGTATAATTATTTGATAAGATA
 >chr4:177650277-177650430 + E=2e-80
AAGAATGTTTAAGTTATTAAACAGATATAGTATGTAAAATATAGCCATCTGTTTTAAAAATTTT|AAAGACAATAAAGTACGAAATTAT
 >chr4:177653256-177653
TTGCAATATACATAATGGATAAAAATGGACTAATATTCTTAAAACACTGCATGAATACTGGTGCTTCAATAGAAAGATGGACAAAGAAG
624 + E=6e-204
GTGAACTGAATATTAACGAAGAAGAAATATAAATAATACATATTGTATGATGGCAAAAGTGAAAGAAACTATAATTCTTTTCAATCCTT

TTCAATCTATATCTAAGAGACCCCCAGACTAAAGTTCAAGTTCATTCTTTTAACAAATTAGCACCTGAAGTTTTCTTGCATTTGTAGCA

ATTAGCACCTAATTTGTTAAAAGAATGAACTTGCATTTTAATCTGGGGGTCTCCTAGGTACAGATTGGTTTGAGGAA
