# Supplementary material for: Chromothripsis during telomere crisis is independent of NHEJ, and consistent with a replicative origin
Source: HighWire-hosted journal article supplement (doi:10.1101/gr.240705.118), 2019-03-14
Supplement: Supplemental_file_1.zip [file contig.2.DB51_length_534_mean_cov_2.50374531835.docx]

**DB51_length_534_mean_cov_2.50374531835**

TTCTGCTATTTAATTTTAATATCTGAAAGAATTATTTCCCTGGGTGCACTTCCCCAGGCCCAGATTGCTGTTGTTCAGAGCCAAAG|AA
 >chr20:19502337-19502426 + E=7e-39 p=1e-02 >
T|CTGAAGGCTGTCTGGTCCCAAGCATTTGGAATAAGGGATACTCAACCTGTATATGCTTTTGCGAACTAAGTTTAGCATTTAAATGTA
chr20:7971685-7972069 - E=9e-209
TTTAAAGCATTTTTATTGGATTTGTTGAATCTCTGCTGCTCACTAATAATATAGGATGTAACTTCCCTTTCCTAAATGTTACTGTCGTT

TTGAGAGGATGTAGGCATATGGCAGATTTTAGCTAAAATAAGATGTGCTACATCCTTGGGAGGACAATCTGTGTGATGGATGCTACCTT

CCCTTTTTATTAGAATGACGTGACAGAAAACTTAAGGCTTTATTTAAAATATCTGATGATGAGAATTAAAAGCCATGAACATTTAGACT

AGAGAAGAACAAAGGGTATTTTAAAA|TATAAAAACATACTTATGTGATATAAATAGCCTGCTTATTATATATGTTTTATTATTTTAAA

ATA
