# Supplementary material for: Chromothripsis during telomere crisis is independent of NHEJ, and consistent with a replicative origin
Source: HighWire-hosted journal article supplement (doi:10.1101/gr.240705.118), 2019-03-14
Supplement: Supplemental_file_1.zip [file contig.2.DB51_length_538_mean_cov_4.61710037175.docx]

**DB51_length_538_mean_cov_4.61710037175**

TTTGTATACTAAAGAGTTTAGATTTATTCTGGATAAATGGAGAGCTGTGGAAGGATTTTAAAGGGAAGAGTGATTTAAAAAGACAATAA
 >chr3:180299102-180299278 - E=3e-91
CGTGGCTAATAGAACATTTTAAATTACATATGTGTTCACGTTATATTTCTATTGGCCAGTTTCTATTTGGATATCCTGTCATCAGTC|C

TTATATAGTCATGGTCAGAGATGAAATTCTTTATTTGGAGGTAAAGAGTTAAATGTAGACATATAGGCAGGAAAAAAAAAACCAGCATG
 >chr3:180297656-180298018 - E=3e-200
AAAGCACACTATGTACATTAGAAGAGTTGAAGAGAAATGAGCCTTATCATGCAAACCACATTGACTTTGAAACATATTGCAGTCATATT

GTTCTGAAATTCTTATTGTAGGATACATATTGAGATTGTCAGAAAGGCTGTGTGAACACTGGGGCTTTTGCAGCACTGACACTATTTTT

ACCTATTTTGTTGCTTTGGCTTTTGAGCTCTCTTCCCTCCTTTCTTCCTTCCTTCCTTCCTTCCTTTCTTTCTTTCTCTCTCTTTCTGT

CTTTC
