# Supplementary material for: Chromothripsis during telomere crisis is independent of NHEJ, and consistent with a replicative origin
Source: HighWire-hosted journal article supplement (doi:10.1101/gr.240705.118), 2019-03-14
Supplement: Supplemental_file_1.zip [file contig.2.DB51_length_544_mean_cov_4.00183823529.docx]

**DB51_length_544_mean_cov_4.00183823529**

GTTCCATTACCTCTTTGACCTTCCCTTTCCTCATTCCACTCCTGCATACTGGCCTCCCTGTTCTTCCTGGAAAATACCAGGCACCCTCC
 >chr6:135246738-135247159 - E=7e-233
TCCTTCTTGGCCCTTGCTCTTGTTGCTCACGCTGCCTGGAATGCTCTGCCTTCAGATGCACGCATGGCTCTCTCCTTCCCCTTCGGAGA

GTAGATGTCACCTGAATGAGGGCTTTCCTGCCTACCCTATATACAGTGGTACCTTTTAAAACTTTGACTTCTTTGGAGCTTTATTTTTC

TCCACGGTTCTTACTGTCATCTGACATGCAATATATGTATCCTATCCCTTTACTGACTATCTTCCCTGGACTAGAATGTCAGCTTCTTG

GTCAGTTTTATTCATTGCTGTATCTTTAGACTCTAGAAAGCTCCTGGAACATAGTAGGTGC|ATAG|CCACAGAGAGAATCCTGTTTTA
 >chr20:19432539-19432666
TAACATGTGGACAGACTGAAGCAAGTCAAGGAAAGCAAACGGGATGGGGAGGGAGGCTCTTGGTAAACATTTCCTTCTTTCACTTTATT
- E=9e-65
GGGGCTGAAAGC
