# Supplementary material for: Chromothripsis during telomere crisis is independent of NHEJ, and consistent with a replicative origin
Source: HighWire-hosted journal article supplement (doi:10.1101/gr.240705.118), 2019-03-14
Supplement: Supplemental_file_1.zip [file contig.2.DB51_length_553_mean_cov_8.47920433996.docx]

**DB51_length_553_mean_cov_8.47920433996**

ACTGGCCTTCATGTGCATAAATGGCCCTAAGGTGTACAGCTGACCTGATGCATATAGCTGACCCCATGCATATAGTTGACCCGATGCAT
 >chr6:164348841-164349050 - E=5e-90 p=0e+00
ATAGCTGACCCTGATGCATATAGCTGACCCTGATGCATATAGCTGACCCTAATGCATATAGCTGACCTGATGCATATAGCTGACCTGAT

GCATATAGCCGACCCTGATGCATATAGCTGA|CGCTGATGCATATAGCTGAGCCTAT|GCTAACACAGTGAAATCCCGTCTCCACTAAA
 >chr6:158067452-158067754 + E=
AATACAAAAAAATGAGCCGGGTGTGGTGGCAGGCGCTTGTAATCCCAGCTATTCAGGAGGCTGAGACCAGAGAATCGCTTGAACCCAGG
3e-144
AGGCAGAGGTTGCAGTGAGCTGAGATAGCGCCACTGCACTCCAGCCTGGGTGACAGAGCGACACTCCATCTCAAAAAAAAAAAAGAGGA

AACAAAATGTTAGAGAATGTTTCCAGAGCAGCGTGGTCCTCTTTGCTCTTTATAATTAAATTTTTATAGAAGTGTCTATCTACACTT|T

AAATAAAATTCTGAAGATAGGT
