# Supplementary material for: Chromothripsis during telomere crisis is independent of NHEJ, and consistent with a replicative origin
Source: HighWire-hosted journal article supplement (doi:10.1101/gr.240705.118), 2019-03-14
Supplement: Supplemental_file_1.zip [file contig.2.DB51_length_556_mean_cov_6.11870503597.docx]

**DB51_length_556_mean_cov_6.11870503597**

TAACCAGAACAATTAGCTCCTATTATTACAACACATTAATATATCTTCATCTTCCAAAAGTTCTGCATAATTACATTTCTACAAAATTG
 >chr3:164342108-164342453 - E=5e-193
CCTATACAATTTGAACTTCATTCCTAAATTGATTTTTTTGGGGGAATGGGTGTTATTTTTTCTAAAGCAATGTTACATATTTTTTGTTT

TATCTTTAATTTTATTGCCTTCTGTTCAGAGATTATTGGTGATAACTATGCAGATTATTATAAAGTTTCACAATTTAATATAATTTTGA

AAGGATATTGCATTGACATTATGAATTTTTAGCATTATCTTAAATATAATAATGAACATATATGGAAGAATGACATAT|ACTTTTACAT

GTATATGTATAAG|TAAATTGGCAGTTATCAGCATGGCTAATTCATCAGATGTTACTTGTATCATAGTGTGTAGAATGTCTTTTTTTTA
 >chr3:164340477-164340665 - E=2e-101
CACCTTCTGATTTTCATTAGTTTATCTATGTCTCTATAGATCATAATTTATTTGAATATATTTTTAAATACTTCTCATACATTCTACAT

ACATATTTTGCTATTCTTAAAGTT
