# Supplementary material for: Chromothripsis during telomere crisis is independent of NHEJ, and consistent with a replicative origin
Source: HighWire-hosted journal article supplement (doi:10.1101/gr.240705.118), 2019-03-14
Supplement: Supplemental_file_1.zip [file contig.2.DB51_length_561_mean_cov_3.69875222816.docx]

**DB51_length_561_mean_cov_3.69875222816**

TGAAACCTGCTAGAGGATATTTGCCCAAAACAAGGTAGCTAACGACACTCCATTAAAGACAATGAGCATGAACTGAGACAACTTTTCAG
 >chr6:14407722-14407968 + E=2e-133
GAAAAAAGAACTAATTAAACATTAAACTCTAGTTCCATTATTTAGAATTCTTTTCTGGACATTTTAAATTCAACATGAACATTTACAAT

GATACAATCAGATCGACTCTCCTTTCAGCTAGATATTAAATTATACTTAATGATAACCAAGATT|AGAA|TATTGGAAAGGCCATAGTG
 >chr6:14965190-1496550
CCGTCATGTGGATCTTTGTAAGGGTTAATGGCTGCTTCTTTGAATCTCAGTGTAGCAGCTGCAGATGACATCAGATTTTCTGCCACATT
9 + E=2e-180
GGCTTAAATCAACACAATGAATCCATCAAGGGGAAGGCCAAGGCACCATTTGGGGCTTACAAGGAAGGACTGGCCAGAGGTGTTCAAAC

AAATGAGATTTCCCCTGCTGTATGAGGACATCTAAAATGTGACCATTTTAGGCATTTTCATAAAACAGTTAACTGCCTTTCTCGCTGAG

AAAAAGACACACAGGACAAACATCAAGAG
