# Supplementary material for: Chromothripsis during telomere crisis is independent of NHEJ, and consistent with a replicative origin
Source: HighWire-hosted journal article supplement (doi:10.1101/gr.240705.118), 2019-03-14
Supplement: Supplemental_file_1.zip [file contig.2.DB51_length_569_mean_cov_8.53427065026.docx]

**DB51_length_569_mean_cov_8.53427065026**

ATTTCTCCCAGTGGCTTCATTAGTTTTTCCATGTTTTAAGAACTCTATAGCTACATTTCCTAAGAGACATTTATTTCTGTGTTTCCTAG
 >chr6:82677837-82678049 + E=7e-116
TTATAGGTTTATAGATTACTAGGAGTTCTGGGTCACTGTGTTACTATAAGATTGAGTTCCAACTTTATGACTCATTTTCTAAAAATCAA

TTTTCTCAAGCCACTGTCCATTTAATTTCATTGG|AACATATGGAAAGCAGTCAACAGGATATTCATTAAGTCTAGAAACACAGATGGG
 >chr6:10514974-10515331 - E=3e-200
TATACATAACTTCATCAAGACCATTTTCAATGTGTAACACACACGTGTGCGTGCACTCACAGAGTTTAGACTTAATGTAGATTGGAAAT

CAAGTTCCACATACCTGGAATCCTACTGAGTGTCACCCAGAAATGCTCATCAGGAGAGTCAGTATCTTTTGACCACTCAAGTAAATCAA

TGGCCCTTAGGTTTTGAAGAACAAAATTAGCAAATTCCCTTGTAAGGGCCACATAGGCAGAGCCAAAGTAAATTGTCAGATGGTGGGGA

GGAGGCATTTTTCTCATGCAAGTCCACAGCATGAAG
