# Supplementary material for: Chromothripsis during telomere crisis is independent of NHEJ, and consistent with a replicative origin
Source: HighWire-hosted journal article supplement (doi:10.1101/gr.240705.118), 2019-03-14
Supplement: Supplemental_file_1.zip [file contig.2.DB51_length_573_mean_cov_4.5410122164.docx]

**DB51_length_573_mean_cov_4.5410122164**

CAATTAGACAGAAGTCTAGGCAGTGTTAGTTTGGAGGGGAAAGACACCAGATGGGAGGCCGTTGAGCTGAGATTTTTGGGTAACCTTAA
 >chr6:158469955-158470153 + E=2e-107
GTCTGGTAGGAGTGGTGGGGTGCAGGGGAGAGGTGTGGAGGTGCTGTCTGCGATCCTTGGGCCTCTTGAGTGCTGATCGAGACTCTGCT

GTGACTTCCACAGC|CAGGAG|CACCCAGATTCATAAAGCAAGTTCTTAGAAAGCTTTAAAGAGACTTAGACTCCTACACAATGACAGC
 >chr6:81126468-81126755 - E=3e-147
GGGAGATTTTAACACCCCACTCACCATACTGGACAGATAATTGAGACAGAATATTTAGGGCCACAGCATAGTACAGCATCAAATAGACC

TGATAGGCATTTATACAACTCTCCACCAAACAAACAAAAAAAGCAAATAAAAACCCAGAATACCTAAAACTTAAAGTATAATAATAATA

AAATTAAAAAAAATAAAAATAAAATAAAAAACCCA|CATTGGAAAACTGTAAAATGATCACATTATCCAAAATAAAAAAATTCCCCGCC

AAAGCAAAAAAATTGAAACCCTAAAAAAAAATTTTTAGGAAA
