# Supplementary material for: Chromothripsis during telomere crisis is independent of NHEJ, and consistent with a replicative origin
Source: HighWire-hosted journal article supplement (doi:10.1101/gr.240705.118), 2019-03-14
Supplement: Supplemental_file_1.zip [file contig.2.DB51_length_578_mean_cov_4.3875432526.docx]

**DB51_length_578_mean_cov_4.3875432526**

TTTGGGGCACAATTCCATGACCACCTACTGACTGTGAGGTTTGTCAGCCACACAGAAGAATAAAAAAAGGCACGTAAGACTTGAATTAG
 >chr20:22198119-22198442 - E=1e-176
CATGGTGTGAAAACAAAAGTCAGTAAAAAGAGCCCGGGTGTGAGGAGGTATGAAAATGAAAACATGTTCTGCAAGAAAAGGGGTTTTTG

ATATGCTGAGAGACAAGTGCTGGGGAAATTTAAATTCCCATCTTTTACCAAGCAGCAACCCTGATTTTTATTGCACTTGCTGTTTAAAG

AATTCAACAAGCCTCAGTCCTTTAACTCTAACAGTCTCCAGCTGACATCATGTGAA|TCAA|AACAGTTCATAAAGTCAGCATTCATCC
 >chr20:10864659-10864910 -
CGCTGATAATTTTAGGCAGTGCCCAGTTAACATTCAATCTGTGTTATAAACAATTGCTACTGTGTGTTGTTAATACCACTGGGGACAAA
 E=2e-136
AGGTGCAGCTCTTACAACAGTGATCCAGGAGTCCTTGGATTAATTGACAAGGACTCATGGATTGATTTTCACACCAAGCTTTATCTATA

AACATATATTAATAATATGTTTCATACAAATATATACCCATAACAA
