# Supplementary material for: Chromothripsis during telomere crisis is independent of NHEJ, and consistent with a replicative origin
Source: HighWire-hosted journal article supplement (doi:10.1101/gr.240705.118), 2019-03-14
Supplement: Supplemental_file_1.zip [file contig.2.DB51_length_581_mean_cov_4.28743545611.docx]

**DB51_length_581_mean_cov_4.28743545611**

CTCTCTTTTCTTCTTTAGTAGTCTTGCTAGCGGTCTATTAATTTTGTTGATCTTTTCAAAAAACCAGCTCCTGGATTCATTGACTTTTT
 >chr6:80059387-80059758 - E=1e-170
TGAAGGGTTTTTTGTGTGTCTCTCTCTTTCAGTTCTGCTCTGATCTGTTATTTCTTGCCTTCTGCTAGCTTTTTAATTTGTTTGCTCTT

GCTTCTCTAGTTTTTTTAATTGTGATATTACGGTGTCAATTTTAGATCTTTGCTGCTTTCTCTTGTGGGCACTTAGTGCTATAAATTTC

CCTCTACACACTGCTTTAAATGTGTCCCAGAGATTCTGGTATGTTAGTCTTTGTTCTCATTGGTTTCAAAGAACATCTTTATTTCTGCC

TTCATTTCATTAT|G|GATTATCTCCATGTTTCTAAAGACAGACCAAAACCAGAAGGTTACTTCCAAGATTTAATCTGTACCAACCAGT
 >chr6:91135864-91136076 - E=7e-116
CCAAATATTATTGGTTTTCAAGCATTCGATTTCCCTGCACAAAGAGCATGTACTTTCTTAACAGTGACTTGGCACTAAACTCCGTCTTC

AAATTTAGCTATGCAGTCTTGACTTTGAACTAGACAGGGGATTTCCATA
