# Supplementary material for: Chromothripsis during telomere crisis is independent of NHEJ, and consistent with a replicative origin
Source: HighWire-hosted journal article supplement (doi:10.1101/gr.240705.118), 2019-03-14
Supplement: Supplemental_file_1.zip [file contig.2.DB51_length_604_mean_cov_7.03642384106.docx]

**DB51_length_604_mean_cov_7.03642384106**

AACGGGAGATGGAAGAGCATTTGGCAAGCAGTCAGGAAACTGGAGTTCTTATGCTAGGACCCTGACACTGAATGGTCATATATTTTGGG
 >chr18:68567781-68568054 - E=1e-152
AAAGTCTGTAAGAACCCTGGATCTCCTTATGTGAAAGTAGTTCAGCTAACTGCATCATTTCCAAGACTTAAGTTCCAAAATTTTGTGAA

CGTCTATGTGGAAGCTTGTATATGTAAGATAACTTAATTCTTAGGAGAGTGTCTCAGTTTTTTTCCTGGGGCTGCCATAACAAAGCACT

ATAAAC|AA|GTATGATTCCAAAAATTGCTTCTCTTTCAAGTAGTTACACCTGTGGATACAATGTCTATCACCATAACTTCGACTCCTG
 >chr6:134698001-134698330 - E=3e-186
AGCAAAATGAGAGTGATCATAAGTGGAATCCCTAGTAGGTATATCAATCAGGGCCCCAACAGGAAGCAAGTGGCATACTCCAGGAGGGT

TGAGTAAAGGGACTGTTGATAGGGTATAGGCAGATGTGGGAAAACCACAAAGAAGAGTGACATGCTGGGGCTAGTCACAGCAGATGTTA

CAACCCTGAGGTGTAAAGGAGCAAGAGGAGAGAGTGTGGAAAGGGTCACCTTGAGAGGAGTTATGGTCTTTG
