# Supplementary material for: Chromothripsis during telomere crisis is independent of NHEJ, and consistent with a replicative origin
Source: HighWire-hosted journal article supplement (doi:10.1101/gr.240705.118), 2019-03-14
Supplement: Supplemental_file_1.zip [file contig.2.DB51_length_624_mean_cov_3.92467948718.docx]

**DB51_length_624_mean_cov_3.92467948718**

GTGTATGTGTATGTGTGTGTGTCACTTAACAATTAATCTTCAAATTCCTAAAGAAAATAAAAGGACTAAAAATATCACCTCTCCTCCCT
 >chr6:80951914-80952281 - E=4e-209
GCTCCCACCCCACCAAAAATAACTGAAGAAGAGCAAGTTCGGGAGATTTGCCCTATCAGATATTCAAATTTATTATAAAGCTATATTGT

TAAGATAGAGAGGTATTGTAAGGCTCTAAAAAGACACAAAGAAACATAAAATGGACAGCCCATGAACAAATCCACGTGTACATGAACAG

TGGATACTGTTAAAAGATGCAGAGTGTAGGGTCAAAAATAAAACAGAGCTCTTACCTTAAATCACCCTAAATATATCAAGTATGATTAA

AGGTGACT|AGA|AATGGGTGTTGCTTGGCCAATCTTAGTAACTAATGGATGTGGTCGGAAAAACAGAGAACGTGGAGATTCCCAGAAG
 >chr6:158066867-158067125 - E=2e-140
AGAAACGTGCAGAACGGCAGGTGGAGAAGTTTCCACGGCACCGTCTCTGTTCCCAAGGGCTCACATCTGGAACGGGATGTATGGGAAAA

GCTGGGCTCAACCTTTTCTTTCCTTTTTCTCCTCCATTGCCCCAAACCCAAGAACACGCCCGTGTCCCGTGTGGTCAGGAACTTACGTC

C|CC
