# Supplementary material for: Chromothripsis during telomere crisis is independent of NHEJ, and consistent with a replicative origin
Source: HighWire-hosted journal article supplement (doi:10.1101/gr.240705.118), 2019-03-14
Supplement: Supplemental_file_1.zip [file contig.2.DB51_length_635_mean_cov_6.08818897638.docx]

**DB51_length_635_mean_cov_6.08818897638**

CGGGATCTGCAGCCCGCCATGCCTGAGCCTCCCACCCCCTCTGTGGGCTCCTGTGCAGCGGGAGCCTCCCCGATGAGCGCCGCCCCCTG
 >chr7:140656551-140656887 - E=2e-184
CTCCACGGCGCCCAGTCCCATCAATCACCCAAGGGCTGAGGAGTGCGGGCACACTGCACAGGACTGGCAGGCAGCTCCACCTGCAGCCC

CAGTGCAGGATCCACTAGGTAAAGCCAGCTGGGCTCCTGAGTCTGGTGGGGACGTGGAGAACCTTTATGTCTAGCTCAGGGATTGTAAA

TACACCAATCAGCACTCTGCATCTAGCTCAGGATTTGTGAATGCACCAATCCACACTCTGTATCT|AGCT|TATTAGACCAGTAGAGCG
 >chr7:141431766-14143
CAATAGTGTTCCTCTAGATCTCAAGAGTATCTGTTGGTACCTTAATGTCAGTGTTGACATTTAGAATACATCCATAGAGAAGTAACATA
2069 - E=1e-170
TTTTCTAAAGTATTTTAATTTAACTTCTTTAATGTTACCAGCCCAATGATGTTAATAAAATAATTGTGATAATTAGTTTCCAAGTTATA

TAATGATCTCTGTGCAAAAACAAAACTTACTGAGGTAAGAAATAAGCGTCTAACTGAAATGGAAGGGATGAAACGCTAAGGCCAGTGAA

GACGCAGTCCCTCA
