# Supplementary material for: Chromothripsis during telomere crisis is independent of NHEJ, and consistent with a replicative origin
Source: HighWire-hosted journal article supplement (doi:10.1101/gr.240705.118), 2019-03-14
Supplement: Supplemental_file_1.zip [file contig.2.DB51_length_636_mean_cov_4.48113207547.docx]

**DB51_length_636_mean_cov_4.48113207547**

CCAGAACTTACGGAAGTTGCTTAAATCCTTCAGGTCCTTTGTTGCCTTATGGATAATAATAGCACCTTCATAGCATTGACGTGAAAAGG
 >chr6:164444707-164445036 - E=3e-183
AATAAAATAATGCAAATGAAGCCCACAGTACCAGGCATGTAAGTGCTCAATAAATGTTTGCTACTACTTTTCTGTCCAGATTTTTCAGC

TGAGGATTTGATATTTTTTAAGAACCAGTACTGGAATGACAACTGCCAGGCTTCCGTCAGCTGCCACTGTTCATAGTAAGCACACACAG

GGTTCTCCTCTGCTACTGCACCGATTAAAAATAGATTTTAATTCCCCACAGGACAAAAC|GAA|GTCTCCAATCATATATGATGTTGAC
 >chr6:154450353-154450663 -
ATTGAGAGGAGAGAAAGACCCTCTCACCTTGTTTTATATTGTTTCATATTCAGTAAAAACAACAAGGAAGTAAAACCAAATACAGGCAG
 E=9e-169
CTCAGCGCCAGGCCCGAAACCAGGCCTGGGCCCGCCTGGCCTAAACCCAGTAGTTAAAAATCAACTTATGATTTAGAAGCCGATGTTAT

TCATAGATTCCTTACATTGTATAGAAGAACATTGTTCTGTTCTCTATTGTATAGAAGAACTCCCTGCCCTGTTCTGTTCCTCCCAGACC

ACCGGTGCATGCAGC
