# Supplementary material for: Chromothripsis during telomere crisis is independent of NHEJ, and consistent with a replicative origin
Source: HighWire-hosted journal article supplement (doi:10.1101/gr.240705.118), 2019-03-14
Supplement: Supplemental_file_1.zip [file contig.2.DB51_length_645_mean_cov_15.1782945736.docx]

**DB51_length_645_mean_cov_15.1782945736**

AATATATGTGCAATATATATCTGCAAGATGTATTTGCCTACTCTTACTGAGCTTTCTCAATTGAGTACAAGTTTCAGTGCATTTAGTTC
 >chr12:13203847-13204160 + E=1e-176
ATAAATTGTGGTTTGGGAATGTGGCTGTTTCCTATTTTGTGTTCTATTTTTATTTTTCTGTATTTGTTTTCCTGGTTTTAGGGAAGACA

GTGTGACAGAAATGCCCACTTTTGCCATCATTAACTAGAAGCATGTAATCTTGCTAAACAGACCAATCTGACAGCAGCTTTTTTCTCAA

AGAATGCTTCAAATTGTTTTTATAAATTTCTTACAGATTTTATA|AA|AGTACTATTTTGAATTAAGTTTCTAATAATTGATTTATTTT
 >chr12:13206000-13206334 + E=3e-171
CTTGTAATTTGTGCCCTTAAAAATCAAGTCTAATATTTATTGGGCAAAATGTATAGTTTTGAAAATAAAAATAAATAGAAATAATTTCT

AGTTATTAGGATGACAGATTATTCAGTATTTTCTTTGGATTTTTTTTGAAAGTACTTAATGTTATAATTCTGTGGAATGTTCATTTTAA

AAAATCTAAAATTTATTGATTTTTTTAATGTACCAAATACTAACTTTAAACATCAAAGGTTTTACTTTCATCATCTGGTATTGGGGGAA

TTAGCCTCCTATATTTCAACGTAG
