# Supplementary material for: Chromothripsis during telomere crisis is independent of NHEJ, and consistent with a replicative origin
Source: HighWire-hosted journal article supplement (doi:10.1101/gr.240705.118), 2019-03-14
Supplement: Supplemental_file_1.zip [file contig.2.DB51_length_655_mean_cov_5.98167938931.docx]

**DB51_length_655_mean_cov_5.98167938931**

TTTTAATAATGCATAAGGGGAATTTTTAGGAGGTTCTTTTATTACAAAAGAAATACAGTATATCCTCAGGGTAAAAATATTCAAGTATT
 >chr14:67595770-67595949 - E=6e-96 p=1e-02
TCAGAAATATTAAAAAAAAAAAGTAGAAGTGGCTGGGCACGATGGCTCACACCTTTTATCCCAGCACTTTGGGAGGCCAAGGCAGGTG|

GA|GCACGTAAGCACCCAACTGAGGACTGCATGATGCTGGGGCTTGAGAGAATAAAAAAGAAAAAGTGAAGAGCATAATAGTAGCTAGG
>chr14:68052675-68053125 - E=5e-244
CCAGAGTTAGTTCCCTCCAAATATGTCCCTTTACCTACTAGCTGAACATTGATACGGAGATGCAACACCACCTGAACCTTTGGAATACT

AATTACAGACAAGACCAACAATTTTATCTGGGCAGGGCCCTTGCAGAGCACTAGCATAACCCCAGTTTCCTTTCTAAGCTCCAAGCCCA

CCACATCTTGCCAGAGTAGAACGTTTTAACAGCTGTCAGACCTACCTTGGGAGCAGCCATCCGGAAGATCAACTTCTCAATGTGGCTTT

TTCCAGAGCTCTTGTCTGGGATAGATCTAATCACAAGCATGAAGGCATCCCTGCAGCCACAAAACGTGGTCACTGAAGAGGAGTGGTAA

GTGATG|GGGAGTTGGTGGGGGAAGGAAGAAGTCG
