# Supplementary material for: Chromothripsis during telomere crisis is independent of NHEJ, and consistent with a replicative origin
Source: HighWire-hosted journal article supplement (doi:10.1101/gr.240705.118), 2019-03-14
Supplement: Supplemental_file_1.zip [file contig.2.DB51_length_670_mean_cov_10.9701492537.docx]

**DB51_length_670_mean_cov_10.9701492537**

GAGTGAGTGAGTGTGGAAGGAACATCTGAGGATTGTCCCCAAGAGGGATGGGACTGGCAAAATGTCACTGGCATTGGAAGTAGGAAGCA
 >chr6:7798569-7798892 - E=1e-173 p=2e-02
GACTGTTGGGAACAGGTAGAACACGAACCCTAAATTAGTGTGGTTTTGCTCATTTGCAAAAATGATGTGAGATACTTGCTGAGATGCTC

ATGCGCACTGTATCAGAAACAGTGCTGGACTGGAAGGGTGGTCACCCAGAGCCAACTCTAAGGGGCTGCATGACTGCGAACAGGGACTT

GACCTCTTTTGGCTTCAGTTCACCATCAGTAAGGTGAGGAAAGTGGTCCAGACCA|T|ATTCTGTTCTATTGGCCTACATGACTGCTTT
 >chr6:81124314-81124662 + E=1e-
TATACCAGCACCACGTTGTTTTATTTACTGTAGCCTTGTACAATTTTAAGTCAGGTAACTTGATTTCCAGCCGTGTTCTTTTTGATTAG
197
GATTGACTTGGCTATTGGGGCTCTTTATGGTTCCATAGAAATTTTAAAATAGCTTTTTCCTAGTTCTGTAAAAAATGCCAATTGTAGTT

TAATAGGAGTAGCATTGAACCTTTAAATTGCTTTGGGCTGTTTGGACATTACAAGGATATTGAATCTTCCTATTCGGGAGCATGGAATG

TTTTTTCATTGGTTTGTGTCATTCCTGATTTCTTTGAACAATGTTTTGT
