# Supplementary material for: Chromothripsis during telomere crisis is independent of NHEJ, and consistent with a replicative origin
Source: HighWire-hosted journal article supplement (doi:10.1101/gr.240705.118), 2019-03-14
Supplement: Supplemental_file_1.zip [file contig.2.DB51_length_673_mean_cov_10.0995542348.docx]

**DB51_length_673_mean_cov_10.0995542348**

TGGAACTGTAAGTCCATTAAACTTCTTTCTTTTGTAAATTTCCCAGTCTCAGGTTTGTCTTTATCAGCTGCATGAAAAAGGAATAATAC
 >chr8:88798038-88798371 - E=1e-188
AGTAAATCAGTACCAGGAGTGGGGTGTTACTGAAAAGATACCCAAAAATGTGTAAGCAACTTTGGAACTGGGTAGTAGGCAGAGGTTGG

AACAGTTTGGGGGGCTCAGAAGACAGGAAAATGTGGGAAAGTTTAGAACTTCCAGAGACTTGTTGAATGGTTTTGACAAAAATGCTGAT

AATGATATGAACAATAAGGTTCAAGCTGAGGTGGTCTCAGATGGAGATGAGAAACTTGTTTGGA|AC|ATGGAGTCAGAGGGGATCATT
 >chr8:88796717-8879705
TTGGAGCTTTAAGATTTGACTGCATTGCTGAATTTTGGACTTGCATGAGGCCTGTAGCCCCTTTGTTTTGGCCAATTTCTCTGATTTAG
9 - E=5e-194
AATGGCTGTATTTACCCCAATGTCTGTACCCCCATTGTATCTAGGAAGTAACTAACTCACTTTTGATTTTACAGGCTCATAGGCTGAAG

GATCTTGCTTTGTCTTGGATGAGACTTTGGACTGTGGAATTTTGAGTTAATGCTGTAATGAGTTAAGACTTTGGGAGACTGTTGGGAAG

ACATTTGGTATGAAATGTGAGGACATGAGATTTGCAAGGGGCCGGGGTGGAA
