# Supplementary material for: Chromothripsis during telomere crisis is independent of NHEJ, and consistent with a replicative origin
Source: HighWire-hosted journal article supplement (doi:10.1101/gr.240705.118), 2019-03-14
Supplement: Supplemental_file_1.zip [file contig.2.DB51_length_682_mean_cov_6.03958944282.docx]

**DB51_length_682_mean_cov_6.03958944282**

TGAAGAAGGAGGATTGCTTGAGCTCAGGAGCTTAAGGTGGCAGTGAACTGTGATTGCATCACTGCACTCCAGCCTGGATGACAGCGTGA
 >chr15:25644502-25644833 - E=2e-184
GACCCTGTCTTTTAAAAACAAAAGAAACAAAAAAACAGACACATCGACCCACAAAACAGAATGGAGAGCACAGAAATAAATTCGTGTAC

TATCAGTTGATTTTGGACAGGGTGCAAAGAACACAGTGGGGAAAGGGAAGTCTGTTCAATAGGTGGTGTTGGGAAAATGGAATATCTAC

ATGCATGAGAATGAAATCAGACCTGTATCTCACATCATATACCAAATTCAAGTTAAAATGGATT|TATATATATATAAATAAAAGAATA
 >chr15:25643579-256439
AAATCAGTGCGCTGAAGAGATCTGTACTCCCATGTTCCTTTCGGTATCATTTGCAATACCCATGATACAGCATCAGCCTAAGTGTTCAT
30 - E=2e-199
GGATAAAGAAAATGTGGTATGTATACACAGTGGAATATACTTCAGCCATAAAAAGGAGGAAATGCTGTCATTTGTGACAGCAGGGATGA

ACCTGGAGGGCATTGTTGAAAGTAAGCCAGCCACAGAAAGGCAAATACTACATCTCTCTTAAATGTGGAATCTTAACTCAGGGATGTAA

AATGGTGGTTACCAGGGGCTGGGGGTGAGTGGACTGGGTTGCAGAGGTGTTGGTCAGAGG
