# Supplementary material for: Chromothripsis during telomere crisis is independent of NHEJ, and consistent with a replicative origin
Source: HighWire-hosted journal article supplement (doi:10.1101/gr.240705.118), 2019-03-14
Supplement: Supplemental_file_1.zip [file contig.2.DB51_length_685_mean_cov_5.64817518248.docx]

**DB51_length_685_mean_cov_5.64817518248**

ATTTCACTATTTCATTATGCCTATTCAAATGATCTCAGTCCTTGCCAGCTCCTTACAGCCTCCATTCTTTGCTGGAAATACCCTTATCC
 >chr6:10518657-10518987 - E=9e-187 p=0e+00
TTTCACCTCCTGGCCACCCAACCTGTTCTTCTCCATCACAAACAATAGAGCATTGAAATTCTGTGCCTGCCACCCAGAAAACTGGCAAC

CCACAAAGAACAAGAAAAATGGCTAACATACCTTTAAAATATATTCATCTTTAACAAATTATAAATAACAAGAGTAGCGCAGTTCTTTT

TCTGTTTAATTCAAGTAATTTTTTAAAAGAAATACATTAGGCCAGGTGCGGTGGCTCACGCCT|ATAGCCAGGTGCGG|TGGCTTGTTT
 >chr4:112
CTATTTATATTACTTTGCTTACGAGTAAATGTATAAAGAGTTTGAAGCTCAGAGACTAAATTTGCAGATATCATTTAGACCTTAATTTG
374925-112375266 + E=2e-187
ATATTTATATCTTGGATCATGTAGAGAAGTCTGGTTTTGACAGAAAATTACATGCTTGCTATCCATTTATGATACTGCATTCATTATAA

TGTAATCTTTGCTATGTTGTATGCATTACATTGTTGTTATATTTTATGTATGATATAATCAATAAAGAAATAATAAAAATAATTCTGAA

TGACTGTCTTGAACTGTTTGTACTTCAGCTGGACTATTTAGCAGTGAGTTAAAGCCTCTTTATT
