# Supplementary material for: Chromothripsis during telomere crisis is independent of NHEJ, and consistent with a replicative origin
Source: HighWire-hosted journal article supplement (doi:10.1101/gr.240705.118), 2019-03-14
Supplement: Supplemental_file_1.zip [file contig.2.DB51_length_706_mean_cov_9.13597733711.docx]

**DB51_length_706_mean_cov_9.13597733711**

AAATTATGACTTAATCTTGAATATACTTCTCGTAAAT|ATCATATATAGAAATGGGATATGAATTAACAGAAAATTATTTTCAATATTC
 >chr14:29061637-29061934 - E=7e-155
AATGTTATAGAAATGTCTATGCTTATTGACATTTTTGGTAAGAATTTTTGTTAATAAAATGCATTTGGGTTGCTACTTAACTGATTGTG

AATTAACATTATTTGTGTTATAGAATGAATTGGAAAAGCAAATACTTCTGTGTTCTACTGTCAAATGTGATGCATTCAAATAAGGGAAG

TTATGACAGAAAAAACAAATCTTCCTCAACTTGTCCACATCAGTTCCATTCCCTCATTTATAGGGA|AG|TTTGTTCAAATAATTTAGT
 >chr14:29060683-2906
CAGGATTTGCATACTTAGCATGATTGACTCTGAAGTGAGTTATTGGGCAGTGCCTGGCATTCAATCAGTAACACCTGAGGAGAACATTG
1057 - E=3e-213
CCTTTGTGTTGCAACCAAGAAGAAGTTAAAAAAGGCACAGAGATGAGGGATCTTTTTTTTATAAGGGGAATTCTGATCATTCTTCTCTG

ATCTTGTTTTCAACTTGTGTCTTAATTTCTTCATATTTGATGCCTCAAGTTAATAGGATTTGTATTGCCATAGGCACTATTGCCATTTC

ATATGCTGTATTAGGGAAGCGGAGTTGCTGATTAGAAAAGTGATAATGCAACTTCCTCTTCTTTCTAAATTAACCTTGGAGTGGAA
