# Supplementary material for: Chromothripsis during telomere crisis is independent of NHEJ, and consistent with a replicative origin
Source: HighWire-hosted journal article supplement (doi:10.1101/gr.240705.118), 2019-03-14
Supplement: Supplemental_file_1.zip [file contig.2.DB51_length_715_mean_cov_7.44055944056.docx]

**DB51_length_715_mean_cov_7.44055944056**

ATATGAAGGAAAAACAATTGTAGACTCCTAAAATCAACAGTGTAATTTTTAAAATTCTGAGCAAAGGAATATTTATATCAGTTACTATT
 >chr6:164773575-164773980 + E=7e-232 p=4e-02
TTGGAGAGACCATGAATAGAGGCTAATATCAGGAGCCTTTGGTATTATTTATGCACAAATCTTAGCTTTTCTTTGTTTTTGTTGTTGCT

CACTATCATTACCAAGGGTTTTTTTTGTTTGGTTTGTTTTTTTACTTTTATTTTAGGTTCAGAGGGTCACTTGCAGGTTTGTTACATGG

GTAAATTTCATGTTGCTGAGGTTTGGTGTACAGATGATCCCATCATCCAGTAGTGAGCATAATACCCATAATACCTGATAGGTAGTTTT

TCAGCCTACACCCCTATCCCGCCTTCATCCCTCTAGTAGTCCCTAGTG|T|ATATATATAGTGTATATATATATATATACACATACATA
 >chr6:164744876-164745184 - E=4e-162
TGCATATGTATTTCAAAACATCATAATGTAAACCTTAAATGTATATAAAAATAACTAATTAAAAAGAAGACACTGGAAAAATATCCTCA

ATAAAAAACCCCACAACTCACAGCAAATATTTGAAAATACGACCAAATTTTAAAATAAAATGTGAAATATTTAGCCAGGTACAGTGGCT

CACACCTATAATCCCAGCATTTTGGGAGGCCAAAGCAGGAAGATTGCTTGAGACAAGGAATTCGAGACTGGTCTGGACAACATTACAAG

ACCCT
