# Supplementary material for: Chromothripsis during telomere crisis is independent of NHEJ, and consistent with a replicative origin
Source: HighWire-hosted journal article supplement (doi:10.1101/gr.240705.118), 2019-03-14
Supplement: Supplemental_file_1.zip [file contig.2.DB51_length_716_mean_cov_7.87430167598.docx]

**DB51_length_716_mean_cov_7.87430167598**

GAACTTATATTTGACAGAAGTTCATTACATTTCAATTTAAGTATGTTACGATTTTTATCCTTGGGTAACTTGGTGTCTATGTTAGTGGA
 >chr13:90244634-90245012 - E=1e-215
GGAGGGAGGTTCAAAAACAATAAATGATGTAAGAGTTGAGAGTTCAACTCAGGTTATATTATATGATATAAAATAACACCGATGTGAAG

AATGGGAGGTAAAACTTTAAAAAAAGTAAAATGTAGAAAACTTAAAGAAATTGAGGCATTGGCTGGATGTGGTGGCTCACACTTGTAAT

CCCAACACTTTGGGAGGCTGAGGTGGGCGGATCATGAGGTCCGGAGATCGAGACCATACTGGCTAATGTGGTGAAACCTGGTCTCTACT

AAAAATACAAAAAAAATTAG|CT|AACCACTAAGATTTATAGGGATAAGGGCCCACAGTATGGTGGTTTGGTATACAATCTACCATACA
 >chr13:90232528-90232868 - E=9e-193
TTTGTATGTTCATTTGAATTCTTAATAACACAGGGTTGCTGAAATTTTGGCAATTTCTATTTCCATATATTTTCTATAATGGTTTGTCA

AATGGGAAACATAAAGTTAAAAATGACATTTAAATTACTAGGGAAGACATTCCTAATTCATCTTATCCACTTGACGCTGAGACTTGGAA

CTTCTGTTCTTGTGTACATTTAGTGACATATTTGTGACATATTAAATTTTTTTTAATGTTCTCCAACATGAATATTCTTCTGTTATTCT

GCACAG
