# Supplementary material for: Chromothripsis during telomere crisis is independent of NHEJ, and consistent with a replicative origin
Source: HighWire-hosted journal article supplement (doi:10.1101/gr.240705.118), 2019-03-14
Supplement: Supplemental_file_1.zip [file contig.2.DB51_length_722_mean_cov_5.53462603878.docx]

**DB51_length_722_mean_cov_5.53462603878**

GAGAACTCTAGGTGGAATGTGGTAACTTTTGCCAGGGCAGAGGGAACACCTACTAATAGGTACTTCATTTGCACCACCAGAGATTGGCA
 >chr6:12299105-12299468 + E=1e-206
TCTTTTTTGATGGATCCACTGGCTTTGATACTGCCTGTACTCCCCCAAAACACAGCTTGGGTATTGGACTAATCTAGAGCTCCCTCAGG

AGAACTCTTGCTGACATTAAGAAAGAGCAACATTTTGTCTTTCCAGGTGAAAATCCAAGGCCCAAAAAGGGAGGTGACTCACCTAAGAT

CACAGAAGGAGCTGTAGCATCTCTGGAGCCTGAACACTTAAGTTAAGCACGACTATTTCAGCCAGAGGGCCCCTGGAGGTCTGCAGAAA

CAGATGC|TGTTTCT|GTTTGGGGTGAGCCTTTCTTAGGAGCTCCATTAGCCAACAGCCAAGATACCTCATTTTGCACTCACTTCACTT
 >chr6:158472555-158472837 + E=7e-158
GTGACCAAAGTGTCTTAGGACCAAAAGGGATTTGGGACTTTGTTGAACTGTTTATATAAAAAAAACCTGGCTGGGCACAATGGCTCAAG

CCTGTAATCTCAGTACTTTGAGAGGCCGAGGTGGGTGGATCACTTGAGCCCGGGAGTTCAAGACCAACGTGGGCAGCATGGCGAAACCC

CATCTCTACAAAAAATACAAAAAAAAAAAAA|TGGCGAGGGGTGGGGGGGTACCGTTGTGGGCCGGCCACCTCGGGGGGCGGGGGGGGG

GGGGGGATTGAAA
