# Supplementary material for: Chromothripsis during telomere crisis is independent of NHEJ, and consistent with a replicative origin
Source: HighWire-hosted journal article supplement (doi:10.1101/gr.240705.118), 2019-03-14
Supplement: Supplemental_file_1.zip [file contig.2.DB51_length_726_mean_cov_4.53994490358.docx]

**DB51_length_726_mean_cov_4.53994490358**

TTTGCAAAGGCAGTTTCAATATGGCACTAGAGAAATCTGCAAGCAAACCGTATTCCATCAGTTCGCTGTCATATATTTCCCTTCTCACA
 >chr18:68691653-68691955 - E=7e-170 p=5e-03
GTTTGCCACTCTTAGAAGCCTAAATTCACTTTTCCTTGTCCTGTCATTTTCTACAAATGTATTGTCTTTTGTTAAAGATGCTGTATAAG

TCAGAGCCCTAAGCCACCTCTTCAAGTTACTAATTTTCTTGGGTGTTTCCCATGTACATATGAGATAAATATGTTAATAAACTTGTTTG

TTTTTCTGTAGCTAATCTGTCTTTTATTAGAG|GGA|GTAGTATCACATGTGCTTATTGGTCATTTATAGAAATTCTTGTTTTTTTTGA
 >chr18:68705862-68706264 + E=3e-207
ATTGCTAACATCTTTTGCCCACTAAAAAAAATTGAAATGTCTTTTTATTTTCGATTTAAGCCAAGTTTTTAATATTTGTTACTATATAC

AAATCCGTTTTCAGATATATTTATTGCAAATATTTTCTGCCCATCTGCTGGTTTTCCTTGTCACTTTCTCAACAGAGTTTGGGCAAACA

AAAGTTTTTAATTTTGTTGAAGTTCAGTTTATCCATGTTTTCTTAAATGGTCAGTGCTTTTTGTGTCCTATCTTAAATATTTTCTTAAA

CTTAAAATATTTTCTTCTACATTTTCTTCTAGGTGATTTGGAGTTTTCTTTTTGTTGTTTATGCATACATTGTGACTCA|GATTTATGC

TTTTCTGTTGTGAGATC
