# Supplementary material for: Chromothripsis during telomere crisis is independent of NHEJ, and consistent with a replicative origin
Source: HighWire-hosted journal article supplement (doi:10.1101/gr.240705.118), 2019-03-14
Supplement: Supplemental_file_1.zip [file contig.2.DB51_length_736_mean_cov_8.5597826087.docx]

**DB51_length_736_mean_cov_8.5597826087**

TACTCATCAATAAAAATTCTCACTTTCAGTACACAGACTTCTCCTTCATTTCTCAGTTTTTACCTTCATGCCTCATCGTTTCCATTCTT
 >chr3:53499804-53500192 - E=1e-221
GAATTACAGTCCTCTGATTGGGGGATGGTTCCCACTTCTTCAGAGACTACACCCTTTGACTCTTTCATGGGTGGCAGGGGAAGCAGTTA

AAAAGGAGCTAAACTGATGCACACAATGACATAGATGAGCCTCACAGACACTGTGTTGAGCCATAAGACACAAAACAGTACATTTGTAT

GATTTCATTTATATGAATATGTTGACAAACGACTAAGTTATGGTGAAAAAAACACATAATAGAGGATGCCTCTGGAGGGGATGAGAAGG

AATGTGAAGAAACTTTCTGGGGTGATGGAA|AT|AAAAAAGGAATGAATTAATGGCATTTGCAGCAACCTGGATGAGACTGGAGACTAT
 >chr3:53497866-53498216 - E=9e-199
TAGAAGTAACTCAGGAATGGAAAACCAAACATCATATGTTCTCACTCGTAAGTGAGAGCTAAGCTTATGAGGATGCAAAGGCATAAGAA

TGACACAATGGACTCTGGGGACTCAACAGGAAAGCGTGGGAAAGTGGTGAGGGATAAAAGACTACAAATTGGGTGCAGTGTATACTGCT

TGGGTGATGGGTGCACCAAAATCTCACAAATCACCACTAAAGAACATACTCATGTAATGAAACACCACTTGTTCCCCACTAACCTATGG

AAATAAATTTTTTTAAATAGTGATAA
