# Supplementary material for: Chromothripsis during telomere crisis is independent of NHEJ, and consistent with a replicative origin
Source: HighWire-hosted journal article supplement (doi:10.1101/gr.240705.118), 2019-03-14
Supplement: Supplemental_file_1.zip [file contig.2.DB51_length_784_mean_cov_9.33035714286.docx]

**DB51_length_784_mean_cov_9.33035714286**

CATCAATATGATAGTGGCCTTTCTGAAGTAGAAATTATTACCATTCCTACAAATGATGGATCCATCGTGGTTGGAATAGTCTTGGAAAT
 >chr7:143161728-143162131 + E=1e-227
TATAAACATAACTGGTAGGTCTAGAGTTGGCAAATGTATGACTATAAAATAAACTGTCAGTAACTATTAATGCCCAAATTATAATGGCT

AATGCAGCCATCCTTAATTTCTGCTCCTCAGTGCTCCTGCCCTCTCTCCTCTGTAAACTATTTCCCCAGTTACTTTTGTAATGGTGGTG

GGTAGAAGTGGTTCCAATCATCTATATTTCATGTTTTCATGCAAAGGGTACCTTATGGCATATTCTTCCTCTCCACGTCTGTCTCTCTG

GTTGATATCCATGTCCATGAGCTCCCTAAAGGGGAGCTGTCCCT|ATG|TTTCCCTCTCCTAGGTCCAGCAGGATAGTCTGGACAGGGA
 >chr7:143157440-143157824 + E=3e-219
TAGAATCTGAATATTTTATTTCTGGCAAAATCTTTATGTCTTTGCTCGTTGTTTTCCTATCTATGTCATGACAACTCTTGTAAACATTC

CATTTTTTTCTGTTCAAGGCAGAAATCATAGGCCAGTCCTATCAAAGGTTCTCAGTCAATACTATTCTGCATTATAGCATTATCTTCCA

AGGAGCATGCTTTCAATATATTGACTTTTTACATTTACTATTTTTAACTACTATGGACAAATTTTATATTATGTAAGACTGTCTCAGGC

ATGATATTCGTTGATTCTTAGTCACTTTGGGGAAATTTATTATAACCATTTTATTTTGCATAGTTTTGCATAGT
