# Supplementary material for: Chromothripsis during telomere crisis is independent of NHEJ, and consistent with a replicative origin
Source: HighWire-hosted journal article supplement (doi:10.1101/gr.240705.118), 2019-03-14
Supplement: Supplemental_file_1.zip [file contig.2.DB51_length_787_mean_cov_8.51588310038.docx]

**DB51_length_787_mean_cov_8.51588310038**

CAGGTACATGCACTCAACAGCATGTCCATGAACCCTGTTCTCTTCTGGAGGGTATACGTGGCAGAAGCTCTGGCTCTTTCACATCAAGA
 >chr7:143154753-143155216 + E=1e-263
AGGATCTTAAATTCTGGAGCAATGGCTCATACCTATAATCCCAGCACTTTGAGAGGCTGATGCAGGCAGATCGCTTGAGTCCAGGAGTT

CCAGGCTAGTCTGGGCAACATAGCAAAATCCCATCTCTACAAAAAGTACAATTAGCCAGGTGTGGTCGCATGCGCCTGTGGTCCCAGCT

ACTCAGGAGGCTGAGAAGGGAGGATTGCTTGAGCCCGGGGAGGTCAAGGCTGCAGTGAGCTGTGATCACACCACTGCACTCCAGTCTGG

GTGACAGAGTGCAGTCCCTGTCCTAAAATCAACAGCATTCTCATTCGAGTAAAAAATAATTAAACCTTGAGATATTTTCCTCTGCTTTC

CTATGCTCTCCATTCA|CA|AAAAGGCAAAAGGCAAAAGGGCAAAAGGCATGTGGGCACTCCCTTCAATTTCTTTTGTAAGTGCACTGA
 >chr7:143156586-143156912 + E=3e-184
TCTGTTCATGAGGCTCCACCCTCAAGAATGGATTAGTGCTCTTATAAAATAGACTTAATCACTTCCCCAAAGGCCCAGTCTCTTAATGT

GGTTGCATTGGCAATTAGGTTTCAACATGTGAATTTTGAGGGACACATTTAAACCACAGCAATATCACAAAGAATTCATTAGTTTTAAA

ACTTAAATATTATTTTTGATAATACATGATTATTGCAGAAAATATGGAAAACAGACTATTATTAAAAAGTTAAAAAT
