# Supplementary material for: Chromothripsis during telomere crisis is independent of NHEJ, and consistent with a replicative origin
Source: HighWire-hosted journal article supplement (doi:10.1101/gr.240705.118), 2019-03-14
Supplement: Supplemental_file_1.zip [file contig.2.DB51_length_791_mean_cov_8.43109987358.docx]

**DB51_length_791_mean_cov_8.43109987358**

AACCATTGTTCTGCTTTATGGTACAATAGATTAGTTTGCATTTTCTGCAATTTTACATAAAAAGAATCATAGGGTCTGTACATATCTTT
 >chr3:85947633-85948078 + E=4e-251
CTTTTTTTTTTTTGAGTCTCAACATAAGTATTTGAGACTCATTCATGTTGTTGCATGTACATAGTTTCTTCTCTGTTTTCTTGCTGAAT

AATATTCTATTGTATGGATACATACGCCACAATTAGTTACCTGTTTACCCAGTGATGGACATTCAGGTTGTTTATAGTTTGCAGATATT

ATAGTAAAGCTACTATGAACATTTGTGGGTACAATTTTGTATGGCCATTTGTCTTCATTTTTCTTAGGCAAATGCCTAGATGCAGACTA

GCTGGATTATATGGTAGCCATATATTTAATTTTTTAAAGGCCTTGCCATTTTCCAAAATGTTTGTACTACTTCATAAAATCCAA|TTCA
 >ch
|AACATCAAGAAAAGGTTGCCTCCTAAGATACTAAATTACTTCCTTTGAGTAGTATTATAAAGATGAATTCTCTAAACCCCAAAGTATC
r3:86006074-86006425 + E=3e-196
ACCAGTATAACTTCTATTTTAATATGGGTCTTATGTGACTTTGTGGAAAGGGCAAGATTTCTACATTGCTACAAATCATAGTTTTATTT

TATCATTTTTTGCTGCTTCAAGAGATGTTAACGATGTACATAGCACAAGACAATCTAGCCTGTTATAAAATAAGAATTGGTAAATTCAA

ATAGCAGTGAAAAGATTTAGGATAAATGAAGCATGTTGAGAACTATTAATAATTTGGCTTTTATTAAGGATACTAGGGGAG
