# Supplementary material for: Chromothripsis during telomere crisis is independent of NHEJ, and consistent with a replicative origin
Source: HighWire-hosted journal article supplement (doi:10.1101/gr.240705.118), 2019-03-14
Supplement: Supplemental_file_1.zip [file contig.2.DB51_length_812_mean_cov_6.28325123153.docx]

**DB51_length_812_mean_cov_6.28325123153**

AATGTTGAAAACAGAGTTCACTCCCAGGTTGGGTCTACTTGAGCCAGACAGTCATTGTCAAAAATCACATGCCCCAAATGGGCAGAGTT
 >chr18:60833087-60833428 + E=3e-190
CGTTTGCTGGATCGCTTTAAAGCTGTGCCGTCTGCCTTGAAGCAAGTCCACTGTCATTTTGTTAAACAAGGGTCCTTCATCCAATACTG

GTTATGGCCAGGGTTGCAGACCCACAGGACACAAAGCCTGGCCCTCAGTATGAGGACCAGCTGCTGGCTGGCTTCCTCGGAGGGGGACT

GTGGGCTTGGGGGGCACTCACGGCTTTATAGACTGCCCAGTCCCATGCCCCAGAGAGAGGTGGTTGGCAGGA|AG|GATCTTAGTGTTT
 >chr10:2954673
TCAGGAGAAAAATGAATGAATGAACTAATCCCCTTCTGGAGAAAACTCAGGATGTGTTGATGACTGGAACTCCTTGTCAACTTTTCCCA
4-29547202 + E=1e-269
GATGCTTTCATGAGTTCGAGGTCAATCTTTTCTGGGAACAGTCCAGCAATTTCACCCCAAGTGTCAACTTTGTAAAAATACTCGGTAGA

CAAGAATCCAGGAATGGTTCCTTAATCTATGGCACCCAAGGCCAAGAGAGCAGACAGTTTTCCCAGGCTGCTCAGGGTTGACTTTACTA

AACCGACCATAATTCATACTAACACCTTGAATAATGAGGAGCTCTAAACACATGAGAAAATCCAATAAAGTATTTTAGAAGACAAACAA

GAAGACTAGCAGTAGACTTGCAGTGCCAGGTGCTATTACAAAGCTGCAGTAATTAAACGAATATGCCAGTAGCCCCAGAATGGACAAAG

AAGTCAAT|AAAAA
