# Supplementary material for: Chromothripsis during telomere crisis is independent of NHEJ, and consistent with a replicative origin
Source: HighWire-hosted journal article supplement (doi:10.1101/gr.240705.118), 2019-03-14
Supplement: Supplemental_file_1.zip [file contig.2.DB51_length_860_mean_cov_8.1511627907.docx]

**DB51_length_860_mean_cov_8.1511627907**

C|GATATGAACAGATACTTCACAAAAGAAGACATTCATGCTGCCAACAAACATATGAAAAAAAGCTCATTATCACTGGTCATTAGAGAA
 >chr10:31852070-31852538 - E=1e-266
ATGCAAAACAAAACCACAATGAGATACCATCTTACACCAGTTAGAATGGAAGTCATTAAAAAGTCAGGAAACAACAGATGCTGGGAGGA

TGTGCAGAAATAGGAACACTTCTTTTACACTGTTGGTGGGAATGTAAATTAGTTCAACCATTGTGGAAGATGGTGTGGTGATTCCTCAA

GGATGTAGAACCAGAAAATACCATTTGGCCCAGCAATCCCATTACTGGGTATATACCCAAAGGATTACAAATCATTCTGCTATAAAGAC

ACACGCACACATGTTTACTGAGGCACTATTCACAATAGCAAAGACTTGGAACCAATCCAAATGCCCATCAATGATAGACTGCATAAAGA

AAATGTGGCACATATACACCAT|GGA|TTTAACCTGAAAGTGGTTTATTCTTGTTATCCAATCGTAGTTTCACTCTTTCGAACATGGTA
 >chr10:31159665-31160059 - E=4e-213
TGAAAGCTATTTTCTTAAGCTCTCTATTTTTTTCTTTTCCTCCTTGGCCATATCTCCCCTTTCCTCTCCATCTGGTGAAGGAACACTGA

TCTGGACAGCTGAGCTCTGGTCATTGTTACATGCTTCTTTTTAGGCTCTGTGATCTTGGCCAAATAAGTAAACCTCAGTCCCTTCATCT

TTCCAATGGAGATAGTAATTCTCGTCCTGTAACAGTCAAATGCAGTAGGTATGGTTGATTCTCATTATTTGTAGTATTTATATTCTAGA

AGGCTATTAGGAACTCTGAATTAGCAAATACTGAGCCATTTGTTCCTAGGCGATATTCAAGG
