# Supplementary material for: Chromothripsis during telomere crisis is independent of NHEJ, and consistent with a replicative origin
Source: HighWire-hosted journal article supplement (doi:10.1101/gr.240705.118), 2019-03-14
Supplement: Supplemental_file_1.zip [file contig.2.DB52_length_407_mean_cov_3.31695331695.docx]

**DB52_length_407_mean_cov_3.31695331695**

TCAAAGAACTGAAAATGCAATTATCATTTGATCCGGCAATCCCACTACTGAGTATCTACACAAATGACAAGAAATCCACAATATCAAAA
 >chr13:54076418-54076562 - E=4e-72
AGATAACCTGTGTTTGTAAGCTAATCACAGCATTGTTCACAATAGCAAAGGTT|TG|TTCCCTGACCACTGTTATATCACATTAGGTGT
 >chr13:54075676-54075941 - E=4e-1
AAATTATAAAATTTGAAAATATCTGCTTAGAATTTACTTATAGCTTTAAAAGAATTCTACTGTCTATGCCTTCTTAGAAGCTGGATATT
39
GGTGTCATTTTCTATCTTATGTGGTAAATCTCTAGGGGCAGTGGTAATGCTTATTTACATTACTTTTACTCACTACTTTTAACACTGAA

ATGTGAAACCAGGTCTCAAAAATAAATGTTTGTGATGACTCATTCCTCAGCCT
