# Supplementary material for: Chromothripsis during telomere crisis is independent of NHEJ, and consistent with a replicative origin
Source: HighWire-hosted journal article supplement (doi:10.1101/gr.240705.118), 2019-03-14
Supplement: Supplemental_file_1.zip [file contig.2.DB53_length_266_mean_cov_2.25563909774.docx]

**DB53_length_266_mean_cov_2.25563909774**

CAATAACATGGCTGTATTGTTCCAAAGAAGG|AATATAGGTAAATA|TTCTTACAAAACACCAGGGGTCCAGTCTAGGTTCTGCTGCTC
 >chr7:154481639-154481670 - E=2e-07 p=4e-02 >chr8:130160886-130161107 - E=3e-122
ACTACACAGAAAGCCAATCACTGAGATGATGAGTATTGCCAGGAAAGAAGGCTTTCATCAGGTGTTGCAGGTGAGGCAATGGGAGATCA

GTCTCAAACCATCTCCCTGATTTACTAAAATTAGGGGTTTATATAGCAGGGAAAAAATGTAACTATGTGTGGGAAAATAGGAAGCAGGG

A
