# Supplementary material for: Chromothripsis during telomere crisis is independent of NHEJ, and consistent with a replicative origin
Source: HighWire-hosted journal article supplement (doi:10.1101/gr.240705.118), 2019-03-14
Supplement: Supplemental_file_1.zip [file contig.2.DB53_length_271_mean_cov_13.0553505535.docx]

**DB53_length_271_mean_cov_13.0553505535**

GCGTTGCACAGGCCGCCTGCCTGCGCGGGCACCCTGCCAGCTTGTCCCGGGTGCCTTGCTCTTCGATTCTGAAACCAGATCTGAATCCT
 >chr3:75718368-75718578 - E=4e-85
GGACTCCGGGAGGCCCATCTCTCTGGCCGGATCTTCCCTGGCGGCGATGCCTGGAAAGCGATCCTTCTCAAAGGCTCGGAGGAGCAGGG

CGGTCTGGGATCTGGTGACGGCGGTCCGCTTT|TGCGGATGT|AACAAGAGTTACATCTCCTGGGTGATCAGTGTAGAAATATGTCACA
 >chrUn_gl000225:87796-87848 - E=6e-14
AAGCCC
