# Supplementary material for: Chromothripsis during telomere crisis is independent of NHEJ, and consistent with a replicative origin
Source: HighWire-hosted journal article supplement (doi:10.1101/gr.240705.118), 2019-03-14
Supplement: Supplemental_file_1.zip [file contig.2.DB53_length_273_mean_cov_1.96703296703.docx]

**DB53_length_273_mean_cov_1.96703296703**

GAATTCAAGGTCATGAAGACATTATTTAACCTTTTAGAATATTTTATATAGCTTAGAGTACACAATGAAGTAGGGGAAATTAGTGATTA
 >chr8:79150933-79151098 - E=4e-85 p=0e+00
AGAAATCATTTATTATTATATATTT|TTATTATACTTTAAGTTCTAGGGTACATGTGCACAACGTGCAGGTTTGTTA|CATCGGTATAC
 >chr17:68796206-68796338 - E=4e-44
ATGTGCTGTGCTGGTGTGCTGCACCCATCAACTCTTCATTTACATTCAGTCTTGCTCCTAATGGTATCCC|CCACCCTACCCGTCACGC

CACTACGGA
