# Supplementary material for: Chromothripsis during telomere crisis is independent of NHEJ, and consistent with a replicative origin
Source: HighWire-hosted journal article supplement (doi:10.1101/gr.240705.118), 2019-03-14
Supplement: Supplemental_file_1.zip [file contig.2.DB53_length_275_mean_cov_5.49454545455.docx]

**DB53_length_275_mean_cov_5.49454545455**

CCCAGAAAGAGAAAGTAACAAGGAACAAAGAAAACACCACAACAAA|CCAACCTGGGTGACAGAATAAAAAAAAAAAAAAA|A|AAAAA
 >chr10:108470173-108470207 + E=4e-03 p=
AAAAAAAAAGCACAGGTCCCAACCAATTTTTTAACTACTTGTATACATATATCAAAATTGTCTAATGTACCACTACACTCCAGCCTGGA
0e+00 >chr8:131399786-131399949 + E=2e-78
TGACAGAGCGAGACTCCATCTCAGAAAAAAAAAAAGCCCAAGTCCCAACCAACTTTTTAACCACT|CTTATATATACAGCAAAATTTTC

TATTTCATTAAA
