# Supplementary material for: Chromothripsis during telomere crisis is independent of NHEJ, and consistent with a replicative origin
Source: HighWire-hosted journal article supplement (doi:10.1101/gr.240705.118), 2019-03-14
Supplement: Supplemental_file_1.zip [file contig.2.DB53_length_276_mean_cov_4.08333333333.docx]

**DB53_length_276_mean_cov_4.08333333333**

CATAAAAAACTTCCATCAAAAGGAATATGTATCTTGCTTCTTGGAAAGGGAAGTTTACTTTTCTGGGGCAGGGCTTAA|TGA|AGCTTT
 >chr8:125797613-125797691 - E=1e-35 >chr8
AAAAGAATTAGAAGCTGCTAAAACTGATTGGATTGTAGCTGTTTCCCTGAGACTTTGGTCTGGAATCTCAGGATATAAAGGTGCTAAGA
:135482680-135482875 + E=2e-106
GGATGAGGCCACATCCCAAAGCCCTTTCCACACAGTAGAAGTTGAGGCCCAGAGCAAAGAGGGGTGCCTCTAGGGTCACATGCAGAACC

AGGGGCAGAAT
