# Supplementary material for: Chromothripsis during telomere crisis is independent of NHEJ, and consistent with a replicative origin
Source: HighWire-hosted journal article supplement (doi:10.1101/gr.240705.118), 2019-03-14
Supplement: Supplemental_file_1.zip [file contig.2.DB53_length_288_mean_cov_12.28125.docx]

**DB53_length_288_mean_cov_12.28125**

ACAGACACAA|AAAGAGACACAGAGAGAAAGACAGAGATGAACAGAGAGAGACAGAGAGAAACAGACAGAGAGAAGGTCCTAGCCCAGT
 >chr2:133029279-133029405 + E=4e-47 p=2e-02
AGCGATACAGTGCCTTTTCTTTCATTTTCTCTTTCTTTTCTTTT|TGTCTTTCTTT|TATGTATGTATGTATGTATGTATGTATGTATG
 >chrUn_gl000220:130905-131050 -
TATGTATTTATCTGGAGACCGGGTCTCACTCTGTCACCCAGGCTGTAGTGCAGTGGCACGATCTTGGGTCACTGCAACCTCCGCCTGCC
 E=7e-52
AGGTTCAAGCAATTCTTCCACCCC
