# Supplementary material for: Chromothripsis during telomere crisis is independent of NHEJ, and consistent with a replicative origin
Source: HighWire-hosted journal article supplement (doi:10.1101/gr.240705.118), 2019-03-14
Supplement: Supplemental_file_1.zip [file contig.2.DB53_length_311_mean_cov_3.0578778135.docx]

**DB53_length_311_mean_cov_3.0578778135**

AACATCAGCACTGATCTCAACCCCATCCCCACATCTGTAGAAGTTTCAAGATCACCAGGTGGCATAATAACAACA|T|CAAGTAATCTG
 >chr7:154886651-154886727 - E=2e-34 >chr1:16107
CCCGCCTTGGCCTACCAAACTGCTGGAATTACAGGCATGAGCCACCATGCCAGGCCTGTCCAAAGAGATTTTATATTGGTACTATTTAT
7220-161077390 - E=4e-91
TACAGAAAAATTGGAAACAACCTAAATGTTCTAACGCAGAGGATTAGTTAAGCTTTTTTTTTTTTTTTT|ATTTATTTTATTGTTTTAT

GTTCTTTTTTGGATTGTTGTTGTTTGTGGTTTTCTTTTTTCATTGTT
