# Supplementary material for: Chromothripsis during telomere crisis is independent of NHEJ, and consistent with a replicative origin
Source: HighWire-hosted journal article supplement (doi:10.1101/gr.240705.118), 2019-03-14
Supplement: Supplemental_file_1.zip [file contig.2.DB53_length_349_mean_cov_1.94555873926.docx]

**DB53_length_349_mean_cov_1.94555873926**

CCCTTCCCTCCAGAATGGCGACCGAGTGCGACACCCACTAAAACACTA|AAAAATTAAAAAATAAATAACGCACTCCTAAATAGTAGTC
 >chr8:75098269-75098505 - E=1e-109
CCTGTATCTTTCTTTCTCCCCATCTGGATTCAAAATCCTTGGCAGAGCCAGGTGCGGTGGTTCGTGCCTGTAATCTTAACACTTTGGGA

GGACGAGGTGGGCAGATTGCCTGAGCTCAGGAGTTTGAGACCAGCCTGGGCAACAGGGCGAAACCGCATCTCTACTAAAAATATAAAAA

ACTAGCCGGGCA|TGGTGG|CACGCGCCTGCAGTCCCAGCTACTCGGCAGGCTGAGGCTGCAGAATCACTTGAATCTGGGAGGTG >chr3:139105914-139105985 + E=3e-31
