# Supplementary material for: Chromothripsis during telomere crisis is independent of NHEJ, and consistent with a replicative origin
Source: HighWire-hosted journal article supplement (doi:10.1101/gr.240705.118), 2019-03-14
Supplement: Supplemental_file_1.zip [file contig.2.DB53_length_374_mean_cov_25.1844919786.docx]

**DB53_length_374_mean_cov_25.1844919786**

AACTAGCCTCGCCAACACGGCGAAACCCTGTCTCTACTAAAAATACAAAAGTTAGCTGGGCGTGGTGGCGTGTGCCTGTAATCCCAGCT
 >chr7:152371496-152371790 + E=1e-135 p=1e-03
ACTCGGGAGGCTGAGGCAGGAGAATCGCTTGAACCCGGGAGGTGGAGGTTGCAGTGAGCCGAGATCACACCATCGCACTCCAGCCTGGG

CGACAGAGCGAGAGTTCATCTCAAAAAAATATATATTTATATATAAAAAATATGTTTATATGTATTATATACTTTCTATATAATCTATA

TTATAAATATATTTTTAAATATATATT|ATATATAAAAATATA|TTTGTATTGTTAGTAGAGACGGCATTTCTCCATGTGGGTCAGGCT
 >chrUn_gl000220:143168-143231 + E=2e-26
GGTCTCGAACTGGCGACC|TC
