# Supplementary material for: Chromothripsis during telomere crisis is independent of NHEJ, and consistent with a replicative origin
Source: HighWire-hosted journal article supplement (doi:10.1101/gr.240705.118), 2019-03-14
Supplement: Supplemental_file_1.zip [file contig.2.DB53_length_400_mean_cov_7.4675.docx]

**DB53_length_400_mean_cov_7.4675**

CATGGTACTGCTACAAAAACAGACACATAGACCAACGGAACAGAATAGCGAATCAAGATATAAGGCTGCAGCCTGGGTGCAGTGGCTCA
 >chr1:243114612-243114960 + E=2e-195
CACCTGTAATCCCAGCACTTTGGGAGGCTGAGGTGGGTGGATCACCTGAGGTTGGGAGTTCAAAACCAGTCTGACCAACTTGGAGAAAC

CCCATCTCTACTAAAAATACAAAATTAGCTGGGCGTTGTAGTGCATGCCTGTAATCCCAGCTACTCAGGAGGCTGAGGCAGGAGAATCG

CTTGAACCCAGGAGGCAGAGGTTGCGGTGAGTGGAGATTGCACCATTACACTCCAGCCTGGGCAACAAGAGGAA|AAAGAAG|AAAGAA
 >chr20:46540
AGAAAGAAAGAAAGAAAGAAAGAAAGAAAGAAAGAAAGAAAGAAAG208-46540267 - E=5e-24
