# Supplementary material for: Chromothripsis during telomere crisis is independent of NHEJ, and consistent with a replicative origin
Source: HighWire-hosted journal article supplement (doi:10.1101/gr.240705.118), 2019-03-14
Supplement: Supplemental_file_1.zip [file contig.2.DB53_length_406_mean_cov_5.68965517241.docx]

**DB53_length_406_mean_cov_5.68965517241**

TTCCTAGCTCTGAACTGGGGCCCTGGCTGGGCCTAGGACAGACACTGAGTT|TTA|TGCTTTCTTGACATAAAAATAAGGACTTAAAGA
 >chr8:135539774-135539825 - E=4e-19 >chr8:135550846-135551171 - E=4e
ATTCCAGCTTTTAACACATTCAATCTCATTTTCTCTCAACTCAATTTGTAAATCTTCAATGTACGTCTTTTTAATCTTTATCTTTTTTT
-168
TTTTTTTTTGTGACAGGGTCTCACTTTGTCACCCAGGCTGGAATGCAGTGGCGCAATCTTGGCTCACTGTGACCTCTGTCTCCCAGGTT

CAAGCAATTCTCGTGCCTCAACCCCACAAGTAGCTGGGACTACAGGCATGTACCACCATGCCCGGCTAATTTTTGTATTTTTAGTAGAG

AAGGGGTTTCGCCATGTTACCCAG|AGGACAAAGGAAGGTGGCTTGCAGAGGG
