# Supplementary material for: Chromothripsis during telomere crisis is independent of NHEJ, and consistent with a replicative origin
Source: HighWire-hosted journal article supplement (doi:10.1101/gr.240705.118), 2019-03-14
Supplement: Supplemental_file_1.zip [file contig.2.DB53_length_412_mean_cov_39.8422330097.docx]

**DB53_length_412_mean_cov_39.8422330097**

CCGCTTTCGCCTGCCTTCTTACGGGCCGCGTGTCCTGGGCCAGGGCCGAGATTCCCGTTGCTGCTGCCTCAGCTGGCTTGACCTCTCAT
 >chr4:191002196-191002566 - E=5e-136
TCTGAAACCGAATTTGGACAGTGGGCTCCGGAATGCTGATGGCCTGGGTCAGCCGTTCTCTGGTGGCGATGCCCGGGTATGGGTTCTGC

TCAAAGCAGGCTCGCAGGGCCTAGCTTTGGCTCAGGGTCCAAACGAGTCTCCTTCGCCGTCCCCGTCCCTGGGCTTCCGCGGGGAGGGT

GCCGTCCGAAGGTGTCGGGAGGGCCATCGCGGGGAGCCCCGGCCGGAATTTCACGGACGGACACGGGCAGAGAGAGGCCGGCGGGCTCC

CGTGCACCTCAGCC|AGCGCAA|CCAGGAGGCCTGCCCGGACAGCCAGCCAGCGGCTC >chrUn_gl000216:138767-138802 - E=
