# Supplementary material for: Chromothripsis during telomere crisis is independent of NHEJ, and consistent with a replicative origin
Source: HighWire-hosted journal article supplement (doi:10.1101/gr.240705.118), 2019-03-14
Supplement: Supplemental_file_1.zip [file contig.2.DB53_length_427_mean_cov_5.26932084309.docx]

**DB53_length_427_mean_cov_5.26932084309**

AGTGAAAAATCTCCTTCCTCCCTGGGCCCCATTCACCCAGTTCTTACACCACTCTAATAGGAAACTATTATTTTGGGTTCTATGTACAT
 >chr4:19079095-19079465 + E=1e-211 p=0e+00
TCTCACAGAGCTGTTAGGCAGAAAAAAGCAATGCATAATGCTTGTTTGTTCAATTTTTGACAACTTTGTTAAGGTATAATTGGCATACA

ATACATGATACATGTTTAACATGTATAATTTCATAATTTCTGACATAAATACGTCCATGAAACCCTCCCACAATCAAGAGAGTAAACAT

ATCCATCAATCTCAAAAGCTTCCTTGCACTCCTTTGTCATCTCTCTCTCCTGCCCTCCCATGTCACTCCCACCTCCATCCCCAAGCAA|

CCACTGATTTGCTTT|ATGTTACTGTAGATTAGTTTATATTTTCCAGATACACTGGTTTATTTTACTCAGCAT>chr4:19085550-19085622 + E=8e-32
