# Supplementary material for: Chromothripsis during telomere crisis is independent of NHEJ, and consistent with a replicative origin
Source: HighWire-hosted journal article supplement (doi:10.1101/gr.240705.118), 2019-03-14
Supplement: Supplemental_file_1.zip [file contig.2.DB53_length_443_mean_cov_13.7336343115.docx]

**DB53_length_443_mean_cov_13.7336343115**

CTTCGTTTCTTTTTGGTGCCTAGGGCACCATTTGACCAATGGCCTGGGGCCTCTTTGAATCTCTTCTCCTT|C|TGATGTGCAGGAAGC
 >chr8:75087895-75087967 - E=9e-32 >chr8:75095375-
CTCTGGGTGGGTGCTGGGCTCAAAGCTCCTCTTGCAATTCTTTTAGATTGGTCACCATCTTAATCATTTCCAGGTTATGCTGGTTCAGT
75095747 + E=9e-213
CAATGATCAGATATTTATTGAGCATGTACTTGAGGCAAGGCATCAAACTAGATATTGTAGAGAAACAAAAAGAAGTTTCAGTCACAGGC

TCTGCCCTTTAGATATTTGTAATCTCTTTGGGAGAGATGTTTCAGGTTGAAATAGGCATGGGAAATGTCAATTATATAAAACAACATTG

AGCATATAATATAATCATGAAGAACAGCCTTGCTACAAAATATTGGTAGTTCAGAGGATTAAATTAACACACACTAAGAGATGCCATGT
