# Supplementary material for: Chromothripsis during telomere crisis is independent of NHEJ, and consistent with a replicative origin
Source: HighWire-hosted journal article supplement (doi:10.1101/gr.240705.118), 2019-03-14
Supplement: Supplemental_file_1.zip [file contig.2.DB53_length_464_mean_cov_5.23275862069.docx]

**DB53_length_464_mean_cov_5.23275862069**

TGAAATCAAAGCATCACGATTGAGCCCAGAACATGAAAAAGAACTTCCTGGCCCACTTGAG|A|CCCCGTCTCCACTAAAAAATACAAA
 >chr8:133135759-133135821 - E=1e-25 >chr8:133473634-133474036
AACTAGCCGGGCGTGGTGGTGGGCACCTGTAATCCTAGCTACTCAGGAGGCTGAGGCAGGAGAATTGCTTGAACCCAGGAGGTGAAGGT
 + E=1e-203
TGCAGTGAGCCAAGATTGTGCCATTGCACTCCAGCCTGGGCGACAAGAGCAGGACTCCGTCTCAAAAAAAAGAAAAGAAAAGAAAAGGC

ACCCACTGCCTTCCAGGGTGCCTGTACCATTTTTCCATTCCCATCAGCAATGAATCACAGTTCCTGTTGCCCTACATCCTTGTCAACAT

TTGACATTGTCCTCGCTTTGGATTTTAGCCACCCCCATTCAAATAGGTTTGTAGTGAGATCTCATTTGGGTTTTAATTTACAAATCCCT

GACGAAATGATATTGAGCAT|A
