# Supplementary material for: Chromothripsis during telomere crisis is independent of NHEJ, and consistent with a replicative origin
Source: HighWire-hosted journal article supplement (doi:10.1101/gr.240705.118), 2019-03-14
Supplement: Supplemental_file_1.zip [file contig.2.DB53_length_466_mean_cov_7.8991416309.docx]

**DB53_length_466_mean_cov_7.8991416309**

GCTCAATTAGAAAGCGACATACAAGATAAACACAA|GGTCCAAAAAACAAGACAGGGAGACCATTAGCATAGCTATTATTAAGTGTTGC
 >chr8:135549215-135549542 + E=2e-179
ACAGAAGTTCTTAACCAAAGTAATGAGATCTAACATGATAAATATTACTGATTTCTCTAATTTTTACTGATAGCTACTATATGCCAGAT

AGCTCTAAATGTTTTGCATGGATTAATTCCTATAAGTCTCACATCAAGCTCATATGGTACGTGCAATTATTATCCTCATTTTTACAGGT

AAGGAAACTGAGACACAGAATGGTTTAGAGACTTGCCATAGTTTCACAGTCTCCCAGCCTGGTTACTTGGTTTGCATCAGATTTGGGGC

CCCAG|GC|ATTACACACTGATGTACACCTCCATGGTGCACCCGCCTCCATCACACACTGATGTGTGCCTCCATGGTGCACTGCCTGCA
 >chr7:155828495-155828601 + E=3e-52
TCACATACTGATCTTGCAGGCCAC
