# Supplementary material for: Chromothripsis during telomere crisis is independent of NHEJ, and consistent with a replicative origin
Source: HighWire-hosted journal article supplement (doi:10.1101/gr.240705.118), 2019-03-14
Supplement: Supplemental_file_1.zip [file contig.2.DB53_length_469_mean_cov_8.18123667377.docx]

**DB53_length_469_mean_cov_8.18123667377**

CTGGGACTAAGGTGTGTGCCACCATACCTGGCTAATTTTTGTATTTTTTAGTAGAAATGGGGTTTCACCATATTGGCCTGGCTGGTCTC
 >chr3:64296642-64296865 + E=1e-119 p=3e-02
GAACTCCTGACCTCGTGATCCGTCTACCTTGGCCTCCCAAAGTGCTGGGATTACAGGCCTGAGCCACCGCACCCAACCTAAATAAATAT

TTTTAAAATTAGAGTTTGAATAAAAGATTCAAAGGAAAATGG|ACA|ACCACACTGCAAAGAAACCATTCTTGTCTCTATCTGAGATGA
 >chr3:64303858-64304107 + E=2e-138
GGAAACTGTTACGTGGTTGAAATGGAATTTGACCACAGGGTCCTGTAGTACAAAAGCACACTCAATTAACTGCTAGGTCATCTTCTAAC

TCCAATCCCTTGTTATCTAGGTCTTCAAAGCAAGAACTTCTATTGTACCATTGTACCTACTATATGCCAGGAACTGTTCTAGGCATTGA

TGATAAAGCAGTGATCAAAACAAGCA
