# Supplementary material for: Chromothripsis during telomere crisis is independent of NHEJ, and consistent with a replicative origin
Source: HighWire-hosted journal article supplement (doi:10.1101/gr.240705.118), 2019-03-14
Supplement: Supplemental_file_1.zip [file contig.2.DB53_length_480_mean_cov_5.56458333333.docx]

**DB53_length_480_mean_cov_5.56458333333**

AACCTAAGTTTAGTTTTGACTATCT|TTTTCTTAATAGCTTTGGGTAAATAATTTATTGTTTCTATCTTAAACAATGGTCCCTTGCCTT
 >chr8:125426073-125426311 + E=1e-125
TGCATAACTTTCAGTACATAAGTTTGAATGTAATTTATAAAATTGAGATGGTTATTAATAAGAATAAAGAGATAAGGTGTTTTCTCAGA

AAGCATGCATAATTAATATTATTGCCTTAATGATTAAATTGTACTTAATGAACCATATTCTGCCAGAGTCTGAAGTAGTCCCTTGT|CT

CTGTTACCCATGCTGTAGTGCAGTGGTGTGATCTTGGCTTACGGCAACCTCCGCCTCCCAGGTTCAAGTGATTCTCTCTCCTCAGCCTC
>chr7:155691334-155691551 + E=5e-113
CTAAGTAGCTGGGATTACAGATGCGTGCCACTACAGCCCTGCTAATTTTTGTATTTTTAGTAGAGACAGGGTTTCACCATGTTGGCCAG

GTTGGTCTCAAACTCAGGTGATTGGCCTGCCTTGGCC
