# Supplementary material for: Chromothripsis during telomere crisis is independent of NHEJ, and consistent with a replicative origin
Source: HighWire-hosted journal article supplement (doi:10.1101/gr.240705.118), 2019-03-14
Supplement: Supplemental_file_1.zip [file contig.2.DB53_length_507_mean_cov_13.6055226824.docx]

**DB53_length_507_mean_cov_13.6055226824**

AATGGGATAAAATACTCACAGACTATGCATCTGACAAAGGGCCGGTATCTATAATCTATGAGGAACTCTTAACAATTAAACAAAAAGCA
 >chr8:83572904-83573127 - E=1e-122
AATGAGCTCATTAAAATGTGGGCAAAGGACATGATCAGACCTTTCTCAAAGGGAGATATACAAGAAGGCAACCAACATGAAAACATGCA

CCACATCACTAATCATCAGAGAAATGCAAATCAAAACTGCA|ACAA|TGAAAGTCCTAGAATATCTTGAAAATTTTGAGCAATGACTAG
 >chr8:83566249-83566537 + E=9e-162
GCTTGTCTCAGTTATTAAGGAAGGATCACTGCAAATTCATAAATATTGCTTTGAATTGTTCAAATACTGCAGACCCTTGAGAAGTGCAT

CCACCAAACAAGGCTGACTGTAATGACAAGTGAGTGGGCAGAAACCATAATGCAATTAATTTACAGATTGTGTAAAAGGAACATAAACA

CCATGTTAAAATGGGTTTATCAGTTGACTTCGGTATAGGTATAGATTTTGAAAATGTTGTCAGC
