# Supplementary material for: Chromothripsis during telomere crisis is independent of NHEJ, and consistent with a replicative origin
Source: HighWire-hosted journal article supplement (doi:10.1101/gr.240705.118), 2019-03-14
Supplement: Supplemental_file_1.zip [file contig.2.DB53_length_514_mean_cov_3.60700389105.docx]

**DB53_length_514_mean_cov_3.60700389105**

ATTACCAAATCTGCCTGTTTAAGGAAAGGCACAAATTCAGATTGTTAATGTGAAATCTATTGACTTGTAAGTGTTGGCACCTATTTTTA
 >chr8:128734814-128734994 + E=1e-96
AATGTTATAAATGCTGAGAGGGTCAAAACCTGTCATCCAAGCCAACCTACCAGTAAGCAAGACTTGGTCCTCAAGCAAGTTTGCTGCCT

C|T|AACCCAAGAAGATATTAAAATAGAAATTAATCTTTGGAGCTTTTGCTTCATTGACCTCTAACCCTTACTGTAATCAGGAGGAAAT
 >chr8:131154299-131154634 - E=4e-190
GTTCTTGTGTGCTGGGCATCCAGCTGTTATTCTCCGAGCTATATCAGATTACTTTCTTTCCAGGCTGGACTGCAGAGTGACCGCAGAAG

AGAAGGAGTGGGGGCTCTGACCCATCCAAACCACTTTCTTACCGGGAGAGCTTAGGAATGTTACTTAACCTTTCTGTGCCTTTATTTCT

TCACTTAGTAAAAGAAACTGAAGACTTCCCTCACAGGTAGTACATGAGATAGTATATGACATAAGATGCCT
