# Supplementary material for: Chromothripsis during telomere crisis is independent of NHEJ, and consistent with a replicative origin
Source: HighWire-hosted journal article supplement (doi:10.1101/gr.240705.118), 2019-03-14
Supplement: Supplemental_file_1.zip [file contig.2.DB53_length_548_mean_cov_9.85401459854.docx]

**DB53_length_548_mean_cov_9.85401459854**

AGAATCCAAACTAAAATTAACCATAAGTAGCTCTACATGGTAAGACCAAAGAGTACAAGGAATGGTGTGCAGGGACAAAAGATACTGCA
 >chr6:37214775-37215033 - E=1e-143
GCAGGGGTCTATCATAGTAGACTTCTAAGGCCATATAAGTCTTATGTTACCTTTTCCTCTAGGCAATGGGACATTCATTGCCAGTTTAA

GCTGGGACATGACATGACCAGATCTGCATTGTAGAAGGACCACTCTAGTCACATATCTATTAAATGGCTTCTGCTACAC|T|GTTTATG
 >chr6:3
TGATGTTATTGTGACAATATACGGCCAACACACATATGATTCTCCAGATTTCTCCACAAGTCTATGAGCCATGGTTTTTCTGCTTAAAT
7212179-37212470 - E=2e-163
CAGCCAAGAGTTGGCACTTGTTGCTTGCTCTGACTTACACAGAGAAAGACTGAAAGTAAATTAGAGAGAAACATGGGGTCAAGGGAGAA

GTTGAGGTAGACGAGACTTCAACATGTTTATAGGCCAAGGATTGGAGGCAGTTGTATTTGTTAGGCTATAAGTGTAGCTGGAAAATAAT

AGTGCTTTAGACACAA
