# Supplementary material for: Chromothripsis during telomere crisis is independent of NHEJ, and consistent with a replicative origin
Source: HighWire-hosted journal article supplement (doi:10.1101/gr.240705.118), 2019-03-14
Supplement: Supplemental_file_1.zip [file contig.2.DB53_length_578_mean_cov_4.05190311419.docx]

**DB53_length_578_mean_cov_4.05190311419**

ATGGTATAAATACAAGCATTATGCTGAACTCTTTGCCAGAGGAAATAGAATGCAGTCTTTTGTTCTCAGGTCCAAGATTGGGAGAGAGA
 >chr8:132144639-132144849 - E=1e-114
TTGGGTCAGGTAACATTCAGGTTCCCTTCAAACTTTTAGACCCTAACTACACTTTTCTTTCCCTCTACCCTATTTATTGCCAGCCAAAG

GCCTCATGGAAGAGTCCTGTAGCCCAG|CAAAG|CTGCATTTATCACACACATTGATGTTTCTTACGTGCTTAATAACCTTTTTAGGAA
 >chr8:132143892-132144265 + E=7e-210
TGGGATTTTAGGGTCAAAATACATTGTGGGAGTGGATGCATGTATATTATCATACTGCCTTCCAAAAGGATGTATCTCACATTCTCATC

AATATTTTGTAAGAGCGGCCATCCCCACCCCTCCATTGCTACAATTATTTTTAAAAATTATTTTAAATTTTATTTTTAAAAAATTAGTT

AAAATAAACCAAAAGTATGTATCACCTCAAATAGGAACTTATCCTTAATTCAATTAGAGCCATGTTAACATTGAGTTATGTGGGGGATA

GGGAAACAGTTTGGTTTTTCTGTCACTTTCACCCAGTATCAATGGG
