# Supplementary material for: Chromothripsis during telomere crisis is independent of NHEJ, and consistent with a replicative origin
Source: HighWire-hosted journal article supplement (doi:10.1101/gr.240705.118), 2019-03-14
Supplement: Supplemental_file_1.zip [file contig.2.DB53_length_583_mean_cov_4.56946826758.docx]

**DB53_length_583_mean_cov_4.56946826758**

TCTCTAACATTCATGTATGAGTTGGCTGTTCATATGGATCAATATATCACTTATTACCCAATCCTTTAAGGCTTGATTTATTTTCCTTT
 >chr8:135846222-135846560 + E=1e-188 p=1e-02
CCCTTCAGATTGTAAAACTCTTGAATGGCAGGAACCCTGTCTAGTTCCACATCGAATTTCCAGCCTGTTCCTCAGTAACAGCACCACTC

AACAACTAGCTATTGAATGGCTGAGTGAGCTCCCTGCCTATCTTATAAAATTATTAGGGGCAAACTTTATTTTTATATTTATATCTCAA

TACCAGGAATTTTCTGGGAAGTTAAGAATTTCCAATAAATCTTGGACTACTCTAAAATGCACCAGA|AATTA|AGTTGTATGATTTTTC
 >chr8:135482087-1354
TCAAGCTTGCAAAAGCAATTAATGCTTCCCGCCCCAGCCAGGGGTGGGGACTCTTTGGTTCAGCTGCCTTCCTGGCGAGGCTAGGGAAC
82337 - E=9e-139
GTCCTAAAATTCAGACTCTATGTTGGTATTTCTGAGCTCCACAGATCCCACCCCTCACACTCCAATAGATCCACTCAACCCCCAGCTCC

GGTCAGGGTGGGATGTGAATTTCGACCCAGATTTTCCTGTCCCTACCTGTG
