# Supplementary material for: Chromothripsis during telomere crisis is independent of NHEJ, and consistent with a replicative origin
Source: HighWire-hosted journal article supplement (doi:10.1101/gr.240705.118), 2019-03-14
Supplement: Supplemental_file_1.zip [file contig.2.DB53_length_595_mean_cov_3.85378151261.docx]

**DB53_length_595_mean_cov_3.85378151261**

CATTATGTCATTTTGTGTTGTCAGCAGCCATTTCTGATCAGTGGTTAGATATCTAATTAATTAGAGATTGAAAAGGATGATATTCCAGT
 >chr8:133718759-133719139 - E=5e-217
TTGATCACATCTTCTTTATTGGGAATATATCTGTGCAAGGAAACATCTACCGTCTGATTGCCCAGTGGTTCAGATTTTATAGGAAAGGA

GAGATGAATGCTTGAGTCTTTTCCTGTATTTGCTAATTTTCAAAACAAAAAGTTTATTTCTTAATATCTTTTAAAGGTGGCCAGGATGC

TATGTATAATCAGCATTTATATATATGAAGGAACCATGTTTAATATATAAAATTTCCCAAAAGGCACACCCTCCAACTTCCAAACTCTA

TATACTTTGTACCTCATCAAGATG|GATAA|TATTGAGAGTTGCTTTATCACCAAGCATGTGGGCAATCTTAGAGTATGTTCCATATGC
 >chr8:130825355-130825565 + E=1e-114
AGATGAGAAGAATATATAATCTGGGTAGCTGGGTGGAATATTCTGTAGATTTCTATTAGGTCCAATTAGTCAAGTGTCAAATTTAAGTC

CAGAATTTGTTAGTTTCCTGCCTCAATAATCTAATGCTGTCAGGGGAGTGTTGAAGTCCCCCA
