# Supplementary material for: Chromothripsis during telomere crisis is independent of NHEJ, and consistent with a replicative origin
Source: HighWire-hosted journal article supplement (doi:10.1101/gr.240705.118), 2019-03-14
Supplement: Supplemental_file_1.zip [file contig.2.DB53_length_620_mean_cov_6.53225806452.docx]

**DB53_length_620_mean_cov_6.53225806452**

CTTAAACAACTAACCAAACCACACATGCAGAAAAATACTGCTAAAAGGCAAATCATTATATTGACATCAACATGATAATAATATCAGAA
 >chr5:80384586-80384859 - E=1e-152 p=2e-02
ATATTCATAGCTGACAGAAGTGCCTTAAACATGTGGTACATAACAAGGAATTAATAACATATGGGCATGAATAAAGGGAGAAATTGTTC

ATGATTGTTTTCTCTCCAATTGCAGTGAAAAAAAATGACATTCAGTATTTGACCTTCCAGCATTTTTCATTATTGAATGTTTTTTCAAG

CTCAG|A|TTGTAGATTTAAAGAATGGCAGTTATAGCAAAAACCTCCTTTTCCTCCCCAATTGCCTAATCAACATTTAGGGCCCCCTCC
 >chr5:80527565-80527913 - E=1e-197
ACTCACCCGACCTCAACACCTTATATTTTATAGAGTAAATGTTTATGTTAGTAAGGTCAGAAGAAAAATTGGGTCATTGTTGAGAAAAG

AGGGTACCACCCTTCTTTTGGGGGACTGGTCCTCTTCAAGCTTATTATAAAGGTGGTGTGATGGGGATGAAATCTCTACAAGGGACTCA

CAGTAGAAATTCTGGCTTTCTGGAAATCTTTCAAATGCCATCCCTGTCACATGGCATCTATTCCCTTCTCATCGTTACCAACTCCTTT
