# Supplementary material for: Chromothripsis during telomere crisis is independent of NHEJ, and consistent with a replicative origin
Source: HighWire-hosted journal article supplement (doi:10.1101/gr.240705.118), 2019-03-14
Supplement: Supplemental_file_1.zip [file contig.2.DB53_length_651_mean_cov_11.8832565284.docx]

**DB53_length_651_mean_cov_11.8832565284**

CTGGTGGCTAAATATTTTCTTTTGGCTTCTTGATCAATAAACAGCAGGAAGCTCTGGCTGTCCATTAGAATGCTTTCAGTAGCAAGACA
 >chr8:81115198-81115501 + E=1e-164
GAAAGCCCAACTCAAACTATTTAATTATAACAGAACTGGAAAGTTTAAAGGTAGAGCAGCCTTCAGAATGATTTGATTCAGTAGCTCTG

TAATAGCAAAGAACCTAGTTAGGGAGACAATCAAAATGTCTCACTTTTTCCTCTGGTCATACTGTTATAATACACACAACCATATAATG

ATACATCCTGTCTAGAACTAAGCCTACCA|ATAGATG|TGAGCCACTGCACCCTGCCAGGTGTGAGCCACTGCACCCCGCCAGTAATTC
 >chr8:87682915-87683270 + E=7e-199
TCTTATTAACCCATCTGTACTGTCTTAACTTTGTTCTCTGTCTCACCACTCGTACCTTCCTGGATTACTCTCAAAATAAACTGTACGTA

AATCATTTTCTCAGGGTCTGCTTTTGGGAGATCCAAACTAAAACATCTGCAAAACACAGGTCCCCTCAGCACTTCTTTCTTCCCAGTAC

TTGGAGGGAGCAATGCTTACCAGTTTGTGGGCTGGCTTCGGGTGAGGAGAGATCTCCCTCTACCAACTTTTTCTTGTAGAGGGCTGTTC

TTTGACGCATTCTTTTCACCAGGTTGTGTA
