# Supplementary material for: Chromothripsis during telomere crisis is independent of NHEJ, and consistent with a replicative origin
Source: HighWire-hosted journal article supplement (doi:10.1101/gr.240705.118), 2019-03-14
Supplement: Supplemental_file_1.zip [file contig.2.DB53_length_652_mean_cov_6.4754601227.docx]

**DB53_length_652_mean_cov_6.4754601227**

TACTTGGGAGGCTGAGGCAGGAGAATCACCTGAACCCAGGAGGCAGAGGCTGCAGTGAGCTGAGATTGTGCCACCGCACTCCAGCCTGG
 >chr3:69971169-69971502 - E=1e-188 p=0e+00
CGACAGAGTGAGACTCCGTCTGAAAAAAAAAGCAATGGCATAGTCAATCCTCAAATCTCTATATATTGTGTGGTAGACAGAAAAGAAAG

CGAGACCTCAACATGAAAGAAAATACTTCATTTCTATCATCAAGGGGCTTACAACCCAAGGGTTAGGTGGGGGAAACAGGGAGAGTAAC

CCACACAGAAATTTACAGTAAGGTGCTCCTGCCTATTAAGATGGGAGCTCTCAACTGTAC|AGGCAG|GGGAATTGCTTGAACCAGGGA
 >chr3:69969809-69970134 -
GGTGGAGGTTGCAGTGAGCCGAGGTCGAGCCACTGCACTCCAGCCTGGGCAACAGAGTGAGACTCTGTCTTGTAGGGACCAGCCCCACA
E=8e-184
GGGTCGGTGGGTCTCTCCCCGTGTGCAGTGACGAGAGAGTGTAGAAATAAAGACACAAGACAAAGAGATAAAAGAAAAGACAGCTGGGC

CCGGGGAACCACTACCACAAATGCGCGGAGACCGGTAGTGGCCCCGAATGTCTGGCTGCACTGTTATTTATTGGATACAAAGCAAAAGG

GGCAGGGTAAAGAGTGTGAGTCATCTCCAAT
