# Supplementary material for: Chromothripsis during telomere crisis is independent of NHEJ, and consistent with a replicative origin
Source: HighWire-hosted journal article supplement (doi:10.1101/gr.240705.118), 2019-03-14
Supplement: Supplemental_file_1.zip [file contig.2.DB53_length_701_mean_cov_6.57774607703.docx]

**DB53_length_701_mean_cov_6.57774607703**

TAAGGGCTGAGTAGGGTATTATTCATAATTGTTATTTAATTTGGTCTTCTTCCCATCTTCCTTCTAACAGAAGGCTTTTCTGCCTTGAA
 >chr8:129902915-129903287 - E=5e-212
AAATTACACCATTTAAAGATGCCCTATGTCTGTGATTATATGCTATATAACCTGGCAAATATTCTTCAAATAAAAGCCCACAAGTCCAG

TAAAATTTGCAGTAGCAGATGACATTTTCACCAAAGAACAGAGCCAGTTTTTCACGAAGGTAGAAGAAGGACCCACCCCCACTTGACTA

TCTTGTTTATTTGACTGACTTCATTAATCCCTGGAGCTTCCTGATAACTCCAGGAAAGCATCCAAACTCATCTCTGTCTGGCTCCTTCT

TGTGTCACCAGCCCC|A|AGAACTGAAGTACTGTCAAGAACTTTCTTTTTGTGAGCAGAACTTTACATTCCTAAGATAATTTTTAAAAA
 >chr8:121496804-121497134 + E=9e-184
TACAGTTTTATTGAGATATAATGCATACCATACATTTTACCCTTTTAAAGTTTACAATTCAGTGGCTTTTAAAATATAATCACAGAATT

GTGCAACTATCACCACAGTCAAGTTTAGGGCATCTTAATCTCCCCGGAAAGAAACCCCATACGCGTTAGCAATCATTGCGCATTTCCAC

CACCCATTCCTCCTCCCTACCCCTAAGCAATCTATTTTGGTCTGTATAGATTTGACTGTTCTGGACATGTCATGGAAGTG
