# Supplementary material for: Chromothripsis during telomere crisis is independent of NHEJ, and consistent with a replicative origin
Source: HighWire-hosted journal article supplement (doi:10.1101/gr.240705.118), 2019-03-14
Supplement: Supplemental_file_1.zip [file contig.2.DB53_length_723_mean_cov_5.54910096819.docx]

**DB53_length_723_mean_cov_5.54910096819**

ACTCTCTGAGGCCCCTTCCCTCAGCTGTGACTTGGGACAAACCATACCTATCTCACAGGGCTATTGTGAGGCCAACGCAAATCTGCAGG
 >chr8:134772055-134772314 + E=5e-144
GGATTCTCAGCTCAAGAGGAAGAACACAGCAATTCGCAAATGGCAGCTGTTATTAGTTTACATTTAAATCTAGTTTTGCTGATTTGACA

TGTTCACTTGTTAGTTTTAAAAATAGCCTTCAGGCCGGGGGCGATGGCTCACACCTGTAATCCCAGCACTTTGGGAGGCCA|TG|ATGG
 >ch
CAGAAGGTGAAGGGGAAGCAAGGCATCTTCACAAGGTGGCTGGAGGGAGAATGAACAGGAGGAACTACCAAACACTTTTAAAACCATCA
r8:132348253-132348713 + E=4e-251
GATCTCCTGAGAACTCACTTACTATAATGAGAACAGCATGGGGAAGACCACACCCGTGATTCAATTACTTCCACCTGGTCTCTCCCCTG

ACTCTCGGGATTATCAGGGTTATGGGGCTTACAACTGAAGATGAGATTTTGGGTGAGGACACAGCCAAACCATATCACCAACACTTTAC

CCTGATACTGGTTCCGACAAGACTGTTCTTTGTACTACAGTGTAATAATACCAATAATTATAGCCAAAGTTTAGCCGAACACTTATTAT

GAGCCAGACATATATTAAATGTATGTGTATTAACAATTCGAGATAGGTATTACTATTTTTCCACTTTATTAGTGAGAAGCACGAGGCAC

AGTGACTGAATTA
