# Supplementary material for: Chromothripsis during telomere crisis is independent of NHEJ, and consistent with a replicative origin
Source: HighWire-hosted journal article supplement (doi:10.1101/gr.240705.118), 2019-03-14
Supplement: Supplemental_file_1.zip [file contig.2.DB53_length_730_mean_cov_13.2164383562.docx]

**DB53_length_730_mean_cov_13.2164383562**

GGGATCTTCACGCTCATGACCTCATCTAAACCAAATTATCTACCAAAGGCCCCACCTTCAAATATCATAACATTAGGGGTTAGGGCTTC
 >chr8:85432974-85433396 - E=4e-242
AATATATGAATTTTGAGGAGACATATTTCAATCCACAGCAGTTCATATTATCCAACAGTAAGAACCCACTTTTCGTTTTGAAGCTTTGG

GGAAATGGAATAAGCTCCCTCTGAGCCATAAGAGGCAATGTGATTGTTGCTATATTTATTCTGTGAGGGCTCGTGTAAACCAGTGGTCC

CCAAACTGTTTGGCACCAGGGACTGATTTCATGGAAGACAATTTTTCCATAGGATGCAGGTGGTGGGACAAGGGTGAGAGATGGTGAGG

TGGTTTCAGGATGAAACCATTCCACCTCAGATCATCAAGCATTAGTTAGATTCTCGTAAGGAGCAC|AATTTGATAATAAAATGTAAGA
 >chr8:85457824-85458
TATCTTTACTTGTAGATATGACTATATAGTTTGAGAAGCAGAAAATATCAACAGGACCACTTAAGAAAGAGACAACTTGTAAAGTATGT
132 - E=2e-170
CATTATAATATTACTCCCCCAAAGCTCAGTAGCATTCATATATGAAAACAAAATCAGTTGTAAGATATAAAGAAAAAAAGATATAATGT

GAGAAAATACTCTATTTATGCTAACAAATTTAAAAGAACGTATTAAAACAGAAACATAATAAATATACATGAGGATCATACATGAAGTA

AACCATAAAACACTTCCAA
