# Supplementary material for: Chromothripsis during telomere crisis is independent of NHEJ, and consistent with a replicative origin
Source: HighWire-hosted journal article supplement (doi:10.1101/gr.240705.118), 2019-03-14
Supplement: Supplemental_file_1.zip [file contig.2.DB53_length_733_mean_cov_8.99454297408.docx]

**DB53_length_733_mean_cov_8.99454297408**

AAGAGATTAATGAAGATTATAGGGTGATTAAGGCTTTCATCCATGTTCTCAGTTGCCACTATCACTGATGGCAACAAAGTTACAATGTG
 >chr10:57688830-57689180 - E=9e-199
AATTTAAACATAGCTTTTTTAACTTGAATCTGCTTCCCTTCTTTTCTTGGAATACTAAAACACTAACATTCCCAAAACATCCATTTATA

TTAATAGAGTTAAGTAAAGGGTGTATAAACAGGAACACAATAATTCTTCTAAGTTATACCTTATCTACTGTATTATGTAAAGCCAAGTA

AACTTATTTCAAAAAAGAAGGAATTGGATTTTGCAAAAGATTAAAATAATTTTGTACCATCAAACTCTATCAAACTTCTGCT|T|GATT
 >chr
TTGTCATGCACGTCCATGTGAAGAGACCACCAACAGGCTTTGTGTGAGCAATAAAGCTTTTTAATTACCTGGGAGCAGGTGGGCTGAGT
10:57736161-57736523 - E=6e-191
CCAAACAGAGAGTCAGCAAAGGGAGATAGGGTGGGGCAGTTTTATAGGATTTGGGTGGGTAGTGGAAAATTACAGCCAAAAGGGGTTTT

TCTCTTGCAGGCAGGGGTGGGGGTCACCAGGTGTTCAGTAGAGGGAACTTCTGAGCCAGGAGAAGGAATTTCACAAGGTAATGTCATCA

GTTAAGGCAGGAACCGGCCATTTTCACTTCTTTTGTGATTCTCCAATTTCTTCAGGCCAATTGGAGGTACACATGCAGGGTTGGTCTCA

G|GGGTCGAACCGTTCGCACTAAA
