# Supplementary material for: Chromothripsis during telomere crisis is independent of NHEJ, and consistent with a replicative origin
Source: HighWire-hosted journal article supplement (doi:10.1101/gr.240705.118), 2019-03-14
Supplement: Supplemental_file_1.zip [file contig.2.DB53_length_752_mean_cov_8.12234042553.docx]

**DB53_length_752_mean_cov_8.12234042553**

TGCAGCTGTGGCCCTGATCAGCCAGCGAAGCTCACATTTATTCAGTATGTAAGTGACAAAAGTCTTGAGTAAACACCACTAGAGGGTAA
 >chr21:23746865-23747174 - E=4e-174
TTGACATTGCCGACACCCCCCTCCTCCCGCGCCCCAGTAGAGAGCAATTATGCACCGGTGGGAAATCAAAGGTTGGTCTTAGGACCACA

TGAGTAAACAAGCTATTTAGATAAACTCCCTTGAATTCCTTTGTTATTTACCCTTGCTATTAGCTCAAAGAGGATTAGGCTGCTTCAGC

AGTATCTTTTACTGAAGCTATGCAAAACCCCGGCCTTCCTGG|CTGGGGT|CAAGCTGTCGATGAATCCATCTTTCTGGGTGGGGTCTG
 >chr21:23745171-23745607 - E=2e-250
GAGGACTGTGGCCCAATTCCCACAATTCCACTAGTCAGTGCTTCAGTGGGGACCCTGTGTGGGGGCTGCAACCCCACATTTCTCCTTTG

CATTCATCGACAGCTTGGAAGGCACTCAGTGCTAGCCCATGAAAGCAACTGTAGAGACTGTACCCTGCAAAATCAGATGTAAGGCATAT

CTAGTGAGGATTAATTCTTTTTTATTTTATTTGGAAAGTCCTTATCTCTTCATTTTTGATGAATAAGTTTTCTCATGTTCATGAGTTGA

AAGCCTTATTACTGTTAAAATGTCCATACTACCTAAAGTGATCTAAAGTCCCAGTGTAATCTCTACCAAAATCTTGATTTTTTAATATA

GAAAGAGAAAGAAGTTCCAAAATTTATGTGAAACTGCAAAAG
