# Supplementary material for: Chromothripsis during telomere crisis is independent of NHEJ, and consistent with a replicative origin
Source: HighWire-hosted journal article supplement (doi:10.1101/gr.240705.118), 2019-03-14
Supplement: Supplemental_file_1.zip [file contig.2.DB53_length_772_mean_cov_11.4507772021.docx]

**DB53_length_772_mean_cov_11.4507772021**

TTCCACCAAAAACCTATGGAAATAAAAAGTAAAAATAAAATAAATTAAAAAAGAAAAAAATTTTCTTTTAAAGCATCACCTGTGAATCA
 >chr6:68507074-68507469 + E=8e-226
GAGAATCCTCACCAGACACTGAAACTGCTGTCACTTAGGTCTTGGACTTCCCAGCTTCCAAAACTGTGAGAAATATGTTTTTGTTGTTT

ATAGACTCCAGTTTGAAGTGCTTTGTTATAGTAATCAAAATTAACTAAGACAGATGAACACTCCAGGCAGAGGGAGTAGCATTAGCCAC

TATCAAAAGCATGACATGGTACATATGTGTTTTCATATTGTTAGGGCAAAAGTTAAGTGTATTTATAGACTGGTTAGATATTGTCGAAT

TCCCCTCCAGAAAGATTGTGTCATATTACATTCTCAT|GA|ATCATCCGTCGCAACACTAGGAGCTTGAGTTCCAGCAAGGCCCGCAAC
 >chr6:68508320-68508699 + E=3e-216
CACAAGCTGAATTGTTCTGGGGCCCTAAATACACTTGAAAGGCAGTCTAGATAGCAAGAACTGCAATTCCTGGACAAGTCCTGATGCTG

TACTAGTCTCAGAGCCAGTGCACTTGGAATGCATGTGACCTAATGAGGTACCAGCCAGGGTAACAAAGGGACTGCTTGTGTCACTCCCT

TCCCCATCCCAGGCAGCATAGCATGCAGCTCCAGGAGAGACTCCTTCCTTCCACTTGAGGAGAAGAGAAGGGAGAGTAAAGGGGACCTT

TTCTTAGAACTTTGATACCAGCACAGCTGCAGTAGAATAGGGCACCAAGCAGAGCCCTGAGG
