# Supplementary material for: Chromothripsis during telomere crisis is independent of NHEJ, and consistent with a replicative origin
Source: HighWire-hosted journal article supplement (doi:10.1101/gr.240705.118), 2019-03-14
Supplement: Supplemental_file_1.zip [file contig.2.DB53_length_778_mean_cov_12.2197943445.docx]

**DB53_length_778_mean_cov_12.2197943445**

ATAACAAACATGAAAAAAAGAAAAAGCAAGGACCCTGGAAACTCCATACAATACTCTATTTTTTCCACTTTGGATACTTAACCTATCTC
 >chr8:88670546-88670952 + E=2e-223
TTTTTGGTAACTAAGATATGCTCTCAATAGCCAGAGCATAACAGAGAGAATCCATTTCACTCCAATGCTTATGATTATGACTAAGATTA

TAAGTTATATGCTTTTAAGATTGCCTTCATTCATGCAGTGTATAGTGAGAATTTAATTTGTAGCAAATATCTAACAGTGGATGGGAAGA

AAAATGGCTTTACACACAAGAGGTTGCATGCTATAATAAAAAGAATCATAGAGTATGAAGCAAGGCCAAACTAAATTTGAATCTTTGAC

TTCCAGGTTGGAAATATATAAAGTTTTAGCTGAGAAACCTTTAATGAG|TC|TCCATAGGGAGTCATTTCCAACCCAACCAGTCAGCAC
 >chr8:88051669-88052043 - E=4e-210
TCCAGTTCACTGGCCCCTATCCAACAAATTGTCCTTAAAAATGTCAATCCCCAAATTCTCGAGGAGACTAATTTGAGTAATTACAAAAC

TCTGGTCTCCAGCACAGCCAGCCCTGCATGAATAACTCATTCTCTATTGCAATTCCCCTATCTCAATAAATTGGCTCTATCTAGGCAGC

TGGCAAGGTGAACCTGTTGGGTGGCTACACATACATTTTTTTTAACAAAAGAAACTGGAAGTGAGAAATAAAACCAAAAAGCAGTTTCT

TAGAAAGGGACAATAAAATAGATAAACCTCTAGTAAATCCCACCCCCCCAAAAAACCATGGGGAAATA
