# Supplementary material for: Chromothripsis during telomere crisis is independent of NHEJ, and consistent with a replicative origin
Source: HighWire-hosted journal article supplement (doi:10.1101/gr.240705.118), 2019-03-14
Supplement: Supplemental_file_1.zip [file contig.2.DB53_length_788_mean_cov_4.89847715736.docx]

**DB53_length_788_mean_cov_4.89847715736**

CTGAATCATCCCTTTATCATTACATAATGACTTTCTTTGTTCATTTTCATAGTTATTAATGTAAAGTGTATTTTATCTTGCATAAGTAT
 >chr8:131942103-131942512 + E=3e-228 p=5e-02
AGGTATTCCTGCTTTCTTTTGTTTTTTATTTGCAGGTAATACCTTTTCTATCCTTCACTTTCAATCTATGTGTGTCCTACAGGTAAAGT

GAGCCTTTGTAAGCAGCATATAGTTGAGTCTTGTTTTTCATCCATTAAGGCACTCTACATTTTTTGATTCTAGAATTTAATGCATTTAC

ATTACATGTAGAGACTTGTTAATTGTTTTCTAGTTGTTTTGTAGATCTTGTGTTACTTCTTCCTTTCCTTTTGTGTTCCTCTGAGGTTA

AGTGATTTTCACTAGTGTTATATTTGGATTCCTTCTTCTACTTTTTTTTTTTT|GAGAATATAGTCTTACTTAGACTCTAAGGAGCAAG
 >chr8:132413853-132414232 - E=4e-
TCGTACTTTATTTCTTTATTTTTTCAATAATGCATAAAACTTTTGGTACTAGAGTTATTTCCACTAGACTCTATGCTGTTTGAATTTCA
204
GGAATGTTTCTTACTCATGTTTATATTTTCTATACCTAGCATAATACCTCACACATATTATGTCTCAATAAAGAGTTGTTGAACTAATG

AGTGAATTAATTCAAACATGACACCATTAAATAAATGGAAACAGTGATTTATAATAAGATATTGGATCTTGCATCATAGAGAAATATGC

TGTCTCAGGATTCTTTTCCATCACCTTCAATACCAGGCATACACAGGGCTCGTTAACAATGTCAGATGCATCCCTCA
