# Supplementary material for: Chromothripsis during telomere crisis is independent of NHEJ, and consistent with a replicative origin
Source: HighWire-hosted journal article supplement (doi:10.1101/gr.240705.118), 2019-03-14
Supplement: Supplemental_file_1.zip [file contig.2.DB53_length_796_mean_cov_10.9246231156.docx]

**DB53_length_796_mean_cov_10.9246231156**

AGTCTATATAAAAAATACAAA|AAAAACAAATCAGTAGTCACTGTATAGCCTTATCCAGGACTAAGTAGGGTTCACATCTTAGAAAATA
 >chr8:87813832-87814231 - E=3e-225
TCGCTTAAAATGAACTTTTCAAGCAGAAATATTCCTAGGCTAGGGATCATTTACTTGGCACAGAGAAAGACTTGAAATTTGGTCATGAA

AAATCTCACAAACCCACAGTCCCATTTACCCATACAAAACATTTAGACTTAAGGAAAAATAATCTCTGCATAGCATTTATTGCTATATT

CTAAGTCTGTATTCTAAAATATCTTTTTTATCTTGGACCAAAAATATTTTATGTAAATCAACCTTCTTTTATAGTGTCTTGAAAGGAAA

ATCTGATTCTGTTTATATAAATTTTCTTAGTCTGTTCTTCCAAGAAAGTATTCTTACACAGAATA|CAGAAAGTAAAGTGGTGGCTGAG
 >chr8:78941781-789421
CATGGTGGCTCACGCCTGTTAATCTCAGCACTTTGAGAGGCTGAGGCAGATGGATCATCTGAGGTCAGGAGTTTGAGGCCAGCCTGGCC
57 + E=2e-214
AACATGGTGAAACCCCGTCTCTACTAAAAATACAAAAATGAGCCGGGCCTGGTGATGCGTGCCTGTAATCCCAGCTACTCGGGAAGCTG

AGGCAGGAGAATCACTTGAACCCGGGAGGCAGAGGTTGCAGTGAGATGAGATCGCGCCATTGCACTCACTCCAGCCTGGGCAACAGAGC

GAGACTCCGTCTAAAAAAAAAAGTAGTGGTGAAATAGCTACTCCACCGACAATGTAGGGTGTTCCTGAAAGTAAGAGGAGGAATGC
