# Supplementary material for: Chromothripsis during telomere crisis is independent of NHEJ, and consistent with a replicative origin
Source: HighWire-hosted journal article supplement (doi:10.1101/gr.240705.118), 2019-03-14
Supplement: Supplemental_file_1.zip [file contig.2.DB53_length_819_mean_cov_14.514041514.docx]

**DB53_length_819_mean_cov_14.514041514**

AATCTCCCAGTTTGTGCTATTGATATATCAGGC|CATTCTTACTTTCTGTCTCCTCTGCCTGGAACAAGCTGCCATCATATCTTCATAG
 >chr8:77845207-77845650 + E=1e-254
AGCTGGATCCTTGTTGTTTGTTTCAACTCAAATGTCACCTCCTTAGAGAGAGGCCTTCGAGTCTATCTACTATACCATATTCTCATGCC

TACTCAATCTATATCATATTTTCCTAATTTTATGGACTTATCACTAGCAAAAATGGCTATGTTCATTAATTTGTTAATTGCTTATTGTT

TCTTCCTCCCTTGGGAATGCAAGCTCCATCAGAGCACTTACATTCTTACACTAAAATACATCTAGTGCCCAACATCCTACCTAGGTGGG

TTTTAATAAACATATATTGAATGAAATAAGAGATTTCACTTCAAAGCAAGGTTCTACTTTAAAAAAAAACTTAACACTATGGCTCCTAC

TCTGACATGCGGTTAAATATTTACTC|TTTGCA|GTTTTTACCTAACTAGAGTCAAGGATCCCACAATTCAGAGAGTTAATAGAGGCAA
 >chr8:85360563-85360912 - E=4e-198
TACTCCTTGAAGTTAGTTACTTACTGAAGAAAAAGCGTGTAGCAGTGCTTTGTTAAATGACAACAATTCTATCAAGTGAATAATCCTGT

ATGAAGGTTTTTCATCACCTCTCTTCATAAGTGGTGCACTATATGGGGGCGGGGGCAGAAATGCAATTGAGGCAAGAGAATAGGTATCT

TTTTAAAAACTAACATTATTTTTAACGAGTTATCAAATTGAAATTGTCCATGAGTTGCACATAATTTCAAACGTCTCAACAACTAAAAT

TGGAGCATGCTTAAACTCTCT
