# Supplementary material for: Chromothripsis during telomere crisis is independent of NHEJ, and consistent with a replicative origin
Source: HighWire-hosted journal article supplement (doi:10.1101/gr.240705.118), 2019-03-14
Supplement: Supplemental_file_1.zip [file contig.2.DB53_length_891_mean_cov_7.90684624018.docx]

**DB53_length_891_mean_cov_7.90684624018**

GCGGCCGCCCGGACATCAGTGAGCGGCTCATCAGCGCCTCCCTCTTCCTGCGCTTCCTCTGCCCAGCCATCATGTCGCCCTCACTCTTC
 >chr9:124528831-124529292 + E=2e-262 p=0e+00
AACCTGCTGCAGGAGTACCCTGATGACCGCACTGCCCGCACCCTCACCCTCATCGCCAAGGTCACCCAGAACCTGGCCAACTTTGCCAA

GTGAGTGCCTCCTCCCTCACCAGGCAGAGTTGGGCAGGGCTGGTGTCCACAGGGCAGGCCCTGGGGGTGGTTCTGCCCCCAAGCTGAGC

AGAGACCATAAACAGGCCCTGGTTTTGTCCCTGTCATCCTCAGTCCTTCTCCTTCCCGCTTTTTAAAAAATAAAATCTCCACACCCTGT

CCTTCTACTCAAGGTATATGTCATTTTGGTATGTTTCTTAATTTTTAAAGGTGACGACATGAGACATTTTTTTCCTTCTGCTTTTTTGA

ATTAATGTATTATTAT|TGAATTAATGTATTATTATTGAC|CCAAGAAGTCCTGGGTCAATTACTGATGTCTTAAGACTCGCGTACCTC
 >chr9:123199513-123199920 + E=7e-233
ACCCTACCTACCGTTGAGAAATAGCTTTTCCAATTTCTCCAGCAGCTCAGCACATTGATTCAGCTGTTCCTGGAAACCCTCGGCCACAC

AGTAATCCACATCACTGGCCTGCAGCAACTCCTCAAATGCCTTAATCATGGTGTTCATGTGTTGACGGGAGATGACACAGATGCCATGG

CCATCCTTAATCTGCTGCCGTTGAAGGGAGAGCTCCCTGGCTTGGGACTGAACTAATGAATCGTATCTGATAAAAGAGGGGAAAGAAAA

TACTTGGACCATTTTAGAATTGAATTTTTGTGACCTTAACACTAATTGGAAAAATGACAGAGTACAATTTTTAAAAGCCTGCAGCTGTA

CAA
