# Supplementary material for: Chromothripsis during telomere crisis is independent of NHEJ, and consistent with a replicative origin
Source: HighWire-hosted journal article supplement (doi:10.1101/gr.240705.118), 2019-03-14
Supplement: Supplemental_file_1.zip [file contig.2.DB53_length_937_mean_cov_7.57310565635.docx]

**DB53_length_937_mean_cov_7.57310565635**

CAGAGACTAGGATTGCAACCCCTGCCTTTTTTTGTTTTCCATTTGCTTGGTAGATCTTCCTCCATCCTTTTATTTTGAGCCTATGTGTG
 >chr12:87494095-87494402 - E=1e-163
TCTCTGCCCGTGAGATGGTTTCCTGAATACAGCACACTGATGGGTCTTGACTCTTTATCCAATTTGCCAGTCTGTGTCTTTTAATTGGA

GCATTTAGTGCATTTACACTTAAAGTTAATATTGTTATGTGTGAATCTGATCCTGTCATTGTGATGTTAGCTGGTTATTTTGCTCATTA

GTTGATGCAGTTTCTTCCTAGCCTCGATGGTCTTTAC|ATT|CAACATAGTGTTGGAAGTTCTGGCCAGGGCAATTAGGCAGGAGAAGG
 >chr8:84352893-84353526 - E=0e+00
AAATAAAGGGTATTCAATTAGGAAAAGAGGAAGTCAAATTGTCCCTGTTTGCAGACGACATGATTGTATATCTAGAAAACCCCATTGTC

TCAGCCCAGAATCTCCTTAAGCTGATAAGCAACTTCAGCAAAGTCTCAGGATACAAAATCAATGTACAAAAATCACAAGCATTCTTATA

CACCAACAACAGACAAACAGAGAGCCAAATCATGAGTGAACTCTCATTCACAATTGCTTCAAAGAGAATAAAATACTTAGGAAGCCATC

TTACAAGGGACGTGAAGGACCTCTTCAAGGAGAACTACAAACCACTGCTCAGTGAAATAAAAGAGGATACAAAGAAATGGAAGAACATT

CCATGCTCATGGGTAGGAAGAATCAATATCGTGAAAATGGCCATACTGCCCAAGGTAATTTACAGATTCAATGCCATCCCCATCAAGCT

ACCAATGACTTTCTTCACAGAATTGGAAAAAACTACTCTAAAGTTCATATGCAACCAAAAAGAGCCCGCATCGCCAAGTCAATCCTAAG

CCAAAAGAACAAAGCTGGAGCCATCACACTACCTGACTTCAAACTATAC
