# Supplementary material for: Chromothripsis during telomere crisis is independent of NHEJ, and consistent with a replicative origin
Source: HighWire-hosted journal article supplement (doi:10.1101/gr.240705.118), 2019-03-14
Supplement: Supplemental_file_1.zip [file contig.2.DB53_length_963_mean_cov_16.8255451713.docx]

**DB53_length_963_mean_cov_16.8255451713**

ATTAAGTATCCATGTTACAGTCCTAATCTGGATCCTTCTGACTTCTTTTTGTTTTCTGATCCTAAAACAAAAAATTTTAAGGCACCTAT
 >chr17:68549330-68549774 - E=4e-252 p=4e-02
TTTTCTTCAGCTAATATGGAAAAAACACTGCATTGACATGGTTAAATTCCAAGGACCATCGGTTTTTTATAGGTGGACTAAATGGCAGG

TATCATCACTTACAAAAGTGTCCTGAACTTGAGGAAGCTTATGTTGACAAAGCTTGTATTTTTAATTTTTATCTTTAATTCAATTTTTC

TCTGAAATTTTTATCTAAGTCCTCTTGCATATGTCATACACATATATCTATAAGACTTAATCAGAACTCTAATTTTATGGAATCTAGGT

CCTTAAAATCTGTTGCTTAAGGAACATCTAATCTTCATTGAAGTGCCCTTTTGTTCCTGGATTCCTGTTCTTTGTTAACAGTGTCAGT|

GACACT|GGATGAATGAAGAGCCCAAGAATGAACATTTATGTAGCATGCCACTACCTGCCAGTCATCAGAGCCACCCTGGTGTATAAAG
 >chr8:85467199-85467712 - E=1e-290
CAGAGGTTTCCCATATTGTCATGGAAATTACTGTCTAGATGAGGAGAGAAGTGTTAAACAAGTAATCATGTGGGAGCCAACATATATAT

ATGTGTGTGTGTGTGTGTATGTATATATTGAGATGGAGTCTCACTCTGTTGCCACGTTGGAGTGCAGTGGCATGATCTCGGCTCACTGC

AACCTCCGCCTCCCGGGTTCAAGCGATTCTCCTGCCTCAGCCTCCTGAGTAGCTGGGATTACAGGCGTGTGCCACCACGCCCGGCTAAT

TTTTGTATTTTTAGTAGAGGTGGGGTTTCACCATGTTGGTCAGGCTGGTCTTGAACGCCTGACCTCGTGATCTGCCCGCCTTAGCCTCC

CAAAGTGCTGGGATTACAGGCGTGAGCCACTGTGCCAGGCCAACATATTTTATAGCTAGGATCTAAAGTCAGCAT
