# Supplementary material for: Chromothripsis during telomere crisis is independent of NHEJ, and consistent with a replicative origin
Source: HighWire-hosted journal article supplement (doi:10.1101/gr.240705.118), 2019-03-14
Supplement: Supplemental_file_1.zip [file contig.2.DB53_length_1037_mean_cov_7.80520732883.docx]

**DB53_length_1037_mean_cov_7.80520732883**

ATTTCTTCTAGATGTTCTAGTTTATTTGCATAGAGGTGTTTATAGTATTCTCTGATGGTAGTTTGTATTTCTATGGGATCCGTGTTGAT
 >chr4:72864678-72865167 - E=4e-276
ATCCCCTTTATCATTCTTTATTGCATCTATTTGATTTTTCTCTCTTCTTTATTAGTCTTGCTAGCGGTCTATCAATTTTATTGATCTTT

TCAAACAACCTGCTCCTGGATTCATTGATTTTTTGCAGAGTTTTTTGTGTCTCTATCTCCTTCAGTTCTGCTCTGATCTTAGTTATTTC

TTGCCTTCTGCTAGCTTTTGAATTTGTTTGCTCCTGCTTCTCTAGTTCTTTTAATTGTGATGGTAGGGTGTTGATTTTAGATCTTTCCT

GCTTTCTCTTGTGGGCATTTAGTGCCATAAATTTCCCTGTACACACTGCTTTAAATGTGTCCCAGAGATTCTGGTATGTTGTGTCTTTG

TTCTCACTGGTTTCAAAGAACATCTTTATTTCTGCCTTCATT|TC|TCAGCATTTGCTTGTCTGTAAAGGATTTTATTTCTCCTTCACT
 >chr4:72863219-72863721 - E=3e-226
TATGAAGCTTAGTTTGGCTGGATATGAAATTCTGGGTTGAAAATTCTTTTCTTTAAGAATGTTGAATATTGGCCCCCACTCTGTTCTAG

CTTGTAGGGTTTCTGCCGAGAGATCTGCTGTTAGTCTGATGGGCTTCCCTTTGTGGGTAACCCGACCTTTCTCTCTGGCTGCTCTTAAC

ATTTTTTCCTTTATTTCAACCTTGGTGAATCTGAAAATTATGTGTCTTTTGGTTGTTCTTCTTGAGGAGTATCTTTGTGGTGTTCTCTG

TATTTCCTGAATTTGAATGTTGGCCTACCTTACTAGTTGGGGAAGTTCTCCTGGATAATATCCTGAAGAGTGTTTTCCAACTTGGTTCC

GTTCTCCCCATCACTTTCAGGTAATCAATCAAACATAGATTTGGTCTTTTCACATAGTCCCATATTCCTCGGAGGCTTTGTTCATTTCT

ATTTACTCTT|CTTTTCTCTCTACTTGCCTTTTGGCTTTATTTTATTATATTGATCTTCCT
