# Supplementary material for: Chromothripsis during telomere crisis is independent of NHEJ, and consistent with a replicative origin
Source: HighWire-hosted journal article supplement (doi:10.1101/gr.240705.118), 2019-03-14
Supplement: Supplemental_file_1.zip [file contig.2.DB54_length_312_mean_cov_4.80769230769.docx]

**DB54_length_312_mean_cov_4.80769230769**

CACTAAAGGGACCCTGGTATTAAGCCTCCTTAATGCAAGAAAATCATCTATCCCTGGTCTTTATTTTAGCTGTTGTTTGAAATACATGT
 >chr10:124153015-124153291 - E=2e-155
TACAAAAAAAGTATTTCTTATTTTTGGGACAGCTTCAATTGTTATTTTTTTCTGTGACTCAAGTTCTAATTTTCTAAAACCTAATTTGC

CACCAGAGAGAGTATTTCTCTCTCGAGGGAAAAATATATACAGAAGCATTAATTTTTATCAAATAAACTTAGTTTCACCTTCTGAAATT

CAAACAAAA|AAACC|GGCATGTCTTAGACAGGGGGGT|GAGGCACCC >chr10:124028901-124028923 - E
