# Supplementary material for: Chromothripsis during telomere crisis is independent of NHEJ, and consistent with a replicative origin
Source: HighWire-hosted journal article supplement (doi:10.1101/gr.240705.118), 2019-03-14
Supplement: Supplemental_file_1.zip [file contig.2.DB54_length_326_mean_cov_4.75766871166.docx]

**DB54_length_326_mean_cov_4.75766871166**

CAAAGAATTGTCCTGTTTCATCTAGATTAGCAAATTTGTGGACAAAGAGTTCTTCATAATATTTCTTTACTATCTTCTTAATGTCCATG
 >chr9:105244397-105244603 - E=9e-110 p=0e+00
GGATCAGTAGAAATATGATGTTTGTGTGTGTGTCTGACAGGAATAATTTTTGTCATCACTGGTATTTTTCTACATTAGCTTGGCTAGAG

CTTTATCGCGTTCACTGATTTTTTTTTT|TATTGTCTCGTTTTGTTTTTTTTTGCTTTTTTTGTTG|TTTTGTTTATTTTGTTTTTTTG
 >chr7:117141801-11714
ATTTTTGATTTATTTTTTTTTTTTTTTCTTTTTTTTGTTTTTTTTTTTTTTT|TTTTTTTTT1874 - E=3e-10
