# Supplementary material for: Chromothripsis during telomere crisis is independent of NHEJ, and consistent with a replicative origin
Source: HighWire-hosted journal article supplement (doi:10.1101/gr.240705.118), 2019-03-14
Supplement: Supplemental_file_1.zip [file contig.2.DB54_length_345_mean_cov_6.07826086957.docx]

**DB54_length_345_mean_cov_6.07826086957**

TCCACCTGCCTCGGTCTCCCAAAGTGGTAGGATTACAGGCGTGAGCCACCATGCCTGGGCTGGCCTGTTGTATCTTATGCTCATCGCAG
 >chr5:60950513-60950781 + E=3e-147
CCTTCCCCCTGCCCTGGTCCTCAGGCATCCCTGCAGGCTTTTGCTCAGCTAGCTGCTGAGTCATGTGGTCTGTGAAGACTGGAGAGCTG

CAGGAGAAAAGAAGCCCTGAGAGTCCTCACCTTCTCTTTCTGCTTTGGCAGCATCACCAGCTGTGGCTGGGTCTTTTTTCTGGACTCCA

G|AAAAAC|ATTCTAACACCAGTTAGAATGGCAGTCATTAAAAAGTCAGGAAACAACAGGTGCTGGAGAGGATGTGGAGA >chr6:122230457-122230528 - E=3e-28
