# Supplementary material for: Chromothripsis during telomere crisis is independent of NHEJ, and consistent with a replicative origin
Source: HighWire-hosted journal article supplement (doi:10.1101/gr.240705.118), 2019-03-14
Supplement: Supplemental_file_1.zip [file contig.2.DB54_length_361_mean_cov_9.41828254848.docx]

**DB54_length_361_mean_cov_9.41828254848**

AAGTGAA|AAAATTAAAAGGCAATATAATTTACAGAACATCTTAAATACTCGGGTATACATCTAACAAAAACTTGTATAGTGTCTGTTT
 >chr7:1861828-1862079 + E=8e-137 p=0e+00
GCAGAAAGTTAGGAAATACTGATGAAAGGAATCGAAAGGAATCAAAAGAATGTTTGTATAAATAGATACAATGTTTATGAACTGGAAGA

CTTATAGTAAATCAATTTTTCCAAAATTGATCTTTGGTTTTAAGGTAATTGCTGTCCAAACCTCAGCATATATAT|ATATAT|ATATAT
 >chr9:17352
ATATATATATATATATATTTTTTTTTTTTTGTATG|AGGGTTTTTTTTTGTGTCTCTTGTTTTGGTGTAGGTGTGTGGTTTTTGGTTTC
387-17352434 + E=8e-11
TTTATACTC
