# Supplementary material for: Chromothripsis during telomere crisis is independent of NHEJ, and consistent with a replicative origin
Source: HighWire-hosted journal article supplement (doi:10.1101/gr.240705.118), 2019-03-14
Supplement: Supplemental_file_1.zip [file contig.2.DB54_length_380_mean_cov_13.9105263158.docx]

**DB54_length_380_mean_cov_13.9105263158**

GGCGGGAAGATAAGGAGGAAAAAAAAACAAAACAAACCTGG|AAAAAAAAATAAAACCCAACATAAAAAAAAAAAA|AAAAAAAA|AAA
 >chr9:27922106-27922148 + E=9e-05 p=0e+00 >c
AAAAAAAAATTAGCCAGGTGTGGTGGCGGGCACCTGTAGTTCCAGCTACTAGGGAGGCTGAGGCAGGAGAATGGCGTGAACCTGGGAGG
hr1:193314567-193314847 + E=2e-152
CGGAGCTTGCAGTGAGCCGAGATGGCGCCACTGCACTCCAGCCTGGGCGACAGAGCGAGACTCCGTCTCAAAAAAAAAAAAAAATCCTG

TGCTAAAAAGATGTGTCACATTACAGTTTTATAGGAGCAGCTTTAGTACTGGGAATTGGAATAGGAGCTGTTTCAATACATTCTAATTT

A|TTTTTGGTTTTGGGGGGGAAATTGTG
