# Supplementary material for: Chromothripsis during telomere crisis is independent of NHEJ, and consistent with a replicative origin
Source: HighWire-hosted journal article supplement (doi:10.1101/gr.240705.118), 2019-03-14
Supplement: Supplemental_file_1.zip [file contig.2.DB54_length_424_mean_cov_6.72169811321.docx]

**DB54_length_424_mean_cov_6.72169811321**

TCTGCAGTTGCCTGAAGGGCTTTCTAAAATCCACCAGTTTTTGTTCCTACAGTTCCAGATGTGTTTTAGACAAAACCTTTCCCATTCTT
 >chr18:59652052-59652165 + E=2e-56
CCCAGTCATGATGGAAAGAGTCA|G|TTTAAGTATTCCTACACAGCCCTCAGGAGGGGAGAAGGATGATGGGGGAGGTGGATGGAAATC
 >chr6:8136634-8136946 - E=2e-173
AAGTTATTTATTTAAGGATTATGATCTGAAATCCATGTTTAGAATATATATATTTTTTACCTCAAAGCACTGATCCCAGTTAAAATGCA

AACATTTCAGAAGGGTTGCACTTCAAGACTTTTATTAGTCATTTACCACTTAGTATAAGCTAGCTCCCAAAAGCAAAATTTGAAAACAC

AAATGGGCCTGACACAGTGGCTCGTGCTTGTAATGCCAGCACTTTGGGAGGCTGAGGCAGGCAGATCACT
