# Supplementary material for: Chromothripsis during telomere crisis is independent of NHEJ, and consistent with a replicative origin
Source: HighWire-hosted journal article supplement (doi:10.1101/gr.240705.118), 2019-03-14
Supplement: Supplemental_file_1.zip [file contig.2.DB54_length_448_mean_cov_6.9375.docx]

**DB54_length_448_mean_cov_6.9375**

AGGAGTTGGTGCCACGCAGAAAGGGGCTGACCGCATGGTTGAAGAGTCTTAGCTGAGAGGTATGTTTATATTCTTGTCAAAGGAAATTT
 >chr4:2911885-2912013 + E=2e-65
CCAGAACTGTCTCTTTCACTTGTCACACCTTCATTGAGA|CCTTGTCTCAAAAATAAAT|AAATAAATAAATAAATAAATAAATAAAAT
 >chr4:2697756-2698057 + E=9e
ACATTAATCAGGATTTGTAATTGTTTCCTTTTCAGTTTAAAAAATCCACTTATGTGCATAGCTATACATGCTTTATCAGGTTTTTCATG
-170
AATATGTAAAATTTGAGAGTAGGTATCAAAATGCCACTTTTGGGTGACTTGCTGATAGGTTTTTCTCTTTTTCTGCTGGTTGTTGTATT

TCCTTATTTTTCACAACAAATATATACTACTTGAGTAATAAAACAGTTTATTTTTGGAGGTGTGGTCTGAAATTTATTATATTCAAAAT

TTTTA
