# Supplementary material for: Chromothripsis during telomere crisis is independent of NHEJ, and consistent with a replicative origin
Source: HighWire-hosted journal article supplement (doi:10.1101/gr.240705.118), 2019-03-14
Supplement: Supplemental_file_1.zip [file contig.2.DB54_length_535_mean_cov_8.69158878505.docx]

**DB54_length_535_mean_cov_8.69158878505**

TCTGTCCACACGTGGCACCTATGTGCTGTGAGAGATACAAGCACTCTTTGTGTAAGCAAAAGCATAGCATTGCTTGAGTTTTATTATAG
 >chr6:155406955-155407173 + E=1e-119
ATATAGTTTACCTAGCACCACCTTGGATCTCATAGACTCACATACTCAAGGTGCCCTGTTTGATCTTTCTGTGGTCACAAGATATTGCA

GTCCCGGCCCACTGCAAATTCTCCCTTAAAATGGGACTTT|ATTATGGGGGCGGTTTCCCCCATGCTGTTCTCATGATAGTGAGTTCTC
 >chr6:155515983-155516300 + E=3e-179
ATTAGATCTGATCATTTTATAAGGGGCTTCCCCCTTTGCTGGGCACTGATTCTTCTTGCTGCCACCATGTGAAGAAAGACATGTTTGCG

TCCCCTTCCACCATGATTGTAAGTTTCCTGAGGCCTCCGCAGCCCTGCGGAACTGTGAGTCAATGAAACCTCTTTATTTTATCTATTAC

CCAGTCTCAGGTATGTCTTTATTAGCAGTGTGAGAATGGATTAATACAAACATTAACTTTATTTTTCAACAAGATTCTAAGGCTTAAGG

TG
