# Supplementary material for: Chromothripsis during telomere crisis is independent of NHEJ, and consistent with a replicative origin
Source: HighWire-hosted journal article supplement (doi:10.1101/gr.240705.118), 2019-03-14
Supplement: Supplemental_file_1.zip [file contig.2.DB54_length_538_mean_cov_11.5092936803.docx]

**DB54_length_538_mean_cov_11.5092936803**

ATTCTCCTGCCTCAGCCTCCCAAGTAGCTGGGACTACAGGCACCCACCACCACGCCCAGCTAAATTTTTTGTATTTTTAGTATAGACGG
 >chr20:34305884-34306072 + E=2e-101 p=0e+00
GGTTTCACCGAGTTTGCCAGGATGGTCTTGATCTCCTGACCTCGTGATCCACCCGCCTCGGCCTCCCAAA|GTGCTGGGATTACAGGCA
 >chr19:44021238-4
TGAGCCACTGC|ACCAAGACAAAAGTGATACACTTTCAATAGAAATCATATTCCATGCACCCATACAGCCATTCTGTTTTTCACTTTCA
4021565 + E=3e-179
ATTCAGTATTCAATAAATTACATGAGATATTCAACACTCTTGTATAAAATACAAGGCTTTGTGTTAGATGAGTTTGCCCAACTGTAGGC

TAATGTAAATGTTCTGACCACTTTAAGGTAAAGTAGGCTAACCTATAATGTTCAGTAGGTTAAATGTATTAAATGCGGCCAGGCACGGT

GGCTCACGCCTGTAATCCCAGCACTTTGGGAGGCTGAGGCAGG|CGGATCACAAGGTCAGGAGTTCGAGACCAGTCTGGCCAACATAGT

GAAACAC
