# Supplementary material for: Chromothripsis during telomere crisis is independent of NHEJ, and consistent with a replicative origin
Source: HighWire-hosted journal article supplement (doi:10.1101/gr.240705.118), 2019-03-14
Supplement: Supplemental_file_1.zip [file contig.2.DB54_length_661_mean_cov_7.0015128593.docx]

**DB54_length_661_mean_cov_7.0015128593**

GCATTCTTCTTTTCTCAAAAGTGAACAAAAGAAAATTTCAGAAAATATAAAAATTCACTTAAGAAATGAATGGTTTACATTTGAAACCA
 >chr11:114812150-114812486 - E=2e-190
AATAAAGTTTGTCATGTGTTGAGTATCATTCTTGAGTGTGAAAAAAGGATACATTTGACCTAGATTGTAGGAACGTTGTCTATTGAGTG

GTGAAAGAATCATGATGTTGGCTTTATTGAGAAAGAAACATAATTCTAACTCATTTCTTATCTATGCAGTAAAACATATTTCTATAGAA

ATATTAATGAAAATATTAGTAACAATGGCCTAGGTTATGCTGAACTAACAAACCCAGCTCTCTTAATT|G|CACCATGCAGCCACTGCT
 >chr11:114769174-1
AGGGGATGGGGGAGGAGTGGAATCAGGGATTCAAGATTTTTTTTCTATCCTCTTCAGTGCCTGTTTTAGCTATATGAAGTTAAAACCAG
14769500 - E=2e-178
GTGCTGTGTGTGGTCACCTCATTTTTGGTTCTTATAAAGATTTTTGTTTGTTTGTTTTATTGTTTTTGGTATAGACAGTTGTTAAAGCA

CTGTCCTTAGAGCAGGGCCTGGGAAGATTGGTGGAGCCTTCTATTTGGCTATTTTGCTCCACCCCCCGTGTCAATGCAGTGACTTTTGA

AGATAACTGTCCTACTCTGCCCTCTAACATATGCCATTTG
