# Supplementary material for: Chromothripsis during telomere crisis is independent of NHEJ, and consistent with a replicative origin
Source: HighWire-hosted journal article supplement (doi:10.1101/gr.240705.118), 2019-03-14
Supplement: Supplemental_file_1.zip [file contig.2.DB54_length_696_mean_cov_13.4454022989.docx]

**DB54_length_696_mean_cov_13.4454022989**

GGCCTGGGAAGAGGCAGGTGTGATGTGTGGGATTGAGACATGTCCAGGCACAGGAACCAATGAAAGAACTGTACAACATTTACTTTTTC
 >chr16:369647-370067 - E=6e-241
AGAGGGAGGAAATGGAAAGCAAAAAATACCCCAAAGAAGGCAAGAAAGAGCAAAAGGAAGTAGAGCAGATGTGATAAACCAACCCGATC

CGACGGTGGCCCAGCTCCCTCCACATCACACTAAATGTAACCGGACCAGACAGCCTCATTAAAAGGAAAAATTGTTATGCTACCTTTTT

AAAAGGCAGGCTGCTTACACAAGTAGAAGAATATAGAATGGTTAAATGTGAAAAGACGGAAGATGAAAGTACCACAGTGACCAGAGAGC

CGGTGCCGTGGCCATGCTGGATGTGGGAGCAGCCGCGGGAGTCCCAGAGAGGTGCCTTCCTGGG|TTAGCTGGGCACGGAGGCATGTGC
 >chr16:496590-496867 -
CTGTAATCCCAGCTACTCGGGAGGCTGAGGCAGGAGAATTGCGTGAACCAGGACTAGGAGGCGGAGGTTGCAGTGAGCTGAGATCACGC
 E=5e-150
CACTGCACTCCAGCCTGGGCGACAGAGCGAGAGTGCGTCTCAAAAAAAAACAAAAAAGTTTGAGATATATGAATAAAAAGGACTATATG

GAAATAAGTCCTCACACTGAAGTGTGCTTGGAAAACAGGTCAACATGTCTCTGTAGGACACATCTGGACACCAG
