# Supplementary material for: Chromothripsis during telomere crisis is independent of NHEJ, and consistent with a replicative origin
Source: HighWire-hosted journal article supplement (doi:10.1101/gr.240705.118), 2019-03-14
Supplement: Supplemental_file_1.zip [file contig.2.DB54_length_699_mean_cov_7.29613733906.docx]

**DB54_length_699_mean_cov_7.29613733906**

GTTCTCAGCCCTGCTGGCAGCCCTGGGCTATGAGCTGCAGGGGTACTGTCTGTCCTGGGCCCTAAATCTGTCCCAACTGCCTTGTGAGA
 >chr19:17974329-17974708 + E=3e-213
CACAGGCCTCCCAGGCTCCCCTGCTGAGTCTGGACCAGGGAGAATCTCCCTAGATAGTGGGGTTGGCGTTCACTCCCTGGGGAGTCTCC

TAAGTCTCTGGTTCCCAAAGTTTTCAGAGTAGACACAAGTGGGCACCCGAGGGGCGCTCTCTGCTGCTTGGGGGCTGTTTCCCTTTCAC

TGGTTGGGGGCCTCTTAGATGACGCCCTCATCTTGCCCAAGGAGGTCAAGGACTCACCACAGGTACTCATCTCTGGGAAACTGCCTCAG

GCCTGGAAAATTCCAGGCATG|AC|GCTGGCCTGTGTGTGCGCCCTGCTGGTGTGGCACCCCGCCGGCCCCGGCGAGAAGGTGGTGCGC
 >chr19:17837414-17837736 + E=6e-176
GTGCTGTTCCCCGGTTGCACCCCGCCCGCCTGCCTCCTGGACGGCCTGGTCCGCCTGCAGCACTTGAGGTTCCTGCGAGAGCCCGTGGT

GACGCCCCAGGACCTGGAGGGGCCGGGGCGAGCCGAGAGCAAAGAGAGCGTGGGCTCCCGGGACAGCGCGAAGAGAGAGGGCCTCCTGG

CCACCCACCCTAGACCTGGCCAGGAGCGCCCTGGGGTGGCCCGCAAGGAGCCAGCACGGGCTGAGGCCCCACGCAAGA
