# Supplementary material for: Chromothripsis during telomere crisis is independent of NHEJ, and consistent with a replicative origin
Source: HighWire-hosted journal article supplement (doi:10.1101/gr.240705.118), 2019-03-14
Supplement: Supplemental_file_1.zip [file contig.2.DB54_length_904_mean_cov_11.5077433628.docx]

**DB54_length_904_mean_cov_11.5077433628**

CTGGGA|TAAGAGGCATGTGCCACCATGCCCAGCTGTTTTTTGTATTTTTAGTAGAGACGGGGTTTCACCATGTTGGCCAGGCTGGTCT
 >chr7:5512726-5513273 - E=4e-302
CGAACTCCTGACCTCAGGTGATCCACCCACCTTGGCCTCCCAAAGTGCTGGGATTACAGGCATGAGCCACCGCACCCGGCACGTGTGCT

CTTGAGGCTGGTGTATTTGCAGTGTCAGTTTGGGGCAGAGACCTCCTTTACCTGTCCTGGGCTCTGGGAAGAGGCTCGGCCCAAATGTG

GCAGGCGGGGGGAGGAGGCACCAGGATCCGGATGGGGACAGGGCTGCCGGCAGAGGGTGGGCTCCAGGGCTGCTGCAGAACGGAGCGGC

CAGGGTGGGGCCCCTCACATGAGCCAGGGACTCAGCAATGCCTCCTTCTGGCTTGGTTCTTGAGGTGATGGTGTTTCTCTGGCAGAAAT

GGCGACATAGGGCCAGGAGCCTCCCATCCTGCCCAACATTGTCTGAGCCGTTGCCTGCAGCTTGACATGTACACACCGTCCCCTGGTGA

TGTCTTGTGTCTGGCTGGA|G|AGTCTGGAGAACCGTGGCCTGGCTCCCTCGACCCGCATCTCACCTGGGACCCCAGAGATGCCCCCGG
 >chr7:5647568-5647920 - E=8e-200
CCCCTGGCCTGGCTTCCCCCCAGAGGGCAGGGCCTGGGCAGGTCCCTCGCCCCGGGTTATTCCCCCGTCCCTTTCAGTTGGGCAGCTCC

TACCGATTCCTCCCGAGAGATCTCGTGAACGGCCCTTCCAGCCTCCCCCATCGGACTATGCTGCTCATTGGCTGCAGCCTCGGGAATCT

CGGCCACGTGGTAGGCGCCAAATTTTGCAGAATGAATGGAATTCGGAATCAGCTGGTGGCTCCGGGGACCTTAGGGTCATTCTAGGTCA

GCTCCATGGGTGGAAAT
