# Supplementary material for: Chromothripsis during telomere crisis is independent of NHEJ, and consistent with a replicative origin
Source: HighWire-hosted journal article supplement (doi:10.1101/gr.240705.118), 2019-03-14
Supplement: Supplemental_file_1.zip [file contig.2.DB54_length_930_mean_cov_11.7376344086.docx]

**DB54_length_930_mean_cov_11.7376344086**

GGGGGCGCACGGGGCGCCGCGGACGCGCCCCCCCCCAAGTGTCCCCGCCCCCGGGGGCGGCGGGGGGGGGGGGGGG|GGGGGAGAGAAG
 >chr19:5105
GGGGAGAGGCTTGGTGAGGGACAGGAGCCCATGTGGCCCGGGTGCTTGCCAACACCCAGGCAGCCCCATCGCCGCCTCCCTGCCCCATG
2138-51052606 + E=1e-266 p=2e-02
CCCAGAACAAAGGGACAGGGAGGGAGACAGCTGCCGATGGACCCACCCAGCAGGCTGGGGCAGGCAGAGGGAAGCTTGGCCCGCCTGGC

CCTGCACTAGCTCATCCTCTCCATGCTGGCAAGATTCTACGCCCATTCTGCAGCAGGGAAAACTGAGGCTGGGGGAGAGGAAGTGCCTG

CCCAAGGTCACTCATCCAGTAAGTGCAGAAGTTGTCCAGATTCAAAACCCAGTTCTTTGCATGACTTCAAAAAGGTAGATACATCAGAG

GAGTGAGACAGACAGACAGACAGACAAGGCGAGGGGGCAGAAACGGGGAAGAGCAAGCGAGGTGGCGAGGACCTCGCTCCCATCCCAAC

ACCCGC|CCGGT|TACTACTAATTGTGTTCGGCAGCACTGGTAGCCAGGGGAAGGCGGGGCTAGATACGATAGAGAGAGACCTTACTGA
 >chr19:50832629-50833020 + E=3e-223
ACTGAAAAAAGTGCGGGCGGGGTAGAGGGAGGAGGGGACACATCCAAGCTATTTAAAGACGCCCGACTGGCCTGGAGGGGCGGGGCCAC

CATGAGAGAGGCCGTCCTGATTGGGCTGAGAAAGGGGCGGAGAGAAACAAAACAGATCGCACGCCCTCACCTAAAACACCGCTAGGCAG

GACCTGGTGGGGAGGAGCATTGCTTGGAAGAGACAGGGCCGCAGAAAGTAGAAACGGTCCAGATGAGACTGCATGGGGCGGGAACTAGA

GATGGAGGACTTTCCCGCGCAAGGGGGACAGGCTGGACTGAAA
