# Supplementary material for: Chromothripsis during telomere crisis is independent of NHEJ, and consistent with a replicative origin
Source: HighWire-hosted journal article supplement (doi:10.1101/gr.240705.118), 2019-03-14
Supplement: Supplemental_file_1.zip [file contig.2.DB55_length_264_mean_cov_2.27272727273.docx]

**DB55_length_264_mean_cov_2.27272727273**

CTGGACAACATGACAAAACCCTGTATTCACACACAAAAATACATTAGCTGGGTGTGGTGGTGTGCACCTGTAGTCCTAGATATTCGGGA
 >chr9:17020744-17020898 - E=1e-78
GACTGAGGTGGAAGGATCACTTGAGCCAGGGAGGTCAAGGCTGCAGTGAGCTATCATTGCGC|TAC|CTAGGTGATAGATTGATAGGTG
 >chr9:17281278-17281391
CTGCAAACCACCATGGCACATATTTACCTACATAACAAACCTGCACATCCTGCACGTGTATCCTGGAACTTGAAACAAAATTAATTTT- E=8e-57
