# Supplementary material for: Chromothripsis during telomere crisis is independent of NHEJ, and consistent with a replicative origin
Source: HighWire-hosted journal article supplement (doi:10.1101/gr.240705.118), 2019-03-14
Supplement: Supplemental_file_1.zip [file contig.2.DB55_length_265_mean_cov_5.50188679245.docx]

**DB55_length_265_mean_cov_5.50188679245**

GGGAAGGCTGAGGCAGGAGAATCACTTGAACCTGGGAGGCGGAG|GG|AGCCTTAGGCAGCGGTAGGAGGTGACTTCCCACTCTGAGCA
 >chrUn_gl000220:121887-121933 - E=2e-16 >chr19:18909182-18909358 - E=5e-90
TCCAGTGACCAAATTGAGGAGACAGGACAGACTTGCTGAGCCTCAGTTTGCCAACCTGTAAAATGGGGATGTTAATAGCTGACATTGAT

TGAGGGCTCAGCTCTTTCTTTTCCTTTTTTTTTTTCTTTTTTT|GGTGCAGGGTTTTACTTGGGGTTACTCTGTGCGCCCAGGGTGGGG

T
