# Supplementary material for: Chromothripsis during telomere crisis is independent of NHEJ, and consistent with a replicative origin
Source: HighWire-hosted journal article supplement (doi:10.1101/gr.240705.118), 2019-03-14
Supplement: Supplemental_file_1.zip [file contig.2.DB55_length_265_mean_cov_6.62641509434.docx]

**DB55_length_265_mean_cov_6.62641509434**

TCTGTTGTCCAATCCTTCTTTAGTTTCTATACAGCACACATTCCTGATTGAAACCTTGCTCACTTATTTGGGGACGATATTGGGTTGAG
 >chr11:94765292-94765445 - E=6e-81
TGAATGAGTTATCAGTGTGAAAGCTACACACAGCTTTGAAAAGGCAGTGGAGCCCGGGGAG|AGA|TGCCTGAGAGTTCTGGGGAGTAA
 >chr11:94758559-94758674
TTTCTTTTCTCCCCTTTGTTTTTCAAAATACTTTGGTTTATCTGTTAGATAGTAATTCACACTTGGACTTTTGAACAAGTGAGATCTTT- E=6e-52
