# Supplementary material for: Chromothripsis during telomere crisis is independent of NHEJ, and consistent with a replicative origin
Source: HighWire-hosted journal article supplement (doi:10.1101/gr.240705.118), 2019-03-14
Supplement: Supplemental_file_1.zip [file contig.2.DB55_length_285_mean_cov_5.26315789474.docx]

**DB55_length_285_mean_cov_5.26315789474**

TAAGGCATATATATATGCATATATATATATATATACTATATATATAAAATACAAAAACAAATGTTATATATATAACAATATAAAATACA
 >chr13:72127701-72127819 - E=9e-60
AAAATATAAAAATACAAAATGCAAAAACA|TTCCCTCATTCTAAATATAGTGGAATAGGCTGTAATAATTGACATTTGTGGTATATAAA
 >chr13:72126652-72126819 - E=3e-83
TAGGCTCACTGTTTCTTGATGCTAGAGCTCTCTGTTTATCCTCCACACATTTGTCCACCGACGCTAGTTTACCGTGTTGCTCTCTCATG

CATAATTTGTTTTGGTTTT
