# Supplementary material for: Chromothripsis during telomere crisis is independent of NHEJ, and consistent with a replicative origin
Source: HighWire-hosted journal article supplement (doi:10.1101/gr.240705.118), 2019-03-14
Supplement: Supplemental_file_1.zip [file contig.2.DB55_length_293_mean_cov_25.9180887372.docx]

**DB55_length_293_mean_cov_25.9180887372**

TGCCGTCTCAGCTTCCCAAGTAGCTGGGACTACAGGCATGTGCCAAAAAA|TT|TTGAGCGCCGACTGTGTGCAGGGATTGGTTGAGCG
 >chrX:2756026-2756076 + E=1e-18 >chr16:1142913-1143137 - E=4e-94
CCGACTGTGTGCAGGGATTGGTTGAGCGCCGACTGTGTGCAGTGATTGGTTGAGCGCCGACTGTGTGCTGTGATTGGTTGAGCGCTGTG

TGCACGGATTGGTTGAGCGCCGACTGTGTGCAGGGATTGGTTGAGCGCCGACTGTGTGCTGTGATTGGTTGAGCGCCGACTGTGTGCAG

TGATTTG|CATCTGAAATAAATCAAATAT
