# Supplementary material for: Chromothripsis during telomere crisis is independent of NHEJ, and consistent with a replicative origin
Source: HighWire-hosted journal article supplement (doi:10.1101/gr.240705.118), 2019-03-14
Supplement: Supplemental_file_1.zip [file contig.2.DB55_length_319_mean_cov_6.11285266458.docx]

**DB55_length_319_mean_cov_6.11285266458**

GAGCTTGCAGTGAGCCGAGATCGCGCCACTGCACTCCAGCCTGGGCAACAGAGTGAGATTCCGTCTCAAAAAAAAAGAAGAAGAAAAAA
 >chr6:162885793-162886024 + E=4e-123
AGAAAAAGAAAGAAATTTGTGTATAAATACAAGTTTTAAGAGCCCCCCCTCCTCCTTCTTAATAAATATTAATGCATTTGCTCCTCCAC

TAAAAACACTTTAAGAAAATCAACAGCCATGGCGATCTCATGGCTGTGATG|T|CAAAGATCCCATTAATGTTTATTACAACCCCAATA
 >chr6:162961420-162961501 + E=2e-34
ATATAGGTAGGCAGAATAGAATCCTGAAAAAGGTGCCAAAAGTTG|TAAAGCTGT
