# Supplementary material for: Chromothripsis during telomere crisis is independent of NHEJ, and consistent with a replicative origin
Source: HighWire-hosted journal article supplement (doi:10.1101/gr.240705.118), 2019-03-14
Supplement: Supplemental_file_1.zip [file contig.2.DB55_length_362_mean_cov_4.45303867403.docx]

**DB55_length_362_mean_cov_4.45303867403**

ATATATTTTAATTTTTATTCCTGTTAAGCTGGGACCATTCAAAAAAGTCAACAGAAAACAGCCTAGCCTAGAAAACAGCCAGCTGTTTT
 >chrX:12771345-12771552 + E=2e-108
CCAAACTGGCTAAAACCATAAACACCTGGAAAATTATTTCTAAAAACAAAGCCAAAAAAAAATCCACAGGCCTAAGCTTTTCACTTCAG

CAAGGTTTTGGACCCACTGGTTTA|ATCC|CCAATTTACAGAAGAGAAAACTGAGGCACAGACAATTAAGAAGGTGCCCAAGTTTGTGC
 >chrX:12719530-12719690 + E=7e-85
CCCTAATGAAGTGGAGAAACAAGTTTCAAGCCTAAGATTCCAATTCCGGCAGCCTAACTCCAGAAGCCACATTATGCTATCAATGCTGT

GTGCATTC
