# Supplementary material for: Chromothripsis during telomere crisis is independent of NHEJ, and consistent with a replicative origin
Source: HighWire-hosted journal article supplement (doi:10.1101/gr.240705.118), 2019-03-14
Supplement: Supplemental_file_1.zip [file contig.2.DB55_length_366_mean_cov_3.10655737705.docx]

**DB55_length_366_mean_cov_3.10655737705**

GTCTCAAACTTCTGACCTCTGGTGCTCCGCCCGCTTCGGCCTCCTAAAGTTCTGGGATTACAGGTGTTAACCACCATA|CCTG|GCTAT
 >chr6:163886876-163886958 - E=7e-26 >chr7:14
ATTCATTTTTATATGTATATAAAAATATATGTATATATATGTGTATATATGTATATATATGTGTATGTGTGTTTGTGTGTGTGTAATAT
4830876-144831164 + E=3e-162
ATAAACATATGCTCACAGCAATACCTGCAATCTCAACTCAACACCATAGGATTTATTTGAGTTTTTTCTCTTTTCATTTATGTATATAC

TGCTGATATGGTTTGGCTGTGTCCGCAGCCAAATCTCATCTTGAATTGTAGCTCCCATAATTCCTACGTGTTGTGGGAGGGACCTGGTA

GGAGATAATTGA
