# Supplementary material for: Chromothripsis during telomere crisis is independent of NHEJ, and consistent with a replicative origin
Source: HighWire-hosted journal article supplement (doi:10.1101/gr.240705.118), 2019-03-14
Supplement: Supplemental_file_1.zip [file contig.2.DB55_length_369_mean_cov_7.70731707317.docx]

**DB55_length_369_mean_cov_7.70731707317**

CATCTCTGACGTCTGTTGCCCACTCCTCCCCATCCCCTGCCTCCTCCATTCATTCATTCAACACAGATTTACTGTGTCCTGTGACGCAG
 >chr7:6870385-6870707 - E=7e-180
GCACTGTGTTAGACAACAGGAACCAGAAGATGGCCCCAACAGAGTCCTGGCCTCAAGAAGTTCACTTTCCTTGATAGGAAGGAGGGCAT

GGTGGCCCGTGCCTGTAGGACCAGCTATATAGGAGGCAGAGGCAGGAGGATCGCTTGAGCCCAGGAGTTAGGGGCTGCAGTGAGCTATG

ACCATACCACTGCACTATAAACTGGGCAACAGAGCAAGACTGTCTCAAACCTA|TA|ACGTGGGCTGTGATCGCACACTTCCACTCCAG
 >chrUn_gl000220:120777-120826 + E
CTTACGTGGGCTGCG=5e-18
