# Supplementary material for: Chromothripsis during telomere crisis is independent of NHEJ, and consistent with a replicative origin
Source: HighWire-hosted journal article supplement (doi:10.1101/gr.240705.118), 2019-03-14
Supplement: Supplemental_file_1.zip [file contig.2.DB55_length_398_mean_cov_3.20603015075.docx]

**DB55_length_398_mean_cov_3.20603015075**

CCGATATGCCTTAGAATGGTTTGATTTTTCTTCTAGCCTTTATTGCAGGTTCCCCTGCATCTAGGCTGGAGTGCAGTGGTGCAATCTTG
 >chr19:18582279-18582514 - E=5e-124
GCTCACTGCAACTTCGGCCTCCTGGATTCAAGTAATTCTCCTGCCTAAGCCTCCCAAGTAGCTGAGATTACAGACGCCTGCCACCATGC

CTGGCTAATTTTTGTACTTTTAGTAGAGATAGGGGGTCACCATGTTGGCCAGGCT|GG|CCCCCAAGCCAAGGGTGACCCATCGAACTA
 >chr19:18786483-18786648 - E=8e
TTGGCCGCGGTTCCCACCTATTCCTGCATCCCTGCCCTCTACAGTTCTTCCTTCCAGGTGGAAGACACTTCCCCATTCCAGATGTGGGG
-85
CTCAGCCATGTCATTTGCTTGGCCGAAGACTTATGGGCAGGTCA
