# Supplementary material for: Chromothripsis during telomere crisis is independent of NHEJ, and consistent with a replicative origin
Source: HighWire-hosted journal article supplement (doi:10.1101/gr.240705.118), 2019-03-14
Supplement: Supplemental_file_1.zip [file contig.2.DB55_length_431_mean_cov_5.12993039443.docx]

**DB55_length_431_mean_cov_5.12993039443**

CAGCGGACTCGGGCGCGCCTTTGTCTGAGCTGCGGTGCGCCGGGAGTCCTGCGCCTTTGTGTGACCCTCGCAGGTGTGCGAGCGGAGGT
 >chr19:42637366-42637582 - E=2e-118
GTTGGGAGGGTGTTGGGGAGGGGAGCGGAGGGAGGGGCTCCCTTCTCCGCAGCCGGCCCCGCCCTCCGGCCCATTGGCTGGGCGCTGCC

GCCCTCTGGCGGGCACGGAGGGAAGCGCTGAAATG|GGA|CCTGTGCAGCGTGTGCATAATAGACACAGAACTACCTACGACTCCCTGT
 >chr19:42683951-42684169 + E=1e-116
ACGGAGCAGCCTCCTGGGACCCGCACTGTGTGCGCAACACAAATAAATGCAAGGAATACTACCCTCTGTCCATACAAAGTAGGTATTTG

GGTCTTATGCAGCAGATGCATAATGGACATGGGACCACTTAATACCCCCATACAGAGCAGACTCCTGGGATCCACAC
