# Supplementary material for: Chromothripsis during telomere crisis is independent of NHEJ, and consistent with a replicative origin
Source: HighWire-hosted journal article supplement (doi:10.1101/gr.240705.118), 2019-03-14
Supplement: Supplemental_file_1.zip [file contig.2.DB55_length_469_mean_cov_4.51172707889.docx]

**DB55_length_469_mean_cov_4.51172707889**

GCAGTGAGTACGAAATACTATGAAAAAATAGTTTTCTCTTAATATCTCCTAGTATTCTATCAATCATGTAAGCTATCT|ACTACCAATT
 >chrX:325
CCTTATGCCATTTTCCAACTCTGATAGTATATTTTAAAAGCCAGGTTTTTGTGTGAAAAAGCAAGTTTAAAAAAGTAAAGAGGAAATAA
00956-32501280 + E=1e-177
AAGTCAGTATGGATGCCTAGGCACTTCTGTTAGCTCTTATTTCCTGCATACTTAATACGTCCAAAGTACTGTGGAGGAATACAAGAAAT

GAGATTTACTCCCTGGTGCCAGTTCGGATATAATGCATACACATGTGCAATTATTTGAATTAATTTCAAATTAACAAAATCAACTGCTA

TGTAATTTCATATGCTACATTTTTCATTCTATATATATATATATA|TA|CATTAATTCTGGAAATGATATTATATGGTGAATTCTTTAA
 >chrX:32502043-32502112 + E=6e-30
ATATTTACAAAGAAAAGCAATAGGATA
