# Supplementary material for: Chromothripsis during telomere crisis is independent of NHEJ, and consistent with a replicative origin
Source: HighWire-hosted journal article supplement (doi:10.1101/gr.240705.118), 2019-03-14
Supplement: Supplemental_file_1.zip [file contig.2.DB55_length_481_mean_cov_8.13513513514.docx]

**DB55_length_481_mean_cov_8.13513513514**

GGTCCCCTGGAGGTGGGACCCTCCTGGGTGACTCTGGGCACTGCCATCCAACCCCACATGCCCCACCTGGCTGCTTCGCTCACACCCCC
 >chr9:133862263-133862570 - E=3e-173
CAGTCTCCCACTTCCACGCACAAGAATCTTTCCTTTCCTTTGGCTACAAACTGGGGGAGGGGAGGACGACCCAATTTATTTGGCAACAA

ATAAAGAGCTGCCATGATTAAGATGGGGGGGAAGTTTAAAGGAGGAAAAATACCTTGGGTAATGCCATCTCCTGCGTCTTTATATTCTG

AAACGGATCGTTCTGGACATGGGCAGAAGGCCTGATTTAA|GTGTAGCCA|GGATTACAGGCGTGAGCCACAACACCCAGCTAATTTTT
 >chr2:202862964-202863129 - E=9e-41
GTATTTTTAGTAGAAACGGGGTTTCACCATGTTGACCAGGCTGGTCTCGAACTCCTGACCTCAGGTGATCACCTGCCTCAGCCTCCCTG

AGTGCTGGGCTTACGGACATGAGCCACCACGCCCAGC|C
