# Supplementary material for: Chromothripsis during telomere crisis is independent of NHEJ, and consistent with a replicative origin
Source: HighWire-hosted journal article supplement (doi:10.1101/gr.240705.118), 2019-03-14
Supplement: Supplemental_file_1.zip [file contig.2.DB55_length_554_mean_cov_10.5920577617.docx]

**DB55_length_554_mean_cov_10.5920577617**

ACAATTTACAGTTTACACATTTATGAACCCAGAGGAAATGCTCCAGCATACGGAATGTACAATTGTTACCGTTTACATTTAAATTTTTC
 >chr7:147187218-147187513 - E=7e-166
TCTAACATTGGCTAGAAAAAATTTTACTTTTGCTTTATTTGGCAATGTCAGGACCTGTTCCTTACTAGTATTTCAGAATTTTTAAATCT

CGTGATTTTAAAATTAAAAGAGAATTATATAGGTCATCTAGTTTATTCCTCCTGTTTCCCCTGGAAACATTACGTCTATATATTTGGGC

AACATGAAAATCTCTCCTTTAATAAAAA|AGCACTTTGGAAGGCCGAGGCGGGCGGATCACCTGAGGTCAGGAGTTCGAGACCAGCCTG
 >chr7:146900332-146900591 - E=3e-138
GCCAACATGGTGAAACACTATCTCTACTAAAAATACAAAAATTAGCTGGGCATGGTGGTGGGTACCTGTAATCCCAGCTACTGGGGAGA

ATTGCTTGAACCTGGGAGGCCGAGTTTGCAGTGAGCCAAGATCACACCATTGCACTCCAGCCAGGGCAACAGAGTGAGACTCCATCCCA

AAATAAATTAAAATATTAAAT
