# Supplementary material for: Chromothripsis during telomere crisis is independent of NHEJ, and consistent with a replicative origin
Source: HighWire-hosted journal article supplement (doi:10.1101/gr.240705.118), 2019-03-14
Supplement: Supplemental_file_1.zip [file contig.2.DB55_length_603_mean_cov_6.80597014925.docx]

**DB55_length_603_mean_cov_6.80597014925**

AATTGACACCCTAATATCACAATTAAAAGAACTAGAGAAGCAAGAGCAAACACATTCAAAACCTAGCAGAAGGCAAGAAATAACTAAGA
 >chr6:149182510-149182737 - E=7e-125
TCAGAACAGAACCGAAGGAGACAGAGACACAAAAAAACCTTAAAAAAATCAATGAATCCAGGAGCTGGTTTTTTGAAAAGATCAACAAA

ATTGATAGACCGCTAGCAAGACTAATAAAGAAGAAAAGAGAGAAGAAT|C|CATCCCATCTAGGAAGTGAGGAGCGCCTCTTCCCGGCC
 >chr6:148500065-148500443 - E=5e-208
GCCATCCCATCTAGGAAGTGAGGAGCGCCTCTTCCCGGCCACCCATCATCTGAGATGTGGGGAGCACCTCTGCCCTGCCGCCCCGTCCG

GGATGTGAGGAGCGTCTCTGCCCGGCCGCCCCCTCTGAGAAGTGAGGAGACCCTCTGCCTGGCAACCGCCCCGTCTGAGAAGTGAGGAG

CCCCTCCGCCCAGCAGCCACCCCGTCTGGGAAGTGAGGAGCGTCTCTGCCCGGCAGCCACCTCGTCCGGCAGGGAGGTGGGGGGTCAGC

CCCCCGCCCGGCCAGCCACCCCGTCCGGGAGGGAGGTGGGGGGATCCGCCCCCCGCCCGGCCAGCCGCCCC
