# Supplementary material for: Chromothripsis during telomere crisis is independent of NHEJ, and consistent with a replicative origin
Source: HighWire-hosted journal article supplement (doi:10.1101/gr.240705.118), 2019-03-14
Supplement: Supplemental_file_1.zip [file contig.2.DB55_length_686_mean_cov_3.71720116618.docx]

**DB55_length_686_mean_cov_3.71720116618**

GTCAGGAAAGCTGGGTACAGATGTTGGTGGCGCACTTTCTTTGTGATCTATAGGAAGTACTCACCTGTACAGTCTGTTTCCTCACCAGC
 >chr7:150855615-150856099 - E=1e-279 p=3e-02
AAAATAAGGACAGTAATATTTACCTCACAGGGTTAAGGATTAAATGCACAGATATTTGTGCAGCATCCTGAAAGTAATAGGTGCTCAAG

AATTTATCCTTATTGTCCTTTTCTTGGAAATATGTGAGGCGCTTTCCTGGGAATTAAGTTGGGAAAGATCTTGTTACTAGGAATGGTGT

AGGATAGGTGACACTCTATGTATTGAAAAGGACAAATATTTCTGGGAGTGATGATAGAGTAGTTCTGTGTTCTGAGAACTGATTATTCG

GGGACTGCCAGGAAAGAACATTGTACTGAATCTAATTAGGGGTAGATTTCACATGTGTCTTTGGCTCTTTCTCCCTCTTTTCGGTTTCC

CTGTCTCACATTTTGGTGTCCTCTGTAAATCCCAAG|CCT|TTCCTTCTCTTCATTTGTCCCTGTTGCACTTTTCCCTCTTCCTCCTCC
 >chr7:150846974-150847179 - E=1e-111
TCCTCCCATATTCCTTCCAGTCCTCCCAGCTGACATCAAGCTTAGGGGCCTCAGGATTCTGAACTTGAGCAGAAAACAGCTGTTTGTGC

TGCTCAGGCATCCTTGGCTGGGGAAAGGGGAAGGTGGGAAAGAGATGGTTTCATTTTAAGGTCAA
