# Supplementary material for: Chromothripsis during telomere crisis is independent of NHEJ, and consistent with a replicative origin
Source: HighWire-hosted journal article supplement (doi:10.1101/gr.240705.118), 2019-03-14
Supplement: Supplemental_file_1.zip [file contig.2.DB55_length_690_mean_cov_5.59710144928.docx]

**DB55_length_690_mean_cov_5.59710144928**

CTTCACTCAGTTTGTGGTGAATGCTTCCAGGCCTTGGATTCACCGTTCATGGCAGTGGGCTCCCCTCTGGCCCAGGGCAGGTCCATAAA
 >chr18:31880914-31881239 - E=9e-184
TGTCATCTAAGAGCCAAGGCCTAAAATTAAAGACCCTAAGAGCTCATACGGTGCTCTATTCCACTATGGCTGAGCTCATACCTGAAGCC

AGCATGTCTCAAAATCTCACTGAAAGCCCATGGCTTACTATCTGCAAGTATTGCTGCTTGCTCTTCAGGGTACAAGAGCTCTTCAGTCA

GCAGGTGATGAATCTTGCCAGGATTGCACCCTTCCTTTAAGGCAGTAGGTTCCC|TTCT|TATTGCTCGTTAACATTCCTTTCCTTCCG
 >chr18:31882581-31882950 - E=3e-
ATTGAATAACTCCCTTTAGCATTTCTTATAAGATGCAGCTAGTGTTGATGAAATCCATCAGCTCTTGTTGATGAAATCCATCAGCTCCC
207
AAACAAGGGAATTCAAACATTCCCTCGTGTTTGAAGGATATTTTCACTGGATATATTATTCTAGGGTAAATTTTTTTTTTCCTCCAGCA

CTTTAAGTTGTCATACCACTCTCTCATGGCCTTTAAGGTTTGCTCTGAAAAGTGTGCTGCCAGATATATTGGAGCTCCATTGTATGGCA

CTTGCTTCCTTTCTCTTGCTGCTTTTCCTTTCTTTATTCTTGACCTTTAAGAGTTTGGTTATTAAAAGC
