# Supplementary material for: Chromothripsis during telomere crisis is independent of NHEJ, and consistent with a replicative origin
Source: HighWire-hosted journal article supplement (doi:10.1101/gr.240705.118), 2019-03-14
Supplement: Supplemental_file_1.zip [file contig.2.DB55_length_711_mean_cov_5.9746835443.docx]

**DB55_length_711_mean_cov_5.9746835443**

ATCCTACTGAAACTGTTCCAAAATATTGAAGAGGAGGAACTCTTTGCTAACTCATTATATGAGGCCAGCATTATTCTGATACCAAAACT
 >chr9:8151268-8151644 + E=2e-214 p=3e-03
TGGCAGAGACACACAAAAAAAGAAAACTACAGGCCAATATCCCTTATGAACATAGAAATAAAAATCCTCAACAAAATAGTAGCAAATCA

AATCCAGCAGCACATCAAAAAACTAATCAAACATGGTCAAGTAGGCTTTTTTTCCAGGAATCCAAGGTTGGTTGAACATATGCAAATCA

ATAAATGTGATTGATCACATAAACCGAACTAAAAACAAAAGCCATATGATTATCTCAATAAATGCAGAAAAGGCTTTCAACAAAATTCA

ATATCCCTTCATGTTAAAAA|TATAGTAAAATATAGTA|AAATATAGTAAAAAGGCTGCAAAAGATGTGTCCAGTCTTATCCTCCACCC
 >chr9:8205324-8205613 + E=5e-147
AAGTCTGCCCCACCTTTACTCCATTGACTGTTTCAGGTATGACATGAAATTATGTCTCAAACTGCATTAGAATGGACTGTGTAATGCAT

AGATATTAATATTTTGGTCTTGGATTTTCAGTACAAGCCTCTCTACCTCCCATAAGCCTCACAGGCAACGGCAGGTTGCATCCTTAAGG

ACGTGCATTAGATGACCATGTCTTTGTTTCTCTTATTCTCTTGTTTCATTTGTTTCCTTTT|TATTTTTGTAGTCAATATGATTTTTAA

AT
