# Supplementary material for: Chromothripsis during telomere crisis is independent of NHEJ, and consistent with a replicative origin
Source: HighWire-hosted journal article supplement (doi:10.1101/gr.240705.118), 2019-03-14
Supplement: Supplemental_file_1.zip [file contig.2.DB55_length_717_mean_cov_5.49232914923.docx]

**DB55_length_717_mean_cov_5.49232914923**

CATAAATATGAATATTTGTTCCTTTGTAATCTGGCTCTTCCTGTGATAAGATGCCACCAATATTTGGGTAGAATGCTGGGGAGAAGTTA
 >chr1:245354408-245354598 + E=2e-99 p=2e-03
CCTCCCAACATTGAAAAGAGTAAAATCCCAGCACTTTGGGAGGCCGAGGCGGGCGGATTACCTGAGGTCAGGAGTTCGAGACCAGCCTG

GCCAACATGGTG|GCCAACATGG|TGTTGTTGTTGTTTTGAGACAGAGTCTCACTCTGTTGCCCTGGCTGGAATGCAGCAGCACAATCT
 >chr1:244910907-244911398 + E=2e-261
CTGCTCACTGCAACCTCCATCTCCCGGGTTCAGTTCAAGTGATTATCATGCCTCAGCCTCCCAAGTAGCTGGGATTACAGGCGCACGCC

ACCATGCCCGGCTAATTTTTGTATTTTTAGTAGAGATGGGGTTTCACCACGTGGACCAAGTTGGTCTGGAACTCCTGACCTCAAGAGAT

CTGGCCGCCATGGGCTTCCAAAGTGCTGGGATTACAGGGATGAGCCACCGTGCACAGCCTAAATTTTTTTGTGGTGGTTTTTATCTTTT

TAATTTTTTTTATTTTTGTTTTTTCTTTTTCTTATTTTTTATTTTTTCTTTCTTCTTTGTTTTTCTCTTTCAGTTTTATTTCTTTATTT

TAGTGGTTTTTTTTTCACAAGTAGGGTTTGTTTTGTTTTGTTTTTTTGAGATTGAGTTTGGCTCTGTTG|GCCCGGTTTGAGGGCATTG

GCTCTATA
