# Supplementary material for: Chromothripsis during telomere crisis is independent of NHEJ, and consistent with a replicative origin
Source: HighWire-hosted journal article supplement (doi:10.1101/gr.240705.118), 2019-03-14
Supplement: Supplemental_file_1.zip [file contig.2.DB55_length_751_mean_cov_6.52996005326.docx]

**DB55_length_751_mean_cov_6.52996005326**

ACCTTAATGTAACTGGTAGGAAAGA|AGGTTTGAAGGTATACAACCTTTTGAAATTATGTTTCATGAATTTCAAAGAGAAAAAAACAGA
 >chr7:152032916-152033316 + E=5e-212
TTCAGACTATAGGGTTTTTTGGTTTTTTTTTGTTTTTTAAGAAATAGGATCGGCACCAGATCTGATCCCATAAAGCAGGTAAGAAGACA

GGCTTTCAGAGTTCATCCTGTTCTCTTTTCTCCTCTAGCTATTATTATTACTGGCTCTGCCCATGATTCTAACTTGGATCTGCTAAAGA

AACAGTAGGGAGCGATAGTTTTGGTTTTACTTTTGGTTTAGATTTTGTTGTTTCAGTCTTGTGTTCTTTAACAAATAAAGAGGACTCTA

TGACTGCTTCCTAGATAGCAGTAATTCCTGCCACAAAATAGGAACAAACAACAAAAAAGGTATCACT|AA|CACTCTCACAGACACACT
 >chr7:152656719-152
CAGGATCAATACTTTGTATCCTTCAATCCAATCCAGTTGACACTCAATATTAACCATCACAGCATGGAAAGACCCTCTTTGCCGTGTGA
657048 + E=4e-180
GCACAAAAAGAAGACTCAAGGCTGAGAATAGAGCTGACGTCTTGTGACCCAGACCCAGCCCTAAACACAAGGTGGCACTAAAGGGGTTG

GAAGTCTGTGGTGTACCGGGGTATCCACAGTCACAACAAAACTGCAATCCACGCAGAGTCCTAACTATTTCAGCTAACTCCCTGCCCAC

ACACTAAAGGCCTAGCAAAAGGCCCATTTCTGGGCATAAAAC
