# Supplementary material for: Chromothripsis during telomere crisis is independent of NHEJ, and consistent with a replicative origin
Source: HighWire-hosted journal article supplement (doi:10.1101/gr.240705.118), 2019-03-14
Supplement: Supplemental_file_1.zip [file contig.2.DB55_length_780_mean_cov_4.5858974359.docx]

**DB55_length_780_mean_cov_4.5858974359**

TTCTAAAAATAAAGCAGAGACTAAATTTCAAGAAAATTCTCAATTGTTAGAGGTTACAATCGAGTAATCTATGACCTAATATCTCACAA
 >chr14:81295291-81295575 + E=5e-159
AGTCTGCACGAAACATGACTTTGAGAACAGCTTGGGAACAAAGATATTCAAATGGCCTCCAAAAGGTGCCATAAGAACATTAGTGATAC

AGACAATAAACTTGTTCTAACTTAATAGTTCTTTTATGAAAAATAAAGGAAAATCAGACGTGTCACTAAATCAGAAACAGCTGCAAATT

TAATTAACTATTTTATT|AAAAATAAAAAAAAGTATAAA|TAAAAAAAAGTATAAATAGTAACAGGAGACCTGTGTTACTGTTTATAGT
 >chr14:81124349-81124795 + E=2e-244
TTTTTTCTAATGCTATCACCACAGTAAAGTACTTTAGATTGATAATTTAGATCTTCCAGAAACATGAAAAAAATTAAGAGTTAATTGGT

TTTTAATTCACCTAGTACAAGTTTTAAAAAGGTAATTTGTCATTTCTGATCTGACATCGCTTATGGGCATGGCAACTATGGAAGGATTA

TGGTAGGGGATATAGAAAATGATAGGGAGAGGAAATTGGTTTTGAGTCGCCTTAGATTGTACATCAACATTCTTTTGTTGCTGTTGTTT

TCAGGCTTTAATGCCCTATTCACATTTATGCTTGTCAGCAAATTTCCCTTGGCTACATTCAAAAGGCAGCTGTTCATCCACACTCCTCA

ATGCATAAATATATCAAAGCCAATTCTTTGCCTGGGGACAT|TGTTTGTTTGCTAGAAGAATTCCCGCCTT
