# Supplementary material for: Chromothripsis during telomere crisis is independent of NHEJ, and consistent with a replicative origin
Source: HighWire-hosted journal article supplement (doi:10.1101/gr.240705.118), 2019-03-14
Supplement: Supplemental_file_1.zip [file contig.2.DB56_length_264_mean_cov_10.0113636364.docx]

**DB56_length_264_mean_cov_10.0113636364**

AAAAATACAAAATTTAGTTGGGCATGGAGGCATGCACTTGTAATCTCAGCTACTCAAGAGGTTAAGGCACAAGAATCACTTGAACCTGG
 >chr3:61538968-61539187 - E=5e-110 p=0e+00
GAGGCAGAGGTTGCAGTGAGCTGAGATGGTGTGACTGCACTCCACCTGGGTGACAGACTAAGACTTTGTCTCAAAAAGAGAGAAAAAAA

CAAAAAAAAAACTCTGAAAGAGCACAAAATGACAAACAAA|AG|AAAAAAAAAAAAAAAAAAAAAAAAAAAAGAACACAAAAAAAAAA >chr19:21451932-21451976 + E=4e-12
