# Supplementary material for: Chromothripsis during telomere crisis is independent of NHEJ, and consistent with a replicative origin
Source: HighWire-hosted journal article supplement (doi:10.1101/gr.240705.118), 2019-03-14
Supplement: Supplemental_file_1.zip [file contig.2.DB56_length_273_mean_cov_4.94139194139.docx]

**DB56_length_273_mean_cov_4.94139194139**

AGCTACATATATCAACTCATTGAATTCTCACAACAACAAAATAAGTGCTATCATTGTTACCATTGTCATTGTCACCATTATCACCATCA
 >chr6:99717289-99717430 - E=1e-64 p=0e+00
TGTGGCTCCATCATCATCACCACCATCACCATTGTCATCA|TCATCACCACCA|TCACCATTGTCACCATCACCACCACCACCACGACC
 >chr6:99717184-99717328 - E=2e-75
ACCACCACCATCCTCACCGTCACCATCACCATCATCATCATCATCTCAACAGATTAGAAACTGAGGCAAAGTGAGGTTACATAACTCAC

TGGAGATC
