# Supplementary material for: Chromothripsis during telomere crisis is independent of NHEJ, and consistent with a replicative origin
Source: HighWire-hosted journal article supplement (doi:10.1101/gr.240705.118), 2019-03-14
Supplement: Supplemental_file_1.zip [file contig.2.DB56_length_275_mean_cov_4.52.docx]

**DB56_length_275_mean_cov_4.52**

CCCTAGAAGAAAATCTAGGCAATACCATTCAGGATTTAGGCATGGACAAAGATCTCATGGTGAAATTGCCAAAAGCAATTGCAACAAAA
 >chr20:44356941-44357070 + E=2e-63 p=0e+00
ATAAATAAATAGCAAAATTAA|AAAAGCAATTGCAACAAAA|ATAAATAAATAGCAAAATTAAAAAAGCAATTGCAACAAAAGCAAAAA
 >chr20:44357011-44357153 + E=3e-65
TTGACAAATGAGATCCAATTAAACTAAAGAGCTTCTGCACAGCAAAAAAAAAACTATCATCAGACAGAACAGGCAA|ATTAAATAAAGG

GAGAAAAATTT
