# Supplementary material for: Chromothripsis during telomere crisis is independent of NHEJ, and consistent with a replicative origin
Source: HighWire-hosted journal article supplement (doi:10.1101/gr.240705.118), 2019-03-14
Supplement: Supplemental_file_1.zip [file contig.2.DB56_length_278_mean_cov_3.74100719424.docx]

**DB56_length_278_mean_cov_3.74100719424**

AAGGCAGCAGGATATATATATATATATATATATATATATATA|CAAACAGA|AATACAAACAGAAAAGTATTAGGTAAGAATATATTAG
 >chr13:92238742-92238784 + E=6e-14 p=2e-03 >chr13:92228176-92228404 + E=2e-126
ATGTCAATAATACAGTAATTTTGGCAACATTTATTTAGCATGAAAACCGATAATGTCAGAATATGAAAGAAGTAGTAGGTAGAACTGTC

CTGAATATTGTCAGTCATAGCAGTGTAGGATGGAGATTACCAGAGGCTGAAGGATGGGAACATTGGGCAGACAGATGTTGGTCAAAAGG

TACAAAATTTCAG
