# Supplementary material for: Chromothripsis during telomere crisis is independent of NHEJ, and consistent with a replicative origin
Source: HighWire-hosted journal article supplement (doi:10.1101/gr.240705.118), 2019-03-14
Supplement: Supplemental_file_1.zip [file contig.2.DB56_length_301_mean_cov_3.98671096346.docx]

**DB56_length_301_mean_cov_3.98671096346**

CGCTCCCTGCGAGACAGCCGCACCCGCTCCCGGGGAGAGTCATGACAACTGGGG|TC|TTGGCCTGTTCTTGCCATTTGTTGTCCAGCT
 >chr17:79370246-79370302 - E=3e-13 >chr17:79511445-79511692 - E=1e-
CAGCTCAGTCCAACCTTCCTAAGGGACAGGTGGGTGTCCCATAGATAGGCCCAGCAGCTCCCAGTGCCCACAGCGATGCCCTCACCCTG
134
CTGCCAGAGGTGATCTGTGATGCCTGGTGTGGGGGGACGGATCTGGGCCCCCCAAGGGCGTGGCAGGATCTACATGTAGGTTGTCCACA

AGGTGTGTCACAGTAGTGGCCTTCTTCTGGAGCAGG
