# Supplementary material for: Chromothripsis during telomere crisis is independent of NHEJ, and consistent with a replicative origin
Source: HighWire-hosted journal article supplement (doi:10.1101/gr.240705.118), 2019-03-14
Supplement: Supplemental_file_1.zip [file contig.2.DB56_length_358_mean_cov_2.18156424581.docx]

**DB56_length_358_mean_cov_2.18156424581**

TGAGTGAGAATATATGGTGTTTGGTTTTTTGTTCTTGCGATAGTTTACTGAGAATGATGATTTCCAATTTCATCCATGACCCTACAAAG
 >chr9:105552876-105553179 + E=2e-165 p=1e-03
GACATGAACTCATCATTTTTTATGGCTGTGTAGTATTCCATGGTGTATATGTGCCACATTTTCTTGATCCAGTCTAGCATTGTTGGACA

TTTGGGTTGGTTCCAAGTCTTTGCTATTGTGAATAATGCCGCAGTAAACATACATGTGCATGTGTCTTTATAGCAGCATGATTTATATT

CCTTTGGGTATATACCCAGTAATGGGATGGCT|GGGT|ATATACCCAAAGGAATATAAATCATGCTGCTATAAAGACACATGCACATGT
 >chr1:203581425-203581484 - E=5e-21
ATGT
