# Supplementary material for: Chromothripsis during telomere crisis is independent of NHEJ, and consistent with a replicative origin
Source: HighWire-hosted journal article supplement (doi:10.1101/gr.240705.118), 2019-03-14
Supplement: Supplemental_file_1.zip [file contig.2.DB56_length_382_mean_cov_9.35602094241.docx]

**DB56_length_382_mean_cov_9.35602094241**

TGAACAGACGATACACATTTAAAAAAATAACAACACAAGGATCAACCAGACTTGGGAAAAAATCGAAA|ACC|TTACAGTTGAATGACA
 >chrUn_gl000220:138722-138793 + E=3e-31 >chr14:107187331-1
AAGCCACATGATCTAATTTTAAAATAGACAAAGACCTGTATAGAAAGAAGCCTCATCTAAAAATAAATATAAAAAGTGATCGGCATGAT
07187645 - E=1e-159
TTTTAGGTATATGTATGTTTAATATTCAAAAAATACTATATCCTGTTAGAATGGGTAAAATACATATTTTAGACAGTACCAAATGGTGA

TGAGGAAGTTGAAAAACAGGAACGTTCACTCCTTGCGGGTGGGAAGAGGATGCTGAAGAGGCACATACACAACTACAGTTAGTACTTTA

TTGTATATTTCAGAATAGCTAGAAGATA
