# Supplementary material for: Chromothripsis during telomere crisis is independent of NHEJ, and consistent with a replicative origin
Source: HighWire-hosted journal article supplement (doi:10.1101/gr.240705.118), 2019-03-14
Supplement: Supplemental_file_1.zip [file contig.2.DB56_length_426_mean_cov_5.19718309859.docx]

**DB56_length_426_mean_cov_5.19718309859**

TGCCTTAGCCCCCCGAAGTGCTGGGATTACAGGTGTGAGCCACCGCAGCCAGCCAAATTTAGACATTGCTTAACTAAATAACGGGTTCA
 >chr7:138148986-138149183 + E=5e-101
TTTGATCAAACCAGTTCTTCATTTTCCTACTGAATTTGTGAGTACAGGCATCACAAGTCAAGTAATATCTATTACACAAAGGTTAAATA

GGTAGTTGGGATGGA|GAAC|ATGTATTGCAGCTCACTTTTCTAGCTCAGCTCCTGGCATGTGGTTGGTGCCAACCTGGTGGGCCATAT
 >chr11:44628979-44629210 - E=1e-121
TTATTACTGTGAGATGGTGAATCACATAGGGTGGACTGCCCAAGATCCCTGCCGAGGCGACCCGCTTCTGAGTCATAGAAACCGGCTCA

CTGGGGCCTGGTTCTAATCCACCCTGATTATATCACTAACTAGGTCCTAAAGAAGCTCAGTGCCATAGGA|AA
