# Supplementary material for: Chromothripsis during telomere crisis is independent of NHEJ, and consistent with a replicative origin
Source: HighWire-hosted journal article supplement (doi:10.1101/gr.240705.118), 2019-03-14
Supplement: Supplemental_file_1.zip [file contig.2.DB56_length_428_mean_cov_3.69158878505.docx]

**DB56_length_428_mean_cov_3.69158878505**

ATTTTAATTTTAATGAAGTCTAGTTTATCAATTCTTTCTTTCATGACCATGCCTTTGGTGTTGTATCTAGACCCAAGGTCATATAGACT
 >chr13:37793226-37793470 + E=2e-135
TCTCCTGTTATTTTCTAGAAGTTTTATAGTTTTGTAATTTACAGTTAGGTCTATAATTGATTTTGAGTTAATTTTTGAAGGATGTAATA

TCTGTGCCTTTATTTATTTATTTATTTTTTGCATGTGGCTATCCAGCTGTTTCAGCATCATTTGT|G|TAATGGTGGGATAATGTAATT
 >chr13:37878547-37878
TTTCTCTCATTAATATCTCTTTTGATCTGTAAATAATACATTCCTCCACATTCTATATTAAACCCAGAAATAAAATCACAATGTTAATT
732 + E=8e-100
AAAGAGAAAGTGAGGAGAATAATTTCTAACATGTTGAAGGCACAGAATAAACTTTAGAGAATTATTAATATGTC
