# Supplementary material for: Chromothripsis during telomere crisis is independent of NHEJ, and consistent with a replicative origin
Source: HighWire-hosted journal article supplement (doi:10.1101/gr.240705.118), 2019-03-14
Supplement: Supplemental_file_1.zip [file contig.2.DB56_length_485_mean_cov_5.7381443299.docx]

**DB56_length_485_mean_cov_5.7381443299**

TCATGATATCATCTGAATCTAATTTCCTTCCAAAGGTCCCACCACGTATTAGCATCCCGTTGGATGCTATCACCTGAGCCACAGGTGAA
 >chr7:147059996-147060251 - E=6e-142 p=0e+00
GGTTCAGACCCACTGACCCATTGGAGGTGAGGGTTTCATCTTGATTGTACCTCAAATTCATGGATCAGTATAAATCTGATTCAGTCATC

ACTGAATAGACTCTTTGATAAAGCATATATTGTTATCAACTCTGTCTTGAAGTCATTTCCAACTCAATTGACTCTTG|GTCTAGGGAAA

ACTCAATTGACTCT|TGGTCTAGGGAAAACTGGTTCGAACATTCCACAACTACTCTTTTCTCTGCTTTTTTGAACTCACTGTACACTTT
 >chr7:144278467-144278616 - E=5e-78
CAAAAATATTTTTAAGTAATTCTTGTCTTTTAAAACCCTACTCAAAATTTTTGTCTTCTATGGAGCATTTCCAAA|AAATCGGAATAGA

GACGTGTAGTGACAGGGTGTGTTACTTTCTGTAGGTGTCGTTG
