# Supplementary material for: Chromothripsis during telomere crisis is independent of NHEJ, and consistent with a replicative origin
Source: HighWire-hosted journal article supplement (doi:10.1101/gr.240705.118), 2019-03-14
Supplement: Supplemental_file_1.zip [file contig.2.DB56_length_503_mean_cov_5.75149105368.docx]

**DB56_length_503_mean_cov_5.75149105368**

TGGGGTTTCACCATGTTGGCCAGGCTGGTCTTGAACTCCTGACCTCGAGTGATCCACCTGCCTCGGCCTCCCAAAGTGCTGGGATTACA
 >chr7:140969471-140969694 - E=1e-110 p=6e-03
GGTGTGAGCCACCCTGCCTGGCCGCAAAGTCACACAACTCTTATAGTAGAACTTCAGGCACCACTGCTCTCCATTCAAAAGACATAAAG

TCATCAATATCTAGGGAAATCTGTCCTGTCATGAATGTCTAGCCA|TATCAACCACCCAGTAAAAGAGACTTGATTAAATTTTTATTTG
 >chr14:87044482-87044762 - E=6e-157
CCAACTTAGAATGAAGAAATTTTAGAATTTTTACGTGTCTCAGAGGCATCCAGTCTGCAATATCTCCAAAGACATAAATTAATTGATTT

ATTCGACTGTTTTGTGAGCATCAAAACACAAAATACATATAGGGAATTCTAAAATAAAGATATGTTCTAGTTGTTTATATCTTATGGTA

ATTATATTTACACAAAGAAAATAACAGTCATAAAAGCTGAGGTAATGTTGAGTAAGAGT
