# Supplementary material for: Chromothripsis during telomere crisis is independent of NHEJ, and consistent with a replicative origin
Source: HighWire-hosted journal article supplement (doi:10.1101/gr.240705.118), 2019-03-14
Supplement: Supplemental_file_1.zip [file contig.2.DB56_length_511_mean_cov_3.81604696673.docx]

**DB56_length_511_mean_cov_3.81604696673**

TGCTTCTACAAGAAGCATCTGTGAAGTGTGTACTAAGGCAGGCAGAAAGACCGCTCTTTCTTTTAAGCTCATTTTAAAATCTCAGGTCT
 >chr7:126965819-126966007 - E=2e-101 p=1e-02
CACCACTAATGGCAAGGAAAGGCCAGTTTAAAGCAAGCCAGCTCCTGGCCCCCTACCTAGGTCTTCTCAGGCTGGCACAGAAGTTCCTT

GGCTGGGA|GA|CAAGCAGGTGACAGGCAGGCAGAGAAGGAGAGTGGTCAAGGCCTCTCTGTCATATTTGAATGATGGTATCTCATCTC
 >chr7:121723830-121724155 + E=5e-181
CAATACTGGAAAGAATTTTAGGGTTACCAATGGATTGCTGGCATTGCCCAGGATGGTGGCCCTCATGATTACGAACACTGTGATATCTT

CCATCCTCAAGGAATCCATGGGGATGGCTCCCACTCGCACACCTTGTTGAGACCTTTATTCAATGTTTAAATCTATTAAAATCCTTCAT

TCCTGGATCTATATGTTTGTCAAAAGACTATACTGAAAGCTATAGATCCTAACTGCTGGCCAAAAAAA
