# Supplementary material for: Chromothripsis during telomere crisis is independent of NHEJ, and consistent with a replicative origin
Source: HighWire-hosted journal article supplement (doi:10.1101/gr.240705.118), 2019-03-14
Supplement: Supplemental_file_1.zip [file contig.2.DB56_length_544_mean_cov_5.79044117647.docx]

**DB56_length_544_mean_cov_5.79044117647**

AGAGCACCCAAGAGATTATGTCTTTTGACTTCAGCTACCAGGGCAAGTAGAGAAAGACCATCAAGTGCAGGCAGGGTTAGACATGTCTG
 >chr14:87036798-87037072 + E=3e-150
AGCTCAGACTCTCCTTGGGCAGGGCTTGCTTTGGCAGCTGTGGGGACGGGTGTGTGGTTCTCAGGCCAGTGAAGTTATGTTTCCAGGAG

GGGATTATGGCTGCTGTTGCTGTGTCATACAGGTTTCCAGGGAAGTAGGGAAAAGCCAGTAGTGACAGGCCTCACCCAGGTTCCATGCA

GCCAG|CA|TTTTTCTTCCCTAGGACAATACCCTGAAATGCTCGAGTTTGTGTGCCTTCTTCCAGTCCTGCAGGGTCAAGCCAGTTGTC
 >chr14:63623899-63624171 + E=5e-152
AGCCAGGACACATGTACTTGCTTTCCATGAGGGTATGCTCAGAGAACCGGACTGGAGTAGGGGGAAGAAGCATGCAGAGTGTTTGGGGG

ACTTGTGGGCCAGCTGGAGGTGGGGTACACAGGCAAGGCCTCCTGGGTGGCTGTAGTCAGGCTTCCTGAGGGAGTTTGTAGGGCAGTTA

GCAAGGTTTGCA
