# Supplementary material for: Chromothripsis during telomere crisis is independent of NHEJ, and consistent with a replicative origin
Source: HighWire-hosted journal article supplement (doi:10.1101/gr.240705.118), 2019-03-14
Supplement: Supplemental_file_1.zip [file contig.2.DB56_length_613_mean_cov_10.7699836868.docx]

**DB56_length_613_mean_cov_10.7699836868**

ATTCTATATTCCCTTTGCCTTCAGCAAGCACCTCGGCAGGTCGTGGTTTTTTTTCCTGATGGAGTGATCCAAACTTTCATTCCTGAAGG
 >chr8:101220452-101220766 - E=3e-177
GTCTGGGCCATTTGTAGTCCTGGCTGGGTTGGGCTATTGTAATTTCCCATTGACCTTAATCAGAGGGCATGGTAATACTAAGACACGCC

CTCATGGATCTCCTGCATTCCATGCATACTCTTACTTACCTCCATTGTGGAGTAGACTGATTTTGTCTTGAGAGTCCGGGTCAATCACC

CAGCCAACACTGTGACTCCATTCTTAGCCAGTTGACTTAAAGGTA|GG|TTCAAGACCAGCCTGGCCAACATGATGAAACTCCATCTCT
 >chr8:101211597-101211899 - E=3e-165
ACTAAAAATACAAAAAATTAGCTGGGCATGGTGGTGGGAGCCTGTAATCCCAGCTACTTGGGAGGCTGAGGCAGGAGAATTGCTTGAAC

CTGGGAGGCGGAGGTTGTAGTGAGCCAAGATCATGCCATTGCACTCCAGCCTGGGCAACAAGAGTGAAAATCCATCTCAACAACAACAA

CAAAAAAAGGCAAAGAACTTGAATAGACATTTCTCCAAAGAGGATATAGAAATAGCCCATAGGGATTGAAGAGACAGTCAA
