# Supplementary material for: Chromothripsis during telomere crisis is independent of NHEJ, and consistent with a replicative origin
Source: HighWire-hosted journal article supplement (doi:10.1101/gr.240705.118), 2019-03-14
Supplement: Supplemental_file_1.zip [file contig.2.DB56_length_627_mean_cov_4.42105263158.docx]

**DB56_length_627_mean_cov_4.42105263158**

ATCTGGTGCTCTAGGGCTAGGATAGAGAGCAGGCAGAGAGAATGTCAGTCGAAGAAGTTAGAACACAGAAAATCAATGTATCCTCACAT
 >chr4:152182382-152182782 - E=5e-229
TGGAATATTCCAGTATAGCCCCATCCAGTCACCCAGCAGGAGGTTGTATTCTTCTTCAGGTAGACTTCAGATGAGGGAAGGCAGATGAG

CAGGACAACAGGGCTAACAGAAACTGGGGAGGGCAGTTCTACCACAGCGATGGCACTAGATGTGTTTGCTTGGAAATCAGGGTGGGGGG

ATAATCTGGGACACAGGTATTATCGTCATTTTGGAGTCTGCACAACCAAAGATCTGAGCCCACCAATACACTGTATTTCCTGGCATCCT

TAGACCTGAGAAGAGAAGCAGAAGAGATACCGTGGGTTTCT|TGT|ATAGTTAAAGGTGATGAGGAATCAATGATAAAGCTGGAAACAG
 >chr4:152703891-152704121 - E=1e-126
GGGCTGGGACAATGGTTCTCCAAGCATGTGTGAGTTGCTTTTAGGGCCTTAAGTAAAGATGCCCAAGGAAATGAGGCATCGGGGAGCAA

TGTAAATTCATGATCTGAAGATTCAGTACAGCTGGCCCCTGATGCTCTGTGGAAAAAAGGGGATGAAATGTTGCTCAATCTGTTTTCCA

AGGAGA
