# Supplementary material for: Chromothripsis during telomere crisis is independent of NHEJ, and consistent with a replicative origin
Source: HighWire-hosted journal article supplement (doi:10.1101/gr.240705.118), 2019-03-14
Supplement: Supplemental_file_1.zip [file contig.2.DB56_length_670_mean_cov_10.1388059701.docx]

**DB56_length_670_mean_cov_10.1388059701**

TGTTATTAGTATATCTACAAGAGATTAAACTGTGATAACTTAATTTTTTTTTTTTTTTTTTTTACAATTTTGGTAAAATGAGAGAGTGT
 >chr18:68913463-68913770 + E=2e-134
TTATTATTATTATTATTATTATTATTATTATTATTATTTGAGACAGCATCTTGCTCTGTCACACACGCTGGAGTGCAGTGGCATGATCA

TAGCCCATGGCAACCTTGACCTCCTGGGCTCAAGCAATCCTTCACCTCAGCCTCTTAAGTAACTGGGACCAGAGGCACATGCCATTACG

CCTGGCTAATTTTTAAATTATTTGTGTAG|AC|CTATTATATATAATTTTTTATGCTACATATTTATATCCTATATATGTGATATATAT
 >chr18:67818440-67818814 + E=3e-207
ATGATTATATAAAGTTATCATCAATACAGCTATGTACCTAAAATACAATTACTTTGAACCAACACTTAGAGTAACTATCAGGAATTTTT

TTCTCAATATGTGATAGATAATAGTATTTTGTTAGCAGCTATTTAAGGTGAGAGGGGAAAAAAAGCTACTTGAAATATTAATGGAATTT

AAATACAATATAGAAGGTAAAAATACAATAAATAATGAGTTACATGAATACTACTTTTTTTCATTCTGCAAATTTCTACTTCCTATTAT

CAACAATTCAAAGGTCAAAAAGTTACACACATACACTCACATATGTATT
