# Supplementary material for: Chromothripsis during telomere crisis is independent of NHEJ, and consistent with a replicative origin
Source: HighWire-hosted journal article supplement (doi:10.1101/gr.240705.118), 2019-03-14
Supplement: Supplemental_file_1.zip [file contig.2.DB56_length_675_mean_cov_4.76.docx]

**DB56_length_675_mean_cov_4.76**

CACTATACTATATGTACTTCCATACTTAGAAAAACAACCAGAGGAGTGCACACCAGGTTATTAATAGTAATTATCTCTGGAGGTAAGAT
 >chr7:138203030-138203336 + E=2e-172
TATTTCTGAAATGTTTGGATTTTGCCTTTAATTATTAGTAAGATAACTGCGGTTTACTATTTAACCATATTTATTCATATTCTGATTTT

TTCACTTAACATTATGACATAAACATTTTCCAGTTTTATCCCCACACTGGAAAACTAGAGTGTAATAATGAAAACATTATTATTTCTGT

GTTAATGGGTATTCTCTGTTAGGATTTTTACAAAAGTGG|TTATCTGCTGACCTTCTCTCCACTATTATCCTATGACCCTGCCACATCC
 >chr7:139152865-139153207 + E=5e-185
CCCTCTCCGAGAAACACCCAAGAATGATCAATAAATACTAAGGGAACTCAGAGGCTGGCGGGATCCTCTATATGCTGAACGCTGGTCCC

CTGGGCCCCCTTATTTCTTTCTCTATACTTTGTCTCTGTGTCTTTTTCTTTTCCAAGTCTCTCGTTCCACCTAACAAGAAAGACCCACA

GGTGTGGAGGGGCAACCCACCCCTTCAATTCCTGCCTTAACTGATGACATTACTTTGGGAAAGTCCTTTTCCTGGATCATAAGCTCCCC

AACTGAGCACATTGTGACCCTTGCCC|AGGCCGGCCAGGGGGCAACCCTCTTCG
