# Supplementary material for: Chromothripsis during telomere crisis is independent of NHEJ, and consistent with a replicative origin
Source: HighWire-hosted journal article supplement (doi:10.1101/gr.240705.118), 2019-03-14
Supplement: Supplemental_file_1.zip [file contig.2.DB56_length_735_mean_cov_9.59183673469.docx]

**DB56_length_735_mean_cov_9.59183673469**

AAATTTTAATAAAAGCCTGAAAGATATTTCACCATCAATTTCTGAGGGTCTACTCAGGGCAGACGGTGCAGTGTAAGTTGTAAGGTTAA
 >chr2:3208122-3208510 + E=1e-215
TCAATCACAATTTTTGGTTTCCTGGGGACATGGAGACAGCACTCAGCAAGAACTCCACAGGGTGTGATGCATGCAGTAATCTGTTTTTC

GACATTAAAGAAGAATATTCAGTGCTTCCTGGTCCAAAAGGAATGATTAAAGGCGCCCACAAAACTTTCAAGGGAGATGTTACTAATGC

CAGAATGTGAACAAAAGAATACACCTCCTAACGAGCAAAATGACGTGCCTGGCATCGTCTTTAGCAGTTCATGTGGAGCATATCTAAGA

AGAGTCTCAGCGGAAGATTTTGAGAGACAAA|A|CTGCTCCATGTTCTGTTCTTTAATTTCTGAGCAAATCAACTATCGTTCCTTTTTA
 >chr2:3116391-3116734 - E=6e-185
AAATGTTCTTATGCTCCCGTTGTTTCTTTCTGAGTTGCTGTTTTGTTTTGTTTGCGTGTGCTGGGTTTGTCTCTGTGTTGGAGATCTCC

CCCATGTGCCTGGTGATAATGGGCAAGTTCGCCCACGTTTGTGAGCGTTAGCACCTACTACAGGCTTTGTGTGCACGGGTGGGGCTTGC

TGCGTTGTGAGCTTTGTTCTAGGATACTGGGAAGGGGAGCCAATGGTTGCAGTGTGAAATTCCCAACTGACAGAATCTGCAGGTCTTTT

TCCTTGGGCTAGTCAATTTCCTCAG
