# Supplementary material for: Chromothripsis during telomere crisis is independent of NHEJ, and consistent with a replicative origin
Source: HighWire-hosted journal article supplement (doi:10.1101/gr.240705.118), 2019-03-14
Supplement: Supplemental_file_1.zip [file contig.2.DB56_length_736_mean_cov_7.39402173913.docx]

**DB56_length_736_mean_cov_7.39402173913**

ACCCTGCTTCCATTTCTTAACAAAACGTTTTGAAAAGGCAATTATTTAAGGATCTGTTTCTAATAAAGCTTCCGATGTGGCCATGATGT
 >chr7:139566759-139567070 + E=3e-175
TTAATGGAATTGCTGGCAAAGCCCATGAGGGCATGCGTGTTGAAACCATAGAGTAACCATGGCAAAGGGCCTCTCTTCTCCAATGTGCA

GGACACTGGGTTACCTGGCACCGCTGGGCTTCACCTGTTCTTGGAGCATCACAAGTTTTTACCCCTGGAGAAGCGCTATTTGCCAAGGG

AATCTTTCACCATTTCAAATACATCCACTGAAGTTTTTGAAAGC|CACCTGTAATCCCAACACTTTGGAAGGACAGGACTGCAGGACTG
 >chr7:137950987-137951396 + E=1e-206
CTTGAAAACAGGAGTTTGAGACCAGCCTGGGCAACATAATGAGACCTCGTTTCTGCAAAAAAAAAAAAAAAATTAGCCAGGCATGGTTG

CGCGCACACCTGTGGTCCCAGTTACCTAGGAGGCTGAGGTGGGAGGATTGCTTCAGCCCAGGAGTTTGAGGCTGCAGTGAGCTGTGAGC

CACTGCACTCCAGCCTGGGTGACAGAGTGAGGCCCTGTCTCCAAAAAAAAAAAAAGTATGACTGTAGATTTTTTTACAGATATATTCCT

TTAACAGAATAAGAATGGCCTGGTTTGTTAAGTGTTTTTTGTTTTGTTTTGTTTTTTTTGAGACAGAGTCTTGCGCTGTCTCC|CTGGC

TGGATTGCACTTGCGCGATCTCCTCG
