# Supplementary material for: Chromothripsis during telomere crisis is independent of NHEJ, and consistent with a replicative origin
Source: HighWire-hosted journal article supplement (doi:10.1101/gr.240705.118), 2019-03-14
Supplement: Supplemental_file_1.zip [file contig.2.DB56_length_742_mean_cov_9.09703504043.docx]

**DB56_length_742_mean_cov_9.09703504043**

CTCAAAAAAGAAAAGGAAAAAACCCAACAGTATACTTCTCGAGGGCAGGGATTCTTTTGAAAAAAAATTCATAGATTTTATTTTTAGAA
 >chr12:99839116-99839519 - E=1e-230
CTTCTTAGACTCACAGCAAAATTGAGCAGAAATTACAAAGTTCATATATTCTCATACACAAAGCCTCCTCTACTATCAACATTCTGCTC

CAAAATGATACCTTTGTTATAATTGATGAAACTACATGGACACATCATTATCACCCAAAGTTTATAGTTTATACAGGTTCATTCTCGAT

TTATACATTCCATGAGTTGGACAAATATATAATGATGATGTATACTCACCATTATACTGTTAAATATAATAGTTTTACTGCCCTGAAAA

TCCTCAGTGCTTAACCTATTCATCCCTACCTGCCTCCAGTCCTTG|GC|GTATATATTTGAAATTATGATATCATCTTCTTGATTTTCA
 >chr12:99799441-99799784 - E=2e-188
CCCTTTATCATTATGTAATGATTTTTTGTCTGTTTTTATAGTTTTTTCTTGAAATCTATTTTGTCATATCAGTATAGCTACGACTGCTC

TTTTTTGATTTTTATTTGCATGGAATATCTTTGTCCATCCCCTTATTTTCAGTCTATGTGTATCTTTATAGGTGAAGTGTATTTCTTGC

AGGCAATAGATTGTTGGGTCTTTTTTTTAACCCATTCAGCTACTCTCTGTCTTTTGACTGGAGATTCTAGTCTAATTATTCAATATTAT

TGATATTAATGATAAGCACTTATCCTGCCATT
