# Supplementary material for: Chromothripsis during telomere crisis is independent of NHEJ, and consistent with a replicative origin
Source: HighWire-hosted journal article supplement (doi:10.1101/gr.240705.118), 2019-03-14
Supplement: Supplemental_file_1.zip [file contig.2.DB56_length_750_mean_cov_8.32266666667.docx]

**DB56_length_750_mean_cov_8.32266666667**

AATGTTTTTGTTTTCTCAGACAACTACTGATTTTGCATTTATAAGTGTCAAGTGCCATGACTTTTTGCACAGATATACCCATACATGCA
 >chr4:163086867-163087194 + E=7e-182 p=2e-02
TGTATTATGAGTTCTTCAATTCCCAAAGTCATTTTAATAAAGGTGGCAGACACCATGATATGTCAGGAAAGATGATCTGTGGGGGCAGA

TGGGTGTTGCACAATTACAATTACAATGGAGCCAACTGTATAACTTGAACTTAGGCTGGCTACGGCGCACATGATATGCTTCTTTTGGG

AACATCGCATAGCACACTTTGGTCTGCTTCATGCCAATGTGCTGAAATGTCAGAGAAAT|C|ACATATGTTTTATTTCATTGTAATGTT
 >chr4:163087962-163088386 +
CTATTTAAAATGTCTATTAGGTATATGTCTACTGTGGTAAAGGGCATTTAAATACAGTATTTTGTTATTGAAAGAAATATTGACACAAT
 E=3e-240
ATATTTATATTAAATTTCTTAGCTAATTCCAAATTGTGACCTTAAACAAATTTATATGTGTGCATGTGTGTGTGTGTGTGTGTGTGTGT

TTATGTGGGTAGGATATACTAAAGAGAATTTTCAAATATGTTTTCTTAAAATTATGGAAATAAAATTTAAGATATATGAATTAAAAACT

CACTACTAATAAATAAACCCGCAAATTAAAGAACACTATTTCATTATGCACACACACGTATTTTATCGAAGCAGCAATTACAATTTTCA

TGAGATTATATCAGTTTAATTTTAAATCTCAATTAGTTTC
