# Supplementary material for: Chromothripsis during telomere crisis is independent of NHEJ, and consistent with a replicative origin
Source: HighWire-hosted journal article supplement (doi:10.1101/gr.240705.118), 2019-03-14
Supplement: Supplemental_file_1.zip [file contig.2.DB56_length_758_mean_cov_16.2730870712.docx]

**DB56_length_758_mean_cov_16.2730870712**

TTTATTTTCTCATTGGTTTGGCTGGTTTTGTTTGATTTTAGATCCACCAACATGTTTGCCCATTTGGTTACTCACCTGTTCTTTCTTCT
 >chr6:3135282-3135686 + E=3e-228
CAAATGTTCCTTCTAAAAGCATTTATCTTCTCTTCTTCCTGAAGTTATTTTTAGAAGTTATTTAAGGGCAGCCTGTTAATGGTCAACTC

AGTTTTTACCAACAAGTGTCTTTTCTTTCATCCACCTTTTCTGTAAGTCTGTTTAGCTGAGTGTGGAAATGGAAGTGGAAAATCATTGT

CTCCCCCATTCTGCAGTCTTCTGCCTTCCATCCTTGCTGTTGAGAAGTTTCCTGTCCGTCTACGTGGTTCCTGCTTCGGAGTGATGTGT

CTTAACTCTCTGGCTGTTTTTCAGATTTTCTCCTTACCTTTGATATAT|ATGCAGATT|TGGATGGGCTGGGGTCACCAGTGCAGGACC
 >chr6:3145088-3145432 + E=5e-
AGCCGCGTGTTCTGAGCCCAGGCCTGAGGGCCAGAGCCGGTGGGAAAGTCCATGTGGCACAGAGTTGGCATCTTAAGTTCGTGTCAACT
165
AAAGGGGAGGGAGAGGGGTTAAGAGCACCAGCAGGGGACTCAGACCTCGGTTGGAGTGCTGGTTTGGGTTTGAATGCTGGTGTGGGTTG

GAGTGCTGGTGTGGGTTGCAGTGCTGGTTTGGGTTGGAGTGCTGGTTTGGGGTGGAGTGCTGGTTCGGGTCCGAGTGCTGGTTCGGGTG

GAGTGCTGGTTCAGGGTGGAGTGCTGGTTCGGGGTGGAGTGCTGGTT|T
