# Supplementary material for: Chromothripsis during telomere crisis is independent of NHEJ, and consistent with a replicative origin
Source: HighWire-hosted journal article supplement (doi:10.1101/gr.240705.118), 2019-03-14
Supplement: Supplemental_file_1.zip [file contig.2.DB57_length_263_mean_cov_3.99239543726.docx]

**DB57_length_263_mean_cov_3.99239543726**

TATTTCTTTTGGCGAAATGAAACACCTGCAGGCCACATCTGGTCCGCAGGTGACCAGTGAGTGGTGTTCACTTGAATCAATATACCAGA
 >chr7:154616763-154616999 + E=2e-131
TGGCCAAAGAGGACTTCTTCCTGTTTCTCAGCCTTGCTTACAAGCTACTCACTTGGTCATTAAGAAATCACCAAAGCTTATGTAGCCAG

AGGGAGCCATAACAGAAGTGGATGTGCTTAAGTGTCAAGGATCCAACCTGGACACT|CA|AAGGACATGAACATACAGTTCTCAAAA >chr7:156495117-156495146 -
