# Supplementary material for: Chromothripsis during telomere crisis is independent of NHEJ, and consistent with a replicative origin
Source: HighWire-hosted journal article supplement (doi:10.1101/gr.240705.118), 2019-03-14
Supplement: Supplemental_file_1.zip [file contig.2.DB57_length_268_mean_cov_4.26492537313.docx]

**DB57_length_268_mean_cov_4.26492537313**

CTATTTTCATCAATAGAGCTAATAAATATACGGTACTACTATGTAAAAAGGGCAAACAGCATTACTATGC|CCTTGAT|ATTAGAGACC
 >chr7:153732867-153732944 - E=5e-32 >chr7:149761738-
TTGGCAAACGTAAAGTACTTAAAAAATGAATAGACTGCCTTCCGAATGTGAACTCACTGACTAAGCCCAGTGAAAGGAGAGTATGGCAT
149761912 - E=1e-93
GAAATCAGAGAATGATGAATGGCCAGGATTACGTGTGTGTGTGTGTGTGTGTGTGTGTGTGTGTGTGT|GTGTGTGTGTGTGTGTGTGT

GTAA
