# Supplementary material for: Chromothripsis during telomere crisis is independent of NHEJ, and consistent with a replicative origin
Source: HighWire-hosted journal article supplement (doi:10.1101/gr.240705.118), 2019-03-14
Supplement: Supplemental_file_1.zip [file contig.2.DB57_length_269_mean_cov_4.65427509294.docx]

**DB57_length_269_mean_cov_4.65427509294**

CATGAAATCAGAAATTTATT|AATGGACAGGATTACGTGTGTGTGTGTGTGTGTG|TGTGTGTGTGTGTGT|GTGTGTGTGTGTGTGTG
 >chr12:127859429-127859478 - E=4e-15 p=0e+00 >chr7:153733105-1537
AAAATAAACAATATGATTAGTGTTTATTCTTTTTAACAATCCACAAATTGCCTGCTTTTCTCTACTTTTTTTTTGAGATCAAGTCTCAC
33321 + E=3e-108
TCTGTTACCCAGGCTGGAGTACAGTGGGTGTGATCTCAGTGTACTGCAACCTCCGCCTCACAGGTTCAAATGATTCTCCTGCCTCAGCC

TTGCC
