# Supplementary material for: Chromothripsis during telomere crisis is independent of NHEJ, and consistent with a replicative origin
Source: HighWire-hosted journal article supplement (doi:10.1101/gr.240705.118), 2019-03-14
Supplement: Supplemental_file_1.zip [file contig.2.DB57_length_275_mean_cov_16.0981818182.docx]

**DB57_length_275_mean_cov_16.0981818182**

GGGGGGGGGGGGGGGGGGGGGGGGGGGGGGGGGGGGGGGGGGGAGGGGGGGGGGGAGGAGGGGAG|GGGG|AGGGAGAGAGAGGGGGAG
 >chr2:33141565-33141634 + E=3e-21 p=0e+00 >chr22:34792172-34792
GGGGAGAGAGAGAGAGAGAGATTGAGATTGGAGAAAATGGGTTAGATTGATTTGGCCAACATATGTGCATATTTTTTATACAAGCCTCT
380 - E=3e-100
TGGATTTAGTCTTATCTGTTGATCCATGCTCCAAGGCTAGGGAAACAGCATCCCTGCTTTTGTCTGTATCTTAATTAATTCATTGATTC

TGTTGCGATA
