# Supplementary material for: Chromothripsis during telomere crisis is independent of NHEJ, and consistent with a replicative origin
Source: HighWire-hosted journal article supplement (doi:10.1101/gr.240705.118), 2019-03-14
Supplement: Supplemental_file_1.zip [file contig.2.DB57_length_280_mean_cov_18.4678571429.docx]

**DB57_length_280_mean_cov_18.4678571429**

TCTGGAAAGGTGGCTTAATGTATGGGCTCTAGAATAAGAAAAACTTAGACCCTTATCTTGACTCTGCTTCTTATCAGCTATTTGAACGT
 >chr7:141222173-141222329 - E=1e-82
GGCCAAGGCTCTGTTTTTATTGGTAAAACAGAGATAATAAGACAGAGGTCATAGGGTTATTGGGAGC|GTAGCGTCTGTGGTGGGCTCT
 >chr7:157234700-157
TCCGGGCGGCGCCTGGCGTAGCGTCTGGGGTGGGCTGTTCCACGCGGGCGCCTGACGTAGCGTCTTTGGTGGGCTCTTCTGGGCGGCGC
234824 + E=2e-57
CTGGCGTAGCGTCT
