# Supplementary material for: Chromothripsis during telomere crisis is independent of NHEJ, and consistent with a replicative origin
Source: HighWire-hosted journal article supplement (doi:10.1101/gr.240705.118), 2019-03-14
Supplement: Supplemental_file_1.zip [file contig.2.DB57_length_291_mean_cov_4.37800687285.docx]

**DB57_length_291_mean_cov_4.37800687285**

GGTGTGAGCCACCCCACCCAGCCTTAT|CTTATCGTACTTATCGCTCTACCTAAC|ACAGGGTTTCACTCTGTTACCCAGGCTGGAGTG
 >chr17:65271611-65271638 + E=7e-02 p=0e+00 >chr17:65271665-65271867 + E=1e-
CAGCGGTGCAATCATGGTTCACTGCAACCTCTAGCTTCCAAGCTCAAGTGATCCTCCCACCTCAGCCTCCTAAGTAGCTGGGACTGTAG
102
GCATGTGCCACCACACCCAGCTAATTTTTTTTTTTTGAGTGGGAGTCTTGCTCTGTTGCCCAGGCTGGAGTGCAGTGGC|CCCAACTCG

GCGCACTGCATCCTCCGCCGCTCAGGG
