# Supplementary material for: Chromothripsis during telomere crisis is independent of NHEJ, and consistent with a replicative origin
Source: HighWire-hosted journal article supplement (doi:10.1101/gr.240705.118), 2019-03-14
Supplement: Supplemental_file_1.zip [file contig.2.DB57_length_294_mean_cov_2.55102040816.docx]

**DB57_length_294_mean_cov_2.55102040816**

AGCTTATGGAAGTGAAAAAAACTCGGGTTTTAAAGCCACCTACACACTGTATACTCTTAGACAAGTTACTCAATGTCGCCAAGCTTTGT
 >chr1:174552994-174553154 - E=4e-85
TTTCTTCATTTCCCCTACTAACCCACCACAATTGTGATGCTAATTCTAATTTTCAAAATTGTTTTAA|GATT|TTTTGTATCAATGTTC
 >chr1:174566270-174
GTCAGAAATGTTGGCCTGGAATTTTCTTTTTTTGATGTGTCTTTGTCTGGTTTTGTTATCAGGGTAATACTGCCCTCATAGAATGAGTT
566408 + E=8e-72
TGGAAGTATTCACTCCTCCATTATTTTTT
