# Supplementary material for: Chromothripsis during telomere crisis is independent of NHEJ, and consistent with a replicative origin
Source: HighWire-hosted journal article supplement (doi:10.1101/gr.240705.118), 2019-03-14
Supplement: Supplemental_file_1.zip [file contig.2.DB57_length_294_mean_cov_33.7482993197.docx]

**DB57_length_294_mean_cov_33.7482993197**

GCGGCTAGGAGGAAAAAAACGAGTCGGGGA|GGGGGGGGAGGAGGGGGGGGGGGAGGGGGGGGGGGGGGGGG|GAG|AGAGAGAGAGAG
 >chr2:33141358-33141402 + E=4e-06 >chrUn_gl00022
AGAGAGAGAGAGAGAGAGAGAGAGAAGTAAAACCAAACACCACCTCCTTGACCTGAGTCGGGGGTTTCTGGCCTTTTGGGAGAACGTTG
0:130057-130224 + E=3e-71
AGCGACAATGCAGTATTTGGGCCCGTTCTTTTTTTTCTTCTTCTTCTTTTCTTTCTTTTTTTT|GGTCTTAGTCTCTCTGTTTTTTTTA

CACTGTCTGATTTGCTTTGGTGCTGTCTTGG
