# Supplementary material for: Chromothripsis during telomere crisis is independent of NHEJ, and consistent with a replicative origin
Source: HighWire-hosted journal article supplement (doi:10.1101/gr.240705.118), 2019-03-14
Supplement: Supplemental_file_1.zip [file contig.2.DB57_length_313_mean_cov_11.249201278.docx]

**DB57_length_313_mean_cov_11.249201278**

AGAGAGAAACCAGCCTCCTGGATCGGGTGCCTGTGTAGTGACCCCTCCCGAAGGAGGATAAGGTGGTCAGCAGAGGAGATGAGC|TGGT
 >chr17:71731656-71731740 - E=4e-30 p=1e-02
ACACAAAATCAGGATATAATTATTTTTTCAAGTTGGAGTCTCGCTCTGTCACCCAGGCTGGAGTGCAGTGGCACAATCTTCAGCTCACT
 >chr17:66415521-66415746 - E=3e-121
GCAACCTCTGCCTCCCAGGTTCAAGCAATTCTCCTGCCTCAGCCTCCTGAGTAGCTGGGATCACAGGCACCTGCCACCACGCTCGGCTA

ATTTTTGTATTTTTAGTAGAGATGGCGTTTCACCATATTGGCCAGGC
