# Supplementary material for: Chromothripsis during telomere crisis is independent of NHEJ, and consistent with a replicative origin
Source: HighWire-hosted journal article supplement (doi:10.1101/gr.240705.118), 2019-03-14
Supplement: Supplemental_file_1.zip [file contig.2.DB57_length_327_mean_cov_4.12844036697.docx]

**DB57_length_327_mean_cov_4.12844036697**

CTGGCCTCTCAGTTTGATTACTGGGGCCATAAACAGCTTTCCCGTGAGAGCTGAGGTGAACATTTCTTGCTCATTAGGCCTCTTCCAGA
 >chr6:161942780-161942933 + E=9e-81
CAAGCCTCCCTTGCATGCAATGAATATGCACTTGATGCCCAGTGAACATGCACTTGATACTCAA|ACATGGTGAGGCTGG|GACTCACC
 >chr6:1
ATGCCCAGCCTCAGTGTAGAGTCTTTTCGAAGGCCTGGTTTCTGTTTAGCCCTTAGGGAAGGAAGCCTAGAGGTGGTTAGTGAGGGTGG
62389352-162389511 + E=2e-81
GGACATGACAGGACTGTCTGACCTCCCACCCCATCATGGCTGGAACTCAGCTTCCAAGGTGT
