# Supplementary material for: Chromothripsis during telomere crisis is independent of NHEJ, and consistent with a replicative origin
Source: HighWire-hosted journal article supplement (doi:10.1101/gr.240705.118), 2019-03-14
Supplement: Supplemental_file_1.zip [file contig.2.DB57_length_329_mean_cov_8.30699088146.docx]

**DB57_length_329_mean_cov_8.30699088146**

TGTGTTGGGCTCCACGTTTCTGTC|TTCTGTCTTCTGTCTTCTATCACTGAGGTTTTATTCCTATCCTTGTTGTTTTCTATAGTTTCTT
 >chr9:68417363-68417602 - E=1e-117
CTATTATGTCTTTTTCTGTCTTGTGATTTGAAAACTATATGACACATTGTAATGTTTTAATTTTTCTAATTTTTTGCTTTTAATTTTAA

CTAATTTTATTTTTTAGAGAAGTGCAGGTTCACAGCTAAACGGAGCAGAGAGTACAGACTTCTCATATGTCCCTTTCCCCACA|CAC|T
 >ch
CAAAGCTTACAGTGCACATTCACGTTTACTCTTCACGTTGTACGTTCTGAGTCTTGACAAAAGTAr9:68417218-68417287 - E=4e-30
