# Supplementary material for: Chromothripsis during telomere crisis is independent of NHEJ, and consistent with a replicative origin
Source: HighWire-hosted journal article supplement (doi:10.1101/gr.240705.118), 2019-03-14
Supplement: Supplemental_file_1.zip [file contig.2.DB57_length_353_mean_cov_4.19830028329.docx]

**DB57_length_353_mean_cov_4.19830028329**

CCTAAATGAACTATGCTCTCTTTCAAGCCTCTGAGTCTTCCTACATGGTGTTTGCTCTCATCAGAATATGTATCCTCATCTTGTCAACA
 >chr7:147335637-147335814 - E=4e-89
AATGTTCTCTTCACACTGACCTTTTAGGCAAAATTATACCTTGCATTCTCTGCTATTGAAATGTTCTGTACATGTGGAATAAAGCAAG|

ATATC|TTATTTTAGATTTAGGGGGTATATGTGCAGGTTTGTTACCTGAGTAAATTGCATATTGTGGGGGGTTTGACATACAGATTATT
 >chr7:144664055-144664226 - E=1e-88
TCATCACCCAGGTAATGAGCATAATACCTGATAGGTATTTTCTGATTCTCACCCTCCTCCCACCCTTCACCCTCAAGTAGGCCTCAGT
