# Supplementary material for: Chromothripsis during telomere crisis is independent of NHEJ, and consistent with a replicative origin
Source: HighWire-hosted journal article supplement (doi:10.1101/gr.240705.118), 2019-03-14
Supplement: Supplemental_file_1.zip [file contig.2.DB57_length_354_mean_cov_20.4124293785.docx]

**DB57_length_354_mean_cov_20.4124293785**

CAGTCCACCCTCTGCCTGAGCGGGC|GGTCTCGGGTGCGACTGAGCTTCTGACCCTTTGAGAGGAGTCAGGGACACGCAGCGTCTCCAG
 >chr8:144119923-144120161 - E=5e-106 p=0e+00
CAAGCTGGTGGCAGAAACTGATGGAGCATCCTAATCACAAAATAGGAAGAGAGTTTGCAAAATAGGAGCATTTACCAGAAGCCTCTCTC

TCTCCCTCCCTCCCTCTCTCCCTCTCTCTCTCTGTCTCCCTCCCTCCCTCCCTCTCTCTCTCTCTCTCCCTCTCTCTCTCTCTCTCTC|

CCTCCCCCCCC|CTCCCCCCCCCCCCCCCGTCTCTCTCTCTCTC|CCCTCTCCTCCCCCCCGACCTTTTCTTTCCCGTTCAAGCATACC
 >chrX:129694542-129694574 + E=9e-02
TG
