# Supplementary material for: Chromothripsis during telomere crisis is independent of NHEJ, and consistent with a replicative origin
Source: HighWire-hosted journal article supplement (doi:10.1101/gr.240705.118), 2019-03-14
Supplement: Supplemental_file_1.zip [file contig.2.DB57_length_354_mean_cov_21.0480225989.docx]

**DB57_length_354_mean_cov_21.0480225989**

CTCGCGGGCTCTCCACTGCGTCGCCTGCTCTTTCCTTAC|TGGTGGGCTCTTCCGGGCGCCGCCTGGCGTAGCGTCTGTGGTGGGCTCT
 >chr7:157235131-157235269 + E=1e-62
TCTGGTCGGCGCCTGACGTAGCGTCTGTCGTGGGCTGTTCGGGGCGGGCGCCTGATGTAGCGTCTGTGGTGGACTTTCCGGGTGGTG|A

C|GAAAAGAGTAAAATCCCCTGTTACTGGTTCTAAACAAAGCTTGAGTAAAGACTTCATGTTATATCACTAGGAGTTTCTTGGCTTCAT
>chr7:146036710-146036889 - E=2e-96
TCACATCTACTTTTGTTTATTCATAATTTCCATATAGACCTAAGTTATCTGCCAGTAGCTCTAGTTACATATATTTAAATAGATATTCT

T
