# Supplementary material for: Chromothripsis during telomere crisis is independent of NHEJ, and consistent with a replicative origin
Source: HighWire-hosted journal article supplement (doi:10.1101/gr.240705.118), 2019-03-14
Supplement: Supplemental_file_1.zip [file contig.2.DB57_length_366_mean_cov_3.29781420765.docx]

**DB57_length_366_mean_cov_3.29781420765**

AATGATGGATTCCTGCATATAAATGTATAGTTTATTAATGTAATGGAGTCACATTGCCGTGGAAGAATTCTTCCTAATTTTATGCCAGG
 >chr9:107252886-107253122 - E=1e-127
TTAACTATGCTTCTGCAGAGAACACTGCATCTTTCAGATGCTCTGCCAATGGATTTAAGTGTGAGACCGGCTAGTATAAGAGAATGCAA

CCACATATCTGGCCGGAGAACTGCCAGTTAAAATATATATTACTAAAAATAGCCCT|CT|TTGTCTAAATTTCACCATTATCCTCAGCA
 >chr9:107235209-107235341 - E=
ATCATTAGACTTGTGGAAAGTCACAGTTTTGAAGAAAAGTTTTGGATTTGTTTCCTGAGAAAATATGAATGCCTTAATGAATTTATTGC
5e-68
TTAGTTCCGTCT
