# Supplementary material for: Chromothripsis during telomere crisis is independent of NHEJ, and consistent with a replicative origin
Source: HighWire-hosted journal article supplement (doi:10.1101/gr.240705.118), 2019-03-14
Supplement: Supplemental_file_1.zip [file contig.2.DB57_length_372_mean_cov_2.82258064516.docx]

**DB57_length_372_mean_cov_2.82258064516**

GAGCTCAGCCAGCTGATGAGTAGGC|AGCT|GCTCTAAGGTGTAACAATAATTACTTTCCTCCAAAATGTACAATGTTCCTCTTGCGTA
 >chr15:100877088-100877117 - E=6e-06 >chr15:98690145-98690492 + E=5e-189
TTTAATTGACTTTGGCAATCCATATTTAAGACAATGAGGGGAGTTGTCAGCAATGTGAAGACAGAAATGAAGAGAAAGCAAATCGCCGT

CATTGGTATCTAAAACGTGCTGCGTATTTTAACTCCTGGGAATATTTTCTCTGGTTGGTCTTCATCTTGGAGCAATCTGCCTGATGAAA

TTTTTCTGGCCCACTGTGTTTTCTTTCTTTTGGGCCTTTCTCCTCTTGATTTTTTCTTCAAGGGCTCTCTGGTAAATGGCAGGACCCAG

TGTTCAAGTCAGCACTTC
