# Supplementary material for: Chromothripsis during telomere crisis is independent of NHEJ, and consistent with a replicative origin
Source: HighWire-hosted journal article supplement (doi:10.1101/gr.240705.118), 2019-03-14
Supplement: Supplemental_file_1.zip [file contig.2.DB57_length_381_mean_cov_3.95538057743.docx]

**DB57_length_381_mean_cov_3.95538057743**

GCTGGAGGAGCTGGTTTAAAATACTGTATATAATCATATCTTTATGTTTTGTCAAAAATTATTGGTTTTAAAGAGAATATTTTATACAT
 >chr7:127148748-127149010 - E=3e-125
GTTATTTTGTTGTCAAAAATATGATAAAATAGTATGAATATTATTGCACACATATCTTGAAAACTATGAACGCATAATTTCAAGAACCT

GAGTGATGTATCTATTCTCCATAATTGTAGCTTGATTGTAGATCACCAAACAGGAATAAGCCTCCAAAAGTAAAGAAGATACTA|CTGT
 >c
AGCTCCTATGCTCTTTCTACAGTAGAGAAGGGCTTCAGAGAGGACAGGATGGATGACGTCAGCCCCCCCGATAAAGGAGGGTGTGAG|A
hr7:134290367-134290458 + E=3e-34
TCACGTGCGGCAGTTGGGGGAGGGGAA
