# Supplementary material for: Chromothripsis during telomere crisis is independent of NHEJ, and consistent with a replicative origin
Source: HighWire-hosted journal article supplement (doi:10.1101/gr.240705.118), 2019-03-14
Supplement: Supplemental_file_1.zip [file contig.2.DB57_length_400_mean_cov_5.4675.docx]

**DB57_length_400_mean_cov_5.4675**

TCCCCTCTAACAAAATATACTCTTCCTTTATCCTTTATTTAGATATTAAATCACAGCCTTTTATTATGAAACCATTTTATAAATTAAAA
 >chr1:174536546-174536658 - E=6e-56
TATAAGGCATGAGATAAATGGCT|T|AAACATGTTTTTAAAATTAGTTTGGTGTGGTGGTGCATGCCTATAGTCCTAGCTACTTGAGAG
 >chr1:174704021-174704283 - E=1e-127
GCTGAGGCAGGAGGATTGCTGGAGCCCAGGAATTTGAGGCGGCAGTAAGCTATGATTGTGCCACTGTACTCCAGCCTGGGCAACAAAGT

GAGACCCCATATCTTAAAAAAAAAAAAAAGAGAGAGATCCTAATTTCCCAAATTAAATGAGCATACTTCCCACTTAAAAAAAAAACTAA

ATAAGCATAAG|ATTTACTGTATGTAAAAAGAACAAATAAAAATGAT
