# Supplementary material for: Chromothripsis during telomere crisis is independent of NHEJ, and consistent with a replicative origin
Source: HighWire-hosted journal article supplement (doi:10.1101/gr.240705.118), 2019-03-14
Supplement: Supplemental_file_1.zip [file contig.2.DB57_length_405_mean_cov_7.14074074074.docx]

**DB57_length_405_mean_cov_7.14074074074**

TCCCACTGCCTTGGGAACGAGATAATCAAACCAATTAGAGCTATATGTAAAATGAAAGTAAAATAGGCCTGAAGGGCTGGCCCACAAGG
 >chr9:71689769-71690066 - E=2e-164 p=3e-03
ACCCCATAAGAGCCCAGATTCCTTAACTTCCACTTTCATGTCAGAGCAGCCCCACTGCATACCTCTTTTGTGCTGTGTCCCAGATAAAG

GAGTACATTATGTCACCGAGTTCTAAGTAAGTGGGGTGCACTGAAACTTTCAGTAGAAGCAAGATGCAAACACATACAAACATGTATGA

TGTTATTTATTTTCTCACTGGCACTG|GCCT|CCCAAACTGGGATTACAAACATGTGCCACCACGCCCAGCTAATTTTTCTGGGGTTTT
 >chr9:71781945-71782053 - E=2e-53
TTTTTTCGTAGAGACGGGGTTTCACCATGTTGGCCAGGCTGGTTTTG|TACT
