# Supplementary material for: Chromothripsis during telomere crisis is independent of NHEJ, and consistent with a replicative origin
Source: HighWire-hosted journal article supplement (doi:10.1101/gr.240705.118), 2019-03-14
Supplement: Supplemental_file_1.zip [file contig.2.DB57_length_455_mean_cov_8.61538461538.docx]

**DB57_length_455_mean_cov_8.61538461538**

AGGCCTCACTCCCAGCCACTGGACTGCTCCAGCCGACAGAGACAGCCCACGGAGGAAGGAGTGGGGGAAAGGGCTAAGGGCACAAAATG
 >chr7:155154415-155154754 + E=1e-192
TAAAACACGCTCGGGATGCCACCACTTAAAGGGCTAGAGGATGGAGAGAGCAGTGAGGGAGGACGGGCGCTGGGCTGCACACAGCAGGG

GCCCCACCTCACGGGATGCTCTCAGTCTGCAGGCCCAGGGGCTTGTAAGCACCACTGGGGAATTCACTAAACCAGCTTGGAAATTCACT

AAACCAGATTGGAAAAGCCAAGCTCAGGCATAGCCCTCTCCAGCATCCTTGGCTCTCCAGCATCCTCGG|AAA|AAATTTAGTCAGGCA
 >chr7:135620041-1
TGGTGGTATGCACCTGTAATCCCAGCTACTCGGGAGGCTGAGGCAGGAGAATCGCTTGAACCCAGGAGGCAGAGGTTGCAGTGAGCCGA
35620160 - E=5e-51
GGTTGTGCCACT
