# Supplementary material for: Chromothripsis during telomere crisis is independent of NHEJ, and consistent with a replicative origin
Source: HighWire-hosted journal article supplement (doi:10.1101/gr.240705.118), 2019-03-14
Supplement: Supplemental_file_1.zip [file contig.2.DB57_length_469_mean_cov_4.63113006397.docx]

**DB57_length_469_mean_cov_4.63113006397**

TTGGATGGAACCACCAAACTATCTAGTTTGGGTTCTTCTTGACATCTATGTCTCCAGGGCTTCGCTTTCTTCTTTAAGTAGTTACTATC
 >chr11:18868116-18868409 + E=7e-165
CTTGCCACATTTAATGAATATGTTTAAGCTTCCAGAAATCCTTCAAGGTAGAAGGCAGGGTGGTTAAAACCTGACAGTTTTCTGCTCAT

GTTTTTGGAACGTGACACCTGATGGTTGAGGTTGCTGAAGATGCACTCCAAAGATGCATGGGGGTAGAATAAAGGGGAGAAGATGGTGG

TCCTTTTGGAATTTGGGTTGTGCCAA|ATTCA|GAAAAATCTGAATGCTGTGACACTACCAAAGGATCACACTAGATCTCTAGCAATGG
 >chr11:18875335-18875506 + E=2e-91
TCTCTAACCAAAATGGAAACTCAGAAATGACAGATAAAGAATTCAAAGCATTGATCACAGGGAAGCTCAGTGAGATCCAAGACAAGGTT

GAAAATCAACACAAAGATACTTCTAA
