# Supplementary material for: Chromothripsis during telomere crisis is independent of NHEJ, and consistent with a replicative origin
Source: HighWire-hosted journal article supplement (doi:10.1101/gr.240705.118), 2019-03-14
Supplement: Supplemental_file_1.zip [file contig.2.DB57_length_485_mean_cov_5.56701030928.docx]

**DB57_length_485_mean_cov_5.56701030928**

ATAGGAGGAGAAAGAAGACAGAGTTACTCAGAAAAATCTATTTAGGTGGAGCAGAAACTGGCATTATTTTCCCCAGATCCTTTAGAAGC
 >chr4:19441473-19441661 + E=1e-98
AGCATGGCCCTGCTGATACCTTGAATTTTAATTTCTAGCCTTTATAACCGTAATATAATAATTTCTGTCATTTTAATCCACCGAGTTGT

GCTAATT|TGT|GTTACTGTGGTTACCAGAAGCTTCTCTCATTCCAGGAAGAATCTGCTTTCTGGGCTATAGAACGGGCTTTAAAATCA
 >chr4:19685333-19685633 + E=5e-169
GCAGGAACCAGACATGTTGAAGCAGAGACGAGTGAGGGGCACAAAGAACCTATGATTATTTTCAAAGCATCCTGGGAAATTCCAGGAAA

GATTCTGGAGTTTTCTTTCAAAATGATAACTTACGGACAGTTTGAGGAAAAGCTATGGAAATTAAATGATTTGATTTTCCTGCCATAGA

TAGAACAGTCACTTTTTATTCTACAGCTATCCTCCCCCACCT
