# Supplementary material for: Chromothripsis during telomere crisis is independent of NHEJ, and consistent with a replicative origin
Source: HighWire-hosted journal article supplement (doi:10.1101/gr.240705.118), 2019-03-14
Supplement: Supplemental_file_1.zip [file contig.2.DB57_length_486_mean_cov_6.31275720165.docx]

**DB57_length_486_mean_cov_6.31275720165**

TTATGTTTATTGGCTGCTTGTAAGTCTTCTCTTTTGAGAAGTGTCCACTCATGTCCTTTGCTTACTTTTTAATGGGGTTGTTTTTTGAT
 >chr17:67769177-67769331 - E=5e-78
TGTTCAATTGTGTAAGTTCCTTACAGATTTTTAATATCAGACCTTTTTTGGATGCATAGT|TTGCA|CCGCTGCACTCCAGCCTGGGTA
 >chr17:65271405-65271709 -
ACAGAGTGAAACCCTGTCTCAAATAAATACATAAATAAAATAAAATAAGGCTGGGTGCGGTGGCTCACACCTGTAATCCCAGCACTTTG
 E=2e-150
GGGGGCCCAGGCGGGCAGATCACGAGGTCAGGAGTTGGAGACCAACCTGGCCAATATGGTGAAACCCCGTCTCTACTAAAAATATAAAA

ATTTAGCCTGGTGTGGTGGAGCACGCCTGTAATCCCAGCTACTCAGGAGGCTGAGGCAGGAGAATCACTTGAACCTGGGAAGTGGATGT

TGCAGTGAGC|TGAGACCACGCCACTGCACTTCTGCCTGGGTGA
