# Supplementary material for: Chromothripsis during telomere crisis is independent of NHEJ, and consistent with a replicative origin
Source: HighWire-hosted journal article supplement (doi:10.1101/gr.240705.118), 2019-03-14
Supplement: Supplemental_file_1.zip [file contig.2.DB57_length_488_mean_cov_2.76639344262.docx]

**DB57_length_488_mean_cov_2.76639344262**

TCATCTTAGAAGTTTTAGGTGTGATCTGGCTTCCTGGTAACATCAGAATGCTCTAGGAGTTGCCCAGTTTCCAGATACTAGACTTATTG
 >chr1:174552806-174552910 + E=5e-51
CCCTTGTGCT|GTAGA|CCATATGATCATTTAAATAGAAACAAAAAAACCATTCAATAAAATTCACCATCTCTTCATGATTAAATTTAA
 >chr1:174565735-174566124 - E=1e-210
AAAAACCTAAAAAAACTGGATAGAGAAGAAACATACTTCAACACACAATAAAAGCCATATAGAAAAGAACCACATCTACATATGCGTAA

AACCTGAAAATCTTTCCTCCAAGATCTGGAACAAGACAAAGATGCCCACTTTCACCACCGTTATTCAACACAGTCCTGGAAATCCTAGC

TAAAGGAATCAGATAAGATAAAGAAATAAAGGTCATCCAAACTGAAATGGAAGAAGTCAAATTATCCTTCTTTGCAGATGATATAATCT

TATATTTAGAAAAACCTAAAGACTTAATCAAGAAATTATTAGAAC
