# Supplementary material for: Chromothripsis during telomere crisis is independent of NHEJ, and consistent with a replicative origin
Source: HighWire-hosted journal article supplement (doi:10.1101/gr.240705.118), 2019-03-14
Supplement: Supplemental_file_1.zip [file contig.2.DB57_length_492_mean_cov_6.9918699187.docx]

**DB57_length_492_mean_cov_6.9918699187**

AATTGTACATAGGAGCGGCTACTCACAC|GCACCCATCAAGAAAAGTTACTCAAAATGGAAACGGGTCTGCAGTCACCACTGATGAGTC
 >chr18:33935509-33935809 - E=5e-169
ACTTGCATCTCCCTCGTGTGTGATTGAGAATTAAGAGAAGGTCAAAGCCATGGTAGTTCCTCCTAAATACTTTAAGGCCTCAATGTACC

CCCATTTCCTGGTAGGTGGGGACCAGTCAGCAGGGTGAACAGTTGCTCTTACCCGGCGTCATCCTGGAAGCCTTCCAACTCATCCCGCT

GCTCTGCCAGGGTGGCCTCCAAATCCAGGTAGGCGCCATTGTGAGAGAGCTGCAGAGTACAG|CTGTCGCTATGCTGGAGTGCAGTGGT
 >chr18:34121032-34121196
GCGATCTTGGCTCACTGCAACCTCCACCTCCCGGGTTCAAGTGATTCTCCTTCCTCAGCCTCCGGAGTAGCTGCGATTACAGGCACATG
 - E=5e-66
CGCCCATGCCTGGCAAATTTTTGTATATTTAGTAGAGATGGGATTTAGC
