# Supplementary material for: Chromothripsis during telomere crisis is independent of NHEJ, and consistent with a replicative origin
Source: HighWire-hosted journal article supplement (doi:10.1101/gr.240705.118), 2019-03-14
Supplement: Supplemental_file_1.zip [file contig.2.DB57_length_522_mean_cov_14.7126436782.docx]

**DB57_length_522_mean_cov_14.7126436782**

CACACACACACAAATTAGCCATGTGTGGTGGTGGGCGCCTGTAATCCCAGGTACTTGGGAAGCTGAGGCATGAGAATCACTTGAACCTG
 >chr11:45638006-45638451 - E=1e-251
GGAGGCAGAGATTGCAGTGAGCCAAGATTATGCCATTACACTCTAGCCTGGGTGACAGAATGAGACTGTCTCAGAAAAAAAACAACATA

TATACATACATATAATATATATTTAATTTGTATAAATTTATGAGATGCAAGTACAGTTTTGATACATGGATATATTGCATAGTGGTGAA

GTCTGAGCTTTTTGTGTAACCATCACCCAAATCATGTACATTGCACTCCTTAAGTAATTTCTCAGCCCTCACCCCCACATTCTCCCACC

CTCCCTAGTCTCCAATGTCTATTATTCTGCACTCTTGGAATTAGAATTGGATCCGGCTCTTGGAGGTGCTCCTATCTAGTGGGGT|AGA
 >c
|GAGAGAGAGAGAGAGACAGACAGACAGAGAGAACGAAAGAGACAGACAGAGAGAGAGAGATGGACAGAGAGAGACAGThrUn_gl000220:127248-127331 - E=3e-32
