# Supplementary material for: Chromothripsis during telomere crisis is independent of NHEJ, and consistent with a replicative origin
Source: HighWire-hosted journal article supplement (doi:10.1101/gr.240705.118), 2019-03-14
Supplement: Supplemental_file_1.zip [file contig.2.DB57_length_545_mean_cov_5.50458715596.docx]

**DB57_length_545_mean_cov_5.50458715596**

CCTGTAATCCTAGCATTTTGGGAGCCGAGGTGGGTGGATCATCTGAGGTCAGGGGTTCGAGACCAGCCTGGCCAACATGGCAAAACCCT
 >chr7:134937754-134937964 - E=1e-111
GTCTCTACTAAAAATACAAAAATTAGCTGAGCATAGTGGCATGCACCTGTAATCCCAGCCACTCGGCAGGCTGAGGCAGGAGAATCACT

TGAACCCAGGAGGCGGAGGTTGCAGTGAGC|CA|CATGGGGATTATAATTCAACAGGAGATTTGGGTGGGGACACAGAGCCAAATCAGA
 >chr7:134937163-134937500 + E=3e-191
TCTGGTGCCTAATTCAGTGGGTATTCTTGGGGATCCACCTTTTTTCTGTGATTGGAAGTGAGCTGGTCCTAGGATTGTGTCATTGCCCT

GGGGATGACACTATCTGTGGCATCTTCAGAGTAGAAAATTCTTCCATCCTGGCGCAGGGCTGGGACATACCAGGTTATCAGCTGTAGGT

TGTGGAAACTCATCTGTTCACTTTGCACCCCATTCCCAGTGTGTGTTAGTCCTGCTAACCTCCACTGAGGGCTGCTGTATCCCTGCCTT

AAGTCCATTATAT
