# Supplementary material for: Chromothripsis during telomere crisis is independent of NHEJ, and consistent with a replicative origin
Source: HighWire-hosted journal article supplement (doi:10.1101/gr.240705.118), 2019-03-14
Supplement: Supplemental_file_1.zip [file contig.2.DB57_length_558_mean_cov_4.8082437276.docx]

**DB57_length_558_mean_cov_4.8082437276**

TCTCACTCTGGAGAGCTGTGGCACAAAAATAGCTCACTGCAGCCTTGGACTCCTGGGTTCAAGTGAATCTCCCATGTCAGCCTCCCGAG
 >chr7:140280158-140280499 + E=1e-190
TAGTTAGGACTACAGGCATGCACCACCATGCCTATCTAATTTTTAAATTTTTTATAGAGATGGGGTCTTACTATGTTGACCAGGCTGGT

CTTGAATGCCTGGCCTCAAGCAATCCTCCCACCTTGGCTTCCCAAAGTGCTAGGATTACAGGCATGGACCACTGCACCCAGCCTGTTAT

TTTACTATTATTATTATTTATTTATTTTTGAGATGGAGTCTCATTCTGTTGCCCAGGCTGGAGTGTAGTGGTGC|GCCCGGCCTCTTAT
 >chr7:140288
ACACATTTTATTTATCAGAAGACAGAGGCATAGAGGGGTTAGATAAATTGCTCCAGGTATATTGGGAAAAGGTGGTGGAATTAGGGTCT
834-140289051 + E=6e-119
GACCGCAGGAAGTCTGGTTGGAGACTGATGCTTTTAATGACACAGGGCATTATGGAGAGCATTTATTTAAGTGAGGCATGTCAGGAGGG

AAGCTGCATTCACAGGCTCCAAACT
