# Supplementary material for: Chromothripsis during telomere crisis is independent of NHEJ, and consistent with a replicative origin
Source: HighWire-hosted journal article supplement (doi:10.1101/gr.240705.118), 2019-03-14
Supplement: Supplemental_file_1.zip [file contig.2.DB57_length_569_mean_cov_6.82601054482.docx]

**DB57_length_569_mean_cov_6.82601054482**

TAATGCCCATTTAAAATTGAATAGTGGCTATCCCAATGTTTAATTTTTGTATAGATAAAATTGTTGTTAAATTAGTTCTTTTTGACATA
 >chr7:126406239-126406535 - E=2e-166
ATTAGATATCAGGATACATTTCTTTGTATGCTCCTTTTTAGTTTGGGATAGTAAAACCACGTTATCGGTGTGGAGGAAGATTCTGCTTC

CAGTTTATAGGAGCAGAAGGTGAAGTAGCCAGAGCACTGGAAGCTCATCAGACAGTTGGTACAAAAATAAAGAGAACTGTTTGTTTCTT

AAAATTTAATCTTTCTCACATTGTAACC|A|ACTGAATATTTAGAGGCATCTTAAACCGAGATCATCAGCTTTTTATCTTAAAGTACAC
 >chr7:132674585-132674824 + E=4e-129
ATCAAATGTCATAATATTCAATATACGGGTGAATAATGGTGGGAATGGGGAGGTAAAGACACCACCATTAAACTGTGTCTTATCAGCAG

GGCTTAATGGCCAATGTGGTGAAACCCCAACTCTACTAAAAATACAAAAATTAGCCGGGCGTGGTGGCGGGTGCCTGTAATCCCAGCTA

CT|CAGGAGGCTAAGGCAGGGGAATCGCTTGAACCTGG
