# Supplementary material for: Chromothripsis during telomere crisis is independent of NHEJ, and consistent with a replicative origin
Source: HighWire-hosted journal article supplement (doi:10.1101/gr.240705.118), 2019-03-14
Supplement: Supplemental_file_1.zip [file contig.2.DB57_length_590_mean_cov_3.20169491525.docx]

**DB57_length_590_mean_cov_3.20169491525**

TAGAGGAGTTCCAATTCCTAGGATTGTGGAGCGAAAGCGAGAAAGGAGTTTACTCCAAATTGCTCATTTTATCAATAAGGAAGCTGCGG
 >chr17:73112806-73113220 + E=2e-231 p=4e-02
TGCAGACAGCTTCCCCTCGTCTGGCTGTCGCAGGCCAGGATGAGAATGCAGGCTTCCTTCCGTCTGTCCCTGCAGCCACCACACTCACA

GGTACCCTTCCATGCTGGCTTTGCTGTGGCAGCTCTGAGTGAGGTCTGCTCTTTGGCCCAGCACTTCTGCCTCCTCTCTGAGGGCTGGA

AGCTGGATGCTATCCAAACAAATGGATTCGCTCACCTTGCACACTAAGGCCAATTACTGACAAAAATCGCAGTGAGAAAGTGAGGCTTT

GTTTTTGTTTTTGGTTTTGGTTTTTTTGAGACAGATTCTCACTCCGTTGCCCAGGT|TG|ATGCTTCTGACAAGTGCTTAGCTGGCGCC
 >chr17:73115819-73115997 - E=2
TGGCACCTGGTGGCTGGGCAGGCCCTCGGCAAGGGCAGCTCAAAATACAGCTACATCTGGGGACTCGCCCATGCTGAGCTGAAGCAGCC
e-80
CAGGGTGACAGTCTTCCCAGCAGGCTTGGCGTGGTGGCTCACGCCTGTAATCCTAGCA
