# Supplementary material for: Chromothripsis during telomere crisis is independent of NHEJ, and consistent with a replicative origin
Source: HighWire-hosted journal article supplement (doi:10.1101/gr.240705.118), 2019-03-14
Supplement: Supplemental_file_1.zip [file contig.2.DB57_length_604_mean_cov_5.55629139073.docx]

**DB57_length_604_mean_cov_5.55629139073**

TTTGCATATTTATCAGATGTGCCCGCCTTTCTTTTTATTTCATTTTTTTCTTTTTTTCTTTCCTTTTCTCTTCCTTTCCTTTTCTTTCT
 >chr7:145877343-145877610 + E=6e-149
TCCTTTCTTTATCCTTCATTTTTCTTTCTTTTCCTTCCTTTTAATTTATTTTTTAAAGTTGTTAAACTTTAAGATAAAATCAATGGGGC

ATATATCCATTCTCTATCAAAATAGATCTGCCTTATAAATATGTTTCATTTAAAAGTCGATAAATTTTTAAATTCCCAGTATTAATGT|

G|AGAAGAAAACACATTGCAGGAAAAAATCAAACAAATGGCAAAAGGTGGATGAGCGAGACGATCCATTGCATTCCTCTGTCAGCTATC
>chr7:153596278-153596588 - E=8e-166
TCCCCAGCTCTCTTTAGTGCCAATGAATGATTTCCTTCAGCCTGAAATTATGGCTGGATGGTATGATTAGAGGCGACCAAACTGTCCTG

GGAGCTGGGCTCAGCTTCCTCACGTTTCCCAACATAAAGGCAAGGGTAGACATATCACAAACCTGGGTAAGAATACACATCTGGCTTAA

GATAAGCAAAGAAGGAGGAGGAGAAGGAGGAGGAGGAGGAGGAG|GAGAAAGAAGAGGGGGAGAGGGGAGAGG
