# Supplementary material for: Chromothripsis during telomere crisis is independent of NHEJ, and consistent with a replicative origin
Source: HighWire-hosted journal article supplement (doi:10.1101/gr.240705.118), 2019-03-14
Supplement: Supplemental_file_1.zip [file contig.2.DB57_length_609_mean_cov_11.5123152709.docx]

**DB57_length_609_mean_cov_11.5123152709**

CCTTAATGTCTTTTTCTTTCAGATTAAAAACTTACTTAAGGAAAGAGCTGGTATGTATGAAATCCCTCGGGTTTTGTTTGCCTGGGGAA
 >chr11:49722759-49723113 + E=3e-183
TTTTTTTATTTCTCCTTCATGTCTGCAGGATATTTTCACTGGATATACTATTCTTGGATAAAAGATTTTTTTGTTTGGTTTGTTTTTGG

TTTTGTTTTTGTTTTCCCTTCAGCACTTTAGATATGCCATGCCACTCTCTCCTGGCGTGTAAGGTCAAGGCTTTAAGTCTGCTGCCAGA

TGTATTGGTGCTCCTTTGTATGTTATTTGTTGCTTTTTTTCTTGCTGCCTTTATGATCCTTTCTTTATTTTTGATGTTTGGGAGTTT|A

T|TAGCCAGTTGCCACATTTAAGTGGGTGAGAAGGGAGGCTGGTGAGAAGTTTCTTTTTTATTTTATTAAGTTTCAGGGTACATGTGCA
 >chr5:83594253-83594506 - E=2e-140
GGATTTGCAGGTTTGTTACATAGGTAAACGTGTGCCATGGTGGTTTACTGCACCTATCAACCTATCACCTTGGTATTAAGCCCAGTATG

CATTAGCTGTTTTTCCTGATGCTCTCTGCCAAGCCTCTGACAGGCCCCAGTGTGTGTTGTTCCCCTCCCCGTGTCCA
