# Supplementary material for: Chromothripsis during telomere crisis is independent of NHEJ, and consistent with a replicative origin
Source: HighWire-hosted journal article supplement (doi:10.1101/gr.240705.118), 2019-03-14
Supplement: Supplemental_file_1.zip [file contig.2.DB57_length_621_mean_cov_3.57487922705.docx]

**DB57_length_621_mean_cov_3.57487922705**

TTCTTGAGACAGAAACAGCAGAACTTGTGCTTGGCTCATCCCTTCTATCCCTTTGGCCAGTATTCCATGTATATTAAAATATTTTCATT
 >chr7:141710215-141710546 + E=2e-178
AACAATAATTTCCAGAAGAGGCATTTCATTTCCATTCTTGCAGCCATCCCTAGATCATCATTTCCTCATGCTTGGGTTGCTCCAGGTGC

CCCTTGGCATCCCTTCTGAATTCCATTTCTCCTATCCATTCCGTTACATGTGGGATTAGAATTTCTCTTTTTTACATCCAACTTTTGTT

ATTATTTCTACCCAACTTCAGTACATATAGTGGTTTATTACTGTACGTTGAGCCAAGTTCAA|AC|TTAGAGCAATTTCAGTTAGACTG
 >chr7:141712052-14171234
GTGCTTTGGCTGGAATGTGCCCCCTCCAAAATTCACGTGTTGCCAGTATGTTAGTATTAACAGTGGGGCCTTTAAGAGGTGATTAGGCC
4 - E=5e-164
ATGAAGCCTCCTCCCAGACAAAGGGAATTAGGTGCCCTTATAAAGGAGACAGTGGGCTGTCTCTTGCTGTCTACGTGCTGCCATGTGAG

GATGCAGCAAGAAGGTCCTCACAAGATGCCAGCACCTTGGTCTTGTTCTTTCTAGTCTCCATCCATAACTATGATAAGTAAATTTCTGT
