# Supplementary material for: Chromothripsis during telomere crisis is independent of NHEJ, and consistent with a replicative origin
Source: HighWire-hosted journal article supplement (doi:10.1101/gr.240705.118), 2019-03-14
Supplement: Supplemental_file_1.zip [file contig.2.DB57_length_627_mean_cov_7.60765550239.docx]

**DB57_length_627_mean_cov_7.60765550239**

AATGGTGGCCACAGGGCATGGATCCCCAGAGGCACTCATCTCCGTCAGAGGCCAGATCCTATCTCTTTCTTTCTAGATGTTTGAGCAGG
 >chr7:2464871-2465185 - E=3e-177
GCCATCTCATAGGCCCTTTTGGGGGTGGAGGGTAAAAGGTGAATATGAAATATATCCATTTTCAGTGGCTATGACCTGGTCTGGGGTTT

CTGGAAGAGCCCAACAGTCTGGACCCCTCTCTCCTGGCACTCACCCTTGTCTGCACTGTGGTTGTGTCCACACCTGTCTTGACCGACAT

GCTGACTAAGCGCGGTCCTCACTGGGCCGGGGTTTGTTTTTTTAC|GT|AGATAACCTGAGGTCAGGAGTTAGAGACCAGCCTGGCCAA
 >chr7:2600593-2600836 - E=2e-134
CATGGTGAAACCCCACCTCTACTAAAAATAGAAAAATTAGCTGGGTGTGGTGGCAGGCGCCTGTAGTCCCAGCTACTGAGGAGGCTGAG

GCAGGAGAATCCTTTGAACCTGGGAGGCAGAGACTGCAGTGATCTGAGATGGCATCATTGCACTCCAGCCTGGGTGGCAAAGCGAGACT

GTGTCTTTTTTTTTTTTTTTTTT|AGACATATTCTCTCTCTTCTGCTATGCGTGAGTTCCTTTGTACTTTCTTTGCTCGCTGCCATCTC

CTCCTCC
