# Supplementary material for: Chromothripsis during telomere crisis is independent of NHEJ, and consistent with a replicative origin
Source: HighWire-hosted journal article supplement (doi:10.1101/gr.240705.118), 2019-03-14
Supplement: Supplemental_file_1.zip [file contig.2.DB57_length_645_mean_cov_12.7813953488.docx]

**DB57_length_645_mean_cov_12.7813953488**

TCCTACTGGGAGGCCACCAGCCCCTGATGGACCAAGGGGGGTCTGAGGACCCCAAGGCATTGCACATAAGTGTTTGCATGCATACACAC
 >chr2:10485979-10486296 - E=5e-176
ACACACACAGCCTGGCTCTCTCACACATACACAGACACACACACCCCCAGGGCACACACTCAGACACACCCACACACTCACACTTCCAC

TTATTCCCACAATTGTTCTTCCTGGTTTGGATCAACAGACCATCTGTGTGCTTGTGTGACTTAGGAAATCTTCCAAAACACGGCAAAAG

TTCGCAGTCCTTGCCCCTTTTGTGGTGGGGGAGGGGCGTCATAAATAGTT|CCCCACCTCCCCCAGCCCTTCGTTCATGTCAGGCCTTA
 >chr2:10532660-10532988 - E=1e-185
GGCCCCTCTCCGAGTCTCTGGAGAATGGCAGAGGGAGGTGGCAAGGCCAGGGGCTGCATGGCTGGACTGTCTGGAATCAAAGCCCAGCT

GGACTGTTTCCTATTTCCTAACAGTGTGACCTTGACCTGTTATCTCACCTCTCCCTGCTTCCACTCCCGCATTTGTAAAATGGAGATGA

CAATAGTACTACCTAGCTCATCAAGTTTTTGTAAAGATTAAATGAGCTAATGCACAACAAATGCTTGGTACATAGAAAGAACTCAATAA

ATGTCAACTATGACTGAAAGAGC
