# Supplementary material for: Chromothripsis during telomere crisis is independent of NHEJ, and consistent with a replicative origin
Source: HighWire-hosted journal article supplement (doi:10.1101/gr.240705.118), 2019-03-14
Supplement: Supplemental_file_1.zip [file contig.2.DB57_length_655_mean_cov_8.21984732824.docx]

**DB57_length_655_mean_cov_8.21984732824**

TTTCCAGAATACAGAGGTTTCCTTCATACTGAAGATTTGCTCTGACAAGTAATTCCCCCTCACAATCAACTTATCACTAATCAACTGAA
 >chr7:147364101-147364407 - E=2e-172
AACTAGAGTTTTCAGAAATTCTTCAGCTGTCTTCACATCAGCACTTGCAGACTCACCACTTACTTTCACATAACGTAATGAAAAACAGT

TCTTGAATCATTTAAACCACCCAGAGCTAGCAGTAAATTCAACATTGTAGTTGGGTCCAGCCTTTTCTTTCAACATTGCGAACAAACTT

CTTGCTTGGCTGTGATCATCATGGTGCTGGGAGGAATTC|TAGTATCAAAAATGATTGCCTTTGGTACTAGGCACACTTAGGTAGTACC
 >chr7:146824214-146824564 + E=5e-194
TAATATGTTCATTTCAGTGCAACTTGAAAACATTTTCCCAATAATTCTACTTTAGATTACTATTTCTTCTTTGTAGTTTTCTGATTCTT

TGGGATATATTTTTCCTCAATTTTCCTTTTACCTTCTTATATATGAACTGTGTGGCAAATAATACATATTCAGCTAACCATTATTAATA

ATAATTGATTTTATTGTAAATGAGGCCTTTGTTTTTTTTTTACCATCACCTCATAAACCACAATTTGTGTTTCCCCCCCTAAAAGTACT

TAAGCATTTAAGATGCCATAACACTAAATCATA
