# Supplementary material for: Chromothripsis during telomere crisis is independent of NHEJ, and consistent with a replicative origin
Source: HighWire-hosted journal article supplement (doi:10.1101/gr.240705.118), 2019-03-14
Supplement: Supplemental_file_1.zip [file contig.2.DB57_length_677_mean_cov_7.80059084195.docx]

**DB57_length_677_mean_cov_7.80059084195**

AAGCCATCAGGATGATAAGGACCTAACATACAAATCTACTCTGAGGCTGTGGTTCTTAGCCCTAGGTGAGCATCAGAACTACTCATAGA
 >chr17:46287512-46287832 - E=9e-175
ACTTTGTAAAAATAAACATGCCTCAGCCCCACTCCAGATAATCCTGAATCAGTATATCTGGGGTGCAGTTCAGGTATCTACACTTTTTT

AAAAAGTAGACAGGTGATTCCGATGTGCAGCCAGAGTTACGAACCACGGCTCCAAGGTGTCGATGACTGATAATGGCTCCGTATAATAG

TGCCAGCCACACACACGTGACCTCGTGGATAAGCGTCGCTACCTGACATCTGT|ATT|CCAAGGCTGGAATACAGTAGCGCCATCATAG
 >chr17:46265671-46266025 - E=3
CTCACTGCAGCCTCCAATCCTGGGCTCAAGCAATGCTCCCACTTCAGCCTGTCAAAGAGCTGAGACAACAGGTGCACACAACTGTGCCT
e-201
GGCTATTTTATTATTTTTTTATAGAGACAAGGTCTCACTTTGTTGCCCAGGCTGGTCTCAAACTCCTGGCTTTAAGCATACTTCCCATC

TCAGCCTCCCAAAGTGCTGGGATTACAGATGTGAGCCACCACTTCTGCCTTCAAACCCAACTCTTGACCTTTAACTCATTTAATTAGAG

TAGGTACCACTAGAGTTGGCATCTCAGGTTTAACACTCAACAGGCAAATTGGCTCA
