# Supplementary material for: Chromothripsis during telomere crisis is independent of NHEJ, and consistent with a replicative origin
Source: HighWire-hosted journal article supplement (doi:10.1101/gr.240705.118), 2019-03-14
Supplement: Supplemental_file_1.zip [file contig.2.DB57_length_681_mean_cov_12.6196769457.docx]

**DB57_length_681_mean_cov_12.6196769457**

GAGAAAGGAAAGTAAATGTGGCCAGGAGGAGCTGAGTATTCAGCCCTCAAAACATTGCTTACTATACCCTATCTACTGTGCATATGTGT
 >chr17:46249607-46250017 - E=6e-232
GTATATATGTGTGAGTGAGAGAGTGGGAAAAGAGCATGGTGGTAGTGAAAAGAATAACGAGTGTATTTTTCTTCACTTTGCCCCATGTA

TAAAATAGCTAAATATGATTCTGGTACACATATTTACATTATAAGGGCCCAATTCCTATTTTATCGGGTAATGTGACGAGATGAAACCG

GTTAATGGGAGTAAGAAACTTAGGCCAATTATGTTATGACTTTGACCGTATAAACATTTGACTGGAGTTAGACACTGGCATTGAGTTAG

AACCCATTGTGAATCTACGGCAATTAATTAAAAGACCATTCCAGCTACCC|TCAG|CTTCTCTTAATTAAGAAACAATCAGGCCCAGTG
 >chr17:46291687-46291962 - E=1e-147
CAATGGCCTATGCCTGTAATTCCAGCACTTGGCAGGCCAAGGTGGGTAGATTGCTTGAACCCAAGAGTTTGACACCAGCCTGGGCAACA

TGGCAAAATCCCATCTCTACAAAAAATTAAAGAAGAAGAAACAATCAGAAGCTAATAGGAAGCTGTAATTAAAGTTTGATATGTTTTAG

AGGAGATGAAGAAGAAGGCAATACATCCTTTGGGCTGGTCAGTGGTATTTTCTAGTGAAT
