# Supplementary material for: Chromothripsis during telomere crisis is independent of NHEJ, and consistent with a replicative origin
Source: HighWire-hosted journal article supplement (doi:10.1101/gr.240705.118), 2019-03-14
Supplement: Supplemental_file_1.zip [file contig.2.DB57_length_686_mean_cov_10.9183673469.docx]

**DB57_length_686_mean_cov_10.9183673469**

AAATAACACTAGAGCACATAATTAACAACCTGAACAAACTAAATTCAGTTTTACATCAAGACATATGGAAAAATAAATTTAAATTCAAG
 >chr5:84778032-84778360 + E=1e-182 p=2e-02
GAAACTATTAAAAAGTTAAACAAAACATACTAACCAGAAGTACAGGTTTACTTAAAAGTTTTTGGACAAAATGTCTGCACGAATATGTG

CCTGTATGTGTTAAATAATCCCAATGTAGCGTTTAATAATATTAAAAAACATTTTACTCATCTAATTGGCACAGTTTAAATATTGATAG

TATCCAGCATTAGGATGAAAAGAAAGAAGTGGGAGTTCTCATGTACTTCTGATTGGATT|AA|AATAGCTGCTCCATCTGGTAAGAAGG
 >chr11:46093607-46093967 -
GGGAGAAGCAACAAAGAGCAAGCCCTTTATTTTTTAAGGATGTTTACTAGAAGTTGCATGCACCACTTCCAGTTAGATCCCATGGGCCT
E=7e-205
GAACTTAGTCATGTGGCCCCTGCTAGGAGCAAGGAAGTCTGGAAAATGTAGGTAGTTTATTGCTGGTAGTCATGGCCAGATAAAATTCA

AGGACTATTACTGAGTAAGAATTGGGAAATAAATACTGGGAATAATTAGCATTTTCTATTACAGTAGCATATCTGTATCTGTAGGATTA

CTATTTTTTAAATATCTGTCTTCCTTATTAGATTGTTAGTTTCAGGAAGTCAGGGAACGTGTTTG
