# Supplementary material for: Chromothripsis during telomere crisis is independent of NHEJ, and consistent with a replicative origin
Source: HighWire-hosted journal article supplement (doi:10.1101/gr.240705.118), 2019-03-14
Supplement: Supplemental_file_1.zip [file contig.2.DB57_length_702_mean_cov_6.59971509972.docx]

**DB57_length_702_mean_cov_6.59971509972**

ACCATGTGAGGTGAATGATGGCATATGGAAATGTGTACTAATATAAAATGGGCTTTGTGGTTAATCAATAATGCGTTAATAGATTATGG
 >chr7:126433918-126434278 + E=9e-187
GAAATAATGACACCAGTAAGGAATTACTCTGGATGATTAATAGCAGTAGAGATTTCCATGAATTTAAATGGCCCTTGAAAATAACACAT

AATATTTACTTGCCTGGGTTTTCTTTAAGAAAAATATCGATTTGAAACTCAGAAATCACAAAAACAAAGAGGCTAAAATCAGACAGAAT

GTCTTTGCTCTATTACTGAAACCACATAAAAAATAAAATAAAAAAAAAAGCCCTTAGCACTAGCAGTGTCAATTATCCACATTATTTAT

CCTG|GACA|TGGAAACTCTCATTTTATTTAGTATTTTCTAAGTATTTCCTAAAAATGATGTTTTATTTTAAAAAGATGAGTCTTATGT
 >chr7:126435203-126435541 - E=1e-188
TGATACTTTTCATTTATTATAAACTTACCTAAAAATCAGTCAACACCTGTAAAATTTTGGGGAAAACAAATGAGTATATGAGATAGTGG

AGCTGTGATGGGTACTTCACTTTGCTTCTGAGCTAGATTGTTTCAACTCTGCGCCTAATGCCTGAGAGTTTGTGTATAGTCATATCTTT

CGATATCTTTAGAGCCTAGGTTTAGTATCAGTTGTTTTCAATCTCAACTGTCCAGTTGACTCAAAAAGTAAAGCTTTTTAA
