# Supplementary material for: Chromothripsis during telomere crisis is independent of NHEJ, and consistent with a replicative origin
Source: HighWire-hosted journal article supplement (doi:10.1101/gr.240705.118), 2019-03-14
Supplement: Supplemental_file_1.zip [file contig.2.DB57_length_727_mean_cov_10.1801925722.docx]

**DB57_length_727_mean_cov_10.1801925722**

CCCTGCTTGTGAAATAAAAGCCTTTTCATTTAATTTCTGCATGACCTTGTCTAGTCTCTTCTCCTTCATGTACTATCTTAAATTTTCCT
 >chr7:144162753-144163090 + E=6e-191
TTCGCTGAGCACCTGGGAGGTTACCTTTGGTAAAGTTCAAAAGCCGGAAATATCGGAGTGAAGGTTAGGTACTATTAGAAGTCAATTTT

CCATTTATTTGTGCTTGGGAAGATCTAGTCAAATTAACCAGATGACTGAATCCTTGAATTTACAGAAAGCCCTTGAAGTTCTGAAAGAT

TTGCCATGTAAATCCCTCTAAGATTCTGGCTCAATCTTGATCAATTCAGCCAGACCAACTGGTCCACTCA|TA|ATAGGTATTTTCTGA
 >chr7:14466372
TTCTCACCCTCCTCCCACCCTTCACCCTCAAGTAGGCCTCAGTGTCTATTGTTCTTGTCTTTGTGTTCATGTGTACCTAATGTTTAGTT
5-144664113 - E=1e-218
CCCACTTACAAGAGAGAACACACAACATTTGGTCTTCTGTTCCTGCATTAATTGACTAAGAGTAATGGCTTCCAGCTCCATCCCTGTTG

CTGCAAAGGACATAATCTCATTCTTTTCCACGGCTGCATATATGCCACGTTTCCATGGTGTATACATACCACATTTTCTTTATCCAGTC

CACCACTGATGGATATCTGGGTTGATTCCATGTCTTTGGTGTTGTGAGTAGTGCTGTGATGAACATATACGTGCATGTGAATATATGGT

CCCTTATACCACTCTTA
