# Supplementary material for: Chromothripsis during telomere crisis is independent of NHEJ, and consistent with a replicative origin
Source: HighWire-hosted journal article supplement (doi:10.1101/gr.240705.118), 2019-03-14
Supplement: Supplemental_file_1.zip [file contig.2.DB57_length_740_mean_cov_10.3378378378.docx]

**DB57_length_740_mean_cov_10.3378378378**

TGTTTGTTTGAAAAAGACTATGCCTTTCCTTCATATATGTTGCTTAGTTTTGCTGGATACAGAATTGTTCGCTGATAATTGTTTTGTTT
 >chr1:193243830-193244156 + E=4e-177
GAGGAGGCTGAAGATAGGGCCCCAATCCTTTCTAGCTTGTAGGGTTTCTGCTGAGAAATCTGCTGTTAATCTGATAGGTTTTCCTTTAT

AGGTTACCTGGTGCTTGTGTCTCACAGCTCTTAAGATTCTTTCCTTTGTCTTAACTTTGGATAATCTGATGACAGTGGGCCTAGGTGAT

GATCTTTTTGTGATGGATTTCCCAGATGTTCTTTGTGCTTCTTGTACTTGTATTTGCATGTCTAG|TACAT|GAAAATCCATGTATAAA
 >chr1:193208043-
TGAACCCACTCAATTGGAACTTGTATTGTTCAAGGATCAAATGTATATGGTTATGTCCCTATTTCTCTTCTCCCATAATTTTAAATACC
193208446 + E=1e-230
CTCTCAAGAAGATCTCATAGCTTTCAATTACCATTTATATTCCCTCATTCTAAAAATTATGTCTTTAGCTCAATATTCTGGACCTATAT

ACCTCACTCACTATGAGATAACTTCTCTGTGATATCTCATTGGTACATCAAACTCAACCTTTTCCAAATGGAATTGATGGTTTTACTCT

CTTCCTTATTCCTCAAACTATTTCTTATTATCTGTTAGTCCTTTTCAGTAATTTGCCTAAGCCAGAAACTTGGGAGTATATTATCTTAG

CTCTTGGTTGATCTTTCTGCTTTCACTCTT
