# Supplementary material for: Chromothripsis during telomere crisis is independent of NHEJ, and consistent with a replicative origin
Source: HighWire-hosted journal article supplement (doi:10.1101/gr.240705.118), 2019-03-14
Supplement: Supplemental_file_1.zip [file contig.2.DB57_length_749_mean_cov_44.9866488652.docx]

**DB57_length_749_mean_cov_44.9866488652**

TCTCTCTCTTTCTCTCTCTCTCTCTCTCTCTCTCTCTCTCTCTCTCTCTCTCTCTCTCTCTCTCTCTCTCTCTCTCTCTCTCTCTCTCT
 >chr2:198238763-198238880 + E=1e-46 p=0e+00
CCTCTCTCTCTTTCTCTCTCTCTCTCTC|TCTCTCTCTGTCTCTCTCTCTCTCTCTCTCTCTGTCTGTCTGTTTCTCTCTATCTCTCGC
 >chrUn_gl000220:129282-129914 + E=0e+00
TGTCCATCTCTGTCTTTCTATGTCTGTCTCTTTCTCTGTCAGTCTGTCAGACACCCCCGTGCCGGGTAGGGCCCTGCCCCTTCCACGAA

AGTGAGAAGCGCGTGCTTCGGTGCTTAGAGAGGCCGAGAGGAATCTAGACAGGCGGGCCTTGCTGGGCTTCCCCACTCGGTGTATGATT

TCGGGAGGTCGAGGCCGGGTCCCCGCTTGGATGCGAGGGGCATTTTCAGACTTTTCTCTCGGTCACGTGTGGCGTCCGTACTTCTCCTA

TTTCCCCGATAAGCTCCTCGACTTCAACATAAACGGCGTCCTAAGGGTCGATTTAGTGTCATGCCTCTTTCACCGCCACCACCGAAGAT

GAAAGCAAAGATCGGCTAAATACCGCGTGTTCTCATCTAGAAGTGGGAACTTACAGATGACAGTTCTTGCATGGGCAGAACGAGGGGGA

CCGGGGACGCGGAAGCCTGCTTGAGGGAGGAGGGGTGGAAGGAGAGACAGCTTCAGGAAGAAAACAAAACACGAATACTGTCGGACACA

GCACTGACTACCCGGGTGATGAAATCATCTGCACACTG
