# Supplementary material for: Chromothripsis during telomere crisis is independent of NHEJ, and consistent with a replicative origin
Source: HighWire-hosted journal article supplement (doi:10.1101/gr.240705.118), 2019-03-14
Supplement: Supplemental_file_1.zip [file contig.2.DB57_length_797_mean_cov_12.5621079046.docx]

**DB57_length_797_mean_cov_12.5621079046**

TCCAATTTTCAGCTGCAATTGTTTTTATGTTCTTTTATGCAGGGGTTGTGAAGGCTCACTCTAAATAACACTCATCCTCAGCCAGGCTG
 >chr11:47152080-47152451 - E=2e-205
CTCTGCCAAGAGATGCTCGGAAGGACATGGATAGTTCGGGGCATGACCACACCACCCCTTCCAATCCCTGGGGCACCAAGGCTTTGTTA

TCAGGCCACAGCTGAGTAAATACTTCTCAGTGCTACTCTGTGAGGAGGGGGAAGGGAGTGAGGGACAGTGTGGGGGAAGGGAAGAAGGA

GGCAAGACATCTGACGACTTCACTCCCCATGTAGCAGTTGGTATCACATGTCACAGAAAGATTGCTACCCTACTAGGGCCATGTTCCTG

TCAAGCAAAGCCC|CA|TGAAAATGGGAGAAAATGCCTCTCCTGGCCTGGAGATCTCACAGGAGGGAAATGTGTTTCTAACAGCCATGG
 >chr11:47419912-47420340 + E=1e-242
GCCCAGCCCTCCTTCAGGCACCGGCTCTGTCCAGTAGGTACGATTATTACTCCCATTTTACATACGAGGAAACCCAGGGAAAAGAGATG

TCCCAAGGTCACACAGCCTTGCAGGGGCTTGAACCCCAATCCTGTCTAACTCCAAGTCCCATGCACTTACATATACCTGAGAGCCCCTC

CTTCCTTTTCTCCTAGGAGTTCTTCTGTACCTTCCTAGCTTGCAGGGTTGGGGCCCTGGGTGGCAAGTTGAACCATGACTGGATGGGAC

TGGAGGGCTTGGCCCTGCCTGGCTGAGGCTGCAGTCCGCAAATACCTGACTGCCCTTGCTCTTGGTTGGGCTGAGGGACTGCTGCCT
