# Supplementary material for: Chromothripsis during telomere crisis is independent of NHEJ, and consistent with a replicative origin
Source: HighWire-hosted journal article supplement (doi:10.1101/gr.240705.118), 2019-03-14
Supplement: Supplemental_file_1.zip [file contig.2.DB57_length_808_mean_cov_9.62128712871.docx]

**DB57_length_808_mean_cov_9.62128712871**

TGTAAGTGTTGTGCCTTCTGTTTGTCACAGTAATCCTATGAGGAAGGTATTATTCTTTCCATCTTCAAAGGAGGAAAGTGAGGCTTAGA
 >chr7:147238144-147238497 - E=2e-197 p=1e-02
GCAATTAAAGTAACAGAAGGCTATGGAGCTTGAAAGTAATGGAATAGAATGAGATTTGAGCCTATAGCCCCTGTTCCTAGCCACTGCAT

TATACTAAGAGTCAAAGATATCATATGGCTTACTCACTCAAAGTCACTCACTAATTTAGTGTCAATTACCAGACCAGAATTTGGGTGTT

CTAACTGTTACCATCTTCCCCCTATATCGTATACATTTTTAAAAGAAGTAGATGTTAAACATAAATGGAGTTTTCCTTGCTATAAG|TT

TAACCTAACACTCAATTAAGTGTATGAAAAGTGCTGAGATTTATCCATTAATTTTTCTCATAAGAAACTAGATCACGTATTTCTTTTAC
>chr7:146137405-146137838 + E=1e-230
CAAAATTCTATTTGACATTCAACTTAAAATCCAAAGAGTGTAATGAAAGCCCTTAAGATAATGACTGTGAAATAGCAATATAGCCTGAC

GTTTAATGAAGTGGATGGGTATGTCTCTTACCTAAAGAGAAGATGTGAAAATTTAAAGTCACACTGGTTATGCTGTCTGTGTGTATATC

TTCATTTTTAAAAAAATCAGACTCTTGAGAATTTCATTACCTAGCCCTCCACCAAAACAATGCATCTGCGTAAATATTTCACAATTTTC

CATTGTTTTAAAGTTGGCTGATGAGAGGTTACTAAGTACTGTGTGGAATTATTCCAAAATCTTTTATACTACAAC|AAAGAAGTAAAAA

GGGCTCTAG
