# Supplementary material for: Chromothripsis during telomere crisis is independent of NHEJ, and consistent with a replicative origin
Source: HighWire-hosted journal article supplement (doi:10.1101/gr.240705.118), 2019-03-14
Supplement: Supplemental_file_1.zip [file contig.2.DB57_length_839_mean_cov_9.11084624553.docx]

**DB57_length_839_mean_cov_9.11084624553**

GGTCCAGAAACAT|ATGAAAAAAAGCTCAACATCACTGAGCATTAGAGAAATGCAAATCAGAACCACAATGAGATACCATATCATGCCA
 >chrX:79316396-79316818 - E=8e-182 p=0e+00
GTCAGAAGGGCAATTATTAAAAAGTCAAGAAACAACAGATGCTGGTGAGGTGGTGGAGAAATAGGAACACTTTTACACTGTTGGTGGGA

GTGTAAACTAGTTCAACCATTGTGGAAGGCAGTGTGGTGATTCTTCAAGGATCTAGAACTAGAAACACCATTTGACCCAGCCATCCCAT

TACTAGGTATATACCCAAAGGATTATAAATCATGCTAGTATAAAGACACATGCAGATGTATGTTTATTGTGGCAGTATTCACAATAGCA

AAGACTTCAAACCAGCCCAAATGTCCATCAATGATAGACTGGATTAAGAAAATATGGCACATATACATCAGGGAATACTA|CACT|AAA
 >c
AAAAAAGATTATCAGCAGAGTAAACAGATGGCCTAGAGAATGAAATAAAATATTTGCAAAGGTACGTCCAACAAAGGTCCAATATCCAG
hrX:79315210-79315610 - E=1e-225
AGTCTATAAGAAATTGTTTTAAAATATACAAGCAAAAAACAAATAAACCCATTAAGAAGTGGACAAAGAACATGAGCAGACACTTCTGA

AAAGAAGACATGCAAGCATCTCACAAACATGAAAAATGCTCAGTCTCACTAACCATTTGAGAAATGCAAATCTAAACCACAATGAGATA

ACATCTCTCACCAGTCAGAATGGCTATTATTAAAAAGTAAACAAAAACAAAACAAACAATTAAACAAAACGTGGTACTGTTGTTGAATC

AAGTTTAGCCTAAAGCTGCCTCCTCACATACTTTATATTTG
