# Supplementary material for: Chromothripsis during telomere crisis is independent of NHEJ, and consistent with a replicative origin
Source: HighWire-hosted journal article supplement (doi:10.1101/gr.240705.118), 2019-03-14
Supplement: Supplemental_file_1.zip [file contig.2.DB57_length_870_mean_cov_18.6091954023.docx]

**DB57_length_870_mean_cov_18.6091954023**

ATGTTTGTGGTATACCACCTGATGTCGCCACATGGTCTTAGACTCCTCTGATGGCGGGGCATAGTCCTCCTTAGGGCATGAGTGCTAAG
 >chr7:141221656-141222046 - E=1e-222
AGATGGTTTCTTTATGGGAAAATAAGTAAAACAGGAATCTCTCAGCCAGGCAGTAATAACTTCTGGGAACTTGAGAAGGGCAGAACAAG

CAGGTTTCAAAGGGTGAAAACGTAGCACAGCTTACCCTCTTGAAAACTGGCACCCACGGTGGGTCAGGATTCATAGACATCTGAAGGCC

CATATCATTTCATTGCCTCCCCAGCAGCAGGAATTCACGTTCTCATGCTCTGCTGTTGATAGGGTTCAGTGACACTGTTCCCACCTGCT

GTACCTTCAGATCAAATTGAACATAGAGAGAGA|A|CTTGAAAGGCACTAGCAGTACCCTTTTAGTACAACTCGAGCTACCCTTAATAA
 >chr7:147345771-147346252 - E=2e-274
AATTTACCTTAAGATTAATTTATTAATCAGAAATACTGGAACTGACCAAAGGTCATTTGGTAAATAGCATTTCTAATCATGCACACAAA

AAAGAAAATGACAAGAGGGAAAACGTTCTTTCATAGTGGTTGAAGAGATGAGGGTGGGTACAATTCCTGCCGGGATTAGTTCTATACTC

ACTTTGGTGGCCAAGCATTGACTTCTCCATGTTCACAGTTTCTTCAGTGTGTCAGAAAGGTTTTTAATAGGATAGATATACATTTGAAA

CTCAGTTTTTCCACTTCCAGCAATGATGGCTGATATGGTTTGGCTGTGTCCACACCCAAATCTCATCTTGAACTGTAGCTCCCACAATT

CCCACGTGTTGTGGGAGGGACCTGGTGGGAGGTAATTGAATCACGGGGGCAGGTCTTTCCTGTGCTACTCT
