# Supplementary material for: Chromothripsis during telomere crisis is independent of NHEJ, and consistent with a replicative origin
Source: HighWire-hosted journal article supplement (doi:10.1101/gr.240705.118), 2019-03-14
Supplement: Supplemental_file_1.zip [file contig.2.DB57_length_901_mean_cov_6.1653718091.docx]

**DB57_length_901_mean_cov_6.1653718091**

ATACTTGTCATATGTGATTCATTTTGGTGCTTCCCTCTTTCAGCACCTCTAAATAACGAATATCAAAGAAATAGGCTCAAAGAAATACA
 >chr7:145868277-145868509 - E=1e-127 p=4e-02
ATTAAATTTGCAAAAACTACCAAACGCAATAATTACCTAACTATACTATAAAATATTGTTTTGTCTCAAATATATTTTTTTCTACTTAG

TTCTTGTTTGCCTAGAGAGGTTATTTAAAGCTAAGAAGGATTGGTGATTGTCCA|A|TCCTGAAGTACTAAAGCCTGCTTAGTTTGGTT
 >chr7:145870019-145870653 + E=0
TTCTGCAGCTGTGTGTGTGTTTTTTTTCTAATAAAATTGTTTTGTTTCGTTTTAATCCCTTAAAATTCCTATTAACATCAGGAAATATT
e+00
GATATAATCCTATCTGCTTTAAAAAGATTCTAAATGTTCAAATCTCCTCACCAGAACAAGTAGAAGTAAATCTGCTGAAAGGATTTTTA

AAAAAAACTGGCATTTTTAGTGAATTACGTGCAGAGAACTTTATATTTAGTTTTAATTTTGTTCAGTTACCTTAAGCCTTTTTTATCTT

ATTATACATTATTAGAGTAAATTTACATTTTTATCTAATCTCATATTAAGGATTGAATAATACACTTTTTGAAGTTTACAATAGTGTAC

ATATTATATGTATCTTGTTTTAATTTTCTCCAGGTGTTTTTAATAATTGAATTTTCCAGTTTGTTTGCTGTAAACATTGACCATTTAGA

AAATAAATTGATGTAACACTATCTGCTTCCTCAAATAATCCCCCTCACCTCCCCCCACACCACACACACTTATATCTTGCTTGTGTAGT

TTATAGCATAGTAAATATACATGCGTATTTTAGGGTATAAGGCTAAATTCAAATCTGTGATGCTATAT|TCTATATTTTTCCTGTTCTA

TTTTACATATTTAA
