# Supplementary material for: Chromothripsis during telomere crisis is independent of NHEJ, and consistent with a replicative origin
Source: HighWire-hosted journal article supplement (doi:10.1101/gr.240705.118), 2019-03-14
Supplement: Supplemental_file_1.zip [file contig.2.DB67_length_315_mean_cov_5.63174603175.docx]

**DB67_length_315_mean_cov_5.63174603175**

GTGCTGGAGGCACCAAATAGAGTCTGCTCTATACATCTTTTTACAATTTTTAAAA|ATTATTATTATTATTATTATTATTATTATT|TG
 >chr7:72789701-72789786 - E=9e-40 p=0e+00 >chr7:72789455-72789710 - E=3e-
AGACGGAGTTTTGTTCTTGTTGCCCAGGCTGGAGTGCAATGGCACGATCTCGGCTCACCGCAACCTCCGCCTCCCAGATTTAAGCGATT
112
CTCCTGCCTCAGCCTACCGAGTAACTTGGAATACAGGCATGTGCCACCACGCCTGGCTAATCTTGAAGTTTGAGTAGAGACAGGGTTTC

TCCATGGGGGTCCGGCTGCCCTTGCACCCCTGAAGTCAGGTGATC|CGCCC
