# Supplementary material for: Chromothripsis during telomere crisis is independent of NHEJ, and consistent with a replicative origin
Source: HighWire-hosted journal article supplement (doi:10.1101/gr.240705.118), 2019-03-14
Supplement: Supplemental_file_1.zip [file contig.2.DB67_length_332_mean_cov_9.94578313253.docx]

**DB67_length_332_mean_cov_9.94578313253**

ATTCATATTACCTCTTGATAAGTCCACAAGAGAATGGCTCCCTAGTTTTTATCGGAACTTGGAATTATTTTATTTCCTCTTGGTAATGA
 >chr15:43660753-43660978 - E=3e-124 p=0e+00
TGATAGTATAGGTCATTATTTTCTAGATAAAAATTCTTTTCTATACTTGAAGGCACATCTTCCTTTTGGTTGTTTTCCATCTTCAAATT

AAACTATATTTGTTACCTTAAGCTTTCCCCCAG|AAGATCCATTCTTT|AAACCTAAGTTTCTGTTGCTCTCTATTGGAACCTTTAAGT
 >chr15:43660320-43660441 - E=2e-61
TCTCCAAATATCATGTTAATTGTGGGGAACTAAATTATGTTTATTATTTTCCTGAAAGTCTGTTAGA
