# Supplementary material for: Chromothripsis during telomere crisis is independent of NHEJ, and consistent with a replicative origin
Source: HighWire-hosted journal article supplement (doi:10.1101/gr.240705.118), 2019-03-14
Supplement: Supplemental_file_1.zip [file contig.2.DB67_length_583_mean_cov_6.71183533448.docx]

**DB67_length_583_mean_cov_6.71183533448**

GTGGTGGCTGGGGCCTGTAGTCCCAGCTACTCAGGAGGCTGAGGAAAGAGAATGGCCTGAACCCGGGAGGCGGAGTTTGCAGTGAGCCG
 >chr7:72788621-72789033 + E=1e-149 p=1e-02
AGATCGTGCCACTGCACTCCAGCCTGAGTGACAGAGCGAGATCCCGTCTCAAAAAAAAAAAAATTTAAACCAGATCTAAAGAGAGGCCT

GGCGTGGTGGCTCACGCCTGTAATTCCAGCACTTTGGGAGGCCAAGGCGGGCAGATCACCTGAGGTCAGGAGTTCGAGACCAGCCTGGC

CAACATGGCCAAACCCCGTCTCTACTAAAAATACAAAAATCAGCCGGGCGTCATGTTGGGCGCCTGTAATCCCAGTTACTAGAGAGGCT

GAGGCAGGAGAATCACTTGAACCTGGGAGGCGGAGGTTGCAGTGAGCTGAGAT|GGAGCCA|TTGTAAATAAAAGGCTGAGATGGAAAC
 >chr5:171622524-171622691
GCAGGGCTCTCTGCCTGCAAAGCCCATGCTGAGTCTCTCTGGGATGCTTGAGGAGTTTAAGCTCCCTGGTAACCTCCCTGCTGATGCAG
+ E=8e-89
TACCCAGGAGGTAACGCCATGCTCATGTCTTCTGGTCACAGAGGGACTGGA
