# Supplementary material for: Chromothripsis during telomere crisis is independent of NHEJ, and consistent with a replicative origin
Source: HighWire-hosted journal article supplement (doi:10.1101/gr.240705.118), 2019-03-14
Supplement: Supplemental_file_1.zip [file contig.2.DB68_length_356_mean_cov_11.8230337079.docx]

**DB68_length_356_mean_cov_11.8230337079**

AGGCTGGGCATGGTGGCTCACGCCTGTAATCCCAGGCGTTGGATTTGGGAGGCTGAGGCGGGTGGATCACCTGAAGTCAGGAGTTCAAG
 >chr3:183190822-183191092 - E=2e-148
ACCAGCCTGGCCAACATGGTGAAACCCCTTCTCTACTAAAAATACAAAAATTAGCCAGGCATGATGGTGGTGCCTGTAATCCAAGCTAC

TTGGGAGGCTGAGGCAGGAGAATTGCTTGAACCCAGGGGGTGAAAGTTGCAGTCAGCCGAGATCGCGCCACTGCACTCCAGCCTGGGCA

ACA|GAGCAAGACTCTGCC|TCAAAAAAAAAAAGAAGAAGAAGAAGAAGAAAACAAAAAA|GAGCAGAACTGAGTCATTGTGATGAGAC
 >chr5:79612791-79612831 - E=1e-09
TCT
