# Supplementary material for: Chromothripsis during telomere crisis is independent of NHEJ, and consistent with a replicative origin
Source: HighWire-hosted journal article supplement (doi:10.1101/gr.240705.118), 2019-03-14
Supplement: Supplemental_file_1.zip [file contig.2.DB68_length_432_mean_cov_3.81944444444.docx]

**DB68_length_432_mean_cov_3.81944444444**

ATGGTTGAGTCTGTGAGGTTTTCATTCTTTC|ATTCATCCTGTTT|ATAATATTCTCCAGGCTGAATGAAGACAGCTGTATAAACTTAA
 >chr7:109084449-109084480 + E=4e-07 p=3e-03 >chr7:109084848-109085236 - E=1e-222
CTTTATACTGAAAGTTATGTGAACCTTGTAAACTATTTTTGTTTTAAAATATTGGAGTTATATGAAATATGTGGAAAAAATAAAAATGA

TGAATATAAGAAGCATTTCAATTTTGTCTATCAAACATACAAATGAACATATAATACAAAATTATTTTTGCATAAGCAGAATAATATTT

CCATTAGTTTGCACAATACTACTACACACAATTTATTCAGGGAAACCAGATGAAGTAGTAAAAGTGAAGCTGTCTTGTGGATATTTCAT

TTGTTCTGTGGTAAACAAAATTGTTTTGAGGAAACACCATATATATTAACTACCATCCTGTTTCATAAACAGTTCAAA
