# Supplementary material for: Chromothripsis during telomere crisis is independent of NHEJ, and consistent with a replicative origin
Source: HighWire-hosted journal article supplement (doi:10.1101/gr.240705.118), 2019-03-14
Supplement: Supplemental_file_1.zip [file contig.2.DB68_length_440_mean_cov_9.80909090909.docx]

**DB68_length_440_mean_cov_9.80909090909**

AGAGACCATCAAACAGGCTTTGTGTGAGCAATAAAGCTGTTTATTTCACCTGGGTGCAGGTGGGCTGAGTCCAAAAAGAGAGTCAGCGA
 >chr1:79954310-79954519 + E=3e-114
AGGGAAATAGGGGTGGGGCCGTTTTATAGGATTTGGGTAGATAAAGGAAAATTACAGTCAAAGGGGGGTGTTCTCTGGCCGGCAGAGTG

GGGGTCACAAGGTACTCAGTGGGGGAGCT|TT|ATAAAACAAGACAAAAAAAATTCACTTCCTTCAAACAAGTTACAGATTGTATTACC
 >chr1:80101353-80101587 + E=2e-124
AACTTAAATTTTGTCCTGTGCAATAGCCTTTCTTATTCTGAAAACAAGCTGACATTTTATTTTAGGGCAAAATGACTTTTTCTTTATCC

CCCAAGGTGGAGAAAGAGGAGGAGACAGGGAAGAGAGGAACACATTCATTACTTTCAGTTGTATTTTGTTGCCACTATCATTCCTA
