# Supplementary material for: Chromothripsis during telomere crisis is independent of NHEJ, and consistent with a replicative origin
Source: HighWire-hosted journal article supplement (doi:10.1101/gr.240705.118), 2019-03-14
Supplement: Supplemental_file_1.zip [file contig.2.DB68_length_445_mean_cov_8.08988764045.docx]

**DB68_length_445_mean_cov_8.08988764045**

TTTCTCAGGTTCTCAGTACACAGCGGGAAACAAGTCAGTATTCCTGGCCTGGTGGAGCTCAGTCAAGTGGGGAGAAGATAAGCAGACAA
 >chr20:536625-536804 + E=4e-87
ATCTAGCATTGCAAACTGGGATTATCGCCAGGAGAGACAAGTGGGCGGTGTATGAGAGTGCATGAGAGTAGAGCCGACCTAGT|CGAGG
 >chr
GC|CAAGCGGGACGGCGGGCCGCCGCCCCCGGGACCCGGGCCGGCCGAGGAGGGGGCGCGCGAGCCCGGCTGGTGCAAGACCCCGAGCG
20:306587-306860 + E=7e-153
GCCACATCAAGAGGCCGATGAACGCATTCATGGTGTGGTCGCAGCACGAACGGCGGAAGATCATGGACCAGTGGCCCGACATGCACAAC

GCCGAGATCTCCAAGCGCCTGGGCCGCCGCTGGCAGCTGCTGCAGGACTCGGAGAAGATCCCGTTCGTGCGGGAGGCGGAGCGGCTGCG

GC
