# Supplementary material for: Chromothripsis during telomere crisis is independent of NHEJ, and consistent with a replicative origin
Source: HighWire-hosted journal article supplement (doi:10.1101/gr.240705.118), 2019-03-14
Supplement: Supplemental_file_1.zip [file contig.2.DB68_length_473_mean_cov_9.96405919662.docx]

**DB68_length_473_mean_cov_9.96405919662**

CTAATAATACAAAAAATTAGCTGGGCATGGTG|ATGCACT|CCTGTAATCCCAGCTACTCGGGAGGCTGAGGCAGGAGAATCGCTTGAA
 >chr20:31259952-31259984 + E=1e-07 >chr3:183190496-183190931 - E=1e-209
CCCAGGAGGCAGAGGTTGCGGTGAGCCGAGATCGCGCCACTGCACTCCAGTCTGGGCAACAAGAGCGAAACTCCATTAAAAAAAATGAG

AACAAGGGCTAGCAAAACGCAGGAGGTAGCAAAACACAAATGATTCCAAACCTCAGACAGTGAAGCAAATGCTCTTCCTTCTTGGATTG

CTTCTCTTGACCCCACCCACCTGTTCCCCTGCCCTTTCCTTCTGATGGGAACTTGGGATGATCCGTGCTGCATGGGGGAGGAAGGGCAG

GTGAGGAGGGACGGGACCTGGGCTGACCAGCTAGCTGTTCTGAGCTGCCATGGGGTCTGTCTGGAATTTATAGACATTAGGTGTTAACC

TGGTATCTCTGTGCCTCAGTTTCTTCTTCT
