# Supplementary material for: Chromothripsis during telomere crisis is independent of NHEJ, and consistent with a replicative origin
Source: HighWire-hosted journal article supplement (doi:10.1101/gr.240705.118), 2019-03-14
Supplement: Supplemental_file_1.zip [file contig.2.DB68_length_672_mean_cov_6.56994047619.docx]

**DB68_length_672_mean_cov_6.56994047619**

CTCC|CCCTTCTCCCCTCCCCCTCCCCCGCTTCCTTCCCCTCCCCATCCTCCTCCCCCTCCTCC|CCCTCTTACTCCTCCTCC|CCTCC
 >chr2:82542503-82542562 + E=1e-08 p=0e+00 >chr
TCTTCCTCTTCCCCCTCCCACTTCCCCTCTCCCTCCTTCTCCTTCCTCCACCTCCTCCCTCCCTCTTCCTCCCCCCCCCCTCCTCCTCC
8:124219242-124219833 + E=0e+00
ACTTCCCCTCCCCATCCTTCCCCCTTCTCCTCCATCACTCTCTCTCCTCTTCCCCTCCAGCTTCACCTGGCTCTGCGGACACGTGCACC

GGAACATCCTCTCCAAGTTCACAGGCCAGGCGGTGGAGCTGTTTGACGAGGAGTTCCGCCACCTCTACGCCTCCTCCAAGCCTGTGATG

GGCCTGAAGTCCCCGCGGCTGGTCGCCCCCGTCCCGCCCGGAGCAGCCCCGGCCAATGGCCGCCTTAGCAGCAGCAGTGGCTCCGCCAG

TGACCGCACGTCCTCCAACCCCTTCAGCGGCCGCTCGGCAGGCAGCCACCCCGGTACCCGAAGTGTGTCCGCGTCTTCAGGGCCCTGTA

GCCCCGCGGCCCCACACCCGCCTCCACCGCCCCGGTTCCAGCCCCACCAAGGCCCTTGGGGAGCCCCGAGTCCCCAGGCCCACCTCTCC

CCGCGGCCCCACGACGGCCCGCCCGCCGCTGTCTACAGCAACCTGGGGGCCT
