# Supplementary material for: Chromothripsis during telomere crisis is independent of NHEJ, and consistent with a replicative origin
Source: HighWire-hosted journal article supplement (doi:10.1101/gr.240705.118), 2019-03-14
Supplement: Supplemental_file_1.zip [file contig.2.DB68_length_831_mean_cov_13.7027677497.docx]

**DB68_length_831_mean_cov_13.7027677497**

ACAGTTCATGCTTTGATAATGCTAAAGTTGATAAGTAGATTAAGATGTGATAGAACAATCTGTAAATCTTAGTGCTTCCTAACTTTTGA
 >chr20:26204272-26204614 + E=6e-162
GAAAACATTTTTAGGCAAGATATGCTGATTTAAGGAAGAAAAGTTGCTAATGGATGAGGCATGTCCCTTAAAGACAAACACTATGAACA

CTGTGTACAGCCTTTATAATACAAAGATGCCAGGTTTTTTTTTAAGTCCTTGGAATCTCAGTTGGCAACTTTGAAATTCATGTGTAATT

CATGAGTTTTTTAAAAGAAATGTAATAAGTAACACAAGTGATTCTAGAGCTTGTCTTTAGGCTGAGGTAGATA|T|ACTTCTTTTTTCC
 >chr20:262053
TGTTTATGCCAATTATTTCTATTCCTCTTTACATATAGACAGAGAGATATGACTAAAATGAGTCATAGACAACGACATCTACTAAATTT
71-26205830 + E=4e-207
ACCTATTTTCATGTTGAATTCCACAACAGATTTCAAATACAACCAAAATCTCCAAATGAAATCTTAATTCTAAATTGAGTGCTTGTAGT

CTTCAAATATGTTCAAATAGAACATCAAAGCTCAATAAAAACAGTTATATCACTTGGGATGGTATTTAAAATACTTTTTCCTAAATAAA

TTCAGCTTCAGAGGATGAGAAAACCTTCATTAGGAGATGTATCTTAAAGGACAAATTAAGTTAAACAAATGTGAAAGAAATCATACTTT

ATTATGTTGAATAGTAAGATACTTTTGTTACTATTGTGAATTAATGCCATCCAAATATTGAGTGATGTAATTCAATTTAGTAAAAGAAA

|GATCGGAAGAGCGTCGTGTAGGGAAAGAGTGT
