# Supplementary material for: Chromothripsis during telomere crisis is independent of NHEJ, and consistent with a replicative origin
Source: HighWire-hosted journal article supplement (doi:10.1101/gr.240705.118), 2019-03-14
Supplement: Supplemental_file_1.zip [file contig.2.DB69_length_275_mean_cov_17.8109090909.docx]

**DB69_length_275_mean_cov_17.8109090909**

AAAATTTGGTATTTTGTGTGGTGGATGAGAATGTAGGCTTCTATTCTGCCCTCTTATTCTGTCTCTGCCTTAAATTTTTTAGATTCAGG
 >chr9:66470737-66470955 - E=3e-100
GAGTATATTTGCAGGTTTATTACATGGATATATTGTGATGCTGAGCAATGTGGGATATTATTGATCCCATCACCAAGGTAGTGAGTATA

TATTGTGGGATATAATTGATCCCATCACCTAGGCAGT|TAGCAGAACATTTATAC|TTTCTCACCCCTTCCCCTCCTCCTTCCCTCCTT
 >chrY:20529943-20529986 - E=2e-0
CATCTAGTAG8
