# Supplementary material for: Chromothripsis during telomere crisis is independent of NHEJ, and consistent with a replicative origin
Source: HighWire-hosted journal article supplement (doi:10.1101/gr.240705.118), 2019-03-14
Supplement: Supplemental_file_1.zip [file contig.2.DB69_length_277_mean_cov_9.68592057762.docx]

**DB69_length_277_mean_cov_9.68592057762**

TTTTTCTTCATTTCATAATTCATACTAAAAATAATTTTGTCGTGTAAAGAAATGAGTGTTAAAAAATTATCCACTCCAGG|TGT|GGCT
 >chr1:106669266-106669349 - E=1e-38 p=3e-02 >chr1:
TCCCCTCTTATATGCTTACCCTATTGGCATTAACCTCAGCAAAGCAGTCAATATATTTAATATTGTCAGATAGTATATATATGAATTTT
106668550-106668747 - E=1e-107
TCTTTTCAAACATTCTTATTGTTCTCTATTTTCTTCAGAGTACAAGCCATGGCCCTAAACCTACAATGGCCTATGGGTTCCTGGTATGT

TTCCAGTTCATT
