# Supplementary material for: Chromothripsis during telomere crisis is independent of NHEJ, and consistent with a replicative origin
Source: HighWire-hosted journal article supplement (doi:10.1101/gr.240705.118), 2019-03-14
Supplement: Supplemental_file_1.zip [file contig.2.DB69_length_356_mean_cov_6.3202247191.docx]

**DB69_length_356_mean_cov_6.3202247191**

GAATACATTAAAACACAAAGATACACACACACACACACACACACACACACACCTATCAACAGGTGAACATGGAATATCAGGTTGAAAAT
 >chr9:82616554-82616787 + E=6e-120
TAGCAAAGACCCCCATGTGCACACACACATTCACACCACTCATATTTAAGGAAAATGAATACCATAAAATAGAAAGTAGTATAGTAAAC

TTAAAATAAATATAACTCATATACATAGATAAAAATAAAGCATATTTCGTCAGGAGGAA|TGAGAACATGCGGTGTTTGGTTTTTTGTC
 >chr10:96514839-96514958 +
CCTGCGATAGTTTGCTGAGAATGATGGTTTCCAGTTTCATCCATGTCTCTACAAAGGACATGAACTCATCATTTTTTATGGCTGCATAG
E=3e-57
T
