# Supplementary material for: Chromothripsis during telomere crisis is independent of NHEJ, and consistent with a replicative origin
Source: HighWire-hosted journal article supplement (doi:10.1101/gr.240705.118), 2019-03-14
Supplement: Supplemental_file_1.zip [file contig.2.DB69_length_447_mean_cov_4.02684563758.docx]

**DB69_length_447_mean_cov_4.02684563758**

AACCACACCTGACTAATTTTTTATTTTTGTAGAGATGAAGTCTCACTCTAGTGAATTTTCTTATTTTACTTTTTAGAGACAAGGTCTCA
 >chr7:138215641-138215860 + E=3e-120
CTCTGTCACCCAGGCTCGAGTGTAGTGGTATAGCCTTGGCTCACTGCAGCCTCAAACTCCTGGGAAACTGGGACTACAAGCGATCCTCC

TGACTGAGAAGCTGGGACTACAGGGCGTGTGCTGCCA|CTCC|AGTGACTAACCTCCTCCTCTGGCTCCTCCTTGCAGACAGTTATCCC
 >chr9:127641048-127641280 - E=4e-128
TTGTTTAGAACACGAATTTCCATTTACCTGGTGGGAACACGAAACAGGAGTCTCTTCTGTTCTGCAAGTTTGATGGGTAAGAGGTAGCC

TTTTTTCAAAGTAGGATTTCCTTTTTCAACTGTTCCAGGAAAGAATCTCTAAGACTGGGTAGCTCACAGCCAGCCAAAGGCAGCTACAT

TTCC
