# Supplementary material for: Chromothripsis during telomere crisis is independent of NHEJ, and consistent with a replicative origin
Source: HighWire-hosted journal article supplement (doi:10.1101/gr.240705.118), 2019-03-14
Supplement: Supplemental_file_1.zip [file contig.2.DB69_length_590_mean_cov_11.793220339.docx]

**DB69_length_590_mean_cov_11.793220339**

AGTATTTACACCAGCCCTTGGAGATTTTATTAGAATCATGATTCACAGATGAGAAATTTTCCTCTTCTACAGGATTTAGTAACTAGAGT
 >chr7:116909867-116910175 - E=1e-164
AAGAATTACTCAGCAGACTGTCTATACAGACAAATGAATTCGAATATTTCCTTTGGCTATTAACCATTCATTGGCAAATTTCTTTTAAT

TTTTCTGAACCAACGGAATGAGCAAGTCAAGATGATTCCCCTGATCTATATATTGTAGACAGATAATTAAACAGTTTCTGAAAATTATT

ATTGTTCTGTCATACAGATATGGGACTTCAACACAGCAGTG|TTCATCCCAGCTTCAGGGAGAGAAGCGAAGCAATGAGTTGAGAATCA
 >chr7:116963449-116963731 - E=5e-158
TCTCTGGATTCTTGTATCCCATGCATAGTAATCTCCTTATCCCCTGGCCCCCTTCCTCGTTTCCTCACATTGCACGCTCAGGGACTTGT

TTGCCAGCGGATGGCCTCGGCAATCCGGAACGCACGCTCCGAGAGCCCACGGATGCTCTTTGGCCTGGAGCTTCCCTAAAGGTTCCTGT

ATTCGCGTGTGCTCGTAACCATGCAGCGATGTTCCCCCTTCCCCGCCTCACCTCATC
