# Supplementary material for: Chromothripsis during telomere crisis is independent of NHEJ, and consistent with a replicative origin
Source: HighWire-hosted journal article supplement (doi:10.1101/gr.240705.118), 2019-03-14
Supplement: Supplemental_file_1.zip [file contig.2.DB70_length_266_mean_cov_3.38345864662.docx]

**DB70_length_266_mean_cov_3.38345864662**

TAGTGCTAAATTTGAAGACCCTTAAAGGTAAGGAACATGTATAATTCAGCATATTGTTTTTCAGACCCCATCATAAGGCATAGTACATA
 >chr13:70530372-70530578 + E=4e-113
GTAGACATACATATAGTAAAACTTGAGAGTTGCTCAATGCATTCACAGGACAAAGACCATTAGGCATTAATATGCTTAAATTGTGAGGC

ACCATTGACACCTAAAGGGAACCAGCAT|CCTCATGCTTCTGAGGATGACGCATGCAATAACTCCTGAATAACTTTAACTTCACCCTGC >chr13:70531151-70531211 + E=8e-25
