# Supplementary material for: Chromothripsis during telomere crisis is independent of NHEJ, and consistent with a replicative origin
Source: HighWire-hosted journal article supplement (doi:10.1101/gr.240705.118), 2019-03-14
Supplement: Supplemental_file_1.zip [file contig.2.DB70_length_485_mean_cov_22.1072164948.docx]

**DB70_length_485_mean_cov_22.1072164948**

CTCCCGGTTTCAAGCGATTCTCCTGCATCGGCCTCCTGAGTAGCCGGGATTGCGGGCATGCGCTGCCACGTCTGGCTGATTTCGTATTT
 >chrUn_gl000220:124335-124737 + E=1e-230 p=0e+00
TTAGTGGAGACGGGGCTTCTCCATGTCGATCGGGCTGGTTTCGAACTCCCGACCTCAGGTGATCCGCCCTCCCCGGCCTCCGGAAGTGC

TGGGATGACAGGCGTGAGCCACCGCGCCCGGCCTTCATTTTTAAATGTTTTCCCACAGACGGGGTCTCATCATTTCTTTGCAACCCTCC

TGCCCGGCGTCTCAAAGTGCTGGCGTGACGGGCGTGAGCCACTGCGCCTGGACTCCGGGGAATGACTCACGACCACCATCGCTCTACTG

ATCCTTTCTTTCTTTCTTTCTTTCTTTCTTTCTTTCTTTCTTTCTT|T|CTTTCTTTCTTTCTTTCTTTCTTTCTTGATGAAT|TATCT
 >chr19:46339169-46339203 - E=7e-06
TATGTTTTTTTTTTTTTCTTATTTTCTGTCGGCGTCTTGCTCT
