# Supplementary material for: Chromothripsis during telomere crisis is independent of NHEJ, and consistent with a replicative origin
Source: HighWire-hosted journal article supplement (doi:10.1101/gr.240705.118), 2019-03-14
Supplement: Supplemental_file_1.zip [file contig.2.DB71_length_378_mean_cov_4.81216931217.docx]

**DB71_length_378_mean_cov_4.81216931217**

TTCTTGCCTTCCTTCTGCACAATGTTTACAAATTCAGAACATATGCTGAAACACTCCAAATGAACTTGACTTCTGCTGCTTCTCTTTCT
 >chr3:61446491-61446654 + E=1e-83
TTGGGAAACCACCTCATTTTTTGTGGACTAGCTGGCCTCCCCTCTCATCTTGACGCCTTTCTCCAGTTGTGATT|TCT|CCAACCTAGT
 >chr3:609
GAACAATGCCAGTCTGGGACCCAAGGACTATTTACTCAACAGAAGAATTCCAACTTCAGGCAGGGGATAGGCGAAGTCCAGATAACATC
33415-60933627 + E=3e-116
TAGATATTTCTTGACATTGCATTTGATTGGAAATAAAGGAAAAGTAAAGCATTTCTGGTTAGTTTCTGTTTCTTAGTGTCTCTAGTTCC

CATTTTATTTCAATCAAAATATCA
