# Supplementary material for: Chromothripsis during telomere crisis is independent of NHEJ, and consistent with a replicative origin
Source: HighWire-hosted journal article supplement (doi:10.1101/gr.240705.118), 2019-03-14
Supplement: Supplemental_file_1.zip [file contig.2.DB71_length_428_mean_cov_39.4976635514.docx]

**DB71_length_428_mean_cov_39.4976635514**

GCCCGCCTGTCTAGATTCCTCTCGGCCTCTCTAAGCACCGAAGCACGCGCTTCTCACTTTCGTGGAAGGGGCAGGGCCCTACCCGGCAC
 >chrUn_gl000220:129128-129489 - E=2e-176 p=0e+00
GGGGGTGTCTGACAGACTGACAGAGAAAGAGACAGACATAGAAAGACAGAGATGGACAGCGAGAGATAGAGAGAAACAGACAGACAGAG

AGAGAGAGAGAGAGAGAGAGAGAGAAACAGACAGGGAGGGAGAAAGACAAATAGAGAGAGAGACAGACAGACACACAGAGAGACAGACA

GAGAGAGAAACAGACAGAAAGAGAGAGAGACGGAGAGAGAGTGAGTGAGAGAGAGAGAGAGAGAGAGGGAGGGAGAGAGACAGACAGA|

GAGAGAGACAGAGAGAGAGAGAGAGAGAGAGGGAGAGAGAGAGAGAGAGAGAGGGGGG|GGGAAGGCGGGGAGA >chr8:143968815-143968873 + E=2e-14
