# Supplementary material for: Chromothripsis during telomere crisis is independent of NHEJ, and consistent with a replicative origin
Source: HighWire-hosted journal article supplement (doi:10.1101/gr.240705.118), 2019-03-14
Supplement: Supplemental_file_1.zip [file contig.2.DB71_length_468_mean_cov_13.297008547.docx]

**DB71_length_468_mean_cov_13.297008547**

ATGTTCTATTAGTATTTGCAAAGTAAGAAAGTCAAGTCATTATGAAATGATATCCTATTAACTTACATTAATGAAAGTGACACAGCATA
 >chr8:20901471-20901900 - E=1e-224 p=0e+00
AAGTCATTCCTCTTGGTCCAGACATTGCCCCAGCCTGCCTGGTGGTGCTACCTGGTACCCAAGCACATCTCCAGCTCCCACTCTGTGCT

TGGAGGGGTGCAGTGAAGACATGGCACAGGTTCCAGGTACCATCAGCTGAAGATTCCAACCAGGTGGGAGGTAGGAGGTGGGATAGTGC

AAGGTGGGCTTGGAGGATGGTGGGGAGGAGGTGGGCTTGGTGGATGATGGGAAGGAGATGGGGTGGTGGAAGGTGGGGAGGAGGTGGGG

TGGTGGAAGGTGGGGGGGAGGTGGGGGGGTGGAAGGTGGGGGGGAGGTGGGGGGGTGGAAGGTGGGGGGG|G|GGGGGGGGTGGGGGGA
 >chr15:78285182
GGTGGGGGGGGAGTGGGGGGG|TGGA-78285219 - E=1e-01
