# Supplementary material for: Chromothripsis during telomere crisis is independent of NHEJ, and consistent with a replicative origin
Source: HighWire-hosted journal article supplement (doi:10.1101/gr.240705.118), 2019-03-14
Supplement: Supplemental_file_1.zip [file contig.2.DB71_length_476_mean_cov_6.30672268908.docx]

**DB71_length_476_mean_cov_6.30672268908**

ATGTAACCCAGCATATTTACACATTTTGGGGATTAGGACATGGGTATCCTTGGGGGAATCAGCATTCAGCCTAACACAGTATATACTCT
 >chr5:21180643-21180776 + E=2e-68
ACATTTGGGGAAGTGGGTTTTCTATAAATGCTTTCTTGTTAAAG|CATA|TATATATATATATATATATATATATATATATATATATAT
 >chr5:21183423-21183762 + E=1e-192
GCTCTTTGATGTTGATTTTGCTGTTTAAAATGGTCTAGTTGTCCTGCAGTAATAGCATTATGAATGGCTTAGAGTTTAGTAACATGAAC

AGTACCCTCAATTTTCTAAAACAAACAAAAAATATAGCTAATTAGTAAGCATAAGTAATGATAAAAGGCCAGAAATTAAGGATGATATT

AGCTAGGCTCTGTAAAAACTTTACTTCACTTTTTGCATCATTCAGAAAGAGGTTTGTGGGTTGGGCGCAGTGGCTCAAGCCTGTAATCC

CAGCACTTTGGGAGGCTGAGGTGGGGAGATCAC
