# Supplementary material for: Chromothripsis during telomere crisis is independent of NHEJ, and consistent with a replicative origin
Source: HighWire-hosted journal article supplement (doi:10.1101/gr.240705.118), 2019-03-14
Supplement: Supplemental_file_1.zip [file contig.2.DB73_length_265_mean_cov_25.6264150943.docx]

**DB73_length_265_mean_cov_25.6264150943**

TATCCCTGCAATGATCACCCAGGTGATGTACCACTTGTCAAGGCTCTGCCTACAGGGACATTGCGATGTATCTCTGCACTGATCACCTA
 >chrY:13460944-13461045 - E=1e-46 p=0e+00
GGTCATGTAACT|GAT|TGATGTAACTCTTGTCTAGGATCTGCCTAAAGGGACTTTGTGACATAACTCTGCACTGATCATCCAGGTGAT
 >chrUn_gl000216:145185-145324 - E=2e-63
GGGGCTTTTGTCTAGGCTCTGCCTAAGGGGGCATTGTGACATATCTCTGCACTGATCACCCAGGTGA|TGTAACTCTTGTATAAGCTCT

G
