# Supplementary material for: Chromothripsis during telomere crisis is independent of NHEJ, and consistent with a replicative origin
Source: HighWire-hosted journal article supplement (doi:10.1101/gr.240705.118), 2019-03-14
Supplement: Supplemental_file_1.zip [file contig.2.DB73_length_269_mean_cov_4.843866171.docx]

**DB73_length_269_mean_cov_4.843866171**

TTCTTTC|TTTTTTTTTTCTAAGGCAGGGTCTCACTCTCTTGCCCAGACTGGAGTGCAGTGGCACGATCTCGGCTCACTCTGCCTCCCA
 >chr17:67381446-67381654 - E=3e-108
GGCTCAACCTCTGCTTCCCAGGCTCAAGTGATTCTCCTGCCTTGGCCTCCTGAGTAGCTGGGATTACAGGTTCACGCCACTACCCCCTC

GCTAATTTTTGTATTTTTAGTAGAGATGGGGTTTCACC|CCAATA|TATATATATATATATATATATATATATTGGACCAA|TATATAT
 >chrX:85100494-85100529 + E=1e-06
ATTTGG
