# Supplementary material for: Chromothripsis during telomere crisis is independent of NHEJ, and consistent with a replicative origin
Source: HighWire-hosted journal article supplement (doi:10.1101/gr.240705.118), 2019-03-14
Supplement: Supplemental_file_1.zip [file contig.2.DB73_length_271_mean_cov_3.87453874539.docx]

**DB73_length_271_mean_cov_3.87453874539**

TCTTTAAAATACTTTCTGAGGCTGCAAGGGTGCAAGG|GAAG|AGAAAGAAGGGGCCATGTCCCAGGAGCCCTTGCAACTGTCATCATT
 >chr5:141328828-141328869 + E=2e-13 >chr15:70429204-70429372 - E=6e-78
AGCTCTGTCCTTGTTTGTGTTTTTATTGCCTGTCTTCCCCCTGTAAAAGAAGCCATAGGACAGAAGAGGCCTTGGCCCCTTGCTTTCCT

GCTCTGCCTCCCAGGCCCACAACATTGCC|GGGCGAGCGGTGAGGATGCAAAGAGCATGTGTAGAGGAGAAGTGCTTGTGAATTGCGGT

TTGAATC
