# Supplementary material for: Chromothripsis during telomere crisis is independent of NHEJ, and consistent with a replicative origin
Source: HighWire-hosted journal article supplement (doi:10.1101/gr.240705.118), 2019-03-14
Supplement: Supplemental_file_1.zip [file contig.2.DB73_length_283_mean_cov_3.09187279152.docx]

**DB73_length_283_mean_cov_3.09187279152**

GGAAGTAACTTAACCATGGGGAAATAGGCACGGGTACCCCGATGCCTGGCGGGGTTGTGGTTCTTTCTTTCTTTTCTTTTCTCCTTCTT
 >chr16:27899638-27899817 + E=2e-72 p=0e+00
TCTTTCTTTCTTTCTTTCTTTCTTTCTTTCTTTCTTTCTCTCTCTCTTTCTCTCTCTCTCTCTCTTTCTTTCTTTCTTTCT|CCG|TCT
 >c
CTCTCTGTCTCTCTCTCTCCCCCCCCCCCTTTCTTTTTTTTTTTTA|TTAACGCCTCTCACACTCTCACCCACGCCGGAGAGCGGTGGC
hr15:58207591-58207637 + E=7e-05
ACCATCCCACCGCACTGCC
