# Supplementary material for: Chromothripsis during telomere crisis is independent of NHEJ, and consistent with a replicative origin
Source: HighWire-hosted journal article supplement (doi:10.1101/gr.240705.118), 2019-03-14
Supplement: Supplemental_file_1.zip [file contig.2.DB73_length_287_mean_cov_20.4599303136.docx]

**DB73_length_287_mean_cov_20.4599303136**

GGGGGGGGGGGGGGGGGGGGGGGGGGGGGGGGGGGGGGGGGGGGGGGGGGGGGGT|TTTTTCAAGCAGAAGACGGCATACGAGATCATA
 >chr2:33141359-33141414 + E=1e-15
GCCGGTGACTGGAGTTCAGACGTGTGCTCTTCCGATCT|CCACTAGCCCCTGAGGTCTACCAAAGGTAGCACATGGGGAGTTCCCCTAA
 >chr1:50286738-50286844 + E=2e-52
AAAATAGGCTGATTGTGCGGTCCAGTATGCTTTTAAAAGGAATAGGTACCATGAAG|AGATCGGAAGAGCGTCGTGTAGGGAAAGAGTG

TGCCTCTATGTGTAGATCTCGGT
