# Supplementary material for: Chromothripsis during telomere crisis is independent of NHEJ, and consistent with a replicative origin
Source: HighWire-hosted journal article supplement (doi:10.1101/gr.240705.118), 2019-03-14
Supplement: Supplemental_file_1.zip [file contig.2.DB73_length_296_mean_cov_9.12162162162.docx]

**DB73_length_296_mean_cov_9.12162162162**

GTGGTGGCGGGCGCCTGTAGTCCCAGCTACTCGGGAGGCTGAGGCAGGAGAATGGCGTGAACCCGA|ATATTATAACTTACA|CGGCAG
 >chr10:17462271-17462337 + E=2e-28 >chr3
ACCATGTGTGTATAGGAAAAATACAGAGTTGAGTTCAGCATAAAATAAGATTCTACAATCCTTCGAGCCTTTTCGCTGATGTCATAAAA
:189690676-189690891 + E=2e-118
CAGACGAGCGCTCTTCAGTGGGACTCGACCTTCATAACCAGACTGAAAAAAAAAAACAAAACATGAGAAACAAATGGGTTCATTGGAGG

TCGTAAGAAAAACAGGCACTAGCTTGCATTG
