# Supplementary material for: Chromothripsis during telomere crisis is independent of NHEJ, and consistent with a replicative origin
Source: HighWire-hosted journal article supplement (doi:10.1101/gr.240705.118), 2019-03-14
Supplement: Supplemental_file_1.zip [file contig.2.DB73_length_304_mean_cov_6.56907894737.docx]

**DB73_length_304_mean_cov_6.56907894737**

TATTATATATATAACAG|AAAATATATATAATATTATATATATAATAATATATATAT|ATAATATGATAAGTTAATATTTTATAATTAA
 >chr6:48167100-48167141 + E=3e-04 p=1e-03
AAATAAAAAAAAAATATAT|AGTTTTGCTAGTATCTTCATACTTTTATGGATGAGACAGTTTTGGAGATTCTCACTCCATTATTTTCAC
 >chr3:191696232-191696430 - E=5e-108
TGATGTTCTGCATCCATCTTTTTTTTAACTTTTATTTTAAGTTCACAGGTACATGTGGAAGTTTGTTACATAGGTAAACTTGTGTCATG

GGACTTTGTTGTACAGATTATTTCATCATCCAGGTATTAA
