# Supplementary material for: Chromothripsis during telomere crisis is independent of NHEJ, and consistent with a replicative origin
Source: HighWire-hosted journal article supplement (doi:10.1101/gr.240705.118), 2019-03-14
Supplement: Supplemental_file_1.zip [file contig.2.DB73_length_355_mean_cov_4.58309859155.docx]

**DB73_length_355_mean_cov_4.58309859155**

ATGTCTATTTATAGAACCCAGAAGGCCACCATGTCCTGGGCCAAGATACATACACTGCCACAAATACAGAATCAGCAGCAACACTCCAC
 >chrX:37543572-37543892 - E=8e-182
AGAGTATTTGTGTAATGTTTTACTTGACATCATGGTTAGCTTTAAAGGAAAAATTGGTAGCTTAGAATTATTAATCAGGACACTGAATA

TTTAGCATTAGATTTTATTTTAAGGCAAAGGATTATCACAGGTTTTACATTAAGTGTACTGTACATAAATGTATTATAAGGAGGGGCAA

TAAGCCAATAAATAACATCGCTTTAAACACTATAAAGTCCAGTTTATAGCG|AA|ATTGGAGGCTTGTCACAGTTGATATAACTATGTT
 >chrX:33854806-33854843 - E=8e-08
G
