# Supplementary material for: Chromothripsis during telomere crisis is independent of NHEJ, and consistent with a replicative origin
Source: HighWire-hosted journal article supplement (doi:10.1101/gr.240705.118), 2019-03-14
Supplement: Supplemental_file_1.zip [file contig.2.DB73_length_389_mean_cov_5.01285347044.docx]

**DB73_length_389_mean_cov_5.01285347044**

CCAGGCATCAGGAGCAAGCACTTCTGAGCCTGCTAGGGCAGGGGGGCCTTCCTGGACCGCCAAGAGTTCAAGGATGCCTGAGTCTGCAG
 >chr3:191691428-191691525 + E=7e-47
CTATGGTT|AAATAAAATTTAAATAA|ACCCAAATCAATCGAGGACAATTTTTTTTTTCTTCTTTGGAAGAGCTTAGACATACTTATCA
 >chr3:190043093-190043368 + E=3e-154
TGTGTTTCTTGCTCCAGGCAGTGGCAAGATATTTTACTCTGTGACTGTCTCTTCTTAATATCTGTTGCAGCCCACTGAGGTTTTATACC

CTGGGGATTTAGAATCATGTGGCAAAAAGTTGTTGCTGTTGAGGAGGAAGAGATGTGTAAAAACAGCAAATAGCGTACTGGTTTATTCC

ATGTGCTTGTGCGACTGATGCTTGGGCTTAGCCAT
