# Supplementary material for: Chromothripsis during telomere crisis is independent of NHEJ, and consistent with a replicative origin
Source: HighWire-hosted journal article supplement (doi:10.1101/gr.240705.118), 2019-03-14
Supplement: Supplemental_file_1.zip [file contig.2.DB73_length_392_mean_cov_5.44897959184.docx]

**DB73_length_392_mean_cov_5.44897959184**

AGTTTTTGTATTTTTAGTACAGACGGGGTTTCACAATGTTGGTCAGGCTGGTCTTGAACTCCTAACCTCAAGTGATCCACCCGCCTCGG
 >chr12:93355405-93355556 - E=2e-79
CCTCCCAAAGTGCTGGGATTACAAGGGTGAGCCACCACTCCTGGCCTGTTCATCTTTTTAGA|TGAA|CACAGGGATATATTGCAATTG
 >chr12:93362202-9336
CTGTTTTCCTTCTTTTCTCCAAGAAATAATATGCTCCATGGGAACAGAGATAGTGTCTTGTTCATTGGGAGCATTCCTAGCACTGGACA
2439 + E=3e-125
TAGTGCCTGAGACTTAAACTGCTCATAACTGTTTCTTTGAAGGAAACGAAAAAGGCAGGGAGGGAGGAAAGGAGGGAGGGAGGCAGGAA

GGAAGGGAGGAAATGAATCAGCATGAGAAGATCAGGGC
