# Supplementary material for: Chromothripsis during telomere crisis is independent of NHEJ, and consistent with a replicative origin
Source: HighWire-hosted journal article supplement (doi:10.1101/gr.240705.118), 2019-03-14
Supplement: Supplemental_file_1.zip [file contig.2.DB73_length_427_mean_cov_7.29274004684.docx]

**DB73_length_427_mean_cov_7.29274004684**

TTGCTCTGTCACCCAGGCTGGACTGCAATGACACAATCTCAGCTCACCGCAGCCTTCACCTCTCAGGTTCAAGAGATTCTCCTGCCTCA
 >chr3:82289321-82289672 - E=5e-197
GCATCCCAAGTAGCTGGGATTACAGATGTGCACCACCATGCCTGGCTAATTTTTGCATTTTTAGTAGAGATGGGTTTTCGCCATGTCGG

CCAGGCTGGTCTTGAGCTCCTGAGCTCAAGTGATCTACCCGCCTCTGCCTCCCAAAGTGCTGGGATTACCAGTGTGAGCCACAGCACCC

AGCCGAGTCCTGCCCTTTTTGCTGTCTATTTAAATGCTATATTTTACCCATTTTGTGCTTTTAGTTGGTGATTTTGCTGTTTA|A|TGT
 >ch
AAGCCAATTTATTATAATAAATCTCTCTCTGTGTCTGTCTGGATATTGATATATTATTGAATTTTCCAAAATTr3:81208171-81208248 - E=8e-35
