# Supplementary material for: Chromothripsis during telomere crisis is independent of NHEJ, and consistent with a replicative origin
Source: HighWire-hosted journal article supplement (doi:10.1101/gr.240705.118), 2019-03-14
Supplement: Supplemental_file_1.zip [file contig.2.DB73_length_433_mean_cov_4.84988452656.docx]

**DB73_length_433_mean_cov_4.84988452656**

ATTTGTTACCACTGCCCTAATAACCGTGCCCTGACCTCCAGCTGCTAGAGAGAGGATGTCCCCCTAGTAAAGCCAAGCAGGAATTGAAG
 >chr19:54683354-54683468 - E=4e-57
GTTTTTCTAAATCTGCTCGGTCC|TC|CCAATAAAGTGTTGCACAAAGGCATCGTGTCCGTGCAGGTATCTGGGTTATAAACGGTGGGA
 >chr19:54676810-54677131 - E=9e-167
AGGACTTAGTCCACCAAGTCCCAGGGTGAGGTACAGCCCCCCCGCCCAGCCCAGGAACCAAACTGTCAGGCCCGGGGCACCACGGGGAC

TTCAGCTCCCAGGAGACCTTTCGCATCAGCGGCCCTGAGAAACCACAGGAAGTGTACCTTACTCCCTCCGGGCCACCTGCTGGCCAGGT

ACACACCTGCCCCTGGCCCCTCCCCTACCTGGGGCAGTGTCTGCCTGGTGGCCACCAGACACAGCCCAGCCTGGGCCAT
