# Supplementary material for: Chromothripsis during telomere crisis is independent of NHEJ, and consistent with a replicative origin
Source: HighWire-hosted journal article supplement (doi:10.1101/gr.240705.118), 2019-03-14
Supplement: Supplemental_file_1.zip [file contig.2.DB73_length_436_mean_cov_6.20183486239.docx]

**DB73_length_436_mean_cov_6.20183486239**

TTTCTTTCTTTCTTTCTTTCTTTCTTTCTTTCTTTCTTTCTTTCTCTTTCCTTTCTTTCTTTCTTTCTTTCTTTC|TTTCTTTCTTTCT
 >chr19:58938666-58938773 + E=7e-53 p=0e+00 >chr6:113730
TTCTTTCTTTCTTTCTTTC|TTTCTTCTTTCTTTTTTGACACAGTCTCCCTATGTCACCCAGGCTGGAGTGCAGTGGTGGAATTATGGC
324-113730685 - E=4e-203
AATCTTGAACTCTTGCCTCAGCCTCCCTAGTAGCTGGGACTACAGGCATGCACCACCATGCCTAGCTACTGTTTCTGTTGGATTGTTTT

TGTTTTTGTAGAGGTGGGGTCTCATTATGTTGCCCAAGCTGGACTTGAAGTCCTTGGCTCCAGTGATCTTCCTTCCTCAGGCTCCTGAA

ATGCTGGGAGTATAGGTGTGAGCCACCATACCCAGCCCTGTACAATTTTTAGATTTGAATTTGTAAAGTGTGTCTTGATGGA
