# Supplementary material for: Chromothripsis during telomere crisis is independent of NHEJ, and consistent with a replicative origin
Source: HighWire-hosted journal article supplement (doi:10.1101/gr.240705.118), 2019-03-14
Supplement: Supplemental_file_1.zip [file contig.2.DB73_length_519_mean_cov_18.0539499037.docx]

**DB73_length_519_mean_cov_18.0539499037**

GCAACCGTGGGTGGTGAGAGTCACTCTAGAGGTTTTCCTGAAACTTCTTTCATCTCTGCATTAAAAATAAATAAGTAAACCCAAATGGC
 >chr6:113730647-113731098 - E=2e-252 p=0e+00
ACAGATGTAAAAAAATTAAAAGAATAAAAACTATAAATAAAACCTTAAAATAACATGGTCTTTAATTATTTTACTTTGATTTTAAAGAA

GGACGCTCAATATTCATGGAAAGGAGAGTATATAACTCACATTTAACACATGATACTGTAAAATGGTTATTTCAGAGGCACAAAACCAA

ATCAAACCAAAGAACCACTTTCCTGCTACTTTTACTTATGCATGTGATAGAATGTGAAGAAGGGCAAGGACATTTGTAGGGCAGAGTGA

AAGTAATGGGCCTACCATACCATATTCTCTTTTTTCTTTTCCTTCCTTCCTTCCTT|TTTCTTTCTTTCTTTCTTTCTTTCTTTCTTTC
 >chr19:58938666-58938773 + E=9e
TTTCTT|TCTTTCTCTTTCCTTTCTTTCTTTCTTTCTTTCTTTCTTTCTTTCTTTCTTTCTTTCTTTCTTTCTTTC-53
