# Supplementary material for: Chromothripsis during telomere crisis is independent of NHEJ, and consistent with a replicative origin
Source: HighWire-hosted journal article supplement (doi:10.1101/gr.240705.118), 2019-03-14
Supplement: Supplemental_file_1.zip [file contig.2.DB73_length_521_mean_cov_6.50863723608.docx]

**DB73_length_521_mean_cov_6.50863723608**

CCTCATGGCACAGTGAACTTTTGGTTTAACTACTGGAATGTTCAGTCAAAACCAACATGTTGCACACTCAGCTTTTTTTTTTTTGAGAC
 >chr5:41353123-41353329 + E=1e-102
AGAGTCTCGCTCTGTTGCCCAGGCTGGAGTGCAGTGGCGCGATCTCCGCTCACTGCAAGCTCCACCTCCCGGGTTCATGCCATTCTCCT

GACTCAGCCTCCCGAGTAGCTG|G|AAAATCTGTCACAGTTGACTTTAATTAGTTGGTCTGTGGGGGCTCAGTTGCTCAAAGGAAGAAA
 >chr5:41333088-41333409 - E=1e-181
GATCCATGATCATTATTTTAAACTTTGCAGATCAATGAAGCCTTCATTTCTTAGGCTGGGTTGGGACGGGCAGTCACAAGCCATTGACG

TTTTTGTTTGTTTGTTTGTTTGTTTGTTTTTGTCTTTTATTTTATATTATTTTATTATTATTATACTTTAAGTTCTAGGGTACATGTGC

ACAATGTGCAGGTTAGTTACAAATGTATACATGTGCCATGCTGGTGTGCTGCACCCGTTAACTCGTCATTTAGCATTA
