# Supplementary material for: Chromothripsis during telomere crisis is independent of NHEJ, and consistent with a replicative origin
Source: HighWire-hosted journal article supplement (doi:10.1101/gr.240705.118), 2019-03-14
Supplement: Supplemental_file_1.zip [file contig.2.DB73_length_525_mean_cov_9.24761904762.docx]

**DB73_length_525_mean_cov_9.24761904762**

GTCTCTAACCAACTGGTTATTTCTCCTTTTCTGCCCAAGACTAATGCCCTTCCAGATGAGGATCTTCACCTCAGTCATCACATCCTCTC
 >chr16:71981077-71981297 - E=9e-118 p=1e-02
TCCCAGTGCTTCATCTCTCCCCTGCATTTTATTTAATTTTATTTTTTTGAGACGGAGTTTCACTCTTGTTGTCAAGGCTGGAGTGCAAT

GATGTGATCTCAGCTCACTACAACCTCCACCTCCTGGGTT|CA|GAGGAGAGGATTGTGGAAACTACAATTCAAGATGAGATTTGGGTG
 >chr16:71989299-71989606 - E=4e-170
GGGATACAGCTAAGCCCTATTAGGTGTAGTGGTGTGCACCTGCACACCACTGAGGTGGGAGGATCACTTGAGCCAGGGGGATGGAGGTT

GCAATGAGCTGAGATCTCACCACTGCACTCCACTCCAACCTGGGTGACGCAGCAAGATCCTGTCTCAAAAACAAAAAACTAAATGATAT

TCTGTTATGTGTGTGTGTTTATATACACCCCTTTTTTTGTTTGTTTTTTAGATGGAGTCTCTCTGTAGCCCAGGCTGGAGTG
