# Supplementary material for: Chromothripsis during telomere crisis is independent of NHEJ, and consistent with a replicative origin
Source: HighWire-hosted journal article supplement (doi:10.1101/gr.240705.118), 2019-03-14
Supplement: Supplemental_file_1.zip [file contig.2.DB73_length_527_mean_cov_12.4667931689.docx]

**DB73_length_527_mean_cov_12.4667931689**

ATGACGTATCTTCTTGTATTTGCTTCCAGGGAATCATGCTTGTTGGTGATGGATACAGAGGAAAAACTTCACCCCATACACCCAATGAA
 >chr3:189691475-189691822 - E=3e-176 p=0e+00
AAGTTTGAAGGTGCAACTGTCCTGAAAGCACTCAAAGTAAAGTCTTAACTTCTTTTGGGTTTGAGTTCCTTAGTGTCAGCCTAAGGCTT

CTGTAAATGGCAGATATAAGAAAGAAAAAAGTGGCCAGGCACAGTGGCTCACGCCTGTAATCCCAGCACTTTGGGAGGCCGAGGCGGGC

GGATCACGAGGTCGGGAGTTCGAGACCATCCTGGCTAACACGGTGAAACCCCGTCTCTACTAAAAATACAAAAAAATTAG|TTGAGTGT

GGTGGGCACA|TGTAATCCCAGCTACTCGGGAGGCTGAGGTAGGAGAACCACTTGAACCTGGGAGGTGGAGGTTACAGTGAGTCAAGAT
 >chr7:2897650-2897808 + E=2e-42
TGCACCATTGCACTCCAGCCTGGGCAACAAGAGGGAAACTCCGTCTCAAAAAAAAAAGAAAAAAAGAAAGAAAAGAAAA|GCAAA
