# Supplementary material for: Chromothripsis during telomere crisis is independent of NHEJ, and consistent with a replicative origin
Source: HighWire-hosted journal article supplement (doi:10.1101/gr.240705.118), 2019-03-14
Supplement: Supplemental_file_1.zip [file contig.2.DB73_length_571_mean_cov_4.72854640981.docx]

**DB73_length_571_mean_cov_4.72854640981**

TATTGTTAGGAATGTACCATAGTAAGATATATTAAATTAAGTATGGAAAAAAAGATGGCATCCTAGGGACTATCCCAAGGTAGGTTAAA
 >chr4:91647550-91647874 + E=2e-183
CTTTAGAGATACATGAATTTAAAATGGCAGTTCAGTCTTGTTTGGGATCAAATGTTTATTTTTTCCAATATGGCAGCATTTTTCAACTT

TGTTAGTATTGGAGCCCATTCTTTCAATTAATTAAAAACGATCTGCCCTGAAAGATAGTCTAAGCCCCACATACATACTCACTTCTCTA

TTCCCCCACACTATGGTTCAGTTCCTGCTAATCTCAAATTTACTGTTTAAAA|ACCAT|AATGACTTCCAGCTCCATCCCTGTTGTTAC
 >chr4:91653964-91654216 + E=6e-140
AAATGATAGCATCTAATTCTTTTTTATGGCTGAATAGTGTTCATTGTGTATATGTATCACATTTTCTTAATCCATTCATCTGTTGATAG

TCACTTGGATTATTTGCAAATCTTGACTGCTACGAATAGTGCTACAGTAAACATGGGAGTGCAGATATCTCTTCAATACACTAATTTCC

CTTCTTTTGGGAATATATCTAGCAGTGGGATTGCTGGAT
