# Supplementary material for: Chromothripsis during telomere crisis is independent of NHEJ, and consistent with a replicative origin
Source: HighWire-hosted journal article supplement (doi:10.1101/gr.240705.118), 2019-03-14
Supplement: Supplemental_file_1.zip [file contig.2.DB73_length_588_mean_cov_6.80612244898.docx]

**DB73_length_588_mean_cov_6.80612244898**

ATATGCAAGGACATTTGCCACTTCTACTCTTCTAAACCCAATTTATCAATCTGCCAGTCCATTCCCAATGTCATCCCAGAAACTCATAG
 >chr16:59291572-59291904 + E=4e-185
AACACTCCTCAGAACACTTGTCAAATGCTTTTCCTGCATCTATCGAGATGATCATTTGATTTATGTCTGTTATTTTATTAATATGGTAT

ATTACATATTGAGATTTGAACGTCAAATCAACCTTATATTTCTGGATAAGCCCAACATGGCATAGTGTATAATCATTTTTATATGTCCC

TGAATTCAGTTTGTGATTGTTAAGTATTTTTGTGGTTACGTTCATAAGAAATATGGATTTTCTT|T|CTGATTCTTCTAAAGAGTTATG
 >chr16:59286728-592869
TATTTCTGAGATGAGTTTTTTTTATTTGTTGATTGCCAACAAGCTGCAAACAATAATATGTAAAGACACCTGAGTTAATTTGAGTGGCT
85 - E=6e-143
TTTCCAGGGCTTCTCAAGCTTTAATGTGCATATGGTTCACCTGAGGATTGTGTTACACTTCAGATTCTGATTCAGTAGGTCTGGAATGG

GACCTAAGAGTATGCATTTCTGATAAGTTGGTCTGCTGTTGATCAGCTCACAAGTT
