# Supplementary material for: Chromothripsis during telomere crisis is independent of NHEJ, and consistent with a replicative origin
Source: HighWire-hosted journal article supplement (doi:10.1101/gr.240705.118), 2019-03-14
Supplement: Supplemental_file_1.zip [file contig.2.DB73_length_597_mean_cov_8.18425460637.docx]

**DB73_length_597_mean_cov_8.18425460637**

G|CAGGTGTACAAGGCTATCAAATTTATTGAATATCGTTTAGGTAGATCATTCAGTTCCATTACTCTATTAATACTGAAATTCTGTAAC
 >chr3:82280132-82280641 + E=6e-292 p=1e-02
TGTACTGTGAGACATTTGTCTAACATTGACTTCTTATTGGCAGATTCAATACCTGTTGACTTACGATAAATTTTAAGGTTTGCAGATTG

TTGAATATGTCTGAAAGTTCTTTGAGAAGAAGAATATTAGGAAACAGCTGAAGTGCTTTTAAACTATGATACAGTCTTTTGGCATGCTA

ATGAATTGAACTAGAAAACTCGTTTGCATCTTAAAGCCACAAATCATAAACTGTGAATGAAAAACCAACCATGAAGGAAAAAAAATTGG

TGTGTTCTGTTATAAGTTAGTATGAAAGTCTACATTTTGTCTAGTGATAAACAACACTCACTGCAGATACTTCAGGTTAGACCAGATCT

GGTCTGAAAGCTTAGCAGATTGCACTCTAATGAGGGATTCTGGGGAGATGATTAGCTATAAGGACA|ACATCAAG|CCACTTGGTCCAG
 >chr3:802978
AGCTGAGTTCAAGTCCTGAATATCTTTGTTAATTTTCTGTCTCAATGATCTGTCTAACAT|CCTGAA45-80297918 - E=3e-32
