# Supplementary material for: Chromothripsis during telomere crisis is independent of NHEJ, and consistent with a replicative origin
Source: HighWire-hosted journal article supplement (doi:10.1101/gr.240705.118), 2019-03-14
Supplement: Supplemental_file_1.zip [file contig.2.DB73_length_601_mean_cov_8.70549084859.docx]

**DB73_length_601_mean_cov_8.70549084859**

TTTTTTGTTTTTGTTTTTGTTTTTCTTCAAAATTTTTCATAGTCAGCTACAAAAGTATCTCAAATACCACATTATAGAAAAAAAAACAA
 >chr3:192466085-192466377 + E=3e-159
AAAAACACTTTCTGGTTTCATCAAATCCTTTTTACTCTTTGAAGAGTGTGATTTGGGGAAAAAAAAAACTCTATCAAGGACTATTTGTT

GAATGAGTGGTCCCTTCTAATTATTTATATTCTTAATCACCCCACAGTGAGCTTTTGGAGGAAGGTGGCCCTGTCATCTCTGGGTCTTT

CTCAAAAGTGAGAAAAAGTGATAA|AATACTTTTGTATTATATATATAATG|AGAAAATTGAATCTATTATTTTTTTCAAATACAGAAA
 >chr3:192984567-192984851 - E=3e-159
AGCACAAAGAAGAAAAAAAGATGAAATCATAATCCTACCCTTCTCACCTTTTTTATGCATTACTAGTTTTTAAACTTGGGAAATACATA

GCCATTCCCAAGAAAACATTTCTAAGCTCAAGGGCCCTAAGCTTAAAGGGATTCAAAAAACTAATCTAATATTAGCTATTATTAGTAGT

AATACTATTAGTTATTGATAGTAATATATAATCCAGTTGCTGCTAGATCAAGATTTTATTGACTATGCT
