# Supplementary material for: Chromothripsis during telomere crisis is independent of NHEJ, and consistent with a replicative origin
Source: HighWire-hosted journal article supplement (doi:10.1101/gr.240705.118), 2019-03-14
Supplement: Supplemental_file_1.zip [file contig.2.DB73_length_609_mean_cov_13.6962233169.docx]

**DB73_length_609_mean_cov_13.6962233169**

CCTGGGATCTCGCCACACCAAAAATTAGATTATGGTCCTCTTCAGCCTGAAGAGACTCACCATGGCTTAAGAAGAAACAAACCTCAGAA
 >chr7:75976072-75976347 + E=9e-154
GGCCCTTCGTGAACTGTTTCCTGTTAACCTCTTTCAACTCATTTCCTGCTACTCCCTCAAAAAGCGCACCACCACAGCATTCCCTGAAT

GCCACCAACAAGGACTAAACAAATCACGCCACCAGTTCTCCTTTTCCATCCTGAAACTAAGCGTCCTATGCCCTCTGCCTGGCTATTCC

TTCCTC|CA|CCATGCCCAGCTAATTTTTGTATTTTTAGTAGAGATGGGGTTTCACCATATTGGCCAGTCTAGTCTTGAACTCCTGACC
 >chr7:75968328-75968653 - E=1e-173
TCAGGTGATCCGCCCACCTTGGCCTCCCAAAGTGGGAGGATTACACTGGGATTACAGGCGTGAGCCACCGCGCCCAGCCTATTACCATT

ATTTTTATACAACTAAGTTAAAACACACAGAAAGCAAAGAAGTGTGGTTTGAGTTTGTTGTATACATCCATAAACTGTTTATATAAAAT

TACTGGCTTTGGGCTTTTCTGAAAACTTGGCTTTCAAGATTGGCTTTAAGCTTCAATTGTAGGTATGAATAACAGGG
