# Supplementary material for: Chromothripsis during telomere crisis is independent of NHEJ, and consistent with a replicative origin
Source: HighWire-hosted journal article supplement (doi:10.1101/gr.240705.118), 2019-03-14
Supplement: Supplemental_file_1.zip [file contig.2.DB73_length_622_mean_cov_6.27009646302.docx]

**DB73_length_622_mean_cov_6.27009646302**

AGGATTAAGAGAGTAGTTGAAAATTTAGAAGGGAAAGATGATAATTGATACAGCAAAGTTTTTGAGGAGGCAAGTGATAGAGTGTAGTG
 >chrX:37581602-37581961 + E=2e-204
CAGGTGGGGAGATCCCGGCTCCAGATCGTAAGAAAGACTCTTTGTTCACTGAGTTGAAAGAAAACAGATAAAAATTACTGTCTCTCAGA

AATCTGTTGAAAATTCTAATTTTCAGAAGCTTGCTTTGCTAACTTCCTCCAGTTTCCCTCTGCCACTGCACTCCATATCCCCTTTGGCT

TCGCCAGTTACCTCTTTGAAGTCATTCACTAATTTTTTTGAAAAGTCTATTCCATAAAAGCATTTCATGAGTTCAGTCATTTTACTG|A

AGAT|CGTCTCTAGGAACCTGTCCTTACCTCCCAGAAAAACTGCCTACAAAATATATTCCTCTGTAACTGTAAGTAATTCAGGGCAAAG
>chrX:37544195-37544463 - E=1e-149
ATCAGGGCCTAATAAGGAAGTAGTTTTTTTTATTCCAAGACAGACCTCTGCTTATTGGTGTGCCAATACCAAGACTAACACAACTCCTT

TTAGCCCATTGAACTTTCCACCATCTTCTTGATATCAGGATGTACTCAGTCCACCCCCGTCCCTCAGACCTCGATCAAGTCACTAAATC

T
