# Supplementary material for: Chromothripsis during telomere crisis is independent of NHEJ, and consistent with a replicative origin
Source: HighWire-hosted journal article supplement (doi:10.1101/gr.240705.118), 2019-03-14
Supplement: Supplemental_file_1.zip [file contig.2.DB73_length_766_mean_cov_7.82637075718.docx]

**DB73_length_766_mean_cov_7.82637075718**

TGATTAACAAAGTGTTTTCACATCTATTGTGGCCTCTCATAAATCCTGGACAAAAATTAGGGTAAGCATGTTATTCCTGTTTGTAGAGA
 >chr1:50286357-50286672 - E=1e-177
AGGAAGTTGAAGAAATTAAGATTTAGAGAAGTTGTGACTTGACTAAGTGCGCTTAACTAATAAGTGGCAGAATCTGGAGTTCAGCCCAG

GCCTACCGGACCTCAAAACCTGTTCTTATACATCTTAGTTAACTTTTGGTTATTCAGCATTTATATGTTTATTTCCTGGCTCATTATTA

GCAACTAGAGCATTTCCAAGTTGAAGTACAAGCTAATAACCAG|TCTGA|ATCCTGAAAGCATACTCTAATTATGATGGTATTATTCTG
 >chr1:50281492-50281948 - E=1e-262
GTTGTATCTGTAAAGTAGTACTAGTGAGAGTTAAGGGTGGTAATGATAAGAGCTGAGCATGCTGCCTCAGGTAATCTCAATGACTCAGG

AGCCTGAGGCAGAAGGACCACTTGAGTCCAGGACTTTGAGACCAGCCTGGGCAACATAGCAAGACCCCATCTCTTAAAAAAATACATAG

CCAGGCATGGTGGCATATGCCTGTAAACCCCAGTGACTGGGGAGGCTGATGGGGGAGGATTGCTTCAGCCTAGGAGCTTGAGGCTGCAG

TGAGTCATGATCCTGTCATTGCAATCCATCCTGGGCAACAGAGTAAGACCTCCCACTGAAAAAAAAGATGGTAATGATTGAAATTAGGT

GAGTGTTTCCCTACCTAAGAAACAGCTAGTTTTCAAAAGACTTGAATAGACATTTC
