# Supplementary material for: Chromothripsis during telomere crisis is independent of NHEJ, and consistent with a replicative origin
Source: HighWire-hosted journal article supplement (doi:10.1101/gr.240705.118), 2019-03-14
Supplement: Supplemental_file_1.zip [file contig.2.DB73_length_1048_mean_cov_6.82442748092.docx]

**DB73_length_1048_mean_cov_6.82442748092**

CACATCCCTTTTAAGTTGTATTCCTAGGTATTTTATTCTTTGTAGCAATTGTGAATAGGAGTTCACTCATGATTTGGCTCTCTGTCTAT
 >chr21:26809934-26810233 - E=8e-168
TATTGGTGTATAGGAATGCTTGTGATTTTTGCACGTTGATTTTGTATTCTGAGACTTTGCTGAAGTTGCTTGTTTGTTAGCTTAAGGAG

ATTTGGGGCTGAGATGATAGGGTTTTCTAAACATACAATCATGTCATCTGCAAACAGAGACTATCTGACTTCCTCTTTTCCTATTTGAA

TACCCTTTATTTCATTTTCTTGCCTGAT|TGCC|GTCTCACTGCACCTTGCCCGGGGCCGGCATCACCCCTTTTTCCTGGTGATCCACG
 >chr21:26746106-26746859 - E=0e+00
CTGAACATGCTCCCCATCTGTGAGTCACCTGGTAGCCTTCTAGGTTACCAGATCAGCTGCGGGGATATTGCAGTGCTGGTGTTCAAGTA

ACCCTTATTTTACATCGTAATGGTCCCAAAGCCAAGAGTAGTGAGGCTGGCATGTTGTTATAATTGATTATTAGTTATTGTTGTTAAAC

TCTTATTGTGCCTAATTTATAAAATAAACATTTTTGTAGATATATACGTACAGGAAAAAGCATCACGCATACAAGGTTTGTGCTATCTG

TGGTTTCAAGCTTAGGGGTTTGGAACGTACCCCTTGAACGTAAGTAGGAACTACTGTGTTCGATTGCGTGCTCACAAGGAAAGAAAGGG

AAGAGATTGACAGAGACAGAATGAATTCTGGAAAGTCAGATTTGCCTGGGTCTGCTTAAAAGTAGGGGGAAAAAGCAGAGAGCTCTCGT

GGATACTCCTTAAGGTACTTAGTATAATGTGCCTACGATCATCTCCATTTCTGACAACCAGCAACTTCTTTCTTGTGGAGGAGTTAAGA

AGTGGTGGGTGAGGAGCAGAAGTGGGTGGGGAGAGAGGCTGGAAGTGAGAGGTCCCAAAATGCATCCTCCACTCTGGGCATAGGTAGTA

GTGTGAGGAGAGGAGGGGGAGGGGAAAGGGGAGGGGAAGGAGGGGGAGGGGAAAGGGGAGGGGAAGGAGGA
