# Supplementary material for: Chromothripsis during telomere crisis is independent of NHEJ, and consistent with a replicative origin
Source: HighWire-hosted journal article supplement (doi:10.1101/gr.240705.118), 2019-03-14
Supplement: Supplemental_file_1.zip [file contig.2.DB75_length_271_mean_cov_8.30258302583.docx]

**DB75_length_271_mean_cov_8.30258302583**

CATTTGATTAATGTTTGTTGAGTTCTTAAAAACATATTTTTCTCTTAACAGTACTGGCACAATTTCGGTATT|GTG|AAAAGTGGAGAT
 >chr13:63637829-63637902 + E=8e-25 >chr7:57606
CTGCTTTTTCTTTCTTCTTTTCATTAATCTCTATTTGGAGAAACACTGGTCTTGGAAATGAATTGAAAAGTAACATGACCTTAGACAAA
289-57606483 + E=8e-92
TCAATTAAGTTTCTTGACCCCAGACTTTTTTTTTCATCTGTATAATGCTATTTTTACTAAGGATTTATTAATGTCCTTCCAGCTCTGAT

ATTTTC
