# Supplementary material for: Chromothripsis during telomere crisis is independent of NHEJ, and consistent with a replicative origin
Source: HighWire-hosted journal article supplement (doi:10.1101/gr.240705.118), 2019-03-14
Supplement: Supplemental_file_1.zip [file contig.2.DB75_length_293_mean_cov_8.69283276451.docx]

**DB75_length_293_mean_cov_8.69283276451**

CAGCTTTACCTCTCATAAAACAATGTTATGAAAATTTCCAAATATTTACAATGCCAGACAAAGCCCTACATGATCTGGCTTCTACCTAC
 >chr2:124191631-124191778 - E=3e-68 p=0e+00
CACTCCATCTTCCTCTTGCACTAAAACACATCTCTCTCTCT|CACACACACACACATAC|ATATACACACACACACTTAACCAAGGAGG
 >chr4:153746131-153746297 + E=2e-78
CAAAAAATCTTCACAAGGAGAACTACAAAACACTGAAAAAAATAATAGATGACACAAACGAATGAAAATACATTCCATAAGAATCTGTA

TTCTGAAAACGACCATACTGCCCAAAGA
