# Supplementary material for: Chromothripsis during telomere crisis is independent of NHEJ, and consistent with a replicative origin
Source: HighWire-hosted journal article supplement (doi:10.1101/gr.240705.118), 2019-03-14
Supplement: Supplemental_file_1.zip [file contig.2.DB75_length_363_mean_cov_2.06611570248.docx]

**DB75_length_363_mean_cov_2.06611570248**

TTGCATGTAAGTGTCTACGATGAAATTAAGATGTTTATCTTTACAGAGGTACATAA|TTTT|CTAGATGTCAGGTAATTTACCAGAAAG
 >chrX:89601962-89602022 + E=1e-24 >chrX:89600688-89600995 - E=8e
AGTTGTTTTCTGATCATAACTCTCCTGATGAAAATGGAATCTGGTCCAGCCAGAATGAAGAAACTGACAGACGATGATGATGAAAGCAA
-174
TCCCCAGCTGTCCACATTGCTCATTAGCATAAGACACTCCCACCAGTGCCATCACAGTTTGCAAGTGCCATGGCAACAATTCAGAACTT

ACCACCACTTTCCATAGCAATTACCTAGAAGGTTCCAAACCTTTCCTGGAAAATTCTAAATGACCCGGTCCTCAATTTGCATTGACCAC

CCCTTAATT
