# Supplementary material for: Chromothripsis during telomere crisis is independent of NHEJ, and consistent with a replicative origin
Source: HighWire-hosted journal article supplement (doi:10.1101/gr.240705.118), 2019-03-14
Supplement: Supplemental_file_1.zip [file contig.2.DB75_length_486_mean_cov_7.40740740741.docx]

**DB75_length_486_mean_cov_7.40740740741**

CATTCCAGATCTCAGATGTTTTCAGGACAACCCTCTCACCTAGTGAAACAGATTGTATGTTTTTTCCACTGTGGCTTGCTCCTATTTAT
 >chr4:33836107-33836237 - E=2e-50
TTCTATTTCCTTCAGCCCAGAAAGGATTATTGTAATAT|TGATATATTGATGTATTATTGATGTATAATTATGATATATTGATGTAATA

TTGATATATTA|CATCAGCATTTTTTAAATTCTTACATTAATCTATTTAAATTGAGGTCCTATTTTACCTCAAAGATATCTATTACCTG
 >chr7:57606809-57607113 - E=7e-130
TATTTATCTATCCAATCGAGTTCGTGCCACATATATTTTTTTTAATTCTGCAATTCCTCTGAAGTTTTTAAGATCTTTTCTTGCTGGTT

AGAATAATCCTCAAGTTTTTCTAATCATAGCACTTTTATTTTCTCATTCTTCCGATTGAAATTCTATCCTCTTCATTTACAAAGGTGAA

TATATTTGGAACTGTCATCTCCAATGAAAAGCAATTAGAAACC
