# Supplementary material for: Chromothripsis during telomere crisis is independent of NHEJ, and consistent with a replicative origin
Source: HighWire-hosted journal article supplement (doi:10.1101/gr.240705.118), 2019-03-14
Supplement: Supplemental_file_1.zip [file contig.2.DB75_length_489_mean_cov_6.30470347648.docx]

**DB75_length_489_mean_cov_6.30470347648**

TTTTGATTCATAAAAGAGTTTCATTAATACTAGATATTTCAGGAAATTATCCTTGACTAATACGAGGGATGGAAGGAATGGGGGAAAAC
 >chr7:126708015-126708230 - E=8e-118 p=1e-02
TCAAGGCTCACCATATCATGGTAAATTATTTATTTATTGTTTATTTAGTGGGAAAGGATCTGCTCTGTTGTGTGCTTTCACTGGTCTAA

AGGGATTTGGCACAGTTACCTAAATAGGTGTAATTAT|TGTATTACCTGACATAGTGCTGGCCCATAGTTAAATACATGAATTCATGAA
 >chr7:126735851-126736125 - E=2e-153
ATACCAGTCAGAAATGGCTCACCAAATCTGCTTGCTTCCTTTTTCATTTTGAATCTTCTTAAGAATGAATCAATTCAGTGAGCATTTAT

AGTGCATGTGTCAGGTGATACTTGTGCTGGGCTTTGAGGATACAGAGACAAATCATGGTCTTTGCTTTCCAGCAGGTCACTGTGTTTCA

GAGGAGGTGGAGATGCAAACAATTACAAATTCATGTGATCTTTGC
