# Supplementary material for: Chromothripsis during telomere crisis is independent of NHEJ, and consistent with a replicative origin
Source: HighWire-hosted journal article supplement (doi:10.1101/gr.240705.118), 2019-03-14
Supplement: Supplemental_file_1.zip [file contig.2.DB75_length_519_mean_cov_6.71098265896.docx]

**DB75_length_519_mean_cov_6.71098265896**

GTAAATTAGTTCAACCATTGTGGAAGACAGAGTGGCAATTCCTCAAGGATTTAGAACTAGAAATACCATTTGACCCAGCAATCCCATTA
 >chr10:85605083-85605430 - E=2e-197
CTGGGTATATATCCAAAGGATTATAATTCATTCTACTATAAAGACACATGCACACGTATGTTTATTGCAGCACTATTCACAATAGCAAA

GACTTGGAACCAACCCAAATGCCCATCAATGATAGGCTGGACAAAGAAAATATGGCACATATACACCATGGAATACTATGCAGCCATAA

AAAAGGATCAGTTCATGTCCTTTGCAGGGACATAGATGAAGCTGGAAACCATCATTCTAAGCAAATTATCACAAGGACAG|G|ATATAT
 >chr1
ATATATCTTAGTTTCATTGAATTTTTTCCATTTATTGGATTTGAATTTCATTTCATTGAATTTTTCCATTTATATATTCTTTATTTCAT
0:85604149-85604320 - E=3e-88
TTATTTCTGTGCTAATCTTTCTTACTTCCCTCCTTCTGATAACTTTGGGTTTAGTTTGTTCCTCATTTTCTAGTTC
