# Supplementary material for: Chromothripsis during telomere crisis is independent of NHEJ, and consistent with a replicative origin
Source: HighWire-hosted journal article supplement (doi:10.1101/gr.240705.118), 2019-03-14
Supplement: Supplemental_file_1.zip [file contig.2.DB75_length_575_mean_cov_4.92869565217.docx]

**DB75_length_575_mean_cov_4.92869565217**

ATGTAAGCCAAAAAAATCTAAATACAATTTTATATTTGACAGTGCTTCTTGTATAATTTTAACATGCCAAATAAGCCAAGTATGTCTCT
 >chrX:113235201-113235520 - E=3e-177
CTTGGCCTTCTGAAAAGTTAGTTTTAGGCCAAGAGACTGAATTTACAATTTGATTTTTAGAAAGTTTGGCAAATATCAAAGGTTCAAAA

CACTCGATACCACAAAATGGAATTACAGGTCACTCACTGTGATGGTTAATACTGAGCATCGACTTGATTGGATTGAAGGATACAAAGTA

ATGATCCTGGGTGTGTCTGTGAGGGTGTGGCCAAAAGAGATTAACATTTGAG|GTAACAAAAAT|TGTGTGTGTGTGTGTATATATATA
 >chrX:89601031-89601276
TATATATATATATACTGTTTAGCCATATACAGCCATGTGCCATATGACAACATTTTCATCAAGGTCAGACTGATGTGGTAGCTTTCATA
 + E=1e-126
ACATTGTAGCCCAACACAATGGGCTTATTCTGTTTAGATTTATTCTGTTTAGATATCTTGCATACACAAGTACCATTACATTACAATTG

CCTACAGCATTCAATGCAGTAACCTGCTTACCAAGTTTGTAGA
