# Supplementary material for: Chromothripsis during telomere crisis is independent of NHEJ, and consistent with a replicative origin
Source: HighWire-hosted journal article supplement (doi:10.1101/gr.240705.118), 2019-03-14
Supplement: Supplemental_file_1.zip [file contig.2.DB75_length_647_mean_cov_8.114374034.docx]

**DB75_length_647_mean_cov_8.114374034**

TGGGCAAGTTTATCCTATTGATTTTGAAAGAAATACTTAGAAAAATATTGCTTCTACCAATGCTATTTTTCAGGTTTGTGCTGATAGTG
 >chr3:54374126-54374306 + E=1e-96
TTCCCTACTCACAACATTTTATTATGAAAATATCCAGACATGCAACACAATTGAAACAAATTTGCCACACAAACACCCATACACCCCCC

AT|ACA|CCCCTTGTCCCCCTCGCAGGGCGTGCGATGGGGGTGTGGCTCGCTTCTTCACTGCCTTGTTGCTCAAACCTCTAGGGGAGCA
 >chr3:54237268-54237732 + E=1e-264
TACAGATGGGCAGGCTGTGGGGCTCTGACTCCATGGCGGTGTCTAGGGGTGAATGTTTACAGCTCCTGAAGCCCTTGTGGGTGTGTGTT

ACAGGGTGCTCCTTTAGTTTGTCATCTGTAGGCAGCTTGTGTTAGCTCAATTAGACCCTCTACCTTGTTGCAAGGACAAAGGGCTTTCT

GTATCCCGGGTTCTTGCCTTGGTATACTGGAAGAATCTGATCACACATGAGCTTGGAAAATGAGGGCAAAGTTTTATTGAGTGGAAGCA

GCTCTCCGCTGATGGGGAAGCCAGAAGGGAGATGGTTTTCCTCTGGAGTTGGGCCACTGTGTGGCCCCAGTTCTCCTTCAACTCCCTCG

GCCAAACTCCGTCTCATCCCGCTGGT
