# Supplementary material for: Chromothripsis during telomere crisis is independent of NHEJ, and consistent with a replicative origin
Source: HighWire-hosted journal article supplement (doi:10.1101/gr.240705.118), 2019-03-14
Supplement: Supplemental_file_1.zip [file contig.2.DB76_length_282_mean_cov_15.1489361702.docx]

**DB76_length_282_mean_cov_15.1489361702**

TCATCACTGCAGAAGATGAAATAACTGTTTAACCTGGTCATGATGAACCATTTAGCTGAGATTCCCCAACCTTACACCAAGCCATTCTA
 >chr12:65211782-65211950 - E=4e-79
AGATTTTTTTTTTTTGGTAGAGTCTCACTCTGTTGCCCAGGCTGGAGTACAGTGGAGGGATGTCGGCTCA|CTG|GGTTTCAGTTTCCT
 >chr12:65211032-
CATCTTTAGAATAATGATATTTGAGTTACGGTGAGAATTAAATGACATAATGAAAGTCATGGCATAAAGCAGGCGCTCAATACTGTCCT
65211155 - E=9e-63
TTGATTAGTGCTTGTTG
