# Supplementary material for: Chromothripsis during telomere crisis is independent of NHEJ, and consistent with a replicative origin
Source: HighWire-hosted journal article supplement (doi:10.1101/gr.240705.118), 2019-03-14
Supplement: Supplemental_file_1.zip [file contig.2.DB76_length_313_mean_cov_8.70607028754.docx]

**DB76_length_313_mean_cov_8.70607028754**

AAACACAAAAAAAA|AAGACACACACACAGAGAGAGAGAGAGAGACAGAGACAGAAAGAAAGACAAAGACAGAGAGAGAGAGAGAGAGA
 >chrUn_gl000220:136186-136265 - E=4e-33 p=2e-02
GAG|AG|CAAAAGTAGACGTGTTTTAGGTCTTCATGAGCTTAGTCAAGTGGAGCATGCCAATGGCAAACAAATCAATATGTGATTACAG
 >chrX:96866346-96866572 + E=2e-113
TTGTGTTTAGTGCCTTAGAAGGAAAGACTGCAGATATTGTAGGAGAAAATAATGGTGTGAGAGAGAGTGTGTGTGTGAGTGTGTGTGTG

AGTGTGTGTGTGTGAGTGTGTGTGTGTGTGTGTGTGTGTGGTGGAAAGG
