# Supplementary material for: Chromothripsis during telomere crisis is independent of NHEJ, and consistent with a replicative origin
Source: HighWire-hosted journal article supplement (doi:10.1101/gr.240705.118), 2019-03-14
Supplement: Supplemental_file_1.zip [file contig.2.DB76_length_379_mean_cov_20.018469657.docx]

**DB76_length_379_mean_cov_20.018469657**

CTACTAAGCCAAAATACAAAAAATTAGCCAGGCGTGGTGGCGGGCGCCTGTAGTCCCAGCTACTCAGGAGGTTGAGGCAGGAGAATGTT
 >chr15:30373566-30373793 + E=5e-112
GTGAACCCGGGAGGCGGAGCTTGCAGTGAGCCAAGATCGCGCCACTGCACTCCAGCGTGGGTGACAGAGCGAGACTCCATCTCAAACAA

AAAAAAAAAAATGAACATGTCATCCATACTTCTAAGGTGTT|TTG|AAGGATCAATGCAACAAGAAGAGCTTACTATCCTAAATATATG
 >chr15:30313327-30313484 + E=5e-83
TGTGCTCAATATAGGAGCACCCAGATTCATAAAACAAGTTCCTAAAGACCTATAAAGAGACTTAGACCCCCAAATAGTAATAGTGGGAG

ACTTTAACACCCCACTGTCAATATT
