# Supplementary material for: Chromothripsis during telomere crisis is independent of NHEJ, and consistent with a replicative origin
Source: HighWire-hosted journal article supplement (doi:10.1101/gr.240705.118), 2019-03-14
Supplement: Supplemental_file_1.zip [file contig.2.DB76_length_616_mean_cov_8.66558441558.docx]

**DB76_length_616_mean_cov_8.66558441558**

GCCTTCCTGGGTGATGACCTGGCGGCAGATCCCACAGGGCTTCACCTTCTTGAAGGTCTTCACCTTGAAGCGGTGTGTCTTGGGGGCCT
 >chr2:218855677-218856057 + E=5e-217
CCAGATCCTCTGGCTGTGGGAGGAGAGGCACAGAGTCAGCCCTGGGTAGAAGGCTGGGGTCCTGGGGAAGGAGTAGAGGAGCCTGGGGG

AGAGGTAGGCAGGGACAGGGAAAAGGATGGCAAGAGCCCCTCAGGGTCCAGAGGAGGGAGGAGGGCCCAGGGACAGAGAAAGGTGTGGG

GTGACAGGATGTTCATCCCAGACTCAGGTGGGGCCCATGGCCTGAGTCCAGACGGCAGCTGGAGAGTCCAGCTCCAGGGACCTGCAGCC

CCCGCATGGCTCCTACCTTGG|CTT|CTAGTCCCCACCATTGCTGCTATTGCAGTGTGCCTGGGACCCTTAGAGCCCCACAGTATCTCC
 >chr2:218650148-218650387 + E=4e-132
GGAGAAAGCCATCCCTCTGCCTCCTGTGTCCCCGGCTCAGGGACATCGCTCACCAAGGGAGCCTGATACGTGAAAGAAGTTCAAATGTT

CTATCAACTGGGAAGGCCTGCGGCAGCAATGGGCACTTCCTCTGCACCACAGCCATCCGACCACAAGAGGGCGACATCCCCCTT
