# Supplementary material for: Chromothripsis during telomere crisis is independent of NHEJ, and consistent with a replicative origin
Source: HighWire-hosted journal article supplement (doi:10.1101/gr.240705.118), 2019-03-14
Supplement: Supplemental_file_1.zip [file contig.2.DB76_length_660_mean_cov_9.18787878788.docx]

**DB76_length_660_mean_cov_9.18787878788**

CATGTAACTAGAATGCACCTGTACATGAATTTTAAAATGTCATACTGTGCTATTTTTCTTAATTCTGTAAGGGTAACAAGTAACTCAGT
 >chr10:74890858-74891182 - E=3e-183
AATGACTTAAAACTTGCTATATATTTTCAATACTAAGATAAAAGTTTTAACCAAACTTACAACAGGCACATTTTGGCAGTTAGTGTAAA

CACAACATTAACAAGCCATATGCCAGAAGATGTTTGCTTCCAAGGCCTTAGAGAAAATGACTGAACAAGGGCCTACATCCAAACTAATG

CTTCCCCCTTCCCCCTGATTTTTGACAGTTGACAGCTCATCAGTTTTCTTCTCAC|AC|CGGTGCTGGTCTGTGGCCTGTTAGGAACTG
 >chr10:74935820-74936135 - E=9e
GGCTGCAGAGCAGGAGGTAAGTGGCAGGTGAGTGCATGAAGCTTCATCTGTATTTACAGCAGCTCCCCATGGCTCGCATTACCACCTGA
-178
GCTCTGCCTTCTGTCAGATCAGTGGTGGCATCAGATTCTCACAGGAGCACAAACTGCGCATGCAAGGGATCTAGGTTGTGCATTCCTTA

TGGGAATCTAATGCCTGATCATCTGTCACTGTCTCCCATCATCCCCGGATGGAACCATCTAGTTGCAGGAAAACAAGCTCAAGGCTCCC

ACTGATTCTACATTAT|AGATCGGAAGAGCACACGTCTGA
