# Supplementary material for: Chromothripsis during telomere crisis is independent of NHEJ, and consistent with a replicative origin
Source: HighWire-hosted journal article supplement (doi:10.1101/gr.240705.118), 2019-03-14
Supplement: Supplemental_file_1.zip [file contig.2.DB76_length_670_mean_cov_13.6358208955.docx]

**DB76_length_670_mean_cov_13.6358208955**

CTACCACACCTGGCTAATTTTTATATTTTTAGTAGAGATGAGGTTTCACCATGTTGGCCAGGCTGCTCTTGAACTCCTGACCTCAGGGG
 >chr5:163523428-163523775 - E=5e-194 p=1e-02
ATCCACCCGCCTCAGCCTTCCAAAGTGCTAGGATTACAGGTGTGAGCCACCGTGCCTGGTCTAGACATCTTTTATTCAGAAATTACATA

CATTGTCTCTAAAAACAATGGGCAGAAAAGTCAAACTAAGGAGCCTGAGACAAAAACAAAAGTATCATTTCATCACCTGCCAAACTCAC

AACCCTTCAGAAAGGGAGGAAGAAGAAGAAGAGATGAGCTATTTGCCAACTAAGAATATCTCATTAAAGCCACTTGAAGC|ACACACT|

TGTGTGTGTGTGTTCCAGTTGCTCTGGTTGTATAACAAGTTATCCTAAATATTAGTGCTTCAAACAATGATAAAATTTACACTTTACTT
>chr5:163517502-163517818 - E=2e-178
ACAAATCTGAAGTTTGGGCAAGACTTAGTGAGAACAGTTTGTTTCTGTTTTACTCGGCATCCCTTGGGGTGGCTGGAAGGGAGGAAGCT

GGAATCATCTGAAAGCTTATTCACTCACATTTCTGGTAGTTATCTGTAGACTGTGTTTAATTGGGGTCATTAGCAGAAACAAGTAAACA

CCGTGGCTTTTCCATGTGGCCTGGGGTTTCTTTCTCACAACATGATTGC
