# Supplementary material for: Chromothripsis during telomere crisis is independent of NHEJ, and consistent with a replicative origin
Source: HighWire-hosted journal article supplement (doi:10.1101/gr.240705.118), 2019-03-14
Supplement: Supplemental_file_1.zip [file contig.2.DB76_length_783_mean_cov_8.37164750958.docx]

**DB76_length_783_mean_cov_8.37164750958**

GGGTGCGGGTGCGGAGGGCTCGCGCTGCTGGGCACCCATGGACCTCAGCCACGGCGGGCCCAGGGACGGACCTCCAGGAGGCCTGCTGG
 >chr17:73839451-73839840 - E=3e-219
GGGAACAGGTGCGGGGCATCACTGGGGCTGGAGGCCGGGGTGCTGGGGCCCCCATACCCTTGGCCTGGATCAGGCCTCAGAGGAGCCAT

TCCTGTCCATCTGAGCCTGCTCTGGGCCTCCCGGGACACTGCCTTTCCACCTTGCTCTGCAGATCCAGCCTCCATCCCACCACTTCTCC

CCCGAGCAGGTAAGAGTCAGAGTGCTGGGGTGCAGAGAGGTGGGGAGGGCGGCTGTGTGTCCTCCTGCCGGCCGATGCTGATGGCAGCA

AGCAACTTGCGGTGGGGAGGGGACTCCTGGGT|C|AACAACAGAGAATCCCACAAAGAAACCATACACTTCCTATAACCAATGTTCCCC
 >chr17:73781804-73782199 - E=9e-223
AACCCCAGAACAGTTTCCCAAGGTCTTCTATAACAAGAGTTCCTCCTGACTGGTTTGAGTTCTTTCTACTCCAACAGATGATTCTGTTC

TTCGTTCACTGAACAACTTAAGAGCTGTTCAACCCCCCAGGTTCCAAAACCTCTCGCAGCTGGGGATCCTTTTAAACATGCACATCACT

CAGGAGCCCATGGGGATGAGAGGCATTCACAGAGCATCAGGGAAAATGGAAAGCAACATTTTGCTTAACAGGAGAAACCGCCCCTTATT

CATCTTTCTCCCACATCACCTAACTCTAGGGAATGCTTAACGTGGCTTGAAGGAAATGAAGACAGCGACCTAA
