# Supplementary material for: Chromothripsis during telomere crisis is independent of NHEJ, and consistent with a replicative origin
Source: HighWire-hosted journal article supplement (doi:10.1101/gr.240705.118), 2019-03-14
Supplement: Supplemental_file_1.zip [file contig.2.DB77_length_270_mean_cov_5.0.docx]

**DB77_length_270_mean_cov_5.0**

GATTTGACTGGGCAGTCAGGCACTCACTCACACAGGGCAGGTGGGGCTGGCTGTCAGCTTGTAGCTCATCTAGGGCTGTTGTCTGAGCG
 >chr8:953654-953828 + E=1e-93
CCTGGATTCTCTCTCATGAGACCTGTCCAGCACCTTGGTCCCCCCATACCCCAGAATGGTGGCTCGGCCCTAAGTGGGAACCAT|T|AT
 >c
TATTTGAAATAAATGGAACATTTATAAAAAATATTTTCCCTTGGTTTAGGAGTTTTTATAGCTGAAGCTTTGTGAGAATGAGATTTGAA
hr8:5552578-5552675 + E=4e-44
GTGTG
