# Supplementary material for: Chromothripsis during telomere crisis is independent of NHEJ, and consistent with a replicative origin
Source: HighWire-hosted journal article supplement (doi:10.1101/gr.240705.118), 2019-03-14
Supplement: Supplemental_file_1.zip [file contig.2.DB77_length_333_mean_cov_5.40540540541.docx]

**DB77_length_333_mean_cov_5.40540540541**

ATCGTATGTAAAATTTAGTGATGTCACATGAATTTGCTTAAAGTATAGATTATTTTCATAATTCTAGGAAACCAGATATTAAGCACTAA
 >chr7:56804394-56804510 - E=2e-55
ACTTATTCTAGGAGTTTAGTTATTATA|CCAGCATGGTGAAACCCCATCTCTACTAAAAATACACAAATTAGCCAGGCATTGTGGTGTG
 >chr7:56801948-56802165 - E=2e-119
TGCCTGTAATCCCAGCTACTTGGGAGGCTAAAGTAGGAGGTGGAGGTTGCAGTGAGCCGAGATCGTGCCACTGCACTGCAGCCTAGTCG

ACAGAATGAGACTCCGTCTGAAAAATATATATACATTTATTAAGTGAACTTTCCAAAAAAAGTGGAT
