# Supplementary material for: Chromothripsis during telomere crisis is independent of NHEJ, and consistent with a replicative origin
Source: HighWire-hosted journal article supplement (doi:10.1101/gr.240705.118), 2019-03-14
Supplement: Supplemental_file_1.zip [file contig.2.DB77_length_352_mean_cov_8.52272727273.docx]

**DB77_length_352_mean_cov_8.52272727273**

AATGCTGCCTCTATGAGTCTGTGCACCAGTACATGGATGCATGGTATGACACAACACATGACAAGAATGAGTACACCTACTGCAGCTGC
 >chr8:5680603-5680798 + E=6e-88
GAGACAAATAAGACTTGAGGCTATGATTCCTTTCCATTTACCGAACCATTTTTCTAGCCACCTTGTAAAGGGATCATTTACCCTTGAGT

TTTTGGCTAACTCATTG|T|ACACAGCTCTGGGCTGGGTACCTGGAAGCTCACGAGCTTGTTTGGCCTCCCCTCCTGGACACAGGAGGT
 >chr8:952504-952660 + E=2e-82
GTCAAGGCTGTGGTCAGCAGAATCTACCCAGCTGGACACTGAGTGGACGCCCTGTGGGGTGGCTGTGAAATGGGTCCACTTTGTAGT
