# Supplementary material for: Chromothripsis during telomere crisis is independent of NHEJ, and consistent with a replicative origin
Source: HighWire-hosted journal article supplement (doi:10.1101/gr.240705.118), 2019-03-14
Supplement: Supplemental_file_1.zip [file contig.2.DB77_length_380_mean_cov_5.52631578947.docx]

**DB77_length_380_mean_cov_5.52631578947**

TATGAATTTGCCTATTCAGGTAAATGGAATCGTACAGCATTTGGCCTTTTGTCTGGCTTATTTTATTTAGCATAACGTTTTCAAGGTTC
 >chr6:119276748-119276889 + E=2e-70 p=4e-03
ATTCATGTTGTAACATATATCAGGATTTTATTTCTTTTTAAGGCTGAAT|GAC|ATGTGGCTCCATGTCCTTTCTACTGAGCAGTGATT
 >chr6:119300200-119300442 + E=2e-134
GATTTCTGGGACACCTCAATGTCCTGAGTCCACTTAGTCCAAAAAGGACAGATTAGAGTACCAGTGGTGTTGCTTGCATAGCTGGAGTA

CAGAGAGAGCTGAGGGGAATTCACTTTACTGTTTGTGTCCTGCCTATTCATGTGGTAACTTCAAATAAAATATGCAGTACACTTAGATA

TTCATTTTGACGTTTCAAAATTTTAA
