# Supplementary material for: Chromothripsis during telomere crisis is independent of NHEJ, and consistent with a replicative origin
Source: HighWire-hosted journal article supplement (doi:10.1101/gr.240705.118), 2019-03-14
Supplement: Supplemental_file_1.zip [file contig.2.DB77_length_466_mean_cov_3.21888412017.docx]

**DB77_length_466_mean_cov_3.21888412017**

ATACATTTTTTATTAATCAGATGTGTATTTATATCTTTCAGAAAATGGATGTGAATTAAATATAGCAGCAAAAGTCAATACTTCTAGAA
 >chr12:100212451-100212663 - E=5e-116
TTCCTGTTTTTAACTGAACTTACATGTATTAGCTTAAAGCTGCAAAATATTGCAGCTATTTACATTGGATATTATTAAATTTAATTTGA

TGTTTTACTTTGTTTTTGGGAAATGGAAAG|TATT|GAATTTAGAAAAATCTCAGGCCTTCCAATCTCAGTTTTAAGGCTAGCACCCTG
 >chr12:100198079-100198337 - E=9e-144
AACCAGAGCTTGCTTTAGAGCTTTGCCTGCATTATTTAGTAGTTTAGATATTTGTAATATCTTTTCTCAATTTCTTATTTATTCAACTT

TGGCAGCCTCTCAAAAAAGCATAAGAATTTTTTCTAACAGTCATATTAAGGAAAAACAGTCTCTCTCCTCAAAGGGGTATTGAAAATAA

GTAGGTATGCTTACTATTGTAGG
