# Supplementary material for: Chromothripsis during telomere crisis is independent of NHEJ, and consistent with a replicative origin
Source: HighWire-hosted journal article supplement (doi:10.1101/gr.240705.118), 2019-03-14
Supplement: Supplemental_file_1.zip [file contig.2.DB77_length_478_mean_cov_27.7677824268.docx]

**DB77_length_478_mean_cov_27.7677824268**

CTCCTGCTAAATAAATGGGGGCAGTAGATTTGCATCGGTT|TCCACATTACATTACTCATAACTGTGGCCTTCCTAATTTCTCATGTCC
 >chrUn_gl000219:56396-56763 - E=8e-115
CTAAGCACTTATTACAATGTCTCAGCAGCTTTCTCTCAGCCTCTCAAAATATTAGTCATCATGAAAATAAATGTCTGATGTTAAAGCAT

CAGGGGTCAGTTGTATTGTGACACCTAAAATTTCATGTAGCACCCCACCATGTCCTCAGCCTAATGACTTTCATGTCCCCACCAGACTG

CAAAACTCTGAATTAGTCAAGCACATCCCTGAAGGGACCAGGGGTTACCCCACCCTCTGATTTCTACCAAGCCTGCCTCCCACACCCTC

TGTTCCAGAGTGCAACCCTGGGTAGACCTGCATAAATGCAGTGTCATCCCC|CTGGCTGAGTATGTGTGACGAG|TAAATTACTGGGAA
 >chr9:6842585
TTTCGTCTGCTCAGTGTTTTGTCTGCAGCCATTCCC6-68425910 - E=2e-12
