# Supplementary material for: Chromothripsis during telomere crisis is independent of NHEJ, and consistent with a replicative origin
Source: HighWire-hosted journal article supplement (doi:10.1101/gr.240705.118), 2019-03-14
Supplement: Supplemental_file_1.zip [file contig.2.DB77_length_528_mean_cov_9.62121212121.docx]

**DB77_length_528_mean_cov_9.62121212121**

TGAATCACGAGGTCAGGAGTTCGAGACCAGCCTGGCCAACATGGTGAAACCCCGTCTCTACTAAAAATACAAAAAATCAGCTGGGCGTA
 >chr2:14168735-14169021 - E=3e-147
GTGGCAGGTGCCTGTAATCCCAGCTACTCGGGAGGCTGAGGCAGGAGAATCACCTCAACCCGGGAGGCAGAGGTTGCAGTGAGCTGGGA

TTGCACCACTGCATTCCAGCCCTGGCGACAGAGTAAGACTGTGTCTCAGAAAAAAAAAAAAAGAAAACTCAACTTGAGTACGTGTTTAA

GAATTCTCAGGGTG|GA|GAATTCTGAACACACACACACATATGTATATATAATAGCTAGTTATAACAGCTAATGAGAAGACAACCATC
 >chr2:14167554-14167801 - E=5e-137
TACAATAACCATATATACACAGAGATGAGAACAACATGCAGTTCTGATGGAAGAAATACTCCAAAATCTTATTGAGAAACAATGGATTG

TTAAATATAATAGTGTCTTTAATGACGCCATTTTTGAACTTATATCAGTAAACAGATCACCCCAAATTAACAAGTGTAATTTTGT
