# Supplementary material for: Chromothripsis during telomere crisis is independent of NHEJ, and consistent with a replicative origin
Source: HighWire-hosted journal article supplement (doi:10.1101/gr.240705.118), 2019-03-14
Supplement: Supplemental_file_1.zip [file contig.2.DB77_length_540_mean_cov_8.0537037037.docx]

**DB77_length_540_mean_cov_8.0537037037**

TGTGAATGAATCCAATCTCTAATTCTAATTTTTTTATTATCTTTTTTATTTTTTATTTATTTAGTGTTTTTGAGATGGAGTTTCGCTCT
 >chr9:30560441-30560664 + E=1e-116
GTCACCCAGGCTGGAGCACAGTGGCGTGAACTCCGCTCACTGCAACCTCTGCCTCCCGGGTTCGCGCCATTCTCCCGCTGCAGCCTCCC

GAGTAGCTGGGACTACAGGCGCCCGCCATCATGCCTGGCTAA|GTT|GGGGAAATTACAACTGGGTAAGTTGTTGAAACGGTGTGCTTT
 >chr9:30561266-30561587 + E=9e-177
ATCTGGACATCCATTTATTGCTTCACCTGTATAGACCCTAACTCTAACAGGGAACACTTTAGATCTCTTTTTATTAATGTCAACTCTGA

CCCTTTGTTTGATAGTCCTTGAAATGTCTTAGTATTTTTCTTTCCCCAGAAAAATTCAACTGAATAAATGGCTATACGTCTCTTTGGGG

CAAAAGTGGAGTAATCATTACAAGATATAATTGCTTTAATTTTGTACAGCTATTTGATTTAAAAACTGGCCACGTAATCAACTAATTTC

ATATCTGA
