# Supplementary material for: Chromothripsis during telomere crisis is independent of NHEJ, and consistent with a replicative origin
Source: HighWire-hosted journal article supplement (doi:10.1101/gr.240705.118), 2019-03-14
Supplement: Supplemental_file_1.zip [file contig.2.DB77_length_545_mean_cov_6.60550458716.docx]

**DB77_length_545_mean_cov_6.60550458716**

CATGCACGTAGCAAAAACACCAGGGGTCTTGAGAGGTCATAGCCTGAAAAGGAAGTAGAGAGAGAAGCAGAGGAAGTGACACTTAACGT
 >chr1:28211643-28211960 + E=4e-176
GAATGACCGTTTTTCATGGACTCTGCTTCCCCATTTCTTGAGACCCTGATGATTTCTGCTTTTTCTCCCAAAGTCTTCTCAAGTCTTAG

GATTGCAGCAACACGCTCGGCTGCCCAAACCCAAGGCGAAGACCTTGCCAGAGTTCATCAAGGATGGCTCCAGTACGTACAGCAAGATT

CCTGCCCACAGGAAGGGCCACAGGCCCGCTAAGCCCCAAAGGCAGGATCT|GAT|AAGCCCCATGTGAAGCAAAGGAGAGGTACTCCCA
 >chr1:28276702-28276927 - E=9e-12
GTTGGATCTGAGTTTGAGTCCCTCCCTCGGAACCGACTAGCTCGGAGCCACAGGTTCCTTTTCTATACATTGGGAATAATGGTGCCTGC
4
TGTTGGGGTCAGGGGAATGTCCTGGTTTGACCCCTGCTGGAAGACAAAGGAAACCAAGCAGCCTGACTTGGGTTGGCTGGGTTAGATAA

CCTGGAAGCATCC
