# Supplementary material for: Chromothripsis during telomere crisis is independent of NHEJ, and consistent with a replicative origin
Source: HighWire-hosted journal article supplement (doi:10.1101/gr.240705.118), 2019-03-14
Supplement: Supplemental_file_1.zip [file contig.2.DB77_length_680_mean_cov_8.75294117647.docx]

**DB77_length_680_mean_cov_8.75294117647**

TCGGAGCACATCTGGTGCGAGGACTTTCTGGTGCGGAGCTTCTACCTGAAGAACGTGCAGACCCAGGAGACGCGCACGCTCACGCAGTT
 >chr2:220159531-220159851 - E=9e-181
CCACTTCCTCAGCTGGCCGGCAGAGGGCACACCGGCCTCCACGCGGCCCCTGCTGGACTTCCGCAGGTGAGCGCGGGCGCCCCCGCCTG

GAGGGACCGCATGGGCGGGGGCGGAGCCGGGGTCCGCCCGCCGCTCGGCCTGGAGCCCCGGGTCGGGCCTGGAGCCTCGGCCTCTGACT

TCTGGCCGCCCGCTCCAGACCCCACGCTCCCACCCCTAAAAGCAGGCCTG|AGG|GCTCTTTCTTGCTTTCTCCCCATTCCATATATTG
 >chr2:220583046-220583409 - E=1e-203
TCACTTTTTCCTTAATGAGAACCCTGCTTCCCAATAGTAACACATTTACTTATTTGCTCACTCCTATAATACATATGTCAAACCTAAAT

AACAGACAGAGTGGGAGACTCTCTAAAAGAAAATGATATTTATTAAGGAGTAGCATTGCAATGGGAATGCACATGCCATAGTAAACTAT

GTGCCTATTCAGGGAGGTTGAGACAAATGGAAGTTTTTAAAGGAAAAATGAGGGGGATTACATAATTTGCTTTGAGTCAATTATCCTTG

GCTACAAGGTTCAGTAACAAGGGTGGTGTCAGTCTGAGGTTGGATGGGCAGTTGCTGAA
