# Supplementary material for: Chromothripsis during telomere crisis is independent of NHEJ, and consistent with a replicative origin
Source: HighWire-hosted journal article supplement (doi:10.1101/gr.240705.118), 2019-03-14
Supplement: Supplemental_file_1.zip [file contig.2.DB77_length_706_mean_cov_11.5694050992.docx]

**DB77_length_706_mean_cov_11.5694050992**

TCCCAACAATGAACTCGAGGAATTTTAGAAACCCAGTAGAATACTCTAACATGAGAATTTGTATTATTTAAATCTTGAATACCAGAACC
 >chr4:33661306-33661595 - E=4e-159
AAAGATTAGAGGAGTTCTGTTTGTTTGTTTTTGTATTTTGAGACAGAATTTCACTCTTGTTACCCAGCCTACAGGGCAATGGCGTTATG

TTGACTCACTGCAACCTCCGCCTCCCAGGTTCAAGTGATTCTCCTGCCTCAGCCTCCTGAGTAGCTGGGATTACAGGTGACCACCAGCA

CACCCTGCATATATATATAT|AT|GTACTTAGTGTCCTAGATTAAGCATTAATTTTTCTACTGAATCACAGGTATAAGTCCTGAGCTAC
 >chr4:33641430-33641849 + E=2e-240
TACTAGAGAAAGACAGTTTTTAGCAAAACAAACAAACAAACAAACAAAAAAAACAGGGAGCATAGCTTTGCTCCAACACTCTAAGAATC

TGGACTATGATTTTCCCAGTAGATTTTTTGAGAGACTCCATATAGTCTTCTTATCTGCTGTAGATTCATCATCAAATACCATTGTGTCC

ACTAATCGTAAGGACAGAACATCTGGACCTGCTCGAGGCATTCCTTCCTCATCCTTATTTAATGTTGGAGACCACATCGATTAATAGGT

AGCTGATGAGAATCCCATCCATATGCCAAATTTGTTACATCCTAAATTCAAAGATTCCCCTCAATTCTCATTATGTGCAGTGGAT
