# Supplementary material for: Chromothripsis during telomere crisis is independent of NHEJ, and consistent with a replicative origin
Source: HighWire-hosted journal article supplement (doi:10.1101/gr.240705.118), 2019-03-14
Supplement: Supplemental_file_1.zip [file contig.2.DB77_length_724_mean_cov_7.66574585635.docx]

**DB77_length_724_mean_cov_7.66574585635**

ATGTGATTATGTGAAGAGACTGAATCTATGACTGATTGGTGTACTTGAAAGAGATAGGAAGAATGGAACCAGCTTGGAAAACATATTCC
 >chr11:49183506-49183850 - E=4e-195
AGGATATAATCCATGAGAACTTTCCCAACATAGCTAGATAGGCCAACATTCAAATTCAGGAAATGCAGAGAACCTCAGTAAGATACTAC

TTGAGAAGATCATCCCCAAGACACATACTCATCAGATTCTCCAAGGACAAAATGAGAGAAAAAATGTTAAAGGCAGCTAGAGGGAAAGG

CCAGGTTACCTACAAAGGGAAGCCCATCAGCCTAACAGTGGACCTCTCAGCTGAAACCCTGCAAGCCAGAAGAGAT|T|ATATATATAT
 >chr11:491
ATATAATCAACAACAAAAGAAAGGGAATCATGACTGTTACACGTACACAGTGTATTATACTGATATGATTTGACTCTGTGTCCCCACCC
77372-49177753 + E=2e-208
AAATCTCACCTTGAATTATGATAATCCCCACGTGTCATGGGAGAGAATTTATGGGAGGTAATTGAATCATGGGGGACGAGTTTTCCTGC

ACTGCTCTAGTGATAGTGAATAAGTCTCATGTGAGCTGATGGTTTTATAAAGGGAAGTTCCCCTGTATATGCTCTCTTGCCTGCTGCCA

GGTAAGATGTAACTTTGCTCCTCACTCACCTTCAGCCATGATTGTGATGCCTCCCCAGCCATATGAAACTGTGAGTCAATTAAACATAT

TTCCCTTTTAAATG
