# Supplementary material for: Chromothripsis during telomere crisis is independent of NHEJ, and consistent with a replicative origin
Source: HighWire-hosted journal article supplement (doi:10.1101/gr.240705.118), 2019-03-14
Supplement: Supplemental_file_1.zip [file contig.2.DB78_length_323_mean_cov_12.5108359133.docx]

**DB78_length_323_mean_cov_12.5108359133**

ATCATATCATATGCTGTGGGCTTAGATTTGGCTTGTCATTTCTAAGACTCTCCTGGGAAGTTGTACGTAAAATAGTTTCTACTTAAAGT
 >chr13:77007599-77007720 - E=2e-58 p=3e-03
TAGAAGGAAATTTTTTTTTTTTGT|GTTTAAGT|GTGTAGTAACTTTTCTCTCAAGTTTAAAATACACCTTTCTTTATCTTCTCTTGGT
 >chr13:76997557-76997749 - E=1e-88
TTTCTTTTTTTTTTCTTTGAGACGGATTCTTGCCCAGTCGCCCAGGCTGAAGTGCAATGGCGCGATCTCAGCTCACTGCAACCTCCGCC

TTCCGGTTTCAAGTGATTCTCCTGACTCAGCCTCC|TGAGTAGCTGGGATTACAGGCAT
