# Supplementary material for: Chromothripsis during telomere crisis is independent of NHEJ, and consistent with a replicative origin
Source: HighWire-hosted journal article supplement (doi:10.1101/gr.240705.118), 2019-03-14
Supplement: Supplemental_file_1.zip [file contig.2.DB78_length_343_mean_cov_6.9970845481.docx]

**DB78_length_343_mean_cov_6.9970845481**

TGGAGCATTTGGGAAGCCTGAAGCCTGCCCTTCCTGGCAGCATCAGAAAGCAAGGAGAGATGTTGGTGTACAGGCAAAAGTCAGCTCTC
 >chr5:5556212-5556422 + E=4e-112
AACACAGGTGATGGAGGACTGTGTATGTAGCCAGGGATAAAGAATCCAGGAGGGGCCTGAAGATGGGTGGAACCAATGAAATGAATCAT

CCCAGGTGTATCATCTCTTGTTTGGAAATATC|AAGATGT|ATATATATATACAATGGAATACTACTCAGCCATAAAAAGGAATGAATT
 >chr5:5561282-5561408 + E=2e-58
ATGGTCCTTTAATGGGTATGAAAGTATATGTAAGTTTCAGGGTCTCTTTCCTCTGAGATGCCTCTGGTACTGATGGCT
