# Supplementary material for: Chromothripsis during telomere crisis is independent of NHEJ, and consistent with a replicative origin
Source: HighWire-hosted journal article supplement (doi:10.1101/gr.240705.118), 2019-03-14
Supplement: Supplemental_file_1.zip [file contig.2.DB78_length_382_mean_cov_7.48691099476.docx]

**DB78_length_382_mean_cov_7.48691099476**

GGGTGGAAGGGCCGCAGGATAAGGAGGACCCCGGGGGGGGGAAAGGGGGAGGGAGGGAAGGTAAGCCAGGGAAGG|GGGGGGGGACCTG
 >chr6:159126
GGGGCAGGGTAACAGTGAGATCTGGAAAGTCACATAGAGCAGGAGGGACTCGGGGCAGGGTGACATTGAGGGCTGTAAGGTCACATAGA
596-159126774 + E=2e-76 p=0e+00
CCTGGGGACAGGGTGAC|AGGGCTGTAAGGTCACATAGACCTGGGGACAGGGTGACAGTGAGGGCTGTAAGG|TCACATAGACCTGGGG
 >chr6:159126677-159126865 + E=9e-102
ACAGGGTGATAGGTGAGGGCTGTAAGGCCACGTAGGGCATGGGGGACCCAGGAACAGGGTGACAGTGATGGCTGTAAGGCCACATAGGG

CAGGGGGATCCAGAGACAGGAGCACCCTG
