# Supplementary material for: Chromothripsis during telomere crisis is independent of NHEJ, and consistent with a replicative origin
Source: HighWire-hosted journal article supplement (doi:10.1101/gr.240705.118), 2019-03-14
Supplement: Supplemental_file_1.zip [file contig.2.DB78_length_391_mean_cov_8.82352941176.docx]

**DB78_length_391_mean_cov_8.82352941176**

TAGCTATCAAGTAATTTTGCAGAAACCTTCTGCCACACTCCTGTGGAGTGACCAAGGTTGGGTTTAATATGATGGAGCACTGTCTTTGA
 >chr22:48722376-48722514 + E=1e-65
GCAGCGAGATTGGATTTGGCATCATTGCCATGTCTGTCAGAGATTTTG|A|CAGTTCAGCTGCCCAAGAGGAGCTCAATCCTGCCAGCA
 >chr22:48725572-48725826 + E=1e-141
GCAACATGTGAGCCTGACAGCACATTATTTCCCGCTCAAGCTTTCAGATGAAACAGCAGCCACAATAGGAGGCTTAGCTGCGACTTCAT

CAGGGATCACAAGCTGGAGGATTTAGCCAAGTGCACATGAATTTCTGACTCACAGAGACTGAGATAACAAGGGCTTATTGTTTAAACTG

CTAAAGTGTGAGATGACGTGTTATTAGGCTACACATA
