# Supplementary material for: Chromothripsis during telomere crisis is independent of NHEJ, and consistent with a replicative origin
Source: HighWire-hosted journal article supplement (doi:10.1101/gr.240705.118), 2019-03-14
Supplement: Supplemental_file_1.zip [file contig.2.DB78_length_405_mean_cov_7.77777777778.docx]

**DB78_length_405_mean_cov_7.77777777778**

TGCACAGTGTACTGAATGATTAAGGTAGGTGCTTTCTTATTTTCCTGTCAAGAACATTTATATATCTGGCTACAAAAGTGATATAGGAT
 >chr11:37074484-37074750 + E=9e-149
TACTGACAAAGTTAAAACACACAGAGGGATACAAGACAAAAAACAAAATTGCTTACAACTTTACAAGTCAAAATAACTGTGGCTAACAT

TTTAGTGCATAACTTTAGTGCATTGTTTTTAAAATGACTTTTGTTTTCTTCCATGACCTCTGGGAAGGCCGTTAACTATATATATAT|A

|AACTACCTGAAGAAGGGGAGCAAAGTTGCAGAGGGGATTCAGGTTTTGAAAGGATGGTTAGATTGATGAACTTGGAATCTTTTTCCTC
>chr11:37075941-37076081 - E=9e-73
TGACCAAAAGATTCCATGATTGTATATGTTTATGTAAATATTCTTCTAGTA
