# Supplementary material for: Chromothripsis during telomere crisis is independent of NHEJ, and consistent with a replicative origin
Source: HighWire-hosted journal article supplement (doi:10.1101/gr.240705.118), 2019-03-14
Supplement: Supplemental_file_1.zip [file contig.2.DB78_length_413_mean_cov_11.4043583535.docx]

**DB78_length_413_mean_cov_11.4043583535**

CCCCACTGTGTCTGGAAGGTGGGCCATGGAACCAAAGAAGATTATTCTCAAGTCTTACGGTTTAATGTTGTTTGCCCTGTAGGTTTTCT
 >chr11:99230578-99230898 - E=2e-181
TTTTAATTGTCTATTTTTTAAATTTTTAATTTTTATGAGTATGTAGTGGGTATATGTATTTATGGGGTATATGAGATATTTTGACACAG

GCATACAAGGCATAATAATCACATCAGGGCAAATGAGGAATCCATCCCCTCATGTACTTTGATTTTTAATCCAAGTTGTTCATTCTGCC

TTTAAGTTTTTTTCATATATACTTGGTTTCAGTTACCCCTTTCTTCCTTCTGA|AGTAACAG|TCAGCTTGTGACTGTAATATTGCCCT
 >chr11:99219870-99219955
TTCAGACACGATTGGGCACATTCAGGGTGGTCTGGCCATAGACTAATATTAGCTTTTCA- E=1e-36
