# Supplementary material for: Chromothripsis during telomere crisis is independent of NHEJ, and consistent with a replicative origin
Source: HighWire-hosted journal article supplement (doi:10.1101/gr.240705.118), 2019-03-14
Supplement: Supplemental_file_1.zip [file contig.2.DB78_length_477_mean_cov_7.90566037736.docx]

**DB78_length_477_mean_cov_7.90566037736**

TGAGGTGGGTGGATTTCCTGAGCTCAGGAGTTTGAGACCAGCCTGGGCAACATGGTGAAACCCCATCTCTACTAAAATACAAAAAATTA
 >chr16:50067539-50067816 + E=6e-148 p=3e-03
GCCAGGTGTGGTGGTCTGTGCCTGTAGTCCCAGCTACTCGGGAGGCTGAGGTGGGAGAATCGCTTGAACCCGGGAGGCAGAGGTTGCAG

TGAGCTGAAATCACGCCACTGCACTCCAGCCTGGGCGACAGAGCAAGACTGCGTCTCAAAAAAAAAAAGAGTACGCTTTGTGTTTTTTT

TTTGAGA|TGATTTTTGAGATTTTTG|AGATGATTTTAAAGAACAGATGAGAAAAGTACATTCAGAAAAATGAGAGAAGGCTCATCCAC
 >chr16:49998230-49998415 + E=9e-100
AGTTAGTTCCCAGGACAGACCCATACTTGTGGTCGTTACCACCAAGATGATTCCTTGCTAAAGAGTAAAAGAATGAGCTCATGCTGTCC

TCTCAACACTTTGGGAGGCCGAGATGGGAAGATC
