# Supplementary material for: Chromothripsis during telomere crisis is independent of NHEJ, and consistent with a replicative origin
Source: HighWire-hosted journal article supplement (doi:10.1101/gr.240705.118), 2019-03-14
Supplement: Supplemental_file_1.zip [file contig.2.DB78_length_493_mean_cov_11.8661257606.docx]

**DB78_length_493_mean_cov_11.8661257606**

ATCTCCGTCCACTGGCCCAGCCTGGCTCCCTGCCACCGCCACTGCCTCTGCCTCCACACTTCAGAAGAAAGACTTTACAGGAGCCGCAG
 >chr7:131530653-131530833 - E=1e-96
ATGATGCTGAACTTCAATTAGGCCCTGCTGGCAAATTAGTCACGCAGGGTGACATTTTCCAATCATAGAACATTAGCATCCCCCCTAAT

TA|GCA|TCCTGATCAAGCCAGAAGCTCACCATTGTTCCTGCGCAGCTAAGTGCCCAGGTTCATCCTAATTGAGCTGAACACTAGTTGC
 >chr7:131505564-131505874 - E=5e-172
TGGGTTCCATGGTTCTCTTCTATGACCCACAGCTTCTAATAGAGCTATAACACTCACCCCATGGCCCAAGGTTCCATTCCTTGGAATCC

GTGAGGCCAAGAACCCCAGGTCGGACAACAAAAGGCCTTCTGCCATCTTAGGAGCGGCCACCACCATCTTGGGAGCTCTAAGAACAAAG

ACCATCTGGTAACATTATGACCTGAGTTGGGGTAGTGGTTAATGGCCTTA
