# Supplementary material for: Chromothripsis during telomere crisis is independent of NHEJ, and consistent with a replicative origin
Source: HighWire-hosted journal article supplement (doi:10.1101/gr.240705.118), 2019-03-14
Supplement: Supplemental_file_1.zip [file contig.2.DB78_length_500_mean_cov_4.404.docx]

**DB78_length_500_mean_cov_4.404**

TTGTTTCCATTGTTTTTGTTTACAAAAGCTAATCCTTGTTACTAAGATAAAACAGAAAGATAAGTAAACTTGGAAACTGACCACTGTGC
 >chr13:85264281-85264683 + E=1e-230
CACTTTGCAAATTGAGAAGTTGAGATGGAAGGTTTTTTCGGGCTAGGGTTAAAAAAAGTCAGTGTTGGTAAAGAGAATACATCAAGGCC

TATTAATAATCTACTTCTTGTGTTTCTTGACATTACAATTCTACATTGTATCTTATCCAGAGCCAAAGTGCTTCTATATAGCCACTACC

TAATGAATGAATTTACAAGAAAAAAAAACAAAGCAAAGCAAAAGCAACCAGAAACTGATGATCCACCTGAAACTCAAGGATTTCCTATA

ATCATGGACCTCTTTTGATTTGGAAACCTGGATAAAGATGAC|AATT|AGCTGGGTGTGGTGGCACATGCCTATACTCCCAGGTACTCG
 >chr13:85270097-85270199 + E=9e-50
GGAGGCTGAGGCAGGGGAATTGCTTGAACTCCGCAGGTGGAGGTTGCAGTGAGCCAA
