# Supplementary material for: Chromothripsis during telomere crisis is independent of NHEJ, and consistent with a replicative origin
Source: HighWire-hosted journal article supplement (doi:10.1101/gr.240705.118), 2019-03-14
Supplement: Supplemental_file_1.zip [file contig.2.DB78_length_501_mean_cov_16.0099800399.docx]

**DB78_length_501_mean_cov_16.0099800399**

TATATGGGAAGGCAGAGGAACTATAGTAGTTAAAACAATTTTGAAGAGAAGAATACAATGAAAGGCATCGGTCTACCTGATTTCAAGAC
 >chr1:192994939-192995165 + E=5e-116
TTAGAGTTACAGTAATCAACACAATGTAGTACTGGCAGAGGAACAGATAAATGGAACAATGGAACAATGGACAGACTAGTGAGCCCAGA

AATAGACCCACACCAATATGCTCCATTTTTGCAAAGGTGCAGGAGGAATTCAG|TGG|TGAGTGCTTCCTTTGGATAGAGTAAAAAGTT
 >chr1:193721583-193721853 + E=6e-
ATATATCTGTAGACAAATGAAGTAATTCTCTCTACTCAGTTAAAAAAGAAGAAAGAATGTATATCTTATTCTATTTGCTCATTGCAGAT
151
GAAATCAGGCATTCTCCTATCTCTTTAATAATGTATAGACTGTACAATGTCATGGATTCTGAGGCAGTGTTTGGTAAATTAATGAAAGT

GTAAGCTTTAGCTCTACTTCTGTAAAAATTAAATGTGGAATTCAATAGAGTGTGTCTA
