# Supplementary material for: Chromothripsis during telomere crisis is independent of NHEJ, and consistent with a replicative origin
Source: HighWire-hosted journal article supplement (doi:10.1101/gr.240705.118), 2019-03-14
Supplement: Supplemental_file_1.zip [file contig.2.DB78_length_515_mean_cov_7.57281553398.docx]

**DB78_length_515_mean_cov_7.57281553398**

AAAACAAAGTTATTCCAAAAATGAGGACATCCTCCTGGCATCTGAGTCCTCACCCCATGTGCCACGGTGGCCGCTTCTGCCGTCCTCCA
 >chr7:5519719-5520066 - E=2e-197
CCTCCAGGCGCTCCTAGAGCTGTCCCTGGGCCAGTGGCTTCCAAAGGGGGCTGTAGTTGGGCCCTGCTAGCCTGGACCGCCGCCCTGGC

CGCTCTTGGTGAAGGGCCCCTTGTCCAGCCCGCCTTCCTCCTCCTGGGTTTCCGTGTGACAGATGCCCCGTCCTGTGGGGTGGTGTCTC

ACATTTGCTTTGCTGTTAAAAAATGGGGTACACCATCCCCAGGCCTCCAATCACCGGCCCTGCCCCTGAGTGGGGATGGT|A|CCTGTC
 >chr7
CTACCCAACCAGACTGCCACTTACAAAGCAGGAGTCAACAACCAAAGGCTGCGGGCTGCTCCTTCTGGCTGCACAACCTCCCTCTCCCA
:5629603-5629770 - E=7e-89
GGCACTTCCCTGGGGCTTCCTGCTGCGCCCTCCCTGGGGACCCCCTTCTCACCGCAACGTTGCAGCCTCACA
