# Supplementary material for: Chromothripsis during telomere crisis is independent of NHEJ, and consistent with a replicative origin
Source: HighWire-hosted journal article supplement (doi:10.1101/gr.240705.118), 2019-03-14
Supplement: Supplemental_file_1.zip [file contig.2.DB78_length_557_mean_cov_8.8868940754.docx]

**DB78_length_557_mean_cov_8.8868940754**

TTTTCATTTCTGTAAAGTTTTCCATGATGCAGATCCTGACCTCAGCATTTTACCTGTATTAACCCATTTAATCTAACAATCATTCTATA
 >chr2:19694496-19694779 + E=1e-158
GGTAGGTGCTATGACTACATTTTTATAAATGAGGAAACTGAGGTCAACAAGAGCAATTGAGAGCTCCTTCATAACAGAGCCAGAGAATG

AAACCTAGGCAGTCTTATTACACTGATGGGCCAGAAATATCCACAATGCCAGAACCACGTAATGTTGCAGCTGGAGGACAACACAGAAA

AAATCTAGTAAAT|CTC|CATTCACTCTTTTGCTGCTTTTTTTAATTTTTAATTTTTTTATTTCAATAGGTTTTTGGGGAACAGGTTGT
 >chr2:19710882-19711160 + E=8e-148
GTTTGGTTACATGAATAAGTTCTTGAGTGGTGATTTCTGATATTTTGATGCACCCATCACCTGAGTAGTATATACTGTACCCAATGTGT

AGTCTTTTATCCCTTGCCACCCCCCACCCTTTCCCCTAAGTCCCCAAAGTACAATGTATCATTCTTATGCCTTTGTGTCCTCATGGCTT

AGCTCCCACATATGCATGAGAACGT
