# Supplementary material for: Chromothripsis during telomere crisis is independent of NHEJ, and consistent with a replicative origin
Source: HighWire-hosted journal article supplement (doi:10.1101/gr.240705.118), 2019-03-14
Supplement: Supplemental_file_1.zip [file contig.2.DB78_length_557_mean_cov_12.3859964093.docx]

**DB78_length_557_mean_cov_12.3859964093**

ATCCTTATTTTTCCTAAAATGAAGCAAAACAAACCAAACTGAAACCAATTCACAAAGAAAGACAACTCCCATACCAGTATAACTATTAT
 >chr5:93536413-93536673 + E=8e-145 p=0e+00
CTCCTACTCCTACTCCTTAAATTTCTGCTCCCTTTTATGTTGACGCTCCTTTTTCTTGATTTCTTTTTTCCTGCTATATTCCTCACTTA

GAGGACACAGGTCCATTGTTCCTCAAAGCTGCTATTTCTCTAGAAATATAGAATTTAAAC|ATATATATATATATATATATAT|TTTGT
 >chr5:93540983-93541302 +
TTTGTTTTGTTTTTGAGACGGAGTCTTGCTCTGTCACCCAGGATGGAGTGTTGTGGCGTGATCTCGGCTCACTGCAACCTCCGCCTCCT
E=2e-177
GGGTTCATGCCATTCTCCTGCCTCAGCCTCCCGAGTAGCTGGGACTACAGGTGCCCACCACCACTTTTTTATATTTTTAGTAGAGATGG

GGTTTCACCATGTTAGCCAGGATGGTCTCGATCTCCTGACCTCGTGATCCGCCCGCCTCGGCCTCCCAAAGTGCTGGGATTACAGGCGT

GAGCCACCATGCCCGGCCCAATCTT
