# Supplementary material for: Chromothripsis during telomere crisis is independent of NHEJ, and consistent with a replicative origin
Source: HighWire-hosted journal article supplement (doi:10.1101/gr.240705.118), 2019-03-14
Supplement: Supplemental_file_1.zip [file contig.2.DB78_length_560_mean_cov_6.8.docx]

**DB78_length_560_mean_cov_6.8**

ATGACGCATTAGCCAAAAAACTTTGAATTTTTTATACTAGTCTATTTCGGCCCAGAACCACCACAGAAAATTGCC|AAAAAAAAACAAA
 >chr2:785512
CATGATATGAACAGGCTCTCATAAGTCCACAGTTTCTGACATGAGAAAAATAAAAACAATAACACAGGAAGTACGTTGAACATCAAAGT
38-78551484 - E=2e-133
TACTATTAGCTTCCAATCTGACCATTTCAGCATCACTCATTCAAAGGGAGCTGATGATTTGAAAGAAAAATATAGTTTCATTGTTTGTA

TTTTTAATTGAGATATAATTGACAAAATAAACTCCACCTATTTAAAATATATTT|T|AGTATCTTGATTACTGTAACTTTATAATAATG
 >chr2:78548925-78549165 - E=9e-1
ATAAAACTCAGGTAATATTAGCCCTGAAAATTTGTCCTATTTTTAAAATTTTACTTTAAGTTCTGGGATACAAGTGCGGAACGTGCAGG
33
TTTGTTACATGAGTATACATATGCCATAGTTTACTGCACCTATCAACCCATCATCAAGGTTTTAAGATCCACATGCATTAGTTATTTGT

CCTAATGTTTTCCCTCCCCTCATCTCCCA
