# Supplementary material for: Chromothripsis during telomere crisis is independent of NHEJ, and consistent with a replicative origin
Source: HighWire-hosted journal article supplement (doi:10.1101/gr.240705.118), 2019-03-14
Supplement: Supplemental_file_1.zip [file contig.2.DB78_length_579_mean_cov_9.26424870466.docx]

**DB78_length_579_mean_cov_9.26424870466**

GTTTCTGTATCACTTTTTATCTAACTTTTACTTTTTTTCTTTCATAGCATGAATCACTATCTGGCATAGGATATATTTGTTTAATGTAT
 >chr1:72140494-72140807 + E=1e-173 p=2e-02
GTTTTCATCCAACAGAATGTAGGCACCTTGAAACCTGCCTGTTTTGTATTCTTAGCAACCTTACCTAACACTTGTAACATTCCAACACT

GAATAAAGAAAAACTGAATATATACCAGATGTTGTATACATTGCATAAATATATATGTGATACATACGTATGTGATCTATATATGTGAT

CTATATATGCAATATATAAAATGCATGTTTATTCATATATATA|TAT|TTTAATTTATGTTAAATTGTCAAAGCCTAAATTAATGAATA
 >chr1:72143071-72143340 - E=3e-150
GCAAATGTGAACCTCCAAATGGGCTCATGTGGAAATATTCCTATTTGTGGTTATCTTTTTAAATTATATTAAGGGTTTGCTCTTTTGTG

GCTGTAAAATAAATATGATAACTTTACACAAGAACCCAATGTTCACTCAGTGAGTGTAGCAGAAATCAAATAAAAGCAGCCATGCAACT

CAAATTAAAGTTCAATATCATTAATTTAATTATAGTACATAATCATT
