# Supplementary material for: Chromothripsis during telomere crisis is independent of NHEJ, and consistent with a replicative origin
Source: HighWire-hosted journal article supplement (doi:10.1101/gr.240705.118), 2019-03-14
Supplement: Supplemental_file_1.zip [file contig.2.DB78_length_629_mean_cov_5.86645468998.docx]

**DB78_length_629_mean_cov_5.86645468998**

TAGGTCATAAACTAAAATATTTAAAATTTATACTTTATTGCTAAAGTTAGTAATATCCATATTACTAACTAGCCAAATTATGAGAAAGG
 >chr5:166368867-166369198 - E=1e-173 p=8e-03
CTGAAGAAAACTTTAATACTTACAGCATTAATTTTACTGAAACTGTCTAATCTAGTAACTAATATTAATATTCAAACAATGTAAAAAAA

TTATTTTATTTATTTTTTTTGAGACGAAGTCTCGCTCTTGTCCCCCAGTCTGGGGTGCAATGGCGCAATCTCAGCTCACTGCAACCTCT

GCCTCCCGGGTTCAAGCGAGTCTCCTGCCTCAGCCTCCCGAGTAGCTGGGATTACAG|G|AATCTGAGAAAGTAAAAAACATCAAAGAA
 >chr5:166367973-166368278 - E
TGCTACTTTACATGAATATCGTACAAAATACAGAACACCAGAAAATATGGATATCGGAAGTCTCCTTTTGCTATCCATGGTGAAGAAGC
=8e-169
CATTTTTACGATCTCAGCTCACCTGGGTAACCCTAACCCTAACCCTAATCCTACACCTTTGAAACAAGCTAAGCATGTTTCGCTGCTCA

CACTCAATGGATTCTACTGGCTTCATAAGGATAAAATGCTCTGAATAGGATGTATCTTGATCTTCTCTAGGTAACTTTAAGATGCATAG

GAGTTCAT
