# Supplementary material for: Chromothripsis during telomere crisis is independent of NHEJ, and consistent with a replicative origin
Source: HighWire-hosted journal article supplement (doi:10.1101/gr.240705.118), 2019-03-14
Supplement: Supplemental_file_1.zip [file contig.2.DB78_length_632_mean_cov_15.664556962.docx]

**DB78_length_632_mean_cov_15.664556962**

AAGCCTCTCTAATTGGGAAATTACACGCAAAAACCCAGAAAAATTGTATCCCTCCAAAAGGTTTCATAGGCACTCAGAATCTCTAGCCA
 >chrX:115336443-115336684 + E=3e-133
GGTGATTGGTGAAGATATTCTCCTGTATTAAGCCAGTCTGTAGATACCAAAAGATGATTTTTTAACAAATGCACAAAATTCAGGAAAAA

ATTATAAGGCACATTAAAAATGGAAGTATGCCTCAGGGAAAGGAAACAATAAATCACTAGATA|CACTAG|ATACACTGTTCGTGGGAA
 >chrX:115338645-1
TGTAAATTAGTACCACCTCTAGGGAAAACAATATGGAGACTTCTCAAAGAACAAAAAGTAGATCTACATTCAAACAAGCAATCCCACTA
15339030 + E=5e-220
CTTCATATATGCCCAAAGAAAAAGAAGTCATATCACAAAGACACCAGCATTTATATGTTTATCACAGTACAATTTACAATTGCAAAGAT

ATAGAATCAACCTCAGTGCCCATCAACTGATAAGTGAATAAAGAAAATGTATATACACCATGAAGTATTACTCAGCCAGAAAAAAAGAG

TGAAACAGTGTCTTTTGCAGCAATTTGGATAGAACTGGAGGCCTTTATTCTAAGTGAAGTAACTCAGAAATGGAAAATCAAATTCTGCA

TGTTCTCACTT
