# Supplementary material for: Chromothripsis during telomere crisis is independent of NHEJ, and consistent with a replicative origin
Source: HighWire-hosted journal article supplement (doi:10.1101/gr.240705.118), 2019-03-14
Supplement: Supplemental_file_1.zip [file contig.2.DB78_length_657_mean_cov_8.90410958904.docx]

**DB78_length_657_mean_cov_8.90410958904**

TTGTTGACAAAGCCAATGAATTATGTTATTCTTTCATTCAGTAAATATTTAATGCATAACTTTTATCTACAACGTGCTGTGGGGTGAAC
 >chr7:117732556-117732948 + E=4e-215
TGAAATTAAATGAAATTTATTTACTTAATAAATGTGTGATACAGTAAGAGAATAAGAGATGTGCAAACTCCTATAGTAGTAAGTTTACA

AGAAGTATTGGTGGTGAGCCAGAGATGTAGCGGAGAAGGTGGCATTTCACAGATCCTTAAAGAAATGATAAAATATGTAGATGGAGAAG

AAACTGGTGATGGGGATGGGATGGGGTGCTTAGTCAAAGCAGAAAAAAACTTCATAAGCAATGTTAGAGAGATCGTAAGAATCAGGTAC

TTATGGGGAGTAAGGAATATTTCCACTAAGGATG|AG|ACATAATTGTTCCCAATTACACTGTTTATCTCTGGAGTTTTGAGCATCTAT
 >chr7:117419406-117419673 + E=7e-149
ACTTCTAAAGGTTTTGTTCAGCTCATCAGCAACTAGTTGGAGAGAATGGATTTCTGTGTTCTCTAACTTAGGATGTGACTAATTTTTAT

GCTGTACTACTTATTTTTCATTCAGCCCTGTGATACAAAATTAATTCATTTTTCACTATAGAATTTTATACTGAATGTGTGTAACACCA

CAGATTTCTCAAGTAATATATATAAATAACATGAAA
