# Supplementary material for: Chromothripsis during telomere crisis is independent of NHEJ, and consistent with a replicative origin
Source: HighWire-hosted journal article supplement (doi:10.1101/gr.240705.118), 2019-03-14
Supplement: Supplemental_file_1.zip [file contig.2.DB78_length_673_mean_cov_15.3640416048.docx]

**DB78_length_673_mean_cov_15.3640416048**

CTGTTTAATTTTTAAATATACTGATCATAATTTACTAGACTGATTGTATAAAATCTTAGTGTCATGACTTTAACCTAGTATAGAAAAAA
 >chr14:40816008-40816390 - E=4e-215 p=2e-02
ATAGTAGGATCGTCTTTTCTTTTCAATTTAGTAGATAATTCCCTGTTTTTTCACACTACTCTGGATTATTATGGATGGATGACTCATGA

ATTCTATGCATTCAAAAACTAATATTCTTAGAAGCAGAGAAAAATTTCTTAAAATGAGGCCATTGAAGTACAATGCTTACTTGTCATTT

GGCTTACAAGTATCAGAAATAAGCATCAATGAACTAAGAATGTATTCTCAAGATGAAATACTTTTTCCTAATCTCATAGCTGTCAGACT

ACTATAGAATAGAAACTAATGCTTG|T|GTCTCAGGGATGTCTTTATTCCTATTTTAAAGCCATACATAATTTTTAAAAGTTTTCTTTC
 >chr14:40808702-40808994 - E=6e-164
CTCCTGTCTCTTAGGCTCCTGTGAGTGAGATAAATATTAAATGAGAAAAAAACATATTTTCAGATGTTTATAATTTCTGAGAACAAAGT

GGACAATATGTCATGAGATAGTAACCTGGATTAACTTGATAGGGAGAAAGGGTGTTCTCCCTGTTATAAATAAGATGATTAAGAATAAC

AAAGCTCTCTTGGTTGGCTACCTAAAGAAGGTAAATGAGTATTCTCAGGCTG
