# Supplementary material for: Chromothripsis during telomere crisis is independent of NHEJ, and consistent with a replicative origin
Source: HighWire-hosted journal article supplement (doi:10.1101/gr.240705.118), 2019-03-14
Supplement: Supplemental_file_1.zip [file contig.2.DB78_length_679_mean_cov_13.1001472754.docx]

**DB78_length_679_mean_cov_13.1001472754**

GGCATACGAGATTCTCCGGAGTGACTGGAGTTCAGACGTGTGCTCTTCCGATC|TCATGCTTTGCTTTAAAAAATAAATAAATAAATGC
 >chr6:159177424-159177749 + E=9e-1
AGGCTGGTGCAGTGGCTCACGCCTGTAATCCCAGCAATTTGGGAGGCCGAGGCAGGTGGGTCATTTGAGGTCAGGAGTTCGAGACCAAC
84
CTGGCCAACGTGGTGAAACCCTGTCTCTACTAAAAATACAAAAAAACAAGCCGGGCGTGGTGTTGGGCGTCTATAGTCCCAGCTACTCA

GGAGGCTAAGGCAGGAGAATCGCTTGAACCCAGGAGGCAGAGGTTGCAGTGAGCCAAGATCGTGCCACTGCACTCCAGCCTGGTGACAG

AGCGAGATCCTGTCTCAAAAAAA|TTTT|TTCATAGAGAAAGATAGCATATTTTGAAAAACGTGCAGATTGGCATATATTTGTGATTTT
 >chr6:159101941-159102238 + E=6e-167
ACTTACATTAGCAAGCATTAATTTTCTAAAAAATCCACTTGAGTTCATGTATAGCCTGAAAGAACCTAATGGAGAATTTATTTCAGTCA

ATACTGTAATTTATAGAAGAGAATCAGTCATGAGTTGAAGTTTTAATTTTTTTCTTAAATTTGCATAACAAAGGAATTGGCCAGTTTTG

TGGCACATTATTTTAAGGATGTGAAGATCTTATAATATTTACATGTTTGCCTTTTTATA
