# Supplementary material for: Chromothripsis during telomere crisis is independent of NHEJ, and consistent with a replicative origin
Source: HighWire-hosted journal article supplement (doi:10.1101/gr.240705.118), 2019-03-14
Supplement: Supplemental_file_1.zip [file contig.2.DB78_length_688_mean_cov_16.351744186.docx]

**DB78_length_688_mean_cov_16.351744186**

TGATGGAAGTATAAATGTGTAGGTGCAACATTTTGAAAGGCAGTCTAATAGTATCAGTGTGATTTTAGGTATTAATCTTAAGAAAATAA
 >chr15:66804280-66804597 + E=6e-179
TTCAAAAGTGTTCATTTGAATTGATGTCATCAATTGTTTATAATAGCAAAAAACTGGAAACTACTAAAATATCATATAATATGGAATTA

GTTATGTGACAAAAGAGCTGTGGTACTAGACTGCCAAAGAACATTGAATGACACAGACATTCATGATATAAAACTATTAGAATCCTGTT

TTTATTAGGCAAAATCCTATTAGATATCTAAATAGATACATTTCTATTTT|GA|AGGTTGGGCTCTTCAATGTTTTTTTGCACATGGTG
 >chr15:66728354-66728723 + E=3e-21
TTCACTCCTGTGCCCATAATTTTTTTGTGTGCTGTTGCTTCTGTCTTTTCAAACAGTGCCCATTTTCTAGGTCCACCTCTTGTCTAGCT
0
TTTACCAGGTGCCCCAGCCCACACTGGTAACCACTGCATCCATGTTCTCTGACACTCGCTGTCTGTGGGATTTTTTTAGAAGTTCAACC

TTACTACGTAACTATTTAATGTGACTGTCACTTGTCTCCCCAGCTGGAACAAGGGAAAATGTTAGGATGACATAAGGTAGCACCTTAGA

CTTTGGCTTAGTCTCAACCACATCAGGCTCCTGAGCTCAAGGAAGAATCTTTTGGGCAGCCTAGGTT
