# Supplementary material for: Chromothripsis during telomere crisis is independent of NHEJ, and consistent with a replicative origin
Source: HighWire-hosted journal article supplement (doi:10.1101/gr.240705.118), 2019-03-14
Supplement: Supplemental_file_1.zip [file contig.2.DB78_length_703_mean_cov_12.1564722617.docx]

**DB78_length_703_mean_cov_12.1564722617**

CCATAAAATACACCAAATATATGCACTATAGTTTATTTAACCTGTTCCCGAGTGTCTGTGAGTATATCACTGTATTTGATTTTTCATGT
 >chr6:159109157-159109534 + E=5e-215
TATAGATAACTCTGTGATGAACGTCTTGTACAGGTATTTTGACATGTCTGTTTATTTTTGGGGGGTAAATTCTTAGAAGAATGATTGGT

CAAGTGTATGAATACTTGAAAGGCTTTTGATGTTTTGCCAAATTACCCTCTGGGAGTGTGTGCTTATTTACAACAGGCTGGCAGGGTAC

ACAAATTTCCTTCTTCCCACACTCTGGCCCCCATTACATTCTGAGCTTTGAAGCATGATTTCAAATTACATTCACGTAAAAAACTAGAC

GCCAGGCTCAGTGGCTCATGC|TAACTCTTTACAATCATCAGGAGGCCCTATCTAATTTTTTTTCCTCCCAATCCTTGATGTTCCTGGT
 >chr6:159110979-159111305 + E=2e-184
ACCATTTGTTACATAACCATTCCCTTTCCCATTGCGTTGTAACCCAGGGCCACTGATTGGCACAGCGTGGGGCACCACTCTCCTTGTGC

CCAGCCCTGCGCTCCAGCGGGTGCTGTCTCATAGAGGACACACGGTGCCCTCTCCTTCACCTGCAACTCTTGGCAATTTGGCCCTAGCC

AGATTTTGAATGTTTGAGAGCAGGAGCTATGAGTAAAGGAATAAGTGAATAAATAAATTGAGCAGGGATCTGCTCATTTGG
