# Supplementary material for: Chromothripsis during telomere crisis is independent of NHEJ, and consistent with a replicative origin
Source: HighWire-hosted journal article supplement (doi:10.1101/gr.240705.118), 2019-03-14
Supplement: Supplemental_file_1.zip [file contig.2.DB78_length_727_mean_cov_8.35625859697.docx]

**DB78_length_727_mean_cov_8.35625859697**

CCCATGGTGGGGAGCGGCCGGCTTGGAGCCCCTGTGGGACGGAGTGGAGGTGGAGCAAGTGCCCGGAGCTCTCGGCCATCATGTGCGAA
 >chr16:863402-863742 + E=9e-190
TGTTTTGCTCCGTGCTGACGCCTCCCTCGGCACCGTCCTGTCTGTGTTGTGGACTGGGCAGCTCTCACGGGGTTGGGCGCTTCTGCCCC

CGGGGGACGCTGGCCGGCATCTGGAGACGTCTGTGATCTCCGCTGGTGTTGCCGCAGGCATCTGGCTGGTGGAGCCCGGGGAGGCCGCC

CAGGACCCTGCGACCCGCAGGACCGCCACGCCGCGGAGGACGGCCAGCCCCGAACCCCCAGCGCCCGGGG|CAC|GGGCAAGGCGGTCC
 >chr16:779308-77
CCGCCTTCGTCCTGGAGGCGCTATGCAAGGAGCGGGCGCGCTTCGAACAGGCAGGCGAGCCGCGGCAGCCACAGGCGCGGGCCCTCCTT
9698 + E=8e-214
GCGCTGCAGTGGGGGCTCCTGAGTGCAGCCCCACACGACTGAGCCACCCAGACCCTCACAGGGCTGGGGCCTGCGTCCCTCCTCGTGAC

CTCGGCCAGCTGGACCCACATGAGGGCCACCTCTGGAACCTTCTTCGAGGCCCTGGCCAGCCATCTGCCCAGCCTCGGAGGGTGGGCAA

CCTGGTGCTTCCCGGGTGGACACACAGGACCACTCAGTGGGGCCTGTGTGGGCGCCGAGACCTGGGTGTCTGGGAAGTGGGGCACACGG

GGCCTCCGAACTATGAA
