# Supplementary material for: Chromothripsis during telomere crisis is independent of NHEJ, and consistent with a replicative origin
Source: HighWire-hosted journal article supplement (doi:10.1101/gr.240705.118), 2019-03-14
Supplement: Supplemental_file_1.zip [file contig.2.DB79_length_264_mean_cov_3.97727272727.docx]

**DB79_length_264_mean_cov_3.97727272727**

TATTTTGAATTATTTATTTCACAGAAGAGACGAGGAAAGTAGGGAGAGGAAGGAAACAAAGAGGAGG|C|ATCTCTTTCTGTGTCCACA
 >chr6:125543689-125543757 - E=1e-29 >chr7:151420150-151
GCCCCGGCTCTGAGAGGTGGACCACAGTGACGTTGTGCATCTCCTGGGCTGAATGTCAGTTTAGAATCAGTGTTCTGTCACCTCCAATA
420347 + E=1e-107
CCCTTTCCCTAATGCCCAGTTGCCCTGGTAAAAGCCATAAGTCCCTTTGGGGAAGAACGGGAGAGAGGTTAATAGTATACATTTTTGG
