# Supplementary material for: Chromothripsis during telomere crisis is independent of NHEJ, and consistent with a replicative origin
Source: HighWire-hosted journal article supplement (doi:10.1101/gr.240705.118), 2019-03-14
Supplement: Supplemental_file_1.zip [file contig.2.DB79_length_266_mean_cov_14.5676691729.docx]

**DB79_length_266_mean_cov_14.5676691729**

GGGGGGCCCGGGGGGGGGGGGCGCGTCCGGCGCCGCCGTCCTTCCGGTTCGTCTCCCCCCCCCCGGGCCCC|CCCCGGGGGGGGGGGGG
 >chr2:223731463-
GGGGGGGGGGGGGGGGG|GGGGGGG|AGGGCGCGCGACCCCGGTCGGCGCGCCCCGCTTCTTCGGTTCCCGCCTCCTCCCCGTTCACCG
223731504 - E=2e-07 p=3e-02 >chrUn_gl000220:118545-118706 + E=9e-83
CCGGGGCGGCTCGTCCGCTCCGGGCCGGGACGGGGTCCGGGGAGCGTGGTTTGGGAGCCGCGGAGGCGGCCGCTCCGAGCCGGGCCCGT

GG
