# Supplementary material for: Chromothripsis during telomere crisis is independent of NHEJ, and consistent with a replicative origin
Source: HighWire-hosted journal article supplement (doi:10.1101/gr.240705.118), 2019-03-14
Supplement: Supplemental_file_1.zip [file contig.2.DB79_length_283_mean_cov_8.57597173145.docx]

**DB79_length_283_mean_cov_8.57597173145**

GATTCTTCTGCCTCAGCCTCCCGAGTAGCTGAGATTACAGGTGTCGCGCCACCATGCCCGGCTAGTTTTTTGTATTTTTAGTAGAGATG
 >chr17:76843670-76843862 + E=6e-90
CGATTTCACCATGTTGGCCAGGCTGGTCTTGAACCCCTGACCTCAGGTGATCCACCCTCCTTGGCCTCCCAAAGTGCTGGGATTACAGG

CGTGAGCCACCGCGCCT|ATATATATACTATATATATACAAATCTCTT|AGGGGTTCTAAGAGATTTGAGCCGACCACGTGGGGTGGGG
 >chr17:76871792-76871850 - E=1e-23
CTGGGGCTGGGGCTAGGA
