# Supplementary material for: Chromothripsis during telomere crisis is independent of NHEJ, and consistent with a replicative origin
Source: HighWire-hosted journal article supplement (doi:10.1101/gr.240705.118), 2019-03-14
Supplement: Supplemental_file_1.zip [file contig.2.DB79_length_286_mean_cov_2.62237762238.docx]

**DB79_length_286_mean_cov_2.62237762238**

CATTCAACGAACATTTAATGAATGCCTACTATGTGTCAGACAGG|TA|TCAAGAGAAGCAAAACAACACATGGTAGGTTCAGAGGGAAA
 >chr7:129431724-129431770 - E=2e-16 >chr7:7081329-7081571 + E=7e-135
GCTGAGGGCAGCATCTCTGTAATTTTTGAGATTCGTGGATAGCCTCTCTAATTACGAATATCTCAAAATTGTGCAAAACAGAGAATACA

TTTGCTGGCAAGATGGCCGAATAGGAAGAGCTCTGGTCTGCAGCTCCCAGTGAGATCGACACAGAAGGCAGGTGATTTCTGCATTTCCA

ATTGAGGTACCCGGTTCATCT
