# Supplementary material for: Chromothripsis during telomere crisis is independent of NHEJ, and consistent with a replicative origin
Source: HighWire-hosted journal article supplement (doi:10.1101/gr.240705.118), 2019-03-14
Supplement: Supplemental_file_1.zip [file contig.2.DB79_length_293_mean_cov_5.63139931741.docx]

**DB79_length_293_mean_cov_5.63139931741**

GTAGTTGGAGGCTGTGCCAGCTTGGGGTGGGGCCACCTCAGTGTTCCTTTTTTTTGAGACAGAGTCTCACTCTGTCACCCAGGCTGGAG
 >chr11:61970009-61970108 - E=2e-43
TTCA|GTGGC|AGCACCATTTTACACCCCCATTCCTGCCAGTAATATATGAGGGTACAGAGAGCTCTTTTGGTGGCACCTAAGAACTGT
 >chr7:141809199-141809400 - E=5e-105
AAATAACAGTGTTCACAGTAGTGAATCTTTGTGTTTGCTTCAAATGCTCAGTATGTGGAAAAGCACACATACACACACACACGGAGAGA

GAGAGAGAAAGTGAGAGAGAGAGAGGGA
