# Supplementary material for: Chromothripsis during telomere crisis is independent of NHEJ, and consistent with a replicative origin
Source: HighWire-hosted journal article supplement (doi:10.1101/gr.240705.118), 2019-03-14
Supplement: Supplemental_file_1.zip [file contig.2.DB79_length_311_mean_cov_4.34083601286.docx]

**DB79_length_311_mean_cov_4.34083601286**

AAAGGAGTGCTTGAATTTGACTTTAAAAACTGGAGTACCATAGTGCAGTGCTT|AA|CAATGGATTTCTGGATCCCTCCTCATTGCTTT
 >chr6:140030970-140031025 + E=1e-21 >chr6:140035088-140035346 - E=2e-
TGAATCAAAATTTCTGGGAATGCATTCCAAGAATTTGAATATCATCCAACATCTGGGCAATTCTTACATTCAGTAAGTCTGAGTATCTC
144
TGCCCTAAGCCAAGCACATGGTTAGCCACAGTAACAGTGGCTCACACATTTACTGATCTTTGAGACCATCAGGAATTTTCAAACATCAG

TGTGCCTAAAGAGAAAAAAACACGATTCACGTCTTAAATACGAAAA
