# Supplementary material for: Chromothripsis during telomere crisis is independent of NHEJ, and consistent with a replicative origin
Source: HighWire-hosted journal article supplement (doi:10.1101/gr.240705.118), 2019-03-14
Supplement: Supplemental_file_1.zip [file contig.2.DB79_length_319_mean_cov_7.5329153605.docx]

**DB79_length_319_mean_cov_7.5329153605**

CATGATCCACCCGCCTCGGCCTCCCAAAGTGCTGGGATTACAGGCGTGAGCCACCGCGCCCGGCC|TAT|TTTTTTTAAAAGTAGAGAC
 >chr2:62457361-62457429 + E=1e-29 p=0e+00 >chr19:3944790-394504
AGGGTCTTGCTATATTGTCCAGGCTGATCTCAAACTCCTTGGCTCCTCCAGTCTCAGCCTCCCAAAGTGCTGGGATTCACAGGTGTGAG
9 - E=3e-135
CGACTACGCCCAGCTTCCTCCCTCCCTCCCTCCCTCCCTTCCTTCCCTTTTTTTTTTTTTTGAGATGGAGTCTTGTTCTGTTGCCCAGG

CTGGAGTGCAATGGCGCAATCTTGGCTCACTGCAACCTTTACTTCCTGGGTTCA
