# Supplementary material for: Chromothripsis during telomere crisis is independent of NHEJ, and consistent with a replicative origin
Source: HighWire-hosted journal article supplement (doi:10.1101/gr.240705.118), 2019-03-14
Supplement: Supplemental_file_1.zip [file contig.2.DB79_length_370_mean_cov_11.5432432432.docx]

**DB79_length_370_mean_cov_11.5432432432**

GAAACCTCCGCCTCCTGGGTTCAAACAATTCTCCTGCCTGAGCCTCTCAAGTAGCTGAGATTAGAGACATGCGCCACCACACCCAGCTA
 >chr6:150013887-150014023 + E=2e-67 p=0e+00
ATTTTGTATTTTTAGTAGAGACGAGGTTTCTTCATGTTGGTCTGGCT|CA|TACAGGTGCCCGCCACTATGCCCGGCTAATTTTTTGTA
 >chr6:150014874-150015106 - E=3e-122
TTTTTAGTAGAGACGGGGTTTCACCATGTTGGCCAGGCTGGTCTTGAACTCCTGACCTCAAGTGATCTGCCTGCCTCAGCCTCCCAAAG

TGCTGGGATTACAGGCGTGAGCCACCGCGCCCAGCTAGTAGTACCAATTTATATTCTCCCTATCCGTTTACTATGAGAATGCCTATGTT

TGTAAAGCCTCGGTAT
