# Supplementary material for: Chromothripsis during telomere crisis is independent of NHEJ, and consistent with a replicative origin
Source: HighWire-hosted journal article supplement (doi:10.1101/gr.240705.118), 2019-03-14
Supplement: Supplemental_file_1.zip [file contig.2.DB79_length_376_mean_cov_5.96808510638.docx]

**DB79_length_376_mean_cov_5.96808510638**

CATAGTTTCCGAATGGAATGCATGTATTTGTAGGCCAATGCAGAGAAAGAATTTTTGACAGTCTTCTGAGCAGTCTCCTTGAAACTAAA
 >chr22:18209042-18209320 - E=3e-145 p=3e-02
AAATCCTAAGTTAATATACATTCAGTGTAATTCACACACAGGCTGAGAGCATCCTAATCTGAAAACCTGAAATCTGAAATGATCCAAAA

TCTGAGGTTTTTTTTTTTTTAAGATGGAGTCTTGCTCTGTCTCCCAGGCTAGAGTGCAGTGGCACAATCTCAGCTCACTGCAACCTCCG

CGTCC|GGAGGAGCGGCGAGTCGGGTACGTGAGCCGGCCAGGGAGCAGGGCTCGGAGGCCGGCACA|ACCACACCAGGCTAATTTTTGT
 >chr4:17554562-175546
ATTTTTAGGAGAGATGAGATTT06 - E=5e-12
