# Supplementary material for: Chromothripsis during telomere crisis is independent of NHEJ, and consistent with a replicative origin
Source: HighWire-hosted journal article supplement (doi:10.1101/gr.240705.118), 2019-03-14
Supplement: Supplemental_file_1.zip [file contig.2.DB79_length_376_mean_cov_15.710106383.docx]

**DB79_length_376_mean_cov_15.710106383**

TCTCCTCAAGATATCATTAAGAATAAGATCTTACCTGCATTTGTTTCTCAGTCCTCTGGTGTCAAGTCCTTCTCCTTGAACCATTCAGT
 >chr19:42357368-42357590 + E=3e-122
ACATAGGAAAACCTGTTGAGCTATTCCAAAGACATGAAGCCTGGAGACCCCCTTCCCATTCCCACCCTTAGAAGGGGCTCAAGGGATGT

GCTTGATCACTGATTCTTTTTCCTGATGTTACCTACACCCCTT|G|CCTGGGCAACACGGTGAAACCCCCTCTCTACTAAAATACAAAA
 >chr19:42360771-42360926 - E=7e-82
AATTAGGCCGGGCGCGGTGGCTCACGCCTGTAATCCCAGCACTTTGGGAGGCCGAGGCGGGCGGATCACGAGGTCAGGAGATGGAGACC

ATCCTGGCTAACATGGTGAAAC
