# Supplementary material for: Chromothripsis during telomere crisis is independent of NHEJ, and consistent with a replicative origin
Source: HighWire-hosted journal article supplement (doi:10.1101/gr.240705.118), 2019-03-14
Supplement: Supplemental_file_1.zip [file contig.2.DB79_length_402_mean_cov_7.08955223881.docx]

**DB79_length_402_mean_cov_7.08955223881**

AAGTTGGGATTATATAGCTAGGCCTTTATGACTCTGCATCAATCAGTCGTTGGTTAAGGAGTGTAACGTTAGACAAGAAAAGTCCTCAG
 >chr7:7081071-7081328 + E=2e-143
CTGAAAGCAGTGAATGGAGGGCTCTCAACCAGCAGTACTCGGATATGGCTGGTGCACCACACCAGCCTATCCTATGCAAAATGGCATAG

TTCCCTCCAATAAGTTCCTGTTATAACAGTTCCCTGATCCCCACTCTTCCTGGAGCCACTGACAGCTAACAGCAATAA|A|CTTGACTG
 >chr7:11
AAGGGAAAAATGGAAGATGGTAGACATCCTCTCAAGTGGATGTAGGAGGTAATTAGAATAATAAAATTGAATAATTATTAAGTAGTTTG
4641092-114641238 + E=2e-76
CTCAAGGATATTAATCATTCTGCCCATTTTGAAGGAGAAAAAATATTC
