# Supplementary material for: Chromothripsis during telomere crisis is independent of NHEJ, and consistent with a replicative origin
Source: HighWire-hosted journal article supplement (doi:10.1101/gr.240705.118), 2019-03-14
Supplement: Supplemental_file_1.zip [file contig.2.DB79_length_409_mean_cov_4.89486552567.docx]

**DB79_length_409_mean_cov_4.89486552567**

ATTTTTTAAACTTGTATTTGTAATCTTAGAAAATGTGGGCAGTGGGGCTGGGCATGGTGGCTCACACCTGTAATCCCAGCACTTTGGGA
 >chr9:132479648-132479831 + E=2e-94 p=3e-02
GGCCGAGGCGGGCAGATTGCTCGAGGCCAAGAGTTCGAGACCAGCCTGGCCAACATGGTGAAACTCTGTTTCTACTAAAAATACAAAAA

TTAGC|A|CCTTAAAAATCAAATTTTTTTGAGATTATATTATTTCTAATTGTTAAGGTGGTAGAAATCGTATATGAGCATGTACTTTAT
 >chr2:14166694-14166920 - E=1e-121
ACTTATATTTTATTTTTCCTTAGAATAAATTCCTGTAAACTGACTTGATGGGTCAAAATTAGTAAAGTTATTAAGTTTCTTTACTAACA

AAATCCTATTTGTATGTTTATATATATGAAAAATTTACAACTATTCATAATCCTA
