# Supplementary material for: Chromothripsis during telomere crisis is independent of NHEJ, and consistent with a replicative origin
Source: HighWire-hosted journal article supplement (doi:10.1101/gr.240705.118), 2019-03-14
Supplement: Supplemental_file_1.zip [file contig.2.DB79_length_414_mean_cov_7.97101449275.docx]

**DB79_length_414_mean_cov_7.97101449275**

GAACAGGGTTTCAGCCATCATTCCCTCAGGTATGATGGCGCCGTTATATCTTTTTATCCAGTATACCTGGGTTCAGCTGTTTGCACCTC
 >chr9:93722674-93722996 - E=2e-170
CAAACATCCAATCACTGTTTTCACATTTTTGAGTTTTATGGAATGTGGACAAACTGGAGATCTTTTGTGCTCAGAAAACATTTCAAATT

TCTGCACATCACCTGGCCCTGTGTTTATGTGGGGCTTTGCTCTGTCACATTCTAGAAAGCTCTGAGCCCCTGTGTCAGTTGCCGGCCGA

CCTGACTCATGGTCCTGCTCCTCCTCACAGCAGGGTGTGGACTCAACAGACC|CAG|GTGTCCCCACACTCAGGACTCATGTTGGAGCC
 >chr9:95926797-95926892 + E=1e-45
CTGGGCCCTTACGGTGGGGCAGGAAGACGCCAGCCCCGGTGTGGGCAGTTGGCAGAAAAG
