# Supplementary material for: Chromothripsis during telomere crisis is independent of NHEJ, and consistent with a replicative origin
Source: HighWire-hosted journal article supplement (doi:10.1101/gr.240705.118), 2019-03-14
Supplement: Supplemental_file_1.zip [file contig.2.DB79_length_423_mean_cov_4.25531914894.docx]

**DB79_length_423_mean_cov_4.25531914894**

TTCAGTTCCCAGTGATCTTACATTAAACATTTGTCTGTCTAAAACAATAGGTTAACTATAGCCAAATTATAACCATACCATTCCTCTCC
 >chr7:116338463-116338697 + E=2e-129 p=2e-02
ACACAAAATCCTATAAACAGCATGTGATCATATTGCTTCTAGAATTTATGATTGTTTTCTTCCAAAAGGAAGCTAAATTTAGCCTAGTA

ATTCTACATGCGCTCAAGAAAACAATGCCTGCTGTGATTTCTAGAATAAATGAAT|G|ACAAAGATGGTCTCTTTATTTACTTGAATAA
 >chr7:116331241-116331431 - E=7
TTACTTTAAATATTTCACTTTGCATTTGAAAACATATCTATTAGTTAAGATTTCTGAGGTGGTATACTAGTATTTTCTTATTATATAAT
e-100
TCTAAAATCTTCTACAATATTTACATAAGATAATCTCAAAATGGAAATAATGGATCTAAGTAAAGAGTT
