# Supplementary material for: Chromothripsis during telomere crisis is independent of NHEJ, and consistent with a replicative origin
Source: HighWire-hosted journal article supplement (doi:10.1101/gr.240705.118), 2019-03-14
Supplement: Supplemental_file_1.zip [file contig.2.DB79_length_448_mean_cov_17.703125.docx]

**DB79_length_448_mean_cov_17.703125**

AGTCTTCCCCAAGCCTTTTCTACTCCTCCCATCTGGAGTTTATCATTCCCTGCTCTGGGTCTTAATCATTTGTGTAGTCTCTTCTTATC
 >chr10:98175132-98175532 + E=1e-223 p=0e+00
ATACTGTATTGTTTTTCTTAAGGAGTGATGGTATTTGTCTTCTTTGCTAAAAGTAAGTTCCTCAAGCAGAGAGACTGGGTGTTTTATCT

CTGTCCTTAGAAACTACAGCACAGCAGACCTCAAAAAATGCTTCTTGAATTAAATATGCAATCAGGATAAAGCACTGTCTTTTAAAAAC

TTTGCAAAATAGTTATTTACATCCAAAATGGAAGTGAAAATGTACATATGTCACCTAGCTATTAGCTGTGCATGCTCTCTCTCTCTGTC

TCTCTCTGTCTCTCTCTCTCTCTCTCTCTCTCTCTCT|CTCTCTC|TCTCTCTCTCTCTCTCTCTCTCTCCCCCCTCCGGCCCCCT|AC
 >chr2:168813206-168813253 + E=1e-07
ACCCCT
