# Supplementary material for: Chromothripsis during telomere crisis is independent of NHEJ, and consistent with a replicative origin
Source: HighWire-hosted journal article supplement (doi:10.1101/gr.240705.118), 2019-03-14
Supplement: Supplemental_file_1.zip [file contig.2.DB79_length_449_mean_cov_6.34743875278.docx]

**DB79_length_449_mean_cov_6.34743875278**

TGGCATGAAGGCCTCTGGTGATCAGATTAGCCCTCTGTGACTTTCCCCTCCCCTGGGTTCCCATAAGAAATGGCTGAACCACTCCTTTG
 >chr1:180126944-180127125 - E=2e-94
GCCTTTTTCAAACACAGCTTTGTAACAGTTGCCAATTTTCCTTCTATGAGTAGCTCATTTCCCCAAATGCAATGCAAACAATGCTTA|T

CACT|GGATAATTTACTTGTTGCAGCATCAAACCCAGCAGTGGCCTATGGACAAAGCGCAGAGCCAGGGGCTTACACAGGGGACAGAAA
>chr1:180220495-180220768 - E=8e-147
AATGAGTAACAGATAGGCCTTTTCCTCAAGCCAACAAGGAAGATAAACCAGGCACACGAGAAATGGGCAAACCAAAGCATTNTGTGCTG

GGTCACCCGGGAGAGGGGAGAGACAGGAAGTGATGGCTCCACTGGGGGTCCTGTCTGCCGCGGAGCTGGACTCTGAGGACCCTGGAAGG

ATGGAA
