# Supplementary material for: Chromothripsis during telomere crisis is independent of NHEJ, and consistent with a replicative origin
Source: HighWire-hosted journal article supplement (doi:10.1101/gr.240705.118), 2019-03-14
Supplement: Supplemental_file_1.zip [file contig.2.DB79_length_450_mean_cov_16.8733333333.docx]

**DB79_length_450_mean_cov_16.8733333333**

GGCAGGTG|GATCACCTGAGGTCAGGAGTTCGAGACCAGCCTGGCCAACATGGTGAAACCCCATCTCTACTANAAATACAAAATTAGTG
 >chr14:42203299-42203456 - E=8e-41 p=0e+00
CTCACCTGTGATCCCAGCTACTCAGGAGGCTGAGGCATGAGAATCACTTGAACCTAGGAGGCAGAGTTTGCTGTGAG|TTTGCTAAGAG

TTTG|CTAAGAACTGAACATATCCTGTCCTCCTAAAATTGGTTTGTGTTTGAGGGAAATTATCTAAAGACTTGAGTAGTGGCTGCATAT
 >chr20:35935519-35935789 - E=5e-151
TACAATCACCTGGACACTTTAAAAAAATACTGATCCAAGCCGGGCACACTGGCTCATGCCTGTAATCCCATCACTTTGGGAGGCCAAGG

TGAGAGAATCACCTGAGCCCAGGAGTTCAAGACCAGCCTGGGCAACATAGTGAAACCGTGTCTCTACAAAAAAATTATTTAAAAATTAG

CCAGGTGT
