# Supplementary material for: Chromothripsis during telomere crisis is independent of NHEJ, and consistent with a replicative origin
Source: HighWire-hosted journal article supplement (doi:10.1101/gr.240705.118), 2019-03-14
Supplement: Supplemental_file_1.zip [file contig.2.DB79_length_458_mean_cov_5.89519650655.docx]

**DB79_length_458_mean_cov_5.89519650655**

GGATTGTGATATTTTCCTGTTGAACTAGTCCATTTATCACTATATAATGTCCCTCTTTGTCTTTTTTAACTGCTATTGCTTTAAGGTTT
 >chr7:115717589-115717787 - E=1e-107 p=1e-03
TTTTTGTCTGATATAAGAATAACTACTCTTGCTTGCATTTGGTTTCCATTTGCATGGAATATCTTTTTTCACCCCTTTACCTTAAGTTT

ATATGAGTTCTTATGTG|TTA|CTTTGGATTTAATCTATCTCCTTTTTCTAATGTGTTAAGGTAGAAGCTGAAGTCTTGGACATGTGAT
 >chr7:115698803-115699066 - E=9e-144
CTTTATTTTTTTAAATACAGGCATTTAGTACTAAAAATTCGTCCCTCAATATTGCTTTATCGGCATCTCACAAATTTAAGTCTGTTTTA

CTCCTGTCTTCATTCAGTTCAAAAATACTTTCTAATTTCCCTTTTTATTTTTTTGAACCATGGGTTATTTTAAAGTATATTATATTATT

TTGCTCTAAATATTT
