# Supplementary material for: Chromothripsis during telomere crisis is independent of NHEJ, and consistent with a replicative origin
Source: HighWire-hosted journal article supplement (doi:10.1101/gr.240705.118), 2019-03-14
Supplement: Supplemental_file_1.zip [file contig.2.DB79_length_473_mean_cov_10.600422833.docx]

**DB79_length_473_mean_cov_10.600422833**

ATACATGCGCCATGCTGGTGTGCTGCACCTATTAACTCGTCATTTAGCATTAGGTATATCTCCTAATGCTATCCCTCCCCCCTCCCCCT
 >chrY:59028951-59029132 + E=3e-79
ACCCCACATTGCCCTTGTCTCCCAGGCTGGAGAACAGTGGTGCTATCTCGGCTCACTGCAACCTCCGCCTCCTGGGTTCAAGCAATTCT

CC|T|ATATATATATAAAACAAGAGCTTACAGAACAGGCAGCACCAAGTGGGAGCTGGGGGGCTTGTCTTGATGTTGCATTTGATAAAT
 >chrY:59030574-59030867 + E=8e-153
ATACACCGTTTTTACTCAGATTATATTTTTGCTTAGATTTGGGCTAAAGATCCCCAAAGCTGCCCCTTGGTATTGACACTCATTAAGAA

ATTAAGGAAGAGATAGTACTATTGAACTATTTTCCAAAAAAAGAAAAAAAAAAGACAAAAACCCAAAACAAATGGGATGTGATGTACAT

TTTCCATGTTATTTTATACATGAGCTATCT
