# Supplementary material for: Chromothripsis during telomere crisis is independent of NHEJ, and consistent with a replicative origin
Source: HighWire-hosted journal article supplement (doi:10.1101/gr.240705.118), 2019-03-14
Supplement: Supplemental_file_1.zip [file contig.2.DB79_length_475_mean_cov_21.0315789474.docx]

**DB79_length_475_mean_cov_21.0315789474**

TAGAGATGGATGGTGGTGATGTTGCACAACAATGTGAATGTACTTAATGCCACTGAACTGCACACTTAAAAGGCTAAGATAGTGAATTT
 >chr2:7697454-7697708 + E=2e-141
TATGTTAGGTATATTTTACCAAAATTTAGAACTTTTAAAAAGGAAAATATCATCTACTGGTCTTTAGAGTACAGACTTCAGAAGCCCAA

CATAAAATCATGCAGACCTGTAGGAAGCTGTTGCCTATGTCCAGCCCCAGACATGATAGTAGCTTGCACTATTA|GT|ATCGTTTGGCC
 >chr2:741635
TGGAAGCATTTCAAATTAGGAAGTGGGCTATTAAGGGAAATAGTTGTTCCTACTAATGCCACGTAGACAAGTTCTATGGCAGGGCTTTG
7-7416580 + E=1e-122
CGCTAGCAATCACAGGTAAAATGACACGAGTGTATTATTTTAGCTAGCACAGATTGTAGACAGATTCTCCCTAATATGTTAGAAAGGCC

TCCTTATAATCTCATGATAGAATCATTCACTT
