# Supplementary material for: Chromothripsis during telomere crisis is independent of NHEJ, and consistent with a replicative origin
Source: HighWire-hosted journal article supplement (doi:10.1101/gr.240705.118), 2019-03-14
Supplement: Supplemental_file_1.zip [file contig.2.DB79_length_482_mean_cov_6.78630705394.docx]

**DB79_length_482_mean_cov_6.78630705394**

TTTTGTATTTTTAGTAGAGACAGGGTTTCACTATGTTGGCCGGGTTGGTCTCGAACTCTTGACCTTGTGATCCACCCGCCTCGGCCTCC
 >chr9:123603065-123603218 + E=2e-80 p=0e+00
CAAAGTGCTGGGATTACAGGCGTGAGCCACCGTGCCTGGCCTAACTTTTGTATTTTTAGT|AGAG|TTCAGGGTTGCAGTGAGCTATGA
 >chr9:114293399-114293707
TCATGCCACTGCTGCCTTCCAGCCTGGGCAACAGAGCAAGACCCTGTCTCTAAAAAAAATAGAATAAATGTAATCTCCCTTTCAAGGAA
+ E=7e-171
CTGACGCCTCATTTTCCACATGCAATTTTGTTTCAGTTCACAGAATGCCATGAGTCTGATTGTAATGAAACAAAAACACTTACTAAAAT

TCAGCAGTTACCACTATTAAAATTAGTCAGGTGAAATAGAAGTTCATTTCCTTCTTTTTTTTTCTTTCTTGAGACAGAGTTTTACTCCG

TTGCCCAGGCTGGA|AGATCGGAAGAGCGTCGTGTAGGGA
