# Supplementary material for: Chromothripsis during telomere crisis is independent of NHEJ, and consistent with a replicative origin
Source: HighWire-hosted journal article supplement (doi:10.1101/gr.240705.118), 2019-03-14
Supplement: Supplemental_file_1.zip [file contig.2.DB79_length_493_mean_cov_5.47667342799.docx]

**DB79_length_493_mean_cov_5.47667342799**

TACAATTCTGGAGGCCAGAAGTCTGAAGTCAGTCACCCAGGGTGAAAATCAAGGCATTGGTAGGGCATATTTTTCTGGACGGTCTGGGG
 >chr7:116282248-116282634 - E=6e-218
AAGAATTTGTTTGTTTGACTTTTCTAGCATCTGGGGACTGAACCCTTTCTTGTATCACTCCAATCTTAGGCTTCCACTGTCACATCTAC

TTCTGTAGTCCAATGTCTCCCTACCTCTCTTATAAGAACACTTGTGATTAAACTTAAAGCTTACTTGGATAATCCAGGATAATCTCCTC

ATCTCAAAACCCTTGACTTAATCACACCTTCACAGTTCCCTTTGCCAAGTAAATGAACATTCACAGGTTCCAGGGATTAGGATGTGGAC

ATCTTGGGAAGGGGACATTATTCAGCTGA|C|TTGGGAGTCAGTTCATTATTGTGGAAGGGGGTTTGTTAGAGAATCTGTTCACCTCTT
 >chr7:116427550-116427658 - E=2e-53
GCTCTCTCTTGCACTCTCTCACACCCATGTGATGCCTTCCACCATGTTAT
