# Supplementary material for: Chromothripsis during telomere crisis is independent of NHEJ, and consistent with a replicative origin
Source: HighWire-hosted journal article supplement (doi:10.1101/gr.240705.118), 2019-03-14
Supplement: Supplemental_file_1.zip [file contig.2.DB79_length_514_mean_cov_5.24902723735.docx]

**DB79_length_514_mean_cov_5.24902723735**

TATTTCCAAAACTTTTTCACCACCACCCAGAAACTCTGTAACCATGATGCAATAACCCCCGTCCTCCTCCTCCTAGCCCCTGGTAACCT
 >chr17:76844230-76844556 - E=1e-184 p=9e-03
CTAGTCTACTTTCTGTCTCTATGGATTTTCCTATTCTAAATATTCTATCATCCTGCATGATTCCACCTATGTTATGTCCAGCTCACTTT

GCACGTCTTCAAGGTCCATTGGTATTATAGCATGGATCCATGCTTCCTTCTTTTTCATGGCTAATATTCCATTGTGTGCATCTATTACA

TTTTGTTTATCCATTCATCCATCAGTAGACACTTGGGTTGCTTCCGCCTTTTGGCTATT|TGTAT|ACAGTCTCTATATATTTTCTTGA
 >chr17:76756966-767571
TAAATGGGATACCCACCTCCCGGGTTCAAGTGATTCTCCTGCCTCAGCCTCCTGAGTAGCTGGGACTACAGGCATGCACCACCACACCC
49 + E=2e-98
GGCTAATTTTTGTATTTTTTGTAGAGACAGAGTTTCAACATGTTGGTCAGGCTGGTCTCGAACTCCCGACC
