# Supplementary material for: Chromothripsis during telomere crisis is independent of NHEJ, and consistent with a replicative origin
Source: HighWire-hosted journal article supplement (doi:10.1101/gr.240705.118), 2019-03-14
Supplement: Supplemental_file_1.zip [file contig.2.DB79_length_531_mean_cov_3.28060263653.docx]

**DB79_length_531_mean_cov_3.28060263653**

CTTTGCCCTTGACCTTACAAACGTGTAGGAACGTTGCCCTCGCTTCAATTCCACAGCTCTGTTTGTTTTCACTCCATAATGGTTTGTTT
 >chr1:180222892-180223206 - E=2e-177
CTCAACTCTTCACAGAGATCCACATGGCAGGTTTCTCCCATGGACCACAGCCCACCCCGTTCTGCCAGGCTAACCCCCCACTAACTGAG

GAGCTCCAGGCAGTTAAGAGTCATCTCCATGGGAAGCTCTCAAGGCTGGTACAGGGGAGACCAGGAAAGCCAGCGCAGGCCCCGCCCTG

AGGGAACTCTGACTACCTGACCCTGCAGGGCTGCGGGTCAAGGGGCC|TATTTTACCTCAATAAAAAATTGTTTAGGAGGAGTAAAAAA
 >chr1:180196470-180196685 - E=1e-111
AATGCCAAAGTGTAAAAGTGGTTATCTGTGCAGTGGATATTTTATTTTATTCTCTTCGCTTTTTTCAGTTTTCTCCATGAGCACATTAT

TTTATAAAGCAGAAAAAAACTAATAAAATGCTTTTTAAAATATTAGGGAAAAGGTAAGGAAAGATACCAAAATCCTATTCAAAAG|CA
