# Supplementary material for: Chromothripsis during telomere crisis is independent of NHEJ, and consistent with a replicative origin
Source: HighWire-hosted journal article supplement (doi:10.1101/gr.240705.118), 2019-03-14
Supplement: Supplemental_file_1.zip [file contig.2.DB79_length_533_mean_cov_7.45590994371.docx]

**DB79_length_533_mean_cov_7.45590994371**

TTTTTTAGCTTCAAGGAGACTGCCCAGAAGACTGCCAACAATTCTTTCCCTGCCTTGGCCTACAACTACATGCATTCCATTCGGAAACT
 >chr22:18209228-18209394 + E=3e-67 p=0e+00
ATGTAGGTTTAAACAGTGTTTCATTCCTAGAACTTCAGTTTAGGAAAGAATTTGCTTTCCAGATTGATGTTTATGTT|CGAGA|CCAGA
 >chr
CTGGTCTCGAACTCCTGACCTCGTGATCCGCCTGCCTTGGCCTCCCAAAGTGCTTCTACAAAAGCTTTAGGTGATGGTCCCGCGTCATA
22:18130082-18130444 + E=2e-206
ATTACCTTTCATCCAATCTAGCTTTTTTTTCCCCCCGTCCATTCTCAAAACTGACAAATTTGCTTCTTTCAGTACTCTGGATCTGTGAT

ACTACAAAAACCACCTTGTTTTGCTACCGTATCCTTCCGTATTACTAGTGTTAGTGTTTTCACCTCTGCATTCCTCTCACCTAGTACAT

TACCTGGCATATAGTAAATATGTGTTGAATAAATACAGTTAAGGTCTAAGAGGAAGTGAAGACGGTGTACCCAATTAAGTGGTTGTGCT

G
