# Supplementary material for: Chromothripsis during telomere crisis is independent of NHEJ, and consistent with a replicative origin
Source: HighWire-hosted journal article supplement (doi:10.1101/gr.240705.118), 2019-03-14
Supplement: Supplemental_file_1.zip [file contig.2.DB79_length_552_mean_cov_7.0652173913.docx]

**DB79_length_552_mean_cov_7.0652173913**

CTAGAAACACATGGATATTCTCCACTTTTAAAAATTCCATATTGACCCCATGTTTCTCTCAGCTTTTGCCTTCCCTATCTCCTTCTCTT
 >chr7:141338902-141339191 - E=3e-159
CAAAGTCAGGTTTCTTGAAGGAGTAGCCTGTCCTTGCTGTCTCCACTTCTTTACATCACTTTTATTTCTTGACTTTCTTCAGTCTGGCT

TCAGCCACCACACTTTGGAGGCTGCCCAGCTTTTGGAGGCTGCCAAATTCGATGGATACTCTCTTGTCTGTATATTTAAAGTCTTTGCT

TTTGCTTCTCGAAACTCTTA|CT|AAAGTAGACCTCCAAAATCAGTTTTAGAGACTTAACTAGAGCAGGAGAAGCCTCTCAGGGATCAC
 >chr7:141341251-141341516 + E=8e-148
TGAATTCATCCTTCTGTGTGCCACCAGAGCAGGCCCAAGCAATGTGCCATCAATGGGCATAGCAGTCTCTGTGCACAGTCTTTCTGTTA

ACGTGACTGCTTTTGGTAGTGATGTTTTAGGCACAGAGATGCCATTTTTACCTCTATGTATAAGAAGCATGAAATAAATAAAATGAAGG

CAGAGTCAGCAGAAAGGTTG
