# Supplementary material for: Chromothripsis during telomere crisis is independent of NHEJ, and consistent with a replicative origin
Source: HighWire-hosted journal article supplement (doi:10.1101/gr.240705.118), 2019-03-14
Supplement: Supplemental_file_1.zip [file contig.2.DB79_length_572_mean_cov_14.1993006993.docx]

**DB79_length_572_mean_cov_14.1993006993**

AAGGTGGTGTTTTCGTGGCGGTC|GTAAAAAAAAACCTAGTGTTATTGAAGCCACTGAGTTTCAGGATCATTGTTAGTGCAGCATAACC
 >chr9:98456676-98456916 + E=1e-129
TAGACTTACCCTGACTGATACAGTTATTCTTTAAAAATGAACCTTTCAAAAACACCCATCTTCTCTAAGCTTTTATGGTATTTATGAAA

ACATCTCACACTCCCAATGCAGCCTATGTTTTCTTAACTAGTGTTCTAGGCAGTTCAGTTGTTATTTGTTTGTTTATAATGAGCTT|GC

CATTCAGGAGGGGTTTTTAGGTGCTCTGCA|TCCTGATCTCGTGATCTGCCTGTCTTGGCCTCCCAAAGTGCTGGGATTACAGGTGTGA
 >chr9:131880556-131880833 + E=7e-119
GCCACCACGCCCAGCGTATTTGGGTTGTTTCTAATTAATAAAAAATTTTTTTATTTGAGACAGAGTTTCGCTCTTCTTGCCCAAGCTGG

AGTGCAATGGTGTGATCTTGGCTCACTGCAACCTCTGCCTCCTGGTTCAAGCAATTCTCCTGCCTCAGCCTCCCAAGTAGCTGGGATTA

CAGGCATGCGCCACCACACCTGAATAATTTTATATTTTTAG
