# Supplementary material for: Chromothripsis during telomere crisis is independent of NHEJ, and consistent with a replicative origin
Source: HighWire-hosted journal article supplement (doi:10.1101/gr.240705.118), 2019-03-14
Supplement: Supplemental_file_1.zip [file contig.2.DB79_length_587_mean_cov_14.6030664395.docx]

**DB79_length_587_mean_cov_14.6030664395**

AATGTGGAAGTAAAAATTAAGAGTAAGCACTAAATCAGTAGAAACTTAATGTTTAGTTTTAAAATTAGCAGCAGAAAATAATGTATCAC
 >chr3:182271499-182271775 - E=2e-151
TTTAACAGAAAGTAGGAATGGGGAAAAAATGAAAGCGAAAGAAAAGAACAGTAAATAGAAAACACAAAATGAAATGGTAGAAATAAAGC

CGAATACATCAGTAATCATTAATTCTGGGAGGTTGAGGATGCAGTGAGCCATGATCATGCCATTGCACTCTAGCAGGGTAAGACCTTGT

ATATATAT|A|ATATGACAGCTCAGGTCTTTCCTCTATGCTCAGACTGGTGTGGCTCATCTTCCTTTGCTGCTTTTCATTTTCTGAACT
 >chr3:182355796-182356108 - E=4e-176
GCTGTCACCATTTCTCAGGAACCCTAGAACTGATGCCCTGGGCCTTTTGCCTTTCTTTCATTTCATTCCACCCTTGAGTGAAGGTTTGT

CTGTCTTTGTTTTGTTTGTTTGTTGGGCTTATAATTGTTGACAGAACCCTTGCAAACCTCTCACATAGCTTCTTGGGAAGAGCTGGTTG

GGGCACCACCTACCAGCCTGCACTTCCCTTTCTCAGAGTTTGGAAGCCCCCACCT
