# Supplementary material for: Chromothripsis during telomere crisis is independent of NHEJ, and consistent with a replicative origin
Source: HighWire-hosted journal article supplement (doi:10.1101/gr.240705.118), 2019-03-14
Supplement: Supplemental_file_1.zip [file contig.2.DB79_length_590_mean_cov_8.76949152542.docx]

**DB79_length_590_mean_cov_8.76949152542**

TACTG|AAGTGCTCTTCAGTCAGCTGTGGTGAATGCTGCCAACCCCAGAACTCACCCTTCAGGGCAGTGGGCTCCCCTCTGGCCCACGA
 >chr1:180295496-180295615 + E=7e-60
CAAGTCCAGAAGGCTATCCAAGGCTTGTCTGGTCCA|TA|ATTGGGTTTCATAATTGGTTTCCATGATTCCATAACATACTACCAAACA
 >chr1:180197233-180197697 + E=1e-261
ATTTAATCTACTTCCCTAAGCCACTTTTCTTTTGTTGGCTATTTAGGTTATTTTTCTCCAAAACATAATACTGTAATAAACATTTTCAC

GCATGAAACTTTTATAAAAAATTCTAGATTATTTCCGTGGAATAGACATTCAAAAGTACTACATAAACTAAAGGGTATGAAAAATTTAT

GAGTTTGATACATATTGCCAAATTTCTTTCCAAACGGATGTTAAGAGTTTATAAGCACCCAGCAGTACTGGTGAGTGTCCAAGCCCCTT

TCGCCAGTCCTGAACTCTAGGATGCCCCTCCCGCGCGTCGGGCATCTCACAAACAGAAAAAGCTGTGCACGTGTTGTTTTGTCTTGCGT

GTTTTTCACTGCAAATGAGGCTGGCGTTTCCCCGTGTTTGCTTACTAGTTATATTTCTA
