# Supplementary material for: Chromothripsis during telomere crisis is independent of NHEJ, and consistent with a replicative origin
Source: HighWire-hosted journal article supplement (doi:10.1101/gr.240705.118), 2019-03-14
Supplement: Supplemental_file_1.zip [file contig.2.DB79_length_603_mean_cov_8.17412935323.docx]

**DB79_length_603_mean_cov_8.17412935323**

CACAGAACTGGAACAAATGGTATATCATATTTTGTGTCAATATATATCTGATGGGATTTAAACATTTTATAATTTATATTTAGGTACAT
 >chr7:115691598-115691974 + E=1e-214
GTGTGTGCTTATGTATCTACACACATATATATGAATCTATATTAGCATAATCTAGATCTATTTCATGGAGGAGGAGGAAAGAGTAGTAT

CAATAATAGTAAAAATAGCTACAAACATTTATTGAATATTTATATCAGACACTGTGGTCAGTACTTTTCATGCACTATTGATTTAATTT

TCCTCAGAATTTTTGATAGGTACTATGTTATCATCTACTTTTTTCAGATAATAAAACTAAGGATTAGGTAAGTAACTTTTAGTGAGCCA

CAGGTTCTCAGGGCCTT|ATG|AGCCACCGTGCCCAGCAACATCTAAGTATTTAACAGAGTGTGACTACCTGACACACTCCTACTAAGA
 >chr7:115692760-115692990 + E=1e-126
AATGTCATGGGGGCCGGGCGCAGTGGCTCACGCCTGTAATCCCAGCACTTTGGGAGGCCGAGGTGGGCGGATCACGAGGTCAGGAGATC

GAGACCATCCTGGCTAACACGGTGAAACCCCGTCTCTACTAAAAAAATACAAAAAAATTAGCTGGGCTTGG
