# Supplementary material for: Chromothripsis during telomere crisis is independent of NHEJ, and consistent with a replicative origin
Source: HighWire-hosted journal article supplement (doi:10.1101/gr.240705.118), 2019-03-14
Supplement: Supplemental_file_1.zip [file contig.2.DB79_length_604_mean_cov_8.19536423841.docx]

**DB79_length_604_mean_cov_8.19536423841**

GGACCAAAACTCCCATCTTCCTCTGGAAATCTCTCCTCCCAGAGCCCCTACGCTGGCCTGGGGGCGCTGCTGCCCCTCACGTCCACAGC
 >chr9:138290736-138291098 - E=4e-203
TGGTGGCCCGGCTGCTCCCTCTGTATGCCTCATCTCCTCTTTCCACCCTCGTTGCTCAATGTTGCCCCCAACTCTAGCCTGGACCCTGA

AATGGTCCCCTTCCGGCTCCCTCAGGCAGTAGGTGCTCTCCCTAACTCCTCACTCTGACCACATCCGTCTCCACCAGAGCCCACAGCTC

CCCGGGCCCAGGACCCCCAGTGTGGTCCCCGCTCACCCGGCCTGGATGGCTTCTGCCTACCCAGAGCTGCCTAGTGTGGCTTCCCTACC

CGGCCC|A|TGTAATTTTCTTTTCATGTAGTCTCTTTGTTTGGCTTTGCTATCAGGGTAATGCTGACCTCACAAAATGAGTTTGAAAGT
 >chr9:123566667-123566908 + E=3e-127
ATTCTCTCTTCTGTTTTGAGGGGAGAGTTTGAGAAGGATTGGTATTAATTCTTCTTTAAGTGTTTGGTAGATGGCTTCAGCAGTTGGTG

GGAGATTTTTTATTGCTGATTCAATCTCTTTACTCTGTGCTGGTCGGTTCAGATTTTCCATTTCCTCATGAT
