# Supplementary material for: Chromothripsis during telomere crisis is independent of NHEJ, and consistent with a replicative origin
Source: HighWire-hosted journal article supplement (doi:10.1101/gr.240705.118), 2019-03-14
Supplement: Supplemental_file_1.zip [file contig.2.DB79_length_634_mean_cov_12.5394321767.docx]

**DB79_length_634_mean_cov_12.5394321767**

CTGTGCTATAAGAAATGTTAAAAGGAGTCCTTCAGACAGGTCAATTATATAAGTCACAAACTTGTGTCTACATAGAAAATGAAAGAGAC
 >chr13:83301915-83302249 - E=3e-189 p=4e-02
TCAGAGAAAGAATAAATGAAGATAAGGTAAAATCTTTTTCTCAATGTTAAATTATCTAAAGAATGACCGCGTAAAACAATAATAACAGT

AACAATGCACTGAGTAATTATAGCATATGAGTAAGTGAAATAAATGACAACAATATCAAAGGGTCTGGAGGAAGAAATTGGAGGAAAAA

AAACTATTGTATAAGGTTATAATCAAAGACAACAACACACCCACAGACACATACATACACACACAT|A|TGAAACGTATGAAAGCAGAA
 >chr13:82788135-8278
AAAGGGGAAAAGCTATGTGACAATGGCCTGAGCAATGATTTTTTCTGGATTTGACCCTGAAAGCACAGGCAACAAAAGCAAAAATAGGT
8436 - E=2e-169
AAATGGGATTATACCAGACTAAAAAATCTTCTGAACAGCAAATGAAATAGTTAACAGTGTGAACTAACAACCTACAGACTGGGAGAAAA

TATTTGCAAGCCATATATCTGATAGGGAATTAATATCCAAAATATATAAGTAGTTTACACAACTCAATAACAAACCAAACCAAAGAAAC

AAACAAGTAAAAG
