# Supplementary material for: Chromothripsis during telomere crisis is independent of NHEJ, and consistent with a replicative origin
Source: HighWire-hosted journal article supplement (doi:10.1101/gr.240705.118), 2019-03-14
Supplement: Supplemental_file_1.zip [file contig.2.DB79_length_641_mean_cov_16.6146645866.docx]

**DB79_length_641_mean_cov_16.6146645866**

CTCGTGTTTTGACCCATATCCTCAGGATTTTGATCTTCTTTCAGTTAATCTCTTTATGTTAATTCTTTCTTTTTTCTCTTTATGTTAAT
 >chr9:118642332-118642605 - E=2e-146
TCTTAATGCAACATCAATGAAACTTATAGTTATAAATCTTTTGGGAAAAGTGGTTTGCACTTCCACTGAATTACAGATCTGAGATATGG

GTGAATCTTTAAAGTACTGGTTCAATATCCTACCTGATCTTGAAAGAACTTGAGGTTTTTAGCTGAAGATCAGAGTGTCTGCTGTTCCA

GAGA|GC|TGATGAGTTAGAATCACCTGGCAAACTTTTAAGATTATTGGACCCTGCCTCAGATGTTCCCCAAGTTAAACTCTCTGAAAA
 >chr9:123541667-123542037 - E=6e-208
TAGGGACCTGCCTGTGTGTTTTGATAAAGTTGTATCACATGGCCATTGAGAACCAACCAAGTCCTACCCCTCTTTTTATACAGAAGGAA

ACAGTCTAAATAGCAAAGTGACAATAAATACAGTCTTTATTTCAGTATGCTATCATAGTTTTCCCAGGTTAAAATTCATACTCTAGCTC

TTTCATAAGTGATGGCTANTTTTCCATTGTCTCAAACAGTGGTTCTTGACTGAAGGTAGAATTGTGGCTGGCTTTAGTCATTTCAGCTT

TTTAAAAACTGGTCATTTGG
