# Supplementary material for: Chromothripsis during telomere crisis is independent of NHEJ, and consistent with a replicative origin
Source: HighWire-hosted journal article supplement (doi:10.1101/gr.240705.118), 2019-03-14
Supplement: Supplemental_file_1.zip [file contig.2.DB79_length_655_mean_cov_7.32824427481.docx]

**DB79_length_655_mean_cov_7.32824427481**

TATTTAATATGAATACTTCACATCAACCTGAATTGATAATGAGATATCTACCATAGCATAACACATTGACCTTGTAAAATACATCAACT
 >chr2:142642189-142642613 - E=2e-243
GCCTCCTCTGAGCCAATCAATCCATCCAAATACATTTACAGGTAAATTTTGTTTTCTGATGAATCATTTTTCAGCTGATTTCCTATTCA

CCGGGTTAGTGTGACCTCAAAGATAGTTTGCTTTATCTTATAAACATTAAGATACTTTATGCAGCATGAGGCTGCAAACAGAATGTAGG

GGCAATAATCTCTTCTGTGAGGGCAATTTGAGGAAGACTATCCACATCGGCCCATTCATAGTGACTTTTAGCTATGACATTCCAGACAA

ATGTTAAATATGTTCAGACATTGTCAACTGACAACATTTTAACATGAGTATGTTTAAAAGATTAT|TCT|TTTTAGAAGTGAAGTTTTG
 >chr2:142766915-14276
CAGAAACAACAGAATTGAGTGAGAGGATCCCATACAACACGTGCAAAAATCTGAAGGCCTAGCACCTTATAGAGAAATGCTGTATGTCA
7149 - E=5e-129
GTGTGTCAGGAGGGCAGGATGCATGTGAAGTATCAATGCAAGACGGTGCTTCAGAGATAGGCAAGAGTCAACTACTTTATCAGTAAACT

TCAACATGAGGAGAGGGTGAAAAAGGACATCTCG
