# Supplementary material for: Chromothripsis during telomere crisis is independent of NHEJ, and consistent with a replicative origin
Source: HighWire-hosted journal article supplement (doi:10.1101/gr.240705.118), 2019-03-14
Supplement: Supplemental_file_1.zip [file contig.2.DB79_length_663_mean_cov_14.185520362.docx]

**DB79_length_663_mean_cov_14.185520362**

CTTTCTTTTGTAAATTGCCCAGTTTCAGGTATGTCTTCATTAGCAGCGTGAAAATGGACTAATACATGAGGTTGCCTCTGGCATCTCCT
 >chr7:99532427-99532760 - E=1e-188
CTGTGAAGAGTCCAGCATTGACCCTGAGCACTGTCACTTCGAACACAGGAGACCAGTCCCTCTCTGCACACTCCCTCAGCCCTGTGAGT

TACTCTCCTCACTTTGCTGCTTCCCATTCTTGGCGGTATCTCTGGAGAGACTCCTGGCTCTAGCAGTGGGGCTAGGAATGGCCATGGGG

ACAGGCGTCACAGTTCTCCCTGGGCCTGACGGAGAGGGGTCTGGGTTCTCTGGATTCCTGAAGGG|A|ATATTCTGAAGCATCATTTGC
 >chr7:104474922-10447
TTATTGAAATCACCCATTTATGTCAGTGGGGTCTAGCTAAGCAGAAGAGACCAAGATGGCAAGTTCAGCTGCTGAAGTGTCGCAGTTGC
5253 + E=2e-187
CCTTGTCAAGTGGAGACAAACACATACAAAGGAGGGATGGGAGGTTGATGGAAGGAAGACATACGCCCAAAGCCAGCTCATCAACTTCC

AATTTTCTATTGACTTGTCAATTAAACACATGTGTGCACAATCCATTCAGCATGGCCCATGCAGGTCCTGCAGGCGGAGAGGGCTGCTT

CAGCTTCATGATGGTTTCGGTGGAACATGCCCAAGGGATTCC
