# Supplementary material for: Chromothripsis during telomere crisis is independent of NHEJ, and consistent with a replicative origin
Source: HighWire-hosted journal article supplement (doi:10.1101/gr.240705.118), 2019-03-14
Supplement: Supplemental_file_1.zip [file contig.2.DB79_length_682_mean_cov_7.3431085044.docx]

**DB79_length_682_mean_cov_7.3431085044**

TCTCATTATGTATTATATTATACAGTTTCTAACCTTAAAGATTATTATCCTTCTTTGACAGGTTTGCACAGTGTACTGAATGATTAAGG
 >chr11:37074420-37074774 + E=3e-195
TAGGTGCTTTCTTATTTTCCTGTCAAGAACATTTATATATCTGGCTACAAAAGTGATATAGGATTACTGACAAAGTTAAAACACACAGA

GGGATACAAGACAAAAAACAAAATTGCTTACAACTTTACAAGTCAAAATAACTGTGGCTAACATTTTAGTGCATAACTTTAGTGCATTG

TTTTTAAAATGACTTTTGTTTTCTTCCATGACCTCTGGGAAGGCCGTTAACTATATATATATATATATATATATATATATATATAT|A|
 >
GCAGGATTCTGTATATGCAGTGCCTAGCACATAGCAGCTACGTCATTAATGTTTGCTGAATGGATCAATAAAAAACCTGAGAGGAGGAA
chr11:61357190-61357519 - E=3e-186
GATAAAGATGGATAGTAAACGGGCGATCCTTGCCCAGAAAGAGCTCCCAGTCCATTGCAGGGGTGGAGGAGGTGGACAGAAAGCAGGAT

TGAAGAGCTGTATAAATGCTATCAGCGTAGACAACTCCATCACCGAAATGCTGAGAAGTGCCATGGGGCTACAGAAGAGGAGCATTCAG

ACTCACCTGGGAGAATCAGGGATGGCTCCCTGGACAAAGTGACAGTGAAGATGGGCTTTGA
