# Supplementary material for: Chromothripsis during telomere crisis is independent of NHEJ, and consistent with a replicative origin
Source: HighWire-hosted journal article supplement (doi:10.1101/gr.240705.118), 2019-03-14
Supplement: Supplemental_file_1.zip [file contig.2.DB79_length_683_mean_cov_6.58857979502.docx]

**DB79_length_683_mean_cov_6.58857979502**

AATCCCAGCACTTTGGGAGGCTGAGGCGGGCGGATCAGAGGTCAGGAGTTTGAGACAACCTGGTCAACATGGTGAAATCCCGTCTCTAC
 >chr7:116028401-116028796 + E=6e-223
TAAAAAGACAAAAATTAGCCAGGCGTGGTGGCAGGTGCCTGTAATACCAGCTACTTGGGAGGCTAAGGCAGGAGAATCTCTTGAAATCA

GAAGGTGGAGGTTGCAGTGAGCCAGGAGCACTCCACTGCACTCACTCCAGCCTGGGCAACAAGAGCAAAAGTCTGTCTCAAAAATAAAT

AAATACATAAAAATACTAAAAAAAGAAAAAATCTCAGTAGCAACACAACATTATCCTATTTAAATTTTAATATGTACTTGAACTAATGC

TTTAGCCGAATTTACTTCTATAGCTCAAAAAAATAA|AAA|GTATTGTCCACCAAATTTTTATAAATCTCCAAACACCCACAACACAAT
 >chr7:115668328-115668619 + E=3e-163
TCTACAGATTTCTCTAATTAGCTGGCATTCACAATTCTATATAATAAGGAATATTTGCGTAAATTAGTTTCTTGCTGTTTTTCTTTTCC

TACAAGACTACTGTTAACCTCTCTCTTCGTAGGTTATGACTTTGGGGATGATTGTCATTCCTACTGCTCTATGCCTCCCAGACTCTTCT

TAGTAAACACCCCCAGTAAAATCTGTGCAGGAACCATGCTTTGCACTATGCATGTGTTTTAT
