# Supplementary material for: Chromothripsis during telomere crisis is independent of NHEJ, and consistent with a replicative origin
Source: HighWire-hosted journal article supplement (doi:10.1101/gr.240705.118), 2019-03-14
Supplement: Supplemental_file_1.zip [file contig.2.DB79_length_712_mean_cov_9.27387640449.docx]

**DB79_length_712_mean_cov_9.27387640449**

CATATGTGTGTTTTAACTCTAAATTAGAATATACATTAAAGAAATTACTTATCAATCCATACAAATCATGCAATATATTGCCATGTCAA
 >chr9:118696581-118696906 + E=9e-184 p=0e+00
TGTATTTGGACTTATTAGTCTCCGGAATTGCCTTTTGAGTGGTGTGGTAAACTCACTACTCTCTCTCTCACTCTCACTCATTCTCTCAC

TCATTTTCTCTCTCTCTCTCTCTCTCTCTCTCTCTCCATATATATATATATATTCCCTGCCTGATATTACATAGTACATGGAGGCAGGA

GGCAGGATGAGGAGGGGAATTAGCATGGATTTGAGACACCAGAAGACTGAACTTCAAT|TCTAGATTT|TTTCCCACCTGGTTTGCACA
 >chr9:98169904-9817
ATCTTCAGTTCTGCAGTAATCTTTTCTTTTTTTTCTTTTCTTTTCTTTCTTTCTTTCTTTTTCTTTCTTCCTCTTTTTCTTCCTTCCTT
0282 + E=1e-203
TCTTTCTTTCCTTCTTTCTTTCTCTCTCTCCTTTTCTTTCTTTCTTCTTTCTCTCTCCTCTCTTTCCTCTTTCTTTTTTTTCTCTCTCT

TTCTCTTCTTTTGTTTTTCTTTTGAGATGGAATTTCACTCTTGTGGCCCAGGCTGGAGTGCAATGGCATGATCTTGGCTCACTGCAAAC

TCTGCCTCCCAGGTTCAAGCGATTCTCCTGCCTCAGCCTCCCGAGTAGCTGGGATTACAGGCATGCACCACCATGCCAGGCTAATTTTG

TA
