# Supplementary material for: Chromothripsis during telomere crisis is independent of NHEJ, and consistent with a replicative origin
Source: HighWire-hosted journal article supplement (doi:10.1101/gr.240705.118), 2019-03-14
Supplement: Supplemental_file_1.zip [file contig.2.DB79_length_714_mean_cov_13.4397759104.docx]

**DB79_length_714_mean_cov_13.4397759104**

TACAATTCAGGAGAAGCCATTCAGGAAGAGATGCACAGGGCAAGGTGGGCAGAAGGGAAAGGGGTATAGAGCTTCCACATCATCTCTGG
 >chr9:115761967-115762355 + E=1e-218
GCATGCGACACTTCCAGCACCTTGATGTGTAGACCAATCTAGAAGGTCATCAAAGATCACTGTTTAAGAATTTGTATAGAGCTTAATCT

CCATCCCCATACCTTCCTTCCCAGAGGTTAGTTGGGTGGAGTTGAAAGTTATAACCCTCTAGTTGCTTGGTCTTTTTAGTGATCAGATC

CACTATTGAGGCTATCTAGGGGCCCTACCCTATTTCACCTCATCCACATAAACTCAAGTATGATTTTTTAAAAAGGTGTATTATGAACA

ACAAAAGATATTCCTATCACTCAGGAAAT|CTG|ATTCTTGGGCCCTATCCCAGACTTTTTTATTCAATAGGTCTGGTGTTGGGCCTAG
 >chr9:123403866-123404195 + E=4e-186
GAATTTGCATTTCTAAGCAATTTCCAGGTTAAACTGATATTGCTGGTCTGGGGACCATAATTAGAGAACTACTCTACTAAATTAACTGT

ACTTATTTCACTCTATTTTTTATATCCCTATCCCTGACTGGTAAAGCTACTTACTTTCCACTTCCAGGCATAGTGATGAACCCTGAATT

TGGTATCAATTCTAACCTAAGAAGAGGGTACTTAAGGCAATCAACCTCAGCGGTCTGTCAAGTCCCATTTGCTACTGGTTCCTTTGTCC

TCAG
