# Supplementary material for: Chromothripsis during telomere crisis is independent of NHEJ, and consistent with a replicative origin
Source: HighWire-hosted journal article supplement (doi:10.1101/gr.240705.118), 2019-03-14
Supplement: Supplemental_file_1.zip [file contig.2.DB79_length_727_mean_cov_7.04264099037.docx]

**DB79_length_727_mean_cov_7.04264099037**

GAGCTGAGTGAATGCCTGGGTCTGGTGGCTTTCTCCACCACCACTGCCGAGTCCCGTACGTCCTGTGCAACACAGGGAAGAGGAAGGGT
 >chr9:138300543-138300947 + E=3e-228
GATAGTTCACAGGCACCAGCACTTTTACAGGTGTTCATTCATTACACCATTCTCCATCTGAGGAAACTGGGACCCAGCGAGGTTGAGCA

ACGTAGTCAAAGTCACACAGCTGATAAGTCATAGAACTGATATTCAAGGCCCAGCTCTGCAGCCCCAGACATTGTGCTATGCCACCTAA

ACCAGCCAGAAGAACATCCTGGGAAGGGTGCAAAGGAAGCTGGCGGTGGGCCAGCAGGTGTGAAGGGGCCCAGGGCTGGGAGGAAGATG

AAGACACAAAGTGACCCGAGTGGGGCTGCTGCCCCGGGGCCCTCTGCC|ATTCTTGGAGA|AACGACTGGACTGGTTTTCTCCCCTTTC
 >chr9:114293122-114293434 +
CTAGATCCAGTCTCTCAAGATTCTACTGTTTCCCAAGAGGAGAACTCAAAAGAGGATAAAATGGTCACTGTTTGTCCCAATACTGAGTC
 E=7e-170
CTGTGTAAGTTTCCTTTGATGGTTTTTATTCCTAAGTGAATACTTAATTGAGCTCCTACTGAGTGGTATAAAGATATAAAAATAAAAGG

CTAGGCACGGTGGCTTACACCTGTAATCGCAGCACTTTGGGAGGCTGAGGCAGGAGGATCGCTTGAGCCCAAGAGTTCAGGGTTGCAGT

GAGCTATGATCATGCCA
