# Supplementary material for: Chromothripsis during telomere crisis is independent of NHEJ, and consistent with a replicative origin
Source: HighWire-hosted journal article supplement (doi:10.1101/gr.240705.118), 2019-03-14
Supplement: Supplemental_file_1.zip [file contig.2.DB79_length_751_mean_cov_10.585885486.docx]

**DB79_length_751_mean_cov_10.585885486**

ATGTTTCACCTTGATAAAATAGTCTTAGGGTAAGGAAAAAATAGAATTTCATAGAAGATAGTCTATTTTTTCTTTCCTGAAGAGTTAAC
 >chr10:133118365-133118750 + E=8e-220 p=1e-02
TTAAATAATTCTGTGCATTCAGGGAATTCTGCCTCTTAACCTTTCCTTTGACTCTTCCTGCTCATTAATAAATACATTGAGATATGCTT

GCCTTGGGACCAGTCCCTGGGGCATCTGACTTCTGACCTTTTTCCATGTTCAGAATTAGATGGGGCAAGAGTTTTGATTATCTAAGGAG

CTAAGAGGTAAAATAGAAATACGCCCATGAGACTGTGGGGCCTGAGAGAGAATAGGGTTTCACGGGGGTCTGGGAGGGCAGCGGGGCCA

CCTCAAGCTGAATCACCTGCTCTGTGGCT|CCGGCTTTATTTCACAAGCGGACACAAGTAAGCAACGGGCAAAACCTCCCCCGAGGGAA
 >chr10:133036758-133037124 + E=2e-208
CGGCTCCTGGAAGTTATGTGCTTTCCTATTGGGAACCTTCCTCCATGTTCATTATCTCTGGTGCTTGTTCAAGCTTGCTGCGGTTCTTT

GTGAAATAGGAAGTCGCCCTTCCATGTGCAGCCCTGGCAAAGATTGTTCTGGAAGTGCTGATGGTCTCGGGCTGGAAATGGGACCTGGT

CCTCTTGCCAAATGGTCCAAGCCACTTGCCCATCACGCGGGCAGAGCTGAAGGGGAAGAAGAGGCTGGGCCGCAGCTTTGACTCGGCGC

TCAGGCATTTTCTCTGCCTGGCAGTGCTGGGAAAAGGTAC
