# Supplementary material for: Chromothripsis during telomere crisis is independent of NHEJ, and consistent with a replicative origin
Source: HighWire-hosted journal article supplement (doi:10.1101/gr.240705.118), 2019-03-14
Supplement: Supplemental_file_1.zip [file contig.2.DB79_length_820_mean_cov_3.84146341463.docx]

**DB79_length_820_mean_cov_3.84146341463**

TCTAGGTGGCTCTCATAGGTGGTTGGGCTAGCGAT|GCCCTCCTCTTGCGGATCAGAAGTGCCGGGTGTGGGTCAGTGTTCTCGGTGGA
 >chr9:130321730-130322104 - E=4e-195
GGGTACACGTGCAGGGGTGGGGGCCCAGGGAGTAACTGGGCATCCAGGAGGGGAGGAAGAATGAACTGTGGTTTGCAAAGTGCAGACCC

CACTTTCCCACCTGCCCATCTGTGGCCAAGCCAACTGCAGCTGCTGTCCATCTTTCCCATGCCCCATGCTGAGCAGAACTATTTGTGTC

CAGCCGAATTTGTGAAGCTTAGCACCTTCTAGAAGAGGAGTCCCTTGGGAAGAAGCTGCCCACCCACTCGTGCTCCAGTCACCTCTGAT

TTATTCCACCTGCCAGGAACCACTGGTGGGTGCGGGCTAGGAGGCAGGCTCC|CC|CATCCTAAATTTGCTGGTAGATGACCAAGATTC
 >chr9:97531449-97531862 + E=1e-233
CACCAGTAGAGCTTTATTCAGAGGATAAAACCTTCACACTGCTAAAATGTAGCTACCCAACTGTAGATTGATTTCAGGTTTGCACTGTG

ATGTCAGACATGCATAGGATATCAGCTTGTGAAACAGCAAAAAGCCATTGGTTATAAAGACTCTTAACTCCCTAGCGCTTGGTTTGGGC

ATGTTGGGAAGGGAAGAGTGAGCCTGCAGCTGATGAAGAGAAAAAGGCCAAGAAAAGAATAGGCTGGGAGCACAAAGATAATTTACATT

TTCAAGGTGTGCCTACCCTAAGACCTCCCTCTTATGTGATTGTTTTCCTGCTTTTGAAAGGATTTCAGTAAGAATGTGATTGAGTCTCC

TATCAGACATGGGTATATTAAT
