# Supplementary material for: Chromothripsis during telomere crisis is independent of NHEJ, and consistent with a replicative origin
Source: HighWire-hosted journal article supplement (doi:10.1101/gr.240705.118), 2019-03-14
Supplement: Supplemental_file_1.zip [file contig.2.DB80_length_400_mean_cov_7.86.docx]

**DB80_length_400_mean_cov_7.86**

AGTGGGAAGTGAAAGGGTTGTGGTAAGCATGGGCTGTGCGTGGAGCTGGCGTGCTACCCTCTGCATCATCCATGGAAATGCCCGACTCA
 >chr3:17788692-17788809 + E=6e-59
GATCTCCTGCTGCAAGAACATAGTTGAC|TTACATTTTGTAAGTCCC|ATTTTTGGTATTTTTAGTAGAGACGGGGTTTCACCATGTTG
 >chr3:17790043-17790308 + E=4e-148
GCCAGGATGGTCTCAATCTCTTGACCTCATGATCCACCCACCTCAGCCTTCCAAACTGCTGGGATTACAGGCATGAGCCACCGCACCCG

GCCATACCATTCTGTGTTTCTGGAGCAGATACTTTCAGAGTTATTTGTCTAGCTCATAACAAGAACCATCATCCCAGCACTTTGGGAAG

CCGAGGCGGGCGGCTCACCTGAGGTCCGGAGTTCGAGACCAGCCTG
