# Supplementary material for: Chromothripsis during telomere crisis is independent of NHEJ, and consistent with a replicative origin
Source: HighWire-hosted journal article supplement (doi:10.1101/gr.240705.118), 2019-03-14
Supplement: Supplemental_file_1.zip [file contig.2.DB80_length_444_mean_cov_11.8243243243.docx]

**DB80_length_444_mean_cov_11.8243243243**

TTAAAATCAACTCAATTTACCCTCTTGTTTTAAGAAATTCTTAACAATTGCCTTCCACATTGTCAAAAACAGCTAGGATTTAACTGGAA
 >chr7:110766836-110767136 - E=4e-169 p=3e-02
ACTGTCCATGCTATCACAAAATAAATGTCTAATATTAACAAATAAATTGATATGACTACAGTGCTGGAAATGTTTATAGGCCAGTGAGA

TGTTGATATTATGCAGAAAGCTATTGTAAGAAAAGTTAAAAGTTGCTTATGAGCAGACACAGTAGCAATTAACATGAAAGCTTTGTAAC

TTTGAGAGATAAACAATTTGCCTATAAAAA|CTG|CATAAATGTCTTCTTTTGAGAATTGTCTGTTCATATCCATGTCTAAAACACCAA
 >chr7:110761368-110761515 - E=6e-77
AAGCAATGGCAACAAAAGCCAAAATTGACAAATGGGATCTAATTAAACTAAAGAGCTTCTGCACAGCAAAAGAAACTACCATCAGAGCG

A
