# Supplementary material for: Chromothripsis during telomere crisis is independent of NHEJ, and consistent with a replicative origin
Source: HighWire-hosted journal article supplement (doi:10.1101/gr.240705.118), 2019-03-14
Supplement: Supplemental_file_1.zip [file contig.2.DB80_length_462_mean_cov_9.34848484848.docx]

**DB80_length_462_mean_cov_9.34848484848**

TTCTTTTCACCACGCAAATCATCACAAGCTCTTCCTCATTCCAGGAAAACCTTCATAGTGTTCATTCATGATCAGATCAGAAGTAGTGT
 >chr20:40715184-40715363 + E=4e-96
AAAAAATATAGGGGTTTCGGGAGGCGGAGCTTGCAGTGAGCTGAGATCGCGCCACTGCACTCCAGCCTGGGTGACACAGCGAGACTCCA

T|ATATATA|TGTCTCTGTTAAGCCACTAGATAACTTTAGCTGAGGAGAGAATGTTGAGGTGGGGGGTGGGGTGTGTGGCTGCAGAGAG
 >chr20:40716577-40716853 + E=1e-154
GAGCAAGGCATGCTCCCTCCAGTTCCTGGTTCCCAAGGGGCACAAGATGGATCCTGCCTAGGTCTACAGGTCCCATTGCTGGGGTACAG

AGGGGAGACAAGATTGCGGCTGCAGGCTCGCTGGGGACCACCCCAACATGAACAAAGAAGTCATGTGTTAGACCCTTCATCTGGGGGTT

ACCCTGAAGATATAGCCAA
