# Supplementary material for: Chromothripsis during telomere crisis is independent of NHEJ, and consistent with a replicative origin
Source: HighWire-hosted journal article supplement (doi:10.1101/gr.240705.118), 2019-03-14
Supplement: Supplemental_file_1.zip [file contig.2.DB80_length_517_mean_cov_8.99419729207.docx]

**DB80_length_517_mean_cov_8.99419729207**

AGATTTCAGAAGCACTCAGCAGGACTGAGGATTGTTGATGAATTTCAAGGTTTTGTTGAATACTTTAAATTGCAACTAATTATAAGTCA
 >chr7:112837907-112838167 - E=7e-145 p=7e-03
TTGTTTAGAAATTGTTATACAACACCATTTTTGTAATTGATTTGTATAAACAGATATCGCATTGCATTATGTTTGGTTTTTGTGGTCTG

TAAATTCTTTAATTGCCACTACATTTTTCAAAGATCTCACCTATGACATTAACATCAACTTACCCATACTATGGTTTATAGT|AT|AGA
 >c
CCTATCAATCTTTAAAGTATCTAAAGAAATTTACATTTTTCATACTTTCATCTTTTTTCATAAAAAGTATCTCAAACAAGATTAGATAT
hr7:112837064-112837319 - E=7e-142
AAAGCACAGATAATCCAAAGATAGCCTTGCTATTCTCTTGCTGGGTACAGACAATGATGCCAAGAAATATAGAAGAAATAGAATCTTCC

TGTTGATATATCAACCCAGTTTCAAGTGCATTTTTAAAAAGGAATCACTGCAGAGAGAAATAAATCAATGCTTT
