# Supplementary material for: Chromothripsis during telomere crisis is independent of NHEJ, and consistent with a replicative origin
Source: HighWire-hosted journal article supplement (doi:10.1101/gr.240705.118), 2019-03-14
Supplement: Supplemental_file_1.zip [file contig.2.DB80_length_524_mean_cov_8.87404580153.docx]

**DB80_length_524_mean_cov_8.87404580153**

T|GGTCTATTTAAAAATGTATACAACTAAATGAATCACTACAACACAATGTGTAAAGTGCATCCATTACATATTTACCAAATGTTACGA
 >chr8:133315574-133315781 + E=6e-110 p=1e-02
CATTCACAACTATGGTTGGGTATTATGGAGGCTTCATGGAGAAAGGGAGAGTTTGGCTGAATTTTGAAGGATGAGTAGGAATTTGGCCA

AGAGGCTGAGAAGAAGGATGTCTAGGCAGAG|AG|AATACTGCATATTCTCTCTTGTAAATGGGAAATAAACCTGTATACATGGACACA
 >chr8:133316307-133316621 + E=2e-174
GAGAATGGAATAATAGACAGTGGAGACTCTGAAAGGTGGGAGGGTGGAAGGGAGGTGAAGAATGAGAAATCACCTATTGGGTACGATGT

ACACTATTGGGGTGATGGTTACATAAAAGTCTAGAATTCACCACTATGTAATACATCCATGTAATGAAACTGTACTTGTACCCCCTAAA

TCTACAGAAATGTTTAAAAATGCCATAAAATAAAATGTGGTATAGCCTTAAAAAAATGAAGCTGCACACGTTTGGGGCCAGT
