# Supplementary material for: Chromothripsis during telomere crisis is independent of NHEJ, and consistent with a replicative origin
Source: HighWire-hosted journal article supplement (doi:10.1101/gr.240705.118), 2019-03-14
Supplement: Supplemental_file_1.zip [file contig.2.DB80_length_535_mean_cov_8.97196261682.docx]

**DB80_length_535_mean_cov_8.97196261682**

TGGGCAGAAAAATGAGGGGATAAGAATCCAACCTGAGGGAACAAGACAATTTCTGGGAATTGCCAACAGTTTTTAGAAGAGAGTCATGG
 >chr3:47339477-47339740 + E=1e-146 p=0e+00
TGGGGGATAAAACTGGATGGGGGCCAGGTGCAGCGGCTCACACCTATAATCCCAGCACTTTGGGAGGCTGATGCAGAAGGAAGCCTTAA

ATCCAGGAGTTCAAGACCAGCCTGGACAACAAAGTGAGACCCCATCTCTACCAAAAATAAAAAAATTGGCCAGGTACCTAT|AGTC|TA
 >chr3
GATGTTGCTGTGAAGATATTTTTTAGATGTGATTAACATTTAAATTAGTAGACTTTAGTTGAGTACAGTGGTATGTGCCTGTAATCCCA
:47340704-47340980 + E=2e-154
GCTACCTGGGAAGCTGAGGCGGGAGGATTGCTTGAGCCCAGGAGTCTGAAACCAACTTGGGCAACATAGTGAGACCCCATCTCATTTTA

AAATAATAATAAGTTAGTAGACTTTCAGTAAAGTTGATTACCTTCCATAATGTGGGTGGGCCTCATCCAGTCAGTGTAAGGCCTTAAAG

AGC
