# Supplementary material for: Chromothripsis during telomere crisis is independent of NHEJ, and consistent with a replicative origin
Source: HighWire-hosted journal article supplement (doi:10.1101/gr.240705.118), 2019-03-14
Supplement: Supplemental_file_1.zip [file contig.2.DB80_length_614_mean_cov_10.5016286645.docx]

**DB80_length_614_mean_cov_10.5016286645**

TAGATTCTCACACTCAATTAAAAAAAGAAAGCCTGAGGAAATTAAATGATTTCTAAAATCACCCAGCTAATTAGTGGCAGAAATGAGAC
 >chr14:80201031-80201333 + E=5e-170
CAGATTCCAGTCTCTTGCTTTCCCGAATACCTTATTCTGGAATTCAATTATAAGTACAAGGCATCCCACTCTTGGCTTCCTTTCTGAAT

AAATGCTTGCACCAAATCCCCAGTGGCTTCTTGAGAAAGCTGGCTACAAATCTTCAAAGCCTCAGTTGAAGAATTCTTATTAAGCCTAC

TAGGTACCAAAGCAATAGCCTGAAGTTTGGAAAAA|AATTTGGT|TATATATATATATATATATATAACCTTACTTCTGCTTTTAAACA
 >chr14:80207089-80207393 + E=3e-168
TAGATCATTATTTCCATGTCTACCTTCCACTTTCTCCAACACTAGATTGCAAATTTCTACAGGGTGAAGCTTATGTTTTCATCCCTTAA

CACCCAGCTTAAATGTCACCTCACATACTGACTGATGCTTTTTATCTCAGTTCTAAAACATTATTAATGTACATCACATAATTTAACTC

CATTTTGAAAATTAGTTCTTGTTCCAGTATCTTATCTCTTAAAATAGACTGGAACCATCTCAAGGTTAGAGAGGATCCACTA
