# Supplementary material for: Chromothripsis during telomere crisis is independent of NHEJ, and consistent with a replicative origin
Source: HighWire-hosted journal article supplement (doi:10.1101/gr.240705.118), 2019-03-14
Supplement: Supplemental_file_1.zip [file contig.2.DB80_length_650_mean_cov_11.5107692308.docx]

**DB80_length_650_mean_cov_11.5107692308**

CA|AAATTAGGTAAAGTGTCACCAAGTGAATGTGTGTGTGTTAGTCCAGGTCTTGGAATTGGGTTTACCATAATTGTAGGCCAAGTATT
 >chr18:23003680-23004032 - E=4e-200
CAGGACAATAAACAGCCTCAGGGGCACAGGTCTTGAGAGTTCAAACCTATAAACCTTAAAGAGATGGAAAATATTACTCCTAGGAGGCT

TACTGTGGTTTTTTGTTCCATCAAAGCAAATTACACAGAGACATCATGAATTGATGCAAATTCAGTCCAGTCTCTAGTGCTGCTACTCA

ATAACATGAACTATACTTGCATTTCTCATTTTTCTTTTTTACTTCTGTGATCCTCCTTTTTGTCATTTTGTGGTTTATTTCTACT|TCT
 >c
|CTCATGAACTGCTAGGTAAATTGGGTGAAAGGGCTTCAGTTCCTTGATAAAGTATAGAATAAACATTTCATTGATAGACCAAAGGGTT
hr18:23002504-23002803 - E=4e-168
TAGAAAAACAACTGTAAATTGTCCAATATAGCATCCAAGCAATTTAGCATGGTGTGAAAGTCAAGAATTAGCACCTCCAATAGGTGAAT

TTGAGTTTCATCTTTTCCCCCTGTTTTTGCCCACCCCTGTGGGAGGTGATAATGAATAGTGAAATGGTCAAGTTAGGTCTCAACAGGAG

GGAGAGGGAAGGGTGGCCAATGCCTTCAAA
