# Supplementary material for: Chromothripsis during telomere crisis is independent of NHEJ, and consistent with a replicative origin
Source: HighWire-hosted journal article supplement (doi:10.1101/gr.240705.118), 2019-03-14
Supplement: Supplemental_file_1.zip [file contig.2.DB80_length_652_mean_cov_11.273006135.docx]

**DB80_length_652_mean_cov_11.273006135**

CGCCCGGCCAGACACAGTGTTCTTCATGTGAGGTAGAAATAACACATGCCTTTAAGGACTGCAGAATGATGAGTGGTGATGTTCTTGAA
 >chr3:6926575-6926836 + E=3e-139
CTCTTCCAATACTCCACATATATACATGATTTCTATCCCTGGAAAATTTGCATTAATGAAATAAAGCATTCTTAGTATAATAAGTCTGA

GCAGATGAGAATTTAAGTGAAGGTTCTATACACACCTGATGCACGACAGGCAGACCCCCAAATTGAGGCTTAGCCCGAGAG|GG|CGAG
 >chr3
ATGGTAAATGTGATGTTTAGCACTGTGTTACATATATCATTACTCTGTTAATTCTTGCAGTAATTTAACTGGTCAGTAACAATAATAAT
:6928375-6928769 + E=1e-220
AATAATAATAATAATAAACAGTTTAATAAAATGCTTAGGATGTCCTAAGCACTTTGTATATATAATTCATTTAATCTATACTACACTAT

TTTATATAGATATTATCTTCCAAGTTTTTTTTCAGAGGACATTGAGGATCAGCAAGATTGAGTACTTTGCTTAACCCGTGAACTCAGGT

CAGAATTACTCCAAACATAATTTTTAACTACAAAATGTCTATCATTCTACCTCTGAATTTGTTGTTGTTTTTAACTTCCATACATCTGA

TTTGAAATTCCTTTATATATTTGGGGACCTT
