# Supplementary material for: Chromothripsis during telomere crisis is independent of NHEJ, and consistent with a replicative origin
Source: HighWire-hosted journal article supplement (doi:10.1101/gr.240705.118), 2019-03-14
Supplement: Supplemental_file_1.zip [file contig.2.DB80_length_694_mean_cov_34.6772334294.docx]

**DB80_length_694_mean_cov_34.6772334294**

GGGGGGCGGGGGGGGGGGGGGGGGGGGGGGGGGGGGGGGGGGGGGGGG|GGGGGGGGGGGGG|TGGTGGGGGGGAAACCCACCTAACCG
 >chr2:33141583-33141644 + E=6e-19 p=0e+00 >chrUn_gl000220:134011-134657 - E=0e+0
ACTCACTAAATTAAGGTGAAGGGACGTGGGTAGGGGGGGGAGCCGGGGGGCAACTTGAAAATTAAACTGACCCTTCCCAAAGCCCAAGT
0
AGAAGAGTCTAGGCGCCAAAACACAAAGAAAAGTAAAGCGCCGATCAAAGAACAATAGGGCCCCCGCCAGGGCGGAGGTTCCCTAGGCG

AGGTTCCCTAGGCAACGAGGGAGAGAGGGAGGGGCCTCCAGAAGGGAGAGAGAGAAACCCGTTGCCCCAGGCTCGGTGAAGTCGGCGAG

ACCTCCCTCCGTGTCACGTCGACTTTCAATAACAGTGGCCGCTAGGTGATGCCCGAAGACAACCGATGCCTGCCTGCAAATGTCCGTCA

GCAGGGAAAAGAATTAATGAATTAATTAATTTCCGTATTTATTTAGAGACCGAGTCTCACTCACTCTACAGCCTGGGCCGTAGTGCAGT

GGCGCGATCTCGGCTCCCTGCAGCCTCCGCTTCCCTGGTTCAAGCGATTCTCCCGCCTCAGCCTCCCGAGGAGCTGGCATTACAGGGGC

CTGCCCCACCGCTCCCGACTCAGCTTTGTATTTTTAGTAGAGACGGGGTTTCGCCGTGTTGCGTCCGGCCTTA
