# Supplementary material for: Chromothripsis during telomere crisis is independent of NHEJ, and consistent with a replicative origin
Source: HighWire-hosted journal article supplement (doi:10.1101/gr.240705.118), 2019-03-14
Supplement: Supplemental_file_1.zip [file contig.2.DB80_length_772_mean_cov_9.90932642487.docx]

**DB80_length_772_mean_cov_9.90932642487**

AACAAGCAACTATTGACAGGAAATTGAAAAAATTAAAAATTACCCTTGATGCCGACATGAGCCTCATTAGTGAGATTGAAGAACAATTT
 >chr5:84427663-84428021 - E=1e-203 p=1e-02
TCCAGCTTGATGAGGATGAGAGACAGAGTTTATTGGGTTGAATAATGAATACAAGATTAAAAAATGGAAACAGTAAGTATTGAAGTTTG

CTTTTGATAGGAGAGTACTTGTTACATTTTTAATAAAAGAGAAAATATGCAAAAGCCAATAGCAAATATGCAGATGCAGGGGGAAGAAG

GTTGATTATGTAAGAGAATAAGGATATCTAAAAGGATAAATTTACTAAGAGAGTAGAAGGGATAGACATGAAAACAAACATCAAACATA

A|A|AGCAGGCCCTCACAAGACATCAAATCTACTGGTGGCTTGATCGTGGACTTCCCTGGCTCAAGAACTGTCAGAAATACATTTCTGA
 >chr5:84425492-84425907 - E=8e-235
TCTATATAAGCCAGTCTATGGTAGTTTTAAGACAGAAATATACATGCTCATAATATACACATTGCAGTGAGCATGCGATTTTGTCTCTT

ATTCATTTATTATATGGAAAGTCTAGTATATGAAATAAGCTAATGCTCAGAAAGGTTTTAGTATACTGACTGACACATAATATATTTGT

AATAAATGTGAGCTAGAACAACAATTATGTTAGCTATAGAAGCTTTTCTCAATCAGGCATTCTTTCAACAATTTGTTGCGTTGAAAAGC

AAGATCAGCTTCTAGTTGTATATATTCTTTTTGCACTAAAATTGTTATTGCTGTCTGGACTA
