# Supplementary material for: Chromothripsis during telomere crisis is independent of NHEJ, and consistent with a replicative origin
Source: HighWire-hosted journal article supplement (doi:10.1101/gr.240705.118), 2019-03-14
Supplement: Supplemental_file_1.zip [file contig.2.DB81_length_250_mean_cov_6.6.docx]

**DB81_length_250_mean_cov_6.6**

CAGACATTAGTCTGACCTCCAGGGCCACCTGCACTCCCCAGCCAATCAGCCACTACATGAACAATGCCCTGTAACACCCTAAACTTGGG
 >chr3:51722552-51722716 - E=1e-87
AGAGGAGGCTCAAACCATTTTACAAAGACCCTCCCCCTAAAAACTCCCTGAAATCAGAGACCATGGGGAAGGGCA|GGAAGT|GGCAGG
 >chr3
ATGGACACGGCGGGTAGCCAGCCAGATGGACAGAATGGTGGTGTAGGGGAAGGTGGCTGTCACCACATGGCTGG:51718552-51718632 - E=6e-37
