# Supplementary material for: Chromothripsis during telomere crisis is independent of NHEJ, and consistent with a replicative origin
Source: HighWire-hosted journal article supplement (doi:10.1101/gr.240705.118), 2019-03-14
Supplement: Supplemental_file_1.zip [file contig.2.DB81_length_401_mean_cov_6.89775561097.docx]

**DB81_length_401_mean_cov_6.89775561097**

ACCAAAAAAACAAAAAAAAAGAGTCACTTCAACAGCAGTGAGATCACCTTAAATAAAATGCTGGGCCTGTAGATACCACCTCAGCCAGG
 >chr8:106508597-106508902 - E=4e-168
AGATTAAGTTCAACCTCACCAGAATAAGATCTATGAACATTGTCTGCTTCCTGACATGATGCACTGGGAAAGGCATATTATTTTTGTTT

TATTCTTGCCCCAAACACATAACTTCAATCTAATCATGATAAAATATTAGAAACAAACCCAAATTTAGAGACAGTCTACTAGATATTTG

AGTACCACTCTCCAAAAGTGTCTTGAAAGACAGGGAAGA|CTGAG|TATATATATATACTTTTGGTGGCAGCTTAAATGTGAGCTAAAG
 >chr8:106506333-106506423 - E=1e-42
CTACATATTTGGAAGTCACTGACCTAGTGACACCTCAGATATGGGTG
