# Supplementary material for: Chromothripsis during telomere crisis is independent of NHEJ, and consistent with a replicative origin
Source: HighWire-hosted journal article supplement (doi:10.1101/gr.240705.118), 2019-03-14
Supplement: Supplemental_file_1.zip [file contig.2.DB81_length_482_mean_cov_6.14315352697.docx]

**DB81_length_482_mean_cov_6.14315352697**

TTCTCTATACAACCGTGAGCAAGTTCTTTACTTCTCTGGGTTTCCAAGTCTATATCTGCACAATGAGAGATTTGGGCTACATAGTTTCT
 >chr13:61701708-61702017 - E=1e-166 p=3e-02
AAGGTCTTTTTTAGCCCTAAATTTTTGAAAGTCAAATAATATTCCATAGAAGTTACTTCAGTTATTACTCTTCCAATCACATACTTATA

AATGCCTTAATGGGCTGTGTGTGGAATCTTTAGTGTAGTAGCTTTTTGGTTAAAGATGAGGGTGGAATGAGATAGCTGCCGAGATCATT

ACAGTTTCATGTTACATTTTCCTTGCCCCATATATATATAT|ATA|GCTAAAATTAAAAATGCTGACCATACCAAGTACTGGGGAGGAT
 >chr13:61342911-61343085 - E=4e-93
GTAGAGCAACTTGAACTCCCACACACTGTTGGTTGAAATGTGAAGTGGCAGCACTATTCACAATAGCAAAGACATGGTCAGCATAAATG

CCCATCAATGAGAGACTGGGATAAAGAAAATGTGATATA
