# Supplementary material for: Chromothripsis during telomere crisis is independent of NHEJ, and consistent with a replicative origin
Source: HighWire-hosted journal article supplement (doi:10.1101/gr.240705.118), 2019-03-14
Supplement: Supplemental_file_1.zip [file contig.2.DB81_length_507_mean_cov_12.1360946746.docx]

**DB81_length_507_mean_cov_12.1360946746**

TATTTATATGCAAGTGTTTCTGCTGGATACTAAGAATGATAAAAAAGAAATATGAGAAATGGTGTCTATATCAAGATATATTATAATCT
 >chr11:14777707-14777853 + E=3e-76
AGTTGGGGAGTGTATCAGTCAGGGTCCCAGCAAGAATAATACACTCCAATGGACTAG|AACGGATC|CAGACGGATCACGAGGTCAAGA
 >chr11:14872251-14872
GATCGAGACCATCCCGGCTAACACAGCGAAACCCCGTCTCTACTAAAAAAAAAAATAGCTGGGTGTGGTAGTCCCAGCTACTCCAAAGA
616 - E=4e-187
CTGAGGCAGGATAATGGCATGAACCTGGGGGGCGGAGCTTGCAGTAAGCCGAGAATGCCCCACTGCACTCCAGCCTGGGTGACAGAGCA

GGACTCCGTCTCAAAAAACAAAACAAAGCAAAACACAACACATATTTAGTTCCAAGTCCTAATGTTTAAAGCTATTGCAATTACAGTAT

CTATTTGTTGAGAACTCTTGCCTCTTTCATGCAAATTGTGACCTTAAAGGAATTTTATATTTTA
