# Supplementary material for: Chromothripsis during telomere crisis is independent of NHEJ, and consistent with a replicative origin
Source: HighWire-hosted journal article supplement (doi:10.1101/gr.240705.118), 2019-03-14
Supplement: Supplemental_file_1.zip [file contig.2.DB81_length_613_mean_cov_9.99673735726.docx]

**DB81_length_613_mean_cov_9.99673735726**

AAGCATCATTAGAGTGGCTGAAAACATTTCTTAGGCATAAAACAAACAAAAAACTCGCAAATAACAAGGGCCTGAAAACAGTATAAGCA
 >chr2:189160897-189161162 - E=1e-144
TTGTTTTCTAAGTCTTACTCTGGAACAATGACTTTTAGCCATTCTCTTTAAAAATAAAGGCCTGATTTCAATTTCATATCCCCAGTGTT

TGAAAGTGAAGCGATTTCTCCATTCAAAGTTATACCATTTTTTCCTCTTCCAATCTGAGTATATTTTATGCTCTTATGGGAAAAAGC|A

TTTCCCATAAGAAAAAGCA|TTTCCACTTCCTCACATTCACTCTGTCTAATAATCTCCCTTACTTTAGCACCTAATCACCCATTTTGTA
 >chr2:189157936-189158264 - E=1e-185
ATACAGACACAAAATCATCAGTATTGTCTCCTGCTAGTCCTAGAAATCAGTCATGACTTGAACATTCTCCGTAACTTTTTATTCTCAAA

TGTTGGTGTAACGTATTTTAAAAGCAGGCACAAAATAAATTTATTAAATCCTTCCTAATTGACTGCATTACACTTTGTCAAACTTGCAG

ATTGAAATAGTGCATGTAAAATGTCTGATTGCAAATGAGTAAGGCGAGCTCAGTTGGGAAACACTACTAGGACCTAGGGAG
