# Supplementary material for: Chromothripsis during telomere crisis is independent of NHEJ, and consistent with a replicative origin
Source: HighWire-hosted journal article supplement (doi:10.1101/gr.240705.118), 2019-03-14
Supplement: Supplemental_file_1.zip [file contig.2.DB81_length_629_mean_cov_6.91573926868.docx]

**DB81_length_629_mean_cov_6.91573926868**

TTGTTGATGCACATTTGGATCATTTCATTTTTTTTCTTGGGTTAATACTTAGGAGTTGGATAGTTGTATCATAGAGTAGGTATATGTTT
 >chr13:61342126-61342423 + E=4e-159 p=2e-02
ACATTTAAAGAAACTGCCAAAATATTTTCCAAAGTGGTTATGCCACTTCACTTTTTTTTTCAAGTTGAGAAAAATTTACTCATGTGTTA

GCAAAGGATGCATAATATGAAATTAGAGCCTATTAATCTTTATTTTTTTAACTTTTAAGTTAAAGGTACAAGTTCAGGTTTGTTACATA

GGTAAACTTATGCCATGGGGGTTTGTT|GT|CAGCATTTTTAATTTTAGCTATTCTAATAGGCACAACGTAGTGTCTTGTTGTGATTTT
 >chr13:61343061-61343396 + E=7e-187
AATCTGCATTTTACTAATGACTAATTATGCTGTTTTTGTCAAGTTTGTCGAAGATCAGATAATTGTAGATGTGTGGTATTATTTCTGAG

GGCTCTGTTCTGTTCCATTGGTCTATATCTCTGTTTTGGTACCAGTACCATGCTATTTTGGTTACTGTAGCCTTGTAGTATAGTTTGAA

GTCAGGTAGTGTGATGCCTCCAGCTTTGTTCTTTTGGCTTAGGATTATCATGGCAACGCGGGCTTTTTTTGGTTCCATATGAACATTAA

AGTGTTTT
