# Supplementary material for: Chromothripsis during telomere crisis is independent of NHEJ, and consistent with a replicative origin
Source: HighWire-hosted journal article supplement (doi:10.1101/gr.240705.118), 2019-03-14
Supplement: Supplemental_file_1.zip [file contig.2.DB81_length_633_mean_cov_12.5718799368.docx]

**DB81_length_633_mean_cov_12.5718799368**

AATGGAAACGTTCCTTGCTAATTCAACCGTGGAAAGAAAACTTGGCAATTGAGTTTTGGAAAGCAGAGGCTCTTTTATCTACCTGATCA
 >chr1:103660817-103661095 + E=1e-152
ATATAGTATCATCAGTTGACAGATTTATTCCCACATGGTTATTAACTTACTCAAGCAAATGAAAATTTCATGAATATCTAGCAGTCATG

GCAAGATGTTAACAGAGTTTGACAAAGAGATTTAAAATGTATTATGTACAAGTTTCTTATTTCTTATTACAAACTTTTTTTGCTTTACT

GACATGAAC|TG|GCAGATACCTTAAAAAGTAGAAAATAGGAATACTTCTCTTCATTGCCAAAATACATTACTGAATTCTTTTAGTGAT
 >chr1:103659218-103659575 + E=4e-203
GATAGAGTTGTAGGTAGTGCTATAGAAAGTAGAATACGATTGTTATTTTTAATTGCAATAACTCTATAGAACTGTAGAGATTGCTATAA

AATTTACTTTTGTTCTTTAAGCTTTTAGGAAGTACTGAGCAATGAATGTTAGATATCATGAAATAGTGTTGATTTCATAGGCATTTAAA

TATGTACTCTCCTGTATACCTTAGTATTTCACATTTACCAACCTATAATTTTTGGCCAAAGTATACATATTTTCAAATTACAGCTTATA

AAATAACACTTC
