# Supplementary material for: Chromothripsis during telomere crisis is independent of NHEJ, and consistent with a replicative origin
Source: HighWire-hosted journal article supplement (doi:10.1101/gr.240705.118), 2019-03-14
Supplement: Supplemental_file_1.zip [file contig.2.DB81_length_646_mean_cov_6.96594427245.docx]

**DB81_length_646_mean_cov_6.96594427245**

AAGGGAGGGGCAGGCTGCTCG|AGCTTCGTGTTTAATTGCTTCAAGGGGAGGGGCCCTGGGGAAACAATTTTCTGGGAATTTACAAAGA
 >chr3:51703182-51703549 + E=5e-188
AGGATGGAGAAAGGATCTCTGGAGTGAGTCCTTGGACAGAGGAAGGCAAGAGGAGATGAAGGCCAAGTCTGGACTCATGATAGGGGAAT

CTGTGCTATTGGGAGATAAGATTGGGAGTGGAGGATGGTTGCAGCACATGGCTGGGCGAACAGGTTTCCTCAGACCTGTTACAAGGGGT

TGGAATGAAGAAAGTGCCTTGTAGAGTAGGCTGCTGCCTCCTGGTGGCCAGCCGCTGCCTTGCAGGGATCCTGCCAAGGGACCTCACTT

GGCACTGTTGGAAGCAGCCTGAGGTGAAGCTGG|AAGGGCACTTTTGAAAAATGAA|TGTGGTCATTTGGCTGGCATGACCACAGCCTC
 >chr3:51712718-51712954 + E=3e-
ACAGAGGCTGGTGAGAGTTCTGATGTAGGCCTGTGTCACACTCCCTCCTCCCTCAGTGTGTGTGGAGAGAAGGCTCCCTGCCCTCCCTG
130
GAGGCACTTAGTTTGGGTGGAGCCTGGGAAGGGGTGAGGGAGTAGGATTTCCCAGGACTGACCTCCTCAACAAAGGCAATGGGAATGTG

GGCTGGGATGTTTCCTGAGGGCTCAG
