# Supplementary material for: Chromothripsis during telomere crisis is independent of NHEJ, and consistent with a replicative origin
Source: HighWire-hosted journal article supplement (doi:10.1101/gr.240705.118), 2019-03-14
Supplement: Supplemental_file_1.zip [file contig.2.DB81_length_656_mean_cov_13.0365853659.docx]

**DB81_length_656_mean_cov_13.0365853659**

AATATATAATTTGCAATGTTCATGGCAAGACATTTTAACCATACAAGAGAAAAAAAGGTCAAAAATTCCCTTTTCTCACCCCTTCTACT
 >chr7:18596965-18597291 - E=2e-184
ACTACTACTAGTAGAAATCCCTAGTAACAGATTCTGTGTATTCTCCATAAAGTCTATCTTTCATGAAATATTATGTTTATATCTCTATA

TATTATAGATGAAACAGATAACATAACTAAAATAAAGAACACACATAACAATCCCATTTTTATTTACATTTGTAATAAAGAAAACTTAG

GGAGAGGTGACTTTAAAGTATACCAGGAGGATTAAGGTTAGATATAAAAAAAAAAAAAA|CT|CACACCCATATAAGACGGCGAACTTA
 >chr7:18587543-18587871 -
ATCTGTAAATGTTGTGTGTGGTGTTCCGACTTCACTGACCAGCAGTCAGTCTCTGACTCTCTGCCTCTCCTCAGGTCTCCCTATTCACA
 E=1e-185
GAGACACAAGAATATTGAAATTAGGGCAATTAATAACCCTACAATGGCCTCTAAGTGTTCAAGTGAAAGAGAAAGAGTTGCACATCTCT

CTTTCAATCAAGAGCTAGAAATGATTAAGCTGAGTTAGGAAGGCATGTTGACAGCCAAGACAGGTGGAGAGCAAGGCCTCTTGAACCAA

ACCACAAAATTGTGAATGCAAATGGAGGGAGGGAG
