# Supplementary material for: Chromothripsis during telomere crisis is independent of NHEJ, and consistent with a replicative origin
Source: HighWire-hosted journal article supplement (doi:10.1101/gr.240705.118), 2019-03-14
Supplement: Supplemental_file_1.zip [file contig.2.DB81_length_701_mean_cov_7.7032810271.docx]

**DB81_length_701_mean_cov_7.7032810271**

AGACTTTGGGTCACATGCACACTCATGAACAAATCACTGTGGACAGGCGGCAGGTAGAGTGTGGTGATTGGATTATCTTAGATTACATG
 >chr6:14312446-14312759 + E=1e-176 p=3e-03
CTTCACTCTCAAGCCTGGGGGATGGAGTTGGCTGAATGAAAACAATATAGACTAAGAGTTGGTGGATATACGCCCAATAATATTAGGGC

ACTGCTGCCTCTAGATGGGAGAGTGGAGAGTGAGTGGTATAAACAACAAATATCCGCTAAACTACCGCAGAAAAAGGAGCAATAATTGA

AAAAAGTAAAGCACTTTGAATCTCTTGAATTAAAAAGCAATAT|GAA|ATAACTGGCATCCCAAACCCTGAATTCAGTCCTGCCAGCTC
 >chr6:14314594-14314985 + E=2e-223
TAGGTGACTACCTTGGCCTGCTTGGACTGCTATAATGGATACCATAGACTGGGTGGCTTAAACAATAAACATATATTTCACACAGTTCT

AGAGGCTGGGAAGTCCAAGATCTAGGTGCTGACAGATCTGGTGTCTGGTGAGGGCTCCTCAGTTCCCATTTGCAAACATTTGGTCCATA

TGGACAAACACTTAGTCCATAACAGTTACTAAGAGAACTGACATTTCCTGAGGACCTATTAGTTGCCGCACAAGTTATTTATGTCATCT

CATTTAATCATCACAGCAGGCCTAATGAAGTGGGAACTGTTTTTCCAATTTTATACATGAGGAAACTGAGGAACGACTAG
