# Supplementary material for: Chromothripsis during telomere crisis is independent of NHEJ, and consistent with a replicative origin
Source: HighWire-hosted journal article supplement (doi:10.1101/gr.240705.118), 2019-03-14
Supplement: Supplemental_file_1.zip [file contig.2.DB82_length_243_mean_cov_3.7037037037.docx]

**DB82_length_243_mean_cov_3.7037037037**

AGGATTCATGGACAAGAATGGGTGATAAATGTCCCAGATACCTTGCCCTTTCACTGAGATGACT|C|AGTGTAAGGAAGGGGGGCTTCA
 >chr5:174736253-174736318 + E=7e-25 >chr5:174748907-174749
AACAGGAGGCACAGACTCCTTAGAGATGCCTCTTGCTGCCAATCACCTCTCCTCTACCCTTGACCAGGAAACCTCTTCAGAAACTCACA
086 + E=8e-94
GAATGACAGGCGGTCAGCATACACCTTCTCTATGTGCAGAGAAGGGGACAGGTCCCACTGTGGCATT
