# Supplementary material for: Chromothripsis during telomere crisis is independent of NHEJ, and consistent with a replicative origin
Source: HighWire-hosted journal article supplement (doi:10.1101/gr.240705.118), 2019-03-14
Supplement: Supplemental_file_1.zip [file contig.2.DB82_length_350_mean_cov_8.08571428571.docx]

**DB82_length_350_mean_cov_8.08571428571**

CTCACTCTGTCGCCCAGGCTGGAGTGCAGTGGTGCAATGAAGGCTCACTGTAACCTCTGCTTCCTGGGTTCAAATGATTCTCCTGCGCC
 >chr22:38892380-38892504 + E=3e-60
TCAGCCTCCTGAGTAGCTGGGACTAGAGGCAGGCA|TGCCTCTAGT|GTGTGGCGGCGCATGCCTGTAATCCCAGCTGCTTGGGAAGCT
 >chr22:38893159-38893380 + E=5e-109
GAGACAGGAGAATCGCTTGAAGCCAGGAGGTGGAGGTTGCAATGAGCCGAGATTGTGCCAATGTACTCCAGCGTGGGCAACCAAGAGCG

AAACTCCATCTCAAAAAAAAAAAAAAAAAAAAGTACACATTCAATGCCAGGCGCGGTGGCTCACACCTGTAATCCCAGCACCTTG
