# Supplementary material for: Chromothripsis during telomere crisis is independent of NHEJ, and consistent with a replicative origin
Source: HighWire-hosted journal article supplement (doi:10.1101/gr.240705.118), 2019-03-14
Supplement: Supplemental_file_1.zip [file contig.2.DB82_length_377_mean_cov_7.68169761273.docx]

**DB82_length_377_mean_cov_7.68169761273**

TTTCTTTTTCCTTCTTTCTTTCTTTTTCTTTCTTTCTTTTTCCTTCTTTCTTTCTTTTTCTTTTTCTTTCTTCTTTCTGTCTTTCTTTC
 >chr11:39199151-39199424 - E=5e-150
CTTTCTCTCCCTCTCTCCCTCTCTTCCTCTTCCCCTTCCCTTTCCCTTTCTTTCCTGATTAAACATAAGACATTTATTTCTCACAGTTC

TGGAAGCTGGGAAGTCCAAAATCAAGGTGCAGGTAGATCTGTTGTCTGGTGAGGGCATTCTTTTTGGCTTGAAGATAGATGTCTTTTTG

TTGG|AT|ATATATATATATATACACCTGAAGGATTATAAATCATTCTACCATAAAGACACATACACATGTGTGTTTATTGTAGCACTA
 >chr11:39173339-39173445 - E=2e-52
TTCACAATAGCAAAGACTTGGAA
