# Supplementary material for: Chromothripsis during telomere crisis is independent of NHEJ, and consistent with a replicative origin
Source: HighWire-hosted journal article supplement (doi:10.1101/gr.240705.118), 2019-03-14
Supplement: Supplemental_file_1.zip [file contig.2.DB82_length_406_mean_cov_6.28078817734.docx]

**DB82_length_406_mean_cov_6.28078817734**

GTAGAATTTTGATTTATGAAATAGTACAACAGAGCAAAAGGTATTACTCACATCTGTACTAGATGAGATATTTATAACACAACTGCTAT
 >chr6:19525211-19525487 + E=9e-155
CAGCTCCCAAATTTCAAAACCTTTTAAACCACTTTAGCTTAGAGTACATTTCAAACACATTTTCAACTAGAGATCAACATTCAAAAGTA

CTTTAAAAAATACAAGTTAGAGAAAATATTCAAACTCTTTAGTATAAATATAGCATCTTAGTATCTCTAATAATAATTGGTAGTGTGAG

ATTTTCTCA|C|AGCAGTTCTAACTGGTTCCAAAGATGATCTAGTTCAGAGTTGGCTATCTAACTAAGACGATATGCCAAATCCTAATG
 >chr6:19526053-19526182 + E=4e-66
TTTTCACTCCTTGCTTGAGGAGAGTGTTGTCACTGTGGTTTAAGGAAGATTT
