# Supplementary material for: Chromothripsis during telomere crisis is independent of NHEJ, and consistent with a replicative origin
Source: HighWire-hosted journal article supplement (doi:10.1101/gr.240705.118), 2019-03-14
Supplement: Supplemental_file_1.zip [file contig.2.DB82_length_418_mean_cov_7.89473684211.docx]

**DB82_length_418_mean_cov_7.89473684211**

AAGAGAAAGGGTAAGGTGAGTTCCGGTTTATGATTTGACTTGAGGCATTCGGAGGCTAAACATCCACAAGGTTAGTTCCCTGAACCCCT
 >chr20:8286291-8286558 + E=3e-149
ATAAACCTTGCTATTTATATCTCTTCCTCAACTCTGAGGCCCTCACCCTACATCGGCTGCAGTACAGATTCAGCCTTTAGCGACGGAAT

TATGTACTGAAACACTCATTTCTGTGCCGCTGCAGTGGTTAGCTTTGATTTTTATAGAGATGCACATGAGAAAACAGTCTGAGC|CTGG
 >ch
A|TTCAGCTTTAACTGGTTCTAAAATAATGAAGCAGAAATGACTTTCCTTCTCTCTCTGGTGTCAGCTTCAAATGAATTATGGATACTG
r20:8287918-8288074 + E=2e-82
AACCTACAGAGGTAATGCTGATTAAATAATTGAACAATCCATTGATTAACTACAGATTGTCAAT
