# Supplementary material for: Chromothripsis during telomere crisis is independent of NHEJ, and consistent with a replicative origin
Source: HighWire-hosted journal article supplement (doi:10.1101/gr.240705.118), 2019-03-14
Supplement: Supplemental_file_1.zip [file contig.2.DB82_length_510_mean_cov_5.57843137255.docx]

**DB82_length_510_mean_cov_5.57843137255**

AATGAGACAGAGAGGAGGAGGTACAAGGCAGGAGCCACGGCAGAGAGAGGCATGTGGAGTGAGCTTGCATCCAGTGCAGAGGCGTGGGA
 >chr10:43484427-43484783 - E=9e-203 p=2e-02
GGGTGCAGGGCAGACGACATGATCAGCGGGGGCGGACGCCACCACAGCCACTTCCCAGTGTGTTGGAGGCTCTGTTCCTGTTAGGCACT

GTGCATTTCTGAGGGGCTGGCCTGTGACGTGGGGTCTGTGGTTTGGACTCTCTGACCCTGTTCTGCTGCTATGCATAAAGTCAGGGCTG

TAGGGGCCTTAGAGGCCAAGGCCAGAGCTCATTTCACAAAGGCAGCCATGGTGGCCAGAGAGGAAGGGGGTTCTGGACCCCCTAGATGC

|CTCGGCATCAGAGGGAGAGGGAGAGGGAGAGGGAGAGGGAGGGGGAGGGAGAGGGAGAGGGAGAGGGAGAGGGAGAGGGAGAGGGAGA
 >chr3:186581280-186581379 - E=6e-36
GGGAGAGGG|GGCGGGCGCGTCTGTTTCGTCTAGGAGATGCTGGGTGTTTCCGTTTCTGTTTGTTTC
