# Supplementary material for: Chromothripsis during telomere crisis is independent of NHEJ, and consistent with a replicative origin
Source: HighWire-hosted journal article supplement (doi:10.1101/gr.240705.118), 2019-03-14
Supplement: Supplemental_file_1.zip [file contig.2.DB82_length_520_mean_cov_6.05769230769.docx]

**DB82_length_520_mean_cov_6.05769230769**

AAGCTTCTATCCTTTTATTCTCTTATTACACTCTGGCACACTGGTCTTCTTTCAGTTTTTCAGGCACATCAAACTCCTCCCAAGCTTGG
 >chr20:40906794-40907080 - E=1e-160 p=1e-02
GGCCTTCGCTCATCTTGCCCTCTCTCTGAAATGCTTTGGCTACTATATATGTCTCCTTAATAGATAAATATCTTAACAGAGAAGTATCT

TTAAGATGGCCTCTTAAACCTTATGTCCTCAGAAGACCATCCTGACCTCTGTTTTAATGTATATCCCTAATTTTCCACTCTCACTAAAC

CCTGTACTTTTCCTTCATA|T|AATCTTAGAAACATTATATGTGAGGCACCCAGAAAAGTACCTGGCATGTCGTGGGTGCTTGATAAGT
 >chr20:40899131-40899364 - E=1e-128
GGTGCCTCTTACTCTTGTTTCATTTTTTTTAAATCTATTTCAGGCCCTGTTTTGTTAAATCATGATGTTCTTTTGCTATTTAGTGTGAG

CTCTTCAGAGCCACAAGAATTGCAGTTTTGTTCACCGTGCTGCACGTTTTCATGTGTGTTTCTTTCTCTCCTTCTCT
