# Supplementary material for: Chromothripsis during telomere crisis is independent of NHEJ, and consistent with a replicative origin
Source: HighWire-hosted journal article supplement (doi:10.1101/gr.240705.118), 2019-03-14
Supplement: Supplemental_file_1.zip [file contig.2.DB82_length_650_mean_cov_11.7723076923.docx]

**DB82_length_650_mean_cov_11.7723076923**

TCTGAAACTTACTCTCTCTTTCCTGATCAATATATGCCATCATTTGGTGAACATACAGAAATTTATTTACCATAGACAACATAATATAC
 >chr4:19976062-19976432 - E=6e-211
TTTAAAAGTATATTAGTTAGAGATAGCCAAAATATTCAGGAAGTTATTACTCATTTATTTTTAATTTTTCCTAGTATTAAGTTAGGCCA

TGTGAAATCGCAATTTTTGTAGATACAAAAAAAGATGAATAAAGGCAATTTCATATTGCCCAGCTATTTAAATGAGCCTCTTTCTCTCA

AGTTTTCTGTCATTTTGAAAAAAAATTGTTTGAGACAAAAAATGTTTTGTTCAATTTTCAGCCATAACAACCTTGCCTAGGTTACTGTT

TTGTACTCTCCCTA|GAGAAAGTCC|TAGAGAGGACTTTCATGTCTAGAAAAAAATCTGTATAGTAAAGGAATATGTAGCTCTGTGTAT
 >chr4:19974640-19974910 - E=1e-144
ATCTCCTTAGTAGTTCTTAGCACAGTTGCAGTTTTACACATTTGTGTAGTTAATTGATTGATATCTGCCTTTCCAATCAAGTATTGAAA

TATTATGAATTTAGTGGTCTAGCTACTTCACTACCTGGAATAGTGCGTGGAACATCATACAGATTCAATGACATTTGTTGACTGAGTAA

ATAAATATAAAGATACTAGAAGGAGGTGT
