# Supplementary material for: Chromothripsis during telomere crisis is independent of NHEJ, and consistent with a replicative origin
Source: HighWire-hosted journal article supplement (doi:10.1101/gr.240705.118), 2019-03-14
Supplement: Supplemental_file_1.zip [file contig.2.DB82_length_698_mean_cov_6.12607449857.docx]

**DB82_length_698_mean_cov_6.12607449857**

GACTTGGTCTGTTTGAGGTTTACTATTCAATGGAAGCATATCTAAGTCACTTAGCATCAGCTCACTCTACATGCCCTCAACTATTGAAA
 >chr5:13310250-13310614 - E=3e-207 p=3e-03
GGCACCTTCATCTTCACATTTTTCAAGTAGGAGGGAAAGAGGATGTGAACAGCCCTCACAATGAAGAGGCGAAAACTTGTCTGAAAGGT

AGAAAGCTGGCATTGCCAACTGGTTAATTGAAGCTTGAATGCCAAGTTTCAAGTTCTTGAAGGTTAAGAAAGCCTTTCTTATTGGTTAA

TAGGGAGATAAGTGAGGATCATCCTCGAGGCATCTCAAAATCTGTGCTCATCGGCCATGTCCTCCTGAACTTTTGCCTCTGAGGGAACA

CAAATAGT|ATATATACTA|GGGTATCCTACAGAAGCCAGGGCTCTTTGTCATAAAGCTAAACACACACACACATGGTCTCAAAGTTGG
 >chr5:13308024-13308348 - E=4e-180
AGAAGCCAAAGTAGAATCCAGGGAAAGAAGAAGCAGTGGCAGCCTTGGTTGTTTTTCATACCAGTGATGTGAAACAACAGATCGGCAAC

ATTCTGTGTGAGCCAAAAAGTCTGGTGCTTCGTGTCCACCCTCCAAATCTTGCATAGAAATATCTTTTGTGGCTCACTTTAACAGAAAC

ATATGGTATCCATCAGAGGACAATCAAATATAGTCAATGTCAAAACTTTTGCCTCAGATCATCCCGAGGCTTTGAGT
