# Supplementary material for: Chromothripsis during telomere crisis is independent of NHEJ, and consistent with a replicative origin
Source: HighWire-hosted journal article supplement (doi:10.1101/gr.240705.118), 2019-03-14
Supplement: Supplemental_file_1.zip [file contig.2.DB82_length_735_mean_cov_10.7591836735.docx]

**DB82_length_735_mean_cov_10.7591836735**

TGATTCATGTTAAGAAGGAAAAATATACCTGATCTAAAAAATGTCTTCATTGAATTCAAGCAAATATTTTCTTGTTGATTTGTATTTAG
 >chr11:90495323-90495675 - E=6e-200
TTTACTAAGCCTATAATGACTAATTTAATGGCGCCTAAAATTGCAGTTTATTCTAACAACAGTAAATAGTCAAATAATTGTTTTTTTTT

CCTGGTTAATTAAATTGTAAAGTGCCTTTCTTATATAGCCTTCTTTTGCTTCTCCTTTACTAGTTGCAATCAACAGCATATGCAGATAA

CAATAACTAACCTGTACAATCCAGAGGCTGCTACTATGAACATTATGGACAAGTTTATCACTACTTATATGCATGGGAATA|GGCA|CT
 >chr1
GATCAGATTTAGAAATATAACATGTAAACAACCAAACTTTTAGATTAATGCATGTTCTAAATAATACTTTGTGTCTTAATGAGTGTTCA
1:90494342-90494729 - E=5e-218
AATTCTAAATTGATCCTGAGTCTTACACATAAGCAAGATGAAGGGCTAATCAGTCACTACCACCCACCAAGTAGTTCATTCTGAGCTTT

CCTCTTGGGTATACAATTCTGCCTTAATGTGCTATGTTAATTCATGTAATCATGCCTTTGTTCAACCTTCCACCAAGTCTTCATTGCAT

CCTTTCTCTGAACATGCTTCAGTATTCAGTTTGACAACTGAAAGATAAATTTTTGAAAGACATTTATTTTAACAAATTTCTTAACAAAA

CTCTGATTCAGGATACAAATGGAAT
