# Supplementary material for: Chromothripsis during telomere crisis is independent of NHEJ, and consistent with a replicative origin
Source: HighWire-hosted journal article supplement (doi:10.1101/gr.240705.118), 2019-03-14
Supplement: Supplemental_file_1.zip [file contig.2.DB83_length_474_mean_cov_8.71097046414.docx]

**DB83_length_474_mean_cov_8.71097046414**

GGGCTATGTCTAACTGGCAAGATGAAGCTTCCCTGAGAAGATTGTGTCTGAATCTCACAGAAAAGAAATACGAATAAGGCAGTTTAGCA
 >chr17:16311573-16311813 - E=7e-124
GGCAGCACAGGCTTCCTGGAGCAAGGAAGACTGAGGCAGCGGAGAAAAAAAAATGCTAGCTGGTCCTCAAACAGGGCCAGAGAGGACCA

AAGGGGACCAGACACCTCCTGGAGGGCAAGGGGACCAGCTGGCTGGGCACAGCC|TGCCCA|CCACCACACCTGGCTAGTTTTTGAATT
 >chr17:16309772-16309982 - E=8e-
TTTAGTAGAGACCAGATTCCACCATGTTGGCCAGGCTAATCTCGAACTCCTGACCTCAGTGATCTGCCGGCCTTGGCCTCTCAAAATGT
115
TGAGATTACAGGCGTGAGCCACCTCTGCAGGCCAACACTCTTTCTTTCTTTCTTTCTTTCTTTCTTTCTTTCTTTCTTTCTTTCTTTC|

TTTCCTTTTCTTTCTTTCCTTCTTTCTTTTTT
