# Supplementary material for: Chromothripsis during telomere crisis is independent of NHEJ, and consistent with a replicative origin
Source: HighWire-hosted journal article supplement (doi:10.1101/gr.240705.118), 2019-03-14
Supplement: Supplemental_file_1.zip [file contig.2.DB83_length_482_mean_cov_4.3153526971.docx]

**DB83_length_482_mean_cov_4.3153526971**

CTCCCCTCC|CCCCCCAACCCGCCTCCCACCCCATATCCGCCCCCCCCCCCCCTCACCCCCACCTCCCTCCCACCCCCCCTCTGCCTCC
 >chr17:16310844-16311259 - E=2e-220 p=0e+00
TCCACCCCTCACCCCACTACCCCTCACCCCCACCTCCCTCCCACCCTCACCTCTGCCTCCTCCACCCCTCATCCCCCGACCCCTCACCC

TCATCTGCCTCACCCCTCCTCCGGCTCCTCCACCCCTCACCCCCCCACCCCTCACCCCCATCTCCCTCCCACCCTTGCCTCTGCCTCCC

CTACCCCTCACTTCGCTACTTTCTTCTCATCCCACCTCAGCCACGCCTCCCACCCTCGCCTCTCCACGCCCTTCCATCCCACTTCAGCC

GCGCCTCCCACCCCTCACACCCCGACCTGCCTCAGCCGCGCCCCCTACCCCGTCCCTCGGGTAGTAGGC|CCCCCCCCGGTTCCGCCCA

GCCCCCCCCCCCCCCCCCCCTCCCCCCCCCC|CCCCCCCC >chr11:61158724-61158755 - E=5e-04
