# Supplementary material for: Chromothripsis during telomere crisis is independent of NHEJ, and consistent with a replicative origin
Source: HighWire-hosted journal article supplement (doi:10.1101/gr.240705.118), 2019-03-14
Supplement: Supplemental_file_1.zip [file contig.2.DB83_length_536_mean_cov_5.03731343284.docx]

**DB83_length_536_mean_cov_5.03731343284**

GCACACACCTGAGGTGGGAGGATCGCTGAAGCCCAGGAGTTAGAGGCTACAGTGAATTATGATCGCACCACGGCACTCCAGCCTGCGTG
 >chr17:29884783-29885039 - E=2e-142
ACAGAGGGAGACCCTGTCTCTAAACTTCACTTTGGTAAGGGTTGAGTGGTATATCTGGTTTATCTGATCCCCACATCGGGATCCCTGGG

TAGGACATGTCCAGGAGCTGGTGCTCCCAGGAGTGCGTAGCTGGGGGAGGGATGGCGGCCAAGCGCTGGCAGAGAT|GC|TTCATGGTA
 >chr17:299
ACCTTGGGAACGAACAGGCTATAATCATGGTGAAAGTGAGCAGTCTTCCAGCTACTGAAGGGGTTACAACAGGGAATGGCACTCTATCA
49340-29949616 - E=2e-154
AAGCCCCATTCCCAGAAAATTGTCCTACTTGAACTGTCTCTCAGTGCCCTGGAAAACCCCACTTGCAAGGCTCTCTTTATTTGACCTGA

TGTAGAACTTGCTCAGTACAAAAAGCCTTTTTCCTGAGGGCATTTGTCAAAAATAATCAGTAGCTATTGTTTATTATTATTATTATT|T

TGAGA
