# Supplementary material for: Chromothripsis during telomere crisis is independent of NHEJ, and consistent with a replicative origin
Source: HighWire-hosted journal article supplement (doi:10.1101/gr.240705.118), 2019-03-14
Supplement: Supplemental_file_1.zip [file contig.2.DB83_length_579_mean_cov_10.4248704663.docx]

**DB83_length_579_mean_cov_10.4248704663**

TTCCAGCAAACATAAACCAGGCAGAAAAACGTGAAAAGGAGAGACAGGCCTAGCCTTCCAGCCTATGTCTTTCTCCCATGCTGGATGCT
 >chr9:105409139-105409398 + E=3e-144
TCCTGCCCTGGAATATCAGACTCCAAGTTCTTAGACTTCTAGACTTGGACTGGCTCTCCTTGCTCCTCAGCTTGCAGGCAGCCTATTAT

AGGACCTATTGATCATGTAAGTTAATACTTAATAAATTCCCATATATATATATATATATATATATATATATATATATAT|AT|GTATCT
 >chr9:1
GAGAAAATTTAATATAGACTGGAACTAGATAACAAGAAGTATATTTATATTTTAGATATAAAAATGACTGGTTATATACAAAATAGTAT
05409931-105410253 + E=4e-182
TCTTATACTGCAGATAACTTACTTACAAAATTCATTTTAATTAAAACCAGGAATTAGAATAATAGTAAAATATTTCATGCTAGAATTTT

AGATTATGTTGGTCAGTTTTATTTATTCTCATTTTTGTTTTGTTTCTTATTTTTACATATGCCATTAAATGGAGGAAAGTATGACACAA

TGCTAGTAGTATCTTCAGGTAATTGTTTCAAAATTGGTTCTAGTGAA
