# Supplementary material for: Chromothripsis during telomere crisis is independent of NHEJ, and consistent with a replicative origin
Source: HighWire-hosted journal article supplement (doi:10.1101/gr.240705.118), 2019-03-14
Supplement: Supplemental_file_1.zip [file contig.2.DB83_length_616_mean_cov_10.7142857143.docx]

**DB83_length_616_mean_cov_10.7142857143**

AAATCACATATGCTTATTTTATATAAAATTAAGTAGTATATGCTATATAATTAGGCAATATATAAATATGAATATGTATCTATCTAAAA
 >chr7:11898920-11899193 + E=1e-152 p=4e-02
ACTAATCTATCTATATAAATTATATATCTTTGTTATTAATAATATACAACAAATATGTCCCGGCCAAGATTATTATTGCCCTTAGGTGG

AATATAAAACTATAAAATATGATGTTAAAGTTCCATTTGTCTAGAATATTTTCCTTTTAAAGGATTAATATCTTCAAGTATTGACCCAT

TTG|TTT|TTATTCTCACAATTATCTAGTGCTGATTTTTATTAAAAGCATCTAGAGTCAGGTGGTTTGATTTGGAACGCTTATTTAAGC
 >chr7:11899890-11900236 + E=2e-196
GCAGATAATAATGTGATAATAATGTGATTATCCAATACATCTAAAACCTTCCATATTATATCCATTTATCTAAATTTTCAGAAATTTAA

AGGTAATCAATCATAACAAGATTCAAGTTCTTGAAACTATAATTTTTATTTCATTGAAAATAATTTAAATAAACCAACTATATATGTAA

ATTTTAAGTACATATGTAAAAATTTAAGTACATTCCATTGTGGATTATTTGCATATTTTAATTGCATGAATAAAGAGACTAAAA
