# Supplementary material for: Chromothripsis during telomere crisis is independent of NHEJ, and consistent with a replicative origin
Source: HighWire-hosted journal article supplement (doi:10.1101/gr.240705.118), 2019-03-14
Supplement: Supplemental_file_1.zip [file contig.2.DB83_length_620_mean_cov_10.0435483871.docx]

**DB83_length_620_mean_cov_10.0435483871**

CTTATTTCTCTCTGCCTGGTTTTCTCCCGAGTCTGGAAACTACCTGTGAGTATCCTTAAATTATGGCAGTATGGTTATTTGCAAAGGTG
 >chr2:10341087-10341411 - E=3e-177
CAATACAAGTCTGTTTTCTTTCTTTCTTTCTTTCTTTTTTTTTTTTGAGATGGAATCTTGCTCTGTTCCCCAGGCTGGAGAGCAGTGGT

GCAATCTCGGCTCACTGCAACCTCCACCTCCCAGGTTCAAGCAATTCTCCCTGCCTCAGCCTCCCGAGTAGCTGGGATTACAGGCATGC

ACCACCATGCCCAGCTAACTTTTGTGTTTTTTAGTACAGACAGGGTTTCGCCA|CA|AGAGTGGAAGAATTCACCCAACTCACAGGTAT
 >chr2:10340140-10340440 - E=8e-16
TTGATGGTGCACTTCCATGGCTGGGATTGGCTTTAAAAAGGTCTTATCTCAAATTCCTTCCATGAAACAGAGTTTTTTTGAAGCCAACT
9
TAAAAGGCCTATGTAAAAATAATTATTCTTGCTGCACCTTATACAAATAATCTGGCCACAGCTGGGTGCGGTGGTTCACTTCTGTAATC

CCAGCACTTTGGGAGGCTGACATGGGTGGATCACCTGAGGTCAGGAGTTGGAGATCAGCCTGGCCAACATGGTGAGACCCCATCTCCA
