# Supplementary material for: Chromothripsis during telomere crisis is independent of NHEJ, and consistent with a replicative origin
Source: HighWire-hosted journal article supplement (doi:10.1101/gr.240705.118), 2019-03-14
Supplement: Supplemental_file_1.zip [file contig.2.DB83_length_708_mean_cov_8.55367231638.docx]

**DB83_length_708_mean_cov_8.55367231638**

CAGGGCTGAAGGGGGTAGAGCTATC|AAAAAACCATTCCAAAAATCCGTGAATCCAGGAGCTGGTTTTTTGAAAAGATCAACAAAATTG
 >chr4:47247040-47247486 + E=1e-253 p=2e-02
ATAGACCGCTAGCAAGACTAATAAAGAAGAAAAGAGAGAAGAATCAAACAGATGCAATAAAAAATGATAAAGGGGATATCACCACTGAT

TCCACAGAAATACAAACTACCATCAGAGAATACTATAAACAGATTCACTTAAGGTTTTTTTCCTGCATCCAATAAGCTAAAATGTAAAA

CACACTATTTCCTAATATAACTTGCAATAAAAAATATCAAGTGACCAATATTAATTTTGTTCAGATAGCCTAACAGTTTTGCTTTGTAA

ATTCTAAGTTCTCAGTTATTCCCTCAGAGAAAGAGTAGGGGATACCAATGTTCAATTATTCATCACGTAAAATAGTCACACAAGGAACT

GAGTTTTCCTTGCTCCCTGGAAAAG|AT|ATATTTATATATATATATAAAATACCACAGTTTCTTTATCCACTTGTTGATTGATGGGAA
 >chr4:47248392-47248631 + E=5e-129
TTTGGGTTGGTTCCACTATTTTGCAATTGTGAATTGTGCTACTATAAACATGCATATACAAGTATCTTTTTCATATATTGACTTCTTTG

TCTCTGGGTAAATACCCAGTAGTAGAACTACTGGGTCAAATGGTAGTTCTACTTTTAGTTCTTTGAGGAATCTTCACACTGTTTTCCA
