# Supplementary material for: Chromothripsis during telomere crisis is independent of NHEJ, and consistent with a replicative origin
Source: HighWire-hosted journal article supplement (doi:10.1101/gr.240705.118), 2019-03-14
Supplement: Supplemental_file_1.zip [file contig.2.DB83_length_764_mean_cov_10.4057591623.docx]

**DB83_length_764_mean_cov_10.4057591623**

GCAAAGTGCAAATGCAACTATGGTAAATACCACCAGGGATGAGAATAGTCAGTTCACTTATCTCAAGTTAAATATGAGAGTAAAACTAC
 >chr2:78095031-78095435 - E=3e-228 p=1e-03
AATTTTAAGCCTAGAAAATACATGCTAAAGGCATATTAACTTGGAATTTGGAACTTACTCTATTGACTACATTTTTTTCTACATTGGAA

AAATCAGAAAAAAAAAGAAATGGAGAATTAAACATTATAGAAAACAAAAGAAGAGCAAAAATATGTTTTAATAGAAATTTTAAAAATAT

AGCACTTATCAAATTTGTTTCAACCATGACCCTGAATTTATTTTTGTTTCTTTAACTTAACTCATTGAAGAATGTGAAAGATCAATGGT

GTCTAAGTTTGATCAATAGAATAATATCAAAAATACTTTTTCACAAAT|TGTGA|AAGTTCCTGTTGTCAGTGCCAAGATTAACTGTGA
 >chr2:78093546-78093901 - E=1e-19
CCAGAAACTCCCCGTGCCACTCACTGGCTGTTTGAAAGAAACATCTGACAGAGACTTGGCTGATTTTGGGTCTAGAGACCACCTAATCA
5
GGGCTCAACTATTTTGGCCAATCAGAAATGAACAAGTTTGAAACTTTCATTTGTGTAAGTGGACCTGGTTGACAACCTAGGTGAGAACT

TTCCCTATTTAAGCCAGTCCCTCCCTTTGTTCTGTGGAGAGCATTCTTTTATTTCTATTGAATGTTATGCCTCCCCAGTCAATGGATTA

TTTTATAATAGAAATTAAGCTTTCCATTTTTTCTCCACAGATCTCATGGCCTTT
