# Supplementary material for: Chromothripsis during telomere crisis is independent of NHEJ, and consistent with a replicative origin
Source: HighWire-hosted journal article supplement (doi:10.1101/gr.240705.118), 2019-03-14
Supplement: Supplemental_file_1.zip [file contig.2.DB83_length_775_mean_cov_4.45161290323.docx]

**DB83_length_775_mean_cov_4.45161290323**

GTGAGAGATGAGTCTAACCTGTAAAGCTGGATGAGACATTCAAGATTAATGTTACCATATGAGAACCCTTTTTAACACAATCTAACCTT
 >chr3:157922446-157922804 - E=2e-197 p=1e-03
TCTGTTTTATTCACTCTCTCATATTTCTTACCTTTAAAATTCCCCATATAATGTTTTATATAATATAAATTTTATGCAATTACACAAGT

ATTATTCTAAAAAAGTAAACTTTGGTGAGGTGGAAGGCAAAAATTTAATGACCAGTAAAAATCATAGCTTTCTTCCACAGCCATGTAAT

TTTTAAAAACAAAACCAAAAGAAGAAAAAATTTTAAAAGGAACCATAAGCAAGGCAGTTCCTTGATTGACAAGTTTTATTCATTAAGCA

TA|AAATAATATGCTTAAT|GACATAAAATAATCATAAAATGATAGACTTAAATCTAATTATATCAATAAGTACATTAGATATTAATAA
 >chr3:157917931-157918332 - E=2e-226
ACAAAATATTGTAAAAAGGCAGTTTGTCAAATTAATAAAAAGCAATACTGTATGCCATCTAAAACAACAACTACATGCTATCTACAAAA

TATGTACTTTAAATAAGCAGACACAGATAGGTTAAAAGTAAATGGCCAGGCCGGGCGTGGTAGCTCACGCCTCTAATCCCAGCACTTTG

GGAGGCTGAGGTGAGGGGATCACGAGGTCAGGAGATCGAGACCATCCGGGCTAACATGGTGAAACCCTGTCTCTACTAAAAAATACAAA

AAATTAGCTGGGCATGGTGGCGGGTGCCTGTAGTCCCAGCTACTTGGGAGGCTGAGGCAGAAGAA
