# Supplementary material for: Chromothripsis during telomere crisis is independent of NHEJ, and consistent with a replicative origin
Source: HighWire-hosted journal article supplement (doi:10.1101/gr.240705.118), 2019-03-14
Supplement: Supplemental_file_1.zip [file contig.2.DB84_length_351_mean_cov_6.41025641026.docx]

**DB84_length_351_mean_cov_6.41025641026**

ATCAGTGACCTGCCTCTTGCCTGTCTGTATGTACAGTATTTAGTCAGAAGGTGGTGCCAAATAGGAGTTCATAGACACAACCTGTCTC|
 >chr16:73561244-73561335 - E=2e-43
AAA|CATGGTTTAAGCTGCTTCTGAGATGTGAAGTTCACAGCCAGCAGTTCTCCTCATCCCCGCTCAGAATTAACCAATAAATTAGAAT
>chr16:73560322-73560585 - E=4e-147
AACTAAGTGAGAAAGGGTGAGACAAAGACAGTGTCAAAACTGGAGGCCAGGGCCTGGGTCATTTTGAATATGAAACGAGGCCTGGTTTA

TGTTTTGTATTTTATAGGTTTTAAAACTAAGCTAAAGTATAACATTAAGGATCAAGGTCAGGGTGTTATCTTTTGTGGGGTGAACA
