# Supplementary material for: Chromothripsis during telomere crisis is independent of NHEJ, and consistent with a replicative origin
Source: HighWire-hosted journal article supplement (doi:10.1101/gr.240705.118), 2019-03-14
Supplement: Supplemental_file_1.zip [file contig.2.DB84_length_525_mean_cov_6.64761904762.docx]

**DB84_length_525_mean_cov_6.64761904762**

AATCAGATACAAGCACCATAAGCCTACTGGGGTTATGATAAAAGAGTGTCCTCACTGCACGTTGTAGGTATTGTAACCCAATTTTCTGA
 >chr16:78867196-78867479 - E=7e-148
ACTCGCAGAAGAGGACAATGATGAGGAAGGAGAATAGAAAGCAGGAGGAGGAGGAGGAGGAGGAGATGGCTGGGCCATTAAGTAAACAT

GAGAACAGCCACATTAGAGAAACAAGCTGTATGCAGGAAAGAGTGCAAGTTGAGGACTGGTATAAAGAAAGAGCTTGTCATCCCAGTGC

TTTGAGAGAA|GCACTCC|TTCTTGAGAAGGAGTTTCGCTCCTGCTGCCCAGGCTGGAGTGCAATGGTGCAATCTCGGCTCACCGCAAC
 >chr16:79033131-79033372 - E=2e-127
TTCCGCCTTCTGGGTTGAAGCGATTCTCCTGCCTCAGCCTCTCGAGTAGCTGGGATTACAGGCATGTGCCACTACGCCTGGCTAATTTT

GTATTTTTAGTAGAGACAGGGTTTCACCATGTTGGTCAGGCTGGTCTCGAACTCCCGACCTCAGATGATCCGCCTGCATTGG
