# Supplementary material for: Chromothripsis during telomere crisis is independent of NHEJ, and consistent with a replicative origin
Source: HighWire-hosted journal article supplement (doi:10.1101/gr.240705.118), 2019-03-14
Supplement: Supplemental_file_1.zip [file contig.2.DB84_length_634_mean_cov_7.57097791798.docx]

**DB84_length_634_mean_cov_7.57097791798**

CCA|TTTTTCAAACTCAAACTCTTCTAAATAGAAACAATGAAGATCCATTTAACTGCATTTATGTAAAATAAAATAAAACCCCAGATAC
 >chr4:126354202-126354574 - E=4e-212
TCTCCTTTTCTGCTTAAGATACTACTTTACCTTCAATAAAGTTATTTCCCTTAATATGACATTTAAATTCTACTTAACTTTACCATTCA

ATATTCTGTAAATAAAGCCACTCATTCATTTATTTGTAAAATGTTTATGGAGTGCCCTCATTATCACAGAATGGTATTGAGATTCACAA

CCTTACCATATTATTTTCTAATAGTCAAGTGATTTGCTGGTATTTCCTTTACCACTATTCAATCATTCTTCTATGTTCTTAGATTGTAA

TTACTCGTGGCCTAGTACCA|TAATGA|ACATTAATATTTGGTATTCTAAAGTGTCTGGTGATACACATATGGAAAACCACATTAAATT
 >chr4:126352091-126352344 - E=2e-137
ATGACTGACTCATTTGGACAAGAATATGTGATTTCTTTCTTTGTCTGTAAACCATATATTACTGTAGATACATTACTACTGTAGATACA

TTACTGTAGATACTGTAGAAAGCAAATGCTGGGGGGAGTAAAAAATGAGCCCTGTTTATCAAGGAAAGCTTACAGCAAGTTCAGTCTCA

CTGTGTTCATACCA
