# Supplementary material for: Chromothripsis during telomere crisis is independent of NHEJ, and consistent with a replicative origin
Source: HighWire-hosted journal article supplement (doi:10.1101/gr.240705.118), 2019-03-14
Supplement: Supplemental_file_1.zip [file contig.2.DB84_length_655_mean_cov_9.16030534351.docx]

**DB84_length_655_mean_cov_9.16030534351**

ACCTTTTTATTTACAAAAAGAAGTTGTTTCTAACATATTCTTCTTACAAGTGTTACTTTTCCATAAATATAGGATAGAGGAAATGAAAT
 >chrX:146734066-146734390 + E=3e-183
GCACAGCGACATATCTACCTTTATACACTGTAGAAAACACTATAGAACGTTTAGAACTAGCAAAGGAATAGTTCTATCTCATTTGTTAT

TTTTATAGTCTAGTGATTTTGTGGAATCACTACATCATGGTGTAAATGATGTATAAAATGAAAAATGATCAGTTTCCTTTGCATGGAGA

ATATAGAGGATGCTTTGTAATTTATTTCCTACCTGTACTGTTGGCTACAGTAAA|AGC|AGCAGCTCGTTTGTTTGTAATTAGAATTCT
 >chrX:146761457-146761791 + E=3e
GAATTTTCGTAAGATTTGTGTAGGATTCATGATCTTAAATGCTTTAGAACCACCATCATAAAATAAATTCAATTTTTCTGAAGGTAGGC
-186
ATTTTAATTGCCTGCTCTTCACCTCATTGATGAGGGAGGGATTCACAGCCTAGGGTTATGGAGATGGCCAAACATGACACCTGACACTG

CACAGGTGAGATCAATAGCAATTTGTCAGTCACAATCCAGTGGAGGAAGACACTACACACCATGCAGGGCCAAACAGGGGTTGCACTTG

TAAAGAGTGAACATGTAATCACTGTGGGAGGCAG
