# Supplementary material for: Chromothripsis during telomere crisis is independent of NHEJ, and consistent with a replicative origin
Source: HighWire-hosted journal article supplement (doi:10.1101/gr.240705.118), 2019-03-14
Supplement: Supplemental_file_1.zip [file contig.2.DB84_length_674_mean_cov_7.78931750742.docx]

**DB84_length_674_mean_cov_7.78931750742**

GTCAAAGCTGGGCTGTTCTTGTGTCATGAAACTCACTGAAGCAGCTGAGTTATTATATTGGTGAAATTAATTATTAAAATGAAGACATG
 >chr8:36334392-36334834 + E=3e-254
CTTTGTTCTGCTTTAAAAGAAAGATAAAAGCTTGAACAATTAAAAATGGTTTTCTATTATAGCTAATGTGCAATATGGATTCCAACATA

ATTAGTTAAGTCTGCAAAATTATTTTTATATTATCTAAGGCTTCATTTAACACATTTATACATTCATTCATTTATTCGCTCAAAAATAT

TGTCTTCTGAGCACCAAATCTTGTGAAGGAAAATGGAAATATAAAAGTAAGTAAAACTTAGGTCTTGTTGTTTGTAAGCTCTTTACTTA

ATATATCTATGAATTCCCTTGGTCCAGGAAGTAAACAGGGTGTTAAATGGACCGTCTGTGGTTCTCTTTCCAAAAACCTGACGTT|T|A
 >
TAATAATAAAATAATAATAATAATTGAGTGACTCCCACAGGAACAATGAGTACCTCTAACTGACCCGATCTCTGTTTCAAGATACTAAT
chr8:36338930-36339163 + E=2e-125
TTTATCTATAATCGTCTAGGCTTCCTGGAGAAATAAGTGATTCCAGGTAAAACTTCCAGGCAAGCTTTGGACAGTTTAGTGTGCTGGAA

AGCAAAGATCTATTTAAAGCATAATTAAGTTGTGTCAATAGAAGTTAGGATCT
