# Supplementary material for: Chromothripsis during telomere crisis is independent of NHEJ, and consistent with a replicative origin
Source: HighWire-hosted journal article supplement (doi:10.1101/gr.240705.118), 2019-03-14
Supplement: Supplemental_file_1.zip [file contig.2.DB84_length_677_mean_cov_8.64106351551.docx]

**DB84_length_677_mean_cov_8.64106351551**

AGAGTGATCTTTTCTCAGGGCCATCCCCCTCCATTTTGTTCCTATTCTTTCTAATTCCTTCAAAAAAATCAGATCAGCTTTTCTTTCAA
 >chr6:19370603-19370986 - E=1e-218
GACTCAAGTAAATTTTAAAAAGTCAGGATTGATTTCTTACTGTGAACAAATTGAGGCATCAAAGTAAAGTTAAGAGGTTCCTTCCCACT

CTGTTCTTCTGCGGCTGCTCTGGTCGTATACATTTGAGGACGGTAAATATTATCATGGAGACTTAGCTGTGTTATTATAAGCTTACATT

TTACATATGCTGATTTGGGAGGACCTAAATTTACTACTGTAACATGGCATCACCTCTGGCTTTTACACACAGAGAGTGGCACAATTTTC

TTCCATTTTCTTCATGTATATGTTGA|A|TTTTTATTTGCTGTGAGAAAATAATTTGTATGCACCAATAAAAGTAGGAACTCCCTTTAC
 >chr6:19369176-19369471 - E=1e-165
CCTGACCTTTTGCCTGACTTTAGGTTGGCTGAACAATTGACCATATCTCTCCCATTCTCTTTATAAGGAGAAGAGGAAGAAATGTCTTC

CCATTTTGGCACACAGAACACCAGGAAGAAATGTGTTTAACCCATACAAAGCACACTCCATTGATATGTAGTATATCTCTGTTCCCAGT

TGCTCTACTTGTGGGATTCTCTTCTCTTGACCTTTGCTCTAATAACAGAAGTGTGC
