# Supplementary material for: Chromothripsis during telomere crisis is independent of NHEJ, and consistent with a replicative origin
Source: HighWire-hosted journal article supplement (doi:10.1101/gr.240705.118), 2019-03-14
Supplement: Supplemental_file_1.zip [file contig.2.DB84_length_721_mean_cov_6.86546463245.docx]

**DB84_length_721_mean_cov_6.86546463245**

TGGTAGATCTACTTTTAGTTCTTTAAGGAATCTCCATACTGTTTTCCATAGTGGTTGTACTAGTTTACATTCCCACCAGCAGTATGTGA
 >chrX:95966214-95966538 + E=4e-183
AAGTGTTCCCTTTTCACCACATCCATGCCAACATCTATTATTTTTTGATTTTTAGATTATGGCCATTCTTGCAGGAGTAAGGTGGTATC

GCATTGTGGGTTTAATTTGCACTTCCTTGATAATTAGTGATGTTGAGCATTTTTTCATGTTTGTTGGCCATTTGCATATCTTCTTTTGA

GAATTGTCTATTTATGTCCTTTGCCCACTTTTTGATGGGATTATTTGTTTTTTTCT|T|TTCAACTTTTGTTTTAGATCGGGGTACATA
 >chrX:95773189-95773587 + E=1e
GGCAGGTTTGTTACATGGGTATATCACACGATGCTGAGGTTTGGGGTACAGTTGAGCCCGTCACCCAGAAAATGAGCATAGTACCCAAA
-227
AGTTAGTTTTTCAACCACTACTCACCTCCCTCCGTTCCCCCTCTAGTAGTCCCCAGTGTCTATTGTTGTCATCTTTATGTCCACGAGTA

CCTAATGTTTAGTTCCCACTTATAAGTGAGAACATTCAGTATTTGGCTTTCTGTTTCTGCATTAATTTTCTTAGGATAATAGCCTCCAG

CTGTATCCATGTTGCTGCAAAGGACATAATTTCATTCTTTTTTATGGCTGCACAGATTCCATGTTGTATATGTACCACCTTTTCTTTTT

CCAAGCCACCA
