# Supplementary material for: Chromothripsis during telomere crisis is independent of NHEJ, and consistent with a replicative origin
Source: HighWire-hosted journal article supplement (doi:10.1101/gr.240705.118), 2019-03-14
Supplement: Supplemental_file_1.zip [file contig.2.DB84_length_876_mean_cov_8.56164383562.docx]

**DB84_length_876_mean_cov_8.56164383562**

GGAATGGAAAGGAAGAAGTAAGGAGAAAATGGTTGTTAAATAGTGGGTGAGAGTCTATACATTAAAAGGAGAGCGTGCATGCTCTAATG
 >chr1:68732460-68732772 - E=6e-171
TACTTTATAATAAATGTGGTCTATTTGATTAATGCTGCCAGCTCAAATTTGGGTCTTCTGGAAAAAAAAATGATGAAACCATCTCCGGA

GACATTTTGTATTCAGTTCATTTAATATTTATACTGAGTTTCTTAAGTCAGCATCCTCAAGGAGACCAAAAATGATGGTTGGAATATGG

AGAGTAATGCTCAGGAGGATGGGGTAAGAGCACTCCCCACTCAC|TATACTATACAAAATAA|CTATACTAGTTATTTTGAAGTCTTTG
 >chr1:68836038-68836586 -
CTCCACCAAATCTAACATCTGTCCCATCAGAAACAGTTTCCATTGTTTTTCTTTCTGTGTGTGGTCACACTTTCCTGGTTTTTTGCATG
 E=9e-312
TCATTTCTTTAACTGGACATTTTAGATAATATATTGTAGTAACTCTGGATTCGTCTCCTCTCCAGGGTTAGTTGCTGTTGCTACTTTTT

TGATTTGCTGAATGACTTGCCTGGATAAATTCTGTAGAATCTATCTCACAACAGTGTGCAGCTCCTGTTGTTTCTGTTCAGGTTCCTTT

TTAAAATTTATTTTTGTTTAATTTTTAAATCTGGCTTCCCATGAGTCACTCCTGGATTAGCATAGCTTAATGATCAGCCAAAAATTGAT

CAGAGGTTGCACATAAACGTATTGAGCCAGTAAGCCTTCTGCTCTTTGCCAACAGATCTGTGTGTTTAAGGAATGTAATCAAGGCTGGG

CATGGTGGCTCACACCCTGTAATCCCAGCACTTTAGGAGGCCAAAGCAAGAGGATCACTTGAGACTAGCAGTTTAAG
