# Supplementary material for: Chromothripsis during telomere crisis is independent of NHEJ, and consistent with a replicative origin
Source: HighWire-hosted journal article supplement (doi:10.1101/gr.240705.118), 2019-03-14
Supplement: Supplemental_file_1.zip [file contig.2.DB85_length_657_mean_cov_7.98477929985.docx]

**DB85_length_657_mean_cov_7.98477929985**

TATCTGCTACAGACAATAAAAATTATTATCTCTTAAAATAACTCCAAACAGAAAAATAACTAGACATAGTGGCTGCACTGTACATTGTG
 >chr3:187299301-187299678 + E=5e-194
TTCATTCATGAAAACAATTATGGCGCTAAATAAAAAGACAATAGAAATTATTTTCTTCTTTTTGTTTAAACTTTTATTTTAGGTTCAGG

GGTACATGTACAGGTTTATTATATAGGTATTCATGTCATGGGGTTTGTTGTGCAGATTATTTCATCACTCAGATACTAAGTCTAGTACC

CAATAGCTATTTTTTCTGATTCTCTCCCTCCTCCAACCCTCCACCCACCAGTATCCCCCAGTGTCTGTTGCTCCCCTCTTTGTGTCCAT

ATGTTCTCATCATTTATCATC|TGACTGAGCTGCTGAACACACATCGCTGTGCTATTTCATCCTACTCAGCTTAGCACTTATGACCCCC
 >chr3:187480262-187480542 + E=1e-156
TGTGACTATTTAGTAATTGCACTGTCTCTCCTCTTGAATGTGAGTGCCTGGAGGTCAGTAGCTATTTGTTTCTTCTCCTTGGTATCTTA

ATCCTCTCCTGGTGCCTAAGATAAGCAACTTACCCATCTCGCACATGTTTTGAAGGAAGAGGACCCAATAGACTGAGACTTTTACTGGA

GTTTATGCACCTTTATTTATCTTCTCATATTTTCA
