# Supplementary material for: Chromothripsis during telomere crisis is independent of NHEJ, and consistent with a replicative origin
Source: HighWire-hosted journal article supplement (doi:10.1101/gr.240705.118), 2019-03-14
Supplement: Supplemental_file_1.zip [file contig.2.DB85_length_659_mean_cov_8.13960546282.docx]

**DB85_length_659_mean_cov_8.13960546282**

ATTCCAGCTTCCAAAATGTTTTGCTATTTTTCTGTCTTCCATTTTGTGTACATATGCTTTAAAAAATAAAAACCCTTAAGGTCTATGTA
 >chr3:196598584-196598842 - E=1e-132 p=0e+00
TTTGACTGTATTTTTTTTTTTGGAGATGGAGTCTCACTGTGTCACCCAGGCTGGAGTGCAGTGACCTGATCTCGACTCACTGCAACCTC

CACCTCCCAGGTTCAAGAGATTCTCCTGCCTCAGCCTCCTGAGTAGCTAGGAGTACGAGTGTGTGCCACCATGC|ACACA|CTCTTTGT
 >chr3:1
CAGTGATTTTTTTTTTAGAGGAGTGTCGCTCTGTCGCCCAGGCTGCAGTGCAGTGGCGCCATCTCGGCTCACTGCAAGCTCTGCCTCCC
96593322-196593633 - E=1e-164
GGGTTCACGCCATTCTCCTGCCTCAGCCTCCTGAGTAGCTGGGACTACAGGCGTCCACCACCACGCTTGGCTAATTTTTTTTGTATTTC

TTTAGTAGAGACCGGGTTTCACCAAGTTAGCCAGGATAATCTCGATCTCCTGACCTCGTGATCTGCCCGCCTCAGCCCCCCAAAGTGCT

GGGATTACAGGCGTGAGCCACCGCACCCAG|AGATCGGAAGAGCGTCGTGTAGGGAAAGAGTGTAGGATAGGGTGTAGATCTCGGTGGT

CGCCGTATCATTAAAAAACCTACGCGAGGGCCCCACACT
