# Supplementary material for: Chromothripsis during telomere crisis is independent of NHEJ, and consistent with a replicative origin
Source: HighWire-hosted journal article supplement (doi:10.1101/gr.240705.118), 2019-03-14
Supplement: Supplemental_file_1.zip [file contig.2.DB85_length_771_mean_cov_6.42023346304.docx]

**DB85_length_771_mean_cov_6.42023346304**

TGTGACTGCTGGTGTTTTAGTAAGACAGAAGGGTACAGTGTTTACCCTGTACATGGTCAAGTGCAATGGTCAGGACACGTAGGGATGTT
 >chr12:120191906-120192217 - E=3e-172
GCAGGAATACAGCAACATGTTACATGGACTCTTGAGCCAGACTTTCTGGGTTTGAATGCCAGTCCTGCCTTTTAAAAAGATTTTTATAG

CTGTGTGACATTTGCTCAGTTACCTAATCTCTCAGTGCCACAGTTTGCTTATCTGTAAAATGGAGGTAATAGTAGTACCTCCCTTAGTG

AGTTGTTCTGAAAATGAAATGAGTTAATTCAGGGCCCAGTGTG|T|GATCTTTAGGACCACACTGTCCATGTTTGTCAGGTCAATAGAT
 >chr12:120190491-120190952 - E=2e-256
GTGTCGTGGTCTCCCTCACCCCCATACCTTTGGATGTCTTGCTTCCCCTGCCTGGAATTTTCTTTCACCTCTTACCTGCTTGTTTGACT

CCTGCATATTCTTCAACAGAATTTAACAGATCCAGAGTTAGCTCCTCTACCCACCTGCGGTATTCCTGCAACATCCCTATATGTCCTGA

CCGTTGCACTTGACCATGATATATGGTCCTGGTTGGTTTTCATTTTTCTCCCCACTTGAAGGCAGAGACTGTCTTTCATCTCCATATTC

CATTTTCCACAGAAATTGCTGAGTAAATTTTTGTTAAATGAATGATGAAAGATTGAATAGATAGGTGGATGGATGAGCAGATGGAGGGA

AGAAGGATTAACTTCTAATGTGACATTAAAGCAGATTACCTAATGAGGACACATCAGAGAA
