# Supplementary material for: Chromothripsis during telomere crisis is independent of NHEJ, and consistent with a replicative origin
Source: HighWire-hosted journal article supplement (doi:10.1101/gr.240705.118), 2019-03-14
Supplement: Supplemental_file_1.zip [file contig.2.DB86_length_311_mean_cov_4.34083601286.docx]

**DB86_length_311_mean_cov_4.34083601286**

TGAATCTATATTTTACCTTAACTTTTATTTATTTTTATTTTTTAAATTTTATTTTATGAATATCTAATCTGCCAGCATTTTAGAAATTT
 >chr1:57072958-57073164 - E=8e-113 p=9e-03
GTTTCTATTTTCTAAATTTTATTTTATGATACTTTCACTTTTAAAGGATATTTTTTCTGGGTATATAGTTCCAGATTGACAGTTTCTGT

CCCATTTCAATACTTTATGTTGTT|ACAT|AAGATTTTTCTTTAGTTAGAACTCAGTTACATAGAAATGTAGCAATCATGCTTGGTTGA
 >chr1:57153289-57153398 - E=3e-54
TGACACTTGTCTTCAGTAGTCCATGAATGACCTTTTATTTAATTAC
