# Supplementary material for: Chromothripsis during telomere crisis is independent of NHEJ, and consistent with a replicative origin
Source: HighWire-hosted journal article supplement (doi:10.1101/gr.240705.118), 2019-03-14
Supplement: Supplemental_file_1.zip [file contig.2.DB86_length_451_mean_cov_7.24168514412.docx]

**DB86_length_451_mean_cov_7.24168514412**

TATTGGCAGCCCCTAGGAAGAGAGAAGCTCGCCTCACATGAGCACAGAACTACTCTTCTTTCCTTGTCTTCCCACGTCCCATTGTGTCC
 >chr5:177857265-177857517 - E=4e-134
TTTCCAGGGGACTATGAGCCCCAGGATGGAATTGTGCAACTGGTGCCATTGATGTCCTTAGGAAATCGGAACCCGTTTCTGGAATTCTT

GACAGTGAGTGGCAGAATTCCAGTGGGCAGAGACCCAGGAACCTGGGGCCCCAGTGAAGTCACCTGTGTGTCT|T|GAAGTCAGGAGTT
 >chr5:1774283
TGAGACTAGCCTGGCCAACATGGTGAAACCCTGTCTTTACTAAAAATACAAAAATTAGCCGGGTCTGGTGGCAGGCACCTGTAGTCCCA
14-177428514 - E=9e-88
GCTACTCAGGAGGCTGAGGGAGGCAAATCACTGGACCACAGGAGGCAGAAGTTGCGGTGAGCCCAGACGGTGCCCCTGCACCCTAGCCT

GGGCAACA
