# Supplementary material for: Chromothripsis during telomere crisis is independent of NHEJ, and consistent with a replicative origin
Source: HighWire-hosted journal article supplement (doi:10.1101/gr.240705.118), 2019-03-14
Supplement: Supplemental_file_1.zip [file contig.2.DB86_length_463_mean_cov_5.83153347732.docx]

**DB86_length_463_mean_cov_5.83153347732**

CACCCCTTGCCAGAGCTGGGGACCCAAAGCGCTGAGCACCGTGAGCTCTGCTCACAAGGGTGTGGCACCCTCTGGTCTGGCAAAGCCTT
 >chr5:175827482-175827712 + E=7e-127
TCCAATCCAGGTCCAGCCACACCCGCTCTGGCACCCACGCCCTCCGCATTCCTGTCTGCAGGCATCCCACTCCAGCTACCCGGCCTTTG

TCTCCTGGCGCTTCTGTCTCCCCTCCCAGCAATAGTCTCCCCTCCCTC|CTCC|GCCTCCCGGGTTCACGCCATTCTCCTGCCTCAGCC
 >chr5:177412178-177412415 - E=4e-128
TCCGGAGTAGCTGGGACTACAGGCGCCCGCCACCACGCTCGGCTAATTTGTTGTATTTTCAGTAGAAACTGAGTTTCACCGTGTTAGCC

AGGATGGTCTCGATCTCCTGACCTCGTGATCCGCCCGCCTCGGCCTCCCAAAGTGTTGGGACTACAGGCGTGAGCCACCGCGCTCCGCC

GAGGAGATACTCTAGAAGCT
