# Supplementary material for: Chromothripsis during telomere crisis is independent of NHEJ, and consistent with a replicative origin
Source: HighWire-hosted journal article supplement (doi:10.1101/gr.240705.118), 2019-03-14
Supplement: Supplemental_file_1.zip [file contig.2.DB86_length_507_mean_cov_5.51084812623.docx]

**DB86_length_507_mean_cov_5.51084812623**

TGATATATAAGGCATCTGTGAAATGAGATGCTGGAAGAAATACATATATAAATGAATAAATTGAGAGCAAATAAGGGCCAAATTTCAGA
 >chr3:82109510-82109772 - E=4e-146 p=2e-03
AAGACTAAACTCTTGTAAACTGAATATGAAGGCCTACAATGCTTATCAAGTCAGAAAAAATGTAATCTATTCAAAATGGAATCATAGAT

TTACTTGGGTTCAGCTTTATGGCCTCCTTCAATCCAGGTTGACATTATTTGTGCAACACTGACTTAAAAAGTGT|TTTTAGTACA|GTA
 >chr16:80912
TAGAGTAAAAATAGATTATAGTAAAAAGTATTTTTTTAATTTAAATTGTTTGTGTATTGGCCAGGCACAGTGGCTCACACCCATAATCT
658-80912913 + E=7e-139
CAGCAATTTGGGAGGCCAAGACGAGTGGATCATTTGAGATGAGGAGTTTGAGACCAGCCTGACCAACATGGTGAAACCCCATCTCTACT

AAAAATGCAAAAAAAAATTAGCCAGGCATGGTGGTGCATGCCTGTAATCCCAGCTACTTGGGAG
