# Supplementary material for: Chromothripsis during telomere crisis is independent of NHEJ, and consistent with a replicative origin
Source: HighWire-hosted journal article supplement (doi:10.1101/gr.240705.118), 2019-03-14
Supplement: Supplemental_file_1.zip [file contig.2.DB86_length_616_mean_cov_8.76136363636.docx]

**DB86_length_616_mean_cov_8.76136363636**

ATTCTCCAGCAATAAGCCGTACACTCAGCTGTATCCAGTGGCTAGATAGTTCCTGAGAGATGTGTCCACAGTTCACTCAGAGTTCCTGT
 >chr11:88286481-88286816 + E=7e-190
TCCCCCTCATTTTCCTCTGATGTTCCTTCTGTGCCTTTTCTGCATTGTCATAATGTGTCTGCCTGAGTCAGAGCACAATGTCTGGTGTG

CCTGACTCTCACTAATGGGCCAAGTGTGGTCCTGCTCTCTTTAGCTTCTAATCAAGACTCCAGTGGGATCCAGAGTAAAAGTGAACAGG

CCACAGCATAGGGGAAAATTAAGATGGATGGTATAGCACAGCAGGAGCTTGTTTATCCCTGA|GGAATA|GCATGTGACCATGTTTGGG
 >chr11:88287581-88287824
GGCCATCATCTGGCTACTAAAGAGGACTTCCAGGTTGATATTATTCTATCCTATTACTTCCCTTGTTTTATTCATGCTATTGAAGATGT
 + E=3e-103
AATAAGATTTTTTGTTTTTTGTTTAATTTAGCTTTTGTTTTTACAGCAATTCTACATGATGATGCTGAGATAATCGCTGATTTATATCC

CAAGTTTTTTTCTAATTCCCTGTTAATTAACTTTGTTACTGCATCT|TTCTCTGGTGCAGTTCTTTGATTGGTCATGTTTGTACG
