# Supplementary material for: Chromothripsis during telomere crisis is independent of NHEJ, and consistent with a replicative origin
Source: HighWire-hosted journal article supplement (doi:10.1101/gr.240705.118), 2019-03-14
Supplement: Supplemental_file_1.zip [file contig.2.DB86_length_648_mean_cov_5.80864197531.docx]

**DB86_length_648_mean_cov_5.80864197531**

TAACATATATAGCATAATTTTTAACATTATATGGATCTCTACATATAGAGAAAAAGAGACATTATACATTGTGTGTAGATGGATAGATA
 >chrX:7405328-7405601 - E=4e-141
GATAGATAGATAGATAGATAGATAGATAGATAGATAGATAGATAGAAAGAAAATTTCAATTTAAAGCTCAACTTTTCCCAATTACCTTT

TTCAAAAAGTTCTCAGTCTAAAATTCAACAATCTTTGCATGCAGCTGAATCAAGAAGAGGTTTAATCTCCCATTATTCTCTGTACACAG

AACCAATATCTTTT|AT|CTTTGTAGGGAAATGGATGAAGCTGGAAACCATCATTCTCAGCAAACTATCACAAGGACAAAAAAACCAAA
 >chrX:7369534-7369859 - E=8e-184
CACCATATGTTCTCACTCATAGGTGGGAACTGAACAATGAGAACAAACGGACACAGGAAGGGGAACATCACACACCAGGGCCTGTTGTG

GGGTGGGAGGAGGGGGGAGGGATAGCATTAGGAGATAATACCTAATGTTAAATGACAAGTTAATGGGTGCAGCACACCAATATGGCACA

TGTATACATATATAACAAACCTGCATGTTGTGCACATGTACCCTAAAACTTAAAATATAATAAAAAAAAAAAAAGA|TGCCAATTTAAG

ACGGCTCATTTCTTTTTTATCAGTTGCC
