# Supplementary material for: Chromothripsis during telomere crisis is independent of NHEJ, and consistent with a replicative origin
Source: HighWire-hosted journal article supplement (doi:10.1101/gr.240705.118), 2019-03-14
Supplement: Supplemental_file_1.zip [file contig.2.DB86_length_666_mean_cov_8.52552552553.docx]

**DB86_length_666_mean_cov_8.52552552553**

GCCCTCCCCCCGGCCCCCCCCACGAGGCCCGCCGCCCCTCCCCACCC|CCCATGGACCCCACATACTGCCCCCGACTCCCCACAATGCC
 >chr9:137655619-137655905 - E=3e-157
CCCAGACCCCACCACGCTGCCCCTGGACCCCCACAACAACCCTTGAGGGCCAGGCTTGCTCCTGTAGGCAGGCTCAGACTTCCTCCTGG

AGTTGCCAGCCAGCCTCGCCTGTGCCTCCTCTCTTTGGCTTCCCTGGGAAATGCCCAGGTCCGTCTGTTCTCAGGTCGAGCTCTCTCTC

TTCTAAGCTCCTGGCTGATCCCAGATCCTGCTCCAGCAGGAGCCTTGGACAAAGCCTTTCTCCACAC|GTTT|CTTTGGGAGGCCAAGG
 >chr9:140805805
CAGGTGGATCCCCTGAGGTCAGGAGTTCGAGACCAGCCTGACCAACATGGTGAAACCCCGTCTCTACAAAAAAAAATACAAACACTAGC
-140806134 - E=3e-183
TGGGCGCAGTAGCGCATGCCTGTAATTCCAGCTACTCGGGAGGCTGAGGCAGGAGAACTGCTTGAGCCCAGGAGGCAGAGGTTGCAGTG

AGCCGAGATTGCGCCATTGCACTCCAGTCTGGGCTACAGAGCGAGACTCCGACTCGAATAAATAAATAAAGAAAAGATAAATATCTCAA

AATAAAAAAAGAAAAAAAGGACAATAAAAACCCTTCTATTCAAACC
