# Supplementary material for: Chromothripsis during telomere crisis is independent of NHEJ, and consistent with a replicative origin
Source: HighWire-hosted journal article supplement (doi:10.1101/gr.240705.118), 2019-03-14
Supplement: Supplemental_file_1.zip [file contig.2.DB86_length_739_mean_cov_6.48173207037.docx]

**DB86_length_739_mean_cov_6.48173207037**

TTTAAGTTCAAATTGCATTATTCTAAGAAGCTGTCACTTATGATAGACATTTAAGGCAACTTCCATTTAATTTGTTGATAATTTCTTTC
 >chr3:81745302-81745604 - E=7e-170
TTATGCCACAGGTAGCTTATCTGAGTATCGTTTTGCATTGTGGAGAGGTTTACAGAAATGTGGTAAATCTGTCAAAGCTGTACAGCATT

GTTTTTGCTCATCCAAGCAGTTGTTTCATGCAGGTGAATTGGAATTCACTGATTAGTCTTGACGCTTGGTCTGGTTTATTGTCAGGCTT

TGAATCTGTAGCTCTCTCTTCATTTCAGATTATT|T|AACTAGAAGGGAAGAATTGTAATGTTTCCAACACAAAGAAAAGGTAAATGTT
 >chr3:81874665-81875103 - E=1e-251
TGAGACAATTAATATTCCAATTACCCTGATTAGATTATTACACATTTTACATGTATACATGTAAAATATCACATGTATTCCCAAAACAT

GTACAACTATTATATATCAATTAAAAAAAACAAAGATAGTTTAGCATTTTTAAAGGAGGGGTACCAAAATTCAAACCCTATTATGTGAG

CTAAGTAACAATGAACATGTAAAAGGGCATGGAAAAGAAATATGAAAGATTAAAAGAAAGACTTCCATAGACACAGATATGCAGCATAG

ATTAGCTATTTTGTATTGTTCTTTGAAATATAAACTGAAATTCACTGCACTGTCATTTAGAGTTACTTTAATAAAAATATATTTGTTTC

TAATTTTTAGAAACTGGGCACTTGTGGTC
