# Supplementary material for: Chromothripsis during telomere crisis is independent of NHEJ, and consistent with a replicative origin
Source: HighWire-hosted journal article supplement (doi:10.1101/gr.240705.118), 2019-03-14
Supplement: Supplemental_file_1.zip [file contig.2.DB87_length_272_mean_cov_3.86029411765.docx]

**DB87_length_272_mean_cov_3.86029411765**

TCCTGAAACAGGAGCTGATGAATTCCAGCGTGATGGAGGAGGGTTTGGATTGAACTCCAGGTGTCAATGAGGGACCTGGTTGGACACTT
 >chr18:10966068-10966168 - E=6e-49 p=2e-02
TCATTTTTGCA|ATTTTATAGATTCTATAAATTCGATTATAAATGCAAATTTTTAGAGTTGTGTTAATTTACAAAATTTTAACTTAAAC
 >chr18:66908133-66908305 - E=2e-92
CCTAAAGCCTTTCAATGACAATTCTAAATTCCTCTTTCATTTATTTAAGATTTTGTCTACATTTAGTTAAGAAATGCAAATACTTGCAG

ATTTGA
