# Supplementary material for: Chromothripsis during telomere crisis is independent of NHEJ, and consistent with a replicative origin
Source: HighWire-hosted journal article supplement (doi:10.1101/gr.240705.118), 2019-03-14
Supplement: Supplemental_file_1.zip [file contig.2.DB87_length_696_mean_cov_23.349137931.docx]

**DB87_length_696_mean_cov_23.349137931**

TGATGATGTTGACAAGAGCCAGGTCAATAGAGTGGGACACAGTAGCCTTTTGAGAATGAATTGAGGAGAACCTGGTGCTACCACTCACG
 >chr7:159044366-159044660 - E=4e-165
GTCATGGTGTGGAACAGGAAAAACATGGGGTTTCAAATGTGCAGGTCTTCGTGTTCATTACAAAGAAAGACCAACCATATTTTTAAAAT

ATTTTGCTGTATTTCGTAGCTTAAAATATTGAGAAAAAAATGATCTGATTTCCTAAAGAGACCAGGTGTTACAATGGAAGACCTACTTT

CTAGGAAATAAAATTCTCACATGAATC|TGTCTTATTTAGCACCTTGTCAATGATTTGTACTGTTACTCTAGATATACAAGAAATATTT
 >chr7:159056215-159056617 - E=4e-230
TCTGTCATTGAAGTTCAATAACTTGAACAGCATGTATTTTGGTGTTGAGCATTCTGTATCAACTATCCCTCAAAGGGCATATACTTTTT

AAAATTATAGATTAAATTATTCATTTTGGGAAAATTCTATATTATAAACATCTTCCCTCTTTCCTTCACTGATTTTTCTACTTTAGGGA

TGCCAATTATTTTTATTTTGGACCACCCTTGTCTTTCTTCATCTTTCTCTCTTTCTTTTCTTTCTTTCTTTCTCTCTCCCTCTTTCTTC

TTTTTGATTTGATCTTCTCTTTCCAAAAGTAGTCACTGTGATTATGTCAAAATTTTTATTTTGGTCAATAATTA
