# Supplementary material for: Chromothripsis during telomere crisis is independent of NHEJ, and consistent with a replicative origin
Source: HighWire-hosted journal article supplement (doi:10.1101/gr.240705.118), 2019-03-14
Supplement: Supplemental_file_1.zip [file contig.2.DB88_length_411_mean_cov_5.10462287105.docx]

**DB88_length_411_mean_cov_5.10462287105**

AAAAATCCTTTGAGACTACTTATAACAAAAGACATAAAGTCAAAATCACATGGCCTTTTAAATATACCATGTGCAGGCCAGATGTGATG
 >chr1:35856410-35856659 + E=2e-138
GTTCATGCCTGTAATCCCACCGCCTTTGGAATGCTGAGGTGGGAGGACGGCTTGAGGCCAGGAGTTCAGGGGTGGAGTGAGCGGTGACC

ACAGCACAGCAATCCCAGCTGGATGATATAGTGAGACCCTGCCTCTAAAAAATTAAAATAAAATAAAAC|TA|AGGTGTTCAACAAAAA
 >chr1:35855699-35
AAGCTAAATGTTATTGATACAGAATACAAGGAAACTGAGGTTTCACGAAATTAATGACAACTGTTTACACAGTTCCTGATCTGTAAAAG
855863 - E=3e-84
AACAGTAGTTCCTAGTATTGACCAAAGACTCCATTCAGTACCTAAGGTTAATTTTAC
