# Supplementary material for: Chromothripsis during telomere crisis is independent of NHEJ, and consistent with a replicative origin
Source: HighWire-hosted journal article supplement (doi:10.1101/gr.240705.118), 2019-03-14
Supplement: Supplemental_file_1.zip [file contig.2.DB88_length_466_mean_cov_12.2317596567.docx]

**DB88_length_466_mean_cov_12.2317596567**

GCAGCAGATGGCTCACAAAGAATGGGTAGGGAAAGTGTCTATACCATCAGTCTCATGGAAAGGATCCTTGCTTGGTACCCACTCTTCAG
 >chrX:17613233-17613439 - E=2e-112
GATCAAAGAATGAGCTTGCAGGTGAGCTATCTGCACCCAGCAAGGCAGCCTGCATCTGAATGAGAAGAGCCAAAATCCCTACAGAACTT

CTACATATATTCCATGTCAGCAGGAACA|GGGCAGGAACAGGAACAGCCCTGTTCCTGCTGTGATTTCATTCAACAGGAACA|GGGCTC
 >chr1
TCTGTGTATCTAAGAGCTCATGTCTGGGATGAGTGAGTTCTGGTATCTGGGCCTGCACTTCTCACCACTGGCCCTGACTCCTCCCTTAG
4:107219502-107219709 + E=5e-113
CCAACTCCAGGACACAGCCGGCCAGGCCTAGTGTGGTTTGCAGAAGCCACTGCCTAATCAGAATATGGATGATTTTCCTGCACTCTCCT

GTTTACCTTAAACTATGGAGAGA
