# Supplementary material for: Chromothripsis during telomere crisis is independent of NHEJ, and consistent with a replicative origin
Source: HighWire-hosted journal article supplement (doi:10.1101/gr.240705.118), 2019-03-14
Supplement: Supplemental_file_1.zip [file contig.2.DB88_length_706_mean_cov_7.62747875354.docx]

**DB88_length_706_mean_cov_7.62747875354**

ATTACACTAAATGCTGTCCAAGTCAATAGATGGCAGAGACTTGGGGACATTGAACCTGTCAGAGAGGTCACAGGCTCCCCAGTTGTGGG
 >chrX:17699129-17699543 + E=2e-237
CAGTCTTCTTTCCAGTTTCCAGAAATGAGACCCTCAAAGAGTGATCTTTAGTAGCCTCATCTTTGTTTATACTTCACTCAACAAGAAGA

CAGGCAAAATAAAGCAAAAAGAACCTTGGAGAGCTCCAGACTTTCCTCTTGTGAATTTGGACCCTGATCCTGGCCTCCCAATCTTCTTT

TGTTTTCAGCCCAGGAAAGGGAACTAATATTTATTAAGCAGTGACACATGCCAAGGATGTTGTTACTTAATTGGAGCCTGAACCACTGC

ATGAAGGCTCTGTGATTCCCCTTTCATAGAAGACTTGCTCTGGATCACACTGATGCTG|GATCACACT|GATGGACGAAAGAGTTTTAA
 >chrX:17671996-1767
GAAGGCTGGGTGATTTATAATGTCAAATGTCACCGAGGGGTCAGTGGGAGGAGTTCTGCCTGCCAAGGGCAGACCTGGACCCCTAAGGC
2278 - E=1e-153
TTTGGGAAGGCTTGATGGATTGGCTACTGATGGGAGATGTGAAGTGGGTGGGAATACCAGTCAGAGCTTCTCAAAGGTAAAGGGAAGTC

CTTCCCTTAGCCTTGCTTCTCAAAGGACCGGCAGCCCCTGGGGGTTTGGTAGAGATACACCTTCTCAGGCCTTCCCAGACCTGCT
