# Supplementary material for: Chromothripsis during telomere crisis is independent of NHEJ, and consistent with a replicative origin
Source: HighWire-hosted journal article supplement (doi:10.1101/gr.240705.118), 2019-03-14
Supplement: Supplemental_file_1.zip [file contig.2.DB88_length_710_mean_cov_11.7676056338.docx]

**DB88_length_710_mean_cov_11.7676056338**

AAACAATTTTGTTTGTGTGTAGACAAAAACCACTTTTTCATATAAATGTCTAAGCATATTTTTCTCAACTTATTCTACTAAAATTTAAG
 >chr7:142130378-142130692 - E=4e-174 p=4e-02
TTTGGATTTTCACCACTAAGAATAAATGTACCTGAAATACATCTCATGTAAGAAATAAGATACAGACCTAGGAATGGGAGGGAAGGACA

TATATTCAGTGAAGAAACAATAGCTTGTCAAAAAGAGCCCTAAGTGGACACCTGGAGCTGACGGTGGAGAGGTAGGTGGAGGGCAAATG

AGCATGAACTTTGTCAGTCTATTGTCTTGTAGAAGAAAGACAGCCAG|TGTGGCC|AGTGTGGCCACTCTCCATCTCAGTCCCTGGAAG
 >chr7:142116990-142117319 - E=7e
TTGTCCAGAGTTCCCTGAGAATCCCTGCTCTGGGGCAGAATCACCAAGGCTCATCCTCACCAGCTCCCCACAGGCTCCAGCAGGGCTTT
-158
CCTGCCAGGTGTAGGGCACAGGAATGGCTCTGTCTGTCTCTCAGGTAGAGGGAGGCCAAACAGTGATGTTTGTATAAGAGGGACTGGGT

TTCTGTGTCTCCATTAAAGTATTTGACAATATTTTCTTTGTTTTTTTTTTTTTGGTTTATTTTTCACTCTCGCCAATGAGGAGAGACAT

CCTTTGGTATTTATTTTGTTTTTGGC|CATTGCGACGGTTTTTGGGGCTGCGTGAAATTCAGAAATTGTACATTTTTTTTCTTTTCAGC

C
