# Supplementary material for: Chromothripsis during telomere crisis is independent of NHEJ, and consistent with a replicative origin
Source: HighWire-hosted journal article supplement (doi:10.1101/gr.240705.118), 2019-03-14
Supplement: Supplemental_file_1.zip [file contig.2.DB89_length_323_mean_cov_14.3839009288.docx]

**DB89_length_323_mean_cov_14.3839009288**

TCCCAAACTATTGTATTCATTAAGAGATTCCAATATTTCAGTTTCTCCTCACTTTTCTTCTTTTAGTTTAGTTGTTTATGGAACTTTTC
 >chr4:126710084-126710233 - E=2e-78 p=5e-02
ATTTATCTTTTTTTCTTTCATATTATTTTAAATCTTTCTGTCTTCTAGCCTGTTTACG|GT|TCAGCAGGCCTAAAGGACAGTTCATGG
 >chr4:126708977-126709153 +
AAATTTCTCTGGAAAATAAATCAGAGACCCATAGGAAGGAACCACTAGAGGTCATTCAATCTAACTTTTTGGATATCCCTATAAATATA
E=1e-94
CTTAGATTATGCCCACTTTGAAGCACATATTGTCTAATGTAGTTTATAAAGATATTAA
