# Supplementary material for: Chromothripsis during telomere crisis is independent of NHEJ, and consistent with a replicative origin
Source: HighWire-hosted journal article supplement (doi:10.1101/gr.240705.118), 2019-03-14
Supplement: Supplemental_file_1.zip [file contig.2.DB89_length_361_mean_cov_5.81717451524.docx]

**DB89_length_361_mean_cov_5.81717451524**

GGAGGCTGAGGCAGGAGAATGCCGTGAATCCAGGAGGCGGAGCTTGCAGTGAGCTGAGATCACACCACTGTACTCCAGCCTGGGCGACA
 >chr7:65651386-65651503 - E=6e-44 p=0e+00
GAGCAAG|ATTCCGTCTCAAAAAAAAAAA|ACCCAAACCCCATTCTCATACCCGCTCCACAGCCTCTGCTCTGGCCTCTGCAATATAAT
 >chr19:36376898-36377166 - E=7e-143
CACACAAAGAGCCCCCATCCCAGAAAGCCCTTGGACCCATCACAGCCCCCATAGCTAGGAACCTTTCATGGACCACAGACCGAATGTAC

ATGTTAGCACATTCCGGGGCTCCAGCCAATGTCTCCACCCCAAAACTTAAGGCTTAAACCAACACCCTTTTAATTATTTCTTTTCTTTT

TTCTTTT
