# Supplementary material for: Chromothripsis during telomere crisis is independent of NHEJ, and consistent with a replicative origin
Source: HighWire-hosted journal article supplement (doi:10.1101/gr.240705.118), 2019-03-14
Supplement: Supplemental_file_1.zip [file contig.2.DB89_length_476_mean_cov_8.19117647059.docx]

**DB89_length_476_mean_cov_8.19117647059**

AAAATTATGCCATTATTTCAGGGGAAATATCTGAATTATGAAGTCACAGAAAGAAGATTATTTATATAGTTTTCAAGCACAATATAAAA
 >chr5:23359295-23359540 - E=6e-136 p=9e-03
CTGTTTTTTAATGTTGGGATCTATAATTTCATTAATGATGGAGAAAATGGGGCAGCATCACTCTTAATTTGCATTACACAAATGCACTT

ACATACTCTTTTTTTTTTTTCTAAATGGAGACTCTCTCTGTCACCAGGCTGGAGTGCAGTGGC|ATGA|CAAGATGCCCTCTTCTAATG
 >chr5:23112218-23112453
ATATGCAAAATTCTCAGTCAACAAAGAATCCAAGCATCTTTTCTTTCTGATCAAAAAGAAACATGTATGACCTTACTGAACTAATATTT
 - E=7e-130
TACTGCACACTCTGAGTCCTGCCCAAACCCTCTTTTATTTTTCTTGAAGCAACTCGCATTATGTTTAATAATTTTTCTATATTTCATTT

AATTTATTCAAACTCACATGTGTTTAAGGTATA
