# Supplementary material for: Chromothripsis during telomere crisis is independent of NHEJ, and consistent with a replicative origin
Source: HighWire-hosted journal article supplement (doi:10.1101/gr.240705.118), 2019-03-14
Supplement: Supplemental_file_1.zip [file contig.2.DB89_length_499_mean_cov_7.51503006012.docx]

**DB89_length_499_mean_cov_7.51503006012**

TGAATAAACAGTTTCAAGTGATAAATCAGGAATCTAGGTCACATATGTATTAGACATGTATTCTTGTGTATATGGACATTCTAATAACC
 >chrX:8963932-8964099 + E=7e-80 p=1e-02
CATATCAATGTGGCTTTTAACAATTCTTTCCTTTTTAAAAAATTGGATTAATATTTACTCTATAAACATTTATTGAG|A|TCAGAAGGT
 >chr10:83
AGGAGAAGTCATATTATAAGTTAATATTGTTTCAATCCAAAATCTCTTTAATTTTAACATTTCTATGTTAATTTGATTTATGGGTGTTG
930615-83930948 + E=6e-189
TCAGATTGTTTTATGCAGTCTGAGATCATTTGTCTTCATGTGAAGGAGCTGAAGACATTAATATTGATTATGATAATAGATACTCTGGC

TTTATTAGTGTCATTATTTTCTATTTTCTTTCATTTTCTTTTCCTCCCATTTTTGTTTAATTCTCATTTAGTCTCCTGGTGCAATTCAA

TCAATGTATTTGGTATGAAGTATTTCAAAAATAGAAGTCCCATTTTTGCATAAATT
