# Supplementary material for: Chromothripsis during telomere crisis is independent of NHEJ, and consistent with a replicative origin
Source: HighWire-hosted journal article supplement (doi:10.1101/gr.240705.118), 2019-03-14
Supplement: Supplemental_file_1.zip [file contig.2.DB89_length_623_mean_cov_8.42696629213.docx]

**DB89_length_623_mean_cov_8.42696629213**

ATATTAAAATCATAGCCCAACATTTTTCAGGCAGTACCTCTGTATTCCCTTGAACTTAATATGCGTCTTGTCCAAACCTGGGTATTTAT
 >chr10:83930147-83930428 + E=2e-157 p=4e-02
TTTCTCCATGAAAATCCATATGGTTCACCATTCAACACCTGATTCTGAGTCTCAGCTTTTTCATTTATTAGTTGTTTGACCTTGGGCGA

AGTCTCACTAAAGCTTAATTTTCTCATTTTTAAAATGGGGAATAATTGTGAGAATTGAATGAGATGATGTTTATAAAACTTGTGGTATA

TATATATATATAT|A|CTCTGTATACTAGGAAAGGACATTAGTGGAAAACTCTAAGAAGGTTCCTCAAAAAATTAAAAATAGAATCACC
 >chrX:8962292-8962632 + E=7e-181
ATTTAATCCAGTAATGCCTCTTCTGGGTATATATTCAAAAAAACTAAAATCAGTATTCCCAAGAGAATCTTCACTGCCATGTTTATTGA

AGCATTATTATTCATAATCACTAACATATGGAAATAAATGAAATGTCCACAAATGAATAAAGAATACACACACACACACACACACACAA

ATATTATTTAACCATTAAAAATAAAATCCTGCCATTTGTAATAATGTAGATAATCCTGAAAAAAAATTATGTTAAGTAAGACAAATAA|

AAC
