# Supplementary material for: Chromothripsis during telomere crisis is independent of NHEJ, and consistent with a replicative origin
Source: HighWire-hosted journal article supplement (doi:10.1101/gr.240705.118), 2019-03-14
Supplement: Supplemental_file_1.zip [file contig.2.DB89_length_633_mean_cov_6.3981042654.docx]

**DB89_length_633_mean_cov_6.3981042654**

ATCATTTTTATTAATTTTTAGTTTAATTTATTTTCAGCAAGATACGATGATGTGTATGATTTCCAACATTAAAAATTATTTATAAAGAC
 >chr18:63164304-63164584 - E=1e-153
CTTCTATATGGCACAACATATGGTCAACTTTGGTAAATGTCTAGTGCATACTTGAAAAGAAAGTACACTCTGCAGTTTAAGGAGTGCGA

TATCTTCACCATTAATTTTACTGATTGTGACGTCCTAATCTTTATTTTATCTTTACTGATTTTGGTGTCCTTGTTTATGAGTTTTTGAG

ATAGTTCGAATAA|AAAAAA|ATATCCATCAATGAATTTTATATTTTGATGCATTTCAAAGTAAATTGGTTTCAATAAAATGATTCAAA
 >chr18:63162978-63163325 - E=4e-197
TGTGTTCTAAGGTCTTTCATAGTTCACATTGGTTTCCAGCTTACATTACTTCTATGATGCAATATTTCAGAATATCATCCAAATTAATA

GAGTTTACTCAGACATTTGTCTCAGTCTTGGACTCTGACTATTGTCCCACTAACATTGTGAGGCTGCCATAACTGCAGTGCTTAACCTT

TGGCTCTGAGCTTTTCAAGTGCCTGCTCTGAGATGTATCATGCTTCTAAGAGGAAACTGACCTTGAATACTGGGCTCACTCCCTATACC

TCCATCCTACTC
