# Supplementary material for: Chromothripsis during telomere crisis is independent of NHEJ, and consistent with a replicative origin
Source: HighWire-hosted journal article supplement (doi:10.1101/gr.240705.118), 2019-03-14
Supplement: Supplemental_file_1.zip [file contig.2.DB89_length_645_mean_cov_4.74263565891.docx]

**DB89_length_645_mean_cov_4.74263565891**

ATTTATTAGTTATGTTTTTCCAAAGGCAAAGAATGATGATTAGGTATTTTATAATCTCACATTCAACATGGAAATTTACTTAAATTGTA
 >chr4:126712282-126712704 + E=3e-230
TAGCATAACAATTTATGGCTTTAAAATCTTTGGCCAGGTTTGGTGGCTCACACCTGTAATCCCAGAACTTTGGGAGGCCAAGGTGGGCA

GATCACTTGAGGTCAGGAGTTTGAGATCAGACTGGCCAACATGGTGAAACTTAGGCTCTACTAAAAATACAAAAATTAGCCGAGAGTGG

TGGTGGGAGTCTGTAATCCCCAGCTACTTGGGAGGCTGAGGCAGGAGAATCACTTGAACCTGGGAGGCAGAGGCTGCAGTCAGCCGAGA

TTGTACCACTGCACTCCAGCCTGGGCAACAGAGTGAAACTCTGTCTTACAAAAAACAAAAAAAAAA|GAGAAAGAAAAAGAAAG|AGCC
 >ch
AAACATTTGTCTTCTTTGTGAGATCCCTCCCTACAACTCCAGACTTCATTTCTTGGGCCCTCACCAATGATAATTTCTGGAGTCTACAT
r4:126700715-126700921 - E=3e-112
CTGTAGTAGGAGCAGACGTGGGCATCCACATATAGGAGGACGTGCAGTTACTAGAGTTCCTCTAGTCTTTAGTTACTGTTTTATACGTG

ATTTTTGAGATGCCTGCTACCTAG
