# Supplementary material for: Chromothripsis during telomere crisis is independent of NHEJ, and consistent with a replicative origin
Source: HighWire-hosted journal article supplement (doi:10.1101/gr.240705.118), 2019-03-14
Supplement: Supplemental_file_1.zip [file contig.2.DB89_length_668_mean_cov_10.8532934132.docx]

**DB89_length_668_mean_cov_10.8532934132**

AATGTTGATGAGTATATAGAGCTACTAGAATTCACACATATTGTTAGTGGGAGTGTTAAATGATGCAACCATTTTGGAAAACAGCTGGA
 >chr22:28365631-28366086 - E=3e-257
TAGTTTCTTATAAAATTGAACATACACCCACTCTATCGCCCAATCAAATTCTATACCTAAGTATTCACTCAAGAGAAATGAAAAAAGAT

GTCCACAAAGAGACTCATCTAAGAATGTTCATAGTTGCCTTATCCATAGCAGCCACAACTGGAAAAAACAAAATGCCTATTATCAGGTA

AATGGATAAACAAATTTTGGTATAGTCGTACAGTGGAATACTCAACAACAAAAAGGAATGAACTGATATATCCACCAAGATGAGTGAAT

ATAAAACACTGTATGTTGAGCAAAATAAGTAAAAAACAAGAGTTCATACGTTTCTATTTATACAGAGTCCTAGAATAATCGAAACCTAC

TTACGA|TGA|AACTGATGAATTCACTTCAATTCCAACCTAATCAATTCTGAACTAGTGCCTTGAAGTCATTTAAATAGTAACTTCCTT
 >chrX:10604546-10604763 - E=8e-119
TGCACAAAATCTTAAGACCGTGGAGAGTGGAGGTCAAGAGAACACTAGTAAGGTGGCCTCTGACTTCTTGAGCTTTTGACATTCAGCCA

CCAGAGGCTGCTCTGAGACCATTATCCTCTTTTCACTCCGGGTCCAA
