# Supplementary material for: Chromothripsis during telomere crisis is independent of NHEJ, and consistent with a replicative origin
Source: HighWire-hosted journal article supplement (doi:10.1101/gr.240705.118), 2019-03-14
Supplement: Supplemental_file_1.zip [file contig.2.DB90_length_301_mean_cov_4.48504983389.docx]

**DB90_length_301_mean_cov_4.48504983389**

AAAGAATGCTTCTTTCTTAGACTATACACAATGTGGCAAAACTGGGAAATGAAACAAGGAAACTTTCCCACATCCAAGTCACCACTAAA
 >chr3:132278805-132279017 + E=2e-116
ACAGGATCTTTAACAAAAGCCAACAAAGAGATCCTGCTGCAATGCCATATTTCAGTCAATACAGACCCTCTGGAAAGAGACACCTCTTC

CAAATCACATTTTATCCATTTATTTCTAACTT|GT|TTAGCCGGCCCAGCGAGGAAGGAAGCCGAAAGAGCCAGGTTTTTGATGAGGGG
 >chr3:132379101-132379192 + E=2e-43
GAGCGATGTCTGCGACGCACCGGAAGCGGCTCCGAG
