# Supplementary material for: Chromothripsis during telomere crisis is independent of NHEJ, and consistent with a replicative origin
Source: HighWire-hosted journal article supplement (doi:10.1101/gr.240705.118), 2019-03-14
Supplement: Supplemental_file_1.zip [file contig.2.DB90_length_419_mean_cov_7.70883054893.docx]

**DB90_length_419_mean_cov_7.70883054893**

ACACACACCACATACACCATATATACAC|ACAATACATACATACTACTCAAGACATATCATACCACATACACACCACACACAGCATATA
 >chr13:31416763-31416791 - E=3e-05 p=0e+00
TATACACAATACACACACAATGCATACACACAACACAAGACATATCAT|ACCACACACACAATACATACAATACACCACACATACATAC
 >chr8:54506571-54506854 + E=6e-159
ATATAACATGCACAACACACCACCTACAAACCCACACAACACATACACATGCTACACAAAACATACATGTCCACACACACCACCCACAC

AAATATACTCACCACACACACAAACACAGCAATGCCCCACCCACAGTGGCTGCGATGGTTCCTGCATTTCTCTTTAGTCTCTCGCAGCC

CTGCAGCCGGTCCTGAGCGTTACTCAGCTGGGGGATAACAGACCTGATGCGTCCGCCTCCAGCCC
