# Supplementary material for: Chromothripsis during telomere crisis is independent of NHEJ, and consistent with a replicative origin
Source: HighWire-hosted journal article supplement (doi:10.1101/gr.240705.118), 2019-03-14
Supplement: Supplemental_file_1.zip [file contig.2.DB90_length_456_mean_cov_6.90789473684.docx]

**DB90_length_456_mean_cov_6.90789473684**

GTGGTGGCGCACGCCTGTAATCCTAACTACTCAGGTGTCTGAGGCGTGACAATCGCTTGAACCCTAGAAGAGGAGGTGGCAGTGAGGCA
 >chr2:220847597-220847904 - E=2e-170
AAATTCCACACTGCAATCCAGCCTAGGCAACAGAGTGAGACTGTCTAAAACAAAAAATTAAAAAATTTTAAAAAGAATGGCAACAATAG

ATACTGGGGACTAATAGAGTGGGAGTAGGAAGAGGGGCAAGGGCTGAGAAACTAACTACTGGGTACTATGCTCACCACCTGGGTGATGG

GATCGATCATATCAGCATCACACAGTATACCCATGTGAC|A|GGTGCATTATACTTTGGGAGTTGTACTTCTTTAAATAGTCAGCACGG
 >chr2:221136525-221136675 - E=1e-75
TAGAGCAGAAAAAGCACTACAGCAGGCGTCAGATGATTGGGTGCTAATCACCGCTTTGCCACTAACTACCTGATGGCCTCAGAGAGGAA

AAATGCTTGCGTT
