# Supplementary material for: Chromothripsis during telomere crisis is independent of NHEJ, and consistent with a replicative origin
Source: HighWire-hosted journal article supplement (doi:10.1101/gr.240705.118), 2019-03-14
Supplement: Supplemental_file_1.zip [file contig.2.DB90_length_585_mean_cov_15.3846153846.docx]

**DB90_length_585_mean_cov_15.3846153846**

ACTTGTTACCCACATTCATGTAGATAATAGCTCCAGCTTTGGCTAATATGTCCCTCCCTAATAAGGGTGTGAGACTTTCAGGCATAATG
 >chrX:111356514-111356883 + E=2e-210
AGAAAGGCATGTGAAAAGAGCAAAGTCTCCCAATTACAACTGAGGAGGTGGGAGAAATACCTGGTTACAGCTATCCCAGGATTCCTTGG

ATGGTAACGGACTTTGAGGACAGCTGTCCCGGACAGGAGAGTAACACTGAGAAAGCCATGCCAGTGTCCAGGGGGAAGTCAATTTCCTA

GCCCTCAATGGTTAAATGTACCCAGGGCCCAGTGAGGGTGGTGACATGAGCTGGCGCTTGCTCCGGGCACCCTCAGTCCTATTGTTGAA

TCATCTGGTTGT|G|AGCGAATATTGGGGCCAGGCCATAGTGCAGAAAAAAATAAGCTGCTTCTTTTTCAGGGTTTTTGGGTCAAATTG
 >chrX:111358178-111358395 + E=7e-119
GTCCCAATGGCATAGGATGCATTTCAAGGGTGAGCCTGTTGATGCCTGAGTGTTTCCCATCTGAAAGAAAAAACTGCCTGCGGTTCTGA

TTTGTTTTTCCCCCACCACCCAAGAACCCACAACAGTCTTTGGACCCTGCTCA
