# Supplementary material for: Chromothripsis during telomere crisis is independent of NHEJ, and consistent with a replicative origin
Source: HighWire-hosted journal article supplement (doi:10.1101/gr.240705.118), 2019-03-14
Supplement: Supplemental_file_1.zip [file contig.2.DB90_length_644_mean_cov_9.39906832298.docx]

**DB90_length_644_mean_cov_9.39906832298**

CAAAAATGTTTTGAAATCCATGCATAGTTTTTTCATAGTATGCATTTTCATAAACTTTTTCAAGACTGCTCATATATGAAATGTGGGGA
 >chr10:78621341-78621678 - E=5e-191
GAAATACTTAGAAGCAATTAATAGTAGGAGATATTAATCTCTCTTATTCCATGAAAGATTGAGTGAATAAAAATAAGCAAGACTATGAA

AAATTCAGCATTGTTAATAAGATAGATTATATATGTAAGTTTTATACTTGGGTATGTATATATGTTATATGGACATGTGTGTGTATGTA

TATATGTTATATGGACATATATGTGTGTATATATGTGTGTGTTTATATATACATGTATAATTATATATA|T|GCCTCACCTCTAATGAT
 >chr10:78115440-7
GGGAGGCCCTTCTAATTGGGTTTCCAAATCAGCTGTCAAGGGGAACAATACAAGTTCCAAGAAAAGCTTGATCTATAGAGAACTTGGGC
8115748 - E=1e-173
TTCACTTATAGCCCTGAATGTGGGCCAGGTTCAGGCTTTTCTAATGCTACTCCAAATACTCCCTAACCCAATAATTTGGGCCCACATTC

AATGCTAATTCAACGTCCCTTTCTTTCACAATCGGCATGCATGCAACTCTTTACACTTCATACAACTTATGCAGTTAGACATGCCATTT

TTCCACCACACAAAAAATTAGAC
