# Supplementary material for: Chromothripsis during telomere crisis is independent of NHEJ, and consistent with a replicative origin
Source: HighWire-hosted journal article supplement (doi:10.1101/gr.240705.118), 2019-03-14
Supplement: Supplemental_file_1.zip [file contig.2.DB90_length_727_mean_cov_4.1265474553.docx]

**DB90_length_727_mean_cov_4.1265474553**

AAGAGTGTCTCTTTACACGATGTACTGCCTGGAATTTTCAAAGGGGTGACTCAGTTGATATAAAACTGCCCGTCCTACTCTCTTTAATG
 >chr9:120780421-120780822 + E=2e-220
CACCTTTTCTGATTTCTGTGCTATGCCCAGGTGCTAAAATCACTCACCTGGTTTCCTTTGCTCTTGTGAAGGTACTTTTGTGTGTTGAT

TGTTGTTCAAATTGATGTTTCTGAAGGGGGAACAGTTGAAAGTCCTATTCCATCATATTGCTCTTCATCAGTATGTTTTATATTTATGA

CCAATGGTTTTAAAATATTGCAGGCATTTTTTTCATGTGTCTTTTGGCTGCATAAATGTCTTCTTTTGAGGAGTGTCTGTTCATATCCT

TTGCCCACGTGTTGATGGGATTGTTTTCTTCTTGTAAATTTG|TTT|TCATCTTAGATAAAATGTTCATTTAGCCACAGAATCTTTGAA
 >chr9:120783989-120784318 + E=4e-183
GCTCAGAATTAGAATAAAGTCACTACGACCAATCCCTAGTTCCCTGTGAATTCCACAGTTTCTTGCACAATATTTCAGGCCTGTGGTCA

GCCAGTTAAAGAAACTGTAGTCTCTGGCTTGTAGTTAGGAAATAAGAGAAAAGACCAAAAACCTGACCTATAGAGAACTAAGAGAGCTT

AAAACGCCAGAACCAAATAGACTCCTGATTCTAGGCAGGTATTTGATGGGTCAGAGAGAGAGAAATAAATACTGCAGTAATGATGGCTA

CAATCTCAGAAGTGATT
