# Supplementary material for: Chromothripsis during telomere crisis is independent of NHEJ, and consistent with a replicative origin
Source: HighWire-hosted journal article supplement (doi:10.1101/gr.240705.118), 2019-03-14
Supplement: Supplemental_file_1.zip [file contig.2.DB91_length_274_mean_cov_1.79562043796.docx]

**DB91_length_274_mean_cov_1.79562043796**

A|GAAATTAGCCGGGTGTGGTTGCACATGCTTGTTTTCCCAGCTACTCG|TGATGCTGGAGCA|AGAGGATCGCTTGAGTCCAGGAGTT
 >chr2:7750809-7750856 - E=6e-05 >chr12:31788407-31788620
CAAGACCAGCATGGGCAACATGACAAAACCCCTCTCAATAAATAAAATAAAAATAAAAGAATACAAATAAATAACTAAATTAGGTAAAC
 - E=3e-111
TGTTGCACTTAATATTTATCTGAACCAGTGGTGTTTATGTCAAGATGGGGTCAGATTCTGGACTAAATCAAACTCTCAGACAAGAAAAT

GGCCTCTTGC
