# Supplementary material for: Chromothripsis during telomere crisis is independent of NHEJ, and consistent with a replicative origin
Source: HighWire-hosted journal article supplement (doi:10.1101/gr.240705.118), 2019-03-14
Supplement: Supplemental_file_1.zip [file contig.2.DB91_length_323_mean_cov_2.16408668731.docx]

**DB91_length_323_mean_cov_2.16408668731**

TTGAGCATGCAGATGCCAAAGATCTAGCCACTGTACATATT|CCTGGAAGACAGAGCAATAAGCTGTCTCATAAGAGAAAAAAAAAACC
 >chrY:13295270-13295450 + E=4e-62 p=2e-02
ATAATGCCACCTAATATCCAGTTTATACTTAAATTTCCCTAAGTGTCTGAATAATTTTTTTTTTTGAAACATGGTCTCAACTTTGTCAC

CCAGGATGGAGTGCAGTGTTGCGATCTCAGCTCACTGCAAC|AGCTGAAGCCGGCATACAAGAGATTGACCGGCGACTGCAGTCTGGGC

GGGTGCGCTTCCAGGCCGAGGTCGA|GCCATGGCTGGCTAATTTTTTGTATTTTAGTAA >chrUn_gl000211:87351-87384 + E=
