# Supplementary material for: Chromothripsis during telomere crisis is independent of NHEJ, and consistent with a replicative origin
Source: HighWire-hosted journal article supplement (doi:10.1101/gr.240705.118), 2019-03-14
Supplement: Supplemental_file_1.zip [file contig.2.DB91_length_388_mean_cov_4.54381443299.docx]

**DB91_length_388_mean_cov_4.54381443299**

CATCTCCCCCCCTCCCCCCCCTCGTCCCCCCCCCCACCCC|CTGCCCCCCCCCCCCCCCCACGCCCCCCCCCCCCCCCCC|CTTCGCCC
 >chr14:101364088-101364127 - E=6e-03 p=0e+00
CTCCCCCCCTGCCGCC|ACCCCTCTGCCCCCGGTTCCCATCCCCCTTGGGCTGCTTGGTCCACACAGCAGTGTGGGGGCCAGTAGGCCC
 >chr8:144580597-144580882 - E=3e-160
AAGGTGGTGAGTGGGCAGAACACGGGGTGACCCCCTTCAGCCGGGGAGGACAGGGCTGCATGGGGCAGGAGGCTGGTTGGGAGCACTGC

TGCCTACTTGTATGTCCTAGCACAGCTCTGGGGGCATCCTGGAGCCACCACAGCCTCCACGGCCCTTCCTCGCCTCCGTGGCAGGACAG

CAGGCTGGCCAGGCAAGATGACCGGTGAGCGGGCC
