# Supplementary material for: Chromothripsis during telomere crisis is independent of NHEJ, and consistent with a replicative origin
Source: HighWire-hosted journal article supplement (doi:10.1101/gr.240705.118), 2019-03-14
Supplement: Supplemental_file_1.zip [file contig.2.DB91_length_491_mean_cov_4.88798370672.docx]

**DB91_length_491_mean_cov_4.88798370672**

TCTTAATTAAATTAGCCTAATCTAATAAATGCATCATAATTAAGAGGACTGTGCCATTCTTTAGTGTTCAGCACACCAGGCATTAGATG
 >chr4:169574015-169574209 + E=4e-105
ATTTGTCCCACTTTCAGCCGTCAGTTGTCATGCTTGCTAAAAGAAAAGAAAAATGATAGCACCAGTCATCGTAGTCCCTCAAGGAATCA

TCCATCTAGTTCTTGA|TGG|ATTTTTATTGCCTTGGTTTCATATTTCACTGACTTTTAATCTGAATTTTATTTCTTTAATAAATAATT
 >chr4:169520028-169520322 + E=2e-165
TTAAAGATGACCAAAAACATATTCTTCCTATATGTCAACATCAAGGGTCTGTAATTCCTTATTATATTGAAACTTTCTAAAAGGTCTTT

ATAAAATTCTGTTAAAATAACATATCCCAACTCAACTTCTCCAAGCCTGATCCCCAAAATAGCGAATAGCCACTCCAACTCCATGTGGC

AAGTAAGGGGTGTAACAGTGAAGAATTCAGAGTTAAGAGATGGTAGTC
