# Supplementary material for: Chromothripsis during telomere crisis is independent of NHEJ, and consistent with a replicative origin
Source: HighWire-hosted journal article supplement (doi:10.1101/gr.240705.118), 2019-03-14
Supplement: Supplemental_file_1.zip [file contig.2.DB91_length_567_mean_cov_7.93650793651.docx]

**DB91_length_567_mean_cov_7.93650793651**

GAATTCCCACATGTTGTGGGAGGAACCTGGTGGGAGGTAATTGAATCATGGGGCAGGTCTTTCCTATGCTGTTCTCATGATAGTGAGTA
 >chr7:115646839-115647140 + E=2e-169
AGTCTCATGAGATCTGATGGTATCATAAGGGAGAGTTTCCCTGCACAATCTCTCTTCTCTTGTCTGCCACCATGTGAGATGTGTCTTTC

ACCTTCCACCATGATTGTGAGGCCTCCCCAGCCATGCGGAACTGTAAGTCGATTAAACCTCTTTCTTTTGTAAATTTCCCAGTGTTGGG

TGTGTAATTACCAGCAGCATGAGAACGGGC|CAAT|GGCATCAATGTCATCAAACCCTCCACTGAGTTCTAAGTGTCTTTTTATAAATC
 >chr7:115662011-115662281 - E=8e-151
TCCAAAAATATGGTGAGCCCATTCCCTTATCTCTCCCTTGTTAGAGGACACATGTCTCAGACCTCTAACCAGGACATGTCAAGAGGTGG

GCACGCGGGTACTTCCACAGTGCTTTTCTCCTGGCCACCCCTTCCCCTTGTGCCTTTCATAGCTCTCAGGCAGGGCCGATAAGCCTGTT

CTCCCCAGTGCTGAATCTGAGGACCAACTCTGGGG
