# Supplementary material for: Chromothripsis during telomere crisis is independent of NHEJ, and consistent with a replicative origin
Source: HighWire-hosted journal article supplement (doi:10.1101/gr.240705.118), 2019-03-14
Supplement: Supplemental_file_1.zip [file contig.2.DB91_length_606_mean_cov_12.6237623762.docx]

**DB91_length_606_mean_cov_12.6237623762**

GGTCAGGGCTGCAAATGGGAACAAAGTAAAGCTTTTGGCAGTTTATTCTGTCAAAAATATTGCAAATGCTGTTGTAAATTAAAAAGCTC
 >chr5:77427893-77428223 - E=7e-184 p=5e-02
AACTTTGAAGATAAAACTGTTTTTGATGAAAGGACGTTGTCATGGTAAAAATCAATGTTCTTATTTAATTAAGAAAACTATGGAAGAGA

AATGTTTTAGGAATTGGTTGTTGTGCATGCGAACAAACTGCTTATTCAGCCAGTTGAAATAAAACCGTAGTTGTCACATTTACTGATAT

TAGTATACACAGTTTGACCGAACTATAAAATTCTTGTGATGAAACTGATGTTGAAAAACCA|TT|TATTTTAGTTGCAGATTTAAAATC
 >chr5:77426389-77426667 -
TCAGCACTCAAATGGACTTTAGAGTTAACCAAGTTGTAAATTCTAACTCCACATTTGAGAAAACTAATGATTAAGTGGATTTCCCAGGT
 E=1e-155
TTTTCCAGCAAATTAATTACATGGTTTAGTGTACCACATTTTCTTTTAAGTTGGTTTTGAATTGTATTCCTCATTTGGTGAATACTTTG

CAAATTGTCTTAAAAAATGAATCATAGAAATTTTCTTACCTGTACTTGAACCAGCATGGTCTAGCAATTAGTGA
