# Supplementary material for: Chromothripsis during telomere crisis is independent of NHEJ, and consistent with a replicative origin
Source: HighWire-hosted journal article supplement (doi:10.1101/gr.240705.118), 2019-03-14
Supplement: Supplemental_file_1.zip [file contig.2.DB91_length_637_mean_cov_7.53532182104.docx]

**DB91_length_637_mean_cov_7.53532182104**

GGGCATTGCCACTTCTAAATCTGCAAGAGAACCAGAGGTTCGCATAACGTCATCAACAAGATCATGACATATGATGAGGCTATGCATAT
 >chr7:122331595-122331943 + E=1e-197
AGTCCTGCAGTGACACTATGAAAGTCCATTGTCACCCTCCCATGAAGGCAGACTGTTCCTGGCTCTCTGGAGCAATGTTGATTGAGAGG

AATGCATTGGTCAGGTCCACCACACAGTGGCACCATCCCAGTTCTATTGTCAAGCAGTCCAGCAAGTCCGTGACAGACAGCACAGCTGT

CAAGCTGTGCAAAACATCCACCCCCAGAATGTCTCCAGGCATGGGAGAGATGTGCACAGTGGACAAGCAGACAGCCAA|GTG|AGAGCT
 >chr7:12
GTGGATGGGAAAGCTGCTGAATAAAACTACATTTCACCTGCTTACGGCCCCGAGTGTTCTTTCAGCTATCTGTCCATCCACCCACTCCC
2332586-122332878 - E=6e-161
CTCGGACCTCAGCAGGGGCTGGACCCTGGGCATGACGTTTGGTGTACTCATGAACCTGACAGTTGGCATAGTTGGCCAGATGAGGTGAG

TGGGTCTTCAGTTCTGNGGGGTCTTGGGTCGGCTATGTGGCCGCAGCATGGGCTGTGGTACCCAGTGGCAGCGGTGCTGCCTGGGTGGG

CCCCAGTGGAAACGTG
