# Supplementary material for: Chromothripsis during telomere crisis is independent of NHEJ, and consistent with a replicative origin
Source: HighWire-hosted journal article supplement (doi:10.1101/gr.240705.118), 2019-03-14
Supplement: Supplemental_file_1.zip [file contig.2.DB91_length_670_mean_cov_10.9014925373.docx]

**DB91_length_670_mean_cov_10.9014925373**

TACAATAAATAATCTCCCCTTGTTTGCCTCCATTTGCCCAAAGCCCCCTTCACCCCTTCACGCAGTTAACCACTGTTCCTAGTTTCTTT
 >chr16:68710842-68711178 + E=2e-187
CCTTCCAGAGTTTATATATAGTCTATACTTACATGTGTTACATATTTATTTATATTGTACATGTTTTTACATGTTACCTATTTCGTATA

TATACATATATAAAAACAGATTCTTTTCCTTATGCAAAAGCTAAGATGCTGTTCACATGTCTGCACCTTTCTTTTTCTACTTAACAGTG

TATCAGCACAGCACAATGTCTACCCTCTTTCCACAGATAGCCACTATTAGTTTTTTTCTGTATTCTCC|C|CAGGGACCCCCATCCAAA
 >chr16:68712217-68
GGCCTGCATGAGATTTCTTGCTACTGAATGTGGGGGCTGAGACAGAAAAACCTCTCCTGTTCAGTGAGCAGATTCTCCTATGGCAGTGC
712552 + E=8e-187
CCCTCTTCACAGAGGACTCTTTGTCACAGTCATGGGATATTTGTTACTTTGTCAGCTGCCATTTTCTTTTCCCTCCAGCTCAAGTCTAA

TAAAGATAGAGACACCAAGATTTTCTACAGCATCACGGGGCCGGGGGCAGACAGCCCCCCTGAGGGTGTCTTCGCTGTAGAGAAGGAGA

CAGGCTGGTTGTTGTTTAATAAGCCACTGGACCGGGAGGAGATTGCCAA
