# Supplementary material for: Chromothripsis during telomere crisis is independent of NHEJ, and consistent with a replicative origin
Source: HighWire-hosted journal article supplement (doi:10.1101/gr.240705.118), 2019-03-14
Supplement: Supplemental_file_1.zip [file contig.2.DB91_length_717_mean_cov_5.92887029289.docx]

**DB91_length_717_mean_cov_5.92887029289**

CCTATGTTGCCCAGGCTGCTCTCAAACTGCTGACCTCAGGTGATCCACCTGCCTTGGCCTCCTAAGGCCCTGGGGTTACAGGCATGAGC
 >chr17:80371215-80371566 - E=2e-196
CACTGCGCCTGGCCTCTAATTTTTATTATTATTGTTTTTTAACTCATGAATTACTTGGAAATTTAAAAGATTTGGAAATGCGTGGGATT

TTTGGTCCCTTTTCACAACGTTGTGGGTATTTCTCCTGACCCACGCTCGTGTGCACAAATTCTCATCACCAGTTTCTGTCTCCTTCACC

CACCGGCTATGGAAAGGGGCGTCAGAACCTCCACTGAGCATGGACCCAGCAGCGTCTGTGCTTTGGTTGCCACGTGTGTCATGG|TGAT

GCC|CAGGACCAGCCTGGGCAACATGGCAAAACCCTGTCTCTACAAACAATACAAAAATTAGGCAGGTGTGGTAGCACGCGTCTGTAGT
 >chr17:80423303-80423662 - E=3e-204
CCCAGCTGCTCTGGAGGCTACAGGGAGCCTCCAGAGGTGGGAGGATCACCAGAGTCTCCCCACTGAGACTCTCTCCACTGCACTCCAGC

CTGGGTGAGGCCCTGTCTCACAAAGAAAAATATTGTGATCTAATTGCTGCTGGATGACTTGTCCAGAAGCCATGGGGGTGAATGGCAAA

CGCTGAGAAGGCTCCTTGGCTGTCCCCTATGCCACCCACTTGTGCCAGTCAGTGTTTCTTGAGGCCCCTACCTTGCTCTAGCACACTAC

CTACTGT
