# Supplementary material for: Chromothripsis during telomere crisis is independent of NHEJ, and consistent with a replicative origin
Source: HighWire-hosted journal article supplement (doi:10.1101/gr.240705.118), 2019-03-14
Supplement: Supplemental_file_1.zip [file contig.2.DB91_length_817_mean_cov_33.3439412485.docx]

**DB91_length_817_mean_cov_33.3439412485**

TGGAAGATAGTCAACAAGCCAACTAATATAAACAGCTTCCTAAGCAGGGTGATATATGCATTGAGAAAGACCACAGAAGTCAGATGGGT
 >chr7:115063388-115063824 - E=2e-247
GCTGGTCAGACCTCAACCTTCCCAGTTCATCTGCTATAACTATTAAATTTTTTAACTGAGCCATAGGCTGTGTCTGAGTATTTACTTGT

TTTAGATTATTTTATTCAACCCCAAATAGAAGTTTAAATATGGTCTCATGATCCATGTAACAATATTTATATAAAAACTGGGGAGTTAG

ATAAAACCACTGAGTATATTTTGACTGCACAATTTTAATAAAATCTCATGTTTCAAAATAGAGAGTTTTTTTTTGTTGTTTGATGAACA

CCAGACATTAGCGCACTGTTCATATGCCCTTCTTTGAAAACTAGCTCATTGGAGAGGAGATTGACCATTTACGATCTCTC|GTAAC|AG
 >
TAGACTTAAGAGATAAAAATAAATTTTACTTGCTTAGATGAAAAATATGTTAAGAAAAATTTATAGATGATCTAATAACATGTAGCTTT
chr7:113775575-113775951 + E=2e-214
TTGGTAAATATAAATTGAGACTAGCTTTGAAGTTTAAAATATATAAAGCAGTAAGTTCAGTGACCCAAGTAGTGTTATGCATTAGCTCA

AAGAGAAATCTATGATGTATTAAATCTGTTTCTGATTTTGAAAAATTTGTAGTTACAAAATCTAATTTACTTAACCCATAAAATAAAGG

CTGTGTTCATGGATTTGCTGTGCCATTCCCCATGTAATATTTGTAAAGCAAATGTGAATTTCCTTCCTAGTTCTCACCCTGAAGGAGAT

AATTCTGATAATTAGAGA
