# Supplementary material for: Chromothripsis during telomere crisis is independent of NHEJ, and consistent with a replicative origin
Source: HighWire-hosted journal article supplement (doi:10.1101/gr.240705.118), 2019-03-14
Supplement: Supplemental_file_1.zip [file contig.2.DB91_length_854_mean_cov_9.01053864169.docx]

**DB91_length_854_mean_cov_9.01053864169**

TGTGTTGCAAACCATAAGAGGATGTGCAAAAACAGTAGCTCCAAAGTGGAAAACAAAAGTAAAAATAATTCACATATTTTTTGCAGAAT
 >chr7:115552795-115553107 - E=9e-176 p=0e+00
TCTGATTCTCTTTCTTCTAACTTTCTTTCTTCCCCAGTGATTTGCTCTCAAAAGAGAAACATGAAAGTCAACAGTAAGCATATAAATAT

TAATAATTAAGACAGATGTCTGCAACTCACCTAAAATAAGAATGAAATTCTACTTGCAGAGTTCTTTTCTTTCACACACATGTGTGTGT

GTCTGTGTGTGTGTGTGAATGAAGCCCTCAAATATGGCACAATGT|TTAATAGG|TTAATTTCCTAACCTAAAACAAGCGCAAGAGATA
 >chr7:115579371-115579905 + E=3e-
AAAATCTAAATGAAGCATCATAGTTATAAGTGCTTATAATAAATGCTAACAGTGCAACCAAAGATCATAGGACACTCTAAGTGTTTATA
288
GAAATAGAACCTTACGTTCCTCTCAGAACTGAAAATAATAAGAAATAGTTTGTTGTAATAATTATTTTGTCAATTGGCAATTCAATTTT

CAATATTTTATCCATTTGGAGAAAAACCAAATCAACAACTAATTGATTTCTGTCCAATACTGATGAAAAGTTTTAAGTACCTGAAAACT

GTCCTTGCAGGGGGACATTTTATATTTTATTTATTAAGATTGATGGTCGGAAATCTCTTCTTCATAAGAGAAGAGAATTGGGAATGTGA

TTCTGATGCAGTCAGAAGCATGAAGAAAACAAAAGAACATATACTACCTGAATGATGTGCATATGTGTATGTGTATGTTTGTGTGAAGG

GATACAATTCTGGTCCATATTCCTGAGGAAAATATTCAATATGTTCCTTTTCCTG
