# Supplementary material for: Chromothripsis during telomere crisis is independent of NHEJ, and consistent with a replicative origin
Source: HighWire-hosted journal article supplement (doi:10.1101/gr.240705.118), 2019-03-14
Supplement: Supplemental_file_1.zip [file contig.2.DB92_length_216_mean_cov_5.55555555556.docx]

**DB92_length_216_mean_cov_5.55555555556**

TTTTGTTTCTATATGAATTA|ACATTCCCAGATAAAACCTGAGAAAATTTATT|AGACA|CTAGAGCTAGTGTGTCTGGTGACTGACAA
 >chr14:104955911-104955943 + E=5e-02 >chr3:60922334-60922478 + E
TTTTCTAAAATTAACTGTTGTGTTAATAGCATTTAGATTTGTAAATTGAACTCCCCTTGCATAAACATTTAAACATTCAAAATAAAATC
=1e-66
TGTAAACTTTGGTAGCATGAACTCAA|GAGGATTCAGTCTTG
