# Supplementary material for: Chromothripsis during telomere crisis is independent of NHEJ, and consistent with a replicative origin
Source: HighWire-hosted journal article supplement (doi:10.1101/gr.240705.118), 2019-03-14
Supplement: Supplemental_file_1.zip [file contig.2.DB92_length_336_mean_cov_5.80357142857.docx]

**DB92_length_336_mean_cov_5.80357142857**

AGGTAGCTTGAAATTAGCCATAGTGGGAATATTTATATCATGGAAATTGACAAATGCTGAAAATCAGGGCTTATTTTCAGAGTTAGCTT
 >chr8:69394843-69395017 - E=2e-90
ACTGGCATGCCACTGAGTATAAAGAGTAATGTTAAAGAAAATACCTGTGTAAGTAAAACTTTTATCAATAAATGGGTGATCA|ACA|TT
 >chr
AGCATCTCTACTCCAACAGTTCTTTGATCCTGTGGGGCCTCCAATCTGTTGACTTACAGGATTTATGTACAATCCGTCATCCTCCTGTA
3:60931722-60931887 - E=6e-85
TCCTCACTTTCCTCCTTGCTCAGCTCAGATGCTATGGTTCATCTCTTCTTTACATGCACACTGAACTCCTT
