# Supplementary material for: Chromothripsis during telomere crisis is independent of NHEJ, and consistent with a replicative origin
Source: HighWire-hosted journal article supplement (doi:10.1101/gr.240705.118), 2019-03-14
Supplement: Supplemental_file_1.zip [file contig.2.DB92_length_382_mean_cov_7.06806282723.docx]

**DB92_length_382_mean_cov_7.06806282723**

CAGAGGCATCTGTGGCTGGTATCTGGAACTTTGTGACTCTAAACCAAACTCTCCCCCATCTTTTTATCTCCAACTTTTCCGAAAGGGTT
 >chrX:11351885-11352165 - E=3e-157
TACATGTGTGAGAAACTCATAGCACCAAAAAACTTGTCAATTATGCCACTGCAATATTTCAGAAGCTTTAACTGAAGCATCTTACGGTG

TCAGGGGTTCTTCATGAGAAATAGCACACATTAGAGGCTTTGAGAGAAGACCTAGTTCTGTCATTAACAGTCAGCCTCAAGTTTGTCCT

CCCATGATGG|AGC|TTTTAATCAATTGGCATGGACCAATTCTAATCAATTGAGTCAATATTTATTAAGCACACTCTAGGGCAAGGCAC
 >chrX:11319774-11319879 + E=1e-51
TATTCCATGTGCTGGTGAAAAGAGCAAG
