# Supplementary material for: Chromothripsis during telomere crisis is independent of NHEJ, and consistent with a replicative origin
Source: HighWire-hosted journal article supplement (doi:10.1101/gr.240705.118), 2019-03-14
Supplement: Supplemental_file_1.zip [file contig.2.DB92_length_442_mean_cov_7.29411764706.docx]

**DB92_length_442_mean_cov_7.29411764706**

CTGCCTTCCCACGTAGCACCTTCCCTGGGGCTCCGGGGTGATGCAGGGGATGGAGGGATGGATAGGGAATCAACCAACAAACACGACAC
 >chr1:17687148-17687367 + E=3e-120
CCTCAAGTCACCTTATGCACCATAACAGGGACACACGTGGGGGCACCACCTCAGACTGGAGGGTCCGGGAAGGCCTCTGTGAGGAGGTG

GGGCTGGCACTGCCTAGGCTGAGTGGGATTCACCTTCTGG|A|CCATGTTGGTCAGGCTGGTCTCGAACTCCTGACCTAAGGTGATCCA
 >chr1:17807760-17807984 + E=2e-123
CCCGGCTTGGCCTCCCAAAGTGCTAGGATTACAGGCGTGAGCCACCGTGCCTGGCCACCTTTGTAAATTTACATCTTGCTTTTTGTCAA

CTAGGGGAAGGGCAGAGAGCTTTTCTTGTATCTGCTTCTTCTTAATTGGCTTCAGCTCAACATGATCCTTATGCCAAAGTTGCATGTT
