# Supplementary material for: Chromothripsis during telomere crisis is independent of NHEJ, and consistent with a replicative origin
Source: HighWire-hosted journal article supplement (doi:10.1101/gr.240705.118), 2019-03-14
Supplement: Supplemental_file_1.zip [file contig.2.DB92_length_445_mean_cov_10.1123595506.docx]

**DB92_length_445_mean_cov_10.1123595506**

AACATTTTAGTTTAGTCTTATTTTAGAGAGGCTCACTTCTAAGGATTTTTTTAATTCAACATGGTTAAAATGTAGACAAATTTAATTTA
 >chrX:12357240-12357381 + E=3e-73
TTGAACCCCAAATCATGTTTTTTGAATGTTCCAAGGCATTTTTCTCATATCA|TCTCATATC|TTGATAACCCTAGTTGGCCTACTAAA
 >chrX:12358326-12358621 -
GGACAAATTGCCTACTTTGACCTCCTTCCCAACTAACTAATCAGTTTCCCCCAAAATAGGAACCAACATTCACTCTTCCTAGGCTGGTT
 E=4e-163
TTTCTCTCTCTTCTCTCATATAAAGCCAGTTTTTCTCTTCTTTATTCTTTGACAATACTCCATAGACCATTTTACACATAACTAAATGT

GCATGCAAATGATTAAACATGTCTAAAAAATGCTAAGTATTGAAACGTTGTTTTCACTTCCACTGGAAAAACTGACATTTATGCAGTGG

TT
