# Supplementary material for: Chromothripsis during telomere crisis is independent of NHEJ, and consistent with a replicative origin
Source: HighWire-hosted journal article supplement (doi:10.1101/gr.240705.118), 2019-03-14
Supplement: Supplemental_file_1.zip [file contig.2.DB92_length_504_mean_cov_7.10714285714.docx]

**DB92_length_504_mean_cov_7.10714285714**

GGGCTCAAGCAATCCTCCCATCTCAGCCCCTAGAGTAGCTGGGACTACAGGTGCACGCCAACATGCCCAGCTAATTTTTTTGGATTTCT
 >chr11:111915439-111915683 - E=3e-135 p=4e-02
AGTAGAGACGGAAATTAGCCACGTTGCCCTGGCTGGTCTCAAATGCCTGGGCTCAAGTGATCCACCCACCTTGGCTTCCCAAAGTGCTG

GGGTTACAAGCATGAGCCACCATGTCCAGTCTAAAAACTAAGCTTTATAGAATACCTATTTCTG|TC|ACAGGTTGGGTGCAGTGGCTC
 >chr11:112033110-11203
ACTCCTGTAATCCCAACACTTTGGAAGGCCAAGGCAGGTGGATTGCTTCAGCTCAGGAGTTCAAGACCAGCCTGGGCAACATGGCAAAA
3372 - E=4e-143
ACCCTGTCTCTCCAAAACATACAAAAATTAGCCAGATGTGGTAGTATGTGCCTGTAGTCCCAACTACTCAAAAGGCTAAGGCAAGAGGA

TCACTTGAGCCCAGGAGGTCAAGGCTACAGTGAGCCATGTTTACTGTGTCACTGCACTCCA
