# Supplementary material for: Chromothripsis during telomere crisis is independent of NHEJ, and consistent with a replicative origin
Source: HighWire-hosted journal article supplement (doi:10.1101/gr.240705.118), 2019-03-14
Supplement: Supplemental_file_1.zip [file contig.2.DB92_length_545_mean_cov_7.70642201835.docx]

**DB92_length_545_mean_cov_7.70642201835**

AAGAATATACCTAACCAAGGAGGTGAAAGATCTCTACAAGGAAAATTGCAAAACACTGCTGAAAGAAATCACTGAAGACACAAACAAAT
 >chrX:97699068-97699380 + E=2e-168 p=4e-02
GGAAATACATCCCATGCTCATGGATGGGTAGAATCAATATTGTGAAAATGACCATACTGCCAAAAGCAATCTACAAATTCAATGCAATT

TCCATAAAAATACCACCATTATTCTTCACAGAACTAGAAAAAAAATCCTAAAATTCATACAGAATCAAAAAGAGCCCACATAGCCAAAG

CAAGACTAAGCAAAAAGAACACATCTGGAGGCATCACATTCCTT|TTGCAAATCAAAACCACAATTAGATACCACCTTAAGAATGACCA
 >chrX:97700068-97700303 + E=6e-125
TAATTTAAAAATAAAAAAAAAAAACAGATGTTGGCATGGATGTTGTGAAAAGGTAACACTTTTACACTGCTGGTAGGAATGTAAGCTAG

TACAATCACTGTGGAAAACAATATGGAGATTCCTTAAAGGACTAAAAGTAGAACTACCAGCAATCCCACTATGGGGTATCTATCCAGAG

AAAAAGTCATCG
