# Supplementary material for: Chromothripsis during telomere crisis is independent of NHEJ, and consistent with a replicative origin
Source: HighWire-hosted journal article supplement (doi:10.1101/gr.240705.118), 2019-03-14
Supplement: Supplemental_file_1.zip [file contig.2.DB92_length_614_mean_cov_6.69706840391.docx]

**DB92_length_614_mean_cov_6.69706840391**

CATTGAATAAGTAATTATGAGTGATGATAAATGTCACAGAAGGGTAATTCAGAGTGCTACAGAAGTGTATGAGGATGGGACCGAACATG
 >chr2:136497541-136497923 - E=3e-218
GGCTAGTGGAGTCAGAAAGGGCCTTCATGAGGAAATGACGTGTCGGGGAACTCTAGGTAGGTGAAGGAGAAGGCTATTCCACATGAGGC

TCTGAAGCAAGCAAACACAGTGCACTTGCAGAACTAAAAAATGCCCAGTGTGGCTATAACATAGAAAGAGGAGTGTGGTACAAGTGAGG

CTGGAAAGCTAGGCAAGGATCAGATGATACAGAGTCTTGAAAATCATGTTAAAAATTTTAAGACATTTTTCTAAGGATTACAGGGAGCC

ATTGAAAAATTTTAAACAGAAGAGTT|T|AATATGTTATATTTAATAAATTATATTAATATGGTTTTTAAGAAATGTTTGCTAAAAGTC
 >chr2:136679490-136679721 - E=3e-118
AAGCACAGGCACATAATCATGTGGCAAATTCTTTTTTGAAGCTAATTGTAAGTGAAAAGCCAGCATTACTTTATTTAACACTTACCAAG

TTATTTTATATATGTTTTTTGATACCTTAATAAAAATTAAATACTTTCTAATAGATAAACTGGCAAGATCATTAAGGGTCTT
