# Supplementary material for: Chromothripsis during telomere crisis is independent of NHEJ, and consistent with a replicative origin
Source: HighWire-hosted journal article supplement (doi:10.1101/gr.240705.118), 2019-03-14
Supplement: Supplemental_file_1.zip [file contig.2.DB92_length_687_mean_cov_5.02183406114.docx]

**DB92_length_687_mean_cov_5.02183406114**

CTTGAAATATAAGGGGGCAAGTTTAGAGAGATCAGATCCCAGGAAAGATAGAGCTTTTAAACTCTTCATTTCTCCTAAGAAAAGCACCA
 >chrX:97700924-97701181 - E=7e-143
TTCCCTACTAATCCTAATAAAGGGAGTTTGGAGTAATGGTGAAAAGTAGGGAACATTGATGCCAGACTGACTGGATTCAAATCGTGTTT

TTGACACTTACCGTATGTGTGTCTTTGGACAAAATACTTAAATTTCCTCTGCCTTAGTTTCTCTATCTTGAAATGGTGA|AATTTATTC
 >chrX:1
ATAAATAAAATAATTGCTTATAGGAAAAATATTTCAATTGAAATTTCATTTTCCTCAAAACATTTACCAATTTTTAAGCTGTGTAAGTG
1309215-11309645 + E=5e-244
GGGCCTAAATTAGTGGAAGAGATTTCAAACAGAGATCCATATTTTAATGTCCTATGATTCAGGATATGCAGTAGGGGAAAATCAATTAT

TTCTATGGAATCGGCCATCAAAGCTTGTTCAACTGTCCACGGTGAATTAGCGGTAACTCACTATCCAGTGGTCCAGAGGAATTAATGCC

ACATTAAGGCAGCATCCTGTTGATCATTATGGCCAAATATATCATCCTCTCATTCTTAGAAGGTGAGAAAAAGTATAAGATCAATCTTT

CTAAAACTACAAGGCTACTAGTAATTCATCATTGACTTCATTAGTAGAGATTACCCACAACTTTG
