# Supplementary material for: Chromothripsis during telomere crisis is independent of NHEJ, and consistent with a replicative origin
Source: HighWire-hosted journal article supplement (doi:10.1101/gr.240705.118), 2019-03-14
Supplement: Supplemental_file_1.zip [file contig.2.DB92_length_733_mean_cov_6.95770804911.docx]

**DB92_length_733_mean_cov_6.95770804911**

CCTGAACCCAGGAGGTGGAGGTTGCAGTGAGCCGAGATCACGCCACTGCACTCCAGCCTGCCAACAGAGTGAGAATCCGTCTGAAAAAA
 >chr11:9892436-9892769 + E=7e-179
AAAAAAGTAACTCAAGATGGATTACAGACTAAAATGTAAAATGCAAAACTATCAAAAACCCTAGGAGAAAATCTAGGCAATACTTTTCA

GGATATAGGCATGAGCAAAGATTTCATAATGAAAGCACCAAAAGCAATTGCAACAAAAGCAAAACTGACAAATGGGATCTAATTAAACT

AAAGAGCTTCTGCACAGCAAAAGAAACTATCATCAGAGTGAACAGAAAACCTACAGAATGG|TTTTACA|CTGTTAATCACTTTGGGAG
 >chr11:9758499-975
GACAGGGTGGGAGGATCACTTGAGGCCAGGAATTTGAGACCAGCCTGGGCAACATAGCGAGACCTCATAGCAGTCAACCAACAAACCAA
8897 + E=1e-227
CAACACTTTTAGCTGGTCCGTGTGTTAGTGTGTTGTTCTCATGGAGCTTCTGGCCTCCTCTTAATTCTCAGCCACTCTTGCCTGGAATA

AAGTTTCTGCAACATGCAGCTGGGGACAAAGAGAAATTCTGGCAGCCAGCCTGCCCCTCCCAGGAAGGTATCATAGCCCTAGGCTTGAG

CTGAGGGGAGGGGAACCCTTGTTTGGGGTTCCATCTGCCAGGAGAAGAGCTTTCTTCTCACTGACACTGTGGGGGTGGGGAGGGAGTGC

ATCATATGCCACAGACCCTCACG
