# Supplementary material for: Chromothripsis during telomere crisis is independent of NHEJ, and consistent with a replicative origin
Source: HighWire-hosted journal article supplement (doi:10.1101/gr.240705.118), 2019-03-14
Supplement: Supplemental_file_1.zip [file contig.2.DB93_length_177_mean_cov_19.3050847458.docx]

**DB93_length_177_mean_cov_19.3050847458**

CCCCTTTAGGCAGAGCTTAGACCAGAGTTAGG|TCACCTGGGTGATCAGTGCAGGGATATGTCACAA|AGCACCCTGTAGGCAGATCCT
 >chrY:13475774-13475840 + E=1e-19 p=0e+00 >chr18:108358-108503 - E=2e-61
AGAGAAGAGTTATATCACCTGGGTGATCAGTGCAGAGGTAGGTCACAATCCCCCTGTAGGCAGAGCCTATACAAGAGTTATATCACCTG

G
