# Supplementary material for: Chromothripsis during telomere crisis is independent of NHEJ, and consistent with a replicative origin
Source: HighWire-hosted journal article supplement (doi:10.1101/gr.240705.118), 2019-03-14
Supplement: Supplemental_file_1.zip [file contig.2.DB93_length_265_mean_cov_6.09433962264.docx]

**DB93_length_265_mean_cov_6.09433962264**

AGATTTGGATAATAATAGTATAACTGTTAAACAGAGATGCAAAAGGAAAATAGAAGCAACTGGAGTGATACAATCTTGTGCCAAAGAGG
 >chr8:17867165-17867272 + E=4e-53
TAAATAACGTTCATTTT|G|GTTCAAGTACTTAGTAAAGGCTAGTGCTCAAATATTTCCGCTTGTTCTCTTGCACCTTTACCACTGCCA
 >chr17:52470131-52470290 + E=1e-84
TGAGAACACGACCAGGATGGCCTGATGAATATGAAAAATGCATGGGTCAGTGGCCCCTGTTGCTCCAGCGAACAGCCAGCCAAATGCCA
