# Supplementary material for: Chromothripsis during telomere crisis is independent of NHEJ, and consistent with a replicative origin
Source: HighWire-hosted journal article supplement (doi:10.1101/gr.240705.118), 2019-03-14
Supplement: Supplemental_file_1.zip [file contig.2.DB93_length_268_mean_cov_4.4776119403.docx]

**DB93_length_268_mean_cov_4.4776119403**

GGGACTTGCCATCTTGTTGCATGTATACAGAATACATGTATACACACATGCACATATATGTATATATAAGTAGATAATTTAGCATAGGA
 >chr17:50819044-50819213 + E=1e-87
ATTGATTGGCTGAGGTGATTGTGAAAGCCAAGAGTGCCACAAATTGCCATTTGTGAGTTAGAGAACTCAGAAAAGC|CAGT|ATTTCTG
 >chr17:508
GAGAGTATTAAGTATGATAATCACTCTGCTCCTATATTCTCCTTTAATGTTTGCAATACCCAAAGGAAAATTAATGCAAGAGAAGAAAT
15715-50815818 - E=1e-44
ATA
