# Supplementary material for: Chromothripsis during telomere crisis is independent of NHEJ, and consistent with a replicative origin
Source: HighWire-hosted journal article supplement (doi:10.1101/gr.240705.118), 2019-03-14
Supplement: Supplemental_file_1.zip [file contig.2.DB93_length_284_mean_cov_10.161971831.docx]

**DB93_length_284_mean_cov_10.161971831**

ACCATTCTTTGGAGTGCCACATTCTGCTGTGGTTTTGCTCCTATAATAGGTCTTTTGCTCTACACCTTTGCAGAGATGCATACAAATGT
 >chr3:114888417-114888586 + E=1e-90
TTCTGCAAAGTACCATAACATCTTAAAGAATGCAGTGTTTGGCCCTGAGGCCATGTGTCTTGAAATTTTTTGTGTGTA|TT|CCCCAGC
 >chr3:11
TGTGAAATGGGGTGATTAAGGTAGATGTGAGAATTAAATGCAATGATACAGGTACACTTCGCACTGTTCTGAGCACATAGTAAGAGCTC
5434815-115434932 + E=4e-59
GAAAATGTTAACTATAGCT
