# Supplementary material for: Chromothripsis during telomere crisis is independent of NHEJ, and consistent with a replicative origin
Source: HighWire-hosted journal article supplement (doi:10.1101/gr.240705.118), 2019-03-14
Supplement: Supplemental_file_1.zip [file contig.2.DB93_length_322_mean_cov_5.56832298137.docx]

**DB93_length_322_mean_cov_5.56832298137**

ATGATGTGGAATATCACTCTCTTAAAAAATGCAAACAATTTATTTAATAGTCATAGTGCTAAAGATGGCATGCCCTCCAAATGAGCAAT
 >chr5:21514989-21515267 + E=3e-141
TGCACTCTTTGTTATGCATTTATATGAATATGTATATAGGAATAGTCATGATAAAACTACTAATTATTATAAAATTTTTGGAAAAAGCA

TAACTATTAAAAATGAAATTGGTAACTTAAGACTACTCAATACATCAACAAAAATGATTGAACTATGCAAAAACATGGATGAATTTCAA

AAATGA|AATTT|TTTTTTTTTTTTTGAGACGGAGTCTCGCTCTGTCGCCCAGGCTG >chr11:57519965-57520014 - E=4e-18
