# Supplementary material for: Chromothripsis during telomere crisis is independent of NHEJ, and consistent with a replicative origin
Source: HighWire-hosted journal article supplement (doi:10.1101/gr.240705.118), 2019-03-14
Supplement: Supplemental_file_1.zip [file contig.2.DB93_length_325_mean_cov_23.1353846154.docx]

**DB93_length_325_mean_cov_23.1353846154**

AGAGGGACATTGGGACATATCTCTGCACTGATCGCTGAGGTGATGTAAAACTTGTCTAGGCTTTGCCTACAGTGGGATTTATGA|CATA
 >chrUn_gl000216:159150-159264 + E=3e-51 p=0e+00 >ch
TTTCTGCACTGATCACCCAGGTGATG|GACTCTTGTCTTGGATCTGCCTATGGGGGCATAGTGACATATCTCTGCACTGATCACTCATG
r18:109908-110123 + E=4e-97
TGATGTAACGCTTGTCTAAGCTGCGCCTAAAGGGGAATTGTGACAGATATCTCCACTGATCACCCAGGTGATGTAACTCTTGTCTAGGC

TCTGCTTACAGGGGGTATTGTGAGATATCTCTGC|TTTGGTCCCCTAAGTGATGTAACAAT
