# Supplementary material for: Chromothripsis during telomere crisis is independent of NHEJ, and consistent with a replicative origin
Source: HighWire-hosted journal article supplement (doi:10.1101/gr.240705.118), 2019-03-14
Supplement: Supplemental_file_1.zip [file contig.2.DB93_length_351_mean_cov_5.1566951567.docx]

**DB93_length_351_mean_cov_5.1566951567**

CAGAGTATAGATGGGAACACCCTCTACTTTGTACTCAATTTTGCTGTGAACCTAAAACTTCTCTGAAAGATAAATTTTATTTTGAAAAA
 >chr21:30264219-30264487 + E=4e-144
CACTATGATACACTAAAACTTCTTTTGTCCTTATTTGGTAATACTTAGAAATATAATTTTATTAAGATTATATTTAAAAGTAGAGTCAA

AAGATATGCATGTTTTAGTGAAATATCTTCTATTGTTATTACTATCATCATAGTTATTATTATTTGACTTAGAAATCCTTATTAGACAT

T|GTGAGAGTGTGTGTGAGTAAGTGTGTATGTGAGT|GTGAGTGAGACTGTATATATGTGCTGAGTAGGAGAGAGGGGGTCAGGGA >chr3:81595386-81595420 - E=5e-03
