# Supplementary material for: Chromothripsis during telomere crisis is independent of NHEJ, and consistent with a replicative origin
Source: HighWire-hosted journal article supplement (doi:10.1101/gr.240705.118), 2019-03-14
Supplement: Supplemental_file_1.zip [file contig.2.DB93_length_355_mean_cov_3.80281690141.docx]

**DB93_length_355_mean_cov_3.80281690141**

ATATATCGTCTCTATTAGTAAATAACAAATGATATACAAACCTCTGTAGAGAATCGTAAAACTTTAATAAGAGGCTTTAAAAAGACCAA
 >chr18:3123398-3123635 + E=2e-128
AACGAATGAAGAAAAATAACATGTTCATGGATTAGAAGGTTCAATATTTTTTAAATGTCAATTATTCCTTAATTTTTTTACAGATTCAA

TGCATCCTCAATCAGAATTCTAATGGGTTTAGTTGGGTTGAATGTAAGTTTTTTT|ATTG|CAAGTGGCAAGGGGAAGAGTCTTGGGAA
 >chr3:7494942-7495064 - E=5e-62
CTAAGCCTCCAACTTGTGGGGTTTCACAGCATGCCAGATAGATCATGTAGGAATTGAAGTAGAGGACAGTCAGCTTGTGTCCACTGCAG

A
