# Supplementary material for: Chromothripsis during telomere crisis is independent of NHEJ, and consistent with a replicative origin
Source: HighWire-hosted journal article supplement (doi:10.1101/gr.240705.118), 2019-03-14
Supplement: Supplemental_file_1.zip [file contig.2.DB93_length_366_mean_cov_6.89890710383.docx]

**DB93_length_366_mean_cov_6.89890710383**

TACCTTTAATATATTTTCAGTTTTAAGATTGGCTGGCCAGGGGCGGTGCCTCATGCCTGTAATCCCAGCACTTTGGGAGGCCGAGGCAG
 >chr3:47779358-47779486 - E=1e-56 p=0e+00
GGCGGATCACGAGGTCAGGAGATCGAGACCATCCTGGCT|GATAGCT|CTGATCAGGCTGGACGCGGTGGCTCACACCTGTAATCCCAG
 >chr3:47760901-47761132 + E=1e-127
CACTTTGAGAAGCCAAGGTGGGTGGATCACCTGAGGTCAGGAGTGCAAGACCAGCCTGACCAGCATGGTGAAACCCCGTCTCTACTAAA

AATACAAAAATTAGCCAGGCATGGTTGGGGGGCATCTGTAATCCCAGCTACTAGGAAGGATGGAGGCAGGAGAATCACTTGAACCCAGG

AGGTGGAGGTTG
