# Supplementary material for: Chromothripsis during telomere crisis is independent of NHEJ, and consistent with a replicative origin
Source: HighWire-hosted journal article supplement (doi:10.1101/gr.240705.118), 2019-03-14
Supplement: Supplemental_file_1.zip [file contig.2.DB93_length_397_mean_cov_6.29722921914.docx]

**DB93_length_397_mean_cov_6.29722921914**

TAGATAGATCGATCGATAGATAGAGATAGATGATAGATCGATAAATGGGAGCTTATTAAATATTAACTGACATGATCACAAGGCTCCAC
 >chr18:1333120-1333231 - E=3e-46
AACAGGCTGTGTGCAAGCTGA|G|ATTCAATGAATTTTACTTCTCTCATTCTTCAGACTGATATATTAGAATGTCCTAGATGCCACAGA
 >chr18:3081604-3081891 + E=2e-155
GGAATTTCCTGGAATTTGATCTATTTTAGCTAATAATTACTTTCCTAAAATGTATTCTGAAAGAAACAGAACAAAGGAATAAGCCCCAA

GCATTCTACATTGGAATTTTACTAATTCTCATTTTTATGACTCAGGAAATAATCAATCATAATACTAACGAAAACACTGTTTTCTATAA

CAGTAAAGTCATCTTAAAGAAAACACAAATGGCTGCTTTGTGG
