# Supplementary material for: Chromothripsis during telomere crisis is independent of NHEJ, and consistent with a replicative origin
Source: HighWire-hosted journal article supplement (doi:10.1101/gr.240705.118), 2019-03-14
Supplement: Supplemental_file_1.zip [file contig.2.DB93_length_427_mean_cov_3.86416861827.docx]

**DB93_length_427_mean_cov_3.86416861827**

AGTAGAAAGTTTTGCTTTACTAACACCTGAAGAATGATACAATCACAGGCAATCTGGTTTTTATATGTTGTATTACATTAAAGTAAAAG
 >chr17:57808039-57808200 + E=2e-82
CACTGATACCTGTAGTATGAAATGAAGCATGTTATAAATAAAGTACATTTAACTATCTTAAACAT|CTCAAGT|GATCCACGCACCTCC
 >chr17:57810572-57810
GCCTCCCAAAGTGCTGGGATTACAGATGTGAGCCACCACGCCCAGCACAAAATGCATATACACTGTAAACCGGTAATTCCATTTCTAGG
845 - E=6e-153
AATGATTAGGTATAAGGTGAAATGACTTGCACAACTTTATTGACCACAGCATTATTTGTACTAGCAAAAAATAATCAATAACTTATATA

TTACCAATAGAGGACAGAAGAGTGATTAAAGTACAGCACACTCGTACAATGGAAAGAAAAACTAAGCAGCCAT
