# Supplementary material for: Chromothripsis during telomere crisis is independent of NHEJ, and consistent with a replicative origin
Source: HighWire-hosted journal article supplement (doi:10.1101/gr.240705.118), 2019-03-14
Supplement: Supplemental_file_1.zip [file contig.2.DB93_length_435_mean_cov_9.55632183908.docx]

**DB93_length_435_mean_cov_9.55632183908**

GCTAATTTTTTGGTATTTTTTTGTAGAGATGGGGTCTCATCACATTGCCCAGGCTGGTTCTGACCTCCTGGGCTCAAGTGATCCACCCA
 >chr17:50313923-50314231 + E=5e-168 p=1e-02
CTTCAGCCTCCCAAAGTGCTGGGATTACAGGCGTGAGCCATCATTCTGGGCCTAAGTAACCCTATCATCTAAATATGCCTCTTAGGAAA

TTGCATCATAGTCTTCAAGTGGAAGAGGCACGTTATTTAGAGTATATTGACTAAGAGTGCATTTTCTGGCCTCAGGAAAAAAAAGGTTT

AAATCCTGGTGTTATCAATGATTAGCCATGGGACCTTGT|ATCCCAGGATTTCCCTAGTTGAGACCTCCAGTGTCATTTTAAGGAGGCT
 >chr17:47900289-47900384 - E=1e-45
GACTCTGGGCTCCTGACAGCCACAGAGTAGGGCAAGAAGTTTAAGA|TCGGAAGAGCGTCGTGTAGGGAAAGAGTGTTCAG
