# Supplementary material for: Chromothripsis during telomere crisis is independent of NHEJ, and consistent with a replicative origin
Source: HighWire-hosted journal article supplement (doi:10.1101/gr.240705.118), 2019-03-14
Supplement: Supplemental_file_1.zip [file contig.2.DB93_length_480_mean_cov_4.0625.docx]

**DB93_length_480_mean_cov_4.0625**

CGGTGGTCTTTCAGTCATGCAGAAAATCCCAATATTATAATATTTATCTATGCCTATTATCAAT|AGATTTGAAACTAGCTATTAAATG
 >chr3:81764682-81764854
AGTTGTTTCATATATGGAATTACTCTAAGACTAATTGGTATATACCACCTACTATGTGCCAGGCATGGTACTACACAAGAAAGAATAGA
 + E=6e-92
TTCACAAATAAAAGACTGAGTTATATATTGCTAGTCCCATTAGCAACTGACCTTCAATT|CCTC|TTTATTCCAGGATTTGCCTCTGAA
 >chr16:69680409-6968064
GCAGGGAGTGTCTGCATTAAAAATGACCTGTAGTTCTCTGCTTCATAGGTTAGAAACTTATTTTAATATTTTGTGGCTAAGCACAGTCC
9 + E=7e-133
CACTTTTCAAATTCTATAATGAATTATTTAATTGGCATTGAATGTGGACCACCAGCATATATTTCATATTGGGGTTTTCTTTATTACTT

TAAATGATTAAAATTCAATAGAATGTCCAGCTGAGGCA
