# Supplementary material for: Chromothripsis during telomere crisis is independent of NHEJ, and consistent with a replicative origin
Source: HighWire-hosted journal article supplement (doi:10.1101/gr.240705.118), 2019-03-14
Supplement: Supplemental_file_1.zip [file contig.2.DB93_length_496_mean_cov_7.25806451613.docx]

**DB93_length_496_mean_cov_7.25806451613**

TTGGATAACTTTGCCAATAACTAGAACTCCCTCAAAAACAAAGGCTAGGTCCCTGACTCCTATAGGCATGACCAAGAGTATACTACAAA
 >chr8:17757800-17757997 + E=6e-107
ATGATTCCTCTGAGACTGAAATGTTTTTTTCCTGCTTCCCCCTCAGAGACACATTGTGGAAAAATTCTAGAACTTTTAGAATAGACATT

GTGTGCTTGACTCCAGCGA|GCTGCTTTGGCCTGCCGGTATATCTTTGTTCGGAAAGGCCCTGTCATTCCTAATTATTAATTACTAGAA
 >chr8:17782449-17782748 + E=2e-168
TGGTTTATGCAGTACCGTTTGAAATTTATTTGTCTTCACAGAATTTTTTCAACCTGTTTGAATTTGTCCTATAACTGGATAGCCTCTCT

TTCCAAATCCATTTAATCTCAAGTTCTCTCCTACAACATTCCTATTAATTGGCTGTTCATGAACTCTACTTGTCGAACTTGTTATACCT

TGACCGAAATTTAGTTGTCTAAAATTACTTTATTATTATTTTTTGTACTTCG
