# Supplementary material for: Chromothripsis during telomere crisis is independent of NHEJ, and consistent with a replicative origin
Source: HighWire-hosted journal article supplement (doi:10.1101/gr.240705.118), 2019-03-14
Supplement: Supplemental_file_1.zip [file contig.2.DB93_length_548_mean_cov_4.92700729927.docx]

**DB93_length_548_mean_cov_4.92700729927**

CGTCTGGCTCTTTCTGCATTTGATAAAGTGACTGACGGATGCTAGGTGCTCAATAAACATCTGTTAAGTTAACTCTGACTTTCTCGTGG
 >chr19:29357461-29357786 + E=5e-184 p=6e-03
TTGGAACAGCTATCATCAGAGCACACCAAGAGACAGGTTTAGGAGCCTCCATCCTCTTGTATACGTAAGAGGATCTGAGTGGAGGTTCC

CCAGAAGCAGATCTGGAGATGAAGATTTGAGGGCAAGTAGTTTATTTAGATGAAATTAGGAAGAAAAGGGAAAACCACCAGTCAGGTGC

AGCTATGGAGCCAGCCACCACCATGGGCGGGTGGAGCTGAATCCCGTGGGGAACTCT|G|ATACCAATTACAAGTAGTAAGTTGCCATC
 >chr19:29356901-29357125 - E=
TATGCGTCTGACCCATCAGCTGTAAGTTGGGATTCCCACCACTCCCTTGGGTTTGCTTAATTTGCTAGGATGGCTCACAGAACTCACGG
4e-123
AAGCATGTTTACCATTTTATTATAAAGGATGTCATCATGGACACAGATGGACAGCCAGAGGAGGAGAGTCACAAGGTAAGGTTTGGGGT

GGAGCCTCCATGCCCT
