# Supplementary material for: Chromothripsis during telomere crisis is independent of NHEJ, and consistent with a replicative origin
Source: HighWire-hosted journal article supplement (doi:10.1101/gr.240705.118), 2019-03-14
Supplement: Supplemental_file_1.zip [file contig.2.DB93_length_588_mean_cov_9.0119047619.docx]

**DB93_length_588_mean_cov_9.0119047619**

TGTCACAAAAGCCCATGGACAGAGCACAGGAAAGACAGGCACATAACCTGAATATCAGCTTCAGTGGTATGACCCAATGCCTCCTGTGA
 >chr7_gl000195_random:15162-15621 - E=1e-243
GCGTTCCAAGGCAGGAGAGGAGACTCACATTACCTGTGTGCAAGACCCAGTGATACGTCACACGGAGGAGTACCACTGTCTTGCATATT

GTGTAAACTATGGTAGAGAAATTGTCACCACAGGGCTCGCCACACTGGTGAGATTATACTTCTCAGATTCACACCACACCAATATTCAG

GATGGTCTCTATCACATGTGGAGAGAGCCCACTCTTGAGGTCCTGAATTACACATGCAGACATAGTCCACAACTGGGATTCTGACTTTC

ATATGTGAACATCCAGCCACAGGTGGGATGGTGACTCATTTTTAAACGCAGCTCATAGGCAGTTAAGAACTCTTATTTGGACCCATCCA

AGTAGAAAG|ATGTT|CGCAGTTGGGGGCTCAAATCACTGACAGGAAGAAGCTGTACTCTGGGCAATGATGACACCCCTTCCTTAAATT
 >chr17:47899202-47899338 + E=4e-64
AAAAAAAAAAAAGGCAAACCCATGTATCAAAGATTGTTTAATGAAAATGCAGTTTT
