# Supplementary material for: Chromothripsis during telomere crisis is independent of NHEJ, and consistent with a replicative origin
Source: HighWire-hosted journal article supplement (doi:10.1101/gr.240705.118), 2019-03-14
Supplement: Supplemental_file_1.zip [file contig.2.DB93_length_649_mean_cov_9.01386748844.docx]

**DB93_length_649_mean_cov_9.01386748844**

GAAGTCCAGAGTGGTAAAATCACATCATGGAGCCATTGGGCCAATGTTACTTCTGTACTTTTGCCCAATCATCCTTACCCTGTGGGTAT
 >chr3:128403861-128404183 + E=5e-182
CATCCTCATTCTTGTCACCTCAGGGTCATAAGATGGCTGTTACCTCCTCTATCACATCCGCATTTCAGACAGGGTAGAAGGGAAGAGAA

AATGGCAAACCATACTTGCCAGCTCAGTCAGCCCTTGTTTTTATGAACTTTTCAGGAAGCCCCACCCAGTAGCTTCTGCCTACACTTCA

TTACCTAGAACCATATTATATTACTTGGCCACTTCTCCCTCCAAGGAACAC|TGAG|TTTTTTTAAAAAGCAAATTCAGTGTAATGCTA
 >chr6:12084320-12084651 + E=2e-181
TGGCAACTCTCTCAGCTTTGTCAGTGCTGGTTATTCTGGTCAAGCTTTCCTCATTCTGGATCAGTTTGGGTAGTTGTGTGTTTTTCTAC

GATTTTACTAGTTCATCACAATTTTCAAATTCATTAGCACAGAGTTGAGTCTTTGATTTCTTTTTCACTTACTGCAGGCAGTGTTTTTG

TTTGAAATATTGCTAGTCTAGACTATCATTTTCAGCATTATAACCGCGTGTCATCTTCCTCAAAGACAGGTAAGTCCAGCGGTATTTGA

GATGTGAAACTCGGAGGATAAAATGGGT
