# Supplementary material for: Chromothripsis during telomere crisis is independent of NHEJ, and consistent with a replicative origin
Source: HighWire-hosted journal article supplement (doi:10.1101/gr.240705.118), 2019-03-14
Supplement: Supplemental_file_1.zip [file contig.2.DB93_length_657_mean_cov_7.43835616438.docx]

**DB93_length_657_mean_cov_7.43835616438**

TTTTATCTCAATGCATGCAGGAAAGAGGGAAATGTTCTCCATAGGTTTAGAGACTTGTAGGCATTAGAATCCCTGTTAAGACTTGTTCT
 >chr3:116460853-116461206 + E=7e-196
TTGAAAGGCAAACCTTCAACCCTAAAATCTAACTCAAACCTTGAATGGAAGGAATAAGCCTCTGCATTCATCACTAAGGCAAGTAGTGT

GCCCCAAAGCCTGGCCAGGGCAATAACTTATGAGCAAGTTAGAGCTGAGGATATCAAGTCAAATAACCAAGACCGCATTGTGAGAAGAA

AAAAAAAAGGGGGGAGAGAGAGAGAGAGATCTGGAGTTTAGCAGGGACTCTGAGGACAGCTGCAGACTGCCAGACAAGAATTA|AA|TT
 >ch
CCACTGGGTCAGATAAAGCAATATAATTCTAATGTTATTTGCCTTAAGTCCAGAGGAGTGATAGGATTGGTTAGGTGACATTTTGTTGA
r3:116461482-116461789 - E=6e-173
AGACAGAGTAGGAGAAATGTTTGGGGGAAAAAATTCCCGATATGGCATAATATCATAATGTCCACTCATAATTGCTAAATGACAATTGT

CATTTGCTTTTATATCAGATATCTAATTAATCAAACTTTCTGGTTAAGTGCCTCCAATTATTAACAATCCTGCTCAGAGTTAAGATTAG

CATCCAAGGATTTTCCTCCATATTTCTTTTCAGAGG
