# Supplementary material for: Chromothripsis during telomere crisis is independent of NHEJ, and consistent with a replicative origin
Source: HighWire-hosted journal article supplement (doi:10.1101/gr.240705.118), 2019-03-14
Supplement: Supplemental_file_1.zip [file contig.2.DB93_length_670_mean_cov_6.92835820896.docx]

**DB93_length_670_mean_cov_6.92835820896**

TTATCTTATGTAGGATGGGATCTCACTGTGTAGTCCAGGCTGGGCTCAAACTCCTGACCTCAAGTGATCATCCTGCCTTGGTCTCCCAA
 >chr17:57807798-57808114 + E=2e-178 p=3e-02
AGTGCTGGGATTATAGGCATGAGCCACTGCACCCGGCCCCAGTTGTCTTTTTATAAGTGTCTGGGCAAGTTTTAATATTGTATTAAGGA

CTCAGCATTTATTGTATTAAGGACTCAGCATTTTAGCCTTTTATTGAAGTGATGTGCTTTTTGAGTAGAAAGTTTTGCTTTACTAACAC

CTGAAGAATGATACAATCACAGGCAATCTGGTTTTTATATGTTGTATTA|T|ATGATGACTTTTATTAATATGGATGATTTAAGTAGAA
 >chr17:57809373-57809715 + E=6e-179
ACTTTCCTTCATGCATTTAAAGGAAAATGAAAAAAAAGTTTTTCTTTTGTTGTAATCATACTTTTTTTTTAGCTTTTGAATTGTTTGAC

ATCTCAAACACATGGCAAATAATACTCTAGTGTGGTAATATTTTCACAGCAATCCTCTACTTTTAGAGGAAGTGCAAGGAATCTGAAAT

AGTAGTTTTCATTTGTTTGTTTGTTTGTTTGCTTTTTGAGACGGAATCTCACTCTGTCACCAGGCTCGAGTGCAATGGTGCGATCTTGG

CTCACTGCAACCTCCGCCTCCCGCGTTCAAGCGATTCT|CCTGCCTCAGC
