# Supplementary material for: Chromothripsis during telomere crisis is independent of NHEJ, and consistent with a replicative origin
Source: HighWire-hosted journal article supplement (doi:10.1101/gr.240705.118), 2019-03-14
Supplement: Supplemental_file_1.zip [file contig.2.DB93_length_764_mean_cov_14.0536649215.docx]

**DB93_length_764_mean_cov_14.0536649215**

TGCTTTTCTGCCTCTCATGTTCAAGCTACCCAGCTACCCATTACACATCTGACACATTTCTATTGAGAAAAATCCCTCATAGATCCAAT
 >chr6:40372853-40373261 + E=1e-233
AACAATGATAGATGTCATCGGAATACCTGCCATTAGCAAGAGAAGCTGAAGAGGCAGCAGGGTACAGTGGATATGCACACAGGCTCTGG

AGTCAGACTGTAGGGTTCCAATCCTGGTTTTGCACATACCAGCTGTAATACCTTATCTTGGGCAAGTTTCTTAATCTCTCTGTGTTTGC

TTCCTAGAAATATCCCCTTTCTGTAAAATGGGGCGTTCATAATCTCTGCCTTATAGGGTTGTTATGAGGATTCAAGGAGTCATGATTCA

TAAAGTACCTAGGTCAGTGCCCGGCACAGAGTAAGCCCCGCATGAGGG|TCTG|AGCTGAGGGTTAATCAGAACCAGGGTAGCCACACT
 >chr6:40310452-40310812 + E=1e-201
TCCCTTTCAGATAATTCCAGGGCGGCTCTGAGTCTCTAAAACCTGTGAGAAATGCCACAGCTGGGAGACTTTCCTTTCCTCCTTGATTC

AAGGAAGTCCAAGAGCCAGGGATGGTGCCCCTCACACTGCCAGGAAGGCCTGACACTACCCCTCCCCATGGCGCAAGCTGAGGCCAATC

CGCTCCTTATTTAGAAAGAGCTGGGACTTAAATGTCAGTGGATGATACGGGAGCAGCATGACAATTACCAGCTTAAACTGAAATAAAGG

AAAGAAGGATTAAAAAACACCCAGCACCCATCAAGCCAGGCCAGAAGAGGAGAG
