# Supplementary material for: Chromothripsis during telomere crisis is independent of NHEJ, and consistent with a replicative origin
Source: HighWire-hosted journal article supplement (doi:10.1101/gr.240705.118), 2019-03-14
Supplement: Supplemental_file_1.zip [file contig.2.DB94_length_269_mean_cov_4.0780669145.docx]

**DB94_length_269_mean_cov_4.0780669145**

TGCCTGGCTAATTTTTGTATTTTTGGTAGAGGTGGGTTTCACCATATTAGCCAGGCTGGTCTAGAATGCCTGGCCTTAAGTGATCCGCT
 >chr8:21109719-21109852 - E=1e-44
CCCCTCGGCTTCCCAAAGTGCTGGGATTACAGGCGTAAGCCACC|GCGCCCGGCCAAAG|TTTTTTTTTATTTATAAAATAGGGATAAT
 >chr9:102849181-102849303 -
GTAATTCCTACTTCACGTTCAGAGTTGCTATGATGATTTAAAGAGATAATATACATGTTTGTAAACTGTTGATAGAAGATACTGTTAGA
E=3e-62
TTAA
