# Supplementary material for: Chromothripsis during telomere crisis is independent of NHEJ, and consistent with a replicative origin
Source: HighWire-hosted journal article supplement (doi:10.1101/gr.240705.118), 2019-03-14
Supplement: Supplemental_file_1.zip [file contig.2.DB94_length_306_mean_cov_30.0261437908.docx]

**DB94_length_306_mean_cov_30.0261437908**

TTATCAGCTTATCTCTGTTTTATAACTGTATTTTAATTAGTGTTATACATAAATTTGTTATATTATTTTGAAAAAAGCTTATGGAGGGA
 >chr9:102849294-102849550 - E=4e-137 p=2e-03
GTTGTGTTTTGTCGTATAGTCCATTGGTTTTAGAATTAAAGGAGATTAGGGTTTGAATTCTGTTCTGCCATTAATTTGGACACGTCACT

TAGCTTATTTGAATCTTATTCGTTTAATAAATATTCTCCCTTTTACTGTATGCCAGAGACTGCAAAGTTTTTTTT|TTT|TTTTTTTTT
 >chr16:7044
TTTTTTTTTTTTTTTTTTTTTTTTTTTTTTTTTTTTGTTT|T2789-70442841 - E=7e-14
