# Supplementary material for: Chromothripsis during telomere crisis is independent of NHEJ, and consistent with a replicative origin
Source: HighWire-hosted journal article supplement (doi:10.1101/gr.240705.118), 2019-03-14
Supplement: Supplemental_file_1.zip [file contig.2.DB95_length_373_mean_cov_5.3163538874.docx]

**DB95_length_373_mean_cov_5.3163538874**

GTTTTCCCAGAGCAGTGCCTCTCCATAACTCTTCCTAGGGCCCGTCTAATCCTGACACTGCAGGT|AGAATTCTAGGTGCAAG|CTACC
 >chrX:138384829-138384911 + E=7e-38 p=0e+00 >chrX:138385220-13838
CAAAGGCTGCCATTTTGAGATGATTCTGCCCCCACCAGTTTCTCCAGGCCAGAAGCTGATTGTCTGTTGTTTTAGGTGCAGCTCAAAAC
5526 + E=4e-170
CTCCAGTTTTGCCTTCTGTAAGAGCACTGACCCAACTCTGCAAACCATTGCTAGTTAGTAACAATCAGAAAAGGATATGTGAATGCTTA

TTCTTCTCCATGCTATTTTCTAACCTGGCTGTATTAACAGCTAATCAGAAATTAATGCTATGAGTAGGCACTCTTCTGACTTAAGAGGG

AGCAAGTCAGCGAAATA|CT
