# Supplementary material for: Chromothripsis during telomere crisis is independent of NHEJ, and consistent with a replicative origin
Source: HighWire-hosted journal article supplement (doi:10.1101/gr.240705.118), 2019-03-14
Supplement: Supplemental_file_1.zip [file contig.2.DB95_length_469_mean_cov_8.96801705757.docx]

**DB95_length_469_mean_cov_8.96801705757**

CCTCCCCGTTTTTTTGTTTTTTTTTTTTTGAGAAGTAGTCTCACTCTGTTGCACAGGCTGGAGTGCAGTGGCATGATCTCCGCTCACTG
 >chr17:40777731-40778032 + E=2e-133
CAAGCTCCGCCTCCCGGGTTCAGGCCATTCTCCTGCCTCAGCCTCCCGAGTAGCTGGGACTACAGGCGCCCGCCACCACGCCCGGCTAA

TTTTTTGTATTTTTAGTAGAGACAGGGTTTCACCATGTTAGCCAGGATGGTCTCGATCTCCTGACCTCGTGATCCGCCCGCCTCGGCCT

CCCAAAGTGCTGGGATTACAGGCGTGAGCCACCA|TGCCCTGCCAGAATGAGCACCTCTTCACAGGGAGTACACAAGCTCTGAGGAGAT

CGGAAGAGCGTCGTGTAGGGAAAGAGTGTTCAGAGCCGTGTAGATCTCGGTGGTCGCCGTATCATTAAAAA|ACAGCGTGGGTAACAAG
 >chr5:131065451-
AGCGAAGCTCTGTCTCAAAA|TATATA131065488 - E=1e-04
