# Supplementary material for: Chromothripsis during telomere crisis is independent of NHEJ, and consistent with a replicative origin
Source: HighWire-hosted journal article supplement (doi:10.1101/gr.240705.118), 2019-03-14
Supplement: Supplemental_file_1.zip [file contig.2.DB95_length_796_mean_cov_5.27638190955.docx]

**DB95_length_796_mean_cov_5.27638190955**

TAATCTCTAATTTATTTTAGATCATTTTGAAACACTGTGGTTTCAGTTTTTATCTGCTTTGTGGACTTATCCTGCAGGTGTAATCTCCT
 >chr13:110506517-110506965 + E=1e-254
TATCTGCAGGAACAATATTTTGTTCCTTATTCCTTTCCTTGGAGTGACTTTATATGGACTTCTGCAACCCTTTTCTGTTACTCATTTTT

ACCTGAGATTCACTTTCCTGAATTTTTAGGAGGGAGAGATGAGTCTAAAGAGTGTTTTCAGCTCCAGGCTCTGGACCTCTCTCTGGAGT

TGTTTTCCTGAAACCATTAAGTGTGGGGCTGGTCCTTGTTCACCCACCCAGGATCCCTGTCCCTCCCTCTCCCCCCTTCTCTCTCCTCC

CTACCATCTCTATCCTGCTCTTTTGTATTCTCTTCCCACCAGCTTCTCCTCTTTGTGGCATTGAGTCCTGGAGGGAGCTTGGCTTG|TT
 >
GGTT|ATTTTTGCTGTTTTTGCCTGAGCTTTTGGTGTGATTAAAAAAAAAAGCATTGCTAAGGCCAATATCAAGGAGTTTTCTTCTTAT
chr13:110691057-110691413 + E=3e-181
GTTTTCTTCCAGGAGTTTTAGTTTCAAGTGTTCTGTTTAGGTCTTTAATTCACTTTGAGCTGATTTTTGTGTATGGTGTGAGACAAGAG

CCCATTGTCATTCCTTTGAATGTGTATATATAGTTTTCCTGCACAATTTATTGAAGAAACCATCCTTTCTTCACTAACATATGCAAATC

AATCAGTGTGGCATACCACATAACCTCATGGTCATCTCAGTGGATGGAGAAAAAGCATTTGACACAGTTCAACATCCTTTCATGAT
