# Supplementary material for: Chromothripsis during telomere crisis is independent of NHEJ, and consistent with a replicative origin
Source: HighWire-hosted journal article supplement (doi:10.1101/gr.240705.118), 2019-03-14
Supplement: Supplemental_file_1.zip [file contig.2.DB96_length_296_mean_cov_4.2027027027.docx]

**DB96_length_296_mean_cov_4.2027027027**

TTTGCTATTTTTCCCTGGTATTTTGCTGGGTGTTATAAGGAAGTGTGAAACAAGAAATGTGTTTTGCCTGTACCAAACATTTGGTTGTA
 >chr5:132245607-132245844 - E=1e-128
GAAATCAATAATACAAAAGAAAGCAATAGGAATTATTTATTAGTGTTTAATTGGATGTGTAGTTGTGTGCATCACACTTAGACGTAAGT

TGTCTTCTCTTTGTATTCTGTTCTTTACCTAGAACCTCTTTACCTAGGTGCCTCAC|AAA|AAAAAAAATTACAAAAACTAACTGGTTT
 >chrUn_gl000220:143704-143766
CATAACCTGGACTCAAAGTTAATAAATAGAT- E=6e-26
