# Supplementary material for: Chromothripsis during telomere crisis is independent of NHEJ, and consistent with a replicative origin
Source: HighWire-hosted journal article supplement (doi:10.1101/gr.240705.118), 2019-03-14
Supplement: Supplemental_file_1.zip [file contig.2.DB96_length_490_mean_cov_23.3448979592.docx]

**DB96_length_490_mean_cov_23.3448979592**

TAAAGAAATAATCCTTGTGGGAAGGAAAACAAATACATATAGGAATAAAGTATGGGCTGGGCATGGTGCCTCACACCTGTAATCCCAGC
 >chr1:68256317-68256650 - E=8e-162
ACTTTGAGAGGCCAAGGCGGGTAGATCACGAGGTCAGGAGTTGGAGATCAGCCTGACAAACATGGTGAAACCTTGTCTCTACTAAAAAT

ACAAAAATTAGCCAGACGTGGTGGTGGCGGCACACGCCTGTAATCCCAGCTACTCAGGAGGCTGAGGCAGGAGAATCGCTTGAACGCGG

GAGGTGGAGGTTGCGGTGAGCCGAGATGGTGCCACTGCACTCCAGCCTGAGCAACAGAGCGAGATT|AGTTTTCTTGAGAAAGCTAAAT
 >chr1:68280983-68281
CTGAGGATTCTGGGACATGAGTGTTACTCATGGCCAGCGTCATCATACGGAGCCTGGGAGCAAATTGTTTTTTCAAGAGGTGTATGTAG
140 - E=7e-80
GCTGTTGAATTTTGACTAGAAATGGCTTTAGTGGTCAACATTAATT
