# Supplementary material for: Chromothripsis during telomere crisis is independent of NHEJ, and consistent with a replicative origin
Source: HighWire-hosted journal article supplement (doi:10.1101/gr.240705.118), 2019-03-14
Supplement: Supplemental_file_1.zip [file contig.2.DB96_length_501_mean_cov_9.58083832335.docx]

**DB96_length_501_mean_cov_9.58083832335**

TACAGTCATAACAAAATAAGGTGTGCTTAAATCATCCTGCTTTTCTGGGAAATTTTTTAACATGTATACATAAATGGAGCATAAAGCCA
 >chrX:93886137-93886430 - E=8e-165
ATAAGAAACAAGGCCTGTTAATAGAAAAACCAAACTCTGTAATACATTTAAAGAGGTTTATTCCTAGCTAATATGACTGACCATGGCTC

AGGGAACAGTCTCAAGAGGCCCTGAGAAAGTGTGCCTAAATAAGTTGGCTTAGAATTTGGTTTTATACAATTTAGGAAAATGGGAATTG

TAGGTAAAATTAGAAAATTAATACAT|AGATTTATAAATATTATAT|ATTTATAATTATTTTTGTACTTTTATCTTTAAAATTGTGTAG
 >chrX:93857329-93857518 - E=4e-102
AGGAATAACAAGTGGAGTTATAAATAATTACAATATACTTATTTTTATATTTTTCTATGTATTACTTTTACTGGAGAACTTTCTATTTT

TTTTATGCCTTTGAGTTGCTCTCTAGTGTTTCTTATTTGATATGTAATCTGATAGAAT
