# Supplementary material for: Chromothripsis during telomere crisis is independent of NHEJ, and consistent with a replicative origin
Source: HighWire-hosted journal article supplement (doi:10.1101/gr.240705.118), 2019-03-14
Supplement: Supplemental_file_1.zip [file contig.2.DB96_length_528_mean_cov_8.35606060606.docx]

**DB96_length_528_mean_cov_8.35606060606**

TTAAAAAAAGGGCTGGGCATGGTGGCCCACATCCGTAATCCCAGCACTTTGGGAGGCCAAGGCAGGCAGATCACTTGAGGTCAGGAGTT
 >chr6:151511509-151511833 + E=2e-183
CGAGGTCAGCCTGGCCAACATGGTGAAATCTCTACTAAAAATACAGAAATTAGCCAGACGTGGTGGACCGTATCTGTACTCCCAGCTAC

TTGGGAGGCTGAGGCAGGAGAATCACTTGAACCCAGGAGGCAGAGGTTGCAGTGAGCCAAGATTGCGCCACTGCACTTCAGCCTGGGTG

ACAGACTGAGACTCCGTCTCAAAAGAGCAATTGAGCCCGGGTGCGGTGGCTCACGCC|ACA|TCAGGTGGGAAGCTCTGGCTTAGGAAA
 >chr6:151358704-151358905
TTACTGAATCATAGGAGTTCTCATTTTTGATGTTGTTGTGATGGGATCATGTTGCTATTGGATGATTATTCTGTTATTTTGTGTTATCT
+ E=2e-109
ATGGGGGTAAAGGAGATGGGCAGATAAATAAAAGCTTATCAAAGTGCTTAAAATCCATGAAGATGGGCTTCATTTGGTACAGCTA
