# Supplementary material for: Chromothripsis during telomere crisis is independent of NHEJ, and consistent with a replicative origin
Source: HighWire-hosted journal article supplement (doi:10.1101/gr.240705.118), 2019-03-14
Supplement: Supplemental_file_1.zip [file contig.2.DB96_length_568_mean_cov_18.3521126761.docx]

**DB96_length_568_mean_cov_18.3521126761**

TTCCTGGGATTCCCCATTGGAATATGCTGTATTAAAGCCCACTTAGTGCTTACCTAGAACAGTGCCTGGCACAGGTAAGCACAAATACA
 >chr1:28836926-28837225 - E=3e-168
ATTGCTTTAGGAAGATGCCTTTTTTTTGAGACTTAACTCTGTCACCAGGCTGGAGCGCAGTGGCAAGGTCTCAGCTCAGTACAACCTCC

ATCTCCCGGGTTCCAGCAATTCTGCCTCAGCCTCCCACAGGTGCACACCACCATGCCCAGTTATTTTGTATTTTTAGTACAGACAGGGT

TTCACCGCGTTGGCCAGGATCTCTAGATGT|TG|ACTCAGCCGGGCATGGTGGCTCACACCTGTAATCCCAACACTTCTGAGAGGTCGA
 >chr1:29065847-29066118 - E=2e-151
GGAGGGCGGACCTCTTGAGCTCAGGAATTCAAGACCAGATTGGGCAACATAGTGAAACCCCCATCTCTACAAAAAAATTAAAAAAATTA

GCCGGGCATGGTGGTCCCAGCTACTTGGGAGGCTGAGGCGGGCAAAATCACCTGGTAGGCAGAGGTTGCAGTGAGCCGAGATTGCACCA

CTGCACTCCAGCCTGGGTGACAAGAGTTGACACTAC
