# Supplementary material for: Chromothripsis during telomere crisis is independent of NHEJ, and consistent with a replicative origin
Source: HighWire-hosted journal article supplement (doi:10.1101/gr.240705.118), 2019-03-14
Supplement: Supplemental_file_1.zip [file contig.2.DB96_length_578_mean_cov_7.94809688581.docx]

**DB96_length_578_mean_cov_7.94809688581**

TCATCAGCAAATCCAGAAAACAACCTTTCCTGGAACTTTCTGACCACAGAAATCTCATCCCAGATCTGAAACTTAAGCAGAAGGCAAGA
 >chr11:14814371-14814731 - E=5e-202
TTAAGGGTCATAATCTCATATGGATACCATACCTCTGTAGGACACTTGTTAAGCAGCCATTTGTCTTCAAAGATTCATTTTAATGCAAT

CTCGAACTCTTTACAGAACTTAAACAGGCTTTAGAGGAGTAGTAATGGCTGACATAAAGTCAAATGTGAAAAGCGCCGTAAGAGAATGT

GTTATGGAAATTCAGAGGAAGAAAAGAGTACTTCTCCTTGGAGAAGGGAGAAGGACCTCCAGGTGTTATCCTTATAAGGTGATTTATGA

GCCC|TTCTTTGCCTTTTTTGGTTTAAAGTCTGTTTTGTCTGAAATTAGGATTGCAACCTCTGCTTTTTCCTGATTTCCACTTGCTTGG
 >chr11:14846862-14847094 - E=3e-109
TAGATTTTCCTCCATCCCTTTGTTTTGAGCCTATGGGTGTTGCTGCCTGTGAAATGGGTCTCTTGAAGACAGTGTATCATTGGGTCTTA

CTTTTTTTAAAATCCAGTTTGCCACTCTATGCCTCTTAAATGGGG
