# Supplementary material for: Chromothripsis during telomere crisis is independent of NHEJ, and consistent with a replicative origin
Source: HighWire-hosted journal article supplement (doi:10.1101/gr.240705.118), 2019-03-14
Supplement: Supplemental_file_1.zip [file contig.2.DB96_length_615_mean_cov_8.4487804878.docx]

**DB96_length_615_mean_cov_8.4487804878**

GCATCTCCCAGCCAAGGAACGCCAAGGAGGCCGGCAGCCGCCAGGAGCTGGAACCGGCAAGGAAGCAGCCTCCCCCAGAGCCTTCTAGA
 >chr12:124927497-124927806 + E=3e-174
GAATGTGGTCCTGCAGCACCTTGATTTCCAACTGCTGGCCTCCAGTACTGTGAGAGAAGAAAGTTCCTGCCATTTTCAGCTGCCCGGTT

CACGGCCGAGTGTTAAGGCAGCGCTGAGAAGCTAGTCCGGCGTGTGATCTTCCACAAACCGCGGTGCTGTCACTGCAGCTGGAAAACGA

CTCGGTGAGCATGAGGCCTCGGGGTGGTGGTGATGTGCAT|GC|TCCCCCTCCCTCTCTCCCCATCCGCGGCGGTGGCGGCGTCAGCAG
 >chr12:124873968-124874273 + E=8e-163
TGGTAAGAACAGATGAGGGTTCCAGAAAAACAGAGCTTCTCCACCCCCGGCAGACAGGGAGCAAACAGCTTCTTCCGCCATCATCCCCC

GCCGCCCGTCCCCCCACCCTCCGTGTCAGTTCCACCTGAGCTCTGCCCCCTGCCTGGCCTGATGCGGCCGAGGCTGACCGAGCCCTCTG

TCGGGGACTGTGGGTGGGCAGGGCTAGCCTCGCAATCCGGAGGGATCCCGGGATTTGAGGAGCCTTTGCACGGTGCACAT|CAG
