# Supplementary material for: Chromothripsis during telomere crisis is independent of NHEJ, and consistent with a replicative origin
Source: HighWire-hosted journal article supplement (doi:10.1101/gr.240705.118), 2019-03-14
Supplement: Supplemental_file_1.zip [file contig.2.DB96_length_1032_mean_cov_36.3837209302.docx]

**DB96_length_1032_mean_cov_36.3837209302**

AAAAGGAGG|AAACAAAAAGAAAGAAAGAGAAA|AAAAGGGA|GAAGGAAAAAAAGACAGAAAGAGAGAAAGAAGGAAAGGAAGAGAGG
 >chr10:21644451-21644474 + E=7e-02 p=0e+00 >chrUn_gl000220:102865-103869 -
AAGAAAAACCTAAAGAAGGAGAGAAAGGAAGAAAGGAAGGAAGAAAAACACGAAGGAGAGGAAGAAAGAAAACAGAGATAACTACGTAC
E=0e+00
GCTCGTTCATTTACACACATAAATACGACGCTTTTCATACGTAAAATAAACGTCTTTATCGACGATCCCTTCTTTATAGAGCGATGTGT

ATTTATTTGTATAACACAGACACCTACATCTATCATACAGAAGTCTATTTCCATACAACCGATACGTATTTACCATACGCAAGAGTATT

CAATGCAGAGATACACGTTGTCGTTGTTTGCATATAAGCGTACAGAAACGTTTACATTAATACATATAAGTAAACGCGTGGAAACGAAA

GAAATAAAAAAGCGAAATGAGTCAACAGGCCGGGCACGGTGGCTCACGCCCGTCATCCCAGCACTTCGAGAGGCCGAGGTGGGCGCATC

ACAGGAGGTCGGGAGTTGGAGACCAGCCTGAGCAACATGGAGAGACACGGCGTGCCTACTAAAAACACAAACATCAGCCAAGCCAGGCG

TGGGGGTGCCTCCCTGTCATCCCCGCTAATCGGGAGGCTGAGGCAGGAGAAGCGCTCGAACCCGGGAGGCGGAAGGTGCGGTGAGCCAA

GACCGCGCCATTGCACTCTAGCCGTGGAAACAAGAGTGAAACTCTGTCTCAAAAGGACGAAACAGAAAGAAAGAAAGAAAGGAAGGAAG

GAAGGAAGGAAGGAAGGAAGAAAGAAAGAAAAGAAAGAAGGAATGAATGAAAGAAAAGAAAGCAAGAAAGAAAGAAAGAAAGAAAAAGA

AAAGAAAGAAAGAAAAGAAAGCAAGAAAGCACGAAAGCAAGCAAGCAAGAAAGCAAGAAAACAAGGAAGCAAGAAAGCAAGCAAGAAAG

AAACAAAAGAAAGAAAGCAAGAAAACAAGAAAGCACGAAAGCAAGCAAGCAAGAAA
