# Supplementary material for: Chromothripsis during telomere crisis is independent of NHEJ, and consistent with a replicative origin
Source: HighWire-hosted journal article supplement (doi:10.1101/gr.240705.118), 2019-03-14
Supplement: Supplemental_file_1.zip [file contig.2.DB98_length_432_mean_cov_5.20833333333.docx]

**DB98_length_432_mean_cov_5.20833333333**

TAGCAGGGTGTACCAAGCACTCCTGTAGGGCAGGAGCCCCAGGGACATATGTGGAAGCCCATATATCTTGGGGAATATGTGGAAGCGCA
 >chr21:40318701-40318859 + E=1e-80
TATACAAGAAATGATCCCTCTCCTTCCTGGGTGTCTGCACCATGGGACATGCTCTCGGAGGCAGCTTGC|TATATT|TCCGCCCGCATG
 >chr21:4049
ATCCAACCACCTCCCACCAAGCCCCGCCTCCGACAGTGGGGATTGCAATTCAACGCGAGATTTACAGGAGACGACATCCAAACTATTCT
0329-40490597 + E=7e-144
GCTGGGGGTGGTGTGCATAGCAGGGAAGGAAGGTAGCGTGGATGCAGATGTCCCAGCAGGGTCTCGGATGGGGTTGGAAAGGCCTGTTC

TCTCCCCTAGGAGTAGCCAGGACAGACCAGGCCTGGATGGGACCTGGAAGACACCTCCTGGTTCCCATTACATTTGCA
