# Supplementary material for: Chromothripsis during telomere crisis is independent of NHEJ, and consistent with a replicative origin
Source: HighWire-hosted journal article supplement (doi:10.1101/gr.240705.118), 2019-03-14
Supplement: Supplemental_file_1.zip [file contig.2.DB98_length_443_mean_cov_4.40180586907.docx]

**DB98_length_443_mean_cov_4.40180586907**

AAAATAAGTTCATAAGGCAATAAGTGTGAATGAATCAAAACCCGTATAAACAATTAAGGACTCAGAATGGAGTAAAAAGGAAATTCACC
 >chr3:18222649-18222764 - E=1e-54
TCCATTAACAACTAAGTGACACTTAG|TTGTCT|ACAAAAGTTTGATTTTGTTGTTGTTGTTGTTGTTGTTTTAACTGATATACAGTAT
 >chr3:18221418-18221740 - E=2e-179
ACAGTGAACAAGAAAGTACTTACTGTTCCTTTTTGCTTGAATGCCCTGATTAAAAACCCTCCCTCCCTATGTCACTCTGATGGTAACAC

TTTTGCAGTGGTGTTTTTGAGGAAAGAGAGAGGTGAAATCAAAATTGTTTTATACGAAATGAAGGAAATCAATTTTGACACGACACGAA

TCTAAATGAAACATCTTTCTTTAGAAGTAGGTAAGATGTGTGAAATGACAGCAGAACTGGAGGTGGAAGAAACTGCTCTAAAAGAACTG
