# Supplementary material for: Chromothripsis during telomere crisis is independent of NHEJ, and consistent with a replicative origin
Source: HighWire-hosted journal article supplement (doi:10.1101/gr.240705.118), 2019-03-14
Supplement: Supplemental_file_1.zip [file contig.2.DB98_length_537_mean_cov_8.14711359404.docx]

**DB98_length_537_mean_cov_8.14711359404**

ACGAAAAAAAAATTAGCCAGGTGTGGTGGCAGGCGCCTGTAGTCCCAGCTACTAGGGAGGCTGAGCCAGGAGAATGGTGTGAACCCGGG
 >chr7:139071073-139071329 - E=1e-128
AGGCGGAGCTTGCAGTAAGCCAAGATCACACCACTGCACTCCAGCCTGGACGACAGAGTGAGACTCCATCTCAAAAAAAAAAAATTTCC

AGTGACAGAGAAGAATATTTCCAGTGACAGAGATTTTGTAATTCTTTGTAAATGTGCTTGATGTTTGTGG|TT|TTGTTTCTATTATAA
 >chr7:139192338-
AACAACAAAAATAAGCATGGATTTTCTTATTGTAAAACTAACACGTAGGCTGTTTTCATGTAAACAACATATAAATGTTTAAAATAATT
139192627 - E=3e-156
TTTCTTTAGAATTTGGCATACTAATTACATGCGTCTAAGTACTTTTTAAATGTATGCAAAATAAATCCTTATGAACTTTTTTTCACACA

AATGGGATGACTTCATGCACTCTGCAAACTTGCTTCTTGTGTCATTTCATATAGCTCCATCACATTCTTAACCTAGAATTCCAGAGCAG

GCCAG
