# Supplementary material for: Chromothripsis during telomere crisis is independent of NHEJ, and consistent with a replicative origin
Source: HighWire-hosted journal article supplement (doi:10.1101/gr.240705.118), 2019-03-14
Supplement: Supplemental_file_1.zip [file contig.2.DB98_length_681_mean_cov_8.37004405286.docx]

**DB98_length_681_mean_cov_8.37004405286**

ATCATTTATAAGATGTATGCGAAGATAGTTTGGGAATCTTATCTTGTTTAAGAACCAATATTATGAAAAATACCTATTATCTAATGGTC
 >chr2:167696219-167696497 - E=2e-155 p=4e-02
AAAAAGACAGATTGGATTAAATTTTATCTACCGACAATAGCTAAACAGTTTTTTAGGATTATTTCTTTATTTAAATAATATGGAATTCT

GAATTGAAGTTTCTGCCCCCATTTCATAGAAATGTGTAGTTTTTATTGTTTAGCTGATTCTGAAGCCACAACAATTGAACTAAGAGTTA

GTGCAATGC|AA|TAAATGGGACATATAGCTGTGGGAAAACAATGGATAATTTTATAAGATATAATAACTCCTCACACAACTCTTCATT
 >chr2:167695121-167695526 - E=6e-232
ACATTCATCAGAAAGAGAAACTATTAAAAATTTTAATATGGGGTCTATTAGACATTTCAGGACACATAAAACTTCTTTGAATTATGCTT

ATTTTTCAAAAATATCATATTAAATTTACTTGAGTTTTTAGGAAACAATATAATATGGACATTTTATATGTACAAACAAAAATATTTTT

TAAGTTACTTTGACATTTTGGATGTATGGCTGAATGAATAAATAATATATTTTACACTTGTCTTTGCTATATTTTTTAAAGCTGTATTA

ATTTTTAACTAGCCACTTTACTCAATCCTTTTTTGTTTTCATAATCAGGCAATTCTTTTG
