# Supplementary material for: Chromothripsis during telomere crisis is independent of NHEJ, and consistent with a replicative origin
Source: HighWire-hosted journal article supplement (doi:10.1101/gr.240705.118), 2019-03-14
Supplement: Supplemental_file_1.zip [file contig.2.DB99_length_274_mean_cov_1.64233576642.docx]

**DB99_length_274_mean_cov_1.64233576642**

TTTCTTTCTTCATTTCACCGTTGTATCTCCAGGTCTTTGATCCACTCTAAGAATGGCTTCTCAGCTCTGTTCCTTGT|CACCACCAC|C
 >chr10:127890256-127890342 - E=2e-40 p=4e-02 >chr10:12
CTGCCCCCATCACGTACACAAAATCTAAGTCCTAACAACTCTCCAACGTCCATCTCAAACCAAATCCTGGGCTCTTTCTGTAGAGTCTT
7889271-127889446 - E=4e-73
GGACTCTCCAACCTATTGAGAAGCCTCTCTACTTTGAACGTTCTGAACCATTTAGAGCTTCTCATCTGGTGCTTTG|ATTCAGCTGATT

ATGCTTTTGC
