# Supplementary material for: Chromothripsis during telomere crisis is independent of NHEJ, and consistent with a replicative origin
Source: HighWire-hosted journal article supplement (doi:10.1101/gr.240705.118), 2019-03-14
Supplement: Supplemental_file_1.zip [file contig.2.DB99_length_329_mean_cov_5.01519756839.docx]

**DB99_length_329_mean_cov_5.01519756839**

ACTAGTATGAAATATTTTAGGGCACAAAAAACTGCACTCATATAAGACAATGGACTTAATCAATAAATATTGTGTGTGTTCTGACTACT
 >chr12:126705456-126705616 + E=5e-85
CTACCAACTGGCCATTTCCCCATCCCTGTCCCTCTTCTAAGACTTTTTATTCCCTGAGACTACACAGTAA|T|TACACACACACACAGA
 >chr12:126999980
CACACACACGCATACACACGGTTTGGCTCTGAAAGTAGTAATTTTCCTTTCTTCTATATGTCCATTGAAATCATTCAAGACGCTCAAGA
-127000150 + E=5e-88
CACATTTAGCAATGGTGGATGGCAAAATGAAGGATAACAGGGGTTATTTAAGTTAAACATGCAT
