# Supplementary material for: Chromothripsis during telomere crisis is independent of NHEJ, and consistent with a replicative origin
Source: HighWire-hosted journal article supplement (doi:10.1101/gr.240705.118), 2019-03-14
Supplement: Supplemental_file_1.zip [file contig.2.DB99_length_390_mean_cov_16.5384615385.docx]

**DB99_length_390_mean_cov_16.5384615385**

CCAACTTGGGTCCATTCTCCTCATCACTTTCAGGTACACCAATCAGACGTAGATTTGGTCTGTTCACATAGTCCCGTATTTCTTGGAGT
 >chr3:94783244-94783397 + E=1e-77 p=0e+00
CTTTGTTCATTTCTTTTTATTCTTTTTTCTCTAAACTTCCCTTATCACTTCATTTCATTCATTT|AATAATACTTATAAT|ACTTAATA
 >chr3:9
ATACTTATAAAATCTCAACTCATACCAAGTTATCTTTTCTAACCAAAATTGAATTCTACTAGACATCAATAACATAAGAAGAACAGGAA
4787356-94787578 + E=3e-122
ATTTTCAACTAAGAAGAAATTAAGCAACACATCCTCACCCCTGAATAATCAATGAGTCAAAGAAAAAAATCGAAAGAAAAACTAACAGA

CACTTCTCAAAAGAAGACATTTATGAAGCCAAAAAA
