# Supplementary material for: Chromothripsis during telomere crisis is independent of NHEJ, and consistent with a replicative origin
Source: HighWire-hosted journal article supplement (doi:10.1101/gr.240705.118), 2019-03-14
Supplement: Supplemental_file_1.zip [file contig.2.DB99_length_458_mean_cov_8.47816593886.docx]

**DB99_length_458_mean_cov_8.47816593886**

TGGGTTCAGACGTGTGCTCTTCCGATCT|AAAATAGGAAGAGAGTTTGCAAAATAGGAGCATTTACCAGAAGCCTCTCT|CTCCCTCCC
 >chr8:144119973-144120060 - E=9e-35 p=0e+00 >chr8:14
TCCCTCCCTCCCTCTCTCTCTCTCTC|TGTGTCTCTCAAGTAGAAGTGGGGTCTCTATGTTGCCCAGGCTGCTCTTGAACTCCGAGGCT
4119460-144119840 - E=2e-208
CAAGCGATCCTCCTGCCTCAGCCTCCCAAAGTGCTGCGATTACAGGTGTGAACTACTGGGCCCAGCCCCAGGCCCTCTTACAGGAGTGG

GCTGCCTAGAAACATTCCAGTGCCATATCCCACTCCACTCCGGGTGCAGGGACAGGACCCCTGCCACCCCCAACCCAGGCCCAAAAGGA

GGGGCCAGGAGGGGAGGGGCCACCAAGGCAGGTGAGCTGCTTAAGAGGAGCGAGGGCTGTGGACAGTCCTGCGGACTGCAGGAGGGGCC

AGCAGGATCAATATCC
