# Supplementary material for: Chromothripsis during telomere crisis is independent of NHEJ, and consistent with a replicative origin
Source: HighWire-hosted journal article supplement (doi:10.1101/gr.240705.118), 2019-03-14
Supplement: Supplemental_file_1.zip [file contig.2.DB99_length_685_mean_cov_7.02189781022.docx]

**DB99_length_685_mean_cov_7.02189781022**

AAAAAGACTTAGACTCCCACACAATAATTGTAGGAGACTTTAACACCCCACTGTAGGTATTAGACCTATCAATGAGACAGAAAATTAAC
 >chrX:121135465-121135842 - E=4e-212
AAGGATATGCAGGACTTGAACTCAGCACTGGATCAAGTGGACCTGGTAGACATATACAGAACTCTCTACCCCAAATCAACAGAATATAC

ATTCTTCTCAGTGCCACACGACGCTTATTCTAAAATCAACAACATAAATGGAAGTAAAACACTCCTCAGCAAATGCAAAAGAACTGAAA

TCATAACAGTCTCTCAGACACAATGAAATCAAATCAGAACTCAGGATTAAGAAACTCACTCAAAACCACACAACTACATGGAAATTGAA

CAACCTGCCCCTGAATGATGT|TA|GATTGCCATTCTAACTGGTGTGAGATGGTATCTCATTGTGGTTTTGATTTGCATTTCTCTGATG
 >chrX:121631979-121632283 - E=4e-165
GCCAGTGATGATGAGCATTTTTTCATGTGTCTTTTGGCTGCATAAATGTCTTCTTTTGAGAAGTGTCTGTTCATATCCTTTGCCCACTT

TTTGATGGGGTTGTTTTTTTCTTTTAAATTTGTTTGAGTTCATTGTAGATTCTGGGTATTAGCCCTTTGTCAGATGAGTAGGTTGTGAA

AATTTTCTCCCATGTTGTAGGTTGCCTGTTCACTCTGATGGTAGTTTCTTTTGCTGGGCAGA|GG
