# Supplementary material for: Chromothripsis during telomere crisis is independent of NHEJ, and consistent with a replicative origin
Source: HighWire-hosted journal article supplement (doi:10.1101/gr.240705.118), 2019-03-14
Supplement: Supplemental_file_1.zip [file contig.2.DB102_length_243_mean_cov_3.71604938272.docx]

**DB102_length_243_mean_cov_3.71604938272**

C|TGGGCTCAAGCGAGCCACCTGCATTGGCCCCCCAAAGTGCTGGGATTACAGGCGTGAGCCACTGCGCTTGGT|GGAGAAGATCGGAA
 >chr15:66820668-66820739 + E=3e-12
GAGCGTCGTGTAGGGAAAGAGTGTCTTCGCCTGTGTAGATCTCGGTGGTCGCCGTATCATTAAAAAA|AATGGCCCCTTTTTCAGTATA
 >chr5:164898848-1648
ATGAATTTTTTATCTTAAACATACTAAATATACTATAAGAAATGATATTTTGACATGATTTCAGGCAA98937 + E=2e-42
