# Supplementary material for: Chromothripsis during telomere crisis is independent of NHEJ, and consistent with a replicative origin
Source: HighWire-hosted journal article supplement (doi:10.1101/gr.240705.118), 2019-03-14
Supplement: Supplemental_file_1.zip [file contig.2.DB102_length_273_mean_cov_5.89010989011.docx]

**DB102_length_273_mean_cov_5.89010989011**

TCCACGGCTGGGCTTGGGTGGCTGCAGCTGCACCTGTGAGCTCCTACCCAGCAAAATTGGAAAGGGCAGGGCTCCCGCTTGTCCCCGGC
 >chr2:34373193-34373358 + E=4e-85
TCCCCTGGCTCAGTAGAGCATGCAACCCCGGCCATGCCTCTGATATTGGAGCAGGCACTGACAGCAGGGAGAAGGC|CCCTAAAAATTC
 >chrX:8374
AATGTGTCAAAATTTGCCTAAGCTCCCCGGGAGCCTAATTACTGTTGGCACTCAGCTCAGACCATTTTTAGGACAGGTGTGTCTTTTAA
727-8374835 - E=9e-54
GATGCTG
