# Supplementary material for: Chromothripsis during telomere crisis is independent of NHEJ, and consistent with a replicative origin
Source: HighWire-hosted journal article supplement (doi:10.1101/gr.240705.118), 2019-03-14
Supplement: Supplemental_file_1.zip [file contig.2.DB103_length_675_mean_cov_8.37777777778.docx]

**DB103_length_675_mean_cov_8.37777777778**

CACACATTATAAGTAGAAGCATAAGTCTTTCCATTTAAATGGAACCTTGAAAGGCAGAATAAACCCATCTAACAAATCATATCATATAT
 >chr9:106440667-106441016 + E=3e-198 p=3e-02
ATATTATATATATATATGTATATCTGAGAAAGAACCCTTGGAGGAGGATAGACTTCCACTGTAGCTATACCAGTGAAGGAATGATAAGA

CTTTCCTGCCTTCAGTATTTTATATGTGTACTTAGTTAAGGCCCACTGGAAAGAGTTACAGGTATATAGAGATTCTCCTTGCTCTTTGG

CATGGTTCACAGACATGCCAGCACACACCCAATCTTTCAAAAAGTTCTTCTGTCATCTTCTTGCCTTTACAATAGCAGCAC|G|AATCT
 >chr9
CTGCATAGGTCTTACTGGGCTAAAATTAAGGTGTCAACAGGACTACATTCCTTCTTGGGGCACCAAGGGAAAACCACATTTCTTTTTTC
:106439665-106439992 + E=5e-185
AGCTTCTAGAGGCCACCTGCATTCCTTAGCTCATAATCCCCTTCCATCTTCAGACCCCAAAATTGCATCAACACAAACCTCTGCTTGTC

TTATCTCCTCAGACTCTGACATTTCCTGCCTCCATCTTTCACTTATTAGGACTCTTGTGATGACGTTGGACATGAGTGAACATAATACA

GGACACTTTCTCAGTCTCAATATTCTTAACCTAATTACATCCGCAAAGTCTCTT
