# Supplementary material for: Chromothripsis during telomere crisis is independent of NHEJ, and consistent with a replicative origin
Source: HighWire-hosted journal article supplement (doi:10.1101/gr.240705.118), 2019-03-14
Supplement: Supplemental_file_1.zip [file contig.2.DB104_length_264_mean_cov_11.0416666667.docx]

**DB104_length_264_mean_cov_11.0416666667**

CCCCCCCTCCTTCCTTCTTTCCTTC|CTTC|CCTCCCTCCCTCCCTCCTTCCTTCCTTCCCTTCTTACTTTCCCTCTCTCCCTCCCTCC
 >chr1:24439870-24439899 + E=4e-03 p=0e+00 >chr12:7253724-7253916 + E=1e-101
CTTCTTTCTTTCCCTCTTTCTCCTTTCTCGCTTTCTTCCCTCCCTTCCCTTCCCTCTCCCTTTTCCTCCTTCCTTCCTTCCTCTCTTCC

TCGCTTTCTCTCTTCTAGTTTCTCCGTGTCTCCCAGGCTGG|CGGGCGGGGGCCTGAGTGTGTCTGATCGGCCCCTCACCACCTCCGGC
