# Supplementary material for: Chromothripsis during telomere crisis is independent of NHEJ, and consistent with a replicative origin
Source: HighWire-hosted journal article supplement (doi:10.1101/gr.240705.118), 2019-03-14
Supplement: Supplemental_file_1.zip [file contig.2.DB104_length_268_mean_cov_3.35820895522.docx]

**DB104_length_268_mean_cov_3.35820895522**

CCAAGTCTCACCTTCATCTGAATCAAAGAGCATGTCTGAAGTGATAGTTTTAACTTCCTATTCTGATGGTAGGGAGGATGGTAGGAAGG
 >chr6:110885788-110885990 - E=1e-99
ATGGGGGGGGTGCGTTCTTTGTCCTTGTGGATTTCTGATTTTTTTTAAAAAAAATTATTTTTGTTTTTTGTAGAGACGGGGTCTCCCTA

TGTTGCCCCGGCTAGTCTT|GAAC|GCCTGGCCTCAGGTGATCCACCCACCTTGGCCTCCCAAGGTGCTCGGTTTACAGGCAGGAGCC|
 >chr6:110886898-110886965 + E=6e-17
TCTC
