# Supplementary material for: Chromothripsis during telomere crisis is independent of NHEJ, and consistent with a replicative origin
Source: HighWire-hosted journal article supplement (doi:10.1101/gr.240705.118), 2019-03-14
Supplement: Supplemental_file_1.zip [file contig.2.DB104_length_344_mean_cov_6.10465116279.docx]

**DB104_length_344_mean_cov_6.10465116279**

GAAATCACCACCACCGAATGGAGGATTTGATATGAATGAACGACATCTTTCTTCTTATATAATCATATAACAAATCACATTATTAAATG
 >chr2:5491146-5491257 - E=2e-55
TTAAGTAAAAACATTACAAG|TT|CGACCTCTGTTCAGACGTCAGGGGAGATCTCCAGGCAGGTCAGTACCTTCTCTGTCTGGCATTCA
 >chr2:5490089-5490324 - E=3e-130
GTTGGGGTCTTCAGTATGCTGAGAATCCTTCTTTACTAAGGCAGAGTCCGTCCAGATGTACCCAGACATCACAGCCCTCACCAGCCTGT

GATTACAAAATAAGGTGACCTTCGTTTTAAAGGCCAAATTATCAATTGAAACACACTGGCCTGGTCACTGGAAATTAAG
