# Supplementary material for: Chromothripsis during telomere crisis is independent of NHEJ, and consistent with a replicative origin
Source: HighWire-hosted journal article supplement (doi:10.1101/gr.240705.118), 2019-03-14
Supplement: Supplemental_file_1.zip [file contig.2.DB104_length_439_mean_cov_5.6013667426.docx]

**DB104_length_439_mean_cov_5.6013667426**

TG|GTGGCTCACGTCTGTAATCCCAAACACTTTGGGAGGCCGAGGTGGGCGGATCACCTGAGGTCGGCAGTTCAAGACCAGCCTGACCA
 >chr5:37352053-37352382 + E=2e-164 p=0e+00
ACATGAAGACGCCCCGTCTCTTCTAAAAATACAAAATTAGGCCGGGCACAGTGGCTCACGCCTGTAATCCCAGCACTTTGGGAGGCCAA

GGCAGGTGGATCACGAGGTCAGGAGTTCAAGAACAGCCTGGCCAACACAGTAAAACCCTGTCTCTACTAAAAATACAAAAAAATTAGCT

GGGTGTGGTAGTGGGTGCCTGTAATCCCAGCTACTTGGGAGGCTGAGGCAGGAGAATCGCTTGAAC|TCAGGAGGCGAGACTGCAGTGA

GCACCAAGGTGGCTAA|ACTGCACTCTAGCCTGGGCAACAGAGTGAGACTCTGTAACAGAAAAA|GCAGAGGGGTGGATTGAAAGGC >chr12:48564897-48564944 + E=1e-10
