# Supplementary material for: Chromothripsis during telomere crisis is independent of NHEJ, and consistent with a replicative origin
Source: HighWire-hosted journal article supplement (doi:10.1101/gr.240705.118), 2019-03-14
Supplement: Supplemental_file_1.zip [file contig.2.DB104_length_444_mean_cov_4.05405405405.docx]

**DB104_length_444_mean_cov_4.05405405405**

TCATGATAGTTACATTTATGTACACACTTATCAAAATGTATTAAATTATAAATTTAAGATGGCACTTTCTTCCATGTATGCTATAAAAT
 >chr18:30970687-30970888 + E=2e-109 p=3e-02
AAAAAAATTGTTTTACTCTAAAACCACTAAAATATTTTTATATATTATAAATACATACACACATACATACATAAATATAAGGTTAAAAT

GCTTGCAGATTAACTTATGTTAA|CACTTGCTGCTTCACTGTGCACTTTCATGCTATGGAGATGACTTTTTTCCTTAGACTTCATGAAC
 >chr18:30980457-30980700 + E=9e-135
CAACTTCTGCAAGCTTCCAACTTTCCCTCTGCAGCTTCTTCACCTCTCTTAGCCTTTATAGAACTGAATAGAGTTAGGGCCTTGCTCTT

GATTAAGCTTTTGTTTAAGGGAATGTTGTGTCTGGTTTGATCTTCTATCCAGACCACTAAAACTTTCTTCGTATCAGCAATAAGGGTGT
