# Supplementary material for: Chromothripsis during telomere crisis is independent of NHEJ, and consistent with a replicative origin
Source: HighWire-hosted journal article supplement (doi:10.1101/gr.240705.118), 2019-03-14
Supplement: Supplemental_file_1.zip [file contig.2.DB104_length_460_mean_cov_4.23913043478.docx]

**DB104_length_460_mean_cov_4.23913043478**

TGAAACTATCATCAGAGTGAACAGGCAACATACAGAATGGGAGAAAATTTTTGCACTCTGTCCATCTGACAAAGGCCTAATATCCAGAA
 >chr9:5298203-5298457 + E=2e-133
TCTACCAAGAACTTAAACAACTTCACAAAAAAAAAACCCCATCAAAAAGTGGGCAAAGGATATGAACAGATACTTCTCAAAAGAAGACA

TTTATGCAGCCAACAGACATGAAAAAATACTCATCATCACAGGTCATTAGAGAAATGCAAATCAAAACCACAA|TG|GGCAATATGGCC
 >chr9:5297414
ATTGTCATGATATTGATTCTTTGTATCCACGAGCATGGAATGCTTTTCCATTTGTTTGTATCCTCTCTTATATTCTTTAGCAGTGGTTT
-5297596 - E=8e-59
GTATTTGTCTTTGAACAGGTATTTCACCTCGGTTGTAATTTGTTTTGCTAGTTATTGTATTTTTTTAGTAGCAATTGTG|TAGGTTTGG

GTGCTCATGTTTTTGCTG
