# Supplementary material for: Chromothripsis during telomere crisis is independent of NHEJ, and consistent with a replicative origin
Source: HighWire-hosted journal article supplement (doi:10.1101/gr.240705.118), 2019-03-14
Supplement: Supplemental_file_1.zip [file contig.2.DB105_length_281_mean_cov_3.73665480427.docx]

**DB105_length_281_mean_cov_3.73665480427**

AGGCCCTTTCTCCTCCTTCTTCTCTCAAAA|TCCC|AGCTTGTCCCAATGCTCATTAGTGGTTGGATGCAGAAATTCCCAACGATTCCT
 >chr16:72410078-72410108 - E=1e-06 >chr16:72407338-72407585 - E=5e-138
GCTAATCCGCTAATTTGCCTATTTCCATCAATAGTTACTGGCTATTTGTTTCTGCTGCCCAGTCTTCACCTAACTTGCCTTACAAGAGC

TTGCTTTTAAACTGAGAATTTCTTTGCTTGCTTTGCCATATCCTTGCTTGGCTTTTCTTTCTTTAACAAGCACAACAGCATGCTGCTGC

ATCTTCAAAGAGTAAA
