# Supplementary material for: Chromothripsis during telomere crisis is independent of NHEJ, and consistent with a replicative origin
Source: HighWire-hosted journal article supplement (doi:10.1101/gr.240705.118), 2019-03-14
Supplement: Supplemental_file_1.zip [file contig.2.DB105_length_340_mean_cov_3.97058823529.docx]

**DB105_length_340_mean_cov_3.97058823529**

TGGGAAAATATGTGCATGGTAGAATCATGCAAATTACTGTGTAAAACTTCCTATAATTTGAAAGGTATTATGATATTTTATCTACCTCA
 >chr20:15183317-15183503 + E=1e-97
TGACCCAAGATGGCTGCTGGAGTTCCAGCCATCATCAGGTTAGAGTATGTCAGTGTAGACAGAAAGAAAAAGGAAAGTCAGAAGAGCAA

AATGAAAT|TTTT|CTTATCTACTTAAGAAAAGAAACTTTTAAGGCATTTCTTTACCTAAGGCCCTGGCCACCCTCTTGTGTCTCCTCT
 >chr20:15230634-15230784 + E=6e-79
GCTGCCACTCTTAAATACAAATTTTTGGCTACCTGGAAGGTCCAGGAAGGTCATCATGCCTTTGTTTGTGATAGC
