# Supplementary material for: Chromothripsis during telomere crisis is independent of NHEJ, and consistent with a replicative origin
Source: HighWire-hosted journal article supplement (doi:10.1101/gr.240705.118), 2019-03-14
Supplement: Supplemental_file_1.zip [file contig.2.DB105_length_443_mean_cov_12.1896162528.docx]

**DB105_length_443_mean_cov_12.1896162528**

TC|AACAAGGATACCCAGGAATTGAACTCAGCTCTGCACCAAGCAGACCTAATAGACATCTACAGAACTCTCCACCCCAAATCCATGGA
 >chr11:26906653-26906813 + E=1e-72
ATATACATTCTTCTCAGGTCTACATCGCACTTATTCTAAAATTGACCACATAGTTGGAAGTAAAGCACTCCTCA|TATATATTTATAAA

AGG|GACTTCATGGCAGCCCCTTCCATTTCTTGCCCAGAGGCCTAAGAGGAAGAGGAAAAAATGATTTGTTGTCCAGGCCAAGTGCCCA
 >chr11:26900625-26900889 - E=2e-147
GCTGCCTGGCATAGCCTCAGGACACTGCTCCCTGTATTCCAGCCACTCTGGCTTCAGCCTCAGCTCAAATAGTCCCAGGTCCAACTTGG

GCCACAACTCAGGAGGGTGCAACCCATAAGCCTTGGTGGTTTCCATGTAGTGTTAAGTCTGTAGATGCTCAGAATGTGAGTGTGAAGAA

G
