# Supplementary material for: Chromothripsis during telomere crisis is independent of NHEJ, and consistent with a replicative origin
Source: HighWire-hosted journal article supplement (doi:10.1101/gr.240705.118), 2019-03-14
Supplement: Supplemental_file_1.zip [file contig.2.DB105_length_569_mean_cov_7.64499121265.docx]

**DB105_length_569_mean_cov_7.64499121265**

TAACTGGTTGAAATTTAAAAATAAACAAAAAAACATTTAAGAATAATCACTATAAAATTTATAAAGAAAATATTATTGATATCCTAAGA
 >chr5:28923454-28923671 - E=5e-105 p=4e-02
GAAGATAAAATGAAATCACATAAAGTATTCAATTCATACCACAGAAGGCAAGTAAAGAGAGGAAGATAAGAAAAGAACCAAACAAGTGC

AACTTTAGTAAGGAGTAAAATATGGTAGATATT|AA|AAATTGACCAAAAGAAAATTCAGCCACGAATAAGCTATTGCAGCAACGTTGT
 >chr5:28922494-28922852 - E=8e-201
AACATACTAGTTTGATGTACAAAAGGTTGTTGCTGTTCTATATACCTTTGATAGACAACTGGAATTTGAAACAAAAAATACAATACCGT

TTATAACAGCACTAAATAACATGAAGTACTTTGGTAAAAATCTAACAAAATATGTATACCATTTATATACCCACTCTTTCTTTGTCTAG

CTAAGACAAAAATGATGACATGAAATTTCCCCTGGATCAGAGCATATATCGTATTTTTTTGCGACATTACTGAAACTCAGGTTAACGTT

ATAAAAGGTACGTTAATAGATATCACAATGTTCTATA
