# Supplementary material for: Chromothripsis during telomere crisis is independent of NHEJ, and consistent with a replicative origin
Source: HighWire-hosted journal article supplement (doi:10.1101/gr.240705.118), 2019-03-14
Supplement: Supplemental_file_1.zip [file contig.2.DB105_length_601_mean_cov_4.23960066556.docx]

**DB105_length_601_mean_cov_4.23960066556**

CCACCTTCTTAAACTAAAATCCAAGAAGTGCTATGAGATTTGATAGCCACTGAGTCCTAGAATGAAGACATGTAGAAGTTCTTGTTTGT
 >chr11:90286190-90286410 - E=1e-120
TTCCTTTTAGACATTTATTCATTTTCTTATATGACTTACAATTTTTCAGACTGCAGTTAGTCAAATTACTAATGCCAGTATATAATGTC

TTTACAGAAAGTTCCTTATTATCTGCAAAATGTGTAGTATG|C|TCCTTGGATCTAAAATGAAAGTTGAAATTAAAAAACAAAAAAAAG
 >chr11:90272427-90272812 - E=8e-213
GAATTACCAAAAGTAAGTATAGAAAAAGAGACAAACATTTATGGTAGTGAGGTTTGCTACACATAAAGATAGCAAGAACACACAGGGCA

GTAGAAAGTGCTACGGCAGACAAGAAGGTGCTAATCATAAAACTAGAATACCAATAAATATTAAAACATGGGCTCTGCTTTTACCATCA

TATACAGAGAGAGATCTGCCAGAGAGAGATTTATGGAAAGTTAAAGAACAGCGGTCAGTATAGCTCTGATCTTGGTGTCCATGGCTTCT

CTGGCTTCCATTATAGTAATCTTAGGTGAACTTTAAAAAAAAAAGTGTATGATTTAGTTCATAATTCTG
