# Supplementary material for: Chromothripsis during telomere crisis is independent of NHEJ, and consistent with a replicative origin
Source: HighWire-hosted journal article supplement (doi:10.1101/gr.240705.118), 2019-03-14
Supplement: Supplemental_file_1.zip [file contig.2.DB105_length_636_mean_cov_7.60377358491.docx]

**DB105_length_636_mean_cov_7.60377358491**

CAAGTTATGAGTTTCCATTCTTCCCTTCATCTCCAGCTCCAAAGAAACTGAGAAGTCTTGAAGCATCCTATAAACCAAATGCGACATTC
 >chr3:26774077-26774242 - E=2e-81
CATTGAAAAGGAGATAGGATTTCATGAAAAGAATCTGTCTCTGAAAAATCAGGAATGATGTATTTCTCTAGAATA|T|CTGAATAGACC
 >chr3:26769
AATAACAGGATCGGAAATTGTGGCAATAATCAATAGCTTACCAACCAAAAAGAGTCCAGGACCAGATGGATTCACAGCCGAATTCTACC
369-26769841 - E=2e-257
AGAGGTACAAGGAGGTACTGGTACCATTCCTTCTGAAACTATTCCAATCAATAGAAAAAGACAAGGTATTTCTGAAATATGAGAAAACT

TGATTCTTTCTGCTCACCAGGTCAGCACCAATTGTTGTCCCCTGCAGAACATGCTGGGTGGGGGAATTTTATCCCTAGACATATGGTTG

AAATTCATTAGGGGTATGATTAACTAAAGGAAGAATTGTCCCAGCTGGACACAATCTATGTTCTCACCATTCAGCTAGAGGAAAAGCAG

GAAAGGCCATTTCACCTAAGTCACCTACTCATCGATATATGGCCTACCTGGAAATCCCAAGGACTGGGATTAAGGCAGTGCATCTGATT

TCTCAGAACCAATAG
