# Supplementary material for: Chromothripsis during telomere crisis is independent of NHEJ, and consistent with a replicative origin
Source: HighWire-hosted journal article supplement (doi:10.1101/gr.240705.118), 2019-03-14
Supplement: Supplemental_file_1.zip [file contig.2.DB106_length_310_mean_cov_18.4096774194.docx]

**DB106_length_310_mean_cov_18.4096774194**

GACTAATGGTACAGTTTTTCTTTTCCTGGTTAGATTTTTAAAATGAAACATTATTTTTGGAATTTTAGAACTTGCACTGCCCTGCATCC
 >chr6:37813661-37813807 + E=1e-76 p=0e+00
TGGAATTTGTGAAGTGAAGTGTTCTCTCATCTCTACCTCAGCTCTTAGAATTGCTCT|AAGAGCTATTCTCAGCTCTTAGAATTGCTCT

AAGGCTGGGCACGGTGGCTCATGCCTGTAATCCCAGCACTTTGGGAGGCCAAGATGGGCAGATCACGAAGTCAGGAGTTCGAGACCAGC
 >chr6:37350471-37350604 + E=1e-65
CTGGCCAACATGGTGAAACCCCGTCTCTACTAAAAATACAAAAA
