# Supplementary material for: Chromothripsis during telomere crisis is independent of NHEJ, and consistent with a replicative origin
Source: HighWire-hosted journal article supplement (doi:10.1101/gr.240705.118), 2019-03-14
Supplement: Supplemental_file_1.zip [file contig.2.DB106_length_318_mean_cov_8.01886792453.docx]

**DB106_length_318_mean_cov_8.01886792453**

AAAGCTGAAACTGGATCCCTTCCTTACACCTTATACAAAAATTAATTCAAGATGGATTAAAGACTTAAATGTTAGATCTTAAACCATAA
 >chr3:60427979-60428215 - E=6e-131
AAACCCTAGAAGAAAACCTAGGCAATACCATTCAGGACATAGGCATGGGGGGAGTTTTTCTTTTCTATAGACCATCTTCCCACCACCAG

AAGTTCTTTTGATTCTATGTAAAAAGTCTTTGTCACTTAGGAGGATGAATCAGGAA|CC|AGGTTTCCCAGTACCATTTATTAAATAGA
 >chr3:60180019-60180103 - E=3e
GTGTCCTTTCCCCAGTTTATGTTTTTTAATGCTTTGTTTCAGATCACTTGGTC-39
