# Supplementary material for: Chromothripsis during telomere crisis is independent of NHEJ, and consistent with a replicative origin
Source: HighWire-hosted journal article supplement (doi:10.1101/gr.240705.118), 2019-03-14
Supplement: Supplemental_file_1.zip [file contig.2.DB106_length_478_mean_cov_5.96234309623.docx]

**DB106_length_478_mean_cov_5.96234309623**

TTGTTTGCACTGTTTGTATCTGTTACCCGTGGAGGGTCTGCTTCTACTGTTGTAATTGCTTGTGTTGTGACTTTGCATCATAGCTGGAG
 >chr3:187880909-187881181 + E=3e-152
ATCCCTCTGTAGTTCAAATGGAAAGCTGGTGTTGAAGGTGAAACCAGGTCTTCTTCAGAAACTTGTGTGGGAACCTTTCATGGGCTGGA

TAAGCATGAGGATCAGGACAGGGCAGGGTCACTGACCTTAAAGGAGGATGCTTTGACCTGCCTCCAGCATGCACCCTTCCTGCTGAAGC

CATT|G|CTCCACCGAGTTCGAGCTTCCTGGCCGCTTTGTTTACCTAATCAAACAACTAACTGGGCAATGGCAGGCGCCCCTCCCCCAG
 >chr3:188096135-188096342 + E=5e-107
CCTCACTGCCGTCTTGTTGTTTGATCTCGGACCGCTGTGCTAGCAATGAGTGAGACTCCATGGGCTTAGGACCCTCCGAGCCAGGTGGG

GGATATAATCTCCTGATGTGCCATTTTTAAAGCCC
