# Supplementary material for: Chromothripsis during telomere crisis is independent of NHEJ, and consistent with a replicative origin
Source: HighWire-hosted journal article supplement (doi:10.1101/gr.240705.118), 2019-03-14
Supplement: Supplemental_file_1.zip [file contig.2.DB106_length_497_mean_cov_6.33802816901.docx]

**DB106_length_497_mean_cov_6.33802816901**

TAAATAAGACTGCTGATGGGAGGGTTTTTTTTAACCTCTGGTAAAATGATTTTTAAAGTGGATTTATGGAAAAAGTAGCAAACACATCA
 >chr20:14707387-14707613 - E=2e-121
TGTGTGTGATTTTTTCCAAGTAATTCATATAGTCAGGGATAAGATCACAGCCTATTACTGCCACATAAGCTGTGTAACAGCTGTGTAAG

AGTCATCTGAGGAGAACAGAGCTGGAGGCAGGTGCCTGGGTTTGAA|TC|TGATCCTTCATTTATTCACATTAATTCAGCACATATTTA
 >chr20:14669237-14669510 - E=1e-149
GGAGACACTATGATTGATACTGACATTGGAACTGACTGAGATAGACAAATCTTGCCTATGTGAAGCTGACTACTTGGTGGAATGATGAT

AGCATGAATAGAAATGTCCCATATGTCAACAAGCTTCTAAAAATCTATAAAAATTTAAATTGCATTATGAATTCAAAAATATCTAATAT

TGTAGAGAAGATTCCCAAAAGATCCAATTACATAAACAATCCTCCATCTACTTT
