# Supplementary material for: Chromothripsis during telomere crisis is independent of NHEJ, and consistent with a replicative origin
Source: HighWire-hosted journal article supplement (doi:10.1101/gr.240705.118), 2019-03-14
Supplement: Supplemental_file_1.zip [file contig.2.DB106_length_519_mean_cov_5.20231213873.docx]

**DB106_length_519_mean_cov_5.20231213873**

CTGGGCATGATGGCATATGCCTGTAGTCTCAACTACTTAGGAAGCTGAGTCAGGAGGATTGTTTGAGCCTAAAAATTTGAGGCTATGGA
 >chr5:104007541-104007745 + E=4e-111 p=7e-03
GAGCTATGATGGGGCCACTGCACTGCAGCCTGGGCAACAGACAGAGATTCTGTCTCCAAAATAAAAACAACAACAACAAAAACAAATGG

GTATGCCATGTATCCCTGTTTTATTT|ATTT|ACAGAAATGTTTTATACCTGGATTACACTGTGGGTTAGATAGGGGAATATGCTTGTC
 >chr5:104193785-104194096 + E=1e-175
AAAATTTATTAAACTGTAAAATTAACTGTATTGAAGATACTCATCAACCAATAAGAAATAAAAAATTAGAGAAATTATGATTCTATATA

GCAATTAAATGGAATATTAAAATTTTGAAATAAAAAGACTAAAATATTTGCCTTGTTTCCTAAAAAAACTGAAGATTATTCAAACATTT

GAATAGAAGTTCATGTGTTAAAAATTTGAGAATAATTCTTGAGGTTTGAAAGAGTTGATAACTGATTCTTTTTCAT
