# Supplementary material for: Chromothripsis during telomere crisis is independent of NHEJ, and consistent with a replicative origin
Source: HighWire-hosted journal article supplement (doi:10.1101/gr.240705.118), 2019-03-14
Supplement: Supplemental_file_1.zip [file contig.2.DB106_length_532_mean_cov_5.18609022556.docx]

**DB106_length_532_mean_cov_5.18609022556**

ATCTACCTAGGGAGGTTAAGAATAATTTGTTTCAGAATGGTATTGCTTAAAGAGATTCCCAGCCTCTTTTAGTTTATGGCTTCCATTGA
 >chr3:114278184-114278516 - E=3e-188
TAATATGATGAAAGCTATGGACCCTCTTCCCAAAAGAGGGTGCAATACCTTTTCAAAGGATTCACAAACCCCCTCAAGCCTATTGGTGG

ACCTCAGATTAATTATACCTGGTTCACAATTGTGTTCTAAGTAAATCACTGTAGGACTGACTGGGCTAACAAGATTTCAGACCAGAATT

GTGCAATACGTATTTACCATATGATCTTGGACCAGTCATTAATGTAAATTGAGGTCCTGGCTTTT|TTT|AGACTCCGTCTAAGAAAAA
 >chr3:114442548-11
AAAAAGAAAAGAAGGAAAGAAACCCAAGTATATCTTTTTCTATGCAAAGGCTACTGGAATAAGCTTTTTATTATTTTATTGAGAGATCT
4442745 - E=6e-107
CTCACAATAATGTGAGGCTAATTTCTCTGAACAATGGCTTGTTTTAATAAATATTTTGCAAATACAGCTAATACACTGTGTGGCTGACT
