# Supplementary material for: Chromothripsis during telomere crisis is independent of NHEJ, and consistent with a replicative origin
Source: HighWire-hosted journal article supplement (doi:10.1101/gr.240705.118), 2019-03-14
Supplement: Supplemental_file_1.zip [file contig.2.DB106_length_561_mean_cov_8.41711229947.docx]

**DB106_length_561_mean_cov_8.41711229947**

TGGGTTTTCTTTAAATAGGGGCTCTCGATGTGGACAGC|GCTGGTCTGGAACTCCTGACTTCATATGATCCTCTTGCCTCAGGCTCCTG
 >chr17:56099357-56099730 + E=7e-204 p=0e+00
ATTCACTGGGATTACAAGTGTAAGCCACTAAACCCAGTAGTTTTTCTTAAGTCTTCAAACTCAACTTACAAATCTTGATAATTATTAAT

CTAATCCTATGTTATATAAGAAATAAGATTCATTATTTTTACTTGTTCTGTGATTAATATTCAACTAATACTTATTTTAAAAAATACTT

ATATGTAAAAAATTAAATCCCGGCCAGGCCACGGTGGCTCAC|GCCTGTAATCCCAGCACTCTGGGAGGCGGAAGCGGGTGGATCACCT
 >chr17:56107101-56107354 + E=2e-113
GAAATCAGGAGTTCAAGACCAGCCTGACCAACATGGTGAAACCCTGTCTCTACTAAA|AAATATAAAAATTAACCAGGTGTGGTGGTGG

GTGCCTGTAGTCCCAGCTACTTGGGAGGCTGAGGCAGGGAGAATTGCTTGAACCAGGAGGCGGAGGTTGCAGTGAGCCGAGATCGCGCC

ACTGCACTCCAGCCTGGGTGACAGAGCGAC
