# Supplementary material for: Chromothripsis during telomere crisis is independent of NHEJ, and consistent with a replicative origin
Source: HighWire-hosted journal article supplement (doi:10.1101/gr.240705.118), 2019-03-14
Supplement: Supplemental_file_1.zip [file contig.2.DB106_length_591_mean_cov_7.86125211506.docx]

**DB106_length_591_mean_cov_7.86125211506**

ATCT|TTCATTTAGCATTAGGTATATCTCCTAATGCTATCCCTCCCCTCTCCCCCAACCCCACAACAGGCCCCACTGTGTGATGTTCCC
 >chr8:133644002-133644167 - E=2e-65
CATCCTGTGTCCGTGTGTTCTCATTGTTCAATTCCCACCTATGAGTGAGAACATGCGGTGTTTGGTTTTTTTGTCCTTGCAA|AAAACC

T|TGATGGTTTCTAGTTTCATCCATGTCCCTGCAAAGGACATGAACTCATCATTTTTTATGGCTGCATAGTATTCCATGGTGTATATGT
 >chr1:83134234-83134648 + E=2e-222
GCCACATTTTCTTAATCCAGTCTATCATTGTTGGACATTTGGGTTGTTTCCAAGTCTTTGCTATTGTGAATAGTGCCACTATAAACATA

CGGGTGTATGTGTCTTTATAGCAGCATGATTTATAATCCTTTGGGTATATACCCAGTAGTGGGATGGCTGGGTCAAATGGTATTTCTAG

TTCTAGATCCCTGAGGAATCGCCACACTGACTTCCACAATGGTTGAACCAGTTGACAGTCCCACTAACAGTGTAAAAGTGTTCCTATTT

CTCCACATCCTCTCCAGCACCTGTTGTTTCCTGACTTTTTAATGATCGCCATTCTAACTG
