# Supplementary material for: Chromothripsis during telomere crisis is independent of NHEJ, and consistent with a replicative origin
Source: HighWire-hosted journal article supplement (doi:10.1101/gr.240705.118), 2019-03-14
Supplement: Supplemental_file_1.zip [file contig.2.DB106_length_675_mean_cov_8.66666666667.docx]

**DB106_length_675_mean_cov_8.66666666667**

CCCAGCCCTTAGAGATAGCTCCCATAAACTTTTCACCGAGTTCTATCTCTGCTATTCTCTCATTGCTAAAGGGACAAGGTGCTTCTTTT
 >chr13:98359146-98359484 - E=1e-191
AAATATGCTGTCTATGTGATTTCTCATGCAGTCCAACACTCTCTGCTTCCTAGTTCTGGGGAAGCTCTTGATGCTAGTTTGTGCACTCA

TCCTACTGCTGCAAATGAATGATTTTTATTTTGCCCTTGTCTCTCACTGCCAAGAAATATACTTTGCTGGCTCATGCATGATCCAGGGT

CACAGTCTTTTTCCCCCCTTCACTTTCTGCCACGTATATCTCCACTTGATCTCTGCTTTTGGCGGCC|TTTC|TCCATAGAACTTACAC
 >chr13:98153157-981
CCTTTAATGTACTACATTTTACTTATTTTAAGGAAAAATTTTGCCTCTATTCCTCTCTCTATTACACACACGTGAGAATATAAGTTCAT
53498 - E=2e-193
GAGGGCAGGAATTTTATTTTTGTCTTTTTGTTTACTATTGTATCTCCTATACCTGAAAGATTCCTTGACACAGAATAAGCACCTAATAA

ATATTTTTTGAATGAATGAATGCCTCAGAAGATGGTGTTTTCTCAGGTGAATATTTGACTTTCTCTCCCAATCCACCCACCTAGAAGCT

AGATCTCTTGAATGGCTTTGAGGTCTCACTCCTTTTATAGCAAAGGCTGAGAAA
