# Supplementary material for: Chromothripsis during telomere crisis is independent of NHEJ, and consistent with a replicative origin
Source: HighWire-hosted journal article supplement (doi:10.1101/gr.240705.118), 2019-03-14
Supplement: Supplemental_file_1.zip [file contig.2.DB106_length_700_mean_cov_13.9828571429.docx]

**DB106_length_700_mean_cov_13.9828571429**

CTCCCTCCCCTAGCACACCTAACACACCCCCCAAAATGAGGAAAACAAGAATTGTGCACCATCTTTAGAATGGTGCTGTAGCTGTCCCT
 >chr20:41816815-41817126 + E=3e-166
CTTCTCTCACTTGCTAATCCAACCTTTCAGCTTCACACACCTCAAAAGGAGTGTCTTCGTCACCCAACTTCCCAGCCAGGGAAACAGGC

TGTCCCTTCACAGAAGTCGCCTATTCCGCTTCCATTGTAGTACCAAGCAAGGAAGGCTCTAAAGCATTTCCAACGGAATGCCCCTCCAG

CGGCCCTTAACCTCAGACGCAGCTTGTGCAAAGACGCTGTACCT|G|AAAGAATGGGTTTCAAATGAACAGTAATACACACAATTGCTT
 >chr20:41753928-41754316 - E=1e-221
GAACATTTTTTCATAGTGAAAATAATGCTAGCATTTATCACATCAAAATTAAAATACAAGTTTTGCTCAAGCCAAGTCTAGATTTAAGC

AAGTTGGATGCTTATAGATGCTAACGTCCAGTCTAGCTATAGAGCATTTCTTTAGTCTTAGCTTTATTTTCTGAGTTTGAGAGTCTCTT

ACATGGGGGGAGCTTATTAACAGGGATTTTTCTATTGTGCAGTCAGTGAGAAATGAGGTCAAAAGTGCTTGTGTACAGGTATTCATTCA

TTCAGTGTGGGTGGTAGAAAGAGGGTGGAATTTGGCACCAGGAAGGTCAGAGTTCAAATCCCAAATCTGGCCCAGCACG
