# Supplementary material for: Chromothripsis during telomere crisis is independent of NHEJ, and consistent with a replicative origin
Source: HighWire-hosted journal article supplement (doi:10.1101/gr.240705.118), 2019-03-14
Supplement: Supplemental_file_1.zip [file contig.2.DB106_length_701_mean_cov_13.0527817404.docx]

**DB106_length_701_mean_cov_13.0527817404**

AGGACAGCTATAGGGGCCAAGAGTAAACCAGATATCCATTATCTTTATGTTTCTCAGTTCTGCTTTAAGAAAGAAATGTACCTAACCAA
 >chr4:169525413-169525713 + E=1e-168
AGGAAATGTCTCAATTTATCTATGAAACACACAACACCCAGAAAAATCTCATAAAATCTCATACATGGAACACGTAACATGGCCAGTTT

AACAATCGGCCAAACAATCTGCAAAAATGATATAACAGTGCCTGAATTTGAACATCTCTAGACATAACAAATAGAGCATAGTTACATTA

CCAGACTAACAACGCTTGATTAAGGCATAC|AGA|TGTTCAATCTCATTAAGTAATAAGAAAAATATGAATTAAAACAACAGAGATACC
 >chr4:169721656-169722060 + E=2e-231
ATTACACACCCATTTAATTGGCAAAAATTTAAGCCTGATAATACCAAGTTCTGGCAAGGATGTGAAGTAACAGGATATTTCATATACTG

CCAGTGGGAGTATAAATTGTTAAAAACCACGTTGGAAAAGAGTTTGGCATAATTTGATAAACTCAAAGTTATGCAAACTCTATGACCTA

GCAAACTTCACTCTTGAGTATATTTCTCAAAGAAATGCTTACATACGTGCACCCAGAGACACGTAACCCAAATGTACATAGCAGCCCTG

CTCATAATAACCCCAAACTGGAAATATTCCAGAAGTCCATCAACAGTAGAACAAGTAAGGAAATTGTGGTAGAGTAATTC
