# Supplementary material for: Chromothripsis during telomere crisis is independent of NHEJ, and consistent with a replicative origin
Source: HighWire-hosted journal article supplement (doi:10.1101/gr.240705.118), 2019-03-14
Supplement: Supplemental_file_1.zip [file contig.2.DB107_length_344_mean_cov_10.8895348837.docx]

**DB107_length_344_mean_cov_10.8895348837**

TGAGCTCTTTACTGGTGTGTATAGTAGAAAAGAAGAATGGCTTACTGGGCTCTCAGTAAATTGTTCCATAAAAGAAGACAGCAAATAAG
 >chr12:97329524-97329843 - E=2e-181
TCCTAACAGTAAAAATTCTAGCATCATAATAAAGGCTGACAGTGGGACCTTCCCTTGTAGTAACATTCATACTCCACATGATCTACAGA

CAGTGGTAAGCATCTTGAATACAACTGTATCACTCTTGCATTCTTTTGTTTTTGTTTTTGTTTTTTAGCTAACTAAGCATACCTAAATT

TAACAAGAAGAGGGTACAGTGGGCCCAAATGCTTAGAGGATTATGTACAC|CA|TATATATATATATATATATTTTTTT >chr2:140526443-140526470
