# Supplementary material for: Chromothripsis during telomere crisis is independent of NHEJ, and consistent with a replicative origin
Source: HighWire-hosted journal article supplement (doi:10.1101/gr.240705.118), 2019-03-14
Supplement: Supplemental_file_1.zip [file contig.2.DB107_length_365_mean_cov_4.93150684932.docx]

**DB107_length_365_mean_cov_4.93150684932**

CATTCATTCTAATGTTGTCTGTCATGTTTCATTCAAGTATTCTCTAAGCTGCTGCTGTGAACCTGACGCTGCTGAGCACAGGGACACAG
 >chr8:140869096-140869315 + E=2e-117
AGCTGACTCGGGCACACACCTCTGCTCCCGGGAGCACTGAGGTCTGAGAGAGGAAGCAGGGTGATAAGGAGCAACGGGACAGTCGGGAC

GCCCTGGGAATCTGGGCGGGGGGAGCTGGTTCAGACAGAGG|GGGGTGCCTGCCCTGCATTT|TGAAAGAGCAGAAAGGTGCCCAGGGC
 >chr8:140869315-140869441
ACTCCAGGCAGAAGGAAAGCATGTGTGAAGGCAGGGGAGTGTGAGAGTCCATGGTTTCCAGCAAGTGCACAGGGATCAGCACAGCAGAG
 + E=2e-64
GAGGGAGCGGT
