# Supplementary material for: Chromothripsis during telomere crisis is independent of NHEJ, and consistent with a replicative origin
Source: HighWire-hosted journal article supplement (doi:10.1101/gr.240705.118), 2019-03-14
Supplement: Supplemental_file_1.zip [file contig.2.DB107_length_434_mean_cov_5.29493087558.docx]

**DB107_length_434_mean_cov_5.29493087558**

ATCCTCTTCCGCAGAAGGAGTTAGTAAAGATGTGCCTCAACTTACAATGAATGGGGTTATGCCCCACTAATCCCATCATAAGTTGAAAA
 >chr3:122184037-122184245 + E=1e-113
TATTAAGTAAAAAGTACACTTAATACACCTAACCTACCAAACTTCATTGCCTAGCCTAGCCTACCTTAAACATGCTCAGAACACATACA

TTAGCCTACAGCTGAACAAATGATCTAACA|GATCTAA|CAGAACTCAAAGAAAGAAAATCACTGCAAATCTCATGAACATTAAAAGGA
 >chr3:122191575-122191794 + E=3e-108
CAATAAAATAATACTGGCCAGGCACAGTATACTGGCTCACACCTGTAATCCCAGCACTTTGGGAGGCCGAGGCAGGCAGATCACTTGAG

ATCAGGAGTTCAAGACCAGCCTGGCCAACGCGGCAAAACCCCGTTTCCACTAAAAATATGAAAATTAGCCAGGTGTGGTG
