# Supplementary material for: Chromothripsis during telomere crisis is independent of NHEJ, and consistent with a replicative origin
Source: HighWire-hosted journal article supplement (doi:10.1101/gr.240705.118), 2019-03-14
Supplement: Supplemental_file_1.zip [file contig.2.DB107_length_468_mean_cov_6.41025641026.docx]

**DB107_length_468_mean_cov_6.41025641026**

ATGGAAACCAACAAGTGGTTATATGCAACACAAAATGTCACCTAGGATGCCATGCTCTGCCCTCTAGGGAAAAACAAAGGGAACGAGGC
 >chr2:191860375-191860592 + E=5e-116 p=0e+00
TTGTGCCAGCAGTAGAAGCTTTGTTATTTGAGGAGTACAACTAACATGCACTGAATGATTACAGTCTACATCAAAAACTTCTACACACC

ACTGAGGCCTATGTGAGGAGAGATGGGTGGAGGCAGGGC|AAGAAACTAGTCTGAA|CTGGCAAGAAACTAGTCTGAACTGGTTCTTTT
 >chr2:191792235-191792470 + E=7
AAAAATGCAGTTTGAACTTTGCTTCTAAAGCTGTATATTAATTTTTGAGAGAGAGGCTTGTTTTCAAGGTTAATTTGTTACAAGATTAG
e-130
TAAGGAATAGAGATAAGGTCTACCAGATGTTCTTAAGAACTTGGAAGTTTGATTTATAGAACCTCATCCCTTCTGCTTTTAAGGCAATC

CAGTGTACAAGGTTAGTACAGTCTT
