# Supplementary material for: Chromothripsis during telomere crisis is independent of NHEJ, and consistent with a replicative origin
Source: HighWire-hosted journal article supplement (doi:10.1101/gr.240705.118), 2019-03-14
Supplement: Supplemental_file_1.zip [file contig.2.DB107_length_503_mean_cov_7.45526838966.docx]

**DB107_length_503_mean_cov_7.45526838966**

GATGGCTCGATGGTTGGGAGACAAGTGCTAGAGATGGGGACAACTGCCTCTTCGGTGACCTGTCAATAACAGCTGAAGGCAGCAGGGTC
 >chr8:140869925-140870174 - E=3e-135
CCTGGCCAGGCCACCTGGGTCCATTGCACCTTTTTTGGGGCTAGTTGCTCTCTCCACCTGCTGCTGGCTGTGTGCAGCTGTTGGCAGGC

AGCCCAGGGCACCCAGCCTCGTGCTTCCTGGTGAGCAAGTTGCTTTACAAGCAGTGGGCCGCCCAGGCA|GG|CTGCTGTTTTCCTATC
 >chr8:140858605-1
CATGGCCCACGACCAGGCCCCACCAGTTGGCACCAGCCTGTGAAACGCAGACTCATCTCTCCGAACTGACTGCCTCTGGCAGGACGAGG
40858861 + E=2e-142
TGAATTATCCTAAATCAAGGGGAGGCAGTGAATACATTATCTCAGGAATAAGAAGAAAAATGAAGATGGATATTTACAAACAACTCCTA

AAGAAATTCACCCCCACACACATATAATTTTAATGGTCTCTGAAAGAAAAGGCAACTCTT
