# Supplementary material for: Chromothripsis during telomere crisis is independent of NHEJ, and consistent with a replicative origin
Source: HighWire-hosted journal article supplement (doi:10.1101/gr.240705.118), 2019-03-14
Supplement: Supplemental_file_1.zip [file contig.2.DB107_length_511_mean_cov_7.63209393346.docx]

**DB107_length_511_mean_cov_7.63209393346**

CATCCCCAGCACACATTGGGCCAGACAAGGTGCTGCCCCTTGTCTGATTATTTTGTGTCATCACATCAAGTTTTCAAAGTAGGAATTTT
 >chr1:44502459-44502738 + E=2e-156
CTGTGTTTTCTAGAATGAGAGCTCAGGCAGGTTAACTAATTTGCTGCAGGTTATAGAACTAATAAGTGGTAGAACGTGAACTTGGATTC

AGGTTGGCCTGTGTCCAAAACGTGAACTTGAATTCAGGTTGGCCTGTGTCCAAAAGCTATTATTTCACCCCATGCACAATATACTAGGG

GGGATGTGCTGG|AAAAGTTGT|GAGTTGGAAAAGGATAGAGTTTATGGAGAGTAGAGAATGTTTGGAATAGCTGCTGAGCAAAGTTGA
 >chr1:44352778-44353001 + E=1e-122
GGGCCCAGCGCCTCATAAATTTGTGGTGGCATCAGTGCACTTTAGTGTATATGTGTGTGTGTTCTCGCAGCCCCTCAAGTATAAAAGGT

ACAACAGTGTAAGATTAGATAAATCTCTGGTTGGATTTTGCCTAATGTGTGGGACAAAAGAACAGTGG
