# Supplementary material for: Chromothripsis during telomere crisis is independent of NHEJ, and consistent with a replicative origin
Source: HighWire-hosted journal article supplement (doi:10.1101/gr.240705.118), 2019-03-14
Supplement: Supplemental_file_1.zip [file contig.2.DB107_length_562_mean_cov_7.20640569395.docx]

**DB107_length_562_mean_cov_7.20640569395**

AGAAAATTTGGATGCAGACAGGTACACAGGAAAAATGATGTGAAGACACAGGGAGAAGACCACTATCTACAAGTTAAGGAGAGTGGCTG
 >chr7:90426411-90426668 - E=5e-140 p=5e-02
GCACAGATCTTTCCTCATTGCCCTCATTTGGAGGGCCATGACACCTTACTCTCAGACTTCCAGCTTCCAAGACTGCAAGACATTAAGTT

TCTGTTGTTTAAGCTACCCAGGCTGTGGTACTTTTTTTCAGCAGCCCTAGCAAACTAACTGAGGTGGCTTATCTTATA|C|CAATACCC
 >chr7:90
TCTTTATATAACAAATATTTTACTACTTTTTTTGCCTTTACTACTATGAAATGGAATTCATATATAACAAGATACACATACATAATTTC
424606-90424912 - E=2e-172
AAATATTTATATATAAATATAATTTCAAATATATTAATTTATATCTATATGTAACTAATACAAAAAATAAATAAAAATTAATTTATAAT

AAAACAAAGTCTTTAAATATGTAAGTAGACACAACTATACCGGAACACACTGAAGAGTGGTGCTCACATCTATGTACAGAATCAGCATA

AGCACAACCACTACAAATGCAGACTGTGGG
