# Supplementary material for: Chromothripsis during telomere crisis is independent of NHEJ, and consistent with a replicative origin
Source: HighWire-hosted journal article supplement (doi:10.1101/gr.240705.118), 2019-03-14
Supplement: Supplemental_file_1.zip [file contig.2.DB107_length_563_mean_cov_6.91829484902.docx]

**DB107_length_563_mean_cov_6.91829484902**

TATATATTGTCTGTAACTACTTCTAAATAAGTTTTTGAAACCTTCCCCCCACCTTTAGTGAGTGGTATGTTTTTTATATTTAGAAACAA
 >chr12:97325795-97326266 + E=8e-265 p=0e+00
TCTCCCTCCTCCACAAACATGCAACATTCTTACACAATAATGTGGTATAAGAAAAAATAACATTGCTGCTTATACTGCCGGGATTTTTT

CCCCCCCATAAGCTTCTTGATTTAATTCTTTTCTTATAAATAATTTAGTCTGGAACAAGATAGGGAGTTAATGACTTAAGTGCTGCTGA

TACTGAAATAAGTTAATATTTATTTTAAATATAATTTGGAGGCCAGGTGCGGTGGCTCACACCTGTAATCCCAGCACTTTGGGAAGCTG

AGGCAGGTGGAGTGCTTGAGTCCAGGAGTTTGAGACCAGCCTGGGCAAAATGGCAAAATCCTGTCTCTTAAAAAAAAAAAAAAAAAAAA

ATATATATATATATATATATATATAT|A|TATATATATATATATATATATATAAAATGCACACACACAAGTAAATATATTTATATATAT
 >chr12:97326241-97326333 + E=1e-43
AAATTATATATATATAATTTAGTAAATCAGT
