# Supplementary material for: Chromothripsis during telomere crisis is independent of NHEJ, and consistent with a replicative origin
Source: HighWire-hosted journal article supplement (doi:10.1101/gr.240705.118), 2019-03-14
Supplement: Supplemental_file_1.zip [file contig.2.DB107_length_607_mean_cov_8.64909390445.docx]

**DB107_length_607_mean_cov_8.64909390445**

TGAAGTTGGATAAAATCCGAAGTAAAATGCAAGAGAGGAGAAACTGTGAATTAAATGAGATTGTCCTGAATTGACTGAGAATAAGATTA
 >chr7:133957487-133957704 - E=7e-119
ATTCTTTCACTTTGGATTGCACTTAAAATTAAAAGTTTGTGGCCTGAAGTATTCATACTCACCACAGATGCATTACCTAGCTTAATCAT

CACAAGACTCTTAATAAGAAATTCTGTTAGTTTTATAAA|C|GGGGCAGTGGCTATAATGAAGACTGTGTTAGTCTATTCTTGCATTGC
 >chr7:134020061-134020450 - E=2e-213
TATAAAGAAATACATGAGGCTGGGTAATTTATAAAGAAAAGAGGTTTCTGGCCAGGCACAGTGGCTCACGCCTATAATCCCAGCACTTT

GGTAGGCTGATGCAGGTGGATCACTTGAGCTCAGGAGTTAGAGACCAGCCTGGCCAACATATTGAAACTTCATCTGAACTAAAAATATA

AAACATTAGCTGGGCATGGTGGCATATGCCTGTAAGTCCAGCTACCGAGGAGGCTGAAGCACGAGAATTGCTTGAACTCAGAAGGCAGA

GGTTGCAGCAAGCTGAGATTGTGCCACTGCACTCTAGCCTGGGTGACAAAGTGAGACTCTGTCTCAAAACAAAAC
