# Supplementary material for: Chromothripsis during telomere crisis is independent of NHEJ, and consistent with a replicative origin
Source: HighWire-hosted journal article supplement (doi:10.1101/gr.240705.118), 2019-03-14
Supplement: Supplemental_file_1.zip [file contig.2.DB107_length_674_mean_cov_11.5727002967.docx]

**DB107_length_674_mean_cov_11.5727002967**

AAAATATAGTCAACCTCATCTCTGGACTAAACTGGAAAATGTAAGAGACAAGTTAAGTAGTACTTATGGAACTGTAGGCTCATTAGAGA
 >chr14:67515067-67515473 + E=1e-229
AACCTGTAGCATCAATTTGTGCCCACTTTAGAATAGCTTTAATCCTACAAATCTACTTAAGAAAAGTAAACCCATTGCAGGGGAATGCT

GTCAGTTTAGATGTTATAATAATTCAGTCTGTCACTCTTAGCTCCTTAGCTCAGTTCAGACAGCTATAGTGGGGAAGATGTCTAGACTC

CCTCCCCTACCTCTGCCCCAACTCTCAAATAAAAATCCTATATCCTAAAGAACCTTGTAGTTTATTTTTACCAAACAAGCTAGTCTACC

TGCAAATTAACAGTAACAGTGATATCACCAGGTAATTTTAATATTGTAA|A|GGTCCATACTGATGTTTGTTCTTGGCTCTGTTCCATC
 >chr14:67567528-67567797 + E=4e-150
TCACAGCTGCTGATGGCCCAGGAGATCGTTTCATCATTGGGGAATCCCAAGCTGGTGAACAGGTGAGATTGATAGGCCTGAAAGGCACT

GAAGATTTCAGCTTCATGGACTTTGGGCATCTAATTCTAAATTTCTCCTATCAGTTTAGTGGAAATTAGAGAGAGATTAGTCAGAAGAT

TATCAAAGGGATGAAAGTATAGTTCCCAGGAGAACCAAAAGAATTATTTCTTA
