# Supplementary material for: Chromothripsis during telomere crisis is independent of NHEJ, and consistent with a replicative origin
Source: HighWire-hosted journal article supplement (doi:10.1101/gr.240705.118), 2019-03-14
Supplement: Supplemental_file_1.zip [file contig.2.DB107_length_791_mean_cov_6.97850821745.docx]

**DB107_length_791_mean_cov_6.97850821745**

TTAATAGAAAAATTATTCTCAGGATTCTAGAAAAACCCAGATGGTATTCAGATACTATACACGCTGTTTTAAAAACTAAAAAGTGACTC
 >chr8:126131325-126131695 - E=1e-210
ATTTACTGTTTCACAAAGTGACATCCTAATGTGAATGGGAGAGCTTAGCAAACAGGGGAACACAGCAAGTAATTATTTCCACACACGCC

ATCATGTGGAGAAACCATGCCAACTTTCAGGTTGTTACAGTCGGTGGAGGAAAGAAAATCTGGAGGTGTTGGAATGATTGGAAATTTAT

GGAGTGAGATTCCACGGTAACAGGAGGTGAGATGAGGTGAACAGCAGCCAAAACTTTCCTCTCAATAGCTCTTAAAAAGGAAACTACTC

AACTTTCTGAGTAA|TAA|TCCCGAATAGTTGGGATTACAGGCACACACGTCCACGCCCAGCTAATTTTTGTATTATTAGTAGAGACAG
 >chr8:126392764-126393182 - E=1e-221
GGTTTCACCATGTTGGCCAGGCTGGTCTCAAACCCCTGACCTCGTGATCCATACGCCTTAGCCTCCCAGAGTGCTGGATTACAGGCGTG

AGCCACTGCACCTGGCCCTAGACATATATTTTCAATAGCTGTTTTAATATTTTCATCTACTAATTCTGTCATCTATGTCTATTAATATT

ACACAAATCTTCCTTTTATTATGGATTATATTTTCCTGCTTATTTGCATAGCTGGAACTTAAAAAAAATTTTTAAATTAGGTTATTACT

TTTTTAGAGACAGGGGCTTGCTATGGTACCGATGCTAGAGTGCAGGGGAATGATCATAGGTCACTGCAGCCTAAAACTCCT
