# Supplementary material for: Chromothripsis during telomere crisis is independent of NHEJ, and consistent with a replicative origin
Source: HighWire-hosted journal article supplement (doi:10.1101/gr.240705.118), 2019-03-14
Supplement: Supplemental_file_1.zip [file contig.2.DB107_length_795_mean_cov_10.4691823899.docx]

**DB107_length_795_mean_cov_10.4691823899**

TAACATGTAATAGGAAAATTATTAATGAGATATTTTATGTTCTTTACATTGGACCAGGTTTTTTGAAATATCAAGTGTGTTTTACACTT
 >chr10:32214623-32214843 - E=2e-120
AGAGCATTTCTCAATTTGCATTAGGCACATTTGACTAGTGACTGCTGTATCGAACAACAGTTTTGGAGTCTAAAAGTGTAGACCAATGT

TACTCTTAGTGTATTTTCAGATTGGCCTCATCAGCAATCCTT|TGTGATGTGATAAAAATCCTTTTTATCCTGGGATATTCA|CTTTCC
 >chr1
TGGTAGACCTTCTACTTCTAACTTTCCTTTCTGCCTCCATCACTTAGTCTGGTTCTTTAGTTATGTTAATTGCAATAATAATTATTATG
0:32154649-32155098 - E=3e-243
CTAACAATAGAAATCACTATGCAAGATCATATGCTGACTTTAAACTTATGTTCTCATTTTAATTCATAAAGCAACAGCTTAGTATTTTC

CAGGGTTCTCATTTCATCTTGCACTTACTCTGTATGCTTTCATATGTTATTGACCCCACGTGTATATTAATGACTTCTATATTTTTAGC

CCTGATTTTTTTTTTTTTGAGACGGAGTCTTGCTCAGTCGCCCCGGCTGGAGTGCAGCGTCGCGGTCTTGGCTCACTGCAAGCTCTGCC

TCCTGGGTTCACGCCATTCTCCTGCCTCAGCCTCCGGAGTAGCTGGGACTACAGGCGCCCGCCACCACGCCCGGCTAATTTTTTT|GTT

TTTTTTGGAGAGGCGGGGTTTCACCGTGTTCGCCAGGGTGGTTTGTTATTGTTCACCGCGGTATGCGCCCCTCAGAGCGGGAGCGT
