# Supplementary material for: Chromothripsis during telomere crisis is independent of NHEJ, and consistent with a replicative origin
Source: HighWire-hosted journal article supplement (doi:10.1101/gr.240705.118), 2019-03-14
Supplement: Supplemental_file_1.zip [file contig.2.DB108_length_389_mean_cov_12.9588688946.docx]

**DB108_length_389_mean_cov_12.9588688946**

TGCGTGGTGGGAAGTAGGGGGGGGAGGTGAGGGGTGGGGTCTTCCGGTCG|TGTGGAAGGTGAGTGTGAGAGA|TGGGTGTGGAAGGTG
 >chr16:81702774-81702829 - E=1e-18 p
TGAGGTGGGTGTGGAAGG|CCGTGAGTGTGAGGTGGGTGTGGAAGGTGTGAGGTGGGTACGGAAGGCAATGAGTGTGAGGTGGGTGTGG
=0e+00 >chr16:81702276-81702589 - E=8e-120
AAGGCAGTGTGAGGTGGGTGTGGAAGGCAGTGAGTGTGAGGTGGGTGTGGAAGGCAGTGAGTGTGAGGTGGGTGTGAATGGATGTGTGT

TTGTGACAGGCTGCTGTGGACAGAGGCATACATGTGCAATGAGGAGTTGGGCACCAGGCATTAGTGGCAGGGGAGGCACTGGCACGTGT

CACTATGATGAGGGGACAGGGACACGACCCTGG|GTG
