# Supplementary material for: Chromothripsis during telomere crisis is independent of NHEJ, and consistent with a replicative origin
Source: HighWire-hosted journal article supplement (doi:10.1101/gr.240705.118), 2019-03-14
Supplement: Supplemental_file_1.zip [file contig.2.DB108_length_427_mean_cov_8.38173302108.docx]

**DB108_length_427_mean_cov_8.38173302108**

CGCTAGGGAAAGCAGCGCCTGCACCAGGCCCCCGGAACTAAAGTGTCCACTGCGGGGCTCTGTCAAGGGGCCAGGTCAAGGACACAGGG
 >chr16:81702104-81702255 - E=2e-79
ACACTGCCTGTGCCGGCTGAGGGCCATATGTGGTGGCTGCCGTGCTCGGCCTCTTCCAGGTG|GAAGA|GGTCCTCTTGCTTTGTGCTG
 >chr16:81655531-816
TGGGGCCAAGTCTCAGAAGCTGAGCTGAGTCTCCACGTTGGGTTGCAAAGGGGAAGAGAACTAGTGTTTACTGAGCTTCTACTGTGTGC
55802 + E=1e-151
CAGGACTGGCGTGTTTTGAGCTCCTACTGTGTGCCAGGAGCTCTGCTAGTCTCATCATGTCCATTTCACCCTCACCACAACCGCATAAG

GTTGATGATTATCGTTGTTGCCATTTTCCATACGGGAAAGATGAGGCTCAGACTGGAGTCCAAGCTCCCATCG
