# Supplementary material for: Chromothripsis during telomere crisis is independent of NHEJ, and consistent with a replicative origin
Source: HighWire-hosted journal article supplement (doi:10.1101/gr.240705.118), 2019-03-14
Supplement: Supplemental_file_1.zip [file contig.2.DB108_length_581_mean_cov_8.51979345955.docx]

**DB108_length_581_mean_cov_8.51979345955**

ATGTACATGATGTTGATATTGTATTACTGGTCATTTTAACTTTGATCCTTTAGTTAAGGCGGCATCTTACAAGTTCCCCTTAAAAGTCC
 >chr7:40909525-40909840 + E=7e-178
TGGGTTTGCTTTTGTTTGTTTCTGTAATCAGTAAGTATATTTTGGGGAAATATTCTGAGACTGTACTAGTTCACTTCAGCAACTGTAAC

AAATTACCACACTCATGATCATGTAAAACAATAGAACTTAATTCTCTCAAAATTCTAGAGGCCAGAAGTCTTTGGATTTCATTCTGATC

AATGTCATTGAACTGAAAGAAAAGTGTTACATGGCTGTGCTCTCTGTG|TTATCTGTCATAGATAA|CATAGATAACACTGTAACAGCT
 >chr7:40800978-408012
TAATTATGGGAAATTAGAGAGGGGCCCATGATAGAGCACAGCATTTCCTAAATGTTCCTTGCCTAGAGGACCCTAGTTTTCTGAAATAG
27 + E=4e-138
TAATAGTTGTCCCACCACAAAATGACCCTTTTGTCAAACAACTTTGGGAAACCTGCATTAGGCAAAGGTCAGTGAATTTTCTTTACTTT

GACATTTCTCAGAAGCATTGATAGTCTGAAATGTGTTTGCCTAAGAGGG
