# Supplementary material for: Chromothripsis during telomere crisis is independent of NHEJ, and consistent with a replicative origin
Source: HighWire-hosted journal article supplement (doi:10.1101/gr.240705.118), 2019-03-14
Supplement: Supplemental_file_1.zip [file contig.2.DB108_length_607_mean_cov_8.07578253707.docx]

**DB108_length_607_mean_cov_8.07578253707**

GAACATAAACACAGAATCAGGGTCAAAGGAGATTAGAAAATGTTCCATTCCCATCCATTTTAATTAACACCTAAAGAATAATTTTATTA
 >chr11:128857527-128857847 + E=7e-181
TAATGCAAATTTCCTCTCTCATGGCTGTCATCGGTTCAAACTCAATTTGTTAAAATCTTCAAACACTATAAAGAGGCAAAATACAAGTA

CTGAAGAGATTAAGGTGCATGGTTCTCTGATACTACAGATGAAAAAAATGCCATTTAGAAAAGTATACAGAGACAATAACATGTATATT

ATTTCCTATTTTATCTAAATTATCTTTAATGAAAATAGGTTATCAAAGTAAG|T|ATAATTTTGTTTTTTTTTGAGACGGAGTCTCACA
 >chr4:34078768-34079056 + E=1e-155
CTCCCGCCCAGGCTGGAGTGCAGTGGCACAATCTCTGCTCGCTGCAAGCTCCGCCTCCTGGGTTCACGTCATTCTCCTGCCTCAGCCTC

CCGAGGAGCTGGGACTACAGGCACTGGCCACAATGCCTGGCTAATTTTTTGTATTTTTAGTAGAGACGGGGTTTCACCATGTTAGCCAG

GATGGTCTCGAACTCCTGACCTCGTGATCCGCCCACCTCAGCCTCCCAAAGTGCTGGGATTACAGGCGTGAGCCA
