# Supplementary material for: Chromothripsis during telomere crisis is independent of NHEJ, and consistent with a replicative origin
Source: HighWire-hosted journal article supplement (doi:10.1101/gr.240705.118), 2019-03-14
Supplement: Supplemental_file_1.zip [file contig.2.DB108_length_631_mean_cov_8.77020602219.docx]

**DB108_length_631_mean_cov_8.77020602219**

GAGGCTGAGACAGGAGAATTGCTTGAACCTGGGAGGCAGACTTGCAAGAGCCGAGATTATGCCATTGCACTCCAGCCTGGGCAACAGAG
 >chr17:57586346-57586716 + E=4e-200 p=0e+00
TGAGATTTTGTCTCAAAAAAAAAAAAAAATCAGGTGTCCTCAACCTCTAGGCCATGGACCAGTCCACAGCCTGTTAGGAACAGGGCTGC

ACAGCAGGAGGTGAGTGGCAAGCAAACAGGAGCGAGCATTGCCACCTGAGCTCCGCCTCCTGTTAGATCAGCAGCGGCATTAGATTCTC

ACTGGAGCACAAACCCTATTGTGAACTGAGTATGCAAAAGATCTAAGTTGCAGGCTCCTGATGAGACTCTAACTAATGCTTGATGTACT

GTACTGCC|GGCAGGTTGCAGTGAGCCCAGATTGCATCACCACTGCACTCCAGCCTGGGCAACAGAGGGAGACTCTATCTCAAAAAAAA
 >chr17:57762095-57762365 + E=2e-140
AAAAAATCTTGCCCTCCAAATTAGAAATATTGTCCATTTCATAGCCATATGTTAGTCCTTGATAGTGAAAATCTTGGAGAAAATGGTAT

CTTTAGGTAAAATGAAAAATCATACCTTTTGATGCTTGAATCTAGGTGTCATATTACATGTTACCATCTAAGGGGCTCATTGATTGAGA

ACGGAATAT
