# Supplementary material for: Chromothripsis during telomere crisis is independent of NHEJ, and consistent with a replicative origin
Source: HighWire-hosted journal article supplement (doi:10.1101/gr.240705.118), 2019-03-14
Supplement: Supplemental_file_1.zip [file contig.2.DB108_length_647_mean_cov_9.43894899536.docx]

**DB108_length_647_mean_cov_9.43894899536**

GAGTGCAATGGCGTGATCTCAGCTCACCGCAACCTCCACCTCCCGGCTTCAAGCAATTCTCCTCCCTCAGCCTCCCAAGTAACTAGGAT
 >chr16:81857787-81858222 + E=5e-235
TATAGGCATGCGTCACCACACCCGGCTAATTTGTGTATTTTTAGTAGAGACAGGGTTTCACCACGTTGGCCAGGCTGGTCTTGAACTCC

TGATCTTAAGTAATCCACCCACCTCAACCTCCCAAAGTGCTGGGATTACAAGCGTGAGCCACTGCACATGGCCCCAGCCACCTCTTTTC

TTGTGATTTGTCAGCAAACAGCCTCTGGGGTTGTGACTGCTGGAAAGCACCTCCAGCTTTTGTGGAGCCAGGTGTGGCTGGGACTTTTC

GTTGGGATCATGTTTGGATCTCCCTCAGGCCTTCTCACCATGTTCCTCGTGTGCCACACTGGTGAGATAACGGGGTGTG|AAATTATAC
 >chr16:
GGGCTCTGCCATCTCCTGCCTTCAACTCCCTAGGCAGAGACGCAGGAAGGAGGAGGCGATTATGATACATTTGCTACAAACCTCAAAGA
81691517-81691729 - E=8e-116
CAGACAATTACACTCCCGCTCCTATCAACTGGGGCTCTGAAATATGCAAAGGCAGAGGGAGGTGCGTCCGGCTTGCTAGAAAAGACAAA

ACGGAGCAAGGCCAGATGCTGGTGG
