# Supplementary material for: Chromothripsis during telomere crisis is independent of NHEJ, and consistent with a replicative origin
Source: HighWire-hosted journal article supplement (doi:10.1101/gr.240705.118), 2019-03-14
Supplement: Supplemental_file_1.zip [file contig.2.DB108_length_663_mean_cov_9.39366515837.docx]

**DB108_length_663_mean_cov_9.39366515837**

GGAGTGGTGGCTTCTGGCACTTTGGAAGACTGAGGTGGGAGGATGCCTTGAGCCCAGGAGTTCAAGGCTGCAGTGAGCTGTGATCATGC
 >chr17:16264058-16264355 - E=1e-159 p=0e+00
CACTGCACTCTAGCCTGGGTGACAGAGTTAGACCCTGTTTCAGAAAAAAAAAAATAGATGTTATGATTTAGCAAGTCTTATCAAAACCT

ACCCAAACTCAATGTATGTTACTAAGAGGGTATAATACAGATGATGAAAATATTTTCCAAAGGACCCAAGAAAGCATATAAGATCCTGT

GATAAGTGTTTTGAGTTTATTCTGTTT|ATGTTGTGTT|GCCTGGGCAACACAGCGAGACTCTGTCCCCCACCCCCACCACCCACCACC
 >chr17:16307412-16307772 - E=5e-197
GCAAACACACACACAAAAACTGAAATAAAAACTGAAATTGAAAATTGGAAAACACTGCATTAAACAATGTTAAACCAGTTCCTATAAGC

TAGAACTCCTTGTTAGCTAGGCATGGGAGTGCATGCCTGTAATCTCAGCTACTCAGGAGGCTGAGGCAGGAGAATCACTTGAGTTTGGG

AGTTGAGGCTGTAGTAAACTATGATTGTTCCACTGCACTCCAGCCTGGGTAACAAGGTGAGACAGTCTCTGAAAAAAACAAACAAGCAA

ACAAAACAACAACAACAACAAAACACACAAAGAAAATAGGAT
