# Supplementary material for: Chromothripsis during telomere crisis is independent of NHEJ, and consistent with a replicative origin
Source: HighWire-hosted journal article supplement (doi:10.1101/gr.240705.118), 2019-03-14
Supplement: Supplemental_file_1.zip [file contig.2.DB108_length_671_mean_cov_8.49478390462.docx]

**DB108_length_671_mean_cov_8.49478390462**

AGCAATGTTTTCACAGACCATTACTATTCAGCTACTCACTGCCTGTAATAGTAGCTAAATCGTATCTGAGATTTATTCCAGCTCTCAAA
 >chr2:35537923-35538231 + E=1e-173
ATATAAAAAGTCTAAGATAATTGCAATATAGTTTTAAAAAATCTTTAAAACAAATAGAACAAGGAAGAACAATTAATGTTTTAGTCAGA

GTCTTGGATCATTAATACTCTTCATGAGTAAATTCATAATTTGTTCTCCACCATGAGAATTATTCAGAGAGAAATTTCTTAAATCTGCC

TGTGGCACACACTGGCTGAAAGGGATAATAAATTCA|TGAAA|AATAATGATAGCATGAAGATACACATTTAACTAATTTATAATACAG
 >chr2:35540283-35540651 + E=1e-209
ATTTAGTAGAGTCTTAAAATCTATGGTAGTCAAAATATTGCTTCCATTTCCTTATGTCTGTTTCTAATCTGTAGGAACACATCAAAAAG

ATGTCAAAAAGAAAGCAACTCATGAAAGTGGCACTGGGAGCCACCCTTTGCACAATTCCAACAGGTTCTTGGAGAAGACTTTATTAGGA

TGAAGTGCCAGGGTTTAGATTTGTATTTATGTATTGACTCAATAATTCACTCAATACATGCTTTGACATGTGTAATAGTTCCTCTTCCT

TAACAATGTACTGCTCCAAAATTAGTTTATGAGGACTGAAGTCAACATGT
