# Supplementary material for: Chromothripsis during telomere crisis is independent of NHEJ, and consistent with a replicative origin
Source: HighWire-hosted journal article supplement (doi:10.1101/gr.240705.118), 2019-03-14
Supplement: Supplemental_file_1.zip [file contig.2.DB108_length_717_mean_cov_6.83821478382.docx]

**DB108_length_717_mean_cov_6.83821478382**

CCCCGCAACCCACCCTGGAAAC|CAGAGCAAGCCACCAAGAAAATCAAAATAAAAATAAAAATAAATAAATAAATAAATTTCTCCTTCT
 >chr16:81751730-81752021 - E=3e-148
CAAATGGGTATCAGTCATATTAAACTTGTGCTCACCCTAATGATCTCACTTTAATTTGATCACCTGTGTAAAAACCCTATTCCCAAATA

AAGTCGCATTCTGAGGAACTGCAGTTTAGGACTTCAATGTCTCTTTTCTGGGGGATACAATTCAACCCTGACAACCGTACACCCCCAAG

CCCATCACACTTCCCACTGGCCGTTCCCAGCCTATATCCGGCTCTGG|AAGACCGGATATA|GGCACAAAGAAAGTTATCATGGATGCA
 >chr16:81730437-81730795 -
GCTATTGGTTTGGTGACCTCAGACCCCTCATGATAGTGGGAACAATCCCCCTGACCGCGACACCTCCTTGTAAGGATTAAACAAGCTGG
 E=1e-200
TGGACCTGCAGTGCCTTCCAGAATCCCTGGTCCCGTTGGGCACTCAATTTCTTGTAGGAACATAACCATGGCAATGAACTGTGTGACCT

TAGGCAGTGACGGCCCAGGCTTTAGCTGCCTTGGGTATAAAATGGGGCAATGACATGTGTCGTCTTCTCACTGTGCTGTGAGAGCTGAG

TGCAACTGGGAAAGCCAAGTGCTTGGCTTGGAGCCTCAGATAAGAAATGAGTAAGTGACAGTCA|AGATCGGAAGAGCGTCGTGTAGGG

AAAGAGTGT
