# Supplementary material for: Chromothripsis during telomere crisis is independent of NHEJ, and consistent with a replicative origin
Source: HighWire-hosted journal article supplement (doi:10.1101/gr.240705.118), 2019-03-14
Supplement: Supplemental_file_1.zip [file contig.2.DB109_length_309_mean_cov_2.90938511327.docx]

**DB109_length_309_mean_cov_2.90938511327**

AAGGAGAAAAATGATAACCACATGCATTTCATGATCCATAGCAATTCTGAAACAAAATTGGGCAAATAGGTCATATTTTCCAGTTTCAG
 >chr21:23625931-23626205 + E=3e-154 p=1e-03
GGGAAAGCATGCTCCCTGACGAAGCCATATTCCTTTTCCAGTGAGCGACTTCCCATATTTCCTTCATGTTCCCTGGCTCTACCCTCTGA

GATATCCTTTATTTTTTTTCATCCTCCTTAGATATTTCTGGAGAGTTCAAAGGATAATATTTTCTTACAGAAATTTTCTTAACCTAT|T

TTCTTTTC|TTTTTTTTTTTTTTTTTATAAAGGA|AAGATGTTTA>chr7:112193172-112193206 - E=5e-03
