# Supplementary material for: Chromothripsis during telomere crisis is independent of NHEJ, and consistent with a replicative origin
Source: HighWire-hosted journal article supplement (doi:10.1101/gr.240705.118), 2019-03-14
Supplement: Supplemental_file_1.zip [file contig.2.DB109_length_370_mean_cov_7.02702702703.docx]

**DB109_length_370_mean_cov_7.02702702703**

AATAGACCAATCTATAGAGATGGAAAGTTATTTAGTGATTGCCTAAAGGTGGGGTTCAGAGTGGAGAATGGAGAGTAACTGCAAATGGG
 >chr2:124502015-124502310 - E=2e-166 p=0e+00
TGTGATACTACTTTTGTAGTGATGAAAATGTTCTAAAATTAGATTGTAGTGATGGTGGCATAAATCTATAAATATGCTATAATCCATTG

AATTTTATACTTAAAATTTTAATAGGAAAATTATATATATACATATATACACACACACATATACATATACGTATATGTGTATATATATG

TATATGTG|TATATATATGTATATGTATA|TATATGTATATGTATATGTATATGTATATGTATATATATATATGTATATGTATATGTAT
 >chr8:106342777-106342870 - E=1e-24
ATATATATATATGTAT
