# Supplementary material for: Chromothripsis during telomere crisis is independent of NHEJ, and consistent with a replicative origin
Source: HighWire-hosted journal article supplement (doi:10.1101/gr.240705.118), 2019-03-14
Supplement: Supplemental_file_1.zip [file contig.2.DB109_length_440_mean_cov_5.44545454545.docx]

**DB109_length_440_mean_cov_5.44545454545**

TGGAATATATTAGATCAATGGCTTAAATGAGAGATCCTTTGTTAAGACTTCTGAAAGAATAAAATCAGTACTTCTTAGTAACTCTCAAT
 >chr21:23626190-23626547 - E=1e-194
TAGACAAAATTCACCATTTTGAAGATTTGCCCCTCTGAAAACTAAATGCCCAATGTATCAGTTAATACATTGAGAGACAATTACTCAAA

AAGAATTTCTGATGTGTCTTTCGAGTTACAACTCTTAGAAATCAGACTCATAGATAATTTGCCAAGTGTTTAATGGAGTTATGCCCAGA

AACAAGTTGGCAGTCTTTATCGAAAGGCACTGAGACTGTTCAAACTCCAAAAATTCTCTGATTCCACATCTTTATGAAAAGAAAATAGG

T|GGGAGGAGCCAAGATGGCCGAATAGGAACAGCTCCGGTCTACAGCTCCCAGCGTGAGCGACGCAGAAGACGGTTATTTC|CGCA >chrX:118575377-118575456 - E=5e-33
