# Supplementary material for: Chromothripsis during telomere crisis is independent of NHEJ, and consistent with a replicative origin
Source: HighWire-hosted journal article supplement (doi:10.1101/gr.240705.118), 2019-03-14
Supplement: Supplemental_file_1.zip [file contig.2.DB109_length_537_mean_cov_5.74301675978.docx]

**DB109_length_537_mean_cov_5.74301675978**

TCTGATCTTGTGGCCCCTATCCAGGAACTGACTAAGCACAAGAAGACAGCTTCAACTCCCTATGATTTAATCTCTGACCAGTCAGCACT
 >chr7:129864966-129865225 + E=3e-141
CCCGGCTCACTGGCTTCCCTGCACCCACTAAGTTGTCCTTAAAAACTCTGATCCCCTGGCCAGGTGCAGTGGCTCACGCTTGTAATCCC

AGCACTTTGGGAGGCCAAGGCGGGCAGATCATCTGAGGTCAGGAGTTTGAAACCAGCCTGACTAACATGGTGAAATCCTGT|TTC|AAC
 >c
AAATTGAAGGATGGTAAATGTGGGGAATTTTACTGCTGATGAAAGTGACTCTCAGTGAGAAGGGGAGCTGAATAAGGGATGGGGTGGGC
hr7:129871894-129872169 + E=7e-151
AGGTAATTTTCCCCTGGAGTCTGGCCATCTCTGGCTGGATTCTTCTCTGAAATTACACTGTCAGACTGTCCCTCTGAAGTCAAGCTGCT

TCTCTCCAACATCCAACCATAGTCCCTGAGGTACAGCTGCTTCTCAGGGATTTTTATGGGCACAGGATTTGGGGTAGGGCAGGCCATGG

GTAGT
