# Supplementary material for: Chromothripsis during telomere crisis is independent of NHEJ, and consistent with a replicative origin
Source: HighWire-hosted journal article supplement (doi:10.1101/gr.240705.118), 2019-03-14
Supplement: Supplemental_file_1.zip [file contig.2.DB109_length_587_mean_cov_9.33049403748.docx]

**DB109_length_587_mean_cov_9.33049403748**

CAGCTCAGGGATCACCTTAAAAGGACAGCCTTCCTGTCTTCCAGGGCCAAATCGGTAACTCCCTCTTCAAGCGCTGCCTAAGCACTCAC
 >chr6:4774840-4775116 - E=2e-148
GCGTGCTCACTGCAGCACTCGTCTCTGTATTTTAAGGTTTGTCTACTCTTCACCCCACCCCAACTCCAAACGATGACCTTCAGTCAGAC

TTCATCTTCAAATTTGACGCTGGCCCCTAGCACCATTCTCTATACAGGAAATAAGGTGTTGTTCAATGAATGGAATTTCAGTGTCCACG

AGAAA|GCCC|TGGGGAGGGCGCCCTTGCCCTGCACATGCCACTGCTCCAGTGCGTCTGTCCTGGGAGGGGAACTCACTGGGATGTCAG
 >chr6:5215172-5215488 + E=1e-173
ATGAGGGCCAGTTTAGTATTTTTTTTTTTTGCAAGGGTAGTTTGAGCATTTCAAACCAAGAAGTGACACAGACAATTAGATATAGCGGG

AGAAATGATGGCACAGATTATTTACAATCCCCCTTTTCTAGGCAGTTTATACTCTGGATAATTTTACGCTAAAGATAAAACCTGCCTGT

TTTGCCAACCTCTACACAGAGTAAGTGCCAAAGAACAAAATCTTTCTGAGTTTAT
