# Supplementary material for: Chromothripsis during telomere crisis is independent of NHEJ, and consistent with a replicative origin
Source: HighWire-hosted journal article supplement (doi:10.1101/gr.240705.118), 2019-03-14
Supplement: Supplemental_file_1.zip [file contig.2.DB110_length_381_mean_cov_33.8320209974.docx]

**DB110_length_381_mean_cov_33.8320209974**

GGGATCATTGTAGAGATATGTCTCAATCCCCCTGTGGGCACAGCCTAGACAACAGTTACATCACCTCTGTTAACAGTGCAGAGATATGT
 >chr18:108130-108223 - E=2e-32 p=0e+00
CAAA|CACAATTGTTTTGTGATATGT|CTACACAATTGTTACATCACTTAGGTGAACAGGGCAGAGATATATCACAATAACCCCTTTAA
 >chr18:107857-108111 - E=2e-105
GCAGAGCGTAGACAAGAGTTACATCACCTGGGTGATCAGTGCAGAAATATGTGACAAGGCCCCTTTAAGCAGAGCCTAGAAAATAGTTA

CATCACCTGAGTGATCAGTGCAGAGATCTGTCACAATGCCCCTTTAGGCAGAGCTTAGACCAGAGTTACATCACCTGGGTGATCAGTGC

AGGGATATGTCACA|AAGCACCCTGTAG
