# Supplementary material for: Chromothripsis during telomere crisis is independent of NHEJ, and consistent with a replicative origin
Source: HighWire-hosted journal article supplement (doi:10.1101/gr.240705.118), 2019-03-14
Supplement: Supplemental_file_1.zip [file contig.2.DB110_length_436_mean_cov_6.70412844037.docx]

**DB110_length_436_mean_cov_6.70412844037**

CCACACGGTTCAGGCATTTATTGATTTATGCATTGGAATTGTTTCCTTCATCAGGCAATACATTCTGCGACCGGGTTTTGCATATGTGC
 >chr2:2267025-2267225 - E=7e-109
AGCACCCCTTGTTTCTGGGATGTAAGCAGAGGGCGTCGTTAACCCTGGAGCTGGGAGGTGATTGGCCCTCCTCGCTCTCTGCCAGTAGG

GTTCCCCTTCTCTTCCATTTTC|C|GACTTTGGGCGGGCTAGAAAAGCTCCAACCAGCTGCAAAGACAGGTCAGATGTTATAGCTGCAG
 >chr2:2266315-2266554 - E=6e-121
GAATCATAATTTTTTTTTTTTTGAGATGGAGTCTTGCTCTGTCACCCAGGCTGGAGTGCAGTGGCACGATCTTGGCTCACTGCAAGCTC

TGCCTCCTGGGTTCATGCCATTCTGCTGCCTCAGCCTCCTGAGTAGCTGGGACCACAGGTGCCAGCCACCATGCCCGGCTAA
