# Supplementary material for: Chromothripsis during telomere crisis is independent of NHEJ, and consistent with a replicative origin
Source: HighWire-hosted journal article supplement (doi:10.1101/gr.240705.118), 2019-03-14
Supplement: Supplemental_file_1.zip [file contig.2.DB110_length_502_mean_cov_14.03187251.docx]

**DB110_length_502_mean_cov_14.03187251**

CAAAATAACAGAAATCATAACAAACAGTCTCTGAGACCACAGTGCAATCAAATTAGAACTCAGGATTAAGAAACTCACTCAAAACTGCA
 >chr3:173102706-173102998 + E=3e-164 p=4e-02
CAACTACATGGAAACTGAACAACCTGCTCCTGAATGACTACTGGGTAAATAATGAAATTAAGGCAGAAATAGATAAGCTTTTTGAAACC

AATGAGAACAAAGACACAATGTACCAGAATTTCTGGGACACAGCTAAAGCAGTGTTTAGAGGGAAATTTGTAGTGCTAAATGCCCACAG

GAGGAAGCAAGAAAGATCTAAA|ATT|TTTAAATTCTTTTTGGCAGTTTGTATATCCTCATTTACTTGGAATTAACTACTGGGAAATTA
 >chr3:173068001-173068210 + E=4e-111
CTATGTTCTTTTGGTGATGTTTTGTCTCTTTGGTTTTTCATGTGTCTGGTTGCCTTTTACATTGATGTCTGCATGTTTGATGTATTCCA

GTCACCTATTCCAAAGTTTATGGACTTGTTTCTCTGTAAAAAGTCCTTTCCCAAA|CGAG
