# Supplementary material for: Chromothripsis during telomere crisis is independent of NHEJ, and consistent with a replicative origin
Source: HighWire-hosted journal article supplement (doi:10.1101/gr.240705.118), 2019-03-14
Supplement: Supplemental_file_1.zip [file contig.2.DB110_length_556_mean_cov_10.4676258993.docx]

**DB110_length_556_mean_cov_10.4676258993**

CGGAAACAATTACAGAAGTTGCTTGACATCACAGGCCAGCCTGTCTGCACCAGTCTCTACTGTGCCCATACCATCAGTCTGAACTGCCC
 >chr11:68196395-68196838 - E=4e-252 p=0e+00
ACTTGTCTCTCCTCCTATTTACTTACTTTGAGACAGGGTCACACTCTGTCACCCAGGCTGGAGGGCAGTGGTGCGATCATGGCTCACTG

TAGCCTTGATCTCCGTGGGTCGAACAACCCTCCTGCCTCAGCCTCTTGAGTAGCTGGGACTACAGGCATGCACCACCATGCCTGGCTTT

TTTTTTTGAGACAGAGTCTTGCTCTATCGCCCAGGCTGGAGCGCAGTGGCATGATCTCGGCTCACTGCAAACTCCACCTCCCGGGTTCA

TGCCATTCTCCTGCCTTAGCCTCCCAAGTAGCTGGGACAATAGGCACCTGCCACTGTGCCTGGCTAAT|TTTCTTTTTTTTTTTTTTT|
 >chr18:74485167-744
GAGACGGAGTCTCACTCTGTCACCCAGGCTGGAGTGCAGTGGCATGGAGCGATCTCGGCTCACCGCAAGCTCCGCCTCCCGGGTTCACG
85294 - E=4e-46
CCATTCTCCTGCCTCAGCCTCCCG
