# Supplementary material for: Chromothripsis during telomere crisis is independent of NHEJ, and consistent with a replicative origin
Source: HighWire-hosted journal article supplement (doi:10.1101/gr.240705.118), 2019-03-14
Supplement: Supplemental_file_1.zip [file contig.2.DB110_length_589_mean_cov_7.89473684211.docx]

**DB110_length_589_mean_cov_7.89473684211**

CTCTGGGATGTAAGAGAAGAATAAGGAAAGGCAACATCTATAAGACCCTATAAGTTACCCAGACATCTGGTTGGATTCTTTATGCTTAC
 >chrX:85508763-85509109 + E=1e-193
TGTATCAGGGCAATGATGCCAGAAAGGAAGTGACACAGATATTTGCAAATTATATTATTTGTAATTTTTGACACATTGGTTGATAAGCT

TCTAATATTTATAGAAAAATCTATTAAATCTTCACAAATATTTTTGTAAGATGTATTGGGTTTCTAAAAGTTTTCTATGGATATTATCA

ATCAGTGAATATTAAGTTAAAAAGAATCAGCTCCAGAAACAATCCTTGGGTATAATGGGAACATCAAACTTCTTGT|TAG|TGCCAATC
 >chrX:8551
TCCATTTTAAACAGGAGGCGAAGAAAATGCTCACTTTTGGCAATTTCTTCTCATCTTAGCATACAGAATAGGTAAATTATGGTAATAGT
0242-85510488 + E=2e-136
TCTATATGTCTCTTGATATAACTTGGTTCTTATTGTTTTTTAAATTGGAACTATTAATAGATTTACACTTTTGGTTTGGAATGAAAGAT

ATATTGAGCTGGGATGAGATTCGGTTAGAAGAAGGTGCAGTGTGTAGTAAAACCTGT
