# Supplementary material for: Chromothripsis during telomere crisis is independent of NHEJ, and consistent with a replicative origin
Source: HighWire-hosted journal article supplement (doi:10.1101/gr.240705.118), 2019-03-14
Supplement: Supplemental_file_1.zip [file contig.2.DB110_length_687_mean_cov_13.5371179039.docx]

**DB110_length_687_mean_cov_13.5371179039**

CAAGACTTGGCAATGCCTCACATAGGGAGGCGGACAGGGGAGGATTTCAGGATGAGCTGAGGTTTTGAGCCCATGCGATGTGGAGGAGG
 >chr20:14580457-14580847 + E=6e-223
GTGGCACTGGCAACTGAGATAGCTATCACTGAGTAGGAACAGGACTGTGAATTGAATTAAGGTGGTGAAAGGACATAGAGGTTGACATT

TTCAGCAGTCACTAGGAATTAAGAGGCTAGAGTATAGGAGAACTCAGCTACTGAGTCCACCACACTGCTGGATAGTGCTGCCATGATAG

GAAATTAATATTTTCAGGAACAAATGATTAAAGTTTTGAAAATGTGGCAAGGCCGTCATCATCAATGCAATGCACACAAAAAAACTGGA

TGTGACTAATCGGATGTCAGTCAAATCACTTAA|T|TTTAATGGAGGAAGGGGCCCACAGTGGCAAAAAGTACCTCAGGGCCGTGAAAG
 >chr20:14582300-14582598 + E=2e-167
TCATAACTTAGCACTGGAAATCACTCCTTACTTAGGTTCTTTAAACCTCTTCTGGTGTCTAGGTCATAATGTTTTCTTCATGCATTTTG

TTGATTCATTAGCCAACTAATTTCTAGCTTATGTCAATTAAAATAAAACTGACCTTTGTTCCCTCATACAATAAGATTTTTCTAACACC

CCCTTCCTAAATAGTTAATTTCCTTTTCTGGGTTACTTCTGTACCATATGATTAAGCATCTCGCAC
