# Supplementary material for: Chromothripsis during telomere crisis is independent of NHEJ, and consistent with a replicative origin
Source: HighWire-hosted journal article supplement (doi:10.1101/gr.240705.118), 2019-03-14
Supplement: Supplemental_file_1.zip [file contig.2.DB110_length_755_mean_cov_13.2768211921.docx]

**DB110_length_755_mean_cov_13.2768211921**

CTATTTTGGTTCTTCTTTGTGGAGGAAGTTAGTACTAGATGCCTCTAGTCAGTTATCTGGAAGCTAAACATGCTTCTTTAAATATTATA
 >chr6:103804537-103804974 - E=4e-245 p=2e-02
ATTTTAATTTTAAAACACTTTAGAGTTTACAGAGACATATGTAATTATTTCTTATTATTATTTTAATGGAAGTTCCGTGTGATACATAC

TGAGAAACATTTTCCACTGTGGGCCTTACATAAATGTAACATCAAATTCTTCATCTCCAGTCCTCTTGCTAAGCAAAAATTGCCCAACA

GCACCTGCTAAACTACAAGGAAAATTCCTTCTTCTTCTGAGAAGTGTTTTGGTCCAACTATTCGTAAAACCATCTGGACTTTTGCTGTT

AAAGCTCTATAAAAAGTTATCTTCCTTTCCCCAAGGAAAAACATCCCTCAGAGTTATTCTCATGCTGCATCATTTTAGA|TT|TAAATA
 >chr6:1
AGAAAATTGATTGCACTTCACATACTAGCAATAAATTGTAAGAAGAAATTATATTTAAACAACCTTTTGTACCAGTAAGAAAATGATAA
03802254-103802516 - E=9e-146
CATAACTAAGATGAGTGTAGTAAAAAATAGGTAGGATCTTTGTGAGGACAATTATAAAATGCTACTAAAATATAATGAAAATGAATAAA

TATATAATTTCTTCTTAATGTATTTAAGAATAAATTATTTCATAAATATTCTCCAAATTTAGCTATAAGCTTATGC|GTTTTCTGATAG

AACTCTTGTTTTGTTTTTGATTACTTTTCATGTCTTTATTGGAATT
