# Supplementary material for: Chromothripsis during telomere crisis is independent of NHEJ, and consistent with a replicative origin
Source: HighWire-hosted journal article supplement (doi:10.1101/gr.240705.118), 2019-03-14
Supplement: Supplemental_file_1.zip [file contig.2.DB110_length_760_mean_cov_10.2289473684.docx]

**DB110_length_760_mean_cov_10.2289473684**

GTCTGAGCAAGGCCTCGTGGCCAGCAGGCTGGTCCACGGACTTCTCTGGCCGGACCTTAACTACCACCTCCCCTCGCCACTCTGTCGTT
 >chr14:104798697-104799077 - E=9e-208
CACCAGAGCATGGGTTGGGTGGCAGGTTCTAGCCCCACGACCATGCCTTCCTGCTCCTGCTGGACAAGCCTTGCCTTCTCAAGCCTGGG

CTCCCCAAACAGCCAAGGGAGGAAAAGGAAATCTTGGTCCCTCTGGGAAGACTGGGACGGTCCAGCTCAGGCTGTGACTTTGCTCCCAG

GAGGCAGGCAGCTCCATCCCAAGCATTCTCAGGGTTCATGCAGACAGCATGTCTGGAGCCCGGGTCTCACGCTCACATCTGATCAAGGA

GAACAAGGGGCCTTTCCTGAAGGG|AAAG|TCAAAATATGACTGCTCATTGACTGTGTACCCAAGAGCTCTGATGGAGATGTACAAAGA
 >chr14:104797365-104797741 - E=2e-211
GATGAACATTGTTCTCATGCCTGGTAATACAACATCCTCTCGGTAGCCCATGCATCAGGAGGCATTTCAACTTTCAAGTCTCATTATTT

AAGAAATACATTTTGTAAGACTGTAGCTGCCATAGATAGTGATTCTTCAAATGGATCTGGGAAAAGTAAAATCTTCTGGAGAAGATTAA

TCCTTCTAGATGCCATGAAGAACATTTGTGATTGAAGATATATCAACATTGACAGGAGCTTAGAAGAAGTTGGCTCCAACCATCATGGA

TGACTTTGAGGGGTTCAGGGCTTCAGCGGAGGAAGGAAATGAAGATGTGG
