# Supplementary material for: Chromothripsis during telomere crisis is independent of NHEJ, and consistent with a replicative origin
Source: HighWire-hosted journal article supplement (doi:10.1101/gr.240705.118), 2019-03-14
Supplement: Supplemental_file_1.zip [file contig.2.DB110_length_764_mean_cov_12.4947643979.docx]

**DB110_length_764_mean_cov_12.4947643979**

GGGACATACAGAGAAGAACAACAGATACTATGGACTCCAAAATAGGGGAGGATGGGAAGGCAGGATGAGCGTTGACAAATTATCTATAG
 >chr5:8677498-8677842 - E=4e-195 p=6e-03
TGTACAGTGTTCACTATTCGGGTGATGGTACACCAAAAGCCAAGACTTCAACACTATGTAATACATGCTTGCAACAAAACTGCACTGGT

ACCCCCTGAATCTGATAAAATAAAATAAAAATAGAAAAGTCTTATTCTAGCATGATGGTACAAGTCTTTTAACTTTTTTCCATTTCATT

TTAAGCTATTTCACCACTTAATGTATGGAAAAAAAGTTGACTCCGAATTTCATCTTCAATACTATAATTTTGA|TGGA|GGTTGCAATG
 >chr5:8748363
AGTCGAGATCACACTACTGTACTCCAGCCTGGGCAACAGAGCAAGACTCCATCTCAAACAAACAAACAAACTCAAAAATGTATTCTTGT
-8748787 - E=3e-243
AAGTCATTACAATTTATTTTGTGCACATTCTACAAGACTTTCATACTATGAACATTAAGAACATTAGATTGAGGGTAGGGGTTCGTGAC

CAGCCTAGACAACATAGTGAGATCCCATCTCTACAAAAAAAATTTGGAAAAAAATTAGCTTGGGATGATGACACATGTTTATAGTCTCA

GCTACTGAGAAATCAGAGGTCGGAGGATTGTCGAGCCCAGGAGATTGAGACTACAGTGAGTTATGGTTGTGCCACTGAACTTCCATCTG

GGCAACAGAGTGAGCCCTGTCTCCAAAAAGAAAATAAGAATATTAATAACATAT
