# Supplementary material for: Chromothripsis during telomere crisis is independent of NHEJ, and consistent with a replicative origin
Source: HighWire-hosted journal article supplement (doi:10.1101/gr.240705.118), 2019-03-14
Supplement: Supplemental_file_1.zip [file contig.2.DB112_length_286_mean_cov_5.76923076923.docx]

**DB112_length_286_mean_cov_5.76923076923**

GGTTTCCTCCTGAGGTGTGTCCTGTGAGCTCACCTTGCTATGGTAATGGGGAAAACACTGGCATAGGACTAGGAAGAGCTGGGATCTAG
 >chr6:20193032-20193157 - E=6e-64 p=4e-02
GCCTGGAGCCAGTATTTATTAAGCGTGTGACCT|TGG|TAGTCAAAGATGTTTTAGAGGAATAAACATAAAAGGTTATTTTTATCCCAA
 >chr6:20187118-20187282 - E=2e-81
TAAGTTTAACTTTGCAATAAACATTTCCACCTAACTTGGTTAATTTGTTTCATTAAACGTGTTTATAGGCTGTAGGTTTTGCTTAAAGC

TGAAAGGCTCAGATGCCCACA
