# Supplementary material for: Chromothripsis during telomere crisis is independent of NHEJ, and consistent with a replicative origin
Source: HighWire-hosted journal article supplement (doi:10.1101/gr.240705.118), 2019-03-14
Supplement: Supplemental_file_1.zip [file contig.2.DB112_length_326_mean_cov_5.8527607362.docx]

**DB112_length_326_mean_cov_5.8527607362**

AACTATAGAAGAATATTGAACGTATTTCATTGTTGGTGGTATGAACAAGTGCCAATTTTAAAATGTTACAAGATTTGTTCACATTTTAC
 >chr4:136639606-136639874 + E=3e-147
AGTTAATTGAACGATATATTTGCAAATAATCATAATAGTAATAACTATAACAATAAAATTTAATATTAATTTTGAATTTATGTGTGCCA

AGTACCATGCTAATTTACATATGGTACTAATTTTAAACTTATAAAAAGTTCATTCATATTATTGTAATTCATATTTTATAATAAAGCA|

GC|AAACCTAAATTCTATTTTTTGCTTCTGTGAATTTCACTTCTTCAGATACCTCACATAT>chr4:136645122-136645182 + E=1e-24
