# Supplementary material for: Chromothripsis during telomere crisis is independent of NHEJ, and consistent with a replicative origin
Source: HighWire-hosted journal article supplement (doi:10.1101/gr.240705.118), 2019-03-14
Supplement: Supplemental_file_1.zip [file contig.2.DB112_length_328_mean_cov_10.0609756098.docx]

**DB112_length_328_mean_cov_10.0609756098**

TGTGCACTCATTTTTGGTTCCATGTGAATTTTAGGATTATTTTTTCTAGTTCTGTAAAGAATGATGTTGGTATTTTGATGGGAATTGCA
 >chr2:214501155-214501313 + E=9e-84
TTGAATTTGTAGATTGCTTTTGGCAGTATGGTCATATTTACAATATTGATTCTACCTGTCCAT|GAGCAT|TTAGACCATTTACATTCA
 >chr2:214503940-2145041
AAGTTAGTATTGAGATATGAGGTACTATTCTATTCACCATGCCATTTGTTGCCTGAATACCTTGGGATTTTTGTATTGTGTTGTTGTTT
16 + E=1e-94
TATAGGTCCTATGAGATTTATGCTTTAAAGAGATTCTATTTTGGTATATTTTGAGGATTTGTT
