# Supplementary material for: Chromothripsis during telomere crisis is independent of NHEJ, and consistent with a replicative origin
Source: HighWire-hosted journal article supplement (doi:10.1101/gr.240705.118), 2019-03-14
Supplement: Supplemental_file_1.zip [file contig.2.DB112_length_456_mean_cov_8.22368421053.docx]

**DB112_length_456_mean_cov_8.22368421053**

ATAAATACTGGCATTACATAAAGTCTTTTACCAATATAGATTTTTCAGTGAATCACATTTAAAGTTACCTCACATGTAATTTTGAATGA
 >chr7:51917898-51918219 - E=9e-179
TGGAGCAAAACTGCACTGCCAGCCCACTTTACAATGCAGGGGATTAGGCTGGCATTACACTTAAGCACTTCCTAATTCACAGGATGGCA

ATCTCCACTGTGGCTCCCTGGAACACGGTGAGAGGCTTTTGCTTCCCCAGGTTGCTGAAGCTGTAATTAAAGACATAAGAGTACCAATC

TCCCTGTGCTAATTACTTGCTGCTTAAAACCTGCTTGGGATATAATTTGGC|CCT|TAAGTGTTTATTACATGGTTTATTAACAGGTTT
 >chr7:51907085-51907223 - E=2e-71
AGGAGGGAGGAGCCAAGATGGCCGAATAGGAACAGCTCCGGTCTACAGCTCCCAGCATGAGCGACGCAGAAGACGGGTGATTTCTGCAT

TTCCATCTGAGGT
