# Supplementary material for: Chromothripsis during telomere crisis is independent of NHEJ, and consistent with a replicative origin
Source: HighWire-hosted journal article supplement (doi:10.1101/gr.240705.118), 2019-03-14
Supplement: Supplemental_file_1.zip [file contig.2.DB112_length_482_mean_cov_4.35684647303.docx]

**DB112_length_482_mean_cov_4.35684647303**

ATCCTTTTCTAAACAATTTGGAGATGCTCATTTTGCTATTTGCCCCTGAAATTCCACTGTAATATTTTTCAGCTGCCACAGGTAGCAGA
 >chr12:24576910-24577100 - E=9e-103 p=3e-02
TCAGTGGTTGGTGATTTTATATTCTTTGAGTTTTATGTGGAACCCAAAGGAATAATTAAATTGTGTGATTATTGCCCACTGTCATTTTT

ATTTAAAAAAAT|AAAATAAAATTCACTCCATTTCATTCC|AGCCACTGTGCCTGGTTGAAAATATTCTAAGTTGTTACCTTTTTTATA
 >chr12:24575414-24575679 - E=6e-145
ATCCAACTAATTTGGTTGGCCTCAAGCAATCAATATATGTAGGTAACTTTCATTAGATCTCTGTGGAAAGGATTTTTGGAAACATGCAG

AATTCCCACACATCATTTGGGTTAGAATAAGTTATGAAACTGTGCAGACAACCCTAAAATTTCATCTACAAGGTTTGTTGTGGGTTCAG

GTGACTCTGCAGATCAGTTATCTTACATATGATGGCTCA
