# Supplementary material for: Chromothripsis during telomere crisis is independent of NHEJ, and consistent with a replicative origin
Source: HighWire-hosted journal article supplement (doi:10.1101/gr.240705.118), 2019-03-14
Supplement: Supplemental_file_1.zip [file contig.2.DB112_length_501_mean_cov_12.874251497.docx]

**DB112_length_501_mean_cov_12.874251497**

GTAAAAACCCTAAAAACCCATTAAAAGATAAAAGGTAGATATTAAAAATTAGCTGGGCATGGTGATGTGCCCATAGTCCCAGCTACTTG
 >chr4:143554983-143555261 + E=9e-156
GGAGACTGAGGCAGGAGGATCAGCTGAGCCCAGGAGGTTGAGGCTCTGGTGAGCAGTGATCACACCGCTGCACTCCAGCCTGACCAACA

GAGTAAGACCATGTCTCAGATAAAAAGGAGGGAGGTGGGGGGAAAAGGCAGGGGGCTGGAGGGAGATATTAGAAACACTTTAATGCAGA

TAAATTCAGCA|TTAAAGTGA|TTGAGATCACTGCATCATGGGGGCAGTTTCCCCCATGCAGTTCTAGTGGTAGTGAGTGATTTCGCAC
 >chr4:143557176-143557390 + E=3e-114
AAGATCTGATGGTTTTATAAGGGGCTTCTCCTTTCACTCGGCACCCATTCTGCCTCCTGCTGCCCTGTGAAGAGGTGACTTCTGCCATG

ATTGAAAGTTTCCTGAGGTCTCCCCAGCAATGCAGAACTGTGAGTCAATTAAACCTCT
