# Supplementary material for: Chromothripsis during telomere crisis is independent of NHEJ, and consistent with a replicative origin
Source: HighWire-hosted journal article supplement (doi:10.1101/gr.240705.118), 2019-03-14
Supplement: Supplemental_file_1.zip [file contig.2.DB112_length_520_mean_cov_5.19230769231.docx]

**DB112_length_520_mean_cov_5.19230769231**

CTCTGCCTCATAAAAAAGAAAAAAAAGATGCTTTAAGTGCCTTAAAAACAGAAGATATTAATATTGAAATTCTCTTCACCCTAAATAGA
 >chr17:54581825-54582043 - E=1e-119
GAATAACATATTAAGATCATTAAAATATAAACCAGTAATCAGATATACTTCAAGGTGAGAATGCTGTTGATAATAAAGGTGAATAATAA

TTTCTTGTATGGTATCTTCTGCTGGTGATGATCTAGTCC|A|TATATATATATATATGAAATTTGTGCTTCAGTGAATTTATTTCCACT
 >chr17:54580560-54580863 - E=9e-165
GTGTTTGAGTAGACTTTAAATAATTTATAAATGAAGACTTTTACTGAATCTTTCATCAGGCCTTCAGTAGAACCTCCGGGGTTTGTTCA

CCTTCTGATATCCCAAGAGAAATAATATCTCCAGATTCTTGTTTATTTTTTTGAGCTGTGTATTTTATGCCATAGTACTCTTAACATCA

TCTGGAAAAAGGTTACCAAGATTTACATTTGGAAGATCAGGATAACCTTCAAATGCATCTGAAGGAAACAACACCCC
