# Supplementary material for: Chromothripsis during telomere crisis is independent of NHEJ, and consistent with a replicative origin
Source: HighWire-hosted journal article supplement (doi:10.1101/gr.240705.118), 2019-03-14
Supplement: Supplemental_file_1.zip [file contig.2.DB112_length_535_mean_cov_8.63925233645.docx]

**DB112_length_535_mean_cov_8.63925233645**

TCTTCCTCATGGTGTGAATCTGGAGGCATTCTCCATTCCCCAAACATTTACTCAGCACCGACTCTGTGTCAAACATAGTAGGAGGTAAG
 >chr9:126398688-126398957 - E=3e-150
AAGAGGAATATTTGGGAGGCCGAGGAGGGCGGATCACCTGAGCTCGGGAGTTCGAGACCAGCCTGGCCAATTTGGCGAAACCCTGTCTT

TGCTAAAAATACAAACATTAATTGGGCGTGGTAGCAGGTGCCTGTAATCCCAGCTACTCAGGAGGCTGAGGCAGGAGAATCACTTGAAC

GT|TAAGTATCTCTTGCAGTCAGTACGTTTTCAGTCTAACTAGTCATGATGGAAATATTCTCACGTGAGATGGAATAGCCCTCTGTTAC
 >chr9:126363276-126363544 - E=1e-149
AGATGAGAAAAACTCAGTAATGATGAGGAGAATCCCAGTAAAAAAATGTGAAACCATCATTGATGCTTTTGTTTTCGTATTTTCCTATC

ATCATTTATGTCATTATATATAGGTTGCATTTAGCAATGTTAAAACTGGCTTCAGAGAAAACTTAAAAGTTTATAAATTGTTACCAAGA

GA
