# Supplementary material for: Chromothripsis during telomere crisis is independent of NHEJ, and consistent with a replicative origin
Source: HighWire-hosted journal article supplement (doi:10.1101/gr.240705.118), 2019-03-14
Supplement: Supplemental_file_1.zip [file contig.2.DB112_length_546_mean_cov_6.86813186813.docx]

**DB112_length_546_mean_cov_6.86813186813**

ACTTGGAGATGTACTTCTGAAGTTCATGTTTTTCCTTTCCTTTATCTATAAATGTGAAAAAAAAACAGTGAGAATGATTTTGCTTTGAT
 >chr7:42385853-42386094 + E=1e-128 p=5e-03
TATGGAACAGTGTTCATGTGAATGAATTTCATAATATTTTAATTAAATATTTCATAACTTGATTCCTAAATACATGTACACACTGACCA

AATGTGGCCCCAAAATATATTTAGTTTAAAGATTTCCAGCCAATACTTCAAGTTTTCC|ATGG|CAGAGACACGGAGCTGAATACTCAC
 >chr7:42387490-42387800 + E=
CCAGTTCCCACTAAAATCTAATTTTATTTGAATGTAAAAAGCGTGACAGTGACTATGTTGCTGATTCCAAACTCTGCTTCCTCAACCCC
6e-175
CACAAACCAATTGAGAGACTGTGAATTAAACATTGCATAAGAAACAGACATCATTTTTATTCCTCACTTGGAATCATCTCAGCATCACC

TTCACTTAATCACAATTGCAAAACACCCCAGAGTCTACAAGAGAAGTTGTCTAGGGGTCTCATCAGAAAGAGAGGGAGACAGGATATAA

AATTACTTCACATC
