# Supplementary material for: Chromothripsis during telomere crisis is independent of NHEJ, and consistent with a replicative origin
Source: HighWire-hosted journal article supplement (doi:10.1101/gr.240705.118), 2019-03-14
Supplement: Supplemental_file_1.zip [file contig.2.DB112_length_559_mean_cov_2.95169946333.docx]

**DB112_length_559_mean_cov_2.95169946333**

GTAACTGCTTGGCTAGGAGAGATTGACTTACCCCCAGTGGGGTCCCTCATTAATGGCACACATTGGACTAAGGTACCAGCTAACACTAT
 >chr3:163935216-163935454 - E=1e-131
ATATCACTCTACCATCCTCCCACTGTGTGTAAGTTATAAAAGTTCTAACCCTTATGTGTACCTGCCCAAACACAGTTGTGGCTACATCA

TTGAAAAGGAAATCCCTTAAAATTCTTGTTTGCAGGTAGCTTCAAACTGGTCAACACA|AC|ATATCCGTCTTCTAAAATCCCTCAAAC
 >chr3:163952964-163953287 -
AGCCTCTCTTTACAATACTCCCTGGAATTTTGATTATTCACTCCCATTCCTGGAACAGTCACATCTTGATTATAGTATTTTCCTCTCCA
E=9e-183
AATCTTTCACTGCTTTGAGTTCAGTCATCTGTAAAATGCTAAGCTAATAGTGGCAGCTCTCTGATTAAAACCCTTGGATAGCTATCCAT

TATCTTTGTCTAAATCATTTTAAAATATCTTAACTGTCATGTTTTTTTATTTTAATTTCCTCTGTCAAAACGTAAGATTTCCTTATTGT

TTCATGATTAATATGAACTTAGCTTTC
