# Supplementary material for: Chromothripsis during telomere crisis is independent of NHEJ, and consistent with a replicative origin
Source: HighWire-hosted journal article supplement (doi:10.1101/gr.240705.118), 2019-03-14
Supplement: Supplemental_file_1.zip [file contig.2.DB112_length_602_mean_cov_16.196013289.docx]

**DB112_length_602_mean_cov_16.196013289**

CCGTTTACCTGAGAGGCCAGGTTCACATTTGGGAAGAAGAGATTTTCTCCCTCCGCAGCAGCAGCGCAGCCTGCACGAGGTTGCTGGGG
 >chr10:1440970-1441303 + E=1e-188
GAAACAGACCGCTCTGTCTTTGGGGTCTTGATGGGTAGAGTGGTTTGCCAGAGAACCACCGAAGAGCCTTCCAGGGACTTCTAAGAGTG

GGCACTTACTTCAGCCCTGGGAAATCTCTCCTCAGAGCCTGGCACAGGTTTTGGTATCAGCGGGGCCACGACAAATGTTCACTGAATGA

GTAAATGAATGACATGGAATGTAGGAAACACGAAATAAAATGAACTGAGAAGATTTGCAGGGAC|TG|ACAATTGCGTAGGTCGAAACC
 >chr10:1488842-1489113
CTCTGAGGCCATCAACCCTCCCGGGGCCTAAGTCAGGCACTTTGGCAGGAGTATCAATAAGTGAGAAATCGTTGAATATGTTCACAAGA
 - E=2e-151
AAGCAAAACTTATCAAAGTCCACTCTGAACCAAGCACTATAATAGGCGAACTTGCATACAAGAACGTTTTAACTGTCACGAGAACACTG

TAAGAGAGATGAAAAATTATTCCTTTAAAAAGTATGAAAACTGGCACACAGAGTTCAAGTGACTGCCCTG
