# Supplementary material for: Chromothripsis during telomere crisis is independent of NHEJ, and consistent with a replicative origin
Source: HighWire-hosted journal article supplement (doi:10.1101/gr.240705.118), 2019-03-14
Supplement: Supplemental_file_1.zip [file contig.2.DB112_length_604_mean_cov_10.3377483444.docx]

**DB112_length_604_mean_cov_10.3377483444**

TTTTCTGTCTCTTCTGAGCCCTCCAAACTGTTCCAACCTCAGCCTGTTACTCAGTTCCAAAGTTGCGTCCACATTTTTGGGTATCTTTT
 >chr21:48011280-48011655 - E=5e-211
AAGTTGCACCCCACTCTACTGAATACCAATCTACTGTATTAGTCAATTTTTACATTGCTGATAAAGACATACCCAAGACTGGGCAAAGG

AAAGACTGGGCAAAGGAAAGGCTTTACAAAGGGAAGAGGTTTAATGGAGAACTCAGTTTTACATGGCTGGGGAAGCTTCACAATCATGG

TGGAAGGCAAGGAAGAGCAAGTCACATCTTATGTGGATGGCAGCAGGCAAACAGAGAATGAAAGCTTGTGCAGGAAAACTTCCCCCATA

TAATAACCATCAAATCTCA|A|CCTGATAGGAGATGCAGTGGCTGCTGCAGGTTACCATGGAGACAGGGAGGCCAGGGCCCAGGGGAGC
 >chr17:42387849-42388077 - E=2e-125
CCATGGCCTGCTAAAGGGAGCTGTTCTGGGAGCTGGAGGCAAACCATGTGACAGTGATGAGGCAGTAGGGGCCTGGGGGTTACTGAGCC

TTTGTTATGTCCCTGACCCCCCAAAACTCTATCCTTCCCTCCCAGCTCTAAACCACCTTCAGCCCTTCAACT
