# Supplementary material for: Chromothripsis during telomere crisis is independent of NHEJ, and consistent with a replicative origin
Source: HighWire-hosted journal article supplement (doi:10.1101/gr.240705.118), 2019-03-14
Supplement: Supplemental_file_1.zip [file contig.2.DB112_length_669_mean_cov_14.9237668161.docx]

**DB112_length_669_mean_cov_14.9237668161**

AGGACACAAACAAATGGAAGAATATTCCATGCTCATGGAGAGGAAGAATCAATATCGTGAAAGTGGCCATACTGCCTAAAATAATTTAT
 >chr6:44731828-44732188 - E=7e-202 p=1e-03
AGATTCAATGCCATCCCCATCAAGCTACCAATGATTTTCTTCACAGAATTGGAAAAAAAACTACTTCAAAGTTCTTATGGAACCAAAAA

AAGAGCCCACATAGCCAAGACAATCCTAAGTAAAAGAACAAAGCTGGAGGCATCATGCTACCTGACTTCAAACTATATTACAAGGTTCC

AGTAACCAAAACAGCATGGTACTGGTACCAAAACAGAGATATAGACAAATGGAACAGAACAGAGGCCTCAGAAATAACACCACACATCT

AC|AA|AAAACAGAACAGAAAAACTGGAAACTCTAAAAAGCAGAGCGCCTCTCCTCCTCCAAAGGAACGCAGTTCCTCACCAGCAACGG
 >chr6:44727023-44727334 - E=2e-175
AACAAAGCTGGATGGAGAATGACTTTGACGAGCTGAGAGAAGAAGGCTTCAGACGATCAAATTACTCTCAGCTACAGGAGGAAATTCAA

ACCAAAGGCAAAGAAGTTGAAAACTTTGAAAAAAATTTAGAAGAATGTATAACTAGAATAACCAATACAGAAAAGTGCTTAAAGGAGCT

GATGGAGCTGAAAACCAAGGCTCGAGAACTACGTGAAGAATGCAGAAG
