# Supplementary material for: Chromothripsis during telomere crisis is independent of NHEJ, and consistent with a replicative origin
Source: HighWire-hosted journal article supplement (doi:10.1101/gr.240705.118), 2019-03-14
Supplement: Supplemental_file_1.zip [file contig.2.DB112_length_673_mean_cov_7.31500742942.docx]

**DB112_length_673_mean_cov_7.31500742942**

AAGAGGTGGATTTCTGCTGCTTCCAATCCCTGATCTCAACATTTCACGGATCATGACCACAAAGTAATTTCTGGCAACTAAATGATTTT
 >chr6:151568427-151568855 - E=8e-246 p=0e+00
AGATTGTTCCAAGAGAAGAAATTTTAAAAGTGATAGCTAAAGAAGTAGGTCATCCTCCAAGCAAATAAATTTAAAGATGGTTCATTAAT

TTGGAAAGGAAAAGGAGCAAAGGAGAGTAAGACTGCTCTACCTCAGCTGCGTTTTTATTCTTGAACTTGCTTTTTTCCAATTTGATTAA

TTTCTGGGGAAAAAGTTTTTTTGTTTTTTTGTTTTGTTTTGTTTTTTTAAATAGAGATAGGGTCTTGCTCTGCCACCCAGGCTGTAGTG

CAGTAGCATGATCATAGCTCACTGCAGCCTCATACTCCTGGGTGGAAGCAATCCTCTCACCTCAGCCT|TCCA|CGGTGGAACTGCAAA
 >chr6:151567394-15
GTGGTAGAACCTCTTTGGAAAGTCAATTTAGGAAGGGTTAAATTTTTTGTTTTTGTTTTTGTTTTTGTTTTTGAGACGGAGTCTTGCAC
1567643 - E=5e-138
TGTCACCCAGGCTGGAATGCAGTGGTGAGATCTCAGCTCACTGCAACCTCCCCCTCCCAGGTTCAAGAGATTCTCCTGCCTCAGCTTCC

CAAGTAGCTGGGATTACAGGCACCTGCCACCACACCCAGCTAATTTTTTGTG
