# Supplementary material for: Chromothripsis during telomere crisis is independent of NHEJ, and consistent with a replicative origin
Source: HighWire-hosted journal article supplement (doi:10.1101/gr.240705.118), 2019-03-14
Supplement: Supplemental_file_1.zip [file contig.2.DB112_length_677_mean_cov_10.4135893648.docx]

**DB112_length_677_mean_cov_10.4135893648**

CACCATGCCTGGCTAATTTTTGTATTTTTGGTAGAGATGGGCGGGGGGGGTCTCACCATGTTGGCCAGTCTAGTCTTGAACTCCTAACC
 >chr10:987404-987765 + E=2e-196
TCAGGTGATCCGCCCGCCTTGGCCTCCCAAGTGCTGGGATTACAGGCGCGAGCCACTGCACCCGGCCTGATCTTGCTTTTTAAGCGATT

GCAATTCCACCTGGTGCTATGGTGATCTGGTGTTCCATGGCCTGTTTACCAGAAGAGCAATGCTTTTGTTGTGCTATATTGTTATTTCA

GTTATTTTTTTATTTTTTATTTTTTGTCTTTTTTTGTTTGTTTGCTTTGTTTTGTTTTGTTTGAGACAGGGCCTCAGCCTGTCACCTAG

ACTGG|TG|AACCTCTGCTTCTCACCTGCATACAGTAATTTCTATGTGAAACATCTTTTCAAAGTCTCGCAGTGGCCTCCTGGACACAG
 >chr10:986495-986809 - E=4e-177
TCTGGCATTGACCGGCCACCCCAGGATGAGACTAGCTCACACCTCTCCTGCGCTCCCGCACTTCTCCCGTCATGCCTTCTGGTCCAAAT

GGTTCCATTTTGTCTCTTTCTTATGTACCCCACAAATGCCCGTGCTATTTTTCTGTTTCAAAAACTTTCTTTCCACTGTGGGAAACATG

TCAGTCCTTGTTCCTCTAATGCTGCTGGGCTCTTCATGCCCACTTCAGGCACTGGG
