# Supplementary material for: Chromothripsis during telomere crisis is independent of NHEJ, and consistent with a replicative origin
Source: HighWire-hosted journal article supplement (doi:10.1101/gr.240705.118), 2019-03-14
Supplement: Supplemental_file_1.zip [file contig.2.DB112_length_692_mean_cov_7.15895953757.docx]

**DB112_length_692_mean_cov_7.15895953757**

ATTTTCCAATTATACTACATTGCTAAATAGTTACATTGAGACTTGGCTTTGTATTTTTTAATACACAAAGGATATCTTAAACTGCAATT
 >chr11:38400559-38400918 - E=3e-204
TTATGCTCATATTCATCATAAAGTTGTGTTATATGTTTAAATATAAAAAAAAACTTATGCCTTCCTGACTCACCACCTTCAATAAGAGA

AGAAATCATTGGCAGTGTCATCAATATTACCTTAACAAACCAAAATAATTCCATATTTCATATTTATTTTTTCTGTCTTCTGCCTACTT

CTAAACAATCTATGTCCTAATAGCCTTGTGGTCACAGAGTATAGGCCCCAACATTTTATAGTATTTCTTTAGCAATAATGTAACAAATG

TTA|CAT|TATATATATATGCTTAATAACATCTGAGTAAGAGTATTCACATGTTTACTTTTTAACTATTATAATAATATTCAAATTATT
 >chr11:38390568-38390899 - E=1e-182
TTGATCACCAAAGAAGAAAGTGTTGAGTTATTGAAAACTATAAGATCTATACAAAATGAAGGCTGGTAATCATGTTTAATTAATATCAT

GGATTTGACCATTGGTCTCTAGACAGTTCGCAACACACAAGAGCTTGACCCAGAGCATATTCCACTTATTATGCTCTGCCAGTTACACG

TTCCATACTCCTAACCTACAACACTAAAAAAAAGACAAGAAAATCATGTCGTCTTCTCAGGCTGTTGCTTT
