# Supplementary material for: Chromothripsis during telomere crisis is independent of NHEJ, and consistent with a replicative origin
Source: HighWire-hosted journal article supplement (doi:10.1101/gr.240705.118), 2019-03-14
Supplement: Supplemental_file_1.zip [file contig.2.DB112_length_697_mean_cov_6.22668579627.docx]

**DB112_length_697_mean_cov_6.22668579627**

TGATCCCATATGGCTGTAATATGAAGTACTTAAATCTCCTCCAGTTGAAGTAGAAAATATGTCAGAACTCATTAAGAAGTTATCCATAT
 >chr5:103021255-103021648 + E=1e-224
ACTGTATTGATTTTTATAAATTGCTTCTTAAATTATAGTTCAGCATGACACACATGAACATCACTGAGATCAGGTATTATTTGGACTAA

ATTAACACATTTTGCAAGTAGTTACTGTCATAGCTATTCTCTGATGCTATGCCATGATAATCCTTGTCCTTTGGTAAATTATTTAAAAC

CCAGACTTTTATTTTTATTCTCATCAAAGGTATATGTTGAATAAATTGTATTTATTGTTATGTTATAGACGTCAACCCTGGTGCCTAAC

AAATTATGACCCTTCTCAGGTCAATCTTCCCTA|TCCA|TTTGTGTTGCAATAAAGGAATGCTTGAGACCAGAAATTTTATAAAGAAAA
 >chr5:103023250-103023558 + E=2e-170
GAGGTTTATGTGGCTTACAGTTCTGAAGGCCGTACAAGAAGGATGGTACCAACATCTGCATCTGGTGTGGGCCTCAGGAAGCATACACT

CATGGCAGAATATATACCCTCATGGCAATGGGGAGCAGGCACCATGTGGGGAGAGAGGGATGGAAGGAGAAGACAGGGAGGTGCCAGAC

TCTTTCCAACAACCAACGCTCTAGATAACAAACAGAGCAGAACTCACTCATTACCATGGCACCAAGTCTTTCATGA
