# Supplementary material for: Chromothripsis during telomere crisis is independent of NHEJ, and consistent with a replicative origin
Source: HighWire-hosted journal article supplement (doi:10.1101/gr.240705.118), 2019-03-14
Supplement: Supplemental_file_1.zip [file contig.2.DB112_length_712_mean_cov_10.5997191011.docx]

**DB112_length_712_mean_cov_10.5997191011**

CTGGCCCCACCCACACATGCTCTTCACCTTTGAACGACAGCAGCCTAGGCCATCCGGCTTTGCACAACCGGAACAGCTTCCACTTGGAA
 >chr10:1416542-1416788 - E=3e-127
AGCAAAAGTTTCACCACAGTCATGACAATATAAAGCGTTGGCCTTTCTCCCCCAGATGCTGTCCTTTAATGCGTTAAAACTTTAGACTT

AGCACCACATTCCGGACACCGTATCAAACAAGGTCACGTGCGTATGAGGCTCTGGAGGGTGCCCGTGG|TGT|GAGAAGAAGGAGGAAT
 >chr10:1391745-
GGAGGGTGGAAAGTTGCCCATAGTGAAGGAGGCAAGTTTAAAGGGAAGGGTAGAGGCATGGAGAATTGGTTGTGGGGAGCAGCCAAGGC
1392208 - E=8e-255
AGGCGTCCCCACAATTGACCTGCCACCAAGGGAACGTGGGTGAATGACCAAGGCAGGCTTCCCCACGGAGATCAGACATCAATGGAACA

TGGATGAATAATCAGAGAGGCGTCCCCATAAATGATTAAACACCAAGGGAAGGCTGCCTTCCCAAGTCCGTGACCAGCGCCGGAGTTTT

GGGTCAATGGATAAAATGTGTCTCCTTTGTCTCTACAAGAAATGAAAGGAATTGAAATTAAGAGAAGGGAGAGATTGAAGGGTGGCGCC

AAGATTGAAAGGAGAAAGAGGTTGAGGGATAGGGAGGGAGGTTGGCGAAGAGAGTAAAGAAGAGGCCACTTACTGGATTTAAAATTGGT

GA
