# Supplementary material for: Chromothripsis during telomere crisis is independent of NHEJ, and consistent with a replicative origin
Source: HighWire-hosted journal article supplement (doi:10.1101/gr.240705.118), 2019-03-14
Supplement: Supplemental_file_1.zip [file contig.2.DB112_length_765_mean_cov_5.79607843137.docx]

**DB112_length_765_mean_cov_5.79607843137**

CAAACAGCCCAGGTTCAAATTTAGTCTCTACCACTGTGAAATTGGGCAAATTGTCTAACCTCTGTATGCTTCTGTTTCTTCATTTGCAA
 >chr5:105891474-105891850 - E=2e-214
AGTGGGGTTTATATTACTGACATAATCGTTGTGAAAATTAAAATATTTTAAGCATAAACATTTAAAAATAATGGTGGCAGACAGCAAGT

CCTAAGTGTAAACATTATTATTATTTGTTACAACGCAAATTTCAACTTCTCTAGTTCCAAACATGTCATTTCTTGTGTATTCCACATAT

AGTTTACCATAAGCTTTTCAAGTTTCATCTGTGAAACCAGTGGGTATTATAAGTAAAACTACATTAATTGTATAGATTAATTTGGAGGA

AAAGATATATATATATATAT|CATATA|TAACTCAGCTGGATTGCATTGCTAGCGGTAGTTGTGGATAGAGCCAGACAAGGTGAAGACA
 >chr10:1235353-1235712 + E=4e-201
CATGTGCTCAGGCCTAGAAATGAAAGCCTGGCTTGTGTTTAATTTTAACTCCTGTGGCTGGAAATGTGAAAATGCATTAACTCCTGGCT

CATTCCTCCTGAAGTGGGCATCGGCTGATTGAAGACGGAGCTCGAGTCCCAAGGACAGAGGGTGTCTGCAGCTGCAGGGGCACCTACTC

AGGCCTGTCCCACCCTGTTCCTCAAGATAACACAGCAGCACATACCTGGTGACCCAGTCCACCCAGAACACATGGCCCTACCTCCTTCC

CCAGAACACGTGGCGCTACCTCCTTCCCCAG|TTCACAGCACAAAATGTCCCCTGG
