# Supplementary material for: Chromothripsis during telomere crisis is independent of NHEJ, and consistent with a replicative origin
Source: HighWire-hosted journal article supplement (doi:10.1101/gr.240705.118), 2019-03-14
Supplement: Supplemental_file_1.zip [file contig.2.DB112_length_767_mean_cov_9.24641460235.docx]

**DB112_length_767_mean_cov_9.24641460235**

ACGGTGGCTCACACCTATAATCCCAACATTTTGGGAGGCCGAGGCGGCTGGATCACCTGAGGTCAGGAGTTCAAGACCAGCTTGACCAA
 >chr10:1135957-1136390 - E=1e-239
CATGGTGAAACCCCACATCTACTAAAAATACAAAACTTAGCTGGGCGTGGTGGCATGTGCCTGTACTCCCAGCTACTCGGGAGGCCGAA

GCAGGAGAATCCTTTGAACCAGGGATGCGGAAGTTGCAGTGAGCCGAGATCCTACCACTGCACTCCAGCCTGGTGACACAGCAAAACTC

CATCTCAAAAAATAAATTAATTAAAAATAAATTTTAAAAAACTACAAAATTTAGCCAGGCGTGGTGGCGGGCACCTATAATCCCAGCTA

CTCGGGAGGCTGAAGCAGGAGAATCGTTTCAACGTGGGAGGCGGAGGTTGCAGCAAATGAAGATTGCACCACTGCAC|CAGTGCCCTCT
 >chr10:11
TCACTTGCTCACTCGCCCTCCCTCACACCTCCACGCTGCCAGGCTGAGAGGTGGCATCGCCTGTGTGCACAGAGGGACAGGTGTGGGTG
32874-1133208 + E=4e-189
GGGCCCGTGGCTCTGAGCGCCTGTCTGCCCGTCCACAGGGCCCTGATGAGCTGTGGAGCCTTCCCCTCCCCTTTCCCAGGACCTCCTCT

CCTTTGGCCATTCCTGCTGTCACAGTGTCTTCTCTTTCTTGCCCTGGACATTTCCCCTTAGTGTGTAGACAGGCTGGCGCCTTTCCCGT

GTTAGACCCCCTCCTCCGTGCTGCCTTCTTACCTGTCTTCCTCCCCTGGCATCCCA
