# Supplementary material for: Chromothripsis during telomere crisis is independent of NHEJ, and consistent with a replicative origin
Source: HighWire-hosted journal article supplement (doi:10.1101/gr.240705.118), 2019-03-14
Supplement: Supplemental_file_1.zip [file contig.2.DB113_length_370_mean_cov_10.6378378378.docx]

**DB113_length_370_mean_cov_10.6378378378**

TAGTTCATCCTAACCCAAGATGTATAACTTTTACAGATAGAAAAGACAATAGCAAAAAAAAGAGTTTATATGAGTCATAAGCAAGTATT
 >chr5:164899336-164899500 - E=2e-79 p=5e-02
TGAAAATGAATAAACACAAGAGTTGGTATATGACATTTAATAAAATAAATCTATATTTTACTCACCAAAGAAGA|GTAAAA|TTTTTTT
 >chr5:
GCAGATTTGAGTTCATTGTAGATTCTAGATATTAGTCCTTTGTCAGATGTATAGATTGTGAAGATATTCTCCCACTCTGTGGGTTGTCT
164897446-164897647 - E=1e-109
GTTTACTCTGATGACTGTTCCTTTTGCTGTGCAAAAGTTCTTTAGTTAAGTTCCAACCATTCATCTTTATTTTTATTGCATTTGCTTTT

GGGTTCTTGGTCATGA
