# Supplementary material for: Chromothripsis during telomere crisis is independent of NHEJ, and consistent with a replicative origin
Source: HighWire-hosted journal article supplement (doi:10.1101/gr.240705.118), 2019-03-14
Supplement: Supplemental_file_1.zip [file contig.2.DB113_length_434_mean_cov_8.20506912442.docx]

**DB113_length_434_mean_cov_8.20506912442**

AGAGTGAGACTCCATCTCAAAAAAAACTACACCGAGACACCATCTTTCCCTAGTCAGAACGGTCATTACTAAAAAGTCAAAAAACATTA
 >chr4:91306493-91306646 - E=4e-57
GACTTTGACACAGATATGGTTAAAAAAAAAAGGAACACTTACATACTATTGGT|ATGTA|AGTAAAGTGTCTTACACACAGAAAGACAC
 >chr4:91068053-91068340 - E=
AGTAAAGTGTCTTACACATGGAAAGCATTAAATGACTGTTAAGTTATTAAACAAAGTATTAAAAATAAATAAATACAATAGTAAATAAA
2e-158
TAAATCACTGAACAAATGAATTAAACAACTAAGTAAATAAATAAATAAAATAATCAAAATACAAGTCGTAGCCTGAAGACAATTAGAAG

AAACATTGTGGTTTGACTTCATAAATTCTTGAGATCATAAAAATGAATATTTAATCTTACGTGTTAATTACTTTTAAAAG
