# Supplementary material for: Chromothripsis during telomere crisis is independent of NHEJ, and consistent with a replicative origin
Source: HighWire-hosted journal article supplement (doi:10.1101/gr.240705.118), 2019-03-14
Supplement: Supplemental_file_1.zip [file contig.2.DB113_length_450_mean_cov_8.33333333333.docx]

**DB113_length_450_mean_cov_8.33333333333**

ATTTTTGTTGCTTTGTTTTTATTTACATGTAATTAAAAAAATCTTTTAATTGATATTAAACCAGGCATTTTGGAAGCAGAACACTCTCG
 >chr18:40417734-40417988 + E=2e-141
GTTTCTGTCTACACAGTACCAATGAAATTAGGTAAATATAGGACTATAGCAGTAAAACATGAAGTAGAAAAATAAACGAAGCATATCAA

TTAACATTTTCCAGGAAGGAAAATACCTGAGTGACTTTTTGGGGAGAAAAAGATGTCATGGCAATATAAAAACCTG|TACTAA|TCAAG
 >chr
CCAGATGGGTCCTGGCAATAGGCATCACAACACCCAGCCCATAATGACAAGAGAAATGCTAACATGACAGAAAGTTAGTAAACATATTA
18:40418942-40419132 + E=8e-103
AAAATCTTCCCTCATCCTAAACCAATCCTTTGCACACTGGAAAATGAGAAGAGCAAAATCCCCATAAAACAAATTAACAAAAATCAAGA

GAGGGAG
