# Supplementary material for: Chromothripsis during telomere crisis is independent of NHEJ, and consistent with a replicative origin
Source: HighWire-hosted journal article supplement (doi:10.1101/gr.240705.118), 2019-03-14
Supplement: Supplemental_file_1.zip [file contig.2.DB113_length_493_mean_cov_6.69371196755.docx]

**DB113_length_493_mean_cov_6.69371196755**

TTGGTGAGTGCTAATAAAAACAGCAGCTGACGTTTTATTCCTTGAGTGTATTGAAAAAACTCTGGCTTTGGAATCTGGCAGTTTTTACC
 >chr9:17626860-17627205 - E=3e-196
GGCAGTCCCAATTCTTCTATTTAGTAAGTTAAACATGTTATTCAGTCTTTGGCACCTCCAATACAGGGTAGTTGTGACAATTACATGAG

GAGAGGTACATCCAGCACACGACCAGGGCCTGACAGAAAGTGGAGGTTAAAGAAGATTATCCTGGCTCAGACCTGCTCAGGGAACCAGT

AATGGGGGAGGGGAAGCTGAGCCAGCCCCCAAATTTGGTAGTTAGAAAGGAGACTATTTTCAAGGCCTCCTCTTCCTC|TTCCTCGA|C

TCCCACAGGCTCCATCTGCTGTGTCCTGCGGCCAGAGCCTCCCTCTGGGAACCAAAACCAAAGAGCCAAGTGGACACCTCCCCAGCCTC
>chr9:17626009-17626149 - E=1e-72
ACAAGACAGTCCATCAGCTCAGGTAGGGAAGATGAGATGGGGAAGACTGA
