# Supplementary material for: Chromothripsis during telomere crisis is independent of NHEJ, and consistent with a replicative origin
Source: HighWire-hosted journal article supplement (doi:10.1101/gr.240705.118), 2019-03-14
Supplement: Supplemental_file_1.zip [file contig.2.DB113_length_511_mean_cov_6.16438356164.docx]

**DB113_length_511_mean_cov_6.16438356164**

ATTTTTTTTGTATTTTTAGTAGACGGGGTTTCACTGTGTTAGCAAGGATGGTCTCAATCTCCTGACCTCATGATCCACCCGCCTCGGCC
 >chr16:67921651-67921960 + E=2e-168 p=1e-02
TCCCCGTGTTGGGATTACAGGCGTGAGCCACCGCGCCCGGCCTATTCTTTACTTTCTAAATTGAAAAACTCAGCCAGGCATAGTGGCTC

AATCTTGCAGTATCACCTCCTCTAGGAACTATTCCCTAACCCTGACTACAAGCTGAATCAGAAGGCTCCTCTAGGTCCACACAGCTCCT

GGATTCCCTTCTGCCTCAGTACTGATAGCACTAGCTTGTTAT|AT|ATATTCCTTTTAACCCTCACAACAACTCTGTAAGGTCAGGATT
 >chr16:67922803-67923003 + E=9e-109
ATGACCCCCCCTTATATTTTATTTTATTTTTTGAGACAAGGTCTCATTCTGTCACTCAGGCTGGAGTGCAGTAACTCAGTCCTGACTCA

CTGCAGCCTTGACCTCCTGGGCTCAAGCGATTCTCTAGCCTCAGCCTCTTGTGTAGCTAGGACTATAG
