# Supplementary material for: Chromothripsis during telomere crisis is independent of NHEJ, and consistent with a replicative origin
Source: HighWire-hosted journal article supplement (doi:10.1101/gr.240705.118), 2019-03-14
Supplement: Supplemental_file_1.zip [file contig.2.DB113_length_515_mean_cov_6.9067961165.docx]

**DB113_length_515_mean_cov_6.9067961165**

TCATTCTGACATTTACAGATTTAACATCCTACTTCACAAGATGCTCATACCCTTAATCCATTACAG|CCGATG|CCTCAGCTTCAGGTC
 >chr9:68422112-68422178 + E=5e-16 >chr1:14313082
TGTTGGAGTTTTCTAGAGGCCCATTCCCGACCCTGTTTGCCTGGTATCAGCAGTGGTGTCTGCAAAACCATGGATTTTCGTGATCCGCG
0-143131179 + E=9e-200
AATGCTGCTGTCTGATCGTTCCTCTGGAAATTTTGTCTCAGAGGAGTACCTGGTCGTGTGAGGTGTCAGTCTGCCCCTGCTAGGGGGCG

CCTCCCAGTTAGGCTGCTCGGGGGTCAGGGGTCAGGGACCCACTTCAGGAGGCAGTCTGCCCATTCTCAGATCTCCAGCTGCATGCTGG

GAGAACCACTGCTCTCCTCAAAGCTGTCAGAGAGGGACATTTAAGTCTGCAGAGGTTACTGCTGTATTTTTGTTTG|AGAGAAGACTAG

ATCTGGTTAGTGTCAAAGTACCCCATATGGGTTTGGGCACTGGTTCTCGAGAAGTGAGTTTATCTTTATGTTC
