# Supplementary material for: Chromothripsis during telomere crisis is independent of NHEJ, and consistent with a replicative origin
Source: HighWire-hosted journal article supplement (doi:10.1101/gr.240705.118), 2019-03-14
Supplement: Supplemental_file_1.zip [file contig.2.DB113_length_552_mean_cov_6.94202898551.docx]

**DB113_length_552_mean_cov_6.94202898551**

TATATGAGATCCATTTTTATGGCAACATTTCTGGCCTGTAATTGATATTCTCTCCAAAAAATTTAGTCAAAGAATTAGACAAACTCCAT
 >chr10:19464392-19464854 - E=1e-251
CTGTGATCTGAAAATATTAAATTTTGAATAGAAACACAGAATTTTAAGGTCCAGTTTTAAATTTTGGTTGGCCTTACATCATTTTCCCA

AACACAACCTTTTTGCTTTATTTGAACTCCTGGGTGATCCTGAAATATGAATATTATTACATGCTCATTTGAAGTTCTGAATAAAATTA

ATGGAGAAGTGAATATTTATAAAAGTGTATTTAAAATATGCAAAATAATTATAATTTTTTCATAATATTTATAATTAAAATATTTGGAT

GCAATAATTTCAGCTGCAAGCATAGAATATTTTCCATATTACTGGAAGAGAGGCCCAAGGACTAGACCAGATGTTTACCTTTTAATATA

TATATATATAAATATA|T|AAAAATAATATCTATCGCCATGTGTCATTATGGAAAGAAATTCAACATGTGTTTTGGAGTAAAAAAATAA
 >chr10:19462156-19462248 - E=7e-39
GTTACAGAAAAATATTATAG
