# Supplementary material for: Chromothripsis during telomere crisis is independent of NHEJ, and consistent with a replicative origin
Source: HighWire-hosted journal article supplement (doi:10.1101/gr.240705.118), 2019-03-14
Supplement: Supplemental_file_1.zip [file contig.2.DB113_length_569_mean_cov_10.5061511424.docx]

**DB113_length_569_mean_cov_10.5061511424**

GAGTAAGTTCTAGGGATTTACTGCACAATATAGTACCTCTAGTTAACAGTATTGCACACTTAAAATTTTAAGAAGGTAGATCTCATATT
 >chr8:100948092-100948401 + E=3e-174 p=3e-03
ATATATATATAAAAGAAACCAGGATACATTTAGAGGTGGTGGCTATAATTTTATTGTGATGATAGTTTTATGGGTGTGCGCATACATCC

TAACTCATGAAATTGCGTACATTAAATATGTACAGTTTTTTTGTTTATGTTATACCCCAATAAAGCTCGTTTTTAAGAAGAGTCCTCAT

TTGTATAATGACGAGCAATAGATAAAGATGTTTTTAAAGCAA|AAGACCAATATATATATA|TATATATATATATACCCATATATATAG
 >chr8:100949685-100949928
AAAAAGCTTACAGAATAAGGATATAAAGAAGATATTTTTGTATAGCTTATGATATGTTTGGATTTTAAGCTAAGTGTTATTACAGAAGA
+ E=1e-129
GTCAAAAAGTTTTTAAAAAATTAAAAGTTTATAACGTAAAAAACTTACACTAAGGCTGAGTGCAGTGGCCCATGCCTTCAATCACAGCA

ACTCGAGAGGCTGAGGTGGGGGAATTGCTTGAGGACA
