# Supplementary material for: Chromothripsis during telomere crisis is independent of NHEJ, and consistent with a replicative origin
Source: HighWire-hosted journal article supplement (doi:10.1101/gr.240705.118), 2019-03-14
Supplement: Supplemental_file_1.zip [file contig.2.DB113_length_572_mean_cov_10.8094405594.docx]

**DB113_length_572_mean_cov_10.8094405594**

TTTATGGCTGCATAGTATTCCAGGGTGTATATGTGCCACATTTTCTTAATCCAGTCTATCATTGATGGACATTTGGGTTGGTTCCAAGT
 >chr10:13120445-13120684 - E=4e-132
CTTTGTTATTGTGAATAGTGCCGCAATAAACATATGTGTGCATGTGTCTTTATAGTAGTATAATTTACAATCCTTTGGGTATGTACCCA

GTAATGGGATTGCTTGGTTAAATGGTATTTCTAGTTCTAGATCCTTGAGGAATAGCCACA|C|ACAGTTTCTATGGTTCAGGAATCTAG
 >chr10:12932458-12932749 -
GCATGGCATATCTGGGTTCTCTGCATCATGGTCTGTCACAAGCCTGCAGTCAAGATATCGGGCAGGGCTAGGGTCTTATCTGAAGGCTC
 E=2e-163
GACTGGGAAGGATCCATTTCTAAGCTCACATGATGGTTGGCAGGATTTGGTTTCTTGCAGGTTGTTGAACTGAAGCCCTCAATTCCTCC

CTGGCTGCTGGCTGCCTTCAGTTCCTTGCCAAGTGTGCATCCCCAGCATGGCTGCTTGCTTCATCAAAGTGTGCAGACTAAGAGGG|AG

ATCGGAAGAGCGTCGTGTAGGGAAAGAGTGTTAAGATTAGT
