# Supplementary material for: Chromothripsis during telomere crisis is independent of NHEJ, and consistent with a replicative origin
Source: HighWire-hosted journal article supplement (doi:10.1101/gr.240705.118), 2019-03-14
Supplement: Supplemental_file_1.zip [file contig.2.DB113_length_587_mean_cov_18.262350937.docx]

**DB113_length_587_mean_cov_18.262350937**

GGCTCACACCTGCCATCCCAGGACTTTGAGAGGTTGAGGCGGGTGGATCACTTGAGGTCAAAAGTACGAGGCTGGCCTGGCCAACATGT
 >chr19:53956860-53957229 + E=2e-204
TGAAACCCTATCTCTACTAAAAATACAAAAATTAGCCAAGCATGGTGGTGTGTGCCTGTAATCCCAGGTACTCAGGAGGCTGAGGCAGG

AGAATGGCTTCAACCCAAAAGGTGGATGTTGCAGTGAGCCGAGATCAGGCCATTGAACTCCAGCCAGTTGCAACAGAGTGAAACTTCAT

CTCAAAAATATAAAAATAAAAAAAATGTTTTAATGTCACAACGTGCCTTTTCTTCATGGATATAGGTAATTTTATGACAGTTATTCAGA

AAAACATTGTAT|T|CCGGCTAAAGGTCTTTCCACACTCATTACACTTGTAAGCATTGTCTTCAGTATGAATTTTCCGATGTATTTCAA
 >chr19:53958890-53959109 - E=5e-111
AATTTGATCTGAAACTGTAAGCTTTGTCACATTCTTCACATTTGTAAGGTTTCTCTCCAGTATGAAGTCTACGATGGCATGTAAGGGAT

GACTTCTGACTAAAGGTCTTGCCACACTCATTACACTTGTAAGGTTTCTCTCCAG
