# Supplementary material for: Chromothripsis during telomere crisis is independent of NHEJ, and consistent with a replicative origin
Source: HighWire-hosted journal article supplement (doi:10.1101/gr.240705.118), 2019-03-14
Supplement: Supplemental_file_1.zip [file contig.2.DB113_length_600_mean_cov_12.4966666667.docx]

**DB113_length_600_mean_cov_12.4966666667**

AGGAAAATAAAAATACTATTTTCTGATAAGAAAATTATGTGAAATTCAAATTTCAGTGTCCCTATGTCAACTTTTATTAGAACAGCAGC
 >chr2:199687275-199687601 + E=2e-184
AGCCACATCCATTTAGGTACTGTCTGTGGCTGCTTTTACACTTCGAGTGGGATGGTAGTGACATGGAGTATGTAGCCTACCAAGCTTAA

AACATTTACTGTTTGGCCCTTTGGCTGACCTCTTGCATAAGCTATATAATCTATTTAACTCAACATGAAAGTAAGCATTCAAAGGGTTT

TCAATCCTGCAAGTAGGTGTGTCCGGAATTGGTTCCTTCCAGTGGGTTCCTGGTCTCGC|ATATATATATATGTTTTTAATTTCACATG
 >chr2:199690549-199690823 +
GATTGGGTAGTTTGTAGAAAATTTCTTAGTCATATCAAAAATATGTAGAAACAATGAGCCTATAGCAGGTTAAAATGCATGCCCCATTT
 E=3e-153
GTTGATATATATTTTTGTTTAACAATCATAGAACCACCCCAACTCTCAGATGATTCTTTGTTTTTCCTTGTATAATATGCTTCACAGAC

TGATATGCAGGAGTGAGTCTAGTCAGATACCTATCCTCTGCATCTCAAAGTGGCCTTATTTCTCTTC
