# Supplementary material for: Chromothripsis during telomere crisis is independent of NHEJ, and consistent with a replicative origin
Source: HighWire-hosted journal article supplement (doi:10.1101/gr.240705.118), 2019-03-14
Supplement: Supplemental_file_1.zip [file contig.2.DB113_length_603_mean_cov_8.2056384743.docx]

**DB113_length_603_mean_cov_8.2056384743**

AATGCCCAAAACAGTTTGTGTGCCAGTATATATGTGCATGAATTTCTCTATGATTGGCAGTTAAGTGGAAAAGCGGGGTTATAAGACAT
 >chr5:2795441-2795752 + E=2e-175
GGCTTACGATCTCTACTAATACCATCTGAATCTTGTGGTGATGGTGATGATGATGATGAAGACACTGGTATTCGACTACTGAGTCAATT

TTTAAAACTGTGTAGATTTATTTATATGTGTTATTTCTTCTGGCCTCTGTTTTAGAAATAAATATTAATCTTGTAATTTGACCATTTCA

TCTAAGTTTTCAAATCTGGTTTAGGAAACCACTTAGTCTAACCT|TAGTCTAA|CCGCCTTCATAGCTGTCTTGGCGACAAGCTGTGGG
 >chr5:2796814-2797098 + E=3e-159
TCAGGATTTAGGATGGTGTCTACCGGACTCTTAGGTACCTTCCTCCGAGAGAGCCCCATTTGTAATCTATTTTACCCTTCAGTGTAGTA

TTACGTGCCTGCAAAAGTGATATTTCTGAGGATTGATACTCCAATACATCATAATCTGAAGGTTTTTAGGTTTATACTTTGTGTTCTGA

ACTAAGCAGATAACAAGAGCTCACTTAGTCATTTCTCCGATAAAAAGTTATCTTCAAAGAAGAGGACAATT
