# Supplementary material for: Chromothripsis during telomere crisis is independent of NHEJ, and consistent with a replicative origin
Source: HighWire-hosted journal article supplement (doi:10.1101/gr.240705.118), 2019-03-14
Supplement: Supplemental_file_1.zip [file contig.2.DB113_length_621_mean_cov_5.40901771337.docx]

**DB113_length_621_mean_cov_5.40901771337**

ACTGCTATCTAATTCTAGAACATTTTGTCACTCCAAAAGAAACCCTATACCCACTCCCCATTCATGTCCAGCACCTGGGAATTCCTAAT
 >chr10:12934939-12935231 + E=6e-155
CTACTCTCTGTCCCTTTCTTTTTCTCCTCTCCTTCTGGGACTCTCAATATGTGTATGTTGGTCCACTTGATAGCATCCTGTACATCTCT

TAGGCTCCGTTCATTTTTCTTCATTCCTTTTTATATCTCTTTCTCAGCCTGGATAATCTATAAGTTCACTGATTATTCTGCTTGTTCAA

ATCTGCTGTTGAGCCCCTCTA|GTGA|CATCCTCCATACCCTAAGTCCACTTGTGCCTTTTTAATTCTATTTGTTTCAGCCACAAACTT
 >chr10:13279013-13279303 + E=2e-131
GTATTGAACACCTGCTGCCATGCACCAGGCACCTGTGCCCGTCACTGGCGAGTCAGCCTTGGGTAAATCATTTTTAAAATTTTTTCAGC

TGGGCGTGGTGGCGCATGCCTATAATCTCAGCACTTTGGGAGGCCGAGGCAGGCAGATCACGAGGTCAGCAGTTCGAGACCAGCCTGGC

CAACATGGTGAAACCCCGTCTCTACTAAAAATACAAAAAATTAGC|CGGGCCTGGTGGCACGCGCCTGTAATCCCAGCTACTCGGGTGG

C
