# Supplementary material for: Chromothripsis during telomere crisis is independent of NHEJ, and consistent with a replicative origin
Source: HighWire-hosted journal article supplement (doi:10.1101/gr.240705.118), 2019-03-14
Supplement: Supplemental_file_1.zip [file contig.2.DB113_length_625_mean_cov_6.0608.docx]

**DB113_length_625_mean_cov_6.0608**

CAGGAAAGCTGAACTTAGAAAACAGCTTGCCTTCTACCCTCTCACCCCACCTGCAGCATCAACATCTACAGCCTATCTTCAGGCTCCAA
 >chr10:13270141-13270563 - E=3e-239
CTCATCCAAAAGCATCAGATCACCTGAAAATTTTTATATGGTTTTCTTGTGGCTTTATGCTTCTCCTATTTGTATCCTCTTCTCTAAGC

CTTGGTCTTTTCCTTACTAGCAAAAAATAGAGAGTAGGAAAGGCCCAGGGAGGCCAGGAGTTTTGAGGGGCTGAGGTGGGCGGATCACT

TGAGGTCAGGAGTTTGAGACTAGCCTAGCGAATGTGGCGAAACCCTGTCTCTACTAAAAATAATTAAAAATTAGCCAGGCGTGATGGTG

CACACCTGTAGTCTCAGCTACTTGGGAGGCTGAGGCAGGTGAATTGCTTGAAACTTGGAGGTGGAG|AAA|TCCTGACCTCAGGTGACC
 >chr10:12362307-1
CGCCTGCCTCAGCCTCCCAAAGTGCTGGGATTACAGGCAGGAACCACCATGCCCTGCCCCTCTGCTCCTTTGCATGTGCTGTTCTTTCC
2362507 + E=1e-108
ATCTGGAATTTTCTCAGTCCTTCTCCCTGTCCATCCAGGTCCCCAGGGGTTCAAATCAAGTCCTCTCTACTCTGAGAACATCTTCCCAG

TCAA
