# Supplementary material for: Chromothripsis during telomere crisis is independent of NHEJ, and consistent with a replicative origin
Source: HighWire-hosted journal article supplement (doi:10.1101/gr.240705.118), 2019-03-14
Supplement: Supplemental_file_1.zip [file contig.2.DB113_length_625_mean_cov_16.08.docx]

**DB113_length_625_mean_cov_16.08**

ACCATTGTACTCCAGCCTGGCCAACAAGAGCAAAACTCCGTCTCAAAAAAAAAAAGAAAAGAAAAGAAAACTGATTTCTCAGTTCAGGC
 >chr19:32461700-32462004 + E=5e-167
TATCTCTTCTCTCTGTTTGTAACACAAAAGACTTATGCCTCTGAAGGACGTTGTAGAGAGAATATTGCGATGGGAAACATACAACTTTG

AATTTCATTACATCACAAACTTCCTTCTCAAAAATATAACACCAGTTAGTTTAATAAAACATGGCATCTACGGACATACTTATCATGCA

GAGGTGCAATAAGAAACAATCATATTAACTGAAAACCA|AGCTCTTCCTTTCCCAGAGGGCTGGAGCCGATGGCCTCGATGACAGCCTA
 >chr19:32463793-32464113 + E=8e-181
GGCATTCAGTTGGCTTCGCCTGGAGGAAGAGGGAGGCAAACGTGCCTGAATGATTCTCCCCAGGAAAGGGAGAGAGTAGGACAACTTGG

GGAAAAAACGTTCCTGCAGGGCTGCAAAAATCAGGGAGAGGCGGCAGGGCAAGGAGACAGGCGTATGTATGTCTGTGTCTTTCAGCTAG

GCAGCTCAATCTCAGGTTATTTTATTTGACAAATAAAACTAAACTGCATATTTATGGACTAATGATGTGAGATATTGCTCTTTTATTCG

TAT
