# Supplementary material for: Chromothripsis during telomere crisis is independent of NHEJ, and consistent with a replicative origin
Source: HighWire-hosted journal article supplement (doi:10.1101/gr.240705.118), 2019-03-14
Supplement: Supplemental_file_1.zip [file contig.2.DB113_length_710_mean_cov_8.02394366197.docx]

**DB113_length_710_mean_cov_8.02394366197**

AAGACAGAATTCTATCTCAAATCTACCTTCAGTATAATGAGACATTAGATGTTAATACAGAATAACATACCCTTTAAGACAGAGGGCAA
 >chr11:103255465-103255745 - E=1e-156
ATTAAAGGCATTTTCAGATAAAAACTCAAGAGTTCACAACCAAAAGATACTTTCTACACTATAAGCAGATGCAAAGTGAAACCAAACAG

AATGTCTGAGATACAGGAAGAAATAAAGAACAATACAAGTGATAAACATGGGGCAAATCCAAATAAGCATTATGTACATGACTACAACA

ACAAGAAAGA|CAG|TGCTTTTATTAAGATTTTTAAAAGGAGAGGCCGGGCATGGTGGTTCACGTCTGTAATCCCAGCACTTTGGGAGG
 >chr11:103254125-103254532 - E=5e-215
CTGAGGCGGGCAGATCATGAGGTCAGGAGATGGAGACCATCCTGGCTAACATGGTGAAACCCCGTCCCTACTAAAAATACAAAAAAATT

AGCTGGGCGTGGTGGTGGGTACCTGTGGTCTCAGCTACTCGGGAGGCTGAGGCAGGAGAATGGCGTGAACGCGGGAGGCAGAGCTTGCA

GTGAGCCAAGATTGCGCCACTGCACTCCAGCCTGGACAATAGAGCGAGACTCCATCTCAAAAAAAAAAATAAAGATTAAAAAGGAGAAA

GAATTACAAAACAAACCACCCAAATCAAAAAGCAAAACATTAGAGAAAAAAACCAATAAAG|ACCGTGCAATCGAAAAGGAAAATCCTA

T
