# Supplementary material for: Chromothripsis during telomere crisis is independent of NHEJ, and consistent with a replicative origin
Source: HighWire-hosted journal article supplement (doi:10.1101/gr.240705.118), 2019-03-14
Supplement: Supplemental_file_1.zip [file contig.2.DB113_length_716_mean_cov_10.2234636872.docx]

**DB113_length_716_mean_cov_10.2234636872**

ACCTCAAGTGATCTGTCTGCTTCAGCTTCCCAAAGTGTGAGATTACAGGCATGGGCCACCATGCTCGGCCTATGTAGACAATGTCATTT
 >chr10:12358652-12359026 + E=3e-213
TAAAAAATGGAAGTAATTAAAAAGGGAAAGACCCATAGATTACATTATATAAAATGTAAAACATTTTTTGGTCAAAATATCATAAGCAA

AATTAAAACACATATTACAACAAACACCAATGAAATATATTAAGAGCTTTAAAAATATAAAACAGCTGGGCGCGGTGGCTCATGCCTGT

AATCCCAGCACTTTGGGAGGCTGAGGCGGGCGGATCACGAGGTCAGGAGATCGAGACCATCCTGGCTAACATGGTGAAACCCCGTCTCT

ACTAAAAGTACA|AAAAAT|GGCTACACAGAACTTGAGAAGGTGTGGAAGGGGACAGAATACCCTTATTCCCATTGGCTTGGGGGCTGT
 >chr10:13270569-13270916 - E=9e-193
GGGGATGGGGCAACTGTTTGCTGACTGTGTGGATATTAAACTCCTTTCCCTCCCTCCTCCTATTTGGGCATCACCGCACTGGTCTGTGT

TCTCCGTCTAAGCACCAACACTTAGGCTTAGCTCTGGCAGGATCATATTGGACAGAGTCCACACTCACTCGCAGGTGCCTTATATTCAC

GTCAATGTCCTGGCTCCAGGTCCTACTCCATCCTGGAAAATCAAGGCCTTCATTGACCTATTCAGTGTACTCAGCATCTTTACTGACTG

GCAGAA
