# Supplementary material for: Chromothripsis during telomere crisis is independent of NHEJ, and consistent with a replicative origin
Source: HighWire-hosted journal article supplement (doi:10.1101/gr.240705.118), 2019-03-14
Supplement: Supplemental_file_1.zip [file contig.2.DB113_length_721_mean_cov_15.0568654646.docx]

**DB113_length_721_mean_cov_15.0568654646**

GACCAACATAGCAAAACCCACTCCCTCCTTCATGA|GTAAAATAAAAATAATATAATTAATAAAAATACGAATAAGAACGCTTGGCCGG
 >chr10:12315738-12316019 + E=5e-150
GTGTGGTGGCTCACACCTGTAATCCCAGCACTTTGGGAGGCTGAGGCGGGTGGATCACAAGGTCAAGAGATCGAGACCATCCTGGCCAA

CATGGTGAAAACCCATCTCTACTAAAAATACAAAAATTAGCTGGACGTGGTGGGAGCCTGTAGTCCCAGCTACTTGGGAGGCTGAGGCA

AGAGAATCGCTTGAACCCTGGAGGCAGAGATTGCAATGAGCCGAGT|T|TTTTATCACCTGAAAAAGAAACCCCATACAAATTAACAGT
 >chr10:13281482-13281901 + E=1e-224
CACTCCTCATTTTTCCTAACCTCAAAGCCTTAGACAATCACTCTTCTTTGGTTTGTCTCTGGGGATTGGCCTATTCTAGACATTTCATG

TAAATAGAATCCTAAAATCTGTGGCCTTTTGTGACTGGTTTTCTTTCACTCAGCATAATGTTTTCAAGGCACATCCAGTTGCAGCATGC

ATCCATACCGCATCTTTTTTTTTTTTTGAGATGGAGTTTTCCTCTTGTCACCCAGGCTGGAGTGCAATGGCACAAGCTTGGCTCACTGA

AACCTCCGCCTCCTGGATTTAAGCAATTCTCCTGCCTCAGCCTCCTGAGTAGCTGGGACTACAGGCACCCGCCACCAAGCCTGGCTAAT

TTTTGTATATTT
