# Supplementary material for: Chromothripsis during telomere crisis is independent of NHEJ, and consistent with a replicative origin
Source: HighWire-hosted journal article supplement (doi:10.1101/gr.240705.118), 2019-03-14
Supplement: Supplemental_file_1.zip [file contig.2.DB113_length_743_mean_cov_12.8398384926.docx]

**DB113_length_743_mean_cov_12.8398384926**

CGTCTAAAAACAAAAAACAAAGAACAAACACGAAAAAACTTAGGCCAGGTGCAATGGCTCGCGCCTGTAATCATAGCACTTTGGGAGGC
 >chr1:21898158-21898578 + E=7e-238 p=9e-03
CAAGGCAGGTTGATCACTTGAGCCCAGGAGTTTGAGACCAGCCTGGGAAACATAGCGAGACCTCAATTCTACAAAAATTTTTTAAAAAC

TGGCCAGGTGTGGTGGCGCACACCTTTAGTCCCAGCTACTCAGGAGGCTGAGGTAGGAGGATCCACCTGAGCCCAGGAGGTTGAGGCTG

CAGTGAGTTGTGATTATGCCACTGCACTCCAGCCTGGGTGACAGAGCAAGACCCTATCTTAAAAAAAAGAAAGAAAGAAAACATTAGCC

AGGTGTGGTGGTGCCAGCCACTCAGGAAGCTGACGTGGGAGGCTTGCTTGAGCCCAAGAGT|TTG|GAAGGACACCAGAATCAGAAGCA
 >chr1:21899206-21899532 +
CCAGCATGGGACACATGGAACTTTGTGCCATGGGCAAGGAATGGATCATTCTCCTTATGTCACAAGTGAGAAAACGGAGCCCAGTGAGC
 E=3e-181
AGGAGGGACAATGATTCCAAACCTTCTGCTGTTTCGCTGCACAGGCCACCGTGCCCTTCAAATCCAACATGTAAATGCACACACACTCT

AGCGGCCCCATCGAGTCCAGGCTGTGACCCTCTGCCTTGGGGCCACAGTGCTGTGTGCTGAGCCCTGCAGGCTGGAGGCAAACTGACTG

ATGGATTTGAACCCCAGATCTGCCACTTCTCAG
