# Supplementary material for: Chromothripsis during telomere crisis is independent of NHEJ, and consistent with a replicative origin
Source: HighWire-hosted journal article supplement (doi:10.1101/gr.240705.118), 2019-03-14
Supplement: Supplemental_file_1.zip [file contig.2.DB113_length_746_mean_cov_11.654155496.docx]

**DB113_length_746_mean_cov_11.654155496**

CTGTCTCTCTCTTCTCCTACCCCTCCTTTCTCCCCTACTTTCTTCCTTTTGCTGTAGGTCCTTGAGAAAACTCTTGGTTCTTGGGTCTA
 >chr7:132960882-132961183 + E=3e-169
TGCCTTTAGTACCTAAAGGATAAAATGGGTTTGTAAGGAGTATTTTCATAATTGGCCAAAGGATGAACTGATCAAATAAGGGTTATGTA

GTATAACATTATAGTTATGTGGTTTTTAGCTGTATTTTTGAGATCACTCCTTTAATACCATTTAGTACTACTCTGTGATAAATAACAAT

AATTGCCACCACTTATTGAACACTGATTCTTT|GC|GCAGGGACCCTGAGCTGACCCCAGGCAAAGGTAGGATGGGCACATCCATCCAG
 >chr7:132826243-132826688 + E=7e-232
GCTGCTGACAGCCTCATCTGAGTCCCCCTGGAACTGATGTGCTCCAAACACCCCGATTCCCTGAAGCCAGACCTTGTGTCTTTGCTGCC

CTCTCCTCTATCAAAACTTGTTTTCAGACAGAATATCTGATGAACTTATTCAAACTGAAATGCTGACTTCCCTAGAATAATTATAACGA

ATTGTTCATTGCCTAGCTCCTTCCATTGGAATATAAGCTCCAGAAGGCTAGTGCTGCTTATGCCTTTACTTAACAGATTATCAATACAT

CTTTTTTGTTTTATTTTTATTTTTATATATTTATTTTGAGATCGAGTCTCCCCCTGTCCTCCAGCATGGAGTGCAGGGGCATGATCTTG

GCTGACTGCAACCTCCGCCCTCTGGGTTCCAGTG|CT
