# Supplementary material for: Chromothripsis during telomere crisis is independent of NHEJ, and consistent with a replicative origin
Source: HighWire-hosted journal article supplement (doi:10.1101/gr.240705.118), 2019-03-14
Supplement: Supplemental_file_1.zip [file contig.2.DB113_length_765_mean_cov_10.9803921569.docx]

**DB113_length_765_mean_cov_10.9803921569**

AAGACTTTCTTTAGTTTTGGCATTTTTAATGCTTTTTGGCAACAACTAACATACCCCACGAAAAATGGATTAAATAGAGGACTTCAAAT
 >chr12:41875755-41876227 + E=4e-269 p=5e-02
TCATTTTGATCATATCAAAACATTCCACAAATAACTGTTCCTAGCTTGGATCAGTGAATCACTGATGTCTGACCATTGGGTTGCCTTCT

CTTTCTTTTAGACTTTTCCTCATTGTCACAAAGGGGCTGCCACAGCTGTAAGCATCACATCTTCATGCAGCAAAACCTAAGGTGGAAAG

AAAGAGAAGGTGTTTTCCTTGTCATCTCTCTCTGATATCAAAATGAAAAATCCTAGATATGCCTCAGCAGATTCCCACAGAAATACTTT

GGACCAGTGTAGGATTGTATATGCTTGTAGCTATCAAGGAAGTTGGAAAAGAAAAATCTGAAATATTTAGTTTAGGATGAGAACTTGGA

TTCTACAACAAGGAAAAAAAGGAA|GAG|ACATAATTTACATGAGATCTAAAGCACAGCCTATATTCCAGCTCAGCCTTTAAATATTCT
 >chr12:41876880-41877176 + E=3e-163
TACCCTTTTATATTTTCCCCTCTTTATGAAAGAATAGATAGTAGGTGACCTCCACAACCAAAGTTGATCATTTCTTCTTCATTTTTCAA

TTTCCTTTTTTAAGGTTATCAAAAAGTAGCAATTCATTTTCATTCTGTCTATGAACTTACACAAGATCCTACACAGTAAGCTTACTAAA

AGAGAAGGATATCAAGAAGAGTGAAAAATAATATATCTCTTTTGAAATTTCTTAG
