# Supplementary material for: Chromothripsis during telomere crisis is independent of NHEJ, and consistent with a replicative origin
Source: HighWire-hosted journal article supplement (doi:10.1101/gr.240705.118), 2019-03-14
Supplement: Supplemental_file_1.zip [file contig.2.DB114_length_234_mean_cov_1.92307692308.docx]

**DB114_length_234_mean_cov_1.92307692308**

AAACTACTTTAAAGTTCATATGGAACCAAAAAAGAGCCTGCATTTCCAAGTCAATCCTAAGCCAAAAGAACAAAGCTGGAGGCTTTGTT
 >chr9:76756278-76756448 + E=2e-91
CCTGACTTCAAACTATACTACAGGCTTTGTTCCTGACTTCAAACTACCGACTTCAAACTATACTACAAGGCTATGGTAACC|CTATAGT

CT|ACCCTGAAGATTCAGACAAGCTAGATAAGAGTGAAAGATACTAACTACGAAGTTT >chr9:79554810-79554865 - E=7e-22
