# Supplementary material for: Chromothripsis during telomere crisis is independent of NHEJ, and consistent with a replicative origin
Source: HighWire-hosted journal article supplement (doi:10.1101/gr.240705.118), 2019-03-14
Supplement: Supplemental_file_1.zip [file contig.2.DB114_length_242_mean_cov_9.81818181818.docx]

**DB114_length_242_mean_cov_9.81818181818**

TAGGGTTCAAGTGATTCTTCTGCCTCAGCCTCCCGAGTAGCTGAGACTACAGGCTCATGCCACCACACCCAGCTAATTTTTGTATTTTT
 >chr2:127394444-127394570 - E=1e-64
AGTATAGACAGGGTTTCACCATGTTGGCCAGGAT|AGT|TTCGCCTAAGGAAGAATATGGTTTTCTTTGCTTTTTGAACATTACATAAG
 >chr2:127394227-127394346 - E=2e-60
TGGAATCATATAGTGTCTACTTATTGGAGTCTGGCTTTTCTCACTCAACTTATGTCCATAAAATTA
