# Supplementary material for: Chromothripsis during telomere crisis is independent of NHEJ, and consistent with a replicative origin
Source: HighWire-hosted journal article supplement (doi:10.1101/gr.240705.118), 2019-03-14
Supplement: Supplemental_file_1.zip [file contig.2.DB114_length_267_mean_cov_16.1161048689.docx]

**DB114_length_267_mean_cov_16.1161048689**

ATGTTGGGAAGTCGGGTAAAAAACTGACCAGCAAACAACAAATCACTGCCTGACATCCCCCCA|C|CCCCCCCCCCCCCCCCCCCCCCA
 >chr11:675850-675913 + E=1e-26 >chr2:33141456-3314165
CCCCCCCCCCCCCCCCCCCCCCCACCCCCCCCCCCCCCCCCCCCCCCCCCCCCCCCCCCCACCCCCCCCCCCCCCCCCCCCCCCCCCCC
3 - E=3e-74
CACCCCCCCCCCCCCCCCCCCCCCCCACCCCCCCCCCCCCCCCCCCCCCCACCCCCCCCCCCCCCCCCCCCCCTCCACCCCCCCC|AAC

TCC
