# Supplementary material for: Chromothripsis during telomere crisis is independent of NHEJ, and consistent with a replicative origin
Source: HighWire-hosted journal article supplement (doi:10.1101/gr.240705.118), 2019-03-14
Supplement: Supplemental_file_1.zip [file contig.2.DB114_length_285_mean_cov_3.0.docx]

**DB114_length_285_mean_cov_3.0**

TTACCCTCTTCCAGAATGAGATCTGGGCCAGCGGTGGATGCCGCCCCTCCAAGGAGAGAGGAAGCATCTCGCTGGTAGCTGGAACTTAG
 >chr11:85477523-85477706 - E=8e-69
GCAAGCCTCTTGGTGCTTCCCAAGCTGTGTAGTTAATAAAAGCCCATGGATATGGTGGCTTTTGCAGCAGCTTCATGCAATATCAGAAC

TCTGT|ACTG|CATCCAGAATCACGTTGAGGAGGCCGTCTTTGAAGTATAATGTCTGCTTGGTGCACCACAGGTACTCCTCCTCTGTTT
 >chr11:85568418-85568516 - E=1e-47
CGCCCTTCCAGGCGTACAAC
