# Supplementary material for: Chromothripsis during telomere crisis is independent of NHEJ, and consistent with a replicative origin
Source: HighWire-hosted journal article supplement (doi:10.1101/gr.240705.118), 2019-03-14
Supplement: Supplemental_file_1.zip [file contig.2.DB114_length_285_mean_cov_4.21052631579.docx]

**DB114_length_285_mean_cov_4.21052631579**

TGTCTGCTGCTAGCTTGTCTAGTTATTTTCATTATAATGTTAGGGTGTCGATTTTAGTTCTTTCCTGCTTTCTCCTGTGGGCATTTAGT
 >chr2:120379409-120379575 - E=9e-89
GCTATAAATTTCCCTCTAAACATTACTTCAGCTGTGTCCCAGAGATTCTGGTATGTTGTGTCTTTGTTCTCATTGGT|CATGA|CCATG
 >chr
TTGGTCAGACTGGTCTCGAACTCCCGACCTGAGGTGATCCGCCTGCCTTGACCTCCCAATGTGCTGGGATTACAGGCATGAGCCACCAT
2:120378506-120378620 - E=2e-57
GCCCAGCCAACCCCTGCTTT
