# Supplementary material for: Chromothripsis during telomere crisis is independent of NHEJ, and consistent with a replicative origin
Source: HighWire-hosted journal article supplement (doi:10.1101/gr.240705.118), 2019-03-14
Supplement: Supplemental_file_1.zip [file contig.2.DB114_length_339_mean_cov_7.65781710914.docx]

**DB114_length_339_mean_cov_7.65781710914**

GGCCCCTACCACTGGCTCCCCTGGCGCAGTCTCCTAGCTTGCCCTTTCCCTCATCTGATCCTGGCGCCTGGCCATTTGCCTGCAGAGTG
 >chr10:95577984-95578211 + E=2e-125
TAGGTTCTTGCCATCTGCCAGTCCCTTGTAGCCCTGCCTCCTTGCTCGATGTCACCAAACTGGTGCTTCTTGTGCCCTGATGCTGAAAA

CCCATCTAATCACAACCAATAATCTTCTAACACAAAAGCTTCCTCTGCT|CGA|TGAAAGAAATGTTCAATGAAGAAAACAAACCTTGA
 >chr10:117195600-117195709 - E=3e-
AATTCATTTTTTCTTTAAATAAAAGACTGATACTTAAAGTTTTTCAGTGATATAATAGTACTACCCTATGTCCG51
