# Supplementary material for: Chromothripsis during telomere crisis is independent of NHEJ, and consistent with a replicative origin
Source: HighWire-hosted journal article supplement (doi:10.1101/gr.240705.118), 2019-03-14
Supplement: Supplemental_file_1.zip [file contig.2.DB114_length_375_mean_cov_4.0.docx]

**DB114_length_375_mean_cov_4.0**

CCTCCTCCACATCCACCTCCTCCGCCTCCTCCTCCTCCTCATC|TCTCTCCGCGCACTACACATCCTCCTCCACCCCGCGGCGTCACTC
 >chr7:5352632-5352675 - E=2e-05 p=0e+00
T|TCTCCTCCTCTCCTCCTCTTCCTTCCTCTCCTCCTCTCCTCCTCCTCCTTCCTCTCCTCCTCCACCTCCTCCTTCCTCTCCTCCTCC
 >chr8:49105072-49105358 - E=6e-161
TCCTCTTCCTCCTTATCTTCCCTCTCCTGCTAGGAAGAGCATTAAATAGAACTTGAGATCTTCCCCCTGCTGTACCCAGCAGTTCTTTT

CTAACTGCCTGTGGAACAGTGTTTTGTGTTCGCCCTATTTACCAAAGACCAAAAATTGGTTTGGAGGCAGCTTCTACCTTCTCTTCTAC

CTTTCTAGTTAGTGGTAATTT
