# Supplementary material for: Chromothripsis during telomere crisis is independent of NHEJ, and consistent with a replicative origin
Source: HighWire-hosted journal article supplement (doi:10.1101/gr.240705.118), 2019-03-14
Supplement: Supplemental_file_1.zip [file contig.2.DB114_length_436_mean_cov_5.46100917431.docx]

**DB114_length_436_mean_cov_5.46100917431**

AAAGAAAAAGAAAAAGAAAAAGAAAAAGAAAACCAAAGGGACTCGTCCGCAGCGTTATCTGCTGGCGCCATCTTCCGGAAATAAGTTAG
 >chr20:43496323-43496589 + E=1e-148
CACAACAGGTCTATTTCTGTTTCAGCGGGGCGTGAGGGCACTGGAAATGCAGGCAAGGAGGGGAAAAGAGAGAATGAATTTTAGCAAAA

TCTCTCCATCTCCTCTGTCCTGGATCATCTAATTACTCTACCAAGATTATCATTTTAATGTAATAGTACTACTAACATGCTAGCA|CTT
 >c
|TGACATTCTCAAATAAGAAATGGAAGAATTGCCAAGGCACAGTGGCTCACGCCTGTAATCCTAACCCTTTGGGAGTCCAAGGCGGGGG
hr20:43497578-43497744 + E=4e-63
GATCACTTGAGGTCAGGCGTTTGAGACCAGCCTGGCCAACATGATGAAACCCCCATCTCTACTAAAAACACAAAAA|TTAGGC
