# Supplementary material for: Chromothripsis during telomere crisis is independent of NHEJ, and consistent with a replicative origin
Source: HighWire-hosted journal article supplement (doi:10.1101/gr.240705.118), 2019-03-14
Supplement: Supplemental_file_1.zip [file contig.2.DB114_length_515_mean_cov_7.28155339806.docx]

**DB114_length_515_mean_cov_7.28155339806**

AATTTGTAAAGCACTCCTTGCTGTGTAAAGCAGTTATCACAGTGCTTGGGCACATAGATTTCAATGAAAGCTAGTCAATATCATTCTTA
 >chrX:11736093-11736404 + E=1e-175 p=4e-02
GGATTTTCACGATTATTCTGCTTGAAACTTCAGCTTTGAGAATAAAGCAAACTTCATCAAAGGAGTATGTAGACATAGTTAATTTTCAC

GTGTTACTCCCAGTCAGGGTTTCTCAACCTTTGCAGGACTGAAATTTGGAACTGGACAATTCTTTATTGGGGGAATGACCTGTACATGG

TAGGATGTTGATCAATGTCACTGGTCTCTACTCATTAGAGTCT|A|TATGTTTTTGCTTTCCTTCACGATTAGTTTAAAATCATATTGG
 >chrX:11737096-11737301 + E=9e-112
AATTTAAAGGAGGATTTAGCAGAATATCAACTTCTGTGAGAAAATGATGAAAGGAAAAACAATTGGGTCTTTTGAATGAAACAGGTTGC

TGCGGGTGGCTATAACAAGTAAACCACTTAAGTTCAATGGCTAAATTAAACAAGACAGGAGCTTAATTCTCA
