# Supplementary material for: Chromothripsis during telomere crisis is independent of NHEJ, and consistent with a replicative origin
Source: HighWire-hosted journal article supplement (doi:10.1101/gr.240705.118), 2019-03-14
Supplement: Supplemental_file_1.zip [file contig.2.DB114_length_529_mean_cov_8.73724007561.docx]

**DB114_length_529_mean_cov_8.73724007561**

ATGTTTCTCTTCTATTCCGTGTGAAATTCAGTCTATCCCCAGAGTGGTCACTAGGCATACATTCTCACCTCTTCTCTTTCCACTAACAT
 >chr18:49857579-49857878 + E=2e-165
GACCATAAAAAGCCATTTTCTTAGTTTCTCCACTCAGGCCTACTTCCTCACAGAGTTGAGCTCTAACAACTTGCAATTCTTTCCAAACC

ATTAAATATACATACAGATATGTATGTGTATATATATATATACACGCACACACACACACATATATAATATATATATACACACACAGATA

GATGTATATTTAATGGTTTGGAAAGAGTTGCA|T|AAAATCATAAATTTTAAAGTGGGAAAATGCACTTATTAAATAGAATCCTTGTTT
 >chr18:49859935-49860164 + E=4e-123
TTAATTAGTTTAATTAGAATGCTTCATGTTGTAAAATGTATATATTCTCCTTAACCTGGATTAAATAATAAAAGAATTAATTGACCCCT

ATAAGTGAGAAATCCAAAGGCAGGGATGGCTTTAGGTTAGATGGCTTATTCCAATGACCCAAATAATGTAACCAAAATCTCAGTTT
