# Supplementary material for: Chromothripsis during telomere crisis is independent of NHEJ, and consistent with a replicative origin
Source: HighWire-hosted journal article supplement (doi:10.1101/gr.240705.118), 2019-03-14
Supplement: Supplemental_file_1.zip [file contig.2.DB114_length_547_mean_cov_5.7550274223.docx]

**DB114_length_547_mean_cov_5.7550274223**

TAGCCAGGCGTGGTGGTGTGTGCCTGTAATCCCAGCTAATCAGGAGGCTGAGGCAGGAGAATAGCTTGAACCCTAGCTAGGAGGCGGAG
 >chr8:49019884-49020117 - E=1e-128 p=1e-03
GTTGCAGTGAGCCAAGATCGCACCATTGCACTCGAGCTGGGGCAACAAAGCAAGATTCTGTCTCAAAAAAAGAAAAGAAGAAGAAAACA

AAAAGCCTGTGTACATCAAGGTAAAAAGTTCAAGTCACCCATAAGTAGAGGCAGC|CCCAGAGAATCA|TGCCCCAGAGAATCATGGGC
 >chr8:49104520-4910
TGTTCTCCAAGAAACTGGAAACTAGAGTGCTCACTCCCAGGCCTGAAGCACACAGTTTTCTCATGAATGCCTCTCTGTTGTGTTTTGTA
4822 - E=4e-170
TGATTTTGCCGCATGACATTTGTAGTAATTCAGGCCTGTTCAAGTTGAATTCTTTGCAAGTTGCCTTATTCTCCCTTTCCTGAGATTTT

GTACATATTGTTTTCCTGAGTAATGGTATTTCTAAGTTAATTTCTTCTAATCAGAGCTACCAAAATGTACGTGCTTTCAGTAAACTCCT

ATTTGGTTTTGTTTT
