# Supplementary material for: Chromothripsis during telomere crisis is independent of NHEJ, and consistent with a replicative origin
Source: HighWire-hosted journal article supplement (doi:10.1101/gr.240705.118), 2019-03-14
Supplement: Supplemental_file_1.zip [file contig.2.DB114_length_561_mean_cov_10.3172905526.docx]

**DB114_length_561_mean_cov_10.3172905526**

TGACAAGTTTCCCCAGCTCTCTCCCTCCTGCATGCATACAGGTGGGGTACTTTCTTACACATCTACATTGTCTTACGCATTTGCAGCGC
 >chr3:150620617-150620873 + E=2e-142
TCCACAGTCTGCCACTTAGAGAGTCTGTCCTATCCTACCTTCTATAGTGAGTTATTTGAATGTAACTCACTCCCTCAAATTTCACTGTC

AAATTGAAGAAGTGAATAAAGAGAGACTCAGAGTTTGGGAGGAAAGGGCTGTACTGCCACAAGTGTCCTTGAAG|AATA|TAACAAAGT
 >chr3:150240
CTTCTCGGAAAAATTCCTATAAAATCCAAGGTTAGAACATTTGGAAATAGCAAAAAAGATTATTGGGTATCTCAAATGGAAAACTAAGC
523-150240832 + E=2e-174
ACTATTTAGAACCCACCTTTCAGGTTATCTGATTGTACCTTTCCATTGCTTTTGAATTATTTTACAACTCTGTAAATTGTCAATAAGTG

ATAACAATGCAAAGTTAGTGTTGTTTACAAAGACATTTTGTTAGAGATCCAATTTTCTGCCCCCTGTTGAAAAAGTCAGTTTCTCCATC

CATTTGTAAATTCATTTCAGTATTGCTTT
