# Supplementary material for: Chromothripsis during telomere crisis is independent of NHEJ, and consistent with a replicative origin
Source: HighWire-hosted journal article supplement (doi:10.1101/gr.240705.118), 2019-03-14
Supplement: Supplemental_file_1.zip [file contig.2.DB114_length_585_mean_cov_11.7401709402.docx]

**DB114_length_585_mean_cov_11.7401709402**

ATATATCCAAAATAAAGGAAACTAGTGTGTCAAATAGATATCTGCACTCCCATGTTTATTGCAGGTCTATTCACAATAGCCAAGATATG
 >chrX:115622503-115622710 - E=7e-113
GAATCAACCTAGTGCTCATCAATGGATGAATGGATTAAAAAAGATATACACAATAGGATTTAGCCTTAAAAAGAAATAAAAGCCTATTA

TTTGCAGCAGCATGGATGAAACTAGAGGA|TACT|AGTTGGTATCCTGAAACTAAATCTAAATCCCCTTCTAAAGAAGGGTGATAGATA
 >chrX:115620659-115621033 - E=2e-213
TCCACAAAGATTGAGCTATATCCCCACAATACTCATTCCTTTTCTCCTTGGTAGTATACCATAAATTTTGGTTGAGCATATTGGCCACT

TAGAATAAACATAGTATTTCTTAGCTTCCTTTGCAGTGAGCTTTGGCCATGTAACTATACTCTCGCCAGTAAAATGAAAGTGGCACCAT

ACACAATGTTTGGGAAATGTACTTAAAAGGGAGGAGGCATGTCCTTCTTTACTTTTTCCGCAAGTGTCGTAGCTGAGAGCAGTTCAGCA

AACATTTTGGACAATGAAGTTGAAGATATACGTTGAGGATGAAAAAGAAACTG
