# Supplementary material for: Chromothripsis during telomere crisis is independent of NHEJ, and consistent with a replicative origin
Source: HighWire-hosted journal article supplement (doi:10.1101/gr.240705.118), 2019-03-14
Supplement: Supplemental_file_1.zip [file contig.2.DB114_length_606_mean_cov_10.8910891089.docx]

**DB114_length_606_mean_cov_10.8910891089**

CATCAGTAGCAAGAGGAGGCAGGTGACACTACACATCTTCACCTGGAAACCCTTTTCTCCAACTGGCTGAAGTGGACCCGGGCTCCTGG
 >chr17:8133569-8133912 + E=1e-191
AAGTAGTCCTAGTGAGGGAGGCAAGTGTGGGTCTTCTATATATACATCCAGGTGAGGGGGGAATTCACATTCAGCAGTCTCAAGAGCGA

CTGTTAGCTTCACACACCTTCTCATGGCCCCCGTGTTCCCTATAGAAGGAAGGTGGGTGTTAGTAGGATCTGCGAAGTCCACAAAGTCC

CATCACTCTATTTCATACCTTCCCCACAAAGGAAGGGTCATTACCCAGTTTCATCCAGAGAGACGCCACAAGGGG|T|CTCACACATGG
 >chr17:8077
AGGAAAGGGCTGGGTAGGGGAAAAACCTTCAGGTTTAGGGCCAACCTTCCTCCCTCATCCCCAAATATTGGATGCTACCACACCTGCAG
742-8078006 + E=4e-147
AAGACAAAAATGTACCAATACGTAGTGCACTCCCAACGCTCGAATATGAAGAAGGACAGGGCCACGGATGCACTACAGTGAGCCCCAAT

GGCTTGGGAAGGCACGAGATTAAGGAAAGTCTTTGGATCGACAGACAGTGATGGGTCAGAAAAGGCCAGTGGTG
