# Supplementary material for: Chromothripsis during telomere crisis is independent of NHEJ, and consistent with a replicative origin
Source: HighWire-hosted journal article supplement (doi:10.1101/gr.240705.118), 2019-03-14
Supplement: Supplemental_file_1.zip [file contig.2.DB114_length_621_mean_cov_9.4847020934.docx]

**DB114_length_621_mean_cov_9.4847020934**

CACAGTATCTTATCTTCACTTTTAACTCTGTAAAGTCCAAAATCAGGCATAATCTCAGTAATTTTTATCCACTAAACTTCCTTCTGTAG
 >chr10:85172658-85173027 + E=2e-207
ATGTTTCTATCCTTGGAAATATTTATGGGTACTTTAATGTGAATTAGGAAGAGAGCTTTCCTGACATTTTCCCACAAATTATCAGCCTG

CTATGCAAGCAAGTAGAAAGTTACACAATGAAAATGAAGATGCTAGGTTTCCAAGCCTAAGGATCAAATTTAGAAATATGAGTATATTA

TTTACCAACTAAAATTGAGAAAATGTTACATAGAAATTCTAAGATCAATAAGCAGATTGATCTGCATGTAAAAGATGAATATAAGCAAT

AACAATCATAG|AG|CCTCCTGAGTAATTAGGATTACAGGCAGGCATCACCACGCCCAGCTAATTTTTGTATTTTTAGTAGAGACGGGG
 >chr12:7463408-7463662 - E=4e-138
TTTCACTACGTTGGCCAGGCTGGTCTCAAACTCCTGACCTCAAGTGATCCACCCACCTCAGCCTCCCAAAGTGCTGGGATTACAGGTGT

GAGCCACCGCACCCAGCTATTAGGTAATTCTTTTCTGAGTAAGAGCCCAGATCAACTGACAGTGTTCCTGAGTCCTTGGAGGCAAAGAG
