# Supplementary material for: Chromothripsis during telomere crisis is independent of NHEJ, and consistent with a replicative origin
Source: HighWire-hosted journal article supplement (doi:10.1101/gr.240705.118), 2019-03-14
Supplement: Supplemental_file_1.zip [file contig.2.DB114_length_661_mean_cov_4.99243570348.docx]

**DB114_length_661_mean_cov_4.99243570348**

TCATTGTATCCTAATATACAAATATATTAGAATTAATTTGATCTATTCTGCCACCAATGGACATTGGATTATATCCAGTTTGGGGCAAT
 >chr2:127393850-127394187 - E=5e-191 p=8e-03
TATAAGTAATGTTGCTATGAAAATTCTTGTGCATGTACATGTACCCTGGTGTTCAGGTACACACATTTCTGTTGGATATGTATTTACAC

AGATATATACACACATGCACACACTATACATTATATATACATACTATATATAATATATGTGCATACTATACATATTATGTATACACATT

ATATACATAATATATACAGATACTACACATACTCTATGTATAGACACATACACAATGTACATA|ATATACA|TATATATATATATAGAC
 >chr2:127392988-1273933
TGGGGAATAGTAGGTGCCCAATAAGTGGTGACTGTTTTTACCTCGTATCTTCACTTATTAGTGGTAAAGTCACCAATGGAAACAAAGCA
19 - E=2e-178
GACAGAGTTCCAGCAGACTGTGAGGAAGCAGCAGGAGTCTTGAGGGTTCACTGCTGAATGGTCCCCTGGGATAGCTTGTACTGTTGTGC

AACAAATATTTACTCTTCCCTTCCCCAGCATGAGCCCAGTGCACTGCCTTACCCTAGTCCTCTGGGATTTGCTTTGGCTGGGGGAATGT

GAGTGAACATGACCTGAGTGTATCCCAGCACAGTTTGGAA
