# Supplementary material for: Chromothripsis during telomere crisis is independent of NHEJ, and consistent with a replicative origin
Source: HighWire-hosted journal article supplement (doi:10.1101/gr.240705.118), 2019-03-14
Supplement: Supplemental_file_1.zip [file contig.2.DB114_length_664_mean_cov_10.6174698795.docx]

**DB114_length_664_mean_cov_10.6174698795**

CTTCCCCTTCCACCATAATTCTACCTTTCCTGAGACCTCCCCAGCCATGCTGAACTGTGAGTCAATGAAACCTCTTTCTTCCATAAATT
 >chr16:83042167-83042526 - E=3e-204 p=3e-02
ACTCAGTCTTGGGCATGTCTTTATTAGCAGTGTCAGAATGGACTAATATAGAATAATCTGTGAAGATGAAAGGAAGGAGGGAGAAAGAG

AGGAAGGCCTCGTTCTGGCACAGGCCACCATGATCTTCTGCCTGGGTTACGGTGGTAAGCTCCTCACTGATTTCCCAATCCCTCATCCA

CCCATCTCCCACACCCAGTGGTCTCAACACAGCAAAGGTCCAAGTATAACATTATGTTTGTGTCACTCGTCTACTGAAAACCACCTAAT

T|AG|CTTCTGTTTTTGTAGCATTCTTTATTACAGCTGTTAGCCAATATCCTAACTGATTTGGATGCCCAGGTCTGAGCTGGCATAGTG
 >chr16:83037702-83038009 - E=6e-173
TTTTGTGAATTCAAAGTTCTTCCTTTTGAGCCTCCAGAGCCTTTGGCAGCATTCTATGACCCTTTCCTCCTGCTTCCCTATCTTTATCC

CTGACTCCTACAAAACCCGCTGCAAGGGAACACAGATACTCACGGTATAAGGAATGGGATTCAGCTGGCCTGGGGCTGTAGGTTTCTGC

TGGTCGGACTCAGTATTCTACAGTTGCATTCATTAACCCAAGA
