# Supplementary material for: Chromothripsis during telomere crisis is independent of NHEJ, and consistent with a replicative origin
Source: HighWire-hosted journal article supplement (doi:10.1101/gr.240705.118), 2019-03-14
Supplement: Supplemental_file_1.zip [file contig.2.DB114_length_743_mean_cov_10.9448183042.docx]

**DB114_length_743_mean_cov_10.9448183042**

AACTTTCTTTTATAGAACCACAGGGAGAAATTGCAAAAGGGAAATTAAACAGAATTAAAAGGTAAACTAGAAAAAGACATTAACAATAT
 >chr12:80031866-80032267 - E=1e-224 p=2e-03
GTTGGACAAAGATTACCATTCTTGTTATATACTGCTTTTAGAAGTACTAAGAAATGAAATTGACAGACAACATCAGTGAAGAAAATGAA

GATACATAAATATATAAAGCCAATAAAAATATGACAAAAGTTTATCCTATTAATTAGGATTCAGTGAAACCCCTATTTGCCTAATATAT

TTGGTGAGAGTTGAAAAAATAAGGGTGAGACCAATCTTACACAAGCTTTCTGGGGCAATATTGGCAGTATTTTTTTTTTTTGAAACCCA

AAAGCTGTACTCTGAAGAATGACAGTATGTTTAAAGAGCC|ATAA|GAGAAGCAAGTGTATGTGGGGGGATATTAAGTTCCATTTCATG
 >chr12:80338178-80338474 - E=3e-166
TATGTTAGGCTTGAAGATTTCATGTCAGTAGGCAGTCGTGTAAATAGGTATGGGACTTAGGTGCAATATTTTGCCTTGAGGTGGGGATC

TGAGAAAAATTAAATAGAAAAAAGAGCTAAAGATGAAATCCTGTGAAATAAGATGTACGCAAAGAAAAAGGGGGCTTATAATAGGAGTC

TGAAAAAATTAGAGAGTTAGGAAAACCCAGAAGAAAGTAGTGTCATGGAAGACAAGGCGAAAATTTCCAGA|AGATCGGAAGAGCACAC

GTCTGAACTCCAGTCACTCCGGAGAATCCCGTAT
