# Supplementary material for: Chromothripsis during telomere crisis is independent of NHEJ, and consistent with a replicative origin
Source: HighWire-hosted journal article supplement (doi:10.1101/gr.240705.118), 2019-03-14
Supplement: Supplemental_file_1.zip [file contig.2.DB114_length_1098_mean_cov_10.7559198543.docx]

**DB114_length_1098_mean_cov_10.7559198543**

GTTTGTAAAAATTACCTATTTTTGTTCCCCACCGTGAAATTTTTTATTGTGGAAGTAACCTGTGCTCGTGGAGTTTTTATGGTTCAGAA
 >chr21:46380412-46381026 + E=0e+00
GTGCCTGCAGTGGTATGTGAAATCCTTCCAGGCCTTGCCCGCGGTGAAAACAGTGTCTGCGCATAGCGGCGTGGGTGTGGGCAGGGCCC

CTGGTGTCCCCAGACCCTTTCAGGCCTGTGGCTCCCTCTTTTCTGAGGTCAGTCTTGCCACGTGCTCCCAGCTGCACGTCTCCGCAGGC

TGAAAGCCACACTTCCCACTCAGGTTGTTTTGGAGTATCTCCTTATTTTTCGTGATGCTGGATATTTGCCAGTGTTTTTCTAAGATTGT

TTCTCGTCAAAATTATTTTGTATTTTTCGGTTATCTTTTTAGTGTGATTCTGCTGACTTTGTGAAATTAATTTGGAATATTTTCTTTTT

TATGTTATCTGCTTTATTTTTTCCTTGGAGGTTTTAAAGAAAATGTATGTTTTTCAGAGGTAGGACCTAGAAAACTTTGTCAGTTTCTT

TTGTGATTATTAGTTTTATGGTTTCTATCCCTTTTTGGATATTTCTTAGGGAAATGATTCATTCCTCCATTTTC|TTTTTC|CCCAAAC
 >chr21:46376
GGCCTGTCCCACGATGCATTTCAGCTTGCATTCACCCAGAAGGCGTGGCGAGAAGAACCTCGGCACCACGAGATGCTGCTGGCATGTGC
312-46376802 + E=1e-279
CGCTTCAGCTGGTGACCTGGGTGGTGTTGGCAGCATCTGAGTGGCTCTGTAGGCCGCAGCATCTCCCGGCACCCGAGCCCGAGATGAAG

CAGCACGTGCCAGCAGCATCGCGTAGTGTGTTCTGTCCTGAGCCTCATGCAGATCTTTGTGGAGTGAGAATCAAGGCTTGTTGATGGCG

TGCACGGAAAAGCCGGTCTCATGCTGATTTTCCTTAGGGTCCATCAGAACACGTGCCCCGTGAACCGTGTCACCCCACAGCCCAACTCT

GGTGAGCCTGGTTCTGTGTCTGCTGACCTGGTGAGGGCTGGGGACCAGGTGAGTTGCCTGCGGCACAGGCGTGCTGTGTAGCTGCCATG

TGTGGCTTCCTCCACTGAGGCTGGTTTACCGC
