# Supplementary material for: Chromothripsis during telomere crisis is independent of NHEJ, and consistent with a replicative origin
Source: HighWire-hosted journal article supplement (doi:10.1101/gr.240705.118), 2019-03-14
Supplement: Supplemental_file_1.zip [file contig.2.DB115_length_262_mean_cov_19.0877862595.docx]

**DB115_length_262_mean_cov_19.0877862595**

CATATACACATATGTGTATATATGTGTACATATACATATACACATATGTGTATA|TATGTGTATATATACATATACACATATGT|GTAT
 >chrX:147662539-147662618 - E=3e-18 p=0e+00 >chrX:147662429-147662632 - E=5e
ATATGTGTGTATATATACATATGTACACATATGTGTATATATGTGTGTATATATACACATGTTTGTGTGTAGGAGGTGCATATATGTAT
-90
ATATTTGTGAGAGAGGGAAGAAGGAAGCAATGTGGTACAAATGTCAACATAGGAGGAATCTGGGTAATAGGGATATGAGAATTCTT
