# Supplementary material for: Chromothripsis during telomere crisis is independent of NHEJ, and consistent with a replicative origin
Source: HighWire-hosted journal article supplement (doi:10.1101/gr.240705.118), 2019-03-14
Supplement: Supplemental_file_1.zip [file contig.2.DB115_length_289_mean_cov_3.63321799308.docx]

**DB115_length_289_mean_cov_3.63321799308**

GTCAGGATTTTAAACATGCTTGAGAGTTTCTCATGAATACCATCAGAAGAGC|AGCT|TAATTTAATTATGGAAAAGGTCTTTATAATT
 >chr9:19659826-19659882 + E=2e-22 >chr9:19592241-19592478 + E=9e-132
TTTTTGCCCTTGATATCACAACTTTTCTACCATTTTCTCCCTTATACAAATGAACAAGGATTGACTTTTTAAATAGTGGTGAAATTATT

TTTCTGGAAATGTCTTTGGTTAAATGGCAGAGAGTTTAGGACAATACAATGGAGACAGCTTTCCCCACATATTGCTTCATTGCAAGATA

TTAGTTGGGATATCTACCGACCTA
