# Supplementary material for: Chromothripsis during telomere crisis is independent of NHEJ, and consistent with a replicative origin
Source: HighWire-hosted journal article supplement (doi:10.1101/gr.240705.118), 2019-03-14
Supplement: Supplemental_file_1.zip [file contig.2.DB115_length_361_mean_cov_4.57617728532.docx]

**DB115_length_361_mean_cov_4.57617728532**

CCAACAGGGTGAAACCCTGTCTCTACTAAAAATACAAAAAATTAGGTTGATGTGGTGGCACGCGACTGTAGTCCCAGGTACTTTATAGG
 >chr10:113427213-113427445 + E=5e-100
CTGAGGCAGGAGAATCACTTGAACCCAGGAGACAGAGGTTGTAGTGAGCCAAGATTATTCCATTGCACTCCAGCCTGGGCAACAAGAGC

AAAACTCCATCTCAAAAACAAAACAAAACAAAACAAAACAAAACAAACAAACAAA|CAAAAACT|TATATATATATATATATATATATG
 >chr10:113427968-113428
AGTTTATTAAGTATTAACTCACACGATCACAAGGTCCTACAATAGGCCGTCTGCAGGCTGAGGAGCAAGGAGAGCCAGTCTGAGGTTCT
088 + E=8e-61
AAAACTG
