# Supplementary material for: Chromothripsis during telomere crisis is independent of NHEJ, and consistent with a replicative origin
Source: HighWire-hosted journal article supplement (doi:10.1101/gr.240705.118), 2019-03-14
Supplement: Supplemental_file_1.zip [file contig.2.DB115_length_406_mean_cov_5.54187192118.docx]

**DB115_length_406_mean_cov_5.54187192118**

TTCCAATACTGGCCACGTATTCCAAAGCACACACCAGGCAGAAAGTTACTTAGATATTCAAATCACCTCCACTCCCAGTTTACTTCATA
 >chr18:37746711-37746821 + E=1e-54
TTCGCCCCCAGCCTTCTCT|GA|CTTCAAATGTGATTCATCCATTGTGTGACACTGCTTCTCAAATTGGTGATTAACTGCCTATGTGAT
 >chr18:37748229-37748527 + E=4e-168
CACCTGCAAACAAAAGGTTTGAAGGTATCAATTCTAGTTTTAGTTCTGCTGCTACCTTTGGTCTTGTTTTCTAATATTGTGATCCTCAA

GATCCTTCATTAAAAATATGCACAGTGATATTCTCTTCCATTTATTCCTGTTGTCCTATTTACCATAACTAATGGGGGTGATAACTATT

TACTTTTGCTGTGGACTGAATGTATATGTTCTTACTAAATTCATATGTTGAG
