# Supplementary material for: Chromothripsis during telomere crisis is independent of NHEJ, and consistent with a replicative origin
Source: HighWire-hosted journal article supplement (doi:10.1101/gr.240705.118), 2019-03-14
Supplement: Supplemental_file_1.zip [file contig.2.DB115_length_454_mean_cov_5.88766519824.docx]

**DB115_length_454_mean_cov_5.88766519824**

AAAAAAAGAAAAAGAAAAAGAAAATTACCAACAAATAAAAGTCAAGGACCAGATGAATTCACAGCAGAATTTTACTAGACATTCAAGGA
 >chr3:118286983-118287201 - E=1e-116
AGAATTGGTACCAATCCTTTTGACACTATTCCAAAACGCCGAGAAAGAAGGAACCCTCCCTAAATTGTTCCATGAAGCCAGTATTGCCC

TAATACCAAAACTAGGACAGGACATAACCGAAAAAGAAA|G|TCTTGTGCCAGTTTTCAAGGGAAATGTTTCCAGCTTTTGCTTATTCA
 >chr3:118179407-118179644 - E=4e-128
ATATGATATTGGCCGTGAGTTTGCCATAAATAGCTCTTATTATTTCGAGATATAGTCCATCAATACCCAGTTTATTAAGAACTTTTAGC

ATGAAGCGTTGTTGGATTTTATGGAAAGCTTTTTCTGCATCTATTGAGATAATCATGTGTTTTTTGTCATTGGTTCTGTTTATGTGATG

GATTACATTTA
