# Supplementary material for: Chromothripsis during telomere crisis is independent of NHEJ, and consistent with a replicative origin
Source: HighWire-hosted journal article supplement (doi:10.1101/gr.240705.118), 2019-03-14
Supplement: Supplemental_file_1.zip [file contig.2.DB115_length_474_mean_cov_6.32489451477.docx]

**DB115_length_474_mean_cov_6.32489451477**

ATCAGTGGCAGAGCTGGGACGAAACCCCAACGTCTCCTGAGGCCCAGCCATGAGCTAGTTTCCCATTCTACCACATCCTCACTTTCATG
 >chr3:66540179-66540413 + E=3e-129
ACTTTAAGAAAATTAATTTTTTCCTCTCAGGTGAATCATTTTTATGCCTCTTTGGGCAAGCACCCCTTTAAGAAACTCCATGAAAACGT

GGTCTCCTTTCTGTCCAGAAAGACATTCTGAGCACCACGACTTCACATAAAGTTTC|AAATATTTTATA|AGCCCCTCACAGACTTATA
 >chr3:65967181-659
AAATATTATATGAGAGACTGTATTAGATATATGTGGTTAGTACTTCATATGGTTTGGCTGTGTCCTCACCCTTCTCATCTTGAATTGTA
67409 + E=1e-125
GCTCCCATAATTCCCACGTGTTGTGGGAGGCACCCGGTGGGAGATAACTGAATCATGGGGGTGGTTTCCCCCATATTGCTCTGGTGGTA

GTGAATAAGTCTCACAAGAACTGATGGTTTT
