# Supplementary material for: Chromothripsis during telomere crisis is independent of NHEJ, and consistent with a replicative origin
Source: HighWire-hosted journal article supplement (doi:10.1101/gr.240705.118), 2019-03-14
Supplement: Supplemental_file_1.zip [file contig.2.DB115_length_503_mean_cov_7.45526838966.docx]

**DB115_length_503_mean_cov_7.45526838966**

CAGAAATATTTGACTCCTTCCTGCCCCTACCTCTAGGCACTGACTCATTTTATTAATCTCATTAAATTCAGGAAGCTTTTGGATCATCT
 >chr6:103449683-103449892 - E=3e-114 p=4e-02
TCCAAACTAAATTAATAAAAAACTTAATTCTTCTCAGATTTAAGAGATCTCTCATGCAAGGAACTATATAATTTCCTGCTGTGCTTTTG

TAGAGCATTTGACCAATATTAGTATGATATT|AGTATGATA|TTGTTTAATAACATTTCAAATTTGTTAGTTGGCATCCCCATGGACAA
 >chr6:103270945-103271200 - E=7e-133
AAAGTTGATATTATAATATTATCCTAGTTAATCACCATAACTCCATCAAACATTATGTAGACTATAACAGTATACTAGGCAAATCCTGT

GCCTCTATGCAAGAGACATAAAGATATTTTCCCATTTTGAAGAAATTATATAATAAGAAAAATAATGGGAAGGAACAGTATTAAGCAAC

AGCTGAACATTGCTGACAAGGCCAGACAAG|AAAAGACAGTAGGGGAAAAAAGCAAAAAAA
