# Supplementary material for: Chromothripsis during telomere crisis is independent of NHEJ, and consistent with a replicative origin
Source: HighWire-hosted journal article supplement (doi:10.1101/gr.240705.118), 2019-03-14
Supplement: Supplemental_file_1.zip [file contig.2.DB115_length_535_mean_cov_14.5757009346.docx]

**DB115_length_535_mean_cov_14.5757009346**

AAAGGATTCATCAAATTCTCTCTATGGCTATCACAGTACATGTAGGACTGAGTACAATAGACTCTAGGGTCACATAAATCAAGGTAAAA
 >chr4:156937297-156937576 + E=3e-156
ATTTGTTAAGTCACTCTTTCTGTAAATAATATTATAGTCAAAAACTGTCAAACTCCTGATTAAAATTTTTAACCCCAAAAAAGGAACAT

TTAAGTATATTAACAAAAACTAGTGTTTTATTGGATTCAGTGAATTCTAAGTTCGTATGTATTTTCATTCTTGACACTCTGCTCTTTAA

AAAGTGT|TTTCA|TTCCACACCAAACACTAACTAATCCCACAATTTTTAAAGTACAAGTTATCCAACAGTGCTGGGTTTGTTTCTTTA
 >chr4:156938857-156939118 + E=2e-142
TCTCTAAAAGATTTGATCCAGATCAGAGATTTTCTAATGTTGGTCTGCTAGCCACTGCTGATCAGTATGAAGTTTTCATCAGTCTGTTA

CATCTTCTGCAGAAATTAAATCATTTTTTTCTGAAGTTAAATTGGCTGAACATAAGCATTTAATGTTTAAGATTATATACTTATTATAT

TTT
