# Supplementary material for: Chromothripsis during telomere crisis is independent of NHEJ, and consistent with a replicative origin
Source: HighWire-hosted journal article supplement (doi:10.1101/gr.240705.118), 2019-03-14
Supplement: Supplemental_file_1.zip [file contig.2.DB115_length_555_mean_cov_9.18918918919.docx]

**DB115_length_555_mean_cov_9.18918918919**

TGATAGTTCCAGTTCATCCATGTTCTCATAAGCACTCTGTATGAACAGTCTTTTTAAGTTTAGCCATTCTCATCAGTGTGCAGTCATAT
 >chr13:27190370-27190623 + E=1e-140
CTCCTGCGGTTTTAATTTGCCTCTCCTTAATGACTAATGCTGTTGAGCATTTTTCATGTGCTTGCTTGCCATCTGCATAACTTCTTTAG

TGAAGTGTCTGTTCAAATCTTGTGCCCATTTTAAGAAATTGGGTACTTTATTATAGATTTTCAAGAATTCTTTA|T|GTGATTCAATTA
 >chr13:27192
AACCTCTTTCCCTTCTAAATTACCCAGTCTTGGGAGTATCTTTTTAGCAGTGTGAAAACAGACGAATATGAAGTCTTAGCCATTAATAG
151-27192454 + E=1e-170
TGAGTTCACCCATTAACACTTACTGTGATTATTTGGAAGGCCATAGTCACTATTAGTGCCTCCTTTTTGTTAAAAAAATTAATACTTTC

TTGTCCATTGCTGACTTTATTACAATTTTTTCCTGTAATGGTTTGTTATTTATATATCCAGTATCTTCTAGTTGTTTGTACGAAATCAA

AATATTGATCATGCAGATAACAC
