# Supplementary material for: Chromothripsis during telomere crisis is independent of NHEJ, and consistent with a replicative origin
Source: HighWire-hosted journal article supplement (doi:10.1101/gr.240705.118), 2019-03-14
Supplement: Supplemental_file_1.zip [file contig.2.DB115_length_584_mean_cov_10.7174657534.docx]

**DB115_length_584_mean_cov_10.7174657534**

AAACGGGCTGCTTAACTAAGGAGGAATGAGGGAATCAACTGGTCGAGATAGTGTCTATCTAGAAATATCTGCATGACTGTGGTGAAGGG
 >chr16:79611211-79611524 + E=1e-176 p=1e-02
TCAATTGATACCTTAATTGCTTTGTGCCTGAGTCTCCTAATCTGTGTGAAGGAGATTAGAATATCTGCCTCTCTATTCATTGTTACAGG

TCAAAGATGGCATAGATCTGGTGTCCAGGAGACACTCGGTGCATGGTAGCTGTTGTCATCATAGCCCATGGAGGTTTTGGGTGACCTCC

AAAGGGCAGGGCTTCGGGAACATCACTGTCTTCTGCTCCACGGAAG|CAGAGAGTCACACCATGCTTTCTTCAGTATTAATGAATCCAA
 >chr16:79612221-79612492 + E=2e-151
AGGCTAAATGCCCAGGACTCAGGTGCATGCCGATATTTATATTGATACTCATGATCAATTTCTTCTCTACTTTCACACGATGTATCATT

TTTCAAATGTAAAGATTTTATTATGTAGTGCTTTGTTTCTAGATAGAATTCTATAGCTCTATTCATTTCTCATATTAACAGGATAATAT

TTAAATTTGAAAAAAACAGACATGGAAATATAAAATGAGAAAACTACAAGA
