# Supplementary material for: Chromothripsis during telomere crisis is independent of NHEJ, and consistent with a replicative origin
Source: HighWire-hosted journal article supplement (doi:10.1101/gr.240705.118), 2019-03-14
Supplement: Supplemental_file_1.zip [file contig.2.DB115_length_588_mean_cov_7.84013605442.docx]

**DB115_length_588_mean_cov_7.84013605442**

CCTAACACTTTGGGACGTTGAGGCTGGAGAATCACTTGGGCCCAGAAGTTCAAGACCACCCTGGGCAACATAGTGAGACTCCTATCTCT
 >chr3:65970201-65970493 - E=8e-157
AAAAAAAAAAAAAAGAAAAAAAAATTAGCAAGGCATGGTGGTGCATGCCTGTGGTCCCAGCTACTCCCGAGAGTAAGGCTGAAGTGGGA

GGATCACTTAAGCTGGGGAGGCTGAAGCTGCAGTGAGTGGTGATCGTAACACTGTACTCCAGCCTGGGCGATAGAGTGAGACCCTGTCA

CACACACACACACACACACA|CA|TCAGTCACAAAGGGCTTCAAATGTAGATTTTTGGCACTGGTGCCTACTGAGCTTAGATATACAGT
 >chr3:65968179-65968480 - E=2e-169
CACTATAATGGTGACTGAAATGACAATACAATCATTACGATGTTACACATGAGCCCTATTACCAGACCACACACTCTACAATACAAGAC

ACTGATAATTAATATTTTTTATGAGACCATAATTGTCTCGTAATGGCAGTCACTCCACGTGGCATATTATGTAGGCATTAAAAGCATTG

ATTTATTAGGTATTGATATTTAAAATATACCATCATTTTTACAGCTGTATTCTGGC
