# Supplementary material for: Chromothripsis during telomere crisis is independent of NHEJ, and consistent with a replicative origin
Source: HighWire-hosted journal article supplement (doi:10.1101/gr.240705.118), 2019-03-14
Supplement: Supplemental_file_1.zip [file contig.2.DB115_length_592_mean_cov_7.09459459459.docx]

**DB115_length_592_mean_cov_7.09459459459**

GATACCTAGTTGTCCCATCAGCATTTATTGGAAAGAGTGTCATGTCTCCACCGCATTGTCATCTTTGTCATAAATCAGGTGACTGTGTA
 >chr19:30438904-30439301 + E=3e-224
AGTAGATCAGTTTCTTGACTGTTCTGTTGGCTTGTCTGTTCTTGCAGCAAACCTACACTGTCTAAATCATTATGACTTTGTGTTATCTT

GGTACCTGGTACATGGTGGTGTAGTTTTAGTTGTGGTTCCTCAAGATTGCCTTTATTTTCTCCTTTCCAGTCCGTATGCTGTTTCTTTC

TTTTTCTTGCTTTTGATACTTGCCAGTTCAAGTGCTGGTAGTGGGCATCAGGGGTCAACTTTTAAACATTTACCATTAAGTGTGGTATT

TACTGTGAGTAATTTTTGTATTTGCTTTTATCAGATTAAGG|CA|TCTTTCTGTAGCTGGATAACTCTTAGATCTGATTCATCAACCTG
 >chr19:30447289-30447482 + E=2e-104
CTGAACAGTTCCTTTTTCAGAGACATAGATACCATCCAAAAATTTCCTGATATCCTTGTTTTTAACTGTTGTGGGTTGCTGAATCAAAG

CTGCTGAATTTGAAACAAGCTCAGTGTCATTTCCTTCAAGGATTAATTCATCTTTCTGGG
