# Supplementary material for: Chromothripsis during telomere crisis is independent of NHEJ, and consistent with a replicative origin
Source: HighWire-hosted journal article supplement (doi:10.1101/gr.240705.118), 2019-03-14
Supplement: Supplemental_file_1.zip [file contig.2.DB115_length_619_mean_cov_9.88045234249.docx]

**DB115_length_619_mean_cov_9.88045234249**

TAATGACGTACTGACATGTACTACCACATGGATGAATCTCTAATGCATTGACCCAAAAACCTACCGTATGATTCAATTTACGTGACATG
 >chr2:163017019-163017339 - E=7e-181
TTCAGAACACGTAAATCCATAGAGACAGAGTTCAAAGTAGTGGTTGCCACTGGGTGTGGGGAGAGAGATGTGAGGAGAAACTTCTTACT

GAATATGGGTTTTTATTTTGAAATTATGGAATTGTTTTGGTACCTAATAGAGGTGGTGGTTGCACACATAAATGTACTAAATGTCACTT

AATTGTTCACTTTAAAAGGATTTATTTTATTATGTAAATGTCACCTCAATAAT|AAA|ATATCCAAAATTCGTGGATCTGATTCTTAAA
 >chr2:163016050-163016346 - E=
AAACAGAATCTCCACTGTCGCTTTGGAAAGCAGTTGGCAGTTCCTCAAAAAGCTAAACATAGAGTTAGCATATAAGCCAGCGATTCTAC
2e-163
TCCTAGGTATTTACCCAAGAGAATTAAAAACATAGTCCAGACAAAAATTTGTGCATGAATGTTCCCAGCAGCATTATTCATAATGGCCC

CAAAGTGGAAACCACCCAGATGTCCATTACTGATAGATGGGTAAACTAGATGTGGTAAATAGCATACAATGGAATCATTTCAACCGT
