# Supplementary material for: Chromothripsis during telomere crisis is independent of NHEJ, and consistent with a replicative origin
Source: HighWire-hosted journal article supplement (doi:10.1101/gr.240705.118), 2019-03-14
Supplement: Supplemental_file_1.zip [file contig.2.DB115_length_633_mean_cov_14.691943128.docx]

**DB115_length_633_mean_cov_14.691943128**

TTAAGGGGGTGATTATCTTTCAAATAATCTTTCACATACAATTGTGTATTTATCTGAACATCTACTTATTTATGTTTTTGACCTCAATC
 >chr2:222529940-222530313 - E=9e-213
TAGCCAGGACTACAGATTCTTAAAGTAAATGCACAATAAAAGTCAGTGTTAGTCCTCACTTAGGGTGTGATGAAAGTATAAACAGGTCT

GTTCTCTTTATTTGTGATACCTAAGCCTTTGTTACAGGTTGATATGGTTTGGCTGTGTCCCTGCCCAAATCTCATCTTGAATTCCCACA

TGTTGTGGGAGGGACCCAGTGGGAGGTAATTGAATCATGGGGGCAGGTGTTTCCTGTGCTTTTCTTTTGATAGTGAATAAGCCTCACAA

GATCTAATGGTTT|GATA|GTTATTTTAAAAATTGCTGCTACATCTGCCCTTTACCACTATTTAGGCTTCTCACCAGCTGCCCATGAAT
 >chr2:222529129-222529393 - E=4e-147
TCTCAGTGATAATGAGCTGTGGGTCTCTGAGGGCTGCATTCAATTCCATAAGTGCCCTGTGACATATTATCAGGGCTCATAGAGATGAT

AGCTACATCCAATTTATTTTACGTAATCTCCCTATTTTATGGTGGCTTTTGGTTCTCCAATCACAATTGCTTCTTATTTTAGATCATTT

GTCTAAATGTCA
