# Supplementary material for: Chromothripsis during telomere crisis is independent of NHEJ, and consistent with a replicative origin
Source: HighWire-hosted journal article supplement (doi:10.1101/gr.240705.118), 2019-03-14
Supplement: Supplemental_file_1.zip [file contig.2.DB115_length_638_mean_cov_6.26645768025.docx]

**DB115_length_638_mean_cov_6.26645768025**

TAG|CAAACTCCAACAGACCTGCAGCTGAGGGTCCTGACTGTTAGAAGGAAAACTAACAAACAGAAAGGACATCCACACCAAAAACCCA
 >chr10:1272364-1272603 - E=5e-129 p=4e-02
TCTGTACATCACCATCATCAAAGACCAAAGGTAGATAAAAGTACAAAGATGGGGAAAAAAACAGAGCAGAAAAACTGGAAACTCTAAAA

ATCAGAGCACCTCTCCTCCTCCAAAGGAATGGAGTGCCTCACCAGCAATGGAACAAAGCTGGATG|TCTTAAAACATCCAGCTTT|GTG
 >c
TCTTAATCACTGTAACGTTATAGTGAGTCTTAAAGTAGGTTCAGAACCTCCAGCTTTGCTGTGGCCCTTGTAAATGTTTTGCATTTTTA
hr10:883142-883519 - E=4e-215
TATGAATTTTAGAATCATCATTACAATTTTTCAAAAAGTCCTGTTGGTGTTTTTATTGGGATTGCATTGATTGTATAAATTCACTCGAG

AAGAATTCACGCATTCTACCAGTGTTAAGTTTTACAACCCACAAGCACAGAATATGTCTTTATGTAGGTCTTTAAAATGTTCTTTTGGC

AGTGTTTTGCAGTTTTCAGCATATGAGTCTTTGATGATCTTTTGTCAGATTAAGATATAAAAACTAAGTTACAGTCATGCACCAGTTAC

CTTTCTTGTAGGGTGAGC
