# Supplementary material for: Chromothripsis during telomere crisis is independent of NHEJ, and consistent with a replicative origin
Source: HighWire-hosted journal article supplement (doi:10.1101/gr.240705.118), 2019-03-14
Supplement: Supplemental_file_1.zip [file contig.2.DB115_length_686_mean_cov_7.43440233236.docx]

**DB115_length_686_mean_cov_7.43440233236**

GAGTTGGGTTTTATTTTTGGCTAAATCCCAGCGAGTCCTTG|TTATATTGGGCCCCTTGAATAAGGGTACCTTTGGGGGCCATTTGTCA
 >chr4:78698338-78698676 - E=2e-175 p=0e+00
CCTACTTCATACATAGCACATTTGATGAGTTTTATGTCTAGCTGGTCATCATTGATGATTGTTCAGTGATTATTTTGGCAGTTATAGCA

GGAAGATGGCACAGTATAGTTATGTGCTGCATAACAACGTTTGGATTGCCTAACAATGCATTTCTCAGAACATGTCTTTGTTAAACCAC

ACATGACTGTGCTAGTTTTGATTAGGGTGGCCATGTAACTCATCCAAATTGGACTCTTTTGAGCATGAAAAGGGATGATAATAATAATT

GCTTCAGAACAACAGATATAAACCA|TGGTGATGATGTAGATGAT|ATGTACCATGGTGATGATGTAGATTCTAATGTTAGGGAAGCTG
 >chr4:78696408-78696695 - E=7e-161
AAGGAGGGGTATATAGGAACTCTCTGTGTTATCTTGGTAACTTTTCTGTAAATCTAAAATTATTACAAAATTTAAAGTTATTAAAAATA

GAATATAAGTATTTTTCTTTTATGAATTGGTATAATACAGATTATATATAAAATGCCATTTTTTCCCCAGTAGGCATTCATTTGGAAGA

GTTAAACCCCACATTGTAATGTCAATAGCAAGAATTACTTGCACATTTAGCTAAAAGGTAACTGGG
