# Supplementary material for: Chromothripsis during telomere crisis is independent of NHEJ, and consistent with a replicative origin
Source: HighWire-hosted journal article supplement (doi:10.1101/gr.240705.118), 2019-03-14
Supplement: Supplemental_file_1.zip [file contig.2.DB115_length_753_mean_cov_7.37051792829.docx]

**DB115_length_753_mean_cov_7.37051792829**

TTACTGCCAAATACTTGGTTCACACAGTTATCCCAGGCCCTCCACACAATAGCTCTGTGCCTTTTCTAAGCTTGACCTTCTTTATCCTA
 >chr14:30312932-30313318 - E=2e-220
AAATAGGTTTATTTTTCTCACTATTAGTATCTTGATGATAAATGAGATTATATTTATACATTTTTTACTACAATACTGGATCCAAGGTT

GACATGCTTAATTGCCTTCAAGTCTGCTCGAATGTCATCTTTTCATTGAAGCCTGTCCTGCAGCTGTGTTTAAGTTGCAAACAACTTTT

ACTATTACTCTTAATCTCCCATACTGTTTTCTCTATAACATTTACCATTTTCTAACATACTTTATAACTCATTTATTTATTATTAGGTC

TATTCATTATGTGTTACTCTGCACCAGAG|T|AGGACTTCAATACACACATTTTGGGGATAAACAATTCCGTTAATAATACCTTCTATT
 >chr14:30311910-30312278 - E=1e-203
TCTCTGGCTGGCTCTTTCTATAAGTTGCTTGGTTGGGATGATTTGTTTGAGTTTTTGTTTACCATTTCACTTTTGGATACTGTCTTTTT

CATGACCTTTTGCTCCAAAGTTTGAGTTGCCAGCCATTCTTTCTTCCCTGCTATACCCGCTCCCCACATTTAACCCTCTGCCTGGTCCA

TACTCCCAGGAGTCTTTCAGAAAAAGCGGTTCAAAGGAAAGACTATTTTCATGCTTGGTATGCTCATAATCCTGTAGACATATCAGTTT

GGAGGCTAACATGTGTCAACTGATGGACAATTAGCATACAGAA
