# Supplementary material for: Chromothripsis during telomere crisis is independent of NHEJ, and consistent with a replicative origin
Source: HighWire-hosted journal article supplement (doi:10.1101/gr.240705.118), 2019-03-14
Supplement: Supplemental_file_1.zip [file contig.2.DB115_length_766_mean_cov_10.3785900783.docx]

**DB115_length_766_mean_cov_10.3785900783**

CTTGTAGTGTTTCATCATCTCTTGTTGGGTTCATTTTATCCCGGCTCACACTTTGTCAATATTCCCTTAATTAACCTCTACTCAATCAA
 >chr4:44237604-44238016 - E=3e-231 p=3e-02
GAACTTTGAGTGTCTGTGTCTTGCCATGACCTTGACTGATACAGGGACTCATTGTAATCAAGGTGAAAGCTGTGCATAAAACTGAAGCC

TGCAATGTTTTGTAGTATGTTTGGGGGAAGATTGACTCATCACTCTTTAAACAAAAAGATGTGCTATATAATTGAGAGATATATGATAT

TATTTCTCTGTTAAATCCTATGTACTACTTAAAATAAGTTGGTCATGAATAAGATATTAAATAAAACTATTATTAGTAGACTGAAAGCT

GCTTTGTCAGTTTCTGCAGACAGTGGATTTTACTCATACTCTCTCTCTCTCTCTC|CACTGTCTCC|TTTTCCACTTTCCCACTCCAAC
 >chr4:44234625-442349
TTTAGCTCCTCAAAGACAACAATTTTCTACTTATTCACTAGTTTGTTTCATCATTTATGTCCACATTTCTAGATAATAAGCATCTAATA
69 - E=6e-191
CTAGTTTATTTAAATAATTAATTTAAAATAAGTATAAATAATATTGTAATGTACTTATATCTCAACTTAGAAATAAAACATAGCAGCTA

CTGTTGGATTGCTGTTTCCCCAAAGGAAACTATTATTCTGTTTGTTGTTTATGATTTTTTATTAAGCTAGCATTGTAATAGCTCAATCT

ATTTATTTTTGTCATATCTCAGAAGATAAAACTAATGCAAAGTTGATTCTTCTATT
