# Supplementary material for: Chromothripsis during telomere crisis is independent of NHEJ, and consistent with a replicative origin
Source: HighWire-hosted journal article supplement (doi:10.1101/gr.240705.118), 2019-03-14
Supplement: Supplemental_file_1.zip [file contig.2.DB115_length_798_mean_cov_13.3458646617.docx]

**DB115_length_798_mean_cov_13.3458646617**

AATGCCATGCTAGGGAGTTTAAAGATTTTTGCCAAAATGAAATGATGTCACCAGAAATAGAGCATTACCTGTCTGCCTGGTGTGCATTA
 >chr9:125865028-125865428 + E=9e-229 p=0e+00
GGTGGACAGAAGAGGGAGACATAGCAAGTAGAAGACTGTTTTAATAAATAGACCAGGCAAGAAATTAGATCTTAACTAAAAGCTCCCAA

ATCTTTAGGCATTTCAGGCATTTCTATGCCAGTTGGAGACTGGGGGAATTCCCCGAGGCCTCTCCAGAGTAAATAGACTGCATTCTTGT

CTTGGTTCTCCTCTGGGGAGCCAGTGTCATTGACACCAAGCCCAGCATCCTCATGCACACTGTTCCTCTTGCAGGACTTGGAACACCAT

TTAGGGCTTGCCCTCAATGAGGTGCAGGCAGCCAAGAAGACGTG|AA|AAACTGGGTAATTAGGTTGCGGCCATGCCAGGGAGTTTGGA
 >chr9:125868704-125869100 + E=2e-226
GCTGATAAGGAGTCACTGGAGAGTTTTAACCCATTTATGCCAGAGGTTACAAATTTTTTTGTGTGAAAAATCAGACCTTGGCGATGACC

TTAAGCAGTAGGATATAAATAACTCCCACAAGCTTAGCGTTCCAATAATGGAACACTAGGCATAAATGGGTTAAGCTAACTTGCACTTT

GAGTGGTTCCCTGCTGATCCTTTAGGAAGAAAAATCGGGAGGAGAAGAAATTAAGGGTGTGAGCAGAGGTGACAGATGATAGAATAAGG

AATGGAGAACGGAGTCAGTGAAATTTAGGGAGAGTGACGACACACCAGGAAGATGATAAATTTAGCTGTCGGGGTATAGATTTGAAAT
