# Supplementary material for: Chromothripsis during telomere crisis is independent of NHEJ, and consistent with a replicative origin
Source: HighWire-hosted journal article supplement (doi:10.1101/gr.240705.118), 2019-03-14
Supplement: Supplemental_file_1.zip [file contig.2.DB115_length_819_mean_cov_31.5653235653.docx]

**DB115_length_819_mean_cov_31.5653235653**

CCT|TTCTCTTTTTCTCCCTCTTCCCCTCTCTCTCT|GCCTGTGCCTGTTCTCTCTC|TCTCTCTCTCTCTCTCTCTCTCTCTCTGTCT
 >chr3:89661231-89661263 + E=2e-01 p=0e+00 >chrUn_gl000220:128991-129761
CTCTCTCTCTCTCTCTCTCTCTCTCTCTCTCTCTCTCTCTGCCTTTCTCTCTCACTGTGTCGGTCTTCTGTCTTACTCTCTTTCTCTGC
+ E=0e+00
CTGCCTCTCTGTCTGTCTGTCTGTCTCTCTCCCTCCATGTCTCTCTCTCTCTCTCTCACTCACTCTCTCTCCGTCTCTCTCTCTTTCTG

TCTGTTTCTCTCTGTCTCTGTCTTTCTGTGTGTCTGTCTGTCTCTCTCTCTATTTGTCTTTCTCCCTCCCTGTCTGTTTCTCTCTCTCT

CTCTCTCTCTCTCTCTCTCTGTCTGTCTGTTTCTCTCTATCTCTCGCTGTCCATCTCTGTCTTTCTATGTCTGTCTCTTTCTCTGTCAG

TCTGTCAGACACCCCCGTGCCGGGTAGGGCCCTGCCCCTTCCACGAAAGTGAGAAGCGCGTGCTTCGGTGCTTAGAGAGGCCGAGAGGA

ATCTAGACAGGCGGGCCTTGCTGGGCTTCCCCACTCGGTGTATGATTTCGGGAGGTCGAGGCCGGGTCCCCGCTTGGATGCGAGGGGCA

TTTTCAGACTTTTCTCTCGGTCACGTGTGGCGTCCGTACTTCTCCTATTTCCCCGATAAGCTCCTCGACTTCAACATAAACGGCGTCCT

AAGGGTCGATTTAGTGTCATGCCTCTTTCACCGCCACCACCGAAGATGAAAGCAAAGATCGGCTAAATACCGCGTGTTCTCATCTAGAA

GTGGGAACTTACAGATGACAG
