# Supplementary material for: Chromothripsis during telomere crisis is independent of NHEJ, and consistent with a replicative origin
Source: HighWire-hosted journal article supplement (doi:10.1101/gr.240705.118), 2019-03-14
Supplement: Supplemental_file_1.zip [file contig.2.DB116_length_301_mean_cov_4.98338870432.docx]

**DB116_length_301_mean_cov_4.98338870432**

ATGGTCTATTAAATATAGAGACAGCTCAGTGGGGCTGCAATATTCTCTCACAATAAACAAAGAGTGTTTGCTGCCAATAAAATATTATT
 >chrX:37920579-37920728 - E=2e-78
TATGCTTCCGTTTTGAAAACCACTCCATGAATAGCAAACAAGATACTTCCAATACTGAGA|AGTGT|ACTAGCAGATTAGTTGATGGCA
 >chrX:37919309-379194
AAATGTGTGAATACACAATCTCCTTGGATCTTGAATTGAAAAGTATACCTCAGTAATTACCTTGTATTGATATTTAGATAGATATATTT
56 - E=4e-68
TGATAGTGATATTTAGAAGTTAAAGATAAAATTCTT
