# Supplementary material for: Chromothripsis during telomere crisis is independent of NHEJ, and consistent with a replicative origin
Source: HighWire-hosted journal article supplement (doi:10.1101/gr.240705.118), 2019-03-14
Supplement: Supplemental_file_1.zip [file contig.2.DB116_length_303_mean_cov_3.9603960396.docx]

**DB116_length_303_mean_cov_3.9603960396**

ATTCTTGGTTTTGTACTGTCCTAAATGGCAATGTGACTGAGGGCAAGTTATTTAAACCTTTTCATCACACACATCATTTGTAAAATATA
 >chr4:163087563-163087757 + E=1e-105 p=4e-02
TAGGTTATCCTGTTATCTCCAAAATTCATTACATGCTTGTCATTCTGTAATTTTATATTAGACTTCAACCTATTTTATATATATATATA

ATTTGGAATCAC|TATA|TATATGGCATCTTCTTTACTTCCATTACTTTCTTACTTTCTATCTCTTGCTCCCTTGGGCCCTTTTGTGCT
 >chr4:163087884-163087996 + E=4e-56
CTCCACATATGTTTTATTTCATTGTAATGTTCTATTT|T
