# Supplementary material for: Chromothripsis during telomere crisis is independent of NHEJ, and consistent with a replicative origin
Source: HighWire-hosted journal article supplement (doi:10.1101/gr.240705.118), 2019-03-14
Supplement: Supplemental_file_1.zip [file contig.2.DB116_length_309_mean_cov_5.82524271845.docx]

**DB116_length_309_mean_cov_5.82524271845**

GCTAGAGAGGCTACTATCAGGAAGTGAAATGGATCATTTCTAATGGTAGGTCTCCATTGCCTACATGGTATTTCTGAGAGTGGTATCAG
 >chr3:21457820-21458066 - E=5e-134 p=7e-03
GGTGTCCAGTGAAAGATGGATAGGTTGACATGTCATGCTCATTTGGCCTAAAGGTTGTTACTGCCAGGAATGGACTTACAACTTACCAG

AATGTGAATGGTGACAAAAGGCAGGTTCTACTCTGGAAAAATATGTGTTATTTTATT|AGAAGTTCATG|CAGGTCATGAAGAGTCACA
 >chr3:21457434-21457508 - E=3
GAGTTTAAAGAATTCTCTGGTTGGGTCATCAATGTTCAGATGTCe-33
