# Supplementary material for: Chromothripsis during telomere crisis is independent of NHEJ, and consistent with a replicative origin
Source: HighWire-hosted journal article supplement (doi:10.1101/gr.240705.118), 2019-03-14
Supplement: Supplemental_file_1.zip [file contig.2.DB116_length_332_mean_cov_6.04819277108.docx]

**DB116_length_332_mean_cov_6.04819277108**

TCTCTGGTAGACATGGTGGAGTGGTAAGTGCACCGACATTTCTCACATCCTGGAGGAAGCTGTGAACATTCTGAGGACTACTGCCGGCT
 >chr9:138348189-138348475 - E=4e-152 p=0e+00
TCAGTGCCCCTGTTGGGATTTTCATGGATGATCCTGGGGAGGGCGGCTTCGCCTTTCTGAAACACCTTCTCCTGGTGGAGGTGGCCCAA

TCCCCCACCCTGTAACTCCATCTCTCCCCTCATCTCTCCCCTCCCCTCCATCCCTCCCCGACCTCCATCCCTCCTCTCACCTCCATCCC

TCCCCTCACCTCCCTCCCT|TCCCCTCCCCTCCCTCCCTTCCCCTCCCCTCCCTCCCTCCCCTC|AC >chr8:109988350-109988397 + E=1e-09
