# Supplementary material for: Chromothripsis during telomere crisis is independent of NHEJ, and consistent with a replicative origin
Source: HighWire-hosted journal article supplement (doi:10.1101/gr.240705.118), 2019-03-14
Supplement: Supplemental_file_1.zip [file contig.2.DB116_length_377_mean_cov_4.84615384615.docx]

**DB116_length_377_mean_cov_4.84615384615**

GGAGGAAGGGAGGAAGGGAGGAGGGAGGAAAGGAGGAGGGAAGGAGGGAGGAAGGGAG|GAGAGAAGGAGGGAGAG|AGGGAGGGAGGA
 >chr20:4008980-4009037 - E=1e-06 p=0e+00 >chr8:21390
AGGAAAGGAAGGAAGGAAGGAGTGAGGACTACTGCATTTGTTGCTGCCTCTGAAGGAGCCCAGACAGAGCTGATGGCCCCTGCAGCAAG
33-2139334 - E=9e-160
CGAGACCTACTGTTCACCTGGCAAGGTCCTGTTGTTTGACCAATATTGTCTCCTTCAGTCCTCACAAGTTACAATATATCAGCAAATTG

GAATGGTTTTCATAAGAATAAGTAAAGGAAACATTAGTCATTTATTAAAGAACACAGCAGACACGTGGCCTACTATTATGAGTTATTTG

CATTGTGAAGAAGGATATGAGTA
