# Supplementary material for: Chromothripsis during telomere crisis is independent of NHEJ, and consistent with a replicative origin
Source: HighWire-hosted journal article supplement (doi:10.1101/gr.240705.118), 2019-03-14
Supplement: Supplemental_file_1.zip [file contig.2.DB116_length_427_mean_cov_5.26932084309.docx]

**DB116_length_427_mean_cov_5.26932084309**

ATGCTCATTCTCTTTGGACCCAGTGTTTCCTTACTAGGGATGGAAATTAGGGGTGGAGTGATGGAGTGGGAGGGGGTGAATTGTATGAT
 >chr9:23004466-23004682 + E=2e-118
CTAAGGTGTTATCCTCTCCTCTGATTCCTACACCTCATGCATATTTGGAAGCCGCAGAAACATTGTTGTGGCCCCTGAGTTGTTCTACT

TGCCCTATGAAAGTGGTAGGCTTCACACAGACAACAAT|C|TTGATGGTCTGTAAATATAAGAGGTGTGTTCTTCCCTCTTTTCTTTCT
 >chr9:23008691-23008901 + E=7e-106
AAGTGTAACAATTGATTAAAAATGAAAATGCATGCTTTTCAATTGAAATGAATGTTATCAACACAAATATCACTCCAGATACAGCTCAA

TCGAATCAAGCCAAAATAAATGTTGCCAAACTAAATTGTTTCATGTGTTTTCTGGTCTCCTTTCATATGTCTA
