# Supplementary material for: Chromothripsis during telomere crisis is independent of NHEJ, and consistent with a replicative origin
Source: HighWire-hosted journal article supplement (doi:10.1101/gr.240705.118), 2019-03-14
Supplement: Supplemental_file_1.zip [file contig.2.DB116_length_433_mean_cov_6.58198614319.docx]

**DB116_length_433_mean_cov_6.58198614319**

TAAACTATATTATTAAAATACGATAAAAGGAATGAAGTAAACAAACAAGGGCACATAAGTAAAAACAGATTAGCAAGGCAAGAATTTTC
 >chr13:54772513-54772738 - E=6e-121
TGAAGAGTTGCATTTAATTTGGGAACAGAAAGCTTGAGGTATTATGAAAGAGAATTATACAATTTGAAATTTAAGAGTGAGTCATGGGC

TAGATTATCCAGGCCTTTGCTGAGCTTGGAAGTTTGGCTTT|TATCTG|TCTCCTTAGATCAACGTAAAAAGCAATAATGGGACTGTGC
 >chr13:54771073-54771287 - E=3e-117
ATCCTTTTGAGCTTTTCTATTACCAGTTAAATTTTAAATTCCTTTTACAAATACTAAGAAAATTATATAGTCATGTGAAAAATTAATAG

AATGAACAAAGAAAAAGAAATACATATCACTTCACTGCTCTGCTTGCCTTTAAAGATATATCTGAGAGAATCATTTGGA
