# Supplementary material for: Chromothripsis during telomere crisis is independent of NHEJ, and consistent with a replicative origin
Source: HighWire-hosted journal article supplement (doi:10.1101/gr.240705.118), 2019-03-14
Supplement: Supplemental_file_1.zip [file contig.2.DB116_length_459_mean_cov_3.90849673203.docx]

**DB116_length_459_mean_cov_3.90849673203**

ATGAACCACCACCTCCTGGCTAATTTTTTGTATTTTTAGTAGAGACAGGGTTTCACCATGTTGGCCAGGTTGGTCTCCAACTCCTGACC
 >chr10:21734980-21735193 + E=1e-116
TCAAGTGATCTGCTTACCTTGGCCTCTCAAAGTGCTGGGATTACAGGAATGAGCCACCGCACCCAGCCTAGACAATTTTTAATATCAGC

AATTTTTCAACACAGTTCTTTTTCCTTTCCTT|TTC|ATCCTGTACTACATTTGATACTTTGGCCCCAAAAAGTAAGTATTGAAAGTAA
 >chr10:21733727-21733976 - E=2e-138
TGGTGGAGGGGGAAATCTCTGTACTCCAGGAATTTACAGTCTGGTTTGGGAGCCAATACTAATAATCGGAAAAGAGTAAAAGACTCTAT

GATTAAGAGCTAAGCCATGTGTTAGAGACTATAAGTATACAGGAAATCAGAGGGTAAAAATCACAGCAGGCTTCATAGATCAGTTAAGA

ACTCAGAGCTTCTAGT
