# Supplementary material for: Chromothripsis during telomere crisis is independent of NHEJ, and consistent with a replicative origin
Source: HighWire-hosted journal article supplement (doi:10.1101/gr.240705.118), 2019-03-14
Supplement: Supplemental_file_1.zip [file contig.2.DB116_length_517_mean_cov_5.79883945841.docx]

**DB116_length_517_mean_cov_5.79883945841**

ACATAATTTGATTTCAAATTATATAAAAGCATGCTTTATATATTAAAATGTCAGTAGATTCATCTATTTAATCAAGTTTCTTATTGGTT
 >chr11:80570441-80570648 - E=6e-110
GACTATTGTACCAAACACTTAGCTAGTCACTGAGGATTCAATGGGGAATGAAGTGGACATGGTCCCTACGTTTGGAAAATTTATTATTT

AATGGTGAAACAAACATTAAAAAACAG|CA|TGTACAAATGTTTCCATTCAAAACTTACATTCTAGTGTGAGTTTCCCTGGCAGATCAA
 >chr11:80571551-80571863 + E=3e-176
GTGCTCATCTTATATATATATATTTTTTCCATTTTCTCTTTCAGATTACTTCCCAGATTTTCAACACCATCTATCCTCCTCTCTGTCTG

CCAAGCCTTTTATTTGATATTTAGCATATGACATTAACTCCATGGCTAATTGACTTCATAAGACATAACCAAAATGAGGTGTATTTTTC

TAATGAAAGACCACATTTGAAAATGCAAAATAAGATAACCTATAATAACAATGACTCATATCTGGGGAAGCAGC
