# Supplementary material for: Chromothripsis during telomere crisis is independent of NHEJ, and consistent with a replicative origin
Source: HighWire-hosted journal article supplement (doi:10.1101/gr.240705.118), 2019-03-14
Supplement: Supplemental_file_1.zip [file contig.2.DB116_length_541_mean_cov_8.40295748614.docx]

**DB116_length_541_mean_cov_8.40295748614**

CCGGCTAATTTTTTGTATTTTTAGTAGAGACGGGGTTTCACCTTGTTAGCCAGGATGGTCTCGATCTCCTGACCTCATGATCCACCCGC
 >chr10:4572571-4572714 - E=2e-74
CTCGGCCTCCCAAAGTGCTGGGATTACAGGCGTGAGCCACCGCGCCCGGC|CATG|AAATTTTAAAGTCTAAATTATATTGATTAAGAA
 >chr1:100993819-100994221 - E=2e-230
ACAAGAAAACCAGGAGCTACCACCCTGTTTCTACGTCACTGAGGTCATCATTGATGGTGAAAAAAAATTACTTCTATTTGCTGTATCTC

AGAAATAGCCTGTCTTCTCCCTGCTTCACAGCAAATTGGCACTCTCAATTTCCAGAAAACCCTTTCTCAGCTATAGTCCTTGAAAATTT

TGAAATCCTTCTCTGGATACTGGGCACAACCTTCTGAGCCTCAGTGAAAGCAATGGCCAAATATGTGTTAGAAGCCTCTGCTGTGGAAT

TTCAGAGGTACAGTCATCACCCCATTTCTGCTGCTTATCAGACATCTCTTAGATATCCCTCAAACAGCATAAACCAAACTAAACTCCCT

GTGCTTGCA
