# Supplementary material for: Chromothripsis during telomere crisis is independent of NHEJ, and consistent with a replicative origin
Source: HighWire-hosted journal article supplement (doi:10.1101/gr.240705.118), 2019-03-14
Supplement: Supplemental_file_1.zip [file contig.2.DB116_length_547_mean_cov_16.9323583181.docx]

**DB116_length_547_mean_cov_16.9323583181**

ACTATTATTTATCAACTATTTATTGTCTTTCCACTAAATAAGAAGTGATCGTCATCTTTTCAGATGAGCACCACAGACTTTGCAAAAGA
 >chr12:9474543-9474801 - E=9e-127
TAATTGCCAATTAACCTTTGTGCCTGGATTTTCTCATTCCTAAAAATAGATAGTATTACATGACTCCAAAGTTTGTTGTGAAGTTAATT

GGGGTGGTGTATCCTAAAGTAACAAAAATGTTGACCACACAGGAGGGGGTGGTTAGTGTAAGACTCTCTGTTTTTCTGT|ACTACT|CA
 >
GCTACTCAGGAGGCGAGGCAGAAGAATTGCTCAAACCCCAGAGGTGGAGGTTGCAGTGAGCCAAGATTGTGCCACTGCACTCCAGCCTG
chr12:9473412-9473697 - E=4e-155
GGAAACAGAGCAAGACTCAGTTGAAAAAAAAAGAAACAGAAGAAATTAGCAATATATTTCATTTACTCCAATGTATCCAAATTATGGTC

ATTTTAGCATGTAATCAATATAGATTTTAATGAGATAGTCTATGTTCTTTTTTCCTAAGTCTGAAATTCGGTGTGTATTTACACTGACA

GCACATCTCAATTTA
