# Supplementary material for: Chromothripsis during telomere crisis is independent of NHEJ, and consistent with a replicative origin
Source: HighWire-hosted journal article supplement (doi:10.1101/gr.240705.118), 2019-03-14
Supplement: Supplemental_file_1.zip [file contig.2.DB116_length_564_mean_cov_8.51063829787.docx]

**DB116_length_564_mean_cov_8.51063829787**

AAATTCCCCATTGCCCTGACTTCCCTGGTTAAGAGTTCATAACATTGAGGTCTGAAATTTTGCTTCATTGCAGAATCAGAATATCTGCA
 >chr4:45157741-45157904 - E=2e-86
ATCTGCAATGTTTGTTTACCTTTATATAACCCAATCTTCTCTCTGTAGTAGATAAGAACTTCCTATAGAGAAAA|TCCATA|GCACACT
 >chr4:
GCTATGTTTCCCAGCCTCTTTTGCATTTGACAGGGAGGATGGGCTTGAGTTCCACCCAATAGAATATGAGAAAAAATGATAAGAATTAT
45155401-45155796 - E=4e-223
TTCCAGGTCTTTGCTTAAAAAATAATTTCCTGGCCAGGTGACTGAGCAAGACTCATCTCCAATAAATAAATAAATAAATAAAAATAATA

ATTTCCCATGTGATTTTCTGCACTTTTCCCTTTTTGGTTGGCTTGGTGAAAATGAACACAATAATCTACATCATGGTAGAACCACAAGA

TAAAAAGAAGCATCCCGGAACATGACTTAGAGGAAAACCACTTGCCATAAAGAATACTCAGTTTGGACTTTAGATGAGTAAAATATATA

TTTCTGTTTGTTCGCTTGCTTGTTTGTGACAT
