# Supplementary material for: Chromothripsis during telomere crisis is independent of NHEJ, and consistent with a replicative origin
Source: HighWire-hosted journal article supplement (doi:10.1101/gr.240705.118), 2019-03-14
Supplement: Supplemental_file_1.zip [file contig.2.DB116_length_566_mean_cov_9.55830388693.docx]

**DB116_length_566_mean_cov_9.55830388693**

TACTGGGTAAACTCCTATTCTCTCATTTCAAATTTTTTCTATTATCACACCATATGTAAATCTATTTTGCCCTCTTCAAGGTAGATTCT
 >chr11:80570826-80571068 + E=6e-134 p=3e-03
TCTCCACTTGTGTTTCTACGGTTCGATTCAATTATTGTCCTTATCATTTTTCAGCTATTATTTGTTTAAATGCTTGTACCTTGGAAGAT

GAAATCTGTCTCTAAATCCATCTTTGTATTCCTTGAAATGAATATATATATATATATATATA|TA|AAAAACAGCAAAAAATTAAATAA
 >chr11:80570127-80570453
GTAACATGTGGTCTCTAATGTGGTAAGTGATTTGATAATATTTAATACAATAAATGAAGGGATCATATTTCAACGTATTTGCCAATGAC
 - E=1e-181
ATTATCAAAATCAAGAAAAAAAAACTAAGCTAGGGATAAATACACATAAAACTCAGCATAGGGGATAAAGGTAGAAAGTATCAAGTGTT

TAATTTCAAAAAGAGATAAACCCCTGCTTTCGCATCAGGCTATAAGAAAAGTTTTGAGTATTATATTTGACCCAAAGCATAAACAGGAT

TAACTATGTTGATGCTAGTATTTGTTTTAAATTA
