# Supplementary material for: Chromothripsis during telomere crisis is independent of NHEJ, and consistent with a replicative origin
Source: HighWire-hosted journal article supplement (doi:10.1101/gr.240705.118), 2019-03-14
Supplement: Supplemental_file_1.zip [file contig.2.DB116_length_573_mean_cov_9.19371727749.docx]

**DB116_length_573_mean_cov_9.19371727749**

GAGGTCAGGAGATCGAGACCATCCTGGCTAACACGGTGAAACCCCGTCTCTACTAAAAATACAAAAAATTAGCCGGGCGCGGTGGCGGG
 >chr2:104759203-104759437 + E=4e-120 p=1e-02
CGCCTGTAGTCCCAGCTACTTGGGAGGCTGAGGCAGGAGAATGGCGTGAACCCGGGAAGCGGAGCTTGCAGTGAGCCGAGATCCCGCCA

CTGCACTCCAGCCTGGGCGACAGAGCGAGACTCCGTCTCAAAAAAAAAAAAA|AAAA|TTTCATGAACAATATCTTAGATATTTCTTAG
 >chr1:100994210-100994555 + E=6e-1
TTATGTTGTGATTTTGTCAATGCTGCTTAACTCTAATGCAGGATGATAATTGTGGCTAATTGCCTAAAAGCACATGAACTTTTTTTCCC
87
ATCAGTGTTATATGTGAGAGAACACACACACACACACACACACACCCCTCTTTAATATGAATTTGATGTCCTCACTTAAATTACATGAA

ATAATTCCTAAATGCTTGAAAATACAAAACCCTCCTCATCTAGTTCCTATCTCAATCAGACAAATATTTTAAAGCAGATTCAAAAAATA

GACTATACTAAACTTCTTACTGGAAAAAAAGTCACTTCTGG
