# Supplementary material for: Chromothripsis during telomere crisis is independent of NHEJ, and consistent with a replicative origin
Source: HighWire-hosted journal article supplement (doi:10.1101/gr.240705.118), 2019-03-14
Supplement: Supplemental_file_1.zip [file contig.2.DB116_length_580_mean_cov_7.91724137931.docx]

**DB116_length_580_mean_cov_7.91724137931**

AATTCTGTATGTGTGTGCGTATATAAGCGTTAACCTTAGAACTCGTCACTATACTATTACTTATTTTTAATTATACTTCTTTGCTCACA
 >chr3:21457078-21457273 + E=1e-102
AATCATTTTAGCCCTAATCTTTAAAAATTGCCTTTAGAGATGACCTGCCAGTCTGAAAATAACATGACCCCATTATCGGCTGTCTTAGT

TAACCAAACTCTAAGAT|GATGACGCATTTAAATTGTTGTTCCCTTCCACACCCCCACTGCCAGCTGTCTATTGCCTTTTTCAGGGTTG
 >chr3:21458356-21458741 + E=5e-214
GTTTTGTTCAGAATTTATTACATTCTTGACTGGGAAAATAGAAGTAGCATATCTTACATGATGTTGGCATAAGTGCGATCATAATAAGT

GAGTACTAAGTGAATTAGCAACTACTCCAATATTGGTGAAATGTACATTCTGGTTGAGCATATGAATGACCTACAATATGGCTTACACT

CAGGATGGAAAGGAATACAGAATTTTTTTCTGGACATATGCAAGTATGTGAGTAGCTGCATTGGTCACTCGAATAAAGAATTTTTATTC

CTGAGAGGATAAAAGCAATGCCCCTCTAGTGCTGATGTATTAAACCA
