# Supplementary material for: Chromothripsis during telomere crisis is independent of NHEJ, and consistent with a replicative origin
Source: HighWire-hosted journal article supplement (doi:10.1101/gr.240705.118), 2019-03-14
Supplement: Supplemental_file_1.zip [file contig.2.DB116_length_610_mean_cov_9.09672131148.docx]

**DB116_length_610_mean_cov_9.09672131148**

ATACAGAGTGTCTGGCCAATATGTGCTCAATAAATAGGTATTAAATTCAGTTGAATTAAAAGAAAATTGTATGTTCCTTATTTAATTCA
 >chr11:80571995-80572353 + E=9e-204
TTTTATTCAAGTATATCCCATTTTATAATTTTAAGGAACTTAATCGATTTAAAGAAGTAGATTAATCTGTCCAAGGTTGTCAAGTAATA

ACTGGAACAATCAGAATTAGAATGCACAAAGAACAAAGGAAAAGATATTTAAAGGGAGGTACTGTAACAACTACCAAGTCAGAAAGATT

CTTGAGAATGTAGATGATATAATGTATTTTTGTCCCTGTAAATAGTGAATAACAATAAATTAATAAACATTTGACAAATAATAAATCA|

TAC|AGGCACCCACCACCACACCCAGCTAAATTTTTTTGTATTTTTAGTAGAGATGGGGTTTCACCATGTTAGCCAGGCTGGTCTTGAA
>chr11:80589742-80590003 + E=2e-131
TTCCTGACCTCAGGTGATCTGCCTGCCTTGGCCTCCCAAACTGCTACAGGCGTGAGCCACCGTGCCCAGACAAAAGCCTTTCATCTAGC

TATTTTCTAATATATAATACCTTATTGTTAACCACCTTTGCAAAGGTTATACTGTCATATTTCCTCTTCTAGCCCTTT
