# Supplementary material for: Chromothripsis during telomere crisis is independent of NHEJ, and consistent with a replicative origin
Source: HighWire-hosted journal article supplement (doi:10.1101/gr.240705.118), 2019-03-14
Supplement: Supplemental_file_1.zip [file contig.2.DB116_length_621_mean_cov_7.48792270531.docx]

**DB116_length_621_mean_cov_7.48792270531**

AAAAAATGAAAAAAGTGTTTTCTCTAAGGAAATCCATTTTACAAGTGAAAATTTCTTTGTCCAAGTTCTCTCTATCAGGAGTAATTTAA
 >chr5:123511122-123511306 + E=5e-99 p=0e+00
TTTTCTTCATAATTTAGGCAGAAATAAGTAAGTTTTTCTTGGATTCAAACATCAGCAAGCAATACAAAGACATTATTAGTATGTTTTGT

AATCTT|ATTTTATTATTATTTTAATATAATATTA|TTATTTTAATATAATAATATGTGTTCATTTAAATAAGACCAAATTTCTTCAGG
 >chr5:123512980-123513389 + E=2e-234
ATCCTTCAGGAAAGAATAAAGTAAGTATGTCTCCTCTTTGAATATTCCCAAATTATTAATAATAAATTATTTCCTGATGCCAGTTTTAG

TCTTTAGATTCTAAGATTTTACATTAGATGAAATATAAATACTAATTGGAATATTATTGATCTTTTTCAACTTCCTCCTCATAGTAGCT

TCAATAAGCATATTATTATACTAGATAACTTGAAAAAGCATCTCATTTTCTTTGACATTTTTTCTGTTACTTATATCTAGATCACAAAA

TCACACAAGTCTTGGCAAAGAAAGTTTTGAAACTTTGTGGAAGTTTTTGGCATTATCTATGTCATACTTGAAAATCATTTGTTTTAGTC
