# Supplementary material for: Chromothripsis during telomere crisis is independent of NHEJ, and consistent with a replicative origin
Source: HighWire-hosted journal article supplement (doi:10.1101/gr.240705.118), 2019-03-14
Supplement: Supplemental_file_1.zip [file contig.2.DB116_length_622_mean_cov_5.78778135048.docx]

**DB116_length_622_mean_cov_5.78778135048**

TTTTAGATATAGTAACATTATTGAATATTTGAATGCTTTGCAGTGATGAAATTCTCTCCTATTACTTGAGGCATAGCTAAATACCTGCC
 >chr2:78223360-78223704 + E=3e-195
ATTATGTATACAAATGCATTGACGTCACCCTGTCCTTTCTATCTGTTCTACCTTCAACTTGTCCATTGGATTCACTGCCTAGAGAACAA

CTCAGAGAAACCATACTTCTGCTACTAGCTGCTATGAAAATACCTCTGACATGGAAAGGGTGCAGTTTCTGAATGCCCATATTGCTTCC

AACATTCATGATGCCAGAGCATTGCTGCGTTATAGACATACATGGTAATAACTGCTCCTCCCAAAATCTATA|TGAAA|TGTCAAAATA
 >chr2:78224465
TTCATATATGTAGAAAATCCAGAATAATTTATAGGCAAACTACTAAAATCAATAGGAAATTATCATTGCTGGGTTCAAGTTTAATATTT
-78224748 + E=1e-158
AGAAAAAATAATTGTAGGCTAGGTGCAGTGGATCACACCTATAATTTCAGCACTTTGGCAGGCCAAAGGTCGGTGGATTGCTTGAGCCC

AGGAGTTCGAGACCAGCCTAGGCAACATATTAGGTTAGTGCAAAAGTAATTGTGGTCTTTGCTATTACTTTAATGGCAAAAAACGCAAC

T
