# Supplementary material for: Chromothripsis during telomere crisis is independent of NHEJ, and consistent with a replicative origin
Source: HighWire-hosted journal article supplement (doi:10.1101/gr.240705.118), 2019-03-14
Supplement: Supplemental_file_1.zip [file contig.2.DB116_length_666_mean_cov_7.87987987988.docx]

**DB116_length_666_mean_cov_7.87987987988**

CTTTGCTCTGATACAATGTGAGAGAGATCCCTTGTTACTCTTCTTATGTGGTACTAATTTGCCTTTCTCTCCCTATGACCAGTTCTATC
 >chr13:61742959-61743307 + E=1e-185
TATTAATTTTCTTGAGACCCAGGACTTCTGGGGCATAGGAGAGCTGGGATGAGGCTGTGCTCAAGTCTCTGATCTCTCTTCTAAGACCT

GATTACATTTCTGATAGCAGAACCCACTTTATCCAGACAGCAGAATAAGCCCAATTGGGAAGGGTGCTTAATCTTTAGTCCTCTGACTT

ATCTGTAAGACATTTTCCCTCAACAGACCTGACCTATTTTTCTACTACCTTTGAAAATAAGATCAGCTGAAATGAATGT|TA|TATATA
 >chr13:
TATATAACAATAAAAAATAATACAGCAGCTAAAACTAATACAAATAAAATACAGTGTAAAACTATTACATAGAATTCACATTGTATTAG
61752306-61752626 + E=9e-178
GTATTATAAGTAATCTAGAGATGATTTAAGGCTTACAGAAAGAAGTGCAGAGGTTGTATGTAAACACCATGCCATTTTATATAAGAAAA

TTGAGCATCTGTCAATTTTGGTATCCGTGAGGGTCCTGGAAGCAATCCCCTACCGATACAGAGGGACCAGTGTAATGGGTAGAGACCAG

GCTGGCTGCTAAATATTCTAGAATGCACAAGACAAAGAATTATCT
