# Supplementary material for: Chromothripsis during telomere crisis is independent of NHEJ, and consistent with a replicative origin
Source: HighWire-hosted journal article supplement (doi:10.1101/gr.240705.118), 2019-03-14
Supplement: Supplemental_file_1.zip [file contig.2.DB116_length_687_mean_cov_11.3508005822.docx]

**DB116_length_687_mean_cov_11.3508005822**

ACCTTCTTATTTTAAGCTACATGGGAATTTTTTCATTTTCTTTCTTTCTTTTTTTTTTGAGACGGAGTCTTGCTCTCTCACCCAGGCTG
 >chr2:209855761-209856109 + E=1e-197 p=1e-02
GACTGCAGTGGCGTGATCTCGGCCCACTGCAAGCTCCTCCTCCTGGGTTCACGCCATTCTGCTGCTCAGCCTCCCCAGCAGCTTGAACT

ACAGGCGCACGCCGCCACGCCCGGCTAATTTTTTTGTATTTTTAGTAGAGACGGGGTTTCACCGTGTTAGCCAGGATGGTCTCGATCTC

CTGACCTCATGATCCGCCCACCTCGGCCTCCCAAAGTGCCGAGATTACAGGCGTGAGCCACCACGCCCGGCTGATTTTT|TC|TACTTA
 >chr2:2
CCATGAGCCCTCTATGAGGTCCAAGCTATTTCCAAGATGCACAAGGCATATCTGGCTCCAGGACGATTAAGGAAATAGAAATGCTGACA
09857107-209857448 + E=2e-190
AATAATCTAAGTAATCATTGAGTCAAAGAAGAAATCTGAAGATAAATCAGAAAATATTTTAAACTAAATGATAATGAAAATATGGCAGA

TCAATAATCATAGGAGTAGCTAAAGCAGTGCTTAGAAGAAAATTTATAGCGCTAAATGCCTATATTAGAACAGATAGTAACCTAACAGC

GATCTGTGGCTGCAATGTAAGAAAATAAAAGAGCAAAATAAACTCAAAGCAAACAGAAGAACAAAA
