# Supplementary material for: Chromothripsis during telomere crisis is independent of NHEJ, and consistent with a replicative origin
Source: HighWire-hosted journal article supplement (doi:10.1101/gr.240705.118), 2019-03-14
Supplement: Supplemental_file_1.zip [file contig.2.DB116_length_694_mean_cov_10.4827089337.docx]

**DB116_length_694_mean_cov_10.4827089337**

CTTCCACTCCACTGGCAGGGCCATCTGCCAGGTCCACCCAGCCATAACCCAACCCAAGCCCATGCATGCTGACCAAGCCGTCCTTGTCT
 >chr8:37698417-37698748 + E=2e-187
CCGTACTCACCATATCCTGTCTCCCCAACCACCCCGGCCCCCAGCCCCACCCCAGCCATGCCCCCTGTCCTCATCACTGCTTCTGTGTC

TCCTACAGCTGCTGGCTGGTGTGGCGTCCAAGCCTTGGCGCCTTCTACATCCCTGTGGCTTTGATTCTGCTCATCACCTGGATCTATTT

CCTGTGCGCCGGGCTACGCTTACGGGGTCCTCTGGCACAGAACCCCAAGGCGGGCAACAGC|AGG|AGTGAGCACTCATTTGGAGAACT
 >chr8:37720992-37721358 -
GAGTCCTCCCATGATGGCACTGCTTAAAATCCAAACCCAGAGTCAAGTCCAGAGGTCCTCGACCTGTGAGGCAAGTATGGTTTTTACAT
 E=2e-208
TTTTAAAAGTTCATACAACAAAATAAAACAAAACAAACAGACCAAAAAACCAAGGAAGAACATGTTAACAAAGGCTGTCTGTGGCCCGC

AAAGGCTCAAATATGTGCTATCTGGCCCTTTCCAGAAGACTTCATCAGTCAACAACCTGTTTTCACTGTAAATTGAAAACGGATTCCCT

GGCTGGGCACGGTGGCTCATGCCTGTAATCCCAGCACTTTGGGAGGCTGAGGCAGGCGGATCACCTGGGGTCA
