# Supplementary material for: Chromothripsis during telomere crisis is independent of NHEJ, and consistent with a replicative origin
Source: HighWire-hosted journal article supplement (doi:10.1101/gr.240705.118), 2019-03-14
Supplement: Supplemental_file_1.zip [file contig.2.DB116_length_697_mean_cov_5.38020086083.docx]

**DB116_length_697_mean_cov_5.38020086083**

TTACTGGCATTCCAGGAACCACTGGGGTATGAAAAAAAACTCTTGCAGCTAGCTTGGTGTCTGCCCAAACAGCCGCCCAGTTTTGTGCT
 >chr2:172618062-172618416 + E=2e-196
TGAAACCCAGGGCCCTGGTGGTGTAGGCACCGGAAGGAATCTCCTGGTCTGCAGGTTGTGAAGACCGTGGGAAAAGTGCAGTACCTGGG

CCGGAGTGCACTGTTCCTCACAGTACAGTCCCTAATGGCTTTCCTTGGCTAGGAGAGGGAGTTCCCTGACCCCTTGTGCTTCCTGGGTA

AGCAACGCCCCACCCTGCTTCGGCTCGCCCTTGTGGGCTGCACCCACTGTCCAACCAGTCCCAGTGAGATGAACCAGGTACCT|CAG|C
 >ch
CTTGCAAATAGCTGCCCCTTGGACACCTTTTCAACCAGGGTAGGTTTGGGCAAAAGATAGATAGGCCTTGTGAAAGCCCTGGAAGCTGA
r2:172618995-172619342 + E=5e-197
GCAGTTTAGGCAGGAAAATCAGGGTTTCAGGTACCTTGAACGTGGTCGAGAAGAGAATGAAGTGAGTTCCAGGTAGGCATAACCCACTG

GCCCAGCAGACTTTTTGCCCCCTGGGAAAGAACACAACTACAGGAGGGCCTCTAAAATGAGGCACCCGAGGGCAGTGCTGGGCCTGTCT

TTTCTCCTAAAGTCAACTGGGTCACTTTTTAAAAGATAATTCTGTTGTCCCTAATATGTTATTTTTTCAATGCAAA
