# Supplementary material for: Chromothripsis during telomere crisis is independent of NHEJ, and consistent with a replicative origin
Source: HighWire-hosted journal article supplement (doi:10.1101/gr.240705.118), 2019-03-14
Supplement: Supplemental_file_1.zip [file contig.2.DB116_length_702_mean_cov_17.3988603989.docx]

**DB116_length_702_mean_cov_17.3988603989**

AGACACAGATACTCATAATGTTCAGAATCAGAAAAGGCCTCTACAATATAGAATATAGTTCCAGGAATAAGTTCATTTCTCCATGGTTA
 >chr11:38096388-38096753 + E=8e-208 p=2e-02
TCTCTTTCTGAAATCTTTGTCTGTCTAACCTATTACTTCAGCAGCTTTCTGATGATTTTATACAGATTTTCACTATTTGTTTCTATATA

GCTTTTCGAGATTAAGGAGAGAGTATTTGTGTATTTTAAGTTTCTCCAGCAAAAAGCCAAGCTTTGTATTTGTCATTGACTTTTGATCA

ATACTTTCAGCATATTTCCAACAAAGAGTCTATATGCATAGCCCACCAGGATTTCATGAAAGTACCTATTTTCCATCAATGTAATCAGC

ATTG|GATAT|GATGAATATTTCATGGGTATTGCATGAATCGTGAACAAAAGCAATGTCAATAGAGACAAAAAATATTTTTGTTTCTAT
 >chr11:38097301-38097643 + E=6e-191
TTCAGTTTCTGGTTTAGAGAACTGAATTTATGCAAGGAAAATTTTCTGCTCCTATATAATGGAATCAATTGAAATCCATGTATGTAATT

GCAAAGACGTATAAGATCAAAAGATGTCATAAATGATAGATTTTCTTACATTAGTTTAATGCACCATGCTCTCATGAAATAAAGTTAAC

CAAGATAAAGATTTCACCAATTCTTGTCTTTTAAAAAATATTTCATAGTCATTTATAATCTTGGACCTGGAATCTGGAATT
