# Supplementary material for: Chromothripsis during telomere crisis is independent of NHEJ, and consistent with a replicative origin
Source: HighWire-hosted journal article supplement (doi:10.1101/gr.240705.118), 2019-03-14
Supplement: Supplemental_file_1.zip [file contig.2.DB116_length_758_mean_cov_22.1372031662.docx]

**DB116_length_758_mean_cov_22.1372031662**

CTTTTTACAAATCTCTTAACTTCCTTAAACGTTGTGCTTGTTTGCGGTTCTCCCAATGATGATCACATCATTTCCTGAACATTCCCAGG
 >chr10:20648662-20649012 + E=7e-185
GTGAACTCAATGCAGATTCTTCAGATTTTAGGGAAAACGTGGATTGGTAGAAAAAAAACAAAAATGACCATGGTTTTCAAAATTTTTTT

TCTATATTCTTCCCCATTGACATACTGTACAGTTTAAAAGTGTCCTATTATACTATATACTGAGATATTAAGCATAAAATCTTTCCTTA

GATATGTTCCTATGACATTTCATCCATTTCCAATAAAACATGTGGGTAAGTAAGATGTAGTGGATGTCAAAACTAATAGGTT|ATT|AC
 >
ATTCGTAATAATCTCCTTTTGAATCTTGATGTTTTCTGTAACCCTGGTAGCTAAGTGCTGATAACAACAATTATCTAAATGTTGCAAAA
chr10:21386903-21387309 + E=2e-229
GGATGAAATCAGTAACAATGGGTCTACTGAAAAGAGGCAAAAATGTGAGTGGATATGAATTTATAACAGCAATAGGGCTAAAGCTGCAG

GGCCCTTTCATGTAGGAGGATAGCAACACACACACACACTCATTCACATACACACACATTCTCACTCACACGTGCACACATACGTACAC

ACACTTGTACACATTCACACACACTGTCACACAGAGAGTGCAGAAATGAAAGGAGACATTATCACGCATCCACACAAAAGACAAAGATC

AAACTATGACTCTTTCCTCTTTGCAGCCCTACAACTCTTCCTATCACA
