# Supplementary material for: Chromothripsis during telomere crisis is independent of NHEJ, and consistent with a replicative origin
Source: HighWire-hosted journal article supplement (doi:10.1101/gr.240705.118), 2019-03-14
Supplement: Supplemental_file_1.zip [file contig.3.DB37_length_401_mean_cov_5.99002493766.docx]

**DB37_length_401_mean_cov_5.99002493766**

GGGGGGGGGGGGGGGGGTGGGGGGGGGGGGGGGGGGGGGGGGGGGGGGGGGGGGGGGGGGGCTGGGGCG|CGGGGTGGGGTG|GGGCGC
 >chr2:33141586-33141655 + E=5e-21 p=0e+00 >chr1
AGTGGGGAGGTTGGGCGCAGGGCGGGGTTGGGCGCTGGCGGGGTGCTTGAGCGCTGAGGCTTTAGCTCCATGGGAGCAGGAGGTAATGG
0:1671492-1671703 - E=1e-115
GGGAAGTGAATTAGAATGTCACTGTGAAGTCCTGACCATCACGATGAGGAGGTCTCCACCAATCCCAGGGGACAGCATGGCTAGGAGTA

AACCCACACTTGTCTCAGAAACTGATT|AG|AATGTTTAGAATATATCTTTAAGCTTCATATCTAAAGGAGAGACCTATGTCTATTTAA
 >chr10:17627730-17627837 + E=7e-53
ATATTTTGTAAATTTAGACTAAAACTATAAACAAATTGAATTTTAAGTT
