# Supplementary material for: Chromothripsis during telomere crisis is independent of NHEJ, and consistent with a replicative origin
Source: HighWire-hosted journal article supplement (doi:10.1101/gr.240705.118), 2019-03-14
Supplement: Supplemental_file_1.zip [file contig.3.DB37_length_579_mean_cov_4.6597582038.docx]

**DB37_length_579_mean_cov_4.6597582038**

CCTTGCGATAGTATTGCTGCTATAAAGACACATGCACATGTATGTTTATTGTGGAATTATTCACAATAGCAAAGACTTGGAACCAACCC
 >chr9:22531826-22531990 + E=6e-84 p=0e+00
AAATGTCCAACAAT|GATAGACTGGATTAA**GAAAATGTGG**CACATATACACCATGGAATACTATGCAGCCATAAAA|TAGAATGAGATC
 >chr16:72356105-72356393 - E=1e-146 p=3e-02
ATGGTCTTTGCAGCAACGTGTATAGAGCTAGAGGCCAGTATCCTAAGTGAACTAATGCAGGAACAGAAAACCAAATACTGCATGTTCTC

ACTTGTAAGTGGAAGCTAAACATTGAGTTCACATGGACACAGAGTAGGGAACAACAGACACTGGGATGTACTTGAGAGAGTGGGAGGAG

GATGAGGATTAAAAAACCATCTGCCACATACTATG|CT|AATACAGTGAATTGGTACCAAGGTAGTGAGGCACTGCTGTAAAGATACCT
 >chr16:72354579-72354769 - E=1e-102
GAAAATGTGGAGTGACCTTGGGACTGGGTAATAGGCAGAGGTTGGAACAGTTTGGAGGGCTCTGAAGAAGACAGGAAAATGTGGGAAAG

TTTGGAGTTTCCTAGAGACTTGGAGGGCTCAGAAGACAGAAAGATTTGG
