# Supplementary material for: Chromothripsis during telomere crisis is independent of NHEJ, and consistent with a replicative origin
Source: HighWire-hosted journal article supplement (doi:10.1101/gr.240705.118), 2019-03-14
Supplement: Supplemental_file_1.zip [file contig.3.DB37_length_663_mean_cov_7.89592760181.docx]

**DB37_length_663_mean_cov_7.89592760181**

TTATACTCTTTTAGTTATTTTTTAATGTACACAAATTATT|TTACCA|CAGTCACCCTGTTGTGCTAGCAAATACTAGGTCTTATTCAT
 >chr4:115271760-115271800 + E=3e-03 p=4e-03 >chr14:32647701-32647951 + E=1e-138 p=5e
TCTTTCTAATTATTTTTTGTACGCATTAACCCCACTTCTTATTCACCCTTCCCACCATTACCCTTCTCAGTCTTTGGTAACCATCCTTC
-02
TATACTCTATCTCCATGAGTTCAATTGTTTTAAATGTTAGCTCCCCCAAAGAGTGAAAACATGTAGTTTGTCTTTCTGTGCAAGTATTA

TTTCACTTAACATGATGACCTCTGGTTCC|AT|TGCAAATACTAAATGCAATCTTGTATGTAAAATACCTGTCAAGTATTTGTTGATTA
 >chr14:32666359-32666728 + E=3e-210
ATAAATATTACACTCTTCCACCACATTTTCTAACTCTTGAGTTATTACCTCTAGGAAAGAATAAATATAATGATACACAAATTCCAGGA

ACTGAAGTTTTCCGTATCAGCCTATACAGTGTTCCTCAGACTAGGATCTAGAACCTCTTGGAGTCTTCAGACAGATTCTTAAGGGTTAG

AGGATTCTCTAGAGGATTTTTAGAAATAGTTTTTTATTGGGATGATCATCTTAAAATATTAAAATAGGCAGGGTCTAAAACATCTGAAT

ATTCACCTTATAACTAAATATTGTCATGAGATTTCAACATGAAT
