# Supplementary material for: Chromothripsis during telomere crisis is independent of NHEJ, and consistent with a replicative origin
Source: HighWire-hosted journal article supplement (doi:10.1101/gr.240705.118), 2019-03-14
Supplement: Supplemental_file_1.zip [file contig.3.DB38_length_516_mean_cov_8.7015503876.docx]

**DB38_length_516_mean_cov_8.7015503876**

TGTAAGCACATGAAAAGATGTTTAACATTAATGGAATGTTTGATTTGCCTCAGAGAACTACAAGTCAAAACTACAATGAGACTCTACTT
 >chr4:185959716-185959968 - E=3e-135 p=2e-02
CACACCCATTAGAATAGCTGTTATTTAAAAAAAAAAAAGCAGAAAATAACAAGTGTTGGTGAGGATATGGAGAAACTGGAACCCTCTGC

ATTGATGGTGGGAATATAAAATGGCACAGCCATTGCGGAAAACAGTATGGGGGTTCCTCAAAAAATTAAACA|T|TATTTCATTTAGCA
 >chr4:18595944
TAATTTCTTTAAGATCATCCAGGTTGTAGTATCACAATTTCCTTCCTTTTCAAGGCTGAATAATATTCCATTGTATTTATATACCACAT
3-185959589 + E=3e-76
TTTATTTATCCATTTATCCATTAATGGACACTTAGGAGGTTT|AAA|CAAGGTAGCAGGTGCAGAGGCAGCAATGTGGGAAGCAGAAAG
 >chr4:185958056-185958173 - E=9e-59
CCACGAGGGTAGGGAGGAGGGCAAGAGTGGAGCACAGTCCTGTCGCTGTGGGGAGGAGCTTGGGTTTAACCTGCA
