# Supplementary material for: Chromothripsis during telomere crisis is independent of NHEJ, and consistent with a replicative origin
Source: HighWire-hosted journal article supplement (doi:10.1101/gr.240705.118), 2019-03-14
Supplement: Supplemental_file_1.zip [file contig.3.DB38_length_640_mean_cov_10.353125.docx]

**DB38_length_640_mean_cov_10.353125**

ATCTAATTAAAAGGGAAAACTCTCTATTTCAGGTTTATATGTATCAATTGCTTGATTAGAAAATAAATTATTTAACCCATATAATCTGG
 >chr1:142964758-142965172 + E=2e-222
CGTCAAAAAACTTATAATAAAATTACTTTGATTTTATTGCTTATAAGTTTGTGAATTTAAATCTCAACTGACAGTGATGAATTTATTTG

CTTTGTGCTGACAAGACAGTATGTTGAAGTTTTGTTTTCCAACTCAGTTCTAAATCTGCAGTGTATCAAAATCTCCTCATTATGCTTTG

GATGTTATGGTACATAAATGGTATCTTCACAAAGATATATTCATTCTGGTACTGAAAGTGCATACTTAAAATTCTTCATGAACAGTTTT

ATTGAAAAAATATGTAGACAAGCCATTAATTATACACAGTGATCTGGAACAAATTCTT|TTTTTTTT|TATAGCTAAAGGATTTATTTA
 >chr2:11929914-11930
TTCACTGAAGAAGAAATCCACATGGGCTCTGAAACTTAAAAGACATTAGTCCTTGTGATATGCATGCTAAATCTTTCTACAAG|ATTTA
018 + E=8e-51
T|ATTATAGCCACCAGAATATAGTCACAATCACTACCCAATTTTGATAACTGAAGATCATTTTTTGATTAATTGCATTGTTCAGGCTAT
 >chr4:162053142-162053250 - E=3e-53
CTTATCTTTTAGAAATATTTC
