# Supplementary material for: Chromothripsis during telomere crisis is independent of NHEJ, and consistent with a replicative origin
Source: HighWire-hosted journal article supplement (doi:10.1101/gr.240705.118), 2019-03-14
Supplement: Supplemental_file_1.zip [file contig.3.DB39_length_341_mean_cov_44.4662756598.docx]

**DB39_length_341_mean_cov_44.4662756598**

A|AAGAAAAAAAACAAGAAAGAAAGCAAGAAAGCAAGAAAGCAAGCAAGAAAGAAACGAAAGAAAGAAAGAAAGCAAGAAA|ACG|GGA
 >chr7:116223550-116223628 + E=3e-13 p=0e+00 >c
AAGCAAGAAAGCACGAAAGCAAGCAAGC|GAGC|GAGAGAGAGAGAGAGAGAGAGAGAGGCGGGGCGCGGTGGCTCACGCGTGTCATCC
hr1:112713402-112713433 + E=3e-04 >chrUn_gl000220:102216-102439 - E=6e-117
CAGCACTTTGGGAGGCTAAGGCAGGCGGACCACCTGAGGTTGGGAGTGGGAGACCAGCCTGACCAACATGGAAAAACACCGTCTCTACT

AAAAGTACAAACATCAGCCAGGCACGGTGGCCCATGCCTGTAATCCCAGCTAATCAGGAGGCTGAGGCAGGAGAATCGC
