# Supplementary material for: Chromothripsis during telomere crisis is independent of NHEJ, and consistent with a replicative origin
Source: HighWire-hosted journal article supplement (doi:10.1101/gr.240705.118), 2019-03-14
Supplement: Supplemental_file_1.zip [file contig.3.DB39_length_546_mean_cov_7.79304029304.docx]

**DB39_length_546_mean_cov_7.79304029304**

CAAACC|CACAAATAAAAAAAAAAAAAAAAAAAAAAAAAAAGAAAAAAAAAAAAAAAAAA|TAAAAAAAAAAAAAAACAAAAAAAATTA
 >chr5:156284108-156284161 - E=3e-14 p=0e+00 >chr12:126975637-126975675
AAAAGAAGAG|G|TTTTTTTTTTTTTTTTTTTTTGAGACAGAGTCTCACTCTGTTGCCCAGGCTGGAGTACAATGGCACAATCTCGGCT
 + E=3e-05 >chr3:186480690-186481120 + E=1e-190
CACTGCAACCTCTGCCTCCCGGGTTCAAGCAATTATCTTGCTCAGCTTCTTGAGTAGCTGGAATTATAGGCACATGCCACCACGCCTGG

CTAATTTTTGTATTTTTAGTAGAGAGGGTTTTTCACCACGTTGGTCAGGCTGGTCTTGAACTCCTGACCTGGTGATCTGCCAGCCTCGG

CCTCCCAAAGTGCTGGAATTACAGATGTGAGCCACCATGCCCAGCCACATTTCTGTTTTGTTCAGCCATGAGATTTAATTTATTTTTGT

GATAGGAGGAACATTTATTTTTCTTTTTTTTTTTTTTCAGAAAGAGTTTCAATCTTGACATCCAGTCTGTAGTGCAACGGCAT|AAACT

AAGCTCACTGGACCCTC
