# Supplementary material for: Chromothripsis during telomere crisis is independent of NHEJ, and consistent with a replicative origin
Source: HighWire-hosted journal article supplement (doi:10.1101/gr.240705.118), 2019-03-14
Supplement: Supplemental_file_1.zip [file contig.3.DB41_length_557_mean_cov_14.5619389587.docx]

**DB41_length_557_mean_cov_14.5619389587**

TTTTCAACCCAGAATATCATATCCTGCCAAACTAGCTTCATAAGGGAAGGAGTAATAAAATCCTTTACAGACAAGAAAATGCGGAGAGA
 >chr5:119325811-119326139 - E=1e-167
TTTTGTCACCACCAGGCCTGCCTTACAAGGTCTCCTGAAGGACGTACTAAACATGGAAAGGAACAACTGGTACCAGCCACTGCAAAAAC

ATGCCAAATTGTAAAGACCATCAATGCTATGAAGAAACTGCATCAATTAACAGGTGAAATAACCAGCTAGCATCATAATAACAAGATCA

AATTCACACATAACAATATTAACCTTAAATGTAAACGGGCTAAATGCCCCAATTAAAAGAC|TTAGACTGGCAAACTGGATCTTTATCA

AC|TCAAGACCCATTAGTGTGCTGTATTCAGGAGACCCATCTCATGTGCAAAGACACACATAGGCTCAAAATAAAGGGATGGAGGAAGA
 >chr5:120984206-120984352 - E=4e-61 p=0e+00
TTTACCAAGCAAATGGAAAGCAAAAAAAAAAAAAAAAAAAAAAAAAAAAAAAAAAAAAAA|GGGAAGCAATAATAAAATAAG|AAAAAA
 >chr3
AAAACACCAAAATAAAAAAAAAAAAA|A:101310588-101310620 - E=1e
