# Supplementary material for: Chromothripsis during telomere crisis is independent of NHEJ, and consistent with a replicative origin
Source: HighWire-hosted journal article supplement (doi:10.1101/gr.240705.118), 2019-03-14
Supplement: Supplemental_file_1.zip [file contig.3.DB45_length_944_mean_cov_7.62711864407.docx]

**DB45_length_944_mean_cov_7.62711864407**

GATTGTTTTAAGGATTACATAAGGTATGCTATGCAGGTTAAGTATTTGTCTCACAGTAGTCTTGCATTATTATTGTAAAAGTTAGAAAA
 >chr4:44208857-44209133 + E=4e-154
TAAAAAAATAACCATTCAAAATGAACATTTACTATTTGTTGGGTCCTTTTAAGAGCTGACTTTACAAGTTGTGAGATAGTATATTTGTG

GCCAAGTATCAGATAAGCAACCTAATACTTGGAGATGTCAAACGTCTTTGTTCTAACACTTGTGCTGTGACTTTCCAGCTGTGTAACCT

TGAACAAGT|G|TTCGTTAAACACATTGCAATTACTGTATTACAACAATGGAAAAGAATAGTAGATAATTGCTGGGGAATTTGAGAAAA
 >chr4:44209898-44210253 - E=1e-201
TTTCTAAGAAAGTTAATTTGAACCCCTTCTTAAAGGCTGTGGTCACCTTTTGTACCCAAAGAGGAAAACTGTGGTGGACATAGGGTTTC

TTAGCCTATCACAATCTCCTGGAATTTCTTCAGCACTTCTCTCTTGAGCTCCAGAAGTTCTGATGTCACCAAATAGGTCAAGTGGGATC

ATTTCAGCTAGGTCTTTGCATCTTTGATTCTCATCCCTGCTTACTCTGCCTGTGTTTATATTGCTAGCAACTCAGCAGCAAGCCATTCC

CCATGCTT|GTA|ATTACCTGAGAGTACAGCCACAGGGATCTTCAGAGAATGGCAGCACCCTCAGACTGCATCCTAATGAGTAGCCTTT
 >chr4:44210369-44210684 + E=2e-177
TAATCTTCACCTCCATCTCTTATCACTACTTCCGTAACACGAAGCATTTCCTAATTAGGATCATCATATCAGGTGACAAGATAGAATAC

AAATTATATTGAAAATCACAAAATAATACCAAATAAGAAGTTTGGTATGCTCCAATAGTACAATGTATGCAAACTTTTCACCCTAAAAG

AAAATGATCTTCTTGTCCAGGAGTTGGAATAATTGGGCTACAGAGACTGAAGTCCTAT
