# Supplementary material for: Chromothripsis during telomere crisis is independent of NHEJ, and consistent with a replicative origin
Source: HighWire-hosted journal article supplement (doi:10.1101/gr.240705.118), 2019-03-14
Supplement: Supplemental_file_1.zip [file contig.3.DB45_length_1172_mean_cov_41.2482935154.docx]

**DB45_length_1172_mean_cov_41.2482935154**

AAGAAGAGAATGCGCATTTGGCTCTTCTTTAACACCAAGTCCACAAAAAAAATATTGGGTTTCCCC|TTTTTTTTTTTTTTTTTTTTCC
 >chr8:116421134-11642
CAACATATGAACTGCAGCATATCACTTTTTCTTTTTGTGCCTCAGGTTCCTCAGCTGTAAAATTGAAAAATATATGTATTAATAATATT
1509 - E=2e-204
ATTAATAATAATAATGGTAATGTAATACTTGTTTGTAAAGCACTTTGAGATCCTTGGTTGAAAGGCACCATAGGAGTGCCAAGTATTAT

TATGTGGCCAAGGGGGTTATTTAAACTGTCAGTTCCCAAAGGCCAGGAAAGGTTGGGGTCATTTTTCTTAAAGACGAGCTGTAAATATC

AACTAGGCAGCCAATAGTGTTGACTATGAAGATGCAAAACTATTACTAGGCTGATAAAATCATAGTTTCTTAATGGCTACCAATAA|AC

ACAATTTTTATTGTTAATCTTTCTGA|AGAAACTAGTATATATCTTTTTACACAAAATCTATCAGTAAGAGATTGATTGGTTAAAGAAA
 >chr8:116420432-116420625 + E=6e-65 p=4e-02
AAAAGCAAAGCAAAACAAGTTGAGAGAATTCAGGCTTTATCAATATAAGTAATAATTTTTTAGAATGGTGATTTGATTTCACCATTTCA

ATTCAGCAGAGCCTGTATATATATATATATATGTATATA|TAT|GTTACGATGTGTAAAAACTCCTGCTTATGAAGTTTAACTTTGAAT
 >chr8:116419863-116420348 - E=6e-243
TCGGTATACTCATGTGAACATGATGCAATTCCTAATCAATCATCTCAAAAAGTTTAAATTAATATATCAAATATCTTATTTGTTTGGTT

AAAATCAAATTAATCAGGGCAAGTTCCCTGAAAGATGACTTTGAAAGAGAAATGAGGCAGAACAGATCCAGATAGGAAAGGACGTTGGC

AAGACTCACCTGCATGTTTTTAACCAGAAGGAAAAATACAAAAAGACAGAACATAAAGTATATAAATAATTGATTGCTTCAGAAGATTT

GCTTGGAGAGTTTAAAATAATTAGTATCTCCCCTCATTATACAATCTTCATTTCTCATTTTTGGGAGCCCAAATTAAGGAACAAATCCT

TCTAATTATTTTTTTTTTTTTTTTTTTTTTTTTTTTTTTTTTTTTTTTGAAATTAGCAGAGAGTCTTTGAGGGGCTTTCAT|TTTGGTT

ATGCCCTTTCTTTTCATCTGG
