# Supplementary material for: Chromothripsis during telomere crisis is independent of NHEJ, and consistent with a replicative origin
Source: HighWire-hosted journal article supplement (doi:10.1101/gr.240705.118), 2019-03-14
Supplement: Supplemental_file_1.zip [file contig.3.DB46_length_844_mean_cov_4.95497630332.docx]

**DB46_length_844_mean_cov_4.95497630332**

CATATGAAATGTGGAGAGGCCCGTGTGGCAGAAGGAAAAGCAATGTGGAAGGTTTTAGGAACTTAGAGCCTCGATTCTACAGCTATAGG
 >chr20:10952076-10952315 - E=7e-132 p=4e-02
AAACTGAATTATGCCAACAACCAGAGTGAATTTGAAGCAGACCCCTCCCCAGTTGAAACTCCAGATAAAAGCACAGCCTAGCCAGTACT

GACTGGAGCCTGGTAAGACCCAGAAGCATAAAACCCAGCTAACTGTTACCTAGATTCCT|AA|ATGGTCATACCATTTACATGCCAAGC
 >chr20:10950615-10950909 +
AGCCGTAAATCAGATTTTCAGTTTCCTCCACATTCTTGTCGAAACTTAATATTGACTATGGTTTTATTGTAGCCATTTTGGTGGGTAAG
E=6e-165
GCAAACCAAAAATACCATTAAAATCAGCACAGAAGTCCCCTTGCCCCAGTACTGATGTTTCATTGCATCTTAAGGAAACTTCTTTTATG

GGAGTAATCACCACAGGATGGATAGTTTAGTCCATATCTATAAAGGACTTGAAACAATTTAAAATGACTCACAGGGCAGCTGCATCAG|

CTGC|ATCCTTTTTCTGTGGTTATCTACCTTCTTTCTGATCACCTTCCTCATTTGTTGAAGACTTTGGCTCCTGGATCACAATATTCTT
 >chr20:51076764-51077073 + E=5e-171
TCTTCCTCCAGGTCAGACAACACTCTCAGAGATTTTGACATCTATGTTGAATTAGTGAGTGAGGGCCAGGGCTACTCACTATCCTGCCA

TGGGATACAGGGAATATAACGTAACAAAGGATTGTTTCACATCCTTGCATTTCTTCCTAGCATCCTGTTGGAAAGTCAGCTAGTTAAAA

AAACCTTATTATAATTATTTGGACCTAGAACCCAAATTCTATTTTAT
