# Supplementary material for: Chromothripsis during telomere crisis is independent of NHEJ, and consistent with a replicative origin
Source: HighWire-hosted journal article supplement (doi:10.1101/gr.240705.118), 2019-03-14
Supplement: Supplemental_file_1.zip [file contig.3.DB46_length_879_mean_cov_9.54721274175.docx]

**DB46_length_879_mean_cov_9.54721274175**

AAGGAGAATCAGCAGCTCTACCGCAAGAGTCAGGCAACGCTGGTGCTAGTCAAGGGACTTGGAGAAGGTGACTTATTTTGCCTTTCATC
 >chr11:91069753-91069935 + E=1e-77 p=3e-03
CACCACTACAGACACAGCTGGGGCTTCTCTCACAGGAAGCAGATAGATAGATAAGCATATATATAAGCATATATAGATATAAATATATA

TA|AGCA|GATGAAAAGAGGTGGCTGTCTGATCTGAATAGCTGGAATACTGGGTCAGGAGTGTTTCTGGGAAGTGGATAGGTTTCCTGC
 >chr11:91070156-91070371 + E=2e-117
TGACCTGGCAAGGGAACTGAGGTGGCTCCTACTCTCCCCTCTGTTAAGACTTCAGTGCATTTCACTGACAGCTTCTCTAACCACCTCTG

TCAAAGCTGGGACTTCTGCCCATCATTGGATATTGCAT|TCA|GTGCTCAAAGACAGGGCTTTTTAATTAACCCAATCAGATAAAAATA
 >chr11:91071016-91071503 + E=5e-281
AAGCAAAATGAATCAAAAGAAATGAACAAAGTCTCCAAGAATCTGTAAGATGGCCAACCCTAAGAATAATCGGTATTCCTGAGGGAGAC

GAGAAAGCAAAATGTTTGGAAAATTTATTTGAGGAAATGATCGAGATAAACTTCCCTGGCCTTGCTAGAGATTTAGATATCCAAATACA

AGAAGTGCACAGAATTCCTGGGAGATTAGTTGCAAAAAAGTCATCACCAAGGTGTATAGTTATCAAGCTATGTAAAGTCAATATAAAGG

AAAAATTCTAATAGCAATTAGACAAAAGCATCAGATAACTCATAAAGGAAAACCTATCAGACTAACAGCAGTCTTCTCAGCACAAACCG

TAGAAGCCAGAAGAAATTGGGGTATTATCCTTAGCCTCCTTCATACAGAATAACTGTCAGTGAATAACTTTGTATCCAGAAA
