# Supplementary material for: Chromothripsis during telomere crisis is independent of NHEJ, and consistent with a replicative origin
Source: HighWire-hosted journal article supplement (doi:10.1101/gr.240705.118), 2019-03-14
Supplement: Supplemental_file_1.zip [file contig.3.DB47_length_487_mean_cov_6.27104722793.docx]

**DB47_length_487_mean_cov_6.27104722793**

CGGGTGAATGACGGCAGCTGTGCCAATGGGAATAGGCTACCTGGGAGCCATGCGTGTACAACATGCAGGCTTGCTCCATGTTCCCTCTT
 >chr19:6885358-6885575 + E=6e-101 p=5e-03
CTTTATCAACCACGTGTACGGTAAAGGAACAGGCAACACGGTCCTGGCCAGGTAGAGACCCCATCTGCATAATAAAATATTAGGGTGGG

CAGCCAGCTTCTTTGTACTCTATGTAAACGGCACACCTG|C|CTTTCTAGCTCCCGTATCAGCGTTAAGCTAGGGCATATTAATGTGTT
 >chr19:6884728-6884897 - E=4e-90
GTTAGGTTATGGGTGTGGGCAGCCACTGATAGCAGCTGTCACAAGGTACAAAGGAGGTGCATAGAACATCCCCGAATTCTTAGAAAGAA

AAGCTCCACGTGTTTTTGCCTTCCCCTTTTGT|T|TTCTTTCTTTCTTTTTTTTTTTTTTGAGATGGAGTCTTGCTCTGTCACCCAGGC
 >chr19:6885740-6885840 + E=2e-44
TGGAGTTCAATGGCACAATCTCGGCTCACTGCAACCTCTGCTTCCC
