# Supplementary material for: Chromothripsis during telomere crisis is independent of NHEJ, and consistent with a replicative origin
Source: HighWire-hosted journal article supplement (doi:10.1101/gr.240705.118), 2019-03-14
Supplement: Supplemental_file_1.zip [file contig.3.DB48_length_853_mean_cov_28.1043376319.docx]

**DB48_length_853_mean_cov_28.1043376319**

AGGAACAAACTCTTGGTCAAAAAGATTAATATCATAGGATCTCTAGCCAAATTCACCCTTAATAAATAAGTCCAGAGAGTAATTAAAAA
 >chr7:51689964-51690341 + E=7e-206 p=2e-02
AAAAAAACAAGAAAACATGGGGACCAGGTAGGATTAGGATGAAGGGCAGAGGGTTCTAGAACTATTTTTCTTTTGAAGCCTCTTCCATT

AGTGAGGATGTCTCCTTCATATTTATTTTTGGTGCTAGGTTTCATAGTGCTCAACACATAGACCTGGGCTGGAGGCTGTGGAGAAAGGG

CAGAGACCACATGCAGCTGTTTATCCCAAAAGTCAGTTTCCAAGAGCCGGCCTAACCCTGAAGGTGGATGGTTCAAAATATCTCATTTT

TATGAGAAATAAAGGTTC|A|AGACAAATAGATGGGAATTAATTAAACCAAAAAGCTTATGCCAGCAAAAGAAATAATCAGCAGAGTAA
 >chr7:51606603-51606682 - E=1e-35
ACAGACA|ATT|TGCAGCAACCTAGGTGAAACTGGAGACCATTATTCCAAGTGAAGTAACTCAGGAATGGAAAACCAAACATTGTATGT
 >chr7:51605557-51605960 - E=1e-230
TCTTACTCATAAGTGGGAGCTAAGCTGTGAGGATACAGAGGAATAAGAATTTTACAATGGACTTTGGGGACACAGGGGGAAGGGTGGGA

GGGAGGTGAGGGATAAAAGACTGTACATTGGGAGGAATGTACACCGCTCAGGTGACTAGTGCACCAAAATCTCAGAAATCACCACTAAA

GAACTTATTCATGTAACCAAACACCACCTGTTCCCCAAAAACCTATTGAAATAAATAAAAGTAATAAAAATAAAAATAATTTTAAAAAA

CAAATACAGTCATACATCACTTAACAACTAAGATGTGCTCTGAGAAATGCATCATT
