# Supplementary material for: Chromothripsis during telomere crisis is independent of NHEJ, and consistent with a replicative origin
Source: HighWire-hosted journal article supplement (doi:10.1101/gr.240705.118), 2019-03-14
Supplement: Supplemental_file_1.zip [file contig.3.DB48_length_918_mean_cov_31.3224400871.docx]

**DB48_length_918_mean_cov_31.3224400871**

C|TCTTAGGGCTTCATAAAATTAATCCATCATGTTCCTATAGCCTATTTCCTAGTGTTATCAGGTTATCTGTAAAAGCAATTCCCTTAC
 >chr7:49466425-49466839 - E=4e-234
AGATATTACTGAGAGACTTGACCTTGAATTCCCTAAGAGAAGACAGGGCTATACTTGGACATTATTGTCTGAAGCTAATGTATTCATTA

AAATAAGCTGGAGCCATTCGGTCAGCTCTCCTTTTTCCTGGGCTTCCCCATCCTCTTTATTCACAGTCGCATTCTGGACTCCATGTTAG

CTCGTGATCATTCAAGTTCTCATCTTTGGTGCGTGTATCTGAGTCTACTTTAATCTCTCAGCTCTCCTAACTTTCTCCCACCTAATACC

TCACCAGCATTATGTTATTTCTCTCTTCAAAATCACTCCAAAACCATTTTTTGCATTTAT|AACCTGATAACACTAGG|AAATTAGACA
 >chr7:494
GACATGATAAATGGAATCCGAAAATAAAAGGAACAGCAAACTACCACATAAAATTTTCATTTTACTAAGTATAGGTTTCCTATAGTCTG
72518-49472925 + E=7e-233
ACTTTAAGTCTTTTATTCTTCATAACTGCCAGCTTTTACACTTGGAGAAACAAGAAACACATTTCACCTAGGAAATGTTTTTTAATGCC

GAATACTGATTGGCAGAGCACAGTGAAATGACTCTCATGGCATCTGCATGTTTCTAGTCTGCTTCTACAGGGGCTCCTTAGATTTCTCT

CTGAGTATAGATGAAGTTTTCTAATTAATTTCCCTTTCTCCATCATTGCCCCGTCAGAATCTACCATAAATGTTATCCCATGATTAGCA

TATGTGTCACTTTGTTGATTTACACACACACACATACATAC|C|ATGGAATACTACTCACCCATAAAAAAGAATGAAAAATGACATTTG
 >chr9:197657-197711 - E=1e-02
CAAAAACAT|AGGAAAAACTAGAGAAAATTATTA
