# Supplementary material for: Chromothripsis during telomere crisis is independent of NHEJ, and consistent with a replicative origin
Source: HighWire-hosted journal article supplement (doi:10.1101/gr.240705.118), 2019-03-14
Supplement: Supplemental_file_1.zip [file contig.3.DB49_length_386_mean_cov_10.0984455959.docx]

**DB49_length_386_mean_cov_10.0984455959**

AACTACACAACATCATAACACTACGACTCCAAGCACACACA|AAAACAAAACAAAAAAACAATGCCGGGCAGTGACTGTCACCTGTAAT
 >chr19:53278504-53278757 + E=6e-141
CCCAGCACTTTGGGAGACCAAGACGGGCAGATAATGTGGTCAAGAGATTGAGACCATCCTGGTCAACATGGCAAAACCATGTCTCTACT

AAAAATACAAAAATTAGCTGGGTGTCGTGGTGCAGGCCTGTACTCCCAGCTACTCAAGAGGCTGAGGCAGGAGGATCGCATGAATCCGA

GAGGTGGAGGTTACAGTGAGCCAAGATC|ATTC|CATTGCACTCCACCTTTGGGGACTGAGCGAGACTCCATCTTAAAATA|AGTA|AA
 >chr19:53006157-53006204 - E=9e-11 >
TAAATAGATAGAGAGATACATATATACATACA|TACchr22:36613242-36613276 - E=6e-06
