# Supplementary material for: Chromothripsis during telomere crisis is independent of NHEJ, and consistent with a replicative origin
Source: HighWire-hosted journal article supplement (doi:10.1101/gr.240705.118), 2019-03-14
Supplement: Supplemental_file_1.zip [file contig.3.DB49_length_533_mean_cov_6.43902439024.docx]

**DB49_length_533_mean_cov_6.43902439024**

TTCAGACCACACAATTTCCAAAAAGCCAAAAACTTAT|CAAAAACTAGTTTTCTGGAGTTGGGAGAATGAGGAAGATTCAATATTCCAA
 >chrUn_gl000225:159384-159463 + E=8e-09
GTGACCTTGGTGGCATTTCATAGCTCAA|AAAAAAAAAAA|AAAAATTTTATTCCTTTTTCATTTCTGTTAGGGAATGTTTAGTTTTTC
 >chrY:59017441-59017798 + E=1e-181 p=0e+00
CTCTTTGATAATGAAAATTTTGTTAACAAACATTGCTTTGGACCAATCTTCCTTTTCACAAATCACTGAGGTGTGTCTATCCACAAGTT

CTCAGTTCAGCCTACATTTTCCAGTCTTCCATTTACCTATTCAACTAATACCTGAGTGCCTGGCATGTGTCAGCCCTGTGAACATGCTG

GTGACAGTGTGAGCAGGCAGGGCTGGTTCCTGTCCTCATGAAGCTTATACTACCTGAGGCTGGGGTGTAGAAATCGACACATTAAAAAG

TCTACAGAGACTTTAAAATATATATATATATATATAT|ATATATA|TATATATATATATATATATATATATATATATATATCTTTAACA
 >chr5:24303166-24303210 + E=8e-12
T|GAT
