# Supplementary material for: Chromothripsis during telomere crisis is independent of NHEJ, and consistent with a replicative origin
Source: HighWire-hosted journal article supplement (doi:10.1101/gr.240705.118), 2019-03-14
Supplement: Supplemental_file_1.zip [file contig.3.DB49_length_750_mean_cov_8.95466666667.docx]

**DB49_length_750_mean_cov_8.95466666667**

AAAAAAGTCTGATACTTAAAAAAA|ACATAAAGCAAAAACACTGCACAGACCATGGGGTTGATAGGCTCAAAGCATCATGTGGTATAAA
 >chr12:48233266-48233593 - E=7e-185
TAGCTCACTGGTGTGCTAGGAGTATTGATTCCTTTAGCCCTGGAGCAAGCAAACAGGGCCTGCCAGGAGTGACCACAGCCCTTCAATTT

CCCCAGCTTCTACCAGGCTCCTTGCAGGCTGCCTGTGCAGTGCAGGTCGGTCTGCCTGCCCCATGGTCCCTGCAGATGACAAGAAGGAT

GGATGCTGTCTGACACCTCCAGCATGGCCAAGGAGATGGCTCATCATGCTGACATCCTATAGGCAACTAGTCCTCATTGTGGGC|A|TA
 >c
ACAACATTTGGCCAGCTTTCTCTTTGTTTCCACTGGACACAAGCTCACCTACCAGCGACAGGAGGGGGACAATGCTCCCGCGCCTCCTC
hr12:48410984-48411361 - E=5e-215
CCTCTTTCTCCCCTGGAACTGTGCTCAGACCTAGTCAGGGGACAGGGAGAGCCTCATTCACATGTGGCTTATGGCCCAGCGACCTGCTG

GCTAACAAAGCTTTCTAAGGATATCTGAGAGAAGCTTGGTACCCCATAGGAGGAAGGGACAGCAACAGAGGTGCCCTGCCCGGTATCCT

GGGACCCAACCAGTGCTGCCCTCTCACCTCATCCCAAGATGGGCAAAGCAGCACAGCTTGCTCTCTCGTAACCTTCCTGAGGGCACCAT

TGTCTTGACCGAGT|CCTC|AGGAAGGTTACGAGAGAGCAAGC >chr12:48411009-48411036 +
