# Supplementary material for: Chromothripsis during telomere crisis is independent of NHEJ, and consistent with a replicative origin
Source: HighWire-hosted journal article supplement (doi:10.1101/gr.240705.118), 2019-03-14
Supplement: Supplemental_file_1.zip [file contig.3.DB49_length_789_mean_cov_15.7148288973.docx]

**DB49_length_789_mean_cov_15.7148288973**

GATCC|GCCCGCCTCAGCTTCCCAAAGTGTGAGGATTACAGGGGTGAGCCACTGCACCCGGCTATAAATAGTCTCTTAATAGATTTCCT
 >chr5:31906276-31906723 - E=7e-247 p=0e+00
ACATCATTGATAAAAACCAAACTAAGGCCGCGCATGGTGGCTGACACCTGTAATCCTCACACTATGGGAGGCTGAGACGGGCTGATTGC

TTGAGCCCAGGAGTTCAAGACTAGTCTGGGTAACATGGCGAAACCCCGTCTCTACCAAAAATACAAAAACTGAGGTGGGAGGATCACCT

GAGCCTGGGGAGGTCAGGGTTACCACTGCACTCCAGCCTCTGCAACAGGGTGAGACCCCATCTCAAAAACAACAACAACAACAACAAAA

TCAACGAACATTTGGACATCGGTAACATGAAGTATATTTTACTTGTGTGGTATCTCAGTTAAAATTACTTCAATTTCAGGCCAGGTGTG

GTG|GC|TCATGCCTGTAATCCCAGCACTTTGGGAGCCCAAGGCGGGTTGTCACTTGAGTTCAGGAGTTTGGACCAACTTGGCCAACAT
 >chr12:101738734-101739009 - E=1e-50 p=0e+00
AGTAAAACCCCATCTCTACTAAAAATACAAAAATTAACTGGGCGTGGTGGCATGTACCTGTAATCCCGGCTACTTGGGAGTCTGAGGCT

GGAGAATAGCTTGAACCTGGGAGGCAGAAGTTGCAGTGAGCCAAGAACACACCACTCCACTCCAGCCTGGGTGACAGAGTGAGACTCCA

TCTCAAAAAAA|T|AAAATAAGGCTGGGCGTGGTGGCTTATGCCTGTAATCCCTG|TAATCAATGGAGATTGAGCCCATTCTG >chr14:91545513-91545554 - E=8e-10
