# Supplementary material for: Chromothripsis during telomere crisis is independent of NHEJ, and consistent with a replicative origin
Source: HighWire-hosted journal article supplement (doi:10.1101/gr.240705.118), 2019-03-14
Supplement: Supplemental_file_1.zip [file contig.3.DB49_length_1021_mean_cov_13.8148873653.docx]

**DB49_length_1021_mean_cov_13.8148873653**

ATTCACTAATCAGTTGTCAGTTGGCAACTTGATT|GCAAACGAGCCTGACTCACACTGAAGTTATCTGCAATCAAGTTGCCAACTGACA
 >chrY:59018596-59018630 - E=2e-08 >chrUn_gl000225:160585-161216 + E=0e+00 p=0e+00
ACTGATTAGTGAATGAAGCTGAGCGCCAGGACTCACGACAGCTGTCTGTTTCATAAACACGCCCTCGTTCCTCCTTTTGGCCGACTACT

AAAGGGTTTAAGTGTCACGCAGCATTTAGATGTTATGCAGAATGAGCAACAAGCAAAATGTAGGTGCAATCAGATAAGAGTGGAGAATT

ACCAGTATCTTTACAATCACCTGTTGGGCATTTCTGTTGATAATCACCAATTCAGAACAGCAAGGACTGAGAAGCCACAAGATTCCCTT

AAAAGGCCTCATCCACTTGCATACTTTTGTTTTCAGGAAACAAAAATTATGTTATGTGGGCTCACAGTCAATAGATTTTTGTTCTGATT

TGTATTTCCATGATACATAATTAAGTTTTGTGGTTTGAGGTTGAAAGAATTCTGAATGTGTATGCTAACACTGATTCACATTAAAGCTA

AGCACTAGGCTGGACACGATGGCTTACGCCTGTAATCCCAACACTTTGGGAGGCCGAGGCGGACGGATCACTTGAGGTCAGGAGTTTGA

GACCAGCCTGGCCAACATGGTGAAACCCCATCTCTACTAAAAA|TACAAAAAAAAAAATTA|GCCAGGCGTGGTGGCACGTACCTGTAG
 >chr5:31905952-31906291 -
TCCCAGCTACTCGGGAGGCTGAGGCGGGAGAATGACATGAACCCGGGAGGCAGAGCTTGTAGTAAGCCGAGACGGTGCCACTGCACTCC
E=7e-183
AGCCTGGGCAACAGAGCGAGACTCTGTCTCAAAAAAATAATAATAAAAATAAAAATAAATAAAAATAAAATAACCTCAATTTCACTCTT

AGCAACACATACACACACTTAAAAACCAAGAACCACCACTGAAGTTAGGCAAGAATGGGGGAGGGGAGCTGATATAAAATAGTGATGTG

TAAGTGCACTCTACCAAGGAAAGATGATAACAATAAGCAGACTCC
