# Supplementary material for: Chromothripsis during telomere crisis is independent of NHEJ, and consistent with a replicative origin
Source: HighWire-hosted journal article supplement (doi:10.1101/gr.240705.118), 2019-03-14
Supplement: Supplemental_file_1.zip [file contig.3.DB50_length_542_mean_cov_8.46494464945.docx]

**DB50_length_542_mean_cov_8.46494464945**

AGAACATACAATGTTTGGTTTTCCATTCCTGAGTTACTTCACTTTGAAAAATAGTCTCCAGTCTCATCCAGGTTGCTGCAAATGCTGTT
 >chr5:164898210-164898391 - E=3e-97 p=0e+00
AATTCATTCCTTTTTATGGCTGAGCAGTATTCCATTGTGTGTATATACATATATCAAAACTGTGATATATCACAGTATTCCATTGTGTG

TAT|CACAGTATTCCATTG|TGGGCATTTGGTATGGTTCCACGA|TTTT|ATAGTTTCAGGTCTTAGCTTTGTGTCCTTAATCCATTTT
 >chr5:164898076-164898104 - E=3e-05 >chr5:164897074-164897391 - E=
GAGTTGATTTTTGTATAAGGTGAGAGATGAGGATCCAGTTTCATTCTCCTACATGTGGCTAGCCAATTATCCCATTTGTTGAATGGTGT
4e-167
GTCCTTTCCCAACTTTATGGTTTTGTTTGCTTTGTTGAAGATAAGTTGGCTGTAAGTGTTTAGGTTTATTTCTGGGTTCTCTGTTCTGT

TCCATTGGTCTATGTGCCTATTTTTATTTTTATACCAGTACCATGCTGTTTTGGTGAATATGGCCTTATAGTGTAGTTTGAAATCAAGT

AGTGTGATGCCT
