# Supplementary material for: Chromothripsis during telomere crisis is independent of NHEJ, and consistent with a replicative origin
Source: HighWire-hosted journal article supplement (doi:10.1101/gr.240705.118), 2019-03-14
Supplement: Supplemental_file_1.zip [file contig.3.DB50_length_546_mean_cov_4.93223443223.docx]

**DB50_length_546_mean_cov_4.93223443223**

TCACCACTCCTCAAACATCCCTTAACATCGCAGAAATTTAACCAGCTCTGTTAAAAGTGTATATTTTAGACTGGAATATATATTTTGCC
 >chr3:177740826-177741060 - E=2e-124
CCTCAAGTTATAATAATGTATTTGAGATTCAAAAGAAATAAAAGTGGATTGCACAAAATACAGCTCATTTCCCCAGAAGGTAAATGTTA

AGGGATTTTTTTTTAAGCAGACCAAGTGACTTCTTTCATTTTATATATATATATA|AAATG|AAACTATCAAATTGCGCATTTCAAATG
 >chr10:36330477-36330520 -
GGTGAATTTTGTGGTA|AAATG|GCTATTGTAAGGAATGAAGATAGTGGGATTTTGACAGTTTCCTGATCCTGCTTTATTTTTTCCCCA
 E=3e-14 >chr10:36439438-36439698 + E=8e-145
AAATGTTTCTGTATCTGAAAAACTGAAACTATAGTCATCCTAAACTTCTGATTCTGTAAGCAGAAGAAACAGCAACGGCTTGAATTTTT

ACTTCCTTCTAACATTTTCTATTTATGATTTAATATGAGTGATTATTCTAATATTTTAGTGTAGGTCATTATCACTTGGTGGTATTATT

AAAAATACAAATGCCT
