# Supplementary material for: Chromothripsis during telomere crisis is independent of NHEJ, and consistent with a replicative origin
Source: HighWire-hosted journal article supplement (doi:10.1101/gr.240705.118), 2019-03-14
Supplement: Supplemental_file_1.zip [file contig.3.DB51_length_286_mean_cov_8.74825174825.docx]

**DB51_length_286_mean_cov_8.74825174825**

TCATGAGATCTGCTGATTTTACAAGTGTTTGATAGTTCCTCCTGTGTTCACTTCTCCTTCCTGCTGCCTTGTAAAGAGGGTGCCTTTCT
 >chr6:145790247-145790361 - E=3e-48
TCCCCTTTGCCTTCTGCCATAA|TTG|CTTCATATTTCTCATCAATACAAAACAGCTGAATACAAAAAGCAGCTGAGGCTCCCCTGTAG
 >chr20:20144755-20144871 - E=2e-55
ATGGGGCGGAAGTGGACGGGCTCTTCAGGCAGTATGAGCGATGCCAAG|CTC|ATGATCCTTCCACCTCGGCCTCCCAAAGTGCTGGGA
 >chr21:10171922-10171984 - E=5e-26
TTACAGGCATGAGCCACCACATC
