# Supplementary material for: Chromothripsis during telomere crisis is independent of NHEJ, and consistent with a replicative origin
Source: HighWire-hosted journal article supplement (doi:10.1101/gr.240705.118), 2019-03-14
Supplement: Supplemental_file_1.zip [file contig.3.DB51_length_443_mean_cov_4.57110609481.docx]

**DB51_length_443_mean_cov_4.57110609481**

ATTGATTATAAGACCAAATCCTCGAACATCTTAAAACATTTTTACATTGTAAATTAGATGGGAAAAAAAACTGAAAATTAAGCTTTGTG
 >chr1:72407913-72408154 + E=2e-124 p=0e+00
AATTTTTCTTACTTTTTTCATGCAGAACTATACTTAACGCCTCTCTGAAATCTGTGAAGTTTAATGTAATCAAGTGATGGTCTTAATTC

ATATAATTTAGTTTTACTTTAATGCACAAATTAAAATTCTTTAAATCTATATATATATATATA|GCT|AAGCTAAGTTTATATATATAT
 >chr3:77041488-77041
ATATATATATATATATATATA|G|CAAGCTAAGTTTTTCTTGGCAAATAAACTTTTCACACTTTCAAGGATGTCACTGTCCATTGTAGT
530 - E=1e-10 p=1e-03 >chr1:72517158-72517314 - E=2e-82
TTTCAAACTGGTCCCAGGAAATAAGAAATTTTTTTCGATGCAACAAAATAATATCGCATAATAGAAATGACAACAATTTTGTAGATATA

GT
