# Supplementary material for: Chromothripsis during telomere crisis is independent of NHEJ, and consistent with a replicative origin
Source: HighWire-hosted journal article supplement (doi:10.1101/gr.240705.118), 2019-03-14
Supplement: Supplemental_file_1.zip [file contig.3.DB51_length_524_mean_cov_4.20229007634.docx]

**DB51_length_524_mean_cov_4.20229007634**

AGGAAACAAGAAGTTAATTTTCCTCTAGTCAATTTATCTAATTACATGTAAGTCACAACAATTTTATATATTTCTTTTCTATTTCATTT
 >chr11:91105010-91105121 - E=4e-55 p=0e+00
TTTCTCATATATATATATAT|AT|TATATATATATATATATATATATAATATTAT|ATATTA|GTATAGAGTTTTCATGGTTTCTCATG
 >chr2:31280157-31280196 + E=8e-09 p=4e-02 >chr11:91104065-91104
ATAGGTAACATTTGCTTCAATCTAAGAACATTTATCTTTATTGAATACTACCACATGCCAGGTATTGTGCCAGCTGCTTTATCAAATTA
442 - E=2e-206
TCTCATTAATCCTTGTAGTAACTTTCCAAGTGTGTATCGTAATACTTATTTTACAAATGAATCCTCTGAAACCAGAGAGTTTAAACAGT

CAAGGTCACATACCTGGTAGGTTGTAGGACTAATACTTGAAATCACACATCTCTGTTGTTATGTAATACATTAATATAAGACTATACCT

ATTCATAGATTTGAATTCTAATCTCTCACCATTAGGGCCAAACTTGTAGAAAAAAACATAAGGTATGATATCTGCCAT|GAAAT
