# Supplementary material for: Chromothripsis during telomere crisis is independent of NHEJ, and consistent with a replicative origin
Source: HighWire-hosted journal article supplement (doi:10.1101/gr.240705.118), 2019-03-14
Supplement: Supplemental_file_1.zip [file contig.3.DB51_length_603_mean_cov_11.2006633499.docx]

**DB51_length_603_mean_cov_11.2006633499**

TTTCACAAAACAGACGCTTGCACTCATTGAACAAAGCATTGCTGAAAGAAAATCAAAGGAACCCAAAGAAGAAAAGAAAGATGATGATG
 >chr2:167168113-167168225 - E=1e-43
AAGAAGCCCCAAAGCCAAGCAGT|CATGATATGGTTATTCACTAAAT|TTCACTAAATTTCACTAATCTCAATTTAAAATAATTTTTAT
 >chr2:167167918-167168120 + E=8e-110
ACAGAAGGAAGCCAACAGAAACTGACCACTGAAGTCAAAATAAACTCACCTTTTTGTCTGCATAGTAGGGGTCCAAGTCCTCCAGGGGC

TCTGACACCATGCCGGGAGGAATGTCCCCATAGATGAAGGGCAGCTGTTTGCCAGCTTCCAAGTCACTGC|TT|CCCCCTCCTCATATC
 >chr2:166959828-
CCAAAAGAAGTGATTATATCCTCTTCTGTGCTTCCTCCGTGTCTCAAAGATAACTTATTGTTATACTTCCTCAGTATTTATTTATTTAT
166960096 - E=1e-149
TTATTTATTTATTTATTTATTTATTTATTTAAGACAGAGTCTTGCTTTGTCACCCAGGCTGGAGTGCAGCGGTGCGAACTCGGCTCACT

GCAACCTCCACCTCCCGGGTTCAAGTGATTCTCCTGCCTCAGTCTCCCGAGTAGCTGGGACCACAGGTGCCTG
