# Supplementary material for: Chromothripsis during telomere crisis is independent of NHEJ, and consistent with a replicative origin
Source: HighWire-hosted journal article supplement (doi:10.1101/gr.240705.118), 2019-03-14
Supplement: Supplemental_file_1.zip [file contig.3.DB51_length_665_mean_cov_11.9684210526.docx]

**DB51_length_665_mean_cov_11.9684210526**

AGTAAAGATAGTTTTCATATACCATAATTATTGGGCATTTATTATGGATTGGGAAGTTATCCTTGTGGTTAGTATCTTTCATTGTTGTA
 >chr18:69194838-69195086 + E=2e-137
ATACATTTATCATACTTAATGAACCACAATTGAATATCATTATTAACTAACATCCGTACTTGATTCAGGTTTCCTTGGATTTTACCTAA

TGTCCTTTTTCAGTTTCTGTATCCCATACGGTATACCACATCACATTTAGTTGCCGTGTATCTTGACTGT|TCAGTCAAGTGTTACTTG

AAACACTTGAAACAAGTG|TTTTCAAGAAAACACTGGCAAACTGCCATCAGCACATCAAAAAGCTTATCCACCATGATCAAGTAGGCTT
 >chr18:69197074-69197237 + E=3e-83 p=9e-03
CATGCCCAGAATGCAAGTTTGACTCAACATACACAAACCAATAAATGTGATTCATCATATAAACAGAACTAAAGATAAAAAC|CACACA
 >chr6
TGCAG|TGAGAAGTGAAGCCAGGATTCAACCCAGACTGTTTGACTCCATTATGCTATGCTTTATTCCCAGTAAACTGAATTTATTAATA
:79768077-79768306 - E=5e-126
ATAACACTTGGCTACTCAAGAAAATTGGTGTTAGTCATTTTTTGTAAAAGGGAACCAAATATTTATAAAATCAAATATAATATTTTAGG

CCACGTCGTTGATGGTCAGATTAGTAAATACTGCTGACAAGGAGAG
