# Supplementary material for: Chromothripsis during telomere crisis is independent of NHEJ, and consistent with a replicative origin
Source: HighWire-hosted journal article supplement (doi:10.1101/gr.240705.118), 2019-03-14
Supplement: Supplemental_file_1.zip [file contig.3.DB51_length_666_mean_cov_5.36336336336.docx]

**DB51_length_666_mean_cov_5.36336336336**

ATCAATATTTTTGTCCTCACATCTGACTATGTAAGGAAGTTTCACAGCAAGAGTTCTATAGTGTTCTTGACAGACGTGGCAATAACAAT
 >chr18:66748962-66749205 - E=2e-134
GTTAAGATAATATTGCAAAAGTAAAGAGCTGCATGAATATTCTAATCACAGGTTTCTTAAGCAGTGACTCCTGTGTGCCTATGGATTAC

ATAAACTAAGAAATATAAACCTCTGTCATACAAATGACTACGTTTAATGTTAAATCATGAAAATA|A|CATTCTGTGTTTTTAAAATTT
 >chr18:68501556-6850
TCCTTAAGACTTTCTTTTTGATCCAAAGGTTATTTACAAGCGTTTCATTTTGTTTGCCATTACGTGATGATTTTTCTTGTCATCGATCT
1724 + E=3e-71
CTTATTGAGTTCTACTTTTATTCTATTTTGGTAAAGAAATGCTGTGTCTGATTTTAG|T|GCAATTAACATTTTTTACATACTCTGATT
 >chr18:68644602-68644832 - E=
ACTGAATTTTAAGGGAGGTAAGATCTTCAACTTTTCTAGATATTGTCATTTATTCTTGCAGAGTATGGACTTTATTTCATCATCAGTGT
1e-126
TTGAGTTGTTTTTCTTCCTTATAATTACCAACATGATACTGAGTCAAATGGTATTAAGTTGATGCCTTAATGTACATAAACCTACTTAC

TAGTGATGTTAAGCACTTTTTT|TTTTTTTTTTTTCTCTCTTTATCTC
