# Supplementary material for: Chromothripsis during telomere crisis is independent of NHEJ, and consistent with a replicative origin
Source: HighWire-hosted journal article supplement (doi:10.1101/gr.240705.118), 2019-03-14
Supplement: Supplemental_file_1.zip [file contig.3.DB51_length_681_mean_cov_5.43465491924.docx]

**DB51_length_681_mean_cov_5.43465491924**

TAGACAGGACAACATCTGAATTTTGGAACTACAATATCTTACATGATGCTTTGCTCAAACTAGCTCTCAATAATTTTATTTATTCACAT
 >chr6:117020747-117021075 - E=1e-182
TCAATCATTTCTTCATTCATTCAATTGGAATTAAAAAGCCAAATAATAGGTATCAAGAGGTCTGGGTTTTAGTCTGGACTTAGGGCTTA

TATAAAGGAATGGAACCAGATTTCATGATCTCTAGTTCAAAATAATTGACAATAAAACTGTAACATGACTAAAGTAGCCTCTTAGAGAC

CCTTATTGTAAACATTCTCAACAATTTTTCACATTCACACATGCAATACATTCCTTTAC|TT|TTTCTTACTTTCTCTCTCTCTTTCTC
 >chr18:68644562-68644607 -
TCACTTTCTCTCTCTC|T|ACAGTGGTAAAGGGCCATACATCAAGAAAACATAAAAGTCATAAATGCGTATGCATTTATACACTGTAAA
E=2e-15 >chr18:68501778-68502089 - E=2e-175
CAACAGTCCTACAAAATATGTGAAGCAAAAACTGATCAACTGAAATGAGAAATAACAGACAAACACCACAGTTATAGTGAAGGCTTCAA

GACTCATCTTTCACAAAATTGAAGAGAAAATCTAGAAGGATAAAGAACTCAACAATATTGTCAACCAAAAAGATCAAATCAACATCCAT

AAAACAATTCACTCAACCACAACAAAATATATATGCTTTCTTTATACTTCCACAAAATACGT
