# Supplementary material for: Chromothripsis during telomere crisis is independent of NHEJ, and consistent with a replicative origin
Source: HighWire-hosted journal article supplement (doi:10.1101/gr.240705.118), 2019-03-14
Supplement: Supplemental_file_1.zip [file contig.3.DB51_length_688_mean_cov_6.75872093023.docx]

**DB51_length_688_mean_cov_6.75872093023**

TACCCTCTTAGGTTCTGCAGCTGGGCCTGAGAATTAAACTGACAAAAGACAGAGAAACAGGAGAAAAGCATAGACATTTTATTTGATGT
 >chr6:14465561-14465778 - E=9e-119 p=2e-02
TAATATTTTTGCATGGCATAGGAGACTTCACAGAAAAAAGAAATGAAAAGGCCCGAGAGGGTATATACCATTTCAACAAAGAATGATCA

ACTGTGGAGATGTGAAAGATCAACTGTGGAGCGAAAGG|A|CTTAGATTTTATTTATTTATTTAGAGACGAAGTCTCCCTCTGTCACC|
 >chr6:10510302-10510354 - E=2e-19
CAGG|ACAACTGTGATTGCCTGAAGTTGAAGAAATATAGTGTCCCTTGCATTCAAAGGTGACATCAGTGATGGTGATGGTGGCTCTGCA
>chr6:10513785-10514209 + E=2e-240
TGGGAAAAAGAGGTGCCAAATGAACACACATTCCACCTGTACTCCACATGGGAAAAAAACCCTGAGCTGGCAGCTGTGGCCGATTTGCT

AGGGTCTTAATTTGTGGTTGACCTAGACAGAGGTGCCCAACTGTGCCTGGCTTTTGTGAAGTGGTCAGCTGGCCCCACTGGCTCATGTT

CAAAGAGTCACCTGATTTTTTAAATAGAAGAGCTACCGACTTGTGGTTGATCCTCCTTCTTTTAAGTAAATGGTCATATTGCACTTCTT

GCTGCAAATAAGTTGCTAGAGCACATTTCTCAAGTCTGGGCAGGGACCTGCAGACTGACTTCAGCAATG
