# Supplementary material for: Chromothripsis during telomere crisis is independent of NHEJ, and consistent with a replicative origin
Source: HighWire-hosted journal article supplement (doi:10.1101/gr.240705.118), 2019-03-14
Supplement: Supplemental_file_1.zip [file contig.3.DB51_length_714_mean_cov_7.60924369748.docx]

**DB51_length_714_mean_cov_7.60924369748**

CG|CCTGCGTTGGCCTCGAGCCCCCCCTCCCAGCCTTGTTCTATCTCTTTTTTCGTTAATGTGTCCTTCTTCACAGCCTGTTTAGTGCC
 >chr20:23414292-23414561 + E=6e-126
ACGTTTCACAATTTTGTATTGGTTTTTTTTTTAGAGGTGGGGTCTTGCTGTGTTGCCCAGGCTGATCTCGAACTCCTGAGCTCAAGTGT

CTTCAGCCTTGGCCTCCCAAAGTGTTGGCATTACAGGTATGAGCTATCACATGTGGTTTGAGTTTTGTGCTTTTTTTGGTTGGTGATTT

TGCTG|TTATTATGACT|ACTTATAAGTGAAAACATGCGGTATTTGGTTTTCTGTTCCTGCATTAATTCACTTAGG|ATC|ATCATTCT
 >chr20:23391053-23391114 - E=6e-25 p=2e-03 >chr20:234
CAATAAACTATCGCAAAAACAAAAAACCAAACACCGCATATTCTCACTCACAGGTGGGAATTGAACAATGAGAACACATGGACACAGGA
58313-23458687 - E=3e-207
AGGGGAACATCACACTCTGGGGCCTGTTGTGGGGTGGGGGGAGAGGGGAGGGATAGCATTGGGAGATATACCTAATGCTAGATGACGAG

TTAGTGGGTGCAGCGCACCAGCATGGCACATGTATACATATGTAACTAACCTGCACAATGTGCACATGTACCCTAAAACTTAAAGTATA

ATAATAATAATAATAAATCATTGTCCACGTCTGTCAAGAAGAATTATACAAACAGTTGCTAAGTGTTTTCTTTTCATGAATTTTTTTAA

AAGGCAG
