# Supplementary material for: Chromothripsis during telomere crisis is independent of NHEJ, and consistent with a replicative origin
Source: HighWire-hosted journal article supplement (doi:10.1101/gr.240705.118), 2019-03-14
Supplement: Supplemental_file_1.zip [file contig.3.DB51_length_749_mean_cov_10.6608811749.docx]

**DB51_length_749_mean_cov_10.6608811749**

AAGACACCAACGCCCACACGAAATAGAAACCAGAAC|GAAAGAAAAAAAACAAAAAAAAAAAAAAAACAA|TTTGGGAGGCCGAGGCAG
 >chr16:60909502-60909535 - E=5e-02 p=0e+00
GTGGATCACAAGGTCAGGAGATCGAGACCATCCTGGCTAACATGGTGAAACCCCG|TCTCTACTAAAAATACAAAAAATTAGCCAGGCG
 >chr9:121422411-121422703 - E=1e
TGGTGGCGGGCGCCTGTAGTCCCAGCTACTTGGGAGGCTGAGGCAGGAAAATCACTTGAACCCGGGAGGTGGAGCTTGCAGTGAGGCGA
-112
GATCACGCCACTGCACTCCAGCCTGGGCGACAGAGTGACTCCTTCTCAAAGATCAAATAAAATAATTAAAAATATATATATTATTCAGG

CCTAGTCCTTAGAAATAATACTTGTCCATAGACTAGCACATAGAAATAATATCATTAATATTTATAATATATGAAT|AAC|ATATAATG
 >chr9:1215
ATTTTGACACCTGAAATACCTATGCTGTCTCAGATGATGTCAGGGGAACAGTCTAATCCAAGCTTGTCCAACCCGTGGTCAGTGGGCCA
77063-121577385 - E=7e-176
CATTTGGCACAGGATGGCTGTGAATGCAGCCCAACACAAATTTGTAAACTTTCTTAAAACATTATGAGATTTTTTTACAGTTTTTTTTT

TTAGCTCATTAGTTATTGTTAGTATTAGTGTATTTTATGTATGGCTCAAGACAATTCTTCTTCCAATGTGGACCAGGGAAGCCAAAAGA

TTGGGCACTCCTGATCTAATGAGAATGGCAGTGTTCAGAAGT
