# Supplementary material for: Chromothripsis during telomere crisis is independent of NHEJ, and consistent with a replicative origin
Source: HighWire-hosted journal article supplement (doi:10.1101/gr.240705.118), 2019-03-14
Supplement: Supplemental_file_1.zip [file contig.3.DB53_length_282_mean_cov_3.72340425532.docx]

**DB53_length_282_mean_cov_3.72340425532**

ACAGAATAACCTATGGCAGAGACTGCCGGTGCATGACCAA|A|GGCAGGCAACAGGCATTGGAAATGTTTATTGTAAGGTCTAATACAA
 >chr8:84469531-84469572 - E=2e-13 >chr6:47024919-47025107 - E=4e-102
TTCTCAAATTTTTTTGCATTTGTACTGTTTACTATACAAAATTGTCAGCTCTCTATATCCTGGGACTTGGTATACTTCTTACTGTGTCT

GACACAGTACTTACCTTAGTTCTGGGATCATCTACTAAAACAGGCACTGAGG|AAATAAACTTTCCATGGCAATCTATTTTCTGAAGAC
 >chr17:68747096-68747150 + E=4e-21
TTTTGCTTTGTTTGAATT
