# Supplementary material for: Chromothripsis during telomere crisis is independent of NHEJ, and consistent with a replicative origin
Source: HighWire-hosted journal article supplement (doi:10.1101/gr.240705.118), 2019-03-14
Supplement: Supplemental_file_1.zip [file contig.3.DB53_length_322_mean_cov_15.5621118012.docx]

**DB53_length_322_mean_cov_15.5621118012**

GACAGAGAAAGACAGAGACAAACACAGAGAGAAAGAAACAGAAAGAGAGAGAGAGAGAAAGAGACAGGAAGGGAGAGAGAGAGACAGAC
 >chrUn_gl000220:132344-132533 - E=6e-35 p=0e+00
AGACAGAGAAAGAGAATAAGACAGAAGACAGATGCAGTGAGACAGGCAGAGAGAGAGACAGAGAAAGACAGAGACAGACAGAAAGAGAG

AGACAGAGAGAA|AGAGA|GAAACAGAAAGGGAGGGAGAGAGAGACAGACAGACGGACAGGCAGAGAAGGAGAGTAAGACAGAAGACAG
 >chr2:133028733-133028810 + E=2e-20 p=2e-02
ACA|CAG|AAGAAAAACAACCACCAAGAAAGTTAAAATTCTCCAATGGTCGGAAGTTCA >chr2:133033823-133033874 + E=3e-16
