# Supplementary material for: Chromothripsis during telomere crisis is independent of NHEJ, and consistent with a replicative origin
Source: HighWire-hosted journal article supplement (doi:10.1101/gr.240705.118), 2019-03-14
Supplement: Supplemental_file_1.zip [file contig.3.DB53_length_413_mean_cov_4.3583535109.docx]

**DB53_length_413_mean_cov_4.3583535109**

TACTCTTTTCACCCAGGATTATATTTTAAGACGGTCTTTGTTGCTGTCAATATCG|C|GATTTTTAGGAAGATGATGATCAATTAACAA
 >chr7:155908846-155908901 - E=1e-21 >chr8:135432456-135432679 + E=
TGCCCAGTGGTACCTACAGGCCAAGACTTTGTGAATATCAGTGTTGCCTTTATGGTAAATGCACCCATCTTATTTTTCTTTCCAGGAAG
9e-123
TGCTCTTGACTTCTACTACTCCAGATTCCTATAATCTGAAATGAAATCAAAGAGTCCATCTCAATAGGATTCCCCTATTATCACACTTG

GCCTACTAAGAAGA|TG|CCCACCATGCCTGCCTAATTATAAATAACCAAAAAATATCTCAGGCACTGTCCAATACCACTTTACCTCAT
 >chr8:136010671-136010803 - E=6e-68
GTATCAATGACCTAAGATGATCATTGATAATATTTCATGAGTTCAGCTTAGCATTTATTTA
