# Supplementary material for: Chromothripsis during telomere crisis is independent of NHEJ, and consistent with a replicative origin
Source: HighWire-hosted journal article supplement (doi:10.1101/gr.240705.118), 2019-03-14
Supplement: Supplemental_file_1.zip [file contig.3.DB53_length_451_mean_cov_2.26385809313.docx]

**DB53_length_451_mean_cov_2.26385809313**

AGGACAA|GATCCAGCTTGAACCTCCAAGTCATTTCACAAGGAAATATGAAATTGCAGAACAGTGTGGGTGGGCAATGGACATGACCTG
 >chr8:75618381-75618499 + E=2e-59 p=5e-02
ACTTTCATTTATTAAATAAACACAGACTTGAGT|AGTT|TTGTCCCTTCATAAATCTCCATGAGCAACCCCCTCTAAGTCATCCCTCAT
 >chr8:75618556-75618839 + E=7e-159
AAATTTACAATCTAAGTAATCTAAGTAAAATCAAGTGTGCTTGCTCTGTAATGTAGCTTCCAGGCAAATTAATTAGCGTTCACTTCCAA

AAACCTTCTCACTCCTAAGTCCTTTCTATAGCGAAATTCAGGAGCTGCCAGTGTTAGTCCAACTCCCAAGATTATGTGCAATGTTGGTT

CTTGCACGAACCAGAGCACGAGGGGCCTCCTTGGTCTCCAGTTCTC|TTGTA|CTTCTGAGAACATTAGCAGTGGCATTGCCAAGGTAT
 >chr8:75618497-75618549 + E=1e-19
AGCACTTGGGG
