# Supplementary material for: Chromothripsis during telomere crisis is independent of NHEJ, and consistent with a replicative origin
Source: HighWire-hosted journal article supplement (doi:10.1101/gr.240705.118), 2019-03-14
Supplement: Supplemental_file_1.zip [file contig.3.DB53_length_529_mean_cov_10.561436673.docx]

**DB53_length_529_mean_cov_10.561436673**

TTTTTTACTTTTTTTTGTGTTTTTTATTTCGCATTATTTTTTTCAATTC|TTTTAATTTTATCCTTTGTGCTTTTTTT|TAATTAATCC
 >chr17:66668862-66668890 + E=3e-02
CTGAGTTCTTTGTAAATATGCTTTTTGTTTAAC|TTTTTTTTTTTGAGATGGAGTCTCACTCTGTCACCCAGGCTGGAGTGCAGTGGCG
 >chr2:173401516-173401682 + E=3e-64
TGATCTCGGCTCACTGCAAGCTCCGCCTCCTGGGTTCCCACCATTCTCCTGCCTCAGCCTCCCGAGTAGCTGGGACAACAGGAGTCCAC

CACCACGCCCGGCTAATTTTTT|T|TTATTCTCTTCTCCAACCTCTCTCACTATCCCTCAGCTTATTTCTCCTTTCAATTTCTGCACCA
 >chr8:129927277-129927520 + E=1e-84
CCCTTCAATCTCTCCGTTCTTTTAATTTCAATTCCTTTCCTTTTCTGGTAGAGAAGGAGACGCGTTTTATCTGTGGACCCAAAACTCCG

GCGCCGGTCACGGACTTAGGAAGGCAGCCTTCCCTTGGTGTTTAATCATTGCAGGGACGCTTCTCTGATTTTTCACCCATGTTTCAGAG
