# Supplementary material for: Chromothripsis during telomere crisis is independent of NHEJ, and consistent with a replicative origin
Source: HighWire-hosted journal article supplement (doi:10.1101/gr.240705.118), 2019-03-14
Supplement: Supplemental_file_1.zip [file contig.3.DB53_length_530_mean_cov_14.9924528302.docx]

**DB53_length_530_mean_cov_14.9924528302**

CCCATTTGACAATTTTTGCTGTTGTCGCTATTGCTTTTGGCATCTTGGTCATGAAATCGTCACCCATTCCTATGGCCAGGATGGTATCA
 >chr1:243114973-243115351 - E=2e-206 p=1e-03
CCTAGGTTGTCTTCGAGGGTTTTTGTAGTCTTGGATTTTACATTTAAGTCTTTAATCCATCTTGAGTTGATTTTTGTATATAGTATAAG

GAAGGGGTCAAGTTTCAATCTTCTCCATATGGCTAGCCAGTTATCCCAGCACCATTTACTGAATAGGAAATCCTTTCCCCATTGCTTGT

TCTTGTCAATTTTGTCAAAGATCAGATAGTTAAAGATGTGCAGCTAGCTTGCTTGCCTGCCTGCCTGCCTGCCTTCCTTCCTTCCTTCC

TTTCCTTTCCTTCCTTTCTTTTTCCTT|TCTTTTCCTT|TCTCTTTCTCTCTCTCTCTCTCTCTCTCTCTCTGTCTCTTTC|CTTTCTT
 >chr19:13133878-13133920 + E=1e-13 p=0e+00 >chr
TCTTTCTTTCTTTCCTTCCTTCCTTCCTTCCTTCCTTCCTTCCTTCCTTCCTTCCTTCCTTCCTTCGTTCCTTCTTTCCTTCTTTCCT18:626928-627023 - E=2e-39
