# Supplementary material for: Chromothripsis during telomere crisis is independent of NHEJ, and consistent with a replicative origin
Source: HighWire-hosted journal article supplement (doi:10.1101/gr.240705.118), 2019-03-14
Supplement: Supplemental_file_1.zip [file contig.3.DB53_length_567_mean_cov_4.90828924162.docx]

**DB53_length_567_mean_cov_4.90828924162**

AGAGC|GGCAGAACAAATTACAGGTAGATTAATTTCCCTTCATCATCAAGCCTTCACACCATCCCTGAACTGTGTCTAAACTTACATGA
 >chr8:133511219-133511411 + E=8e-95
GATAGAAGAATTAATGGACAGTCGATTCAAACCAATGCATTTGGGGCCTGTTTCTTAAAGCAGCCTGTCCTGTACCTTGCTCATATAAA

TGGTGTCTCAAGCAGAGA|TG|GGTGTGGTGGGATATGCCTTCAGCCCCAGCTACTCAGGAGGCTGAGGTAGGAAGATAGCTTGAGCCT
 >chr8:135054187-135054317 + E=1e-66
GGGAGGTTGAGGCTGCAGTTAGCTGTGATCATGTCACTGTACTATAGGCTGGGTGACAG|AG|TTTTAAATTTTGATGTAGCCCAACTT
 >chr8:133729264-133729508 -
CTCTACTTTTTTTCTTTTTTTGTGGTCTGTGCTTTTGGTGTCACATTCAATAAATCATTGCCAAATCCAATGTCATGAAGTTTCTCACC
 E=4e-135
CATCTTTTGTTGTGTTTTATAGTTTTAGCTCTTACATTTAGGTTTTTAATTCATTTTGAGTTAACCTTTGTATATGGCATAAAGTAATG

CTTCAACTTCATTCTTTTGCGTATAGTGTAGTAAGTTT
