# Supplementary material for: Chromothripsis during telomere crisis is independent of NHEJ, and consistent with a replicative origin
Source: HighWire-hosted journal article supplement (doi:10.1101/gr.240705.118), 2019-03-14
Supplement: Supplemental_file_1.zip [file contig.3.DB53_length_570_mean_cov_14.049122807.docx]

**DB53_length_570_mean_cov_14.049122807**

ATGAGGTACCT|TGGTTTTTTGTTGGTTTTTCTTTTTTT|TTTTTTTTTTTTTTTGAGATGGAGTCTCGCTCTGTTGCCCAGGCTGGAG
 >chr1:48792823-48792850 - E=1e-01 p=1e-03 >chr5:31816257-31816409 - E=9e-7
TGCAGTGGCGCGATCTCGGCTCACTGCAAGCTCCGCCTCCTGGGTTCATGCTATTCTCCTGCCTCAGCCTCCCGAGTAGCTGGGACTAC
1
AGGCGCCTGCCACC|TG|TATATATATACACATACTTGGCTTGGGACTAAAAAAACCAAGGCATTGAGAAAAGAAAAAGTAACTCATGA
 >chr12:23753477-23753855 + E=7e-216
CAATATGTCAGGCATTAGTGCAAACAGTTCACAAACAGTAAGTTCAAGGACCTGTAACTCAACAAGCAACAATATGCATGTTCTTGAAT

GCAGATTTTGAACAGACCAGATTTCTTTTTGTGTTTTCACATTTACAGAACACAACTCCAGTGTGCCGTTTTCAGAGGTTCACTGTGAG

TCCTCTAAAGGTTTCTTTATCATTTAATATTATAAATAATTATGCTCCTGGGCTGCAGTTCAAAGCTCAGTACAGCACTCGTATAACAC

CACAGGCAGGTCAGGTGACCTTTCTCCAATTCTCCTCTCT
