# Supplementary material for: Chromothripsis during telomere crisis is independent of NHEJ, and consistent with a replicative origin
Source: HighWire-hosted journal article supplement (doi:10.1101/gr.240705.118), 2019-03-14
Supplement: Supplemental_file_1.zip [file contig.3.DB53_length_834_mean_cov_20.1738609113.docx]

**DB53_length_834_mean_cov_20.1738609113**

TCCCCTTTTCTGTCTAGCTCTACTCTCTGTCACTGCATCTGCTCCTCCATCTCCCAGAGACAGCCAGTCTCTGGATTTCTCCTTTTCTC
 >chr8:81613114-81613548 + E=3e-246
CTAGGCAGTTAGAGGCTAGTACTTCTGACCTAGAACAGCTTGCTGCTGGCTACTGCTTCCCTCCCGCCAGGTCCACTGGTGGCTCAGCG

GGGTTCTCCCTTTACCAGCATCCCTGAATCCCTGGCCTTGCTAGCCTTCTGCTCCACTGGCCCAGAAGAACCAAACCCTGGCTGAATCC

TCCTGTGCTGCTCTTTACTGTCCACCTCAGGGCAGTCAGTGCTGATGGGAAACAGCGAATGACTCTGCTGGCCGGGCCCATCCTCGGCA

CGCATCCTACCTGCACTTGGCCTCAGCAGGCCCTTCACCCGCCCTCGCTCACCACAACTGCCCGCTTCTAGCCAGGAT|CC|TTCCCCC
 >chr8:
ATGTATGTTCTTGGAGGCTTGTTGAAGATCAGTTTCCTGTAGATGTGTGAACTTATGTCTGGGCTCTCTCTTCTGTCACATTGGTCTGT
77853915-77854202 + E=9e-158
TTGTGTGTTTCTATGCCAGTACCATGCTGTTTAAGTTAACATAAGCTCTGTAGTGTATTTTGAGGTCAGGTAATGTAATGCCTCCAGAT

TTTGTTTGTTTGTTTGTTTACTTAGGATTTCTTTGGCTATTCGGGGTCTTTTGTGGTGTCATACAAATTTTAGGATTGTTTTCCTATTT

CTGTGAAGAATGC|T|ACCCAGGCTGCGGTGCGGTGGCGCTCTCTCGGCTCACTGAAACCTCTGCTTCCCGGGTTCCAGTGATTCTTCT
 >chrUn_gl000220:130249-130359 + E=3e-39
TTGGTAGCTGGGAGTCCAGGTGCGGACCATGCCGGCC
