# Supplementary material for: Chromothripsis during telomere crisis is independent of NHEJ, and consistent with a replicative origin
Source: HighWire-hosted journal article supplement (doi:10.1101/gr.240705.118), 2019-03-14
Supplement: Supplemental_file_1.zip [file contig.3.DB53_length_863_mean_cov_10.0787949015.docx]

**DB53_length_863_mean_cov_10.0787949015**

GGAAAAAACCAGAAGTGCTTTCTCCTCTCACATTCCACTCAACACTTCTCTCACCAAATGTGTGTGGGGATTTCTCTCCACCAACAACC
 >chr8:135808539-135808766 - E=1e-124
AGCAGTTCTTTACTGCAGATTCTCCAGTGGATACCAGCCAGGTGTCCTCTAATTCAGTTCAATTCTGACATTATCTACTGGGAGATAGT

GTCAGATCCCGCAAGTGGAGGGCTCAGTCCTACAAGACTACCCCTTA|CT|CACATGAGCTTGGAAGCAAAATAAATTGAAATAGCACT
 >chr8:135807092-135807412 + E=1e-180
TACTAAACAACTTTGTTGCTAGCACTGTGCAGGGTCCTTCACATAGTTCTCTTATCTAGTCCTCCTAACAACCTGATAGCCACCATTTT

TTTATTTTAATTTTTTTAACAGAGAACTATCCAGAAAAGATGAACAACTTGTTCAAGGTCACAAAAATGGCAAGTGAGGGAGCCTAGAT

TAGATCAGAGGTCTAATTCCCAAGGGTATGTTTGTGATATTGTGAAATATATATTTGCTCTTCATCTCCATTTCCTAAAGCCCTTGGAA

TCTCTGAAATTGT|CCT|TCTTTAAAAAAATTAAACTGAGGACAGGAAGGTAAATTAAAGGGGAGATTTGGAGACTTGTGGTAACTGGT
 >chr8:135818570-135818885 - E=1e-177
TTATTGCAACTTAATGTGCAGCATCCTCATTAGTCAAGTATCATGTGCCTACCTAGGCATGAAATAGCTATTTTTTTCCTGATTTAAAT

CTGGAAAGTTTCAGTTGTAGTACAGTTTGAATAGTTGTTGTTGTAAATAGCCACTGGACTTTTTAAAAAAGTATTTTTCTTCAAAAACA

GTGAAGGTCATCTTGTATCCATAGAGACCACATGTACTTTCCTCATTATTTCCAGCATTATTTATA
