# Supplementary material for: Chromothripsis during telomere crisis is independent of NHEJ, and consistent with a replicative origin
Source: HighWire-hosted journal article supplement (doi:10.1101/gr.240705.118), 2019-03-14
Supplement: Supplemental_file_1.zip [file contig.3.DB54_length_269_mean_cov_2.82527881041.docx]

**DB54_length_269_mean_cov_2.82527881041**

ATTTTATCAACGTAACTTGACATATGTTTTACAAGTCCATAATC|TCAGAGACTTATTTTTTTTTTTTTTTTTTTTTGA|G|GCTGGAG
 >chr17:65752850-65752885 + E=1e-03 >chr6:
TGCCATGGCACAATCTTGGCTCACTGCAGCCTTGACCTCCTGGACTC|GAG|ATCCTCCCACCTCAGCCTCTCAAGGAGCTGAGACCAC
21232281-21232336 + E=9e-16 >chr14:20671322-20671399 + E=5e-26
AGGCACATGCCACCATGCCTGGCTAATTTTTTTTTTTTTT|CAGGGTGCGGGTCTTGCCATGTTTGCCAGGCTATTGGGTTGAAGGGGT

ACTCTCGA
