# Supplementary material for: Chromothripsis during telomere crisis is independent of NHEJ, and consistent with a replicative origin
Source: HighWire-hosted journal article supplement (doi:10.1101/gr.240705.118), 2019-03-14
Supplement: Supplemental_file_1.zip [file contig.3.DB54_length_642_mean_cov_5.90342679128.docx]

**DB54_length_642_mean_cov_5.90342679128**

GAAGGTTAAAAAGCACAGAAAAAAAGCAATGGCAAC|CCAGCCAAAAAAAAAAAAAAAAAAAAAA|T|AAAAAAAAAAAAAAAAAAATT
 >chr12:122300608-122300636 - E=4e-02 p=0e+00 >ch
CCATATTTTCCAAGGTAAGCAATATAAATGGGGCTCAGGAATACCCCATTAGATTAAAAAAAATCTCCTAGAGAGAGAACCCTTGAGCC
r4:13384190-13384336 - E=4e-76 p=1e-03
TACAAACTAAAGACTTTCAATATAATTTTAAAT|AAA|ACATACATGTGGCCAACAAACATGAAAAAATGCTTCAGCATTACTAATCAC
 >chr4:13286789-13287223 - E=2e-246
TGGGAAAGGCAAATTGAAACCACAATGAGATACCATCTCACAACAGTCAGAATGGCTGTTATTAAAAAGACAAAAAAATAACAGTGGCA

AAGTTGCAAAGAAAAGGGAACAGTTACCTACTGCTGGTGAGAATGTAAGTTAGTTTAACTACTGTGGAAAGCAGTTTGGAGATTTCTCA

AAGAATTTAAAACAGAACTACCATTTGATCCAACCATCCATCCCATTGCTGAGTATATATCCATGGAAATATAAATTGTTCTACTATAA

AGACACATGCAAATTTATATTCATCACAGCAGTATTCACAATAGCAAAGATATGGAATCAACCCAGCTGCCTATCAATAGTGCATTGGA

TAAAAAAAAATGTGGTACATATAT
