# Supplementary material for: Chromothripsis during telomere crisis is independent of NHEJ, and consistent with a replicative origin
Source: HighWire-hosted journal article supplement (doi:10.1101/gr.240705.118), 2019-03-14
Supplement: Supplemental_file_1.zip [file contig.3.DB54_length_874_mean_cov_9.52173913043.docx]

**DB54_length_874_mean_cov_9.52173913043**

CCAAAATTAAGGTATATGCACATGAAAGGAACTTGCTTATAAGGCATTATCAAGTGCATATGTGTTACCACCACGATTTGTTTTTATCA
 >chr1:193315902-193316354 + E=5e-254
TGATGTTCATAACTATCTGGCATATATGTGTTTATTTGTTTGCTTGTTATTTGTGTCCTCCCTTTGGATGGTAACTTTTATAAGGAAAA

ATATGCATCTTATGAATCTATATTCCATCAGTTAGAGCAGTGTCAGGTACACAGTGGCTGTTAGATGTTGGCTAAACAAATGGATAAAT

GAGTCATCTTAGGCAGATATTTTTCTGCAGTGAAATTGTGCCCTGTCTTGACTTTGCAGAAATTTCTCACCACTGTTTGGAGATATACA

CCTGTATGTCCAACTGCCTGCTTGACTTTTCCACTTGAATGTCTAGCAGGAATCTCACATGTCCACAATATTCCTCCTTATTTTTCAAA

CCAAG|TC|AATTTCATTCTCTGTGACTAGTAGTATCAAGTTATCTCTATCCCTGAGAGAGAGACAAAGGTCAGTGCTAAAATAGTTGA
 >chr1:193315256-193315476 - E=2e-120
GTCTGTGAGTGAGAGAAGTCATAAAAGGTCTCAAATCAACCTTGCCAGCTGTTTTTCCAAAGTCAAAGAAGAAAGTGAGAGGAAAACCA

ATAATCTGGAAGTTGATACAAATCTGATCCTAACATTTCATCTACCTCA|TGT|CTGTAATTCCAGCACTTTGGGAGGCCAAGGCGGGC
 >chr8:71476524-71476719 - E=2e-78
AGATCACGGGGTCAGGAGATCGAGACCATCCTGGCTAACACAGTGAAACCCCATCTCTACTAAAAATACAAAAAATTAGCCGGGCGTGG

TGGCAGGCGCCTGTAATCCCAGCTACTCGGGAGGCTGAGGCAGGAGAATTGCTTGAACCCAGGAGACAGAG|GATGCA
