# Supplementary material for: Chromothripsis during telomere crisis is independent of NHEJ, and consistent with a replicative origin
Source: HighWire-hosted journal article supplement (doi:10.1101/gr.240705.118), 2019-03-14
Supplement: Supplemental_file_1.zip [file contig.3.DB55_length_405_mean_cov_6.12098765432.docx]

**DB55_length_405_mean_cov_6.12098765432**

AAAGAAGAAGAAGAACTTAAAAAAAATCCTTTAATATCCATTAGTTAAAATTTTAAAAGGCTAGAGTGGT|AGGCGCAGTGGCT|TATG
 >chr1:44650555-44650638 - E=2e-35 p=0e+00 >chr7:144830738-
CCTGTAACCCCAGCGTTTTGGGAGGCCGAGGCGGGCGGATCACTTGAGATCAGGAGTTCAAGACCAGCCTGGCCAACATGCTGAAACCC
144830879 - E=2e-73 p=4e-02
CATCTCTACTAAAAATACAAAAAAATTAACTGGGT|ATTAA|CTGGAACTAAGGTTCTGGCTTTTGAATTCATTGGTATTTTGAGAGCA
 >chr7:144373988-144374177 - E=3e-93
ATATGTACCATGAATATCAGTGCTAAATGTGAGGTTTTTTTTTTATTTGTGATTTTGTGGTACTTAGAGATTCTCAGGCTTATTAGCAT

AACAGTCTAAGAAGTTGCTATATCTTTAATATTGTGTGTAGGATATCTGAAAT
