# Supplementary material for: Chromothripsis during telomere crisis is independent of NHEJ, and consistent with a replicative origin
Source: HighWire-hosted journal article supplement (doi:10.1101/gr.240705.118), 2019-03-14
Supplement: Supplemental_file_1.zip [file contig.3.DB55_length_594_mean_cov_6.44107744108.docx]

**DB55_length_594_mean_cov_6.44107744108**

TTTTTTTTTCTTTCTTTCTTTCTTTCTTTCTTTCTTTCTTTCTTTCTTTCTTTCTTTCTTTCTTTCTTTCTTTCTTT|TTTTGAGACGG
 >chrX:105730289-105730366 + E=1e-31 >chr12:13
AGTCTCACTCTGTCGCCCAGGCTGGAGTGCATTGGTGTG|GATTCCGGTGATCGCAGTATCCGTAACAAGAGAACATGCC|ATTCTCCT
2884373-132884423 - E=2e-18 p=6e-03 >chr7:5
GAATCAGCCTCCTGAGTAGCTGGGACTACAGGCACCCGCCACCACGCCAGGCTAATTTTTTGTATATTTACTAGAGACGGGGTTTCATC
3868791-53869219 - E=2e-163
ATGTTGGCCAGGATGGTCTCAATCTCTTGACCTCGTGATCCACCCACCTCGGCCTCCCAAAGTGCTGGGATTACAGGCATGAGCCACCG

TGCCCAGCCAGTAGTATTTTTATAACAAAACATTTGATATTTTTTATACTTATTAGGGCTTAGGTCAGATCTACATACTCTGAAAGTCG

GTCAAAGGAAGTTCATTCACATGTGAAAATAAAAGGCACAGGTCTGTCCCAATGTGGTCATGCTGCTTTAACAAAATACCATAGACTGG

GTAACTTAGAAACAACAGGAATTTGTTTCTCACAGTTTAGGAGGTTGGGAAATCCAAGGTTAA
