# Supplementary material for: Chromothripsis during telomere crisis is independent of NHEJ, and consistent with a replicative origin
Source: HighWire-hosted journal article supplement (doi:10.1101/gr.240705.118), 2019-03-14
Supplement: Supplemental_file_1.zip [file contig.3.DB56_length_377_mean_cov_12.5862068966.docx]

**DB56_length_377_mean_cov_12.5862068966**

CACCACCATCACCACCACCACCACCACCACCATCATCATCACCATCACCACTACCAT|T|TTTTGAGAGACAAAAAGCTGTATTTCCTG
 >chr10:35956413-35956470 + E=9e-11 >chr2:3208495-3208716 + E=1e
CCATCAAGAGCCACAGAGCTGACAAGGGTGGCTTGATTTGGAGGACAGGAAAACTACAGAGAACACAGCACTGCGCTCACAGCAGACCC
-121
TACTACATGCAGGCGCACTCCCAGCAGACCCTACTACGTGTAGGCCGTGCTCACAGCAGACCCTACTACATGTAGGACTGTGCTCCCAG

CAGACCCTACTA|CT|CTTCCACCCTCTTATGTATAGATCCATACCAAATTGTTTAAATGCCCTGACTCTTCATCTGTAAAATAGGGCA
 >chr2:3129985-3130085 + E=1e-48
ATGACCGCCCACACTGCTCCTGCTG
