# Supplementary material for: Chromothripsis during telomere crisis is independent of NHEJ, and consistent with a replicative origin
Source: HighWire-hosted journal article supplement (doi:10.1101/gr.240705.118), 2019-03-14
Supplement: Supplemental_file_1.zip [file contig.3.DB56_length_468_mean_cov_9.17521367521.docx]

**DB56_length_468_mean_cov_9.17521367521**

GGAACTAGAATTCAAGATGAGATTTGGGTGGGGACAAAGTCAAACCATATCTTTACATATGTGTCTATGTGTGTGTCCAGTTTTTACTA
 >chr13:92233397-92233617 + E=7e-121 p=0e+00
TGTAGTATATACTATATTCTGTGTACTCTAAAAAGTGTAGAGACTTTTAGAGAAAATAAAAAGTAGATAGGAAAGTAGAGTGGAAGAAA

TATAACACTATTTTGGCCCCATCATGGTCAGCTTTTGTAAAG|CTGTTTGTATATATATAT|AGAGAGAGAGAGAGAGAGAGAGGGAGA
 >chr13:92238823-92239004 +
GGAAGTGCTACATTTTTAAACCATCAGATCTCATGAGAACTCACTATCATGAGAACATCATGGGGGGACTGCCCCCATGATCCAATCAC
 E=2e-97 p=0e+00
CCCCCAGCAGGTCCCTTTCTTGATATGTGGGGATTAT|**AATTCAAGATGAGATTTGGGTGGGGACA**|AAGTCAAACCATATCTTTACAT
 >chr13:92233405-92233482 + E=9e-35
ATGTGTCTATGTGTGTGTCCAGTTTTT
