# Supplementary material for: Chromothripsis during telomere crisis is independent of NHEJ, and consistent with a replicative origin
Source: HighWire-hosted journal article supplement (doi:10.1101/gr.240705.118), 2019-03-14
Supplement: Supplemental_file_1.zip [file contig.3.DB56_length_853_mean_cov_8.98710433763.docx]

**DB56_length_853_mean_cov_8.98710433763**

GGCGGGGTGG|GGGGGGGGGGGGGCGGGGGGGGGGGGGGGCCTGGGGGGGGGGGGGGGG|CCCCCGGGGCCCGGGGGGGG|GGGTGGGG
 >chr2:33141624-33141670 + E=6e-02 p=0e+00 >chr14:
CTCGGGGGCAGGGCTGTGGCCTCGCTCACCCCTGTGCTGTGCCTTGCCTACAGGTGAAGTGGATCTTCTCCTCGGTGGTGGACCTGAAG
106203910-106204243 - E=2e-185
CAGACCATCATCCCCGACTACAGGAACATGATCGGACAGGGGGCCTAGGGCCACCCTCTGCGGGGTGTCCAGGGCCGCCCAGACCCCAC

ACACCAGCCATGGGCCATGCTCAGCCACCACCCAGGCCACACCTGCCCCCGACCTCACCGCCCTCAACCCCATGGCTCTCTGGCCTCGC

AGTTGCCCTCTGACCCTGACACACCTGACACGCCCCCCTTCCAGACCCTGTGCATAGC|T|AGAAGGAGCCTGGAAGGGCTAGAGAACA
 >chr7:149197424-149197865 +
TGAGACCACATGTCAACTCAAGGTGTCAGGGAGGCAGGAAGTGTGTGGTTCATACTGCACGTAGACTGTGTAGATGTAGGGACTATGGA
 E=2e-250
CCCATGCACCCCTATGAGTGCTTCCTATACTCCAGCAGGTACAGCAGAACAGGTGGACCTCTATTTTTCCAGCTGCTCCCTTAGGCCTG

AGCTTTTCCCCTGGGACCAGGCACACAGCCTAAAAGTTCAGGCTTGGGGTTTTCAAAAAGACTGTGGTAATCATTGCTGCCCACTAAAT

ATTTCCAGCTGGTTTCTCTTGAAGACCATGGCTGGATGGCACTTCCTGGTTTCTTCTGGCTGGGTTGGACCATGTGACAAGTTCTGGCT

GATGTTTTTTCTTTCCCTCTACTATGGTAACCCAGCAATATTTGAGGAGGTGGGTGC
