# Supplementary material for: Chromothripsis during telomere crisis is independent of NHEJ, and consistent with a replicative origin
Source: HighWire-hosted journal article supplement (doi:10.1101/gr.240705.118), 2019-03-14
Supplement: Supplemental_file_1.zip [file contig.3.DB57_length_363_mean_cov_17.6005509642.docx]

**DB57_length_363_mean_cov_17.6005509642**

CCACTGGCCTGCGCCCACTGCCTCGCGCTCCCTAGTAAGCGGCACCCAGTACCTCAGGTGGAAATGCAGAAATCACCCGTCTTCTGTGT
 >chr10:18325454-18325702 + E=8e-108
CGCTCACGCTGGGAGCTGTAGACTGGAGCTGTTCCTATTCGGCCATCTTGGCTCCTCCCCCGTGATATCTTTTACAACAAAGGCAGCCT

AATAACTATATCATTGGCATCTTGCAGTTAGCATTTTAAAAATTATATATATATATATATATATATATA|T|TTTTTTTTTTTTTTTTT
 >chr20:56824786-5
TTTTTTTTTTTTTTTTTTTTTTTTTTTTTTTTTG|T|TTTTTTTTTTTTTTTTTTTGTTTTTTTTTTCTTTTTTTTTTTTTTTTTTTTT
6824839 - E=2e-20 p=0e+00 >chr2:33091781-33091845 + E=5e-18
TTTTTTCTTTT
