# Supplementary material for: Chromothripsis during telomere crisis is independent of NHEJ, and consistent with a replicative origin
Source: HighWire-hosted journal article supplement (doi:10.1101/gr.240705.118), 2019-03-14
Supplement: Supplemental_file_1.zip [file contig.3.DB57_length_395_mean_cov_4.73164556962.docx]

**DB57_length_395_mean_cov_4.73164556962**

TAATTTTTTC|ATATTTTTTAATGTGGATTTTTTAATT|TTACTTTTTTTTGCTC|CAAAGTAGGTGTGTATTTTTGTGGGCTATATGA
 >chr7:89837203-89837230 - E=1e-01 p=0e+00 >chr10:105913085-105913300 - E=6
GATGTTTTGATACAGGCATGCAATGTGAAATAATCACAACATGGAGAATGGGATATTCATCCTCACAAGCATTTATCCTTTGGGTTATA
e-109
AACAATACAGTTACACTCTTCTAGTTATTTTTTAATGTACAGTTAAGTGATTGTTGACTATAGTCACCCTGTTGTGCAATGAAAATTTT

ACC|T|TAACTTGGATCACTTGGTTAAGTAGTGTCTGCCACTTTCTCTATTGTAAAGTTAGTTTTTCCATTTGTAATTTATTAATTTGT
 >chr10:105913814-105913942 + E=1e-65
GGAAAGATACTTTGAGACTATGTAAATATCTTGTTTCTCATCAC
