# Supplementary material for: Chromothripsis during telomere crisis is independent of NHEJ, and consistent with a replicative origin
Source: HighWire-hosted journal article supplement (doi:10.1101/gr.240705.118), 2019-03-14
Supplement: Supplemental_file_1.zip [file contig.3.DB57_length_452_mean_cov_7.16150442478.docx]

**DB57_length_452_mean_cov_7.16150442478**

GCAAAAATATCAAAAATTAGCTGGGCATGGTGGCG|GG|CGCCTGTAGTCCCAGCTACTCGGGAGGCTGAGGCAGGAGAATCGCTTGAA
 >chr7:129305600-129305635 - E=2e-03 p=0e+00 >chr17:65271186-65271481 - E=7e-121 p=2e-
CCTGGGAGGCGGAGGTTGCAGTGAGCCGAGGTGCACCACTGCACTCCACCCTGGGCAACAGAGCAAGACCCTGTCTCAAATAAATACAT
02
AAATAAAATAAAATAAGTCTGGGCGTGGTGGCTGATGTCTGTAATCCCAGCACTTTGGGAGGCCAAGGCGGGCAGATCACCTGATATCA

GGAGTTCAAGACCAGCCTGACCAACATGGTAAAACCCCGTCTCTACTAAAAATACAAAAATTAGCTG|TATTCTAATT|ACAAGGTATA
 >chr17:67
AGTGTTCGTATTTCTCTGCAGCCTCACCAGCATCTATTGTTTTTTGACTTTTTAATAACGGCCATTCTGACGATTATGAGATGATATCT
769375-67769485 - E=1e-51
CATTGTGGTTT
