# Supplementary material for: Chromothripsis during telomere crisis is independent of NHEJ, and consistent with a replicative origin
Source: HighWire-hosted journal article supplement (doi:10.1101/gr.240705.118), 2019-03-14
Supplement: Supplemental_file_1.zip [file contig.3.DB57_length_904_mean_cov_7.97123893805.docx]

**DB57_length_904_mean_cov_7.97123893805**

ACAAGAAAATATATGCAATCTAAACACCTAACAAAAGAA|TAATAACCAGAACCTAAAACGAACACAAATAACTTTACCAGAAAAAAAC
 >chr6:99657418-99657790 + E=4e-80
AAATAACCAAAAAAAAAAGTAGGCAAAGGATATGAACAGACACTTCTCAAAAGAAGACATTTATGGGGCCAACAAACATGAAAAAAAGC

TCATTATTACTGGTCATTAGAGAAATGCAAATCAAAACCACAATGAGATACCATCTCATGACAGTTAGAATGGCAATCATTAAAAAGTC

AGGAAACAACAGATGCTGGAGAGGATGTGGAGAATTAGGAACACTTTTCACTGTTGGTAGGAGTGTAAATTAGTTCAACCATTGTGGAA

GACAGTGTGACAATTCCTCAAGGATCTAGAACCAGAAATACCATTTGGCCCAGC|AAATGGTATTTTGCTGGAATATTT|GCATATACT
 >chr4:14
GGGTATATATCCAAA|GGA|GAGTTCTACTGCAGAGTCCTGATGATTTAGATGTACCAATGTTTGAATCCTGTCTCAAAATAGAAAGAG
5166505-145166532 - E=2e-01 >chr8:24462583-24463030 + E=6e-254
AAAACCAGGCATGGTACAATTTATGTGTCAATGGTAGTGATGCTATTCCTACATCTAACACCAACTGTGTAAAATATTGACGTCGCATA

CAGATGTTTCACCTTGTGGTCTCAAAACTCTTTCTAGCTGATAAGTTTAGCAAAATAAATATGTTATCTTCCCTAGATTATGACAGGGC

ACCCAAAACTAAACTACCCTCTCTGGTGATTAAAGGGTTTGAGAAAATAGCATGCTGGTCTTTCTTTTTCAGCAGACAAGGGCAATCAT

ATTAAAAAAATTAAAAATTCCACAAAATTTATTTAGTTTGTATATTTTTTACTTTCAGAAAACAAATGGCAGAAAGGAGGTGCCCCACC

TGACATTACTGAGGTGTTA
