# Supplementary material for: Chromothripsis during telomere crisis is independent of NHEJ, and consistent with a replicative origin
Source: HighWire-hosted journal article supplement (doi:10.1101/gr.240705.118), 2019-03-14
Supplement: Supplemental_file_1.zip [file contig.3.DB57_length_1264_mean_cov_19.8291139241.docx]

**DB57_length_1264_mean_cov_19.8291139241**

AGGCAGGAGAATCACTTGAACCCGGGAGGCAGAGGTTGCAGTGAGCCGATTGTGCCACTGCACTCCAGCATGGGGGACAGAGTGAGACT
 >chr11:47161126-47161749 + E=0e+00
GAACGTCAAAAAAAAAAGGGAGCATGAAAGTGATGAACCCCAGTTGAGGGAAGGGTACTGTTACTGCTCACTTCACTGAAGTGGGAACT

GAGGCTCAGACGGGTGACAATGTTGTGCGAATATACTGATAGCTTGTAAGTAGCAGTGGCAGAACTGGAACCGCAGTCAGCCTGAATCC

AGAGATGGGGGATCGGGAGCACAAGGAGTCTCTTCATGCTCCCACCTCCCTGTGTCATGGCATCATTTCTGCTTTGTGGTTTGACCCAC

TGAAAACAAAGCTGCATTGGCTGCACTGCACCAAGAATCACCTCGCTCCTTTTGAAATGTGCCAACCAGCTCCTCTATTGACTTGGAAG

ATGGGAACTCCATTGCTCCCAGTGACAGACACCAGCCTCACGGTGGGGCACGGTGTTTTGCAGCTAACAGCTCATGACCTACTTTTGCT

GGTCATGTGCAAAACCTGTTTAGTGATCACACATGCAAAATTTTGTAGGTTTTTTTCTCCCTCATTATTCAGTGGATAATT|TTC|AAG
 >chr1
TGATTCTCCTGCCTTAGCCTCCTGAGTAGCTGGGATTATAGATGTGCACCACCATGCCCAGCTAAGTTTTGTATTTTTAGTAGAGACAG
1:47162971-47163405 - E=3e-239 p=0e+00
GTTTCACCATGTTGGCCAGGCTGGGTTTGAACTCCTGACCTCAAATGATCCTCCTGCTTCAGCCTTCCAAAGTGCTGGGATTACAGGCG

TGAGCCACTATGCCTGGCCAAGACCACATATACAATTCTACTTATTTGATTTTTTTTTAAAGACAGAGTCTCACTCAGTTGCCCAGGCT

GGAGTGCAGTGGCACAATCTCAGCTTACTACAACCTCTGCCCCCCAGGCTCAAGCAATTCTCCCACCTCAGCCTCCCAAGTAATTGGGA

CCACAGACGCACACCACCACGCCTGGCTAAG|TTTTTGTATTTTTGTTAGAGATGGGGTTTCACCATG|ATAGCCAGGATGGTCTCCAT
 >chr11:47162256-47162500 - E=1e-128
CTCCTGACCTCGTGATCCGCCTGCCTTGGCCTCCCAAAGTGCTGGGATTACAGGCGTGAGCCACCGTGCCCGGCCTTAAGTTCGGTCTT

TAAGGATGCTGAGTTTATCTCCCCAGATTTTGGGGCTGAATATTCCTTAAAACAATCTGGGCCCAGGCTGGCTGTGGTGGCTCATGCCT

GTAATCCCAG|CACTTTGGGAGG
