# Supplementary material for: Chromothripsis during telomere crisis is independent of NHEJ, and consistent with a replicative origin
Source: HighWire-hosted journal article supplement (doi:10.1101/gr.240705.118), 2019-03-14
Supplement: Supplemental_file_1.zip [file contig.3.DB68_length_560_mean_cov_7.91607142857.docx]

**DB68_length_560_mean_cov_7.91607142857**

AATCAGGGAAATGCAAATCAAACTACAATGAAATACTACTTCATTTAGAATGGCTATTAACAACAAGATAACTGTTAGCGAGGATGTGG
 >chr3:189575552-189575912 + E=5e-205
AGAGAAGAGAACCTTTACATACTTTCAGTGGGAATGTAAATTAGTACAGCCATTATGGAAAATAGTATAGAAGTTCCTTGAAAAATTAA

AAATATAACTACCATGTGATCCAGCAATCTCACTACTAGGCATTTATCCAAAGGGAATAAAATCAGTATGTCAGAGGGATATCTTCACT

CCTGTTTATTGCAGCACTATTTGCAATAGCCAAGATATGCAATCAACCTAAGTGTCCATCAAAGGATAAATGGATAAGAAAATGTTGTG

TATA|TGCACAGT|AGAATACTATTCAGTCAGAAAAACATAATGAAATCCTG|AGGTTGGGCAT|AGTGGCTCATGCCTGTAATCCCAG
 >chr3:50803521-50803559 - E=4e-02 >chr17:46563381-4656352
TACTTTGGGAGGCTGAGGCAGGAGGATCACCTTAGGTCAAGAGTTCGAGGCCTGGCCAACATGGCGAAACCCTGTCTCTACCAAAAATA
4 + E=2e-65
CAAAAATTAGCTGGGCATGGTGGTAGGCAC
