# Supplementary material for: Chromothripsis during telomere crisis is independent of NHEJ, and consistent with a replicative origin
Source: HighWire-hosted journal article supplement (doi:10.1101/gr.240705.118), 2019-03-14
Supplement: Supplemental_file_1.zip [file contig.3.DB71_length_575_mean_cov_4.95130434783.docx]

**DB71_length_575_mean_cov_4.95130434783**

AGGATACAAACAAATGGAAGAACATTCCATGCTCATGGGTAGGAAGAATCAATATCGTGAAAATGGCCTTAATGCCCAAGGTAATTTAT
 >chrX:57174563-57174858 - E=8e-154
AGATTCAATGCCATCCCCATCAAGCTACCAATGACTTTCTTCATAGAATTGGAAAAAACTACTTTAAAGTTCATATGGAACCAAAAAGG

AGCCTGCATCACCAAGTTAAACCTAAGCCAAAAAAACAAAGCCGGAGGCATCATGCTACCTGACTTCAAACTATACTACAAGGCTACAG

TAACCAAAACAGCATGGTACTGGTACC|A|TATATATATATATGATCATATATATAT|G|ATCACCAATGATCAGGGAAATGTTAATCA
 >chr12:65500126-65500154 - E=4e-05 p=8e-03 >chrX:571714
AAACCACAATGTAATACCACCTTACCCCCCCCAAAAGAATGATCATAATCAAAAAACAAAAACTAATAGATGCTGGTATGGATGTGGTG
95-57171748 - E=9e-136
AAAAGGGAACACTTCTACACTGCTGGTGGGAATGTAAACTAGTACAACCACTAGAAAAAACAGTGTGGAGATTCCTTAGGGAACTAAAA

GTAGAACTAACATTTGATCCAGCAATCCCACTACCCACAGAAAAA
