# Supplementary material for: Chromothripsis during telomere crisis is independent of NHEJ, and consistent with a replicative origin
Source: HighWire-hosted journal article supplement (doi:10.1101/gr.240705.118), 2019-03-14
Supplement: Supplemental_file_1.zip [file contig.3.DB73_length_365_mean_cov_10.2356164384.docx]

**DB73_length_365_mean_cov_10.2356164384**

TAGTTGCTATACTAGTTTACATTACTTTCTTTCTTTTCTTTCTCTTTCTTTCTTTTCTTTCTCTTTCTCTTTCTTTCCTTCCTTCCTTC
 >chr6:131803171-131803352 + E=5e-65 p=2e-02
CTTCCTTCCTTCCTTCCTTCCTTCCTTCTTTCTTTCTTTCTTTCTTTCTTTTCTTTCTTTCTTTCTTCCTTTTCTTCTTTCTTTCTTT|

TCTTTATTTCTTG|ACAGAGTCTTGCTCTGTTGCCCAGGCTGGAGTGCAATGGTGTGATCTCGGCTCACTACAACCTCCACCTTCCAGG
 >chr3:196409514-196409645 + E=2e-52
TTCAAGCGATTCTCCTGCCTCAGCCTCCCGAGTAGCTGGGATTACAGGTGAACACC|GCCACGTCTCACTG|ATTTTTTGTACTTTTAG
 >chr2:100028516-
TAGAGATGTGGTT100028546 - E
