# Supplementary material for: Chromothripsis during telomere crisis is independent of NHEJ, and consistent with a replicative origin
Source: HighWire-hosted journal article supplement (doi:10.1101/gr.240705.118), 2019-03-14
Supplement: Supplemental_file_1.zip [file contig.3.DB73_length_440_mean_cov_6.69545454545.docx]

**DB73_length_440_mean_cov_6.69545454545**

AGAAAAGACCCACTAAAGATCAAAAATTGGTGAGTATCTATAATAGACTTTTGTTCATTACTTAACCTTTTCTTTTACATTGACCCCCT
 >chr2:222981429-222981584 - E=1e-78 p=0e+00
CATCACCATTTGGGAAAAATCTTTCCCTATGGAGATATAG|ATATCTATATCTATATTTATATCTAT|CTATCTATCTATCTATCTATC
 >chr2:222981161-222981419 - E=6e-124 p=0e+00
TATCTATCTATCTATCATCTATCTATCTATCTGTATCCTTGTTTTTTGTGTGTTTGTTTTTTCAATTGTCTAAGTTGGGTCTTCTGGCC

TTTTGATGATTTTGCATCTTTGATTTCCTTCCTTCCTTCCTTCCTTCCTTCCTTCCTTCCTTTCTTTTCTTTTCTTTTCTTTCTTTCTT

TCTTTCTTTCTTTCTTTCTTTCTTTCTC|TTTCTTT|TTCTTTCTTTTTTTCTTTCTTTTTTTTTTTCTTTTTTTTTTTTTTTTTTTT >chr10:89379325-89379383 - E=2e-17
