# Supplementary material for: Chromothripsis during telomere crisis is independent of NHEJ, and consistent with a replicative origin
Source: HighWire-hosted journal article supplement (doi:10.1101/gr.240705.118), 2019-03-14
Supplement: Supplemental_file_1.zip [file contig.3.DB73_length_497_mean_cov_22.6720321932.docx]

**DB73_length_497_mean_cov_22.6720321932**

AA|TCTTAAACTTGTTCACACTTGTTTTTGTGTCCTATATGGTCTATGCTGGATCATGTTCCATGTGCACTAGAGAAGA|ATG|AGGCT
 >chr3:81208029-81208107 - E=4e-31 >chr3:7
TATTTGTATCTAATTTGTAACTACTCCAATTAATGTTTTTCTTAGTGAAATATATTAATGAATAATGAAAGATCTATTATTTGCTCATG
8990187-78990496 + E=2e-174 p=0e+00
TCCACCATGAAACAAAAATTATAATTTGAAATGCCAATAGTTGTATAATCTGAAACACTAATAACTTTAGCTTAGTGCACGTATACAGC

ATGGTATAGATTTTTTCAATGAAACTAAGCTCTAGAAAAGGAGGAAATAAACTAGCAATATAAAAGAAAAAAATTACTTGGAAACTTAT

ACTCTCTAAGGCTATGTTGAAGCCAAGTGAAATT|AACAAAGATATTCAGG|ATGTTAGACAGATCATTGAGACAGAAAATTAACAAAG
 >chr3:80297845-80297918 + E=3e-32
ATATTCAGGACTTGAACTCAGCTCTGGACCAAGTGG|CTTGATGTTGTCCTTATAGCT
