# Supplementary material for: Chromothripsis during telomere crisis is independent of NHEJ, and consistent with a replicative origin
Source: HighWire-hosted journal article supplement (doi:10.1101/gr.240705.118), 2019-03-14
Supplement: Supplemental_file_1.zip [file contig.3.DB73_length_523_mean_cov_11.4971319312.docx]

**DB73_length_523_mean_cov_11.4971319312**

CCAGAGAGGCTGAGGCAGGAGAATCGCTTGAACCCGGGAGGCAGAGGTTGTGGTGAGCTAAGATTGAGCCATTGCATTCTAGCCTGGGC
 >chr3:52760853-52761118 - E=5e-137 p=2e-03
AACAAGAGTGAAACTCTGTCTCAGGAAAAAAAAAAAAAAGTTTTAGATGCCTGTTAGATCTAGTTGGTTTACTGCATTGTTCAAGTCCT

CTTATTTATTTATTTGAGACGGAGTCTCGCTCTGTCACCCAGGCTGGAGTGCAATGGCGCCATCTCAGCTCACTGCAACCT|GAGTGCC

A|GCACTGCAACCTCCGCCTCCCAGGTA|CA|AGCAGTCTGGTCTTTCAGCCTTCGGACTGATTTGGCTTGAAGGTGGGGTTTCACTGG
 >chr19:3999586-3999612 - E=5e-04 >chr3:52755759-52755987 - E=1e-125
GAACCTGCCCCATCTGCCTAGGTATTTGGCCACCTCCTGTCACTATCACCAGGGATTAGTCACAGGTATAAACTTAAGGTCCTTCTCAT

GTCTGAATCTGTGTTTTCCCCTGGGCATGTACATGCATGGTAACTTTCCAAATTCCCCTGTAAATGTGGTTACTTTTTTTTT
