# Supplementary material for: Chromothripsis during telomere crisis is independent of NHEJ, and consistent with a replicative origin
Source: HighWire-hosted journal article supplement (doi:10.1101/gr.240705.118), 2019-03-14
Supplement: Supplemental_file_1.zip [file contig.3.DB73_length_599_mean_cov_9.39398998331.docx]

**DB73_length_599_mean_cov_9.39398998331**

ATGTATTTAGGAAACTATTTTGCATCTTTAAACAATTGAAGG|TCATTAAAT|AAAACGTGCATATTTTTGTGAGGTGTGAAATGTTTG
 >chr3:191669640-191669682 + E=1e-13 >chr3:191668672-191668791 + E=7e-60
AAAGACTGAATATTTATCCAAAAGAGATTGAGTCTTGCAACCCTAATAAAATAACTTATTCAAGCAAAGATCAACAGTGGACA|ATGAA
 p=4e-03
TTACTTTGGACATTCAAATGATTCAGTTAAACTAGGTATGTTAACAATTAATTAATTGAATTAACAAAACTGTTAATTCACTTGCTAAT

GTA|CTCAGTTTCCAGAACAATGCCTGGGGCACAGAGAAGGAGCTCAGTAAATATTTTAGTAAGTAAATGAATGAACAATCATTTGGGA
 >chr3:188573220-188573462 - E=6e-134
GTACTCCAAAGATTCATCCAACAGCATCTACTCCCATAGACATCCCCCAAATTTCATTACTATCCTCAGATGGCCTGCATCACCACACT

ATTTCAGCAGCCCCCTCTCCAGAGCCAGACTCTGTCTCTTTATCCTGTTGCTTTCTTCATAGTGCTTA|CTTGATATTTTTTATATCAA

AAATATTTTTCATCACTTAGTATAGAAATACTTAAAATATTATATATATTTTCTGTTATATAAATATAAT
