# Supplementary material for: Chromothripsis during telomere crisis is independent of NHEJ, and consistent with a replicative origin
Source: HighWire-hosted journal article supplement (doi:10.1101/gr.240705.118), 2019-03-14
Supplement: Supplemental_file_1.zip [file contig.3.DB73_length_689_mean_cov_7.4702467344.docx]

**DB73_length_689_mean_cov_7.4702467344**

CGGCGCCATCTCAGTCGCCACACCCTCCGCCTCTTGGCTTCGAGGATTCTCATGCCTCAGCCTCCTGTGTAGCTGGGACTACAGGTGCA
 >chr16:23656159-23656422 + E=1e-135
CGCCACTACACTGGGCTAATTTTTGTATTTTTAGTAGAGGCAGGGTTTTGCCACGTTGGCCAGGCTGGTCTCAAACTCTTGGCCTCAAG

TGATCCACCTGCCTTGGCCTCTCAAAGTACTGGGATTACAAGTGTGAGCCACTGCACCCAGCCTAACTATATATATTATATATA|GGCG

GGCGGGCGG|ATCACTTGAGGTCAGGAGTTCAAGACCATCCTGGCCAACATGGTGAAACCCGGTCTCTACTAAAAATACAAAAAAAAAA
 >chr16:23661667-23661887 - E=2e-110
AAAATTAGCCAGGTGTGGTGGGAGGAAGAGGTGGTGTGTGGGGAGGGAGGGAGGCAGGAGAATCGCTTGAACCTGGAGGTTGCAGTGAG

TCAAGATCGCACCATTACACTCCAGCCTGGGCAATAAGAGCAAAACT|CC|TCAGTTGATCCACCTTCCTTGGCCTCCCAAAGTGCTGG
 >chr16:23635069-23635268 + E=6e-108
GATTACAGGCGTGAGCCACTGCGCCCAGCCTAGGTTCACATTTTAAATAGAAACTTCAGTCAGGGATGTCATTCTATTGATTTTTTTTT

AAACAAATCTCTCTCTCTTTAGATCTTTCAGATTCTTTCAAGACTCAAGCCTAGGTTATTACCTGCACTT
