# Supplementary material for: Chromothripsis during telomere crisis is independent of NHEJ, and consistent with a replicative origin
Source: HighWire-hosted journal article supplement (doi:10.1101/gr.240705.118), 2019-03-14
Supplement: Supplemental_file_1.zip [file contig.3.DB73_length_844_mean_cov_14.5734597156.docx]

**DB73_length_844_mean_cov_14.5734597156**

GGGCACTTTGCTAATCCATAGAAAACAGGAGATGGTTCTTTGGGGAAGGAAAACTCAACCATAAAAAGGATTGTGAAGAACAGAGTCAG
 >chr12:93362435-93362779 + E=5e-195
TACTTTTATTTATTTCCTAGTCTTGAGCATAAATGAGCTTCTAGGAAAGTGGAAGCACTCTGTGAAGAGACAACGCCCACCATCTTGCT

CCCAGGGTAGCTTCTGTGGATGGTGGAGAGCTGAGCTATAAAATAGCACAATGTGTTACCCATGGAAGGGCAGTCCTGGTTGAGGTTCT

TAATTGTGAATGTACAGATTCTGTTGAATGAATTGTGATAACCTCCAATTATCAGGAAAGAATCAATTAGGGAGAAC|CCCATCCAAAA

TTTAAGAA|CATCTTTTTAGAGTAGAGCCCTAGACAGCAATTGGGGATTAGTAGAGAGTCTCTAGGCCCCCAGGAAGGGGAATGCTAAG
 >chr12:93355191-93355417 - E=5e-121
ACTTCACAGGGCTCTAGTTGGGTAGAGCTGGGTTTTAGCTCTTGAGGCAGAAGTTCAATAGTTCAATTACATAGACTAGCCTCCCATAG

TGAGATTTAGGAGAGTATTATAACTCAGTGGATCCCATACAGGGATCACAGAT|ACTG|CCCCACCCCTATCTCCCTTTGCTGACTCTT
 >chr12:93350695-93350954 - E=6e-1
TTTGGACTCAGCCCACTTGCATCCAAGTGAAATAAACAGCCTTGTTGCTCACACAAAGCCTGTTAGTGGACTCTCTTCACACAGAGGGG
44
CATGACATTGATATTCTGGAATGTTAAATATGTTACAAAGTAAATTCATGATGCCAGAGTTAAAAACAAAAACATGACGGGGCTTGGTG

GCTCACGCCTGTAATCCCAGCACTTTGGGAGGCCGAGGCAGGCAGAT
