# Supplementary material for: Chromothripsis during telomere crisis is independent of NHEJ, and consistent with a replicative origin
Source: HighWire-hosted journal article supplement (doi:10.1101/gr.240705.118), 2019-03-14
Supplement: Supplemental_file_1.zip [file contig.3.DB75_length_556_mean_cov_22.7517985612.docx]

**DB75_length_556_mean_cov_22.7517985612**

TTACAAAAAAAGCACTTGTCATGT|TTTTGAATTTCTATATGCAAAAAGTTACGACATATTTAAAGTCTAAACAGAGACATAGGATGGC
 >chr13:63632871-63633116 - E=9e-77
TTAAGAAAACCAAAACGCTTACCTGAATAGATAAAAATAAAGGCCATAAATCATAATAACAATAAAAAACACAAATGCAGAGAAGTAAG

ATAGTACTGTAACTGGTATTAACACTGAGAACATCTGTTGAATACTTTTGGCCTAGAACTGAATCTTAGTGGGTATATATATAT|TTTT

TTCCT|TTTCTTTTTTTTTTTTGCACAAATTGAGAGATAAACTACCAAACCTGGAACCTACAAAGGGTGAAAGGTTAGTTGTTTAGAGA
 >chr13:63632702-63632824 - E=3e-38 p=3e-02
CGAGACCCCACAGGGAATGATCTCCTGAGTGCACAAAAATGC|CCACTTGTTAACAAAAACG|AAAGATAATGTATTTGCCCATATTGA
 >chr13:63632547-63632689
CAATAATATTGAGTAGAAATCAAAAATAAAAGCTAAAAGTCTCCACTAAGTTTCTAGAGACACAATCTAATTGTTACCGGTGGAGCGTG
- E=1e-61
TCCGGATCCTTGGCGTTTTGAACAAAG
