# Supplementary material for: Chromothripsis during telomere crisis is independent of NHEJ, and consistent with a replicative origin
Source: HighWire-hosted journal article supplement (doi:10.1101/gr.240705.118), 2019-03-14
Supplement: Supplemental_file_1.zip [file contig.3.DB75_length_579_mean_cov_5.9585492228.docx]

**DB75_length_579_mean_cov_5.9585492228**

CCATAATCCTCACATGTCAAGGGGGAAGCCAGGTGGAGGTAATTAAATCATGGAGGCAGTTTCCCCATGTGTTCTCATGATAGTGAGTG
 >chr11:25822243-25822515 + E=5e-152 p=0e+00
AGTTCTCATGAGATCTGATGGTTTTATAAATGTGTGGTAGTTCCTCCTGTGTTCTTTCTCCTTCCCGCCATCTTGTGAAGAAGGTCCCT

TGCTTCCCCTTCACCCTCTGCTATGATCGTAAGTTTTCTGAGGCCTCCCCAGACATGCTAAACTGTGACTCAATTATACCTCTTTCATT

TATAA|TTT|ATAATTTCATTTATAAATTACCCAG|TCT|GTACTTTTTTTAAATTTTTGAGTGTTAAAAAAATACATGATGTCTTAAA
 >chrX:12448154-12448182 + E=4e-02 >chr11:25835185-25835464 + E=3e-156
ACAATAAGATTTTACAATGAAGTAAGGACTTAATATGAATAACTCTGGGTCCGTACCACATCCTCAATCCTTTGCATCATATTCATAGA

AAAATAAACAAATACATGCTAGCTTTGCTGTCAGTTTTCTTAGAGTGTTTTTATAATTTTGATATTTTAATAACAATACAAATGTATCA

TCATATTTATATAAAGAAAAATTCACATCAGAAATATGTTGGGAACACT
