# Supplementary material for: Chromothripsis during telomere crisis is independent of NHEJ, and consistent with a replicative origin
Source: HighWire-hosted journal article supplement (doi:10.1101/gr.240705.118), 2019-03-14
Supplement: Supplemental_file_1.zip [file contig.3.DB77_length_309_mean_cov_4.60517799353.docx]

**DB77_length_309_mean_cov_4.60517799353**

ACTGCACCCAGCCTCTAATTCTAATTTATTAATTGAATAAATTCTCTTCATTAACTGACATATAAAACAACACATTTGTCAGATAAATG
 >chr9:30560801-30560929 + E=1e-65
ACCTTATATCAGGTACTTAGGCAAAATATCATGTTCTT|T|TTTTTTTTTTTTTTGAGACGGAGTCTCGCTCTGTCGCCCAGGCCGGAC
 >chr9:39599625-39599683 + E=2e-20
TGCGGA|CTT|TAGAGTAGTTGTGATTTGGATTGCCAGTTGTTTGAGAAGTCATCTTTTTTTAATCTATCTGGTTAGAAGAAGATCTGG
 >chr9:30560925-30561052 + E=4e-65
TAGATAGACAGAACCAGAAGCCTCACTGGTTAACTACATGCAACTA
