# Supplementary material for: Chromothripsis during telomere crisis is independent of NHEJ, and consistent with a replicative origin
Source: HighWire-hosted journal article supplement (doi:10.1101/gr.240705.118), 2019-03-14
Supplement: Supplemental_file_1.zip [file contig.3.DB79_length_290_mean_cov_5.75172413793.docx]

**DB79_length_290_mean_cov_5.75172413793**

CTCAGCTCACTGCAGCCTCTGCCTCCCAGGTTCAAGAGATTCTCCTGCCTCAGCCTCCAGAGTAGATGGGATTACAGGTGCCTGCCACC
 >chr22:18129551-18129722 + E=3e-80 p=0e+00
ACGCCCAGCTAATTTGTGTGTGTGTGTGTGTGTGTGTGTGTGTGTATAAACTACATATATATATATATATATA|TATAT|ATATATATA
 >chr1:7435382
TATATATATATTTTTTTTTTTTTTTTTTTAAAAAT|TGGTTCTCTCTG|TGTTTCCCAGGCTGGTGTGCAGTGGGGGAATACTGGCTCA
5-74353874 - E=4e-15 >chr6:108301144-108301188 + E=4e-06
CTGC|TAGTGAGTAGCGGGGGCTGCAGG
