# Supplementary material for: Chromothripsis during telomere crisis is independent of NHEJ, and consistent with a replicative origin
Source: HighWire-hosted journal article supplement (doi:10.1101/gr.240705.118), 2019-03-14
Supplement: Supplemental_file_1.zip [file contig.3.DB79_length_388_mean_cov_8.7293814433.docx]

**DB79_length_388_mean_cov_8.7293814433**

CCTGACAAACCAAATGAATGACAAGGGCAGAACCAGAATTCTCACTCACATCCCCAAATGTGGCAAGAGGAAGTCTTTTTCCTCTTCAG
 >chr8:22254072-22254357 - E=2e-146
TTGAGTAGTAGGAGGAAAAGCTACCGGGGAAGAACAAAAAAAAAACGGTGCACCTGGACCAAAAACAATGGGCTGACTCCCTTGGAAGG

AAATAAGGGCTCCCGGGCCACATTCTGAATTGAGGACATGATCCAATTCCAAATTCCACTTAGTCGTCCTTCTCTCTCTCTCTCTCTCT

CTCTCTCTCTCTCTCTCTCTC|CGCCCCC|CCCCTCTCTATTTATTTATTTATTTTTTA|A|GATGGAGTCTTGCTCTGTTGCCCAGGC
 >chr3:73371882-73371912 + E=2e-03 >chr6:89181864-8918192
TGGAGTGCAGTGGCGTGATCTCGGCTCACCGTAACC8 - E=5e-21
