# Supplementary material for: Chromothripsis during telomere crisis is independent of NHEJ, and consistent with a replicative origin
Source: HighWire-hosted journal article supplement (doi:10.1101/gr.240705.118), 2019-03-14
Supplement: Supplemental_file_1.zip [file contig.3.DB79_length_391_mean_cov_8.82352941176.docx]

**DB79_length_391_mean_cov_8.82352941176**

ATTTTCCTTTCTCCTGCTGGTTTTGGTAAACAGGTTATGCTAGACAAATTCATAAGTGAGTTGAGGCTGGCAGTTGGTGACAGACATTT
 >chr1:180282366-180282623 + E=2e-143
CAACCTCAATTATTAGGCTGACATATGTAGGTAGTATAATAGCTAGTCCAATAGGTTAAGACTCCTAGATAGCACAGCGAGGTTTCTCC

AGCATTATCCCTCCAGAATGATTTGGCTTTTGTTTCCGCCAAGCATCCCAGAAACACTATCAGCTTGAAATACCTTAGT|ATTTCA|AT
 >
ATACATATAATTTACATATAATATACATATA|ATT|TACATATAATTTACCATCTTTACCATTTTACCATTTTTAAGTGTACAGTGTTT
chr15:47369104-47369137 - E=2e-02 p=0e+00 >chr1:180196685-180196748 + E=5e-18
ATGCTTTTTTTAAGAAAA|AACCAATTACTGAAGTGCTCT
