# Supplementary material for: Chromothripsis during telomere crisis is independent of NHEJ, and consistent with a replicative origin
Source: HighWire-hosted journal article supplement (doi:10.1101/gr.240705.118), 2019-03-14
Supplement: Supplemental_file_1.zip [file contig.3.DB79_length_409_mean_cov_4.76772616137.docx]

**DB79_length_409_mean_cov_4.76772616137**

AGAATCAGTATCACTTGCATTAGAGAAGGGGGAGGGTAGGTGGCCATATGGTGGGAGGGGAT|GCATGTTAATGAAGTAAA|TCCCTCT
 >chr8:68492392-68492454 - E=9e-26 p=3e-02 >chr9:
GGGGGTGACTAGAACCGCTAGGCAACAGGGTACACAGCAGGGCAGAGTGCTGCATGAGCAGCCAGGAGTGGGCCTGCAGCCAGCCCAGG
131855664-131855870 - E=2e-109
CAGGACAGGGAGGGGAGAGCGAACAGTCAAGAGGCTGCCAGACAGACACCCTGGATTCCCAAAACTCGCCTAAGAACCCTACAGGTCTG

AATATAAGGTTGGATTTTTTT|CTGTATTTTGTAATTCCCTCAATGAATTTTTCACTTGCAGAACTTCTATTTTATTATTTAAAATAAT
 >chr2:52805961-52806084 + E=2e-62
AACTGTCTCTTCTTTTATATCCCAAATTGTGTTTTTTTTTCTAATTTATATGTGTT
