# Supplementary material for: Chromothripsis during telomere crisis is independent of NHEJ, and consistent with a replicative origin
Source: HighWire-hosted journal article supplement (doi:10.1101/gr.240705.118), 2019-03-14
Supplement: Supplemental_file_1.zip [file contig.3.DB79_length_457_mean_cov_6.31509846827.docx]

**DB79_length_457_mean_cov_6.31509846827**

GGTTGCAAACCTACCAAGAATGCATAATAGTCTCACTTTTCCCCAATAAAGAGATGCGTGTGACTAGTTTTGGACTTTTAACCTTAATG
 >chr1:35644676-35644949 - E=8e-153
GGGGTTGCATGTCTCCTATTGTTAATCATTGTCAGCTGCAGTGACATGATCCACAGTCCTGCATTTACTGCCTTTCACTTAATGATTTT

GGACAGGTTTTAGAGAGCCAGGATGTTGGTCTGGGCCTTTATTTGGTTTTGGCTTTAGCTGATAATGTTTTAGTGATGTCAGCTAGTGC

AG|TTCT|TGTATTTTAGTAGATACGGGGTTTCACCCTATTGCCCAGGCTGGTCTCGAACTCCTGAGCTCAGGCAATCCACCCACCTTG
 >chr1:35710338-35710477 - E=4e-72
GCCTCCCAAAGTGCTGGGATTACAGGTGTGAGCCACCGCACCTGGCCT|AAATTT|ATATGGATTGTGAGTCTACAAAATACCACTGGA
 >chr1:239556256-239556311 - E=2e-21
TTAGGTTTCAATGGAA
