# Supplementary material for: Chromothripsis during telomere crisis is independent of NHEJ, and consistent with a replicative origin
Source: HighWire-hosted journal article supplement (doi:10.1101/gr.240705.118), 2019-03-14
Supplement: Supplemental_file_1.zip [file contig.3.DB79_length_593_mean_cov_5.73693086003.docx]

**DB79_length_593_mean_cov_5.73693086003**

AATGTATATAAGACATGTGAAGCACTCAAAGGCTAACCGGTATGATGAAGACAGTCATCTGATATGTTGCAGTCACTTGATGGTTCTAG
 >chr9:130158129-130158328 - E=5e-108
CAACCAACATTTTTCAGTCCTGACCACAAGCCTATCCTTAAAGACTTAGGCAACTGCCCTTCTGTACTCCCACAGCATCTAATGCTTGA

TAACTCGAGCACTAGATGTGT|CACATTTGCACACAGAAGTGTGTTAAGTATGAGTT|TATCCTTTGCCCACTTTTTGATGGGGTTGTT
 >chr9:115761624-115761659 - E=2e-09 p=1e-03 >chr9:123313955-123
TGTTTTTTTCTTGTAAATTTGTTTGAGTTCATTGTAGATTCTGGATATTAGCCCTTTGTCAGATGAGTAGATTGCAAACATTTTCTTCC
314314 - E=2e-198
ATTCTGTAGGTTGCCTGTTCACTCTGATGGTAGTTTATTTTGCACACAGCACTCTTAAGTACATTAGCATGTGTCTCTTTCTTAGGACA

TTTTCCTGTAAAATCATATTATTACCTAATATAAAATTGTTATTCAAGTTTTCCCGGGTATCATCATATGGTTGTTTCTGTAAAAAATT

CAAGATTCTATTGTACTTATTAGTCATGCCTCTTCAACCTCCTTTTATTTAGAAGAGTTCA
