# Supplementary material for: Chromothripsis during telomere crisis is independent of NHEJ, and consistent with a replicative origin
Source: HighWire-hosted journal article supplement (doi:10.1101/gr.240705.118), 2019-03-14
Supplement: Supplemental_file_1.zip [file contig.3.DB80_length_483_mean_cov_12.4223602484.docx]

**DB80_length_483_mean_cov_12.4223602484**

TTAAACATTGTTGAAAATTTAAGTTCTAACTTAAATGCTGTTTTCAAAAGCGTACTTCACTATTTCTATTCTAATATTCTATCAACAAG
 >chr4:58615881-58616146 - E=6e-148 p=1e-02
TTAATCTGAACACAGCAGTATAAAATGAGACCCTTTTAGGTGAGGCCTTAAGTAACAAAATGGAAGCCTTTACCAAATATGTATTTAAA

CATATTTGGTGAAAAGTGTTCTACTTCAATACAGAGTATATTTCATCAAAATTGCTAAATGTTAACCTTCAAATGTTATTTTTAA|TA|
 >c
TATAAAAAGATAATTGAAATATTTCATGGAAATCCTTTTAATTTCACTAATTGAAATTCTATCTGCAATGACTATTCCCTGAGCCTTCT
hr4:58614648-58614746 + E=2e-47
A|TTTTTA|TATACTTCATAAGTGCTTATAATGTTCAAGATACTGTTTAGGATAACTAGGGAATACAGACAAATCTCATTTTCATACAC
 >chr4:58614530-58614658 - E=2e-65
TTATTCTTTAATTTGATTATCTATTTATTCAATAAGTATTTT
