# Supplementary material for: Chromothripsis during telomere crisis is independent of NHEJ, and consistent with a replicative origin
Source: HighWire-hosted journal article supplement (doi:10.1101/gr.240705.118), 2019-03-14
Supplement: Supplemental_file_1.zip [file contig.3.DB81_length_675_mean_cov_10.0.docx]

**DB81_length_675_mean_cov_10.0**

AGATATTATAACAGGTAGCAGGCTAGATTTGACCCATGGGGCATAGAGTTTGGTGACCCCAGCTATAAACTAGGAAGACAGCAGTAAAG
 >chr3:51692487-51692891 - E=2e-231
GGGGCTGGGTTCTAGACTAGGAAGAATCCAGTAAGGAGGCTGGGAATGGTGTTTTCTATGAGTCTGGGTATTTCATGGCACTTTTTCCC

TAACCTCAAAGGTACTCTAACCCAATAGAAGCTAGGGCAAAATCTCCTTACTGAACAAAAAGTCTCAAAGAGCCTCACACAATCATGGG

GCTTATTTAAAGGCTAATATGTAAAACAGGCTTGGATAGAAGACGTGGGTGCAGAAAAGAGGGGAAAAAAACAGGCTTAGATTGTGTCT

CAATACTGTTTAGCCCAGCTTTTTTATTCCACCAATCTCATATCCC|TC|CAGAATCTTTTTCAAAAGTGCCCTTCC|AGCTTCATTTG
 >chr3:51722532-51722561 + E=1e-05 p=2e-
GTGGCCAGG|TGGCCACTCCTGGCTTCTATCTGGCCACCCCTCTCCAATCCAGGCAGAGATGATCTGACAAGTCAGGAGCCCCTTGGCC
02 >chr3:51744373-51744597 - E=5e-123
GAGAGCCGATTTCACAGTTCCCCTCCACCACTGCCTTGAATGTGGCCCACCTCTCTCTGAGCCTTCGTTTCCTCATCTATAAAATGGGT

TAAAAATAATAGCAGCTAATATCAACGGTGCCCTTATGACTTGCCGGGCCCCTGAT
