# Supplementary material for: Chromothripsis during telomere crisis is independent of NHEJ, and consistent with a replicative origin
Source: HighWire-hosted journal article supplement (doi:10.1101/gr.240705.118), 2019-03-14
Supplement: Supplemental_file_1.zip [file contig.3.DB82_length_360_mean_cov_10.9416666667.docx]

**DB82_length_360_mean_cov_10.9416666667**

CAATGATATTAAGGTCTAGTTGACTTCACATCCTCTATTCGTTTATTTTCCTTCTTTGTCTTACTTCCCCACTATGCTAATAGTATTTT
 >chr10:64777091-64777241 - E=7e-79
TTGGAATAACTTTCCAAATAAAACTATTTGCACCTGAATTATTTTCTGAAGGTCGGCAT|CT|AAAAACACTTCTCAAGGTTTGGCAAT
 >chr10:64775085-64775155 -
CACTTCATCACTTCTATGGAGATCATCTAGTCCAGTTATCTT|GA|CTGGGCACGGTGGCTCACGCCTGTAATCCCAGCACTTTGGGAG
E=1e-30 >chr15:27004563-27004703 - E=8e-64
GCCGAGGCGGGTGGATCACGAGGTCAGGAGTTCGAGACCAGCCTGGCCAACATGGTGAAACCCCGTCTCTACTAAAAATACAAAAATTA

GCTGGGCA
