# Supplementary material for: Chromothripsis during telomere crisis is independent of NHEJ, and consistent with a replicative origin
Source: HighWire-hosted journal article supplement (doi:10.1101/gr.240705.118), 2019-03-14
Supplement: Supplemental_file_1.zip [file contig.3.DB82_length_411_mean_cov_9.3503649635.docx]

**DB82_length_411_mean_cov_9.3503649635**

GTGGCGGGCGCCTGTAATCCTAGCTACTTGGGAGGCTGAGGCAGGAGAATCACTGGAAACCGGGAGGCAGAGGTTGCAGTGACCCGAGA
 >chr10:70691182-70691350 - E=8e-82 p=0e+00
CTGTGCCACTGCACTCCAGCCTGGGCAACAGAGCAAAATTCCATCTCAAAAAAAAATTGTGTGTGTGTGTGTGTGTGT|GTGTGTGTGT

GTGTGTGTGTGTG|TATATATATATATATATTTTTTTTTTAATGATCCGTCACCCACCCACCAGCCTGGGTGACAGAGCAAGACCCTGT
 >chr10:70691067-70691165 - E=1e-42
TTCTGAAAAAGGAAATAAAGA|G|TTTTGGCTTAAAAGGGCAGGATATCTTGAAGGGGCTTACAGATCGTAGGTACATTTAAAGATTTT
 >chr10:70634131-70634256 - E=1e-63
CTATTTTAATTGGTTAAGGAAGAGAAGCTTTGTTTAAAAGTCTGGGGTCAGTAACTGGC
