# Supplementary material for: Chromothripsis during telomere crisis is independent of NHEJ, and consistent with a replicative origin
Source: HighWire-hosted journal article supplement (doi:10.1101/gr.240705.118), 2019-03-14
Supplement: Supplemental_file_1.zip [file contig.3.DB82_length_609_mean_cov_6.89655172414.docx]

**DB82_length_609_mean_cov_6.89655172414**

CTAATGTAATTATTGAGGCATTGGTGACAATATTTCTTAGGGCCCTTCTAAGAAATATAGTGAGGGATGGACGAATAGAATGCATGGAT
 >chr5:165065159-165065476 + E=5e-176 p=3e-03
TAATCCAACATCCCTATTCTGTTAAACCTTTGGATTCTTTTCTGTACATTACAATGCAGGCTAATTGTAGGCTAATACTGAGTCCATGT

TTCAATCTATCAACCCAGAAAACCATGAGAACCGTGGCCATCTGTTCATGCTAACACCTTGAATTCAAAATCTCTGGTATGTGTATCAT

TATTGGTGGAATTAGACAAATTCTAACATAGCACTCTTGGAATCTGTGT|G|AGAGCTTTCAGGAAGAGCATGTCAAGAACAGAGATTT
 >chr5:165066056-165066161 - E=2e-51
CAATTTTCAGCTCAAGATGTTGTCAGAAAACCATAGAACTTCTGTGATTACCCTAAAGGAGTATTCC|AAAGGTTTA|ACAGTTTGCAG
 >chr5:1650
CCTAGAATCCGGTGATTTCCTAGGAACTATTAATAGGTTCCTGCAGGATTTTTTTGCAAAATTTGAATCCATCGAACTGCATATTGTTG
66645-165066824 + E=5e-96
TTACAGTAACAAAACCATCACTTCTGTCTGCCCTTTACTTTTCAATCTAATTTATGTGACTTCCATAGTAGATGATAAG
