# Supplementary material for: Chromothripsis during telomere crisis is independent of NHEJ, and consistent with a replicative origin
Source: HighWire-hosted journal article supplement (doi:10.1101/gr.240705.118), 2019-03-14
Supplement: Supplemental_file_1.zip [file contig.3.DB83_length_607_mean_cov_7.41350906096.docx]

**DB83_length_607_mean_cov_7.41350906096**

AGGCAGGAAAGAAGAAAGAGACCAAGGTGCGAGGAGCGGACAGGGAAAGAGACCTCAACATGACCAGGGATGGGAGGAGAGAACTCCAT
 >chr2:11882676-11882831 - E=1e-81 p=4e-02
TACTTAGAAACAGTGGCTGCTATGCTGGGAAGTGTGGACTGTTACAGTGGGCTCTAATTCCAGGAG|TGCTGGAA|TCTCCAGTGCTAA
 >chr2:118825
GAAAACAGCTACACAGACAGAATGCTAA|GGAG|TCTCACTCTGTCGCCCAGCTGGAGTGCAGTGGCACGATCTCGGCTTACTGCAAGC
13-11882558 - E=2e-15 >chr2:11881527-11881930 - E=7e-225
TCCGCATCCCAGGTTCACATCATTCTCTTGCCTCAGCCTCCTGACTAGCTGGGACTACAGGCACCCGCCACCGTGCCCGGCTCATTTTT

TGTATTTTTAGTAGAGACAGGGTTTCACTGTGTTAGCCAGGATGTGTATTTTTTTATAGAGACAGGGTTTCGCCATGTTGCCCAGGCTG

GTCTCAAACTCCTGAGCTCGAGTGGCAATGTTTGGAACCAATTTACGCAGTTCTTTTCCTTGCAGTTGCCAAACAATATTATTTATCTA

ATGGTCATAACACCTTAACAGTAATAGAACTACTGAACAGCAGTGTTTACTCTGCTCATGGATGAGGTTTCTAGTTG
