# Supplementary material for: Chromothripsis during telomere crisis is independent of NHEJ, and consistent with a replicative origin
Source: HighWire-hosted journal article supplement (doi:10.1101/gr.240705.118), 2019-03-14
Supplement: Supplemental_file_1.zip [file contig.3.DB83_length_1019_mean_cov_13.6467124632.docx]

**DB83_length_1019_mean_cov_13.6467124632**

ATGAAGACTTAATTCAAAACTATTGCTGAGCA|TGGTGGCTCATGCCTGTAATCCCAGCACTTTGGGAGGCCGAGGTGGGTGGATCACT
 >chr4:126882174-126882640 + E=5e-172
TGAGCCCAGGAGTTCGAGACTAGCCTGGGCAGCATGGTGAAACCCCGTCTCTACTAAAAATACAAAAATTAGCAGGGCGTGGTGGCAGG

CACCTGTAATCCCAGTTACTCGGGAGGCTGAGGCAGGAGAGTCACTTGAAACCAGAAGGTGGAGGTTGCAGTGAGCTGAGATCGTGCCA

TTGCACTCCAGCCGGGAAAACAGGGCAAGACTCCGTCTCAAAAACAAAAAAGACCAAAAAAAACAAACCAAACCAAACAAAAAAATATT

GCCTTTTTCGATACTACCTAAGGCCTGCCCTTCTCCCATCCTGTGCCTATAAAAGCTCCAGACTCAGCCACAATGAAGAGATACGCGAC

TTTGGGTGAAAGACCATCTTCCTGTCCCCTCTCCACTGAGAGCTGTTTTGTCAC|T|TTGGCTTGAAGGCAGGGTTTCACTGGGGACCC
 >chr4:126881921-126882018 - E=2e
ACCCCTATCTGCCTAGGCATTTGTCAATCTCCTGCTACTATCACAAGCATATAGACAACGGTAT|ATGCCTACTCGGCCCACTGG|GTC
-46 p=9e-03 >c
CTCATCACCCATCAATTGTCAGCATGACCTCATTCTTCTTGGATGTGGGAAAAGATATTCTTGAGTTCGGGCACACAGAAGGCTATAAT
hr4:126882654-126883058 + E=5e-231
ACTGTGACTTTCTGCCCTCCATCATTGTAAGGCAGCTGCCCCAAGTGATGGGAAGCAGCAGCAGGGCTGAGCCGGCCACAGAGCTGTAG

CCCAGAGTCGGGGAAGGGGCTGATTAAGCTGTTAACATGCTGCTGTCTGTTGGGCTGTGGGCAGATGGACTAAAAGAGCCAATTAGCAC

ATTGTAACACCCCTTCTGGGGCTTTGAGGTCATGGACACTCTTGACTGGGGACCACCACATTTCCCTCAGGGTGACATGATTGGAGCCT

GCATAGAGCCTGCCCCTGCCAGCATTTGGAATGGTAGCTGAACTC
