# Supplementary material for: Chromothripsis during telomere crisis is independent of NHEJ, and consistent with a replicative origin
Source: HighWire-hosted journal article supplement (doi:10.1101/gr.240705.118), 2019-03-14
Supplement: Supplemental_file_1.zip [file contig.3.DB84_length_349_mean_cov_2.01719197708.docx]

**DB84_length_349_mean_cov_2.01719197708**

AGTTAGGATCTGACCAGAAGGGACTCACACTGGTTACATAGGGCATAACTTGAGGGAAAAAAAAAGACAAACACCAACAGCAATTGCAG
 >chr8:36339152-36339412 + E=2e-140
CACACTTAACAATAATAATAATAATAATTTAAAAATACTCAGCACCACAAAATACTTGAAAAATGGCAAGCAAACCCTCTCCTTCTCAG

AAAAATGCAACATCATAGAATTATGTGGTGATAGAAGTAGGTGATAAAACTAGGAAGTCACTGTTTTTTTTTTTTTTTTTT|AGATGTG

GG|TTTGCTCTTGTTGCCCAGGCTTGAGTTC|TATTGCCCG|ATCTCCACTCGCCGCAACCTCCGTCCCCCGGG|CTCTAGTGATTC >chr6:64160412-64160440 - E=2e-05 >chr2:14021808-14021840 - E=9e-02
