# Supplementary material for: Chromothripsis during telomere crisis is independent of NHEJ, and consistent with a replicative origin
Source: HighWire-hosted journal article supplement (doi:10.1101/gr.240705.118), 2019-03-14
Supplement: Supplemental_file_1.zip [file contig.3.DB85_length_700_mean_cov_7.93571428571.docx]

**DB85_length_700_mean_cov_7.93571428571**

CGCCGCACACTGCCTCCACCAGTCACTCGATCCGGAAGATCCGACCCTACGTGATTCAGACTTGCTCAGCCCTTCTGACTTCAAAATCA
 >chr3:186944026-186944289 - E=2e-146
TCCTGGGTGAGTGAGTGAGGGGCAAGCTGACTCCCAAAGCCAGCTGTGGTTCTGGGAATGACCTACTGGCCCTTTCCAAGGCGTGTCTG

CTCACTCACTCGCTCACTCATTTGTCAGGGCAGGACACCTGGGATGGAGGTCCAGGAACCTGAGTCCAAGTGCAAGATATGATTC|G|T

GAGAAAATTCAAACAGCAGCAGCAGCCACCATTTTAACTACAAATATCAATGCAGCAGGCTACTCAAAGTTCTCTATGTGGTAGGACAA
>chr3:191777690-191777893 - E=2e-107
TGAGACTAATTAGTAAGAGGCTAATCTCCTGTTTCATCTTCACTAATTGATATTTCACTTTTGATCCTCCTTGCTCTGATTTGGGTAAT

ATCCACATAAAGAACCTGAATTTT|GTAAATATTT|TCTACTAAAAATACAAAAATTAGCTGGGTGTGGTGGCACATGCCTGTAGTCCC
 >chr16:90010874-90011097 + E=2e-122
AGCTACTTGGGAGGCTGAGGCAGAAGAATTGCTTGAACCCGGAAGGCGGAGGTTGCAGTGAGCCGAGATCGCACCTCTACACTCCAGCC

TGGTGAAAGAGCGAGACTCCGTCCCCCACCTGTCCCCACAAAAAAATTAGGAAGGTGTGGTGGCGTGTGTGTGTAGCCCCG
