# Supplementary material for: Chromothripsis during telomere crisis is independent of NHEJ, and consistent with a replicative origin
Source: HighWire-hosted journal article supplement (doi:10.1101/gr.240705.118), 2019-03-14
Supplement: Supplemental_file_1.zip [file contig.3.DB87_length_716_mean_cov_12.1103351955.docx]

**DB87_length_716_mean_cov_12.1103351955**

TCCAGCAATCAAGAAACAAAATATATTCTCAGCACTGGGGTCTTGACCCGACACTCACTCCCTCCCTGCCCATGTGATTAAATTTGTCT
 >chr3:100944953-100945079 + E=5e-64
TTAGATTAATGGGAATCTTCTAAACTTTATATATAT|A|CTGCTCTCCAGCCTGGGCAACAGAGCAAGACCCCATCTCTTTAAAAAAAA
 >chr1:31737797-31738029 - E=9e-128
ACAAAATCACATGTGAAAGCGTGGTATGAGGAAAGCCTATCCCTCTCTACCTGCTGGGGGTTGGCAAGATTTGACAGGCCACCTCACCA

ATTGGCCCCAAGTCAAGAAGCAGCTGTGTTACATAAGGCTTCTGGTTCCTGCCAAATGTTGCCATGCCAAAGTAAGGAGAGGGCAAGGA

ACC|TATATATGCATTCATCCTGAAAACTAAGAAAAAAAGGATATTAACATAGTTAACATAACAATAACATGGTCTTGATTAATATGCT
 >chr3:100945117-100945476 + E=3e-198
CAGGAAATGCAAGACACTGATAGAAGCATAAAAATACAACCCTAATTCTATCCTGCAGCAAAAAAGTTTGCTTTTTCTTTAGCAGTTTG

ATCAAAAAAAAGAAAGAATTTTATTTAGATGAATGCCTGATTATAAACTATCCATTAAGACTATTTCAAAGGTTTCCCCTTCTACCCAA

CAATAACAAATATGCTCCAAAATATTCCCTTACTAAGCCAGACTTCTCCATGTAAGAGTCTCACCTTATTTTCCTATTGAAAAACCCGA

GGCACAG
