# Supplementary material for: Chromothripsis during telomere crisis is independent of NHEJ, and consistent with a replicative origin
Source: HighWire-hosted journal article supplement (doi:10.1101/gr.240705.118), 2019-03-14
Supplement: Supplemental_file_1.zip [file contig.3.DB89_length_665_mean_cov_8.4045112782.docx]

**DB89_length_665_mean_cov_8.4045112782**

TTTTATCACTGAAAGCCCAGGCAGGCAAATGAGGACCATTGGTCACTCTGGCCAGCTGCCACAGCGAAAAGGGAAAGGCAGTGGGTTGA
 >chr19:42404832-42405112 + E=1e-138 p=0e+00
GGAATCCTCACTGGTTTTTTTTTTTTTGAGACGATCTCGCTCTGTCGCCTAGGCTAGAGTGCAGTGGCGTGATCTCCGCTCACTGCAAC

CTCCACCTCCCAGGTTCAAGCGATTGTCCTGCCTCAGCCTCCCAAGTAGCTGGAACTACAGGTGCCCACCACCACTCCTGGCTAA|TTT
 >c
TT|TTGAGACAGAGTCTCATTCTGTTGCCCAGGCTGGAGTGAAGTGGCAAAATCTTGGCTCACTGCAACCTCCACCTCCCAGGTTCAAG
hr19:36325956-36326108 - E=1e-79
CGATTCTTTTGCCTTAGCCTCCCGAGTTGCTGGGATTACAGGCACCTGCCACCACACCTGG|TA|GCATTGAAGGGGGAGGGTGGCTGG
 >chr19:38903917-3890416
GGCGGGGACAGAGGAGCACAGTTAGTCACTGCATAGGCTTAGGGGGGGTTCGAGGTAATTGGGGGAGTCCGAGGCCAGGGGTTGGGTCT
5 + E=2e-137
CACCAGGCTCTTGGGACAACGCGGCTCCCGGGCATAAGAAAGCTCATAGATCTCGTCTTCCGTGTAGAAGAGGTCCAGGGAGAGCTGGA

GCAGACAGGGGTGTTACGGATCCTCCCATCTATAGCCCTGCCCCAG
