# Supplementary material for: Chromothripsis during telomere crisis is independent of NHEJ, and consistent with a replicative origin
Source: HighWire-hosted journal article supplement (doi:10.1101/gr.240705.118), 2019-03-14
Supplement: Supplemental_file_1.zip [file contig.3.DB89_length_669_mean_cov_4.70852017937.docx]

**DB89_length_669_mean_cov_4.70852017937**

AAGCTGCCACTGGAGAGCTGTCAACCTAAAATAATCTCACATGTTCTCAATTGAAGAACCCTCCCAGGAAATGGATGATCAAGGAAATG
 >chr13:68663593-68663906 - E=1e-173
ATTACTCTTAAAATAAAAGTGTTTTTTTGAGATTCTAAATAGATGGTGTGTCCATAGTCCTTTCTCATGTCATTTTCTCAGACCAGATC

ATGTCTTTATCAATTAAGGCATAGCTAAGTATATTCATATTGACATTAAAATATGAATAACACATAGAATCAGTTTTGACATAGTGTTC

ATAAATCAAGATTGGGTATCTTAGGGAGACCACGTTTCTAAATGAT|GGTTCAGCTGGCTGTTCTGCTGTCTCCCTTTGGTTCCTCATG
 >chr19:36376350-36376581 - E=3e-127
TGGCTGCAATCAACCTGAGGCCCAACTGGCCTGGAAATCCACAACACCTTCACTCACATGCCTGATAGCTCAGCTGAGATAATGGAGCT

TCCAGGAGTGGCCCAAGAGTCTTTCCATGCAGTCCAGGAGGGCAGGTGGATCTCTTAACTTCAGGTGGTGGCTCAGTGGTTCCAAGAAA

GAGAGATCCA|A|ATTAGTGATGATGTGTCCTATCTGCAGGTACAGGAAGAGAGCTAATGGGGCAGTTTAATATTTGACATCTTTATTT
 >chr13:68663467-68663593 - E=5e-61
TTATGCATGCTTTCCCATAACTTATACAGCCATTTCAAGATTTACAAAA
