# Supplementary material for: Chromothripsis during telomere crisis is independent of NHEJ, and consistent with a replicative origin
Source: HighWire-hosted journal article supplement (doi:10.1101/gr.240705.118), 2019-03-14
Supplement: Supplemental_file_1.zip [file contig.3.DB89_length_852_mean_cov_14.2992957746.docx]

**DB89_length_852_mean_cov_14.2992957746**

TTCCTCACTGGAGCAGGACTCACTGCTCCACTCTCTGATCCAAAAGGCAGAACCCCTCCCAGCCCCCAAAAAGGCACTGATTGGCCTAA
 >chr2:70374267-70374480 - E=3e-116
CAGAGGGGGAGACATTTTTGGTAAGAGAGGTACTATGCCTCTAAAAGAGAAGGAATAACCACATTGTGTTGTCTACCCTCTGGGATTGA

GGGGCTGGTTTGTGTCAGCTCCTAAGTGCGT|CAGA|GCCAACACACAGAGAAATGCAGAAATGAAAAACCAAAAACCACTCCAACTGC
 >chr2:70550053-70550360 - E=9e-173
CCTGGAGTCCTTTGGTTTGGCCAAAGCCAGCTCTGTCTCTGCTCTGTCTTTGATTTGATGAGTTACACCAATAAATTCCTTTATTAATT

TCACTTAGTCAGTGTTGGATTTATTAAACCTGGGACTCATCTTTTTCCTTGAAGGCCTAAAAGAACTTCAGCATGTTTTTATCTTGGAT

TCATTTATCCTGATACTGATGCTGCAATCCCTGATTTCTTTGGGTCTGCCTTTGCAAGGCTGCCCTCTTATTT|TG|CTCTACTAAAAA
 >chr2:70503
TACAAAAAATTAGCCGAGCGCGGTGGCAGGCGCCTATAGTCCCAGCTACTCGGGACGCTGAGGCAGGCGCCTATAGTCCCAGCTACTCG
181-70503526 - E=3e-175
GGACGCTGAGGCAGGAGAATGGCGTGAACCCGGGAGGCGGAGCTTGCAGTGAGCCGAGATAGGCCACTACAGTCCGGCCTGGGCAAAAG

AGCGAGACTCCATCTCAAAAAAAAAAAGATTATTTTTCAAATCCAAGGAGTGATGCCACAGCACTTAACTACACTGGGGAATTTTTTTT

TTTTTTAGATGGAGTCTCACTCCGTCACCCAGGCTAGAGTGCAGTGGTGTGATCT
