# Supplementary material for: Chromothripsis during telomere crisis is independent of NHEJ, and consistent with a replicative origin
Source: HighWire-hosted journal article supplement (doi:10.1101/gr.240705.118), 2019-03-14
Supplement: Supplemental_file_1.zip [file contig.3.DB91_length_285_mean_cov_6.0350877193.docx]

**DB91_length_285_mean_cov_6.0350877193**

TCCCACCTCAGCCTCCTGAGTAGCTGGTACTACAGGTGCACACCAACACACTCAGCTAATTTT|CT|TTTATTTTTTCTTTTCTTTTCT
 >chr15:58199492-58199555 - E=2e-17 >chr7:90096543-900965
TTTCTTTTCTTT|T|TTTCTTTTCTTTTCTTTCTTCTTTCTTTCTTTCTTCTTTTTCTTTTCTTTCTCTTTCTTTTTTTCTTCTCTCTC
78 - E=1e-09 p=0e+00 >chr4:61223873-61224007 + E=2e-66
TCTTTCTTTCCTTCCTTCCTTCCTTCTTTCTCTCTCTCTTTTTCCTTTTCTTTCTTTCT|GTCTTAGATATACATAGACACCGGACTTA

ATGAAGTCTACAATCATATAAGG
