# Supplementary material for: Chromothripsis during telomere crisis is independent of NHEJ, and consistent with a replicative origin
Source: HighWire-hosted journal article supplement (doi:10.1101/gr.240705.118), 2019-03-14
Supplement: Supplemental_file_1.zip [file contig.3.DB93_length_710_mean_cov_8.87323943662.docx]

**DB93_length_710_mean_cov_8.87323943662**

CCAGCTAATTTTTTGTATTTTAGGTAGAGACGGGGTTTCACTGGGTTAGCCAGGATGGTCTC|TG|TACCTTCAGATACCCAGTTGGCC
 >chr3:128403571-128403633 - E=2e-25 >chr6:12083322-1208373
TTCTTCATAGACATATGAGTGTATATGTCTGTCAAGTGTGTGTGTGTGTTTCTGTACATTTCTACACATTCATCTTCATGGCGCAAAAT
0 + E=1e-230 p=0e+00
GTTTAGAATTATGTCTTTTTAATATAATATATGTTGAGCATTTTCCATCAATAAATATTTTGTAAAAAATACATTTAATGGCTAAACAA

CATTCTCTTGTATAGAAATATTTAAGTATTTGTTTAACCAGCTCCATATTGTTTTGTATATAGAATTCCTGCCAAGTTATTATTAACAA

AAATGCTGGAGTAATATCGCAATAGCAATTCATTTATTAGACAACTGTGTGTCAAGGGTCTAGTGACCCTGGCAACTATGTGCTCTGTG

GAGTAAGATACAGTTTGATGTGGAAAGCA|TCATTTTACCATTTATA|TTTTCATTTTACCATTTATATTTTCTCCAATTACTAAAGTA
 >chr6:12083085-12083306 - E=4e-121
CCTATAATGAATACATATCTTAATATAAACTGTGTAATTTAAATCCAATAAAAGCTAACAATGTGCTCAATTATCTTTTAAAAAATGTT

GGCTATAGATTCCAAATTGCGAAGTTCCAATCATACAGAAAACTACAGAATAATTCCTAAAACATGGAAACATTTACACACATAGTCCA

TT
