# Supplementary material for: Chromothripsis during telomere crisis is independent of NHEJ, and consistent with a replicative origin
Source: HighWire-hosted journal article supplement (doi:10.1101/gr.240705.118), 2019-03-14
Supplement: Supplemental_file_1.zip [file contig.3.DB93_length_759_mean_cov_7.70750988142.docx]

**DB93_length_759_mean_cov_7.70750988142**

ATTTTAAATAGGTTAGAGATGTTTTTAAATCCTATTTGAAACTCATTAACAAAACCATTCCTGTGCAATAGCCAAATTTTTATGAGGAG
 >chr3:7184509-7184658 + E=8e-75
AAAAGAATAATAAGATGACAATATGGTCCTGTGATACAGATTAAAAATATTTTAGTT|TTC|CCAAGACTCTTCCCCTTGCCACTTGCA
 >chr3:7495032-7495389 + E=6e-
ATGACAGTGGCAAACCCTAGGTTGTTTTGTCTGGGCTTCTGATGGTCCGGCTATAAACTGGAATTTTCACAATCTCCTCCTCAGGTTTG
203
ATTAATTTGCTAGAGCAACTCACAAAACTCAGTAAAACACTTACTTAAATTTATTACAAAAGGTATTTTAAAGGACACAAATAAACCTC

CAGATGAAGAGATCCTAGGGCAAAGTCTGAAAGGGTCCTGAGAGTAGGAGTTTCTGTCCTCAGGGATTTGGGGTGTGCTGGCCTCCCCT

GCACAAAGATGAGTTCTTGCTCACTTTCCTGTCAGCCTCCATGTGTTCAACTCTGAACCT|AAAT|ATTTGATGCTTGAATTGGCCAGT
 >chr3:4491252-4491504
TGAGATTTATAAGCACATTTGACCCCTTAGTGGAACTAGAATGTGTCAGAATGTGAGCAAACAGTGCTATTTAATTCGTTTAGCTAGAT
- E=9e-140
TCAGGACAAAGGACAAAGATTGATTATGTAATCTCACACGTACAGAATACTATTTCCCAGAGTCATTTGTGATACTTGGGGAAATGTAT

TTCCTTCAAGAACAGTCACGTTCTCAAAAGCTAATCTTGTTCAGTCTGCAT
