# Supplementary material for: Chromothripsis during telomere crisis is independent of NHEJ, and consistent with a replicative origin
Source: HighWire-hosted journal article supplement (doi:10.1101/gr.240705.118), 2019-03-14
Supplement: Supplemental_file_1.zip [file contig.3.DB95_length_229_mean_cov_5.78602620087.docx]

**DB95_length_229_mean_cov_5.78602620087**

TTTCTGGG|TGTGTAGTAGTCTATGATATATATATATATATATATATA|TATAT|ATATATATATATATATATATATATATATATATAT
 >chr12:87880579-87880623 - E=3e-06 p=0e+00 >chr14:46954933-46955080 + E=1e-66
ACACTTTTTTTAAATCTAGTCTACCATTGATGGGTATTTAGGTTGATTCCATGTCTTTGCTGTTGTGAATAGTACTACAACGGACATAT

GCATGCATGTGTC|TTTAT|AGTAGAATGATTTATAATCATTCTACTATATACCCA >chr4:33310214-33310255 - E=2e-07
