# Supplementary material for: Chromothripsis during telomere crisis is independent of NHEJ, and consistent with a replicative origin
Source: HighWire-hosted journal article supplement (doi:10.1101/gr.240705.118), 2019-03-14
Supplement: Supplemental_file_1.zip [file contig.3.DB96_length_359_mean_cov_6.85793871866.docx]

**DB96_length_359_mean_cov_6.85793871866**

GCCATGAAAGCAGAAGGCCGGGGTGGCGGGGGGGGAGGATTGGGAGCCCCGGCCCACAAGCCG|GGGCAACGGGCGAAGACCCCGTC|A
 >chr1:9471744-9471794 -
AAAAAAAAAAAAAAAAAAAAAAAAAA|AATTAGCCAGGCATGGTGGCACACACCTGTAGAAACTACTCAGAAGGCTGAGGTGGGAGAAT
 E=1e-06 p=0e+00 >chr13:98252511-98252668 + E=4e-83
CACTTGAGCCCTGGAGGCAGAGGTTTCTATGAGCCAAGACTGCACCACTGCACTCCACCCTGGGAAAC|GGGCGGCAGCCATCACTACA
 >chr2:142418009-14
GCTCCAGTCTGGCAGTTCCCCCCCGCTGGTGCCGCGGAAACTGGGCAGTTTGGACCCAGGAAGAATTCCCCAGGGTGTACCACAGCAGC
2418124 + E=9e-58
TGTGGC|N
