# Supplementary material for: Chromothripsis during telomere crisis is independent of NHEJ, and consistent with a replicative origin
Source: HighWire-hosted journal article supplement (doi:10.1101/gr.240705.118), 2019-03-14
Supplement: Supplemental_file_1.zip [file contig.3.DB101_length_964_mean_cov_6.06846473029.docx]

**DB101_length_964_mean_cov_6.06846473029**

ATTTTTGTATGTTTAGTAGAGACGAAGTTTCACCATGTTGGCCAGGATGGTCTCAATCTCTTGACCTCGTGATCCACCCGCCTCGGCCT
 >chr19:35296267-35296685 + E=2e-239
CCCAAAGTTCTAGGACTACAGGCATGAGCCACCGTGCCCAGCTGCTACCTTTTTTTCTCTCACCCTCAACATTAGAAAATCCAGCATTC

AGCCCTATTTTTAAAAAAGGTCTGGAATCCAGCCACTTTCTCCATTTCCAGATACCACCAACACTTACTTAGATTATTGCAGTAGCCCC

ATCCATGATCTTCCTGCCTCCTCCCTCACTCTCAAAATTTGTTCAGTCTGCAGCCAGAGGGAGCCTATTAAGACCTGAGTCATGTCACC

TCATTGCTCCTATGCCATTGCTCCCATCAACTCCAGAAACCACCCAACTTCTCAGACTG|CCA|AATGGAGTTTGTTCCTGGAATTCAA
 >chr19:35303537-35303832 +
GGCTGGTTTCATATTTAAAATAAATCAATGTAATTTACCACACTAAGAGAATAAAGAAGAAAAGCCATGTAAGTATCTCAAAGAGGTGG
E=2e-165
GAAAAGTGATTGACAAGATTTAATTGCTTTTCAAAAAACAATATCTCAGCAAAAGTAGGAATTGAAGGAAATTTCTTTTGTCTCAAGAC

AAAAGCAGAGCTATGAAGTAATCATAAGGAATTATGCCTTGAGACACACAGCTTTTGTACTAGAGTGGATCCTGCACCCAACTGATG|A

G|AAACCACCCAACTTCTCAGACTGCCATTCCAGATCTGACCCCTACTCTCCTGCTAGCAAGAAAGAGAGGAGATCTGTGATTCTCTGA
>chr19:35296657-35296913 + E=5e-139
ACACTCCCTTCTAAGCCTTACCTTCAAGCATTTGGAGATGGTGGTACCTGTGCTTAGGATAACCTTCCACACCTCATCCTATTGGTTGC

TAGATATACATAGGAACTATTATATATACTACCTCTGGCCGAGGACCATGGGCTTGGGGTTTCTCAAGCAACCCCAGT
