# Supplementary material for: Chromothripsis during telomere crisis is independent of NHEJ, and consistent with a replicative origin
Source: HighWire-hosted journal article supplement (doi:10.1101/gr.240705.118), 2019-03-14
Supplement: Supplemental_file_1.zip [file contig.3.DB102_length_343_mean_cov_4.81049562682.docx]

**DB102_length_343_mean_cov_4.81049562682**

CACGACGCTCTTCCGATCT|CCACAATCCAGAGAAAACGGGAGGAAAA|CAATCCAGAGAAAA|CGGAAATGAAGGAGATGAGAGGCTG
 >chr7:152147770-152147798 + E=2e-05 p=0e+00 >chr7:152147813-15214
ACTTGGATAGTGGAGGCTGGGACTGAGCCTTGGGAACTGCTCATCCATTTGGGCTATATGTAGGCCAGTCATGGTGGCTCATCACCTCT
8004 + E=1e-100
AATCCCAGTAGTTTGAAAGGCCAAGGCAGGCGGATCCCTTGAGGTTAGGAGTTTGAGACCAGCCTGGACAGCGCAC|T|TTTTTTTGAG
 >chr7:1521
ACGGAGTCTTGCTCTGTCACCCAGGCTGGAGTGCAGTGGCGCGATCTCGGCTCACTGCAACCTCCGCCTTCCACGTTCAAC51239-152151331 + E=6e-35
