# Supplementary material for: Chromothripsis during telomere crisis is independent of NHEJ, and consistent with a replicative origin
Source: HighWire-hosted journal article supplement (doi:10.1101/gr.240705.118), 2019-03-14
Supplement: Supplemental_file_1.zip [file contig.3.DB103_length_482_mean_cov_5.67842323651.docx]

**DB103_length_482_mean_cov_5.67842323651**

GGCGTGAGCCACCGTGCCCCACCTTTAATTAACATTTCTGTTAGTGTTTT|TTTTTATGATTCGGCGACCACCGAGATCTACACAGGCG
 >chr3:142233162-142233212 - E=2e-18
GAGACACTCTTTCCCTACACGACGCTCTTCCGATCT|AATTAGCTGGTATGGTGGCGGGTGCCTGTAGTTCCAGATACTCGGGAGGCTG
 >chr3:142232964-142233115 + E=9e-50
AGGCAGGAGAACCACTTAAACCCGGGAGGCGGAGGTTGCAGTGAGCCAAGATGGAGCCACTGCACTCCAGCCTGGGCAACAAAGCAAGA

CTCCGTCTC|AAAAAAAAA|AAAAAAGAAAGGTAAATTAAAAACAAAAATTGTAAATTTTAAATATACTGTAAACATTTTCTTGGAACA
 >chr3:142233655-142233863 + E=1e-113
CAGAGTACCTTTTGTCTATCCAGCATGTAAAAATTTCTCATTAAGGAAATAGAAATATACCTGTTTTTCTATGAAAATTCATTGTAAAA

ATCTTTATTTTTATTTTAGAGAAAGTTCAGATAATATAACT
