# Supplementary material for: Chromothripsis during telomere crisis is independent of NHEJ, and consistent with a replicative origin
Source: HighWire-hosted journal article supplement (doi:10.1101/gr.240705.118), 2019-03-14
Supplement: Supplemental_file_1.zip [file contig.3.DB103_length_547_mean_cov_5.16270566728.docx]

**DB103_length_547_mean_cov_5.16270566728**

AGGCATAATTTTTTTCAGTTCATGCCTGGTTAAGGATAAAATATATGACTGATTTATGGACTAGGTTATATTTTTTGAGGAATGGGGAA
 >chr1:114504036-114504283 + E=5e-137 p=9e-03
AAGCATTCTAAATAAGAAGGTAACTTAGATTATAAATTATTGAGCTTTTCGTAATCTTTCTTATCTAATTCACTAAAAGTTATACTTAA

GCCTTTGCTTTTAAAGATTAGAATTTTAAAAACAAGTTTTTTTTCCACCTAGTGGATTAAAAAGT|GAAT|CAAGCCTTTGATCAGTTT
 >chr1:114430644-11443
AATAGGGAAAC|TA|TTGAGCCCAGGAGGTGGAGGCTGCAGTGAGCTGAGATCACACCACTGCACTTGAGCCTGGGTGACACAGTAAGA
0677 + E=3e-08 >chr1:114428754-114429032 + E=3e-141
CCCTGTCTGAAAAAAAAAAAGATACTATACTTTGCCAAGAATAAAGTGTTATAAATGTGCTCTGTGCACACTAAGCACAACAGCTGTGA

TGAAGACCAAGTAGAGACAAACTGAAGGTTCATCAGCCTATGCCCAAAATTTTCCATCTCTGTACCACTTAGGTTTTAGCAATTGGAGA

ATTCTTGCTATACTTCC
