# Supplementary material for: Chromothripsis during telomere crisis is independent of NHEJ, and consistent with a replicative origin
Source: HighWire-hosted journal article supplement (doi:10.1101/gr.240705.118), 2019-03-14
Supplement: Supplemental_file_1.zip [file contig.3.DB104_length_455_mean_cov_13.1868131868.docx]

**DB104_length_455_mean_cov_13.1868131868**

AAAAACAGGTGAGCGAGAGTGGGAATGG|CATAAGTAAGTGCAAGGGGAGGTACTATGCCTGGATGTGCATGTAGGCCAGATTTATGTT
 >chr4:191033980-191034180 + E=9e-97
ACTGTCCACCCAAACATTTCAGTGGAGTAAAGAATAACTAGACAGCATTGCTGCCAACATGTCTCACCTCCCACCATAGGGTGGTTTTC

CTCCTACCTCAGAATTGAACAGGTGTACAATCGGGTTTTATACCGAGAC|AT|TTTGGGGGTATTCCAAAAGATACATGTTATGAATGG
 >chr7:112601878-112602056 + E=9e-88
AATCGTGTTCTTCCCTTCCCCAAATTCATTTTGTGCTGCCCAATCCCAATGTATTTGGAGAAGAGCCCTTAAAAAAATCATTAAGGTTA

AATAAGGTCACAAGGGTAGAACCCTAATCTCATAGGACTGATGTCCTTAT|CCCGGAGGTGCCGACCGAGACGGGGACGCGGCGGGTCC
 >chrUn_gl000220:119733-119785 - E=1e
GGCTCGTCCCGACG-19
