# Supplementary material for: Chromothripsis during telomere crisis is independent of NHEJ, and consistent with a replicative origin
Source: HighWire-hosted journal article supplement (doi:10.1101/gr.240705.118), 2019-03-14
Supplement: Supplemental_file_1.zip [file contig.3.DB106_length_765_mean_cov_44.2784313725.docx]

**DB106_length_765_mean_cov_44.2784313725**

GAGAAACACAATCTAAAAT|AAAAACAGAAAACTGTGCGGGCGCGGTGGCACATGCCT|ATCATCCCAGCTGCAAGGAAG|GCTGAGGC
 >chr8:33440007-33440045 - E=5e-02 >chrUn_
AGGAGAATCGCTTGAACCTGGGAGGCGGAGGTTGCAGTGAGCCGAGATCGCGCCACTGCAACCCAGCCTGGGCGACAGAGCGAGACTCC
gl000220:145413-146067 + E=0e+00 p=8e-03
GTCTCCAAAAAATGAAAATGAAAATGAAACGCAACAAAATAATTAAAAAGTGAGTTTCTGGGGAAAAAGAAGAAAAGAAAAAAGAAAAA

AACAACAAAACAGAACAACCCCACCGTGACATACACGTACGCCTCTCGCCTTTCGAGGCCTCAAACACGTTAGGAATTATGCGTGATTT

CTTTTTTTAACTTCATTTTATGTTATTATCGTGATTGATGTTTCGAGACGGAGTCTCGGAGGCCCGCCCTCCCTGGTTGCCCAGACAAC

CCCGGGAGACAGACCCTGGCTGGGCCCGATTGTTCTTCTCCTTGGTCAGGGGTTTCCTTGTCTTTCTTCGTGTCTTTAACCCGCGTGGA

CTCTTCCGCTCGGGTTTGACAGATGGCAGCTCCACTTTAGGCCTTGTTGTTGTTGGGGACTTTCCTGATTCTCCCCAGATGTAGTGAAA

GCAGGTAGATTTGCCTTGCCTGGACTTGCCTGGCCTTGCCTTTTCTTTCTTTCTTTCTTTATTACTTTCTCTTTTTCTTCTTCTTCTTC

TTCTTCTTCTTCTTCTT|CTTCTT|TTTTTTTGAGACAGAGTTTCACTCTTGTTGCCC >chr19:50809511-50809550 - E=1e-11
