# Supplementary material for: Chromothripsis during telomere crisis is independent of NHEJ, and consistent with a replicative origin
Source: HighWire-hosted journal article supplement (doi:10.1101/gr.240705.118), 2019-03-14
Supplement: Supplemental_file_1.zip [file contig.3.DB107_length_554_mean_cov_6.76173285199.docx]

**DB107_length_554_mean_cov_6.76173285199**

GCAAGGAATAAAAATACCAGTTATGTAATAGTCATTTGCCTTAGTCATGCAGCCCTGCCGGAGTGCTGTTCGAACAGAAAGATGATTAA
 >chr15:67334310-67334619 + E=2e-174
GTTAAACACTGCATATTTATTCCCCTGCGGTCACCCTAATTGGTTCTGCCGCTGTAATTGATTTGACAGGTTATTTTTACTCAGAATGA

GCTGGGTTCCTCTGCTGGCTTGCAGATTTGCTCTTGCTCTTCGAGTCCAGGCCGGCAATTGTCCAGATGGCCAGATGTGGCTGATTTCT

ACCTGAGGAGGGGGAGGGGGGTCCTCAACCTAGCCTGGGGAG|T|CATCTCTACTAAAAACACAAAAATTAGCTGGGCATGGTGGCAGG
 >chr1:44381618-44381747 + E=6e-60 p=1e-03
CACCTGTAATCCCAGCTACTCAGGAGGCTGAGGCAGGAGAATTGCTTGAACCCAAGAGATGGAGGTTGCAGTGAGCTGAGATCAT|TGC

ATCGCTTGAACCTGGGGACAGAGGTCGCAGTGGGCCGAGATGGCACCACTGTACTCCAGCGTGAATGACAGAGTGAGACTCTGTTTAAA
 >chr1:44383331-44383445 - E=6e-51
ATATATATATATAATATATATTA
