# Supplementary material for: Chromothripsis during telomere crisis is independent of NHEJ, and consistent with a replicative origin
Source: HighWire-hosted journal article supplement (doi:10.1101/gr.240705.118), 2019-03-14
Supplement: Supplemental_file_1.zip [file contig.3.DB108_length_634_mean_cov_5.91482649842.docx]

**DB108_length_634_mean_cov_5.91482649842**

AGAAAAAAAACACATGTATAAATTTAAAGTTTGTTTTGAAAAATTACTTCATCCATGTACTGTCCAGCTCATAAAAACAAAACTTCTTC
 >chr7:130626883-130627198 + E=8e-178 p=0e+00
CAGCGAAACGGGACACTTTGACCTTGTTTACTGCAGTGTTTGGAAACCGCTGTCTCGTAACTCCTGACATCACCGGTGGTGCATTAGCA

CCTGGACTGCTGTTGGCTGCACATGCTGATACCCCAACTCTCTTGAATCACCCGTGGCTGAACAAATACTCACAGAACAGTAAGGATAG

TGGCATTAGCATTAAACCCACAAAACTCACAAGACCTTTTAGAAGTGT|ATATATATATATACTTTA|AGTATATATAGAAGTGTATAT
 >chr15:83898785-8389
ATATAC|ATGCTAGAATCGC|TGTCTCCTAACCCTCCCCTTGCTGTTGTTCTTGGAATGGGTACCTTATTCATGGCCTCCTTACATAGA
8812 - E=2e-01 p=1e-02 >chr7:130573426-130573687 - E=3e-142
GGGAGCAGATTCAGGACAGAGGCTCTGCACGCTCCTGGGTCCCTCCTAAGCGAGCACTCCCCTCCACTGCTCCTCCTGTTCGGCATGCT

AGATTTTCTGTGCACTTGCAGTCATACGGAAACTGGCTTCCTTCTTAGCTGTGCGTGTGAAAGTCACCCCAGTGTTTCACCTGCAGTGT

GAGTGTAATTTGGGG
