# Supplementary material for: Chromothripsis during telomere crisis is independent of NHEJ, and consistent with a replicative origin
Source: HighWire-hosted journal article supplement (doi:10.1101/gr.240705.118), 2019-03-14
Supplement: Supplemental_file_1.zip [file contig.3.DB111_length_491_mean_cov_5.69246435845.docx]

**DB111_length_491_mean_cov_5.69246435845**

TTTCAACTATGAATTGATTAACATCTTTTTCCCTTGATAAGAAATGAAAGACTACAGTTAGTTGTCTGATATGTACAAATTAACTTGAA
 >chr5:155612561-155612858 + E=3e-164 p=0e+00
GTTAAGGATAATCTGGCATCTGACTTTCCCCAAGGAAACCTTGCCAGAAACAGCGTGATTTATTTTTAACACTTTTCACAAAAACCCTC

CCCTGTGGGACCTCAACAAATGTCACTTCTGTTGTGAGACTTTTAAAAACAGTGGGCTGTGATTTTTACAAACTTATAAATATGGCCAT

ATATATATGTGTGTGTATATATATATATAT|GTGTGTG|TATATATATATATGTATATATATATATATACACACACATATATGTATATA
 >chr17:49926565-49926623 - E=3e-20
TATATATA|T|AGAGAGAGAGAGAGAGAGAGAGATGTCCATGTCTCCCATATGCTTTCTCTACTGTGTTCATAATTGCTCTGTTTCAGA
 >chr5:155612872-155612992 + E=1e-36
ACTCTTCATGACTCTGGGTACTTTTGATCGGCACCATAGATC|AGTGTTCG
