# Supplementary material for: Chromothripsis during telomere crisis is independent of NHEJ, and consistent with a replicative origin
Source: HighWire-hosted journal article supplement (doi:10.1101/gr.240705.118), 2019-03-14
Supplement: Supplemental_file_1.zip [file contig.3.DB111_length_525_mean_cov_6.82666666667.docx]

**DB111_length_525_mean_cov_6.82666666667**

CATGTACACACACAGCACACATACACATAGCACAAGTGTATACACACAGCACAAGCATACACAGACAGCACAGGTGCACACACACCACA
 >chr8:49291304-49291496 - E=6e-104
TGCGTACACACACACTTGTATACATACACTGTGCATTTCTCTCAGTGAACATTCACCACATGCCTTGGGTGCATGCAGTATTATGCTGC

ATGAGATAGGG|TCC|ATTAGAAAGAGGGTGGAGGCTGGTCTACACACCAGGGCTTTCAGTCTGTAGTTGA|G|TTTTCCGTAGGTCCC
 >chr8:49290298-49290357 + E=7e-24 >chr8:49291030-
ACCACTCATCAGAGTCACAGAGCAAAGCTGCATACCTGGGTGCCAGACGCCAGCCACTCTCCACCGGCACTGCGTTGGGGGTGAGCTTC
49291308 + E=1e-155
TTAACAGGTGGTGCAAACATGAATGCTCTCCACCTGCGGGCCCCAGCTACACCTCAGAGCAATCTCGGAGCCTTTATAAATAAAAATGT

CTCAAGTCCTCACTCGATTTGGTAGATTAGGGAGTCTCTTCAAAATTCCTTCAGTGCTTTGAAGGTGAAGCCAGGTTTGGGGAC
