# Supplementary material for: Chromothripsis during telomere crisis is independent of NHEJ, and consistent with a replicative origin
Source: HighWire-hosted journal article supplement (doi:10.1101/gr.240705.118), 2019-03-14
Supplement: Supplemental_file_1.zip [file contig.3.DB111_length_650_mean_cov_8.53846153846.docx]

**DB111_length_650_mean_cov_8.53846153846**

CCTGATATATATTTCAGGAAAATATAACAAAGAATCAATTTTGTAGAATTCAGTTAGCTAGGGGTTAAATTCTACCCTAGCAACAGAAA
 >chr5:160998385-160998669 + E=4e-159
CTTTACAGCTGCTGTCAGAAACAGTAATTACTCTGGTCAATATTCTCTAAGAAACTCCAGCTGTCTTATCAAGCTTGCTTTGTCAGAAA

GACTCCTTTCCTGTTAGGGGCATCAGTTGTAGAATAACCATGATGGTGCCAATGAAAGAGTTGAAAAAAATGTTTTAGAAGCCATAATG

TGGCATATATATATA|TA|AATTTAAAGTTCTGATAATATCT|ACT|AGAGCTAATTATTACCATCCTCATTTTACCTAAAATAAAACT
 >chr5:160998700-160998728 + E=4e-05 >chr5:160999261-160999604 + E=1e
TCAACTTTTTAACCTGAGTTAATTTCCATGATCGATGCTTAAATACTTTTTTAGCATCGTCCTATGCCATGCTTAGACACTGAGACCTT
-191
TTTTAATTCTCAGACTTACCAAGCCTGTTCTTAACTTAGGCACTTTGAGCTAGATGTTTTTGGGGTTTTCTTTCTCACATTATTGTTCC

CTCTGTCCATGTTGCCATCTCCTGATCTTTGTATAGCTGGCTCCTGCTTACAATTACAATTTCATCTTAAATGCCTCATCTCCCAAGGG

GTCTCACTTGATCATCATACATAAGGTTGTC
