# Supplementary material for: Chromothripsis during telomere crisis is independent of NHEJ, and consistent with a replicative origin
Source: HighWire-hosted journal article supplement (doi:10.1101/gr.240705.118), 2019-03-14
Supplement: Supplemental_file_1.zip [file contig.3.DB112_length_792_mean_cov_7.52398989899.docx]

**DB112_length_792_mean_cov_7.52398989899**

TCACCCAGGCTGGAGTGCAATGGTACCTGGGATTACGGGCACACCACCACACCCAGCTAATTTCTGTATTTTTAGTACAGATGGGGTTT
 >chr7:75311383-75311491 + E=4e-53
CACCGTCTTGGCCAGG|TTG|TCTCCTGGGAAATGGGAGTATTAATTCCCTCTGGGCTGCTGTTTTTTGTTTTGTTTTGTTTTGTTTTG
 >chr7:75311512-75311974 - E=3e-240 p=0e+00
TTTTGTTTTGTTTTCTGTCTGTAAAATGAGGATGTTGGCCAGGCACCGTGGCTCAATCCCGTCATCTCAGCACTTTGGGAGGCTGAAGC

AGAAGGATGGCTTAAGCCCAGGAGTTCAAAACCAGCCTGGGCAACATAGTGAGATCCCACCTTTAGAAAAAAAAAAACTAGCTGGCTAT

AGTAGCATGTAGCCTCCTGTAGTCACAGCTACTGAGGAGGCTGAGGCGGGAGGATCACTTGAGCCCAGGAGTTCGAGGCTGCAGTGAGC

TATGATCGCACCACTGCACTTCAACCTGGGTGACACAGCAAGACACTGTCTCTTAAAAAAAAAAGATGATAGGCTGGTGGGGGTGACTC

ATGCCTGA|AATCCCAGCACTTTGGGAGGCCAAGGTGGGTGGATC|GCCGGAGCTTAGGAGTTTGAGAACAGCCTGGCCAACATGGTGA
 >chr7:75313508-75313760 + E=1e-136
AACCGTGTCTCTACTAAAAACACAAAAAATTAGCCAGGTGTGGTGGCGCGCAACTATAATCCCAGCTACAGGGGAGGCTGAGGCAGGAG

ACTAGTTTGAACCCGGGAGGCAGAGGTTGCAGTAAGCCGAGATTGCATCACTGCACTCCAGCCTGAGCAACAGAACAAGACTCC
