# Supplementary material for: Chromothripsis during telomere crisis is independent of NHEJ, and consistent with a replicative origin
Source: HighWire-hosted journal article supplement (doi:10.1101/gr.240705.118), 2019-03-14
Supplement: Supplemental_file_1.zip [file contig.3.DB112_length_1123_mean_cov_14.5120213713.docx]

**DB112_length_1123_mean_cov_14.5120213713**

CTGGTTTCAACTTCCACTTTGATCTCCAGCCCTAACCTTCTTTTCTGAGCTCCATACCTTATAGCCAAAAGTCTGCAGGACATCTCTAC
 >chr12:81500712-81500923 - E=7e-115 p=3e-02
TTAAAAAAAATAACCTGTCTAAAATTATACTCATTTCACTCCACCTCCACCCCCACCCCCACAGCTCCATCACAACTGCAAACTTGCTC

CTCCTCCTGTTTTCTAAATTTCAAGGAACTAT|G|AGTCTCCACTCATGGAGGAAGGGCCGAGGAAAGAGACAAAATACTTTTGCTAAG
 >chr12:81501789-81502344 + E=6e-222 p=0e+00
AGTAGGATGCTGGGAAGAGGTAATATTTTTGAACAAACATGAGATCAGTCACAGGGGAATTCAGAATCATTATATAAATTAATTCTGTG

CTATGCTGTAGGTAATCAAATTTGCTATTATTGAAATACATAGGGTCATTTGACTTTGATTAAATGATTCTTCCTCCTGTTGCTTTCTG

TGGCTATTATTATTATTATTATTAATTATTATTATTATTATTATTATTGTTATTTTGAGACAGAGTCTCGCTCTGTCGCCCAGGCTGGA

GTGCAGTGGCGTGATCTTGGCTCACTGCAACCTCCACCTCCTGGGTTCAAGCAATTCTCCTGCCTCAGCCTCCCGAGTAGCTGGGACTA

CAGGTGCCCGCCACCACGCCTGGCTAACTTTTGTATTTTTAGTAGAGACAGGGTTTTCACCATGTTGGCCAGGATGGTCTTGATCTCTT

GACCTCATGATCTGCCCCCCTCGGCCTCCCAAAGTGCTGAGATTACAGGCGTGAGCCAC|AGCACCTGGACAAT|TTTTTTTTTTTTTG
 >chr4:2724997
AAGCAGAGTCTAGCTCTGTCGCCCAGGCTGGAGTGCAGTGGCACAATCTCAGCTCGCTGCAACCTCCGCCTCCTGGGTTCAAGCAAATC
-2725313 - E=6e-154
TCTGCCTCAGCCTCCCGAGCAGCTGGGATTACAGGCACCCACCACCACATCTTGCTAATTTTTGTATTTTCAGTAGAGAGGGGGTTTCA

ACATCTTTGGCCAGAATGGTCTTGAACTCCTGACCTCATGATCCACCCGCCTTGGCCTCCCAAAGTGGGATTACAGGCATGAGCCACCG

TGCCTGGCCTAAAGGATACTGTTTTTTGGTTTGAG|GCGGAGTGTCGCGCTGTCGCCCCG
