# Supplementary material for: Chromothripsis during telomere crisis is independent of NHEJ, and consistent with a replicative origin
Source: HighWire-hosted journal article supplement (doi:10.1101/gr.240705.118), 2019-03-14
Supplement: Supplemental_file_1.zip [file contig.3.DB113_length_281_mean_cov_6.48398576512.docx]

**DB113_length_281_mean_cov_6.48398576512**

AAATACAAAAATTAGTTGGGCATGGTGGCAGGCACCTGTAATCCAAGCTACTCTGGAGGCTGAGGTGGGAGAATCTTGAAACCAGGAGG
 >chr9:76547363-76547522 - E=2e-84
TGGAGGTTGCAGTGAGCAGAGATTGTGCCACTGCACTTCAGCCTGGCAACAGAGTGAGACTCCATCTCAA|CAA|CAACAACAACAACA
 >chr5:1044584
ACAACAACGACAACAACAAAAAAGCAGT|GAAGGAAAC|TGCCAGAATCATAGAGCTAAAAGTTGGTAGAATCAGGAATGAAATCTAGA
21-104458463 - E=6e-08 >chr10:31127354-31127423 + E=2e-13
ACCATAAGACAGCAAAGC
