# Supplementary material for: Chromothripsis during telomere crisis is independent of NHEJ, and consistent with a replicative origin
Source: HighWire-hosted journal article supplement (doi:10.1101/gr.240705.118), 2019-03-14
Supplement: Supplemental_file_1.zip [file contig.3.DB113_length_473_mean_cov_8.42917547569.docx]

**DB113_length_473_mean_cov_8.42917547569**

AAATACAAAAAATTAGCTGGGCGTGGTAGTGTATGCCTGTAGTCCCAGCTACCTGGGAGGCTGAGGCAGGAGAATTGCTTGGGCCCCGG
 >chr10:13279286-13279459 + E=2e-89
AGGCAGAAGTTGCAGTGAACCGAGATCATGCCACTGCACTGCAGCTTGGGCTACAGAGTGAGACTCCATCTAAAAAAAAAAAAA|TTGG

CAG|TTTGTTGTTGTTGTTTGTTTGTTTGTTTTTGTTTTTGTTTTTTTTTT|TG|AGACCCTGTCTCAAAAAAAAAAATCCACAACAAA
 >chr10:12359174-12359221 - E=1e-16 >chr10:13267977-13268225 - E=3e-1
AATAAAAAACTGAGGCTTAGAAAGGATACATGTATACTCAAGGAGACAAGGCTAGTAGATAGCCCTAGCATTAGAACCCCAAGGCTTAT
26
TTGCCAGCAAAGCTCCTGTTCTTGTAAATCAAGGATGAGCAAATGCATAGAGGTCTTGGAGAGCTTCTTTGATCCAGGAATTGGCCCCC

GGATGGAGTGAGTGAGAAAGATAAAGCAGAGT
