# Supplementary material for: Chromothripsis during telomere crisis is independent of NHEJ, and consistent with a replicative origin
Source: HighWire-hosted journal article supplement (doi:10.1101/gr.240705.118), 2019-03-14
Supplement: Supplemental_file_1.zip [file contig.3.DB113_length_588_mean_cov_13.7329931973.docx]

**DB113_length_588_mean_cov_13.7329931973**

AATCTTGAAATTTGGAGAAAGACCAAATAAATAAACAGGGCTAGGTGCAATGGCCCACGCCTATAATCCCAGCACTTTGGGAGACTGAC
 >chr10:13269397-13269587 + E=1e-99
ATGGGCAGATTACTTGAGGTCAGGAGTTCGTGACCAGCCTGGCCAACATAGTAAATCCCCATCTCTACCCAAAATACAAAAATTAGCTG

GGCATAGCGGTG|AAACCCTGTCTCTACGAAC|CTGCAAGGCAGGTTCATTCTCATCCTGGTTCCTGTGTCATCTCTGCAGATGTGTTC
 >chr10:12953101-12953284 + E=2e-95
CCTTGTCACCCCATAAGTCACCTCTCCTAATGAGGCTGTTGCATCACCTGCTTCTCTTCAGTGCCTTATAACATTGTTGGATTTCCTTA

CTAATGGCTAATTTGTTCTTTCTTCCACTAGACTAAAA|TCCCAGGTTTGCGCCATTCTCCTGCCTCAGCCTCCCGAGTAGCTGGGACT
 >chr10:12316401-12316597 + E=3e-106
GCAGGTGCCCGCCACCACGCCCAGCTGATTTTTTTGTGTATTTTTTTAGTGGAGATGGGGTTTCACCGTATTAGCCAGGACGATCTCGA

TCTCCTGACCTTGTGATCTGCTCGCCTCGCCCTCCCAAAGTGCTGGGATTACAGGTG
