# Supplementary material for: Chromothripsis during telomere crisis is independent of NHEJ, and consistent with a replicative origin
Source: HighWire-hosted journal article supplement (doi:10.1101/gr.240705.118), 2019-03-14
Supplement: Supplemental_file_1.zip [file contig.3.DB113_length_771_mean_cov_11.1893644617.docx]

**DB113_length_771_mean_cov_11.1893644617**

GTCACCACCAGGCCTGCCTTACAAGACCTCCTGAAGGAAGCGCTAAACATGGAAAGGAACAACCGGTACCAGCCTCTGCAAAATCATGC
 >chr4:150838502-150838738 + E=5e-100
CAAAATGTAAAGACCATCGACACTAGGAAGAAATTGCATCAACTAACGAGCAAAATGACCAGCTAACATCATAATGACAGGATCAAATT

CACACACAACAATATCAGCCTTAAATGTAAAAGGACAAAATGTCCCAATTAAAAGACA|GAACAG|GGCTGGGCGAGGTGGTTCACGCC
 >chr7:7806933-7807055
TGTAATATCAGCACTTTGGGAGACTGAGGCAGGTGGATCATGAGGTCAGGAGATCGAGACCATTCTGGCCAATATGGTGAAACCCCATG
- E=2e-31 p=2e-02
TCTACTAAAA|TATA|TACAAAGAGACTTAGACTTCCACATAATAATATTGGGAGACTTTAACACCCCACTGTCAATATTAGATAGATT
 >chr13:85270598-85271001 + E=1e-224
ATCAAGACAGAAAATTAACAAAGATATTCAGGACTTGATCTCAGCTCTGGATCAAGTGGACCTGATAGATATCTGCAGAACTGTCCACC

CAAAAACAGCAGGATATAAATTCTTATTGGTGCCACATGGCACTTACTCCAAACTGATCACATAATTGGAAGTAATACACTCTTCAGCA

AATGCAAAAGAATTTAAATCATAACAAACAGTCTCTCAGACCACAGCACAATAAAATTAGAACTCAAGATTAAGAAACTCACTCAAAAC

CACACAACTACATGGAAATTGAACAACCTGCTTCTGAAGGACTCCTGGGTAAATAATGAAATT
