# Supplementary material for: Chromothripsis during telomere crisis is independent of NHEJ, and consistent with a replicative origin
Source: HighWire-hosted journal article supplement (doi:10.1101/gr.240705.118), 2019-03-14
Supplement: Supplemental_file_1.zip [file contig.3.DB113_length_1019_mean_cov_19.7674190383.docx]

**DB113_length_1019_mean_cov_19.7674190383**

CTGCCCAAAATGGCGAAACCTCATCTCTCCTAAAAATACAAAAATTAGCCAGGCGTGGTTGTGCACACCTGTAATCCCAGCTACTTGGG
 >chr10:12361921-12362294 - E=2e-212 p=0e+00
AGGCTGAGGCAGGAGAATCACTCGAACTGGGGAGGTATAGGTGGCAGTGAGCCCAGCCCGGGCGAAAAGAGCAAGACTCCATCTCAAAA

ACAAAAACAAAAAAGGAGCAGAGGAGACTCAGAAGTGTTTAGGGAATCGGGAGGAGGCCAGCCTGTTATGGTAAATAACAGGAACGGGA

AAGTAACCAGGGACCTGATCTCCAAGGAGCTTCAATTTTAGATGAAGGACTTTGCATTGTCTAGAATTATCTAGATAACAGGCTTTTGG

ATTGATTGATAATGGGC|ACATAGCAAAATCCCGGCTCTACACAATACAAAAAATTAGCCAGGCATGGTGGTGTATGCCTGTAGTCCCA
 >chr10:12956285-12956647 - E=1e-199
GCTGCTTGGGAGGCTGAGGCAGGCGAATCGCTTGACCCAGGAGGCGGAGGTTGCAGTGAGCCAAGGACACGCCACTGCACTTCAGCCTG

GGTGACAGAGCAAGACTCTGTCTCAAAAGAAAAAACAAAAGATAAAATCAGAAATGAAAGAGGAGAAATTACACTGATACCGCAGAAAT

ACAAATGACTAAAAAAGACTACCACAGACAATCATATGCCAACAAATTAGATAACTTACAAGAAATGGATAAATTCCTAGACACATACA

ACCTACTATGATTAAGTTATGAGT|T|GTGCTGGGATTACAGGTGTGCGTGAGCCACCATGCCTGGCCTGAGTTGTCTTTTTTTACTTA
 >chr10:12956706-12956989 + E=3e-158
GTCTAGCTAAAGGTTTGTCAGTTTTGTCTTTTCAAAAAACCAACTCTTTATGTTGCTGATCTTCTGTATTATTTTTCTACTCTCTCATT

TATTATTATTTCTTTCCTTCTAACTTTGGGCTTAGTTTGTTCTTCTTTTTGTAGTTCCTTGAGGTAACACTAGATGTTTACTTGGCAAG

TTCTTTTTTGATGCAGGCATTTATTGTTATAAACTTCTCTCTT
