# Supplementary material for: Chromothripsis during telomere crisis is independent of NHEJ, and consistent with a replicative origin
Source: HighWire-hosted journal article supplement (doi:10.1101/gr.240705.118), 2019-03-14
Supplement: Supplemental_file_1.zip [file contig.3.DB114_length_405_mean_cov_11.1209876543.docx]

**DB114_length_405_mean_cov_11.1209876543**

TAACCAAATTATTGTGAATTAAAATTCACAACTTATGGCATTAAATCAAAGATTACCAGGCATGCACAGAAATAGAAA|AAC|TTGTGA
 >chr20:62016290-62016371 + E=3e-37 >chr20:6
CCTCAAGTGATCCACCCACCTTGGCCTCCCAAAGTGCTGGGATTACAGGGATGAGCCACCACACCCAACCTCTGATAACATTTGAAATA
2016336-62016537 - E=2e-109
TCCTTGTCTATTACCTCTACATCTACATCAGTTTGGGGTCAGTTTCAATCAATTGATTTGGGGGCCACGTTTTTCTATTTCTGTGCATG

CCTGGTAATCTTTG|GCC|GCTGGATGCTGAATAAGCCAGGAAGAAGATCCGGCTAAATGTTGGCACATTCTAAAGTCTACGTGAGGCC
 >chr20:62017643-62017766 + E=2e-62
AGTCTGACCCTGGGAACCTCCATGAAGACATGGGCGTGGAGGGTCTGCCTTTT
