# Supplementary material for: Chromothripsis during telomere crisis is independent of NHEJ, and consistent with a replicative origin
Source: HighWire-hosted journal article supplement (doi:10.1101/gr.240705.118), 2019-03-14
Supplement: Supplemental_file_1.zip [file contig.3.DB114_length_640_mean_cov_6.796875.docx]

**DB114_length_640_mean_cov_6.796875**

AAAAAAGAAAAAAAAAATACAAAAGATAATAATATAAAAGATTCCAAAA|AAAACCAAAAAACAAAGACAGAAAGAAAGAAAGGAAAAA
 >chr14:27679260-27679623 - E=1e-200 p=
TTTGAGAAAAACAGCCACTACCTATTGAGAAAAGGAAAAAAAAAAAACACACACACACACAAATAAAATCTACCATGAATACATAAGAG
1e-02
AACAGACAGCAACCATGAAACAAGAATGAGATTCCTTGTCAAAGAAATATTCAAAAGTTTTAAAAGGTATTTTTATACATTAACATTTT

GATGATATGGCTGAAAACTCAGTAAGTGTTGAAAGAAAATGCTAAGGATATTTCCCAGACATTATGGCAAAGAAACAAGCAGATGAATA

GTAAATGAGGAAAGAGCAAAAAATTAGATGTCCTTATTATAAGGCCCTACATCC|A|TATATATATATATTAATATATATATATATTAA
 >chr2:170324426-170324478 + E=1e
TATTAATTATATATATATATA|T|ATTAATGTTTTTGTAGCAGAATCTTACTAAGTAGGTTCCAAAGTTTCTAAAAGTTTCTCCTTTGA
-02 >chr14:27678341-27678517 - E=4e-94
ATGCATTTCAAACACTATTTAGACAGTGTGGCAAAATATAGAACGGACTAATGGAAGCAAAGAAAGTTGATTGGATTACTAAATTGATT

TTAGAAAGTGGATAATAAGACA
