# Supplementary material for: Chromothripsis during telomere crisis is independent of NHEJ, and consistent with a replicative origin
Source: HighWire-hosted journal article supplement (doi:10.1101/gr.240705.118), 2019-03-14
Supplement: Supplemental_file_1.zip [file contig.3.DB114_length_693_mean_cov_5.19480519481.docx]

**DB114_length_693_mean_cov_5.19480519481**

ATTTATGAATAGGGACCAGAGAGCCCCTTCCATGTGACGCCTATGACAGCACCACATCAGCTTCAAGGAGAGGTGTCAGCAGAACGTAA
 >chr12:20293673-20293980 - E=7e-164
CTCATATTTCAAACCTCTCCCAGCTCTATAATCTCACAATCATTGTTCCTCTTTTTCTTCAAGGCCTCACCTTGAAACCAACCCAGTCC

AATTGTCCCATGGGTTCCTATCTTCAGAGAAAATTCTTAATCTCTCTATGAGGACTTAGAAGGTTATTTTCAATAATCTCTTTTGTCTT

TTACTTGCCAAATTTCTTATATTTCTTCTGTTTTTTTCT|T|CATGATAACACTTTGGATTTATATCTCAAAAAGTAACACGTTTTGAA
 >chr12:20291590-20291938 + E=1e-194
CTACTTTAACACTTCTATAAACTAAAAAACTTAGTAGTTTACAAAACCTTATTGCCTTATTTAACAGATACCCAAACTGAGTTAAAGAT

AAATTAAGTGACTTCCGCATGGTCAAACTGTGGTAGATTTAGCATTATTTGTTTTTCCTAACTCTGTTTCAACACCTTAGTATCCATTA

CCTGCCTTCTGAAAATAAAAGGATATGGCTACGAACTAAACACACTGAAGGTGAATGATATATTTTCTCCCCAGAAACTATTTGTATGA

TGTAGGGATTAGTAACAGGAAAACTAAAAT|TTA|AAGTAGTTCAAAACGTGTTACTTTTTGAGATATAAATCC >chr12:20291605-20291647 - E=2e-10
