# Supplementary material for: Chromothripsis during telomere crisis is independent of NHEJ, and consistent with a replicative origin
Source: HighWire-hosted journal article supplement (doi:10.1101/gr.240705.118), 2019-03-14
Supplement: Supplemental_file_1.zip [file contig.3.DB115_length_889_mean_cov_13.7457817773.docx]

**DB115_length_889_mean_cov_13.7457817773**

GGTTTCGTGGAGCAAGTACCACAGGGAAGGGGGGGGGAAGTGTGGGAAGTGGGTT|GGGGGGGGGGGGGGGGTGGGGAGGGGTGG|TGG
 >chrX:44141866-44141895 + E=1e-
GGGGGGGGGGGGGGGGGGGGGGG|GTGTGTGTGTGTGTGTGTGTGTGTGTGTGTGTGTGTGTGTGTTTAATGTACCTAATTCTGTAAAG
02 p=0e+00 >chr6:155115922-155116466 + E=0e+00
GATTTTAAGTGATTTTTTCAAAGTGGACACAATAAAATAAAAACAATATGCGTGCATGTGTTTTATAAAAGTAATAAAACAAGTTATTC

TGCTTTTTCTAGTCTTAGTTACTTACTTACATATTTATTTGGGGGGTGTGATGTTCTTTTTAAAAGGAACTCCTGTGACACCTGTTACT

CCGGCCAATGTGGTCCAAGGCTTACCTGATCCGTGGGTATCTCAGATAACAAATACAGATACACTTGCGGCTGTAGCTCAGATCTTGCA

AAGTCCTCAAGGCCAGCAGGTGAGCGGTTTTTCTGTTATATCAAGAATAATTTAGAATTTAATATTTTCCTAATGTATTACTTTGTAAC

ATACCACCTAGAGAATATGTGCTTTTTTTAGTTTTATAAAAATGGGACCATTATGTATACTTTGTTACTTACTTAAGTCATTTAATAGT

GCATCATGAATGCTTTCATGTCATTAAAAATT|AC|ATCATAGAGCTACCAATAACCTCACTGTTTCTCCTCGCCAAGGAAGACAAGCT
 >chr6:154236259-154236496 + E=1e-130
GTTGTGCTTTATTTCAGTGTAAATCACCAGGTCAGAAATCCATATGTACACATGTTATCATCCAGTCCACCTAAATGTCTGGTTTTTGT

TCTAACGCCTGTACTTTTCTTGAACAATTCATCCTTGCTCTTATTTTGTTGGTTTTGTTTTCCCCACACCAGGAATTTCAGTGTCAGTG

TATT
