# Supplementary material for: Chromothripsis during telomere crisis is independent of NHEJ, and consistent with a replicative origin
Source: HighWire-hosted journal article supplement (doi:10.1101/gr.240705.118), 2019-03-14
Supplement: Supplemental_file_1.zip [file contig.3.DB116_length_540_mean_cov_8.61111111111.docx]

**DB116_length_540_mean_cov_8.61111111111**

CCCCTTTACAAAATGTAAGAACAAGAAATGTAACAATAAAACAAATACAGTGGTGGGGAAGGAACAAGAGCAGGGGTCAGCAGTGTAAT
 >chr13:39960384-39960591 + E=4e-108
TCTTCAGACCCTGGAAACTCAAGGAGTACATTCTTTAGTCTACAAAAAAAAGGCTTGGTTGCATTCTAGTAAACCACACCTCCTATCAA

AGTGCTTTCTGGAAACTGAGGCACAG|AG|CCAGATTTCCAGTCACCATTTGTCTAAGAATGACACTGCTTTAGCCACAGGGAAGTCTC
 >chr13:39961967-39962058 + E=4e-43
CCACTGCTGCCTGTGACTAACGACAAGGGA|ACG|GCAACACCTTTCTAACCCCAGTAGTTAAGGGCATCTTAATTCTACCATTTCACT
 >chr13:39962644-39962886 + E=5e-134
TCTTTAGGACTCAGTTTTCCTTATCTGTAAAATGGGGGAAAATTATGAGGAGGGGGAGGTAACACCTTGAACATTTATTTTTATTTCTG

TAACAGTGACTTTATGAAAACAAAGTAGACCATCATTACATTAGGATGCACAGTGTTGTGGGAGAGATTTGCAAAACTTCCACTGGAAT

TGCAGGGCAG
