# Supplementary material for: Chromothripsis during telomere crisis is independent of NHEJ, and consistent with a replicative origin
Source: HighWire-hosted journal article supplement (doi:10.1101/gr.240705.118), 2019-03-14
Supplement: Supplemental_file_1.zip [file contig.3.DB116_length_575_mean_cov_8.82782608696.docx]

**DB116_length_575_mean_cov_8.82782608696**

TACTGGATATATACCCAAAGGACTATAAATCATGCTGCTATAAAGACACATGCACACATATGTTTATTGCGGCACTATTCACAATAGCA
 >chr9:28481902-28482140 - E=2e-128
AAGACTTGGAACCAATCCAAATGTCTAACAATGATAGACTGGATTAAGAAAATGTGACACATATACACCATGGAATACTATGCAGCCAT

AAAAAATGATGAGTTCATGTCTTCTGTAGGGACATGGATGAAATTGGAAATCATCATTC|T|TGACCTACAATGATTATAATAGCAACT
 >chr9:28479941-28480115 - E
CTTTGTAAACGTAAATGAACCTCACAGAAATCATAGCATTACATAATCTATCAAAACAAATAATAGCAATTTATTATGGTGGTTGAAAT
=5e-90
TTTGCTTAGGAAGTAACCCTATTTAAGTTTCTCTCAAAATGTACATATATATATATA|CACACAT|ACACACACACACACACACACACA
 >chr9:28479721-2847987
CACACACACACAGATGACATGGTTCCAGTAGTTAAGACATTCTTCAGTATGGTACTTATATGGGAGAAATAGTCATTATAGATAGGACC
8 - E=9e-83
AATGACTGTTCTTTAAAGGAACTAGACACATGTTCCTGAAATACA
