# Supplementary material for: Chromothripsis during telomere crisis is independent of NHEJ, and consistent with a replicative origin
Source: HighWire-hosted journal article supplement (doi:10.1101/gr.240705.118), 2019-03-14
Supplement: Supplemental_file_1.zip [file contig.4.DB38_length_632_mean_cov_7.17246835443.docx]

**DB38_length_632_mean_cov_7.17246835443**

TAGAGAAGAGGCATACCTTAGAAGAAACACTATTGAAAGGCCATGTTTGTTTGTTTATGTAGGTCTTCTAAAACAAGCTGCCATCTTTA
 >chr11:132274600-132274910 + E=8e-175 p=4e-03
ATACTCATTTCTCAATCTCAGTCCAAAAACACTTTCTCTAAGTAAAATGAATGAGGAAATTCAGTTTCCATTTTACTTTTAGTTTAGTT

TAGCCAAGGAGTTTGACAAAAATCGCTTAAAAAAATCTTTTAAGGAATGCATTAAGGCTAAAAAAGCCCAAACCCACCATGAGAAAGCA

CATCACAGAAGGCCCTATATGTCCTTATTCTTTATTTTTTTA|T|TATTTATTATTTATTATTATTATTTAT|AA|ATAATATATATTA
 >chr3:164729551-164729579 + E=4e-05 p=0e+0
TTTATTATATATATTATAAATATATAT|AAATT|TATACTATGCAGCCATAAAAGAGGATGAGTTCATGTCTTTTGCAGGGATGTAAAT
0 >chr3:59200998-59201036 - E=3e-03 >chr11:132240561-132240809 + E=2e-137
GAATCTGGAAACCATCATTCTCAGCAAACTAACACAGGAACAGAAAACCAAACACCACATGTTCTCACTTATAAGTGGGAGCTGAACAA

CGAGAACACATGGACACCGGCAGGGAAACATTACACACCAGGGCCTGTCATGGGGTGGAGGGCTAGGGGAGGGACAGCATTAGGAGAAA

TGTCTAATGTAGATG
