# Supplementary material for: Chromothripsis during telomere crisis is independent of NHEJ, and consistent with a replicative origin
Source: HighWire-hosted journal article supplement (doi:10.1101/gr.240705.118), 2019-03-14
Supplement: Supplemental_file_1.zip [file contig.4.DB40_length_791_mean_cov_6.32237673831.docx]

**DB40_length_791_mean_cov_6.32237673831**

TTTTTTTCTTTTTTTTTTTTTTTTTTTTTTTTTTTCTTCTTTTTTTTTTTTTTTTTTTTTTTTTTTTTTTTTGG|GTAAGTGTTTTTTG
 >chr6:160521767-160521841 + E=1e-23 p=0e+00
CTGCAAACTTTCCTT|TTTTTTTTTTTTTTGAGACGGAGTCTTGCTCTATTGCCCAGGCTGGAGTGCAGTGGGTGCGATCTCGGCTCAC
 >chr7:4640637-4640998 - E=2e-194
TGCAAGCTCCACCTCCCGGGTTCACGCCATTCTCCTGCGTCAGCCTCCCGAGTAGCTGGGAGTACAGGCGCCCGCCATCACGCCCGGCT

AATTTTTTGTATTTTTAGTAGAGACGGGGTTTCACCGTGTTAGCCTGGATGGTCTTGATCTCCTGACCTCATAATCGGCCTGCCTTGGC

CTCCCAAAGTGTTGAGATTACAGGCGTGAGCCACCGTGCCCGGTCCTGAGTTGTTTCTTAAAAAAATTTTAGATTCAGGGCCAGGGGCA

GTGGCTCACGCCTGTAATCC|GGCTGACCCCCCCACCTCCCTCCCAGACGGGGCGGCTGGCCGGGTGGGGGGCTGACGCCCCCACCTCC
 >chr4:175613275-175613479 - E=4e-68 p=0e+00
CTCCCAGATGGGGCGGCTGGCCTGGCGGGAGGCTGACACCCCCCACCTCCCTCCCGGACGGGGTGGCTGCCGGGCGGAGAGGCTCCTCA

CTTCTCAGACGGGGCGGCTGCTGGGCGGAGGGTCTCCTCACTTCTCAGACG|AGGC|GGCCGGGCAGAGATGCTCCTCACCTCCCAGAC
 >chrX:125775077-125775193 - E=6
GGGGTGGCGGCCGGGCGGAGGCTGCAATCTCGGCACTTCGGGAGGCCAAGGCAGGCGGCTGGGAGGTGGAGGTTGTAGCGAGCCe-49
