# Supplementary material for: Chromothripsis during telomere crisis is independent of NHEJ, and consistent with a replicative origin
Source: HighWire-hosted journal article supplement (doi:10.1101/gr.240705.118), 2019-03-14
Supplement: Supplemental_file_1.zip [file contig.4.DB41_length_724_mean_cov_12.8743093923.docx]

**DB41_length_724_mean_cov_12.8743093923**

ATGTTCTCATTCTCGAGGGGCCCCTGCTCCCCCCATCCCTCCCCAGCCACATGGCTGGACTGAAGCTTGCACCTGTTTTGATATCCAGG
 >chr17:75870231-75870476 + E=1e-135
GAAGGGTCTAGCCCAGTAGGTCACCTGTCTGATGGCTGCCCCTTAAATGCAGGTGGCATGCCCAGAAAGACTCAACCTGCCTCTGAAAC

CCTCCCTGGTCCCCACAGAGGGACAGCCACCCCCCTCCCTCCCTGCACCATCACCAAACACAGATC|A|AATGGTAATAATCATGAAAT
 >chr12:39237837-3923
GTATAATGTTATTATAAAATATTTTAGATGGATCTCAACACTTTGAGGAAAAATAAGTTGTTTTATTTCTTCTAGTAGTTGTCCCAACA
7963 - E=5e-64
CCATGTCAACTGTGGT|CATGCTGTTCCTTCAACGAACTACATTACTACAGTGAAAATTGATCACACAAAATGAGGTCATTTTTGTCAC
 >chr12:39238735-39238821 + E=6e-40
ACCCAACTAA|AACA|AACATCCCTACAACAAAAACTCAAGATGAAAGAGCCAGAGAGAAGCAAATTAAAGGCTTGGAAAGATGCAAAT
 >chr2:16239909-16240181 + E=8e-152
CAAGTCTTTGTCTAGAGTAGTGGAGCCAAGAACCTGGTGGCTTTACTCAACAGGTATTCACTGAGCACCTACTCTGTGTAGGAGACCCT

GAGAGATGATAACCTCTCAGTCTTTTTTCTTTTTTCCTTTAAATAGGGATGGGTTCTCGCTATGTTAACCAGGCTGGACTTGAACTCCT

GGACTCAAGTGATTCTT
