# Supplementary material for: Chromothripsis during telomere crisis is independent of NHEJ, and consistent with a replicative origin
Source: HighWire-hosted journal article supplement (doi:10.1101/gr.240705.118), 2019-03-14
Supplement: Supplemental_file_1.zip [file contig.4.DB41_length_1479_mean_cov_8.63421230561.docx]

**DB41_length_1479_mean_cov_8.63421230561**

TAAAAAATAACATATTCTAAAACATAGATTTGGAT|AAAGCATACAAATAAACAAAAAA|AAAAAAAAA|CTAATCAAATTATTTTCAA
 >chrX:148654870-148654902 - E=4e-01 p=8e-03 >chr9:
TGGGGCTACAAAGCATTGCATTGTAACCTGAAATCCAAAGCTTACATTGGCTTGAAAATTTGACCAGGCTTACTTAGCTGAAAGAGTCC
24002741-24002956 + E=4e-117 p=1e-02
TTTTAGACTATAAACTTTTGCTAATTTTGTACCAGAAAAACTGGGTTCAAAGATTTTATTCTTCATTCTCCTTTAAATCATATATATAT

ATATATA|TA|CTTAATAATAATAATGAAATTTCTTATGTTAAATAGTCTACAATTCCAAGTTCGTAGTGCCAAGGACTGTCATCAGCA
 >chr3:113480804-113481610 - E=0e+00
AACTCTCTTCCTGAATCCTGAACCTTCATGGTGTATTAGCACTGCAATGACTGGCTTTTGGATAGGCTTTTGTCAGATAAACTGCCTAT

GAAATGACTTTACCATTTTTTTTTTTTGAGATGGAGTTTTGCTCTTGTTGCCTAGGATCGACTGCAATGGCGCAATCTCGGCTCACTGC

AACCTCCACGTCCTGGGTTCATTTGATTCTCTTGCCTCAGCCTCCCGAGTAGCTGGGATTACAGGTATGCGCCACCACGCCCAGCTAAT

TTTGTATTTTTAGTGGAGCCAGGGTTTCTCCAAGTTGGCCAGGCTTGTCTCGAACTCCTGACCTCAGGTGATCCGCCCGCTTTGGCCTC

CCAAAGTGCTGGGATTACAGGCGTGAGCTGCTGTGCCCAGCCAACTTTACCAATTTTTTTCAAAATTCAGGCAATCATGCAGGAAAATT

ATCACCTTCAAAAGAAGTCAAACTAGAAACTGTATGACTACTTTAAAAAGGCAATTGCTTAAAATACTTAGAAACTTTTTTTTTTTGAG

ACAGAGTTTTGCTCTTGTTGCCCAGGCTGCAGTGCAATGGCGCGATCTTGGCTCACCACAACCTCTGCCTCCCGGGTTCAAGCAATTCT

CCTGCTTCAGCCTCCAGAGTAGCTGCGATTACAGGCATGTGCCTCCATGCCCAGCTAATTATGTATTTTTAGTAGAGTTGGGGTTTCTA

CATGTTGGTCAGGC|AACATATGCAAAG|TATATATATATATGATTTTAAAATATTTTTTAAAAGAGTAATTCAGAAAAAGGATAAGGA
 >chr9:24002968-24003357 + E=1e-221
AACTCAATTGTCCTGATCACGTAAGCAAAACTACTTTGAGATTAGCGTTTAGAACCACCCTTTTTCCCTCAATCTGGTTCCTAGTTCAG

GAAAGGTCATTTTATATACCAGAATAAATGAAAAAAATTATTTCTGCCCTACTGCATTGGACTAGTGTCCTCACTAGGAGTTCATGAAA

CAGTTTCAATAAAAATGCAATTACAATAAGGTATTTTAAATCATATTAATATGATTACCTTAGACTCACATTGAAAATACAGAGAATGT

TTAATTTTTAGAAAATGTTAAACACTTTAGTTTAGTAAATCCTATCATGTTTTCCAGTAATG
