# Supplementary material for: Chromothripsis during telomere crisis is independent of NHEJ, and consistent with a replicative origin
Source: HighWire-hosted journal article supplement (doi:10.1101/gr.240705.118), 2019-03-14
Supplement: Supplemental_file_1.zip [file contig.4.DB46_length_806_mean_cov_7.45285359801.docx]

**DB46_length_806_mean_cov_7.45285359801**

TTAACTAGGTCCCATATGGTAAATAAAATAATTGGTCATATTTCCTATACTTGGAATTTTTTTAAAGTTTAGTTTCGGAGACTTCATAG
 >chr4:102843729-102844048 + E=5e-180 p=5e-03
ACAGCCCTACTGCTTGTCTTCAGCATATATTTTAATAGGCCCAACTAGTATGAATTTTGGAATTCTGGCTTTTATTCAATATTGATGTT

CTGTTCTGTTAGAATTGAAGAAACTAGAATAAGTCACATAATTGCATTTGACTGCATGCATTATAAATTTATGTGTCAGTTTTGTGCTT

GAAACTACTTGGGAATCTCTTTCAAAAATCTGGCTATCACAGAATTT|TTCTC|ATTCATTACTCTGCCTCAGCAGAGTAGGAAACAGA
 >chr4:102845646-102846068 + E=5e-242
AGCAGAAAGGGTCAGGATGATGTACAGCTAGCCTCCACAGCAGTATAATCATTTGGCGGTGCGTTGGGAAGGGGAGCAGGCATCACTGG

GAAAAGCAAGATGAGTAAAATATCTGAATAGTCCTTGAACGTTTCTTACAACTCAGACACATAAACAGATTATTGCATTATCAATTTAC

ATCACCAAAAGATAAATTAGCCCTAAAATTCAACAAAATAGAGGTTTTGTAAAATGAATATAGTGTGTGATTTGTATTTCCAATTTCTC

GAATAAGCATAATGTATTATATTCATCACTCAGGTTTTTTATATCAGAAATGTTATATTCTCATAAAAACAGGAGACACACATTTTTCA

TAATGTAGACATTTGTTATCC|TTTTT|TTTTTTTTTTTTATTTATTTTTTTT|CTTCATATCTTCCCTTAATTGAATAATTAGTATTT
 >chr6:19771154-19771184 - E=3e-03 >chr4:102846093-102846132 +
TAAA|TAATATE=1e-05
