# Supplementary material for: Chromothripsis during telomere crisis is independent of NHEJ, and consistent with a replicative origin
Source: HighWire-hosted journal article supplement (doi:10.1101/gr.240705.118), 2019-03-14
Supplement: Supplemental_file_1.zip [file contig.4.DB48_length_592_mean_cov_9.03547297297.docx]

**DB48_length_592_mean_cov_9.03547297297**

ATTCGCCTGCCTTGGCCTCCCAAAGTGCTGGGATTACAGGCATGAGCCACTGTGCCCGG|G|CTGTGTTGATTTATTTTATTTTATTTT
 >chr12:65136038-65136097 + E=9e-18 >chr16:26753405-26753438 -
ATTTTA|T|TTTATTTTATTTTATTTTATTTTATTTTATTTTATTTTATTTTATTTTATTTTTATGTGACGGAGT|ATCCCTGGAGTGC
 E=4e-08 p=0e+00 >chr9:76965762-76965828 + E=5e-22 p=0e+00
AGTGGCACGATCTCAGCTCACTGCAACCTCTGCCTTCTGGGATCAAGCAATTCTCCT|GCCTCAGCCTCCTGAGTAGCTGGGATTACAG
 >chr1:29000201-29000564 - E=6e
GCGCCCGCCACCATGCCTGGCTAATTTTTGTATTTTTAGTAGAGACAGGGTTTCATCATGTTGGCCAGGCTGGTCTTGAACTCCTGACC
-196
TCGTGATCCACCCACCACGGCCTCCCAAAGTGCTGGGACAGGCATGAGACACCACGCCTGGCCTAATTTCTTTACTTCTTTGTAGACAT

GAGGTCTTGCTATGTTGCCTAGCCTGGTGTCAAACTCCTGGGCTCAAGCAATCCTCTCACCTCGGCCTCCCAAAGTGCTGAGATTAAAG

ACCTGAGCGACTGTGCCCAGCCTGTAGTTATTTCCAAAGACAAAAACAACACTTTGAAACTAAG
