# Supplementary material for: Chromothripsis during telomere crisis is independent of NHEJ, and consistent with a replicative origin
Source: HighWire-hosted journal article supplement (doi:10.1101/gr.240705.118), 2019-03-14
Supplement: Supplemental_file_1.zip [file contig.4.DB50_length_1049_mean_cov_7.68732125834.docx]

**DB50_length_1049_mean_cov_7.68732125834**

GAGAGATGAGAGAAACAACGACTGGAGGGATTAAGAAGAACTCTTAGGAGCAGCTTGGCCTAAAGGGTAAGAGTTGTGTGCCTTAAGTC
 >chr5:79287169-79287676 + E=6e-287
AGACCCACCAGTAATTCTTCAAATATTAATATTTATTAGATCCCTAGAGTGTTCCAAACCCTTTGAACATTAAATCTGTGTGATGCCTA

AATTAACCTGTTTGTAAAACAGGGATGACCCAGTATTTACAAGATTGTGGTATTTACAATGTCGGAGAGAAAGAACTTGGCACACAGGA

GGCACTCAGTAATTGTTCAACCCCTTCTCCCATGTATGTGGCCTCTGCCTGCCTTTCCAGCCTCAACCTGTTCTCACCCTCATGTTCAC

TGGCACAACCCTGCTTAAAACTTGCAGTATTTCTGAACGTCAGGTAAATTGTGCCCACCTTCAGTGCTGGTCCTTCAATCTGGAATATC

TTTCTTCCCTATGCAGCTGCTCCCTCAAAAATGAGCTTAACTCACCTTCCCTGTGAT|GTTTT|AGTTAAGAAGATCCGACCATCTCAG
 >chr5:79287877-79288199 - E=1
TGGAATAGAGGAAAGAACTCAGAGGCATGACTGCGAGGGTGTCCCAGAAAGACTACTGTGCCTTCTAGAAAAAAGACCCAGCACCCAAG
e-181
TTCTAACTCTGAGACCCAGTCATATGTTTGGATCATAGCATTTCCAAGACCAAAATTTCCTCTTTAATAGTTTTTCTGAGAAACTGTCA

GGTTTAACGTCAAGAAACATTTAGTCTGTGCTCATTAGGCCCACAGACATGACGAGCTACATGATTTGAGGGGCCCAGTCCAAAATAAA

AATGCAGAGCCCCTTGTTC|AAAACT|CAAAAGAAACCTCTGCAACTTTTCGTAAAATTACTATTCAACAAATATTTGCTAGGCACTCC
 >chr5:79288194-79288363 + E=1e-89
CTTACTGTTTACATAATCATTCAAATTACAGTGCCAGCCTGCTAAAGTCTTTTTTACATGTTTCAAAACCAAGAGTTCTAAGAAATGAA

AAAGAGATATG|T|GCACAAACAGGCTGAATACTATTCCAGAGAACCACACAGAAAATTGAAGCCTTCAGAAATTA >chr5:79289180-79289243 + E=6e-23
