# Supplementary material for: Chromothripsis during telomere crisis is independent of NHEJ, and consistent with a replicative origin
Source: HighWire-hosted journal article supplement (doi:10.1101/gr.240705.118), 2019-03-14
Supplement: Supplemental_file_1.zip [file contig.4.DB51_length_955_mean_cov_5.60523560209.docx]

**DB51_length_955_mean_cov_5.60523560209**

ATCACATCAAGTTAAAAAAGCTTCTGCACTGAAAAAGAAACAATCAACAAAGTGAAGGAACAACCCACAGAATGGTAGAAAATATTTGC
 >chr6:145789924-145790254 + E=1e-181 p=2e-02
TAACTATCCATCTGACAAGAGATTAATAACCAGAATACATAAGGAGCTCAAACAACTATATAGAAAAATAACTAATAATCTGATTTTAA

AATGGGCAAAAGATCTTAATAGACATTTGTGTTAGTCCATTTTCATACAGCTATAAAGAACTGCCTGAGACTGAGTAATTTATAAAAGA

AAGAGGTTTAATTGACTGACAGTTTCACATGGCTGGAGAAGCCTCAGGAAACTTACAATT|AT|ATAAAAATATGCTCAACATCATTGA
 >chr13:109305481-109305509
T|GCCAATGATAATT|GGCAAGTACTGACCTTCTGGCTGGCTGTCACAGTGAGAATCTTTTCTGGCATTGGTGGCCCAACATTTTAACT
 - E=6e-02 >chr20:20144871-20145362 + E=2e-280
TTACAGAGCCAGTAATTTCCAAACCTGGCCCACATCCTAATCTCCTGGGGAATTTTTTAAAACACAAATTCCTAAGCCCCATCCAGAGA

TTCTAGTCCATCAAATTTTAACAAGGCCTACAGAAGTGGGCTAGAAATCTGGCCTACCTATGTAACAATTGGGAATCTGGAAAATTTTC

ACTTACATAACCACATGCTGCTCCCATTCTGTAAAGTTTGCATCTCTTGGATAATTTGAATTTGGGTTACTGGTTGTCTAGAGTCTTTG

GTTGCAAGTAACAGGAAATCCAACCAAACTGGCTTTGAAAAAAAAATTGAATAATTGCCTCACATAACTAAGGATAACTCTGGTGGTGA

GACTGTTTTAAATATGGCTTGATCTAGGATTTATTTAGATTACCAAATCAAGGACCAA|GTTT|TAATGTTTAGTTCCCACAAATACAT
 >chr6:145791009-145791109 -
GAGAACATGCAAAGTTTCTCTTTCTGTGCCTGGCTTTATCACTTAACATAATGATCTCAAGTTCCATCCATE=3e-48
