# Supplementary material for: Chromothripsis during telomere crisis is independent of NHEJ, and consistent with a replicative origin
Source: HighWire-hosted journal article supplement (doi:10.1101/gr.240705.118), 2019-03-14
Supplement: Supplemental_file_1.zip [file contig.4.DB51_length_1041_mean_cov_7.10854947166.docx]

**DB51_length_1041_mean_cov_7.10854947166**

TTGGTGAGGATGTGGAGCAAAGAGAATCCTTTTACACTATAGGTGGAAATTTAAATTGGTACAACCACTATGGAAATTAATATGGAGGT
 >chr6:79278280-79278612 + E=1e-184 p=5e-03
CCAAATAATCAAAAATGGAATTACTCTTTGATCCAGCAATTTCACTACTGCGTATATCCAAAAGAATTAAAATCTGGATTTCAAAAAGA

TATCTGTACTCCCATGTTTATTGCAGCATTATTCACAATAGTCAAGATATGAAAACAATCTAAGTATCTGTTGATGAATAAATGAATAT

GGAAAATGTGGTGTCGTTTATATACAATAGAATACTATTCAATGTTAAGAAAAAAGT|AATTTCTG|TGGCATGGAAGTTTAAATCTTA
 >chr6:78571219-78571261 - E=2
TTAAATGCCTGA|CAAAGTAATTTATAGATTCACTGCCATCCCCATCAAGCTACCAGTGACTTTCTTCACAGAATTGAAAAAAAACTAC
e-13 >chr6:79280922-79281122 + E=2e-103 p=3e-03
TTTAAAGTTGATATGGAACCAAAAAAGAGCCCACATTGCCAAGACAATCCTAAGCAAAAAGAAAAAAGCTGAGGGCATCATGCCACCTG

ACTTCAAACTATACAACAAGGCTACGTAACCAAA|CTAATAATAAATAATATTTAAT|AAAATCTGCTTCAGGCACAGAGTACTTGGAT
 >chr6:78571403-78571794 + E=4e
GAACTTAAGCAAGTTAAATTACTCTAAGACTCAGTTTTATCATTTGTGAAATTATTGTGAGGATTAATGATGTAGTACATATGAAGTGC
-220
TTAGTCCAGTATCTGACACACAGTAAATACTTCATGATAGTTCTTGTATTGTTGTTATTCTTACTGGTAGACATAATATTTCTGATGAT

CTTTTTTTATAATTAGACCATATGGTTGTTTGTTATTATTATCATGCATACTTCAAACCTGTCTAGATGAAACATCTTTTAACCAAACA

CATTTTGGGAAACATCATTCTAGGACATGTTTTGTAGCCAGTGAGTATCAAAAGCCTTGGTAGATCCACAGCAAAGAATTAAAAAAAAA

AAAA|GGGTGGGGGGGGGCAAGCAGGCCGAATTGACACGAGCGCAGTGGAAAGCGGTCGAGGGGTGGG
