# Supplementary material for: Chromothripsis during telomere crisis is independent of NHEJ, and consistent with a replicative origin
Source: HighWire-hosted journal article supplement (doi:10.1101/gr.240705.118), 2019-03-14
Supplement: Supplemental_file_1.zip [file contig.4.DB52_length_302_mean_cov_4.10264900662.docx]

**DB52_length_302_mean_cov_4.10264900662**

GAAGCAAACTCTATCCCTACACTGCGATCTTCCAATATTTGT|ATTAATAAAAAAAAAGATCTTAGGCCGGGCGTGGTGGCTCACGCCT
 >chr7:74543681-74543770 + E=3e-10 p=2e-02
GTAATCCCAGCACTTTGGTAGGCCAAGGCAGGAGGATCACTTGAG|CCTGGGAGTTT|AAGACCAGCCTGGGCAATAGAGCAAGACCCC
 >chr1:54813050-54813093 - E=2e
ATCTTTT|TTTTT|GAGATGGAGTCTGGCTCTGTCGCCCAGGCTGGAGTGCAGTGGCGCAATTTCGGCTCACGGCAAGCTCCACCTCCT
-11 >chr11:59235696-59235783 + E=6e-29
GGGTTCA|GG|AAAAACAAACAAAAACCCTGAGGGGGAAAAA >chr19:58976804-58976835 - E=3
