# Supplementary material for: Chromothripsis during telomere crisis is independent of NHEJ, and consistent with a replicative origin
Source: HighWire-hosted journal article supplement (doi:10.1101/gr.240705.118), 2019-03-14
Supplement: Supplemental_file_1.zip [file contig.4.DB53_length_490_mean_cov_5.62448979592.docx]

**DB53_length_490_mean_cov_5.62448979592**

CCACCCATCCACTTACCCATCTATCCCTCCATCCACCCATCCAC|TCCTCCATCCACCG|ATCCACCTCTCCATCCACCCCTCCATCCA
 >chr9:136703596-136703640 - E=8e-03 p=0e+00 >chr15:40285342-40285381 + E
CCCAC|CCATC|TACCCATCCCTCCCTCCATCCCTCTATCCAACCATCCATCCACCCATCTATCCCTCCATTCACATATCCATCCTTCC
=8e-03 p=0e+00 >chr7:155844667-155844855 + E=1e-98
ATCCACCCATCTATCCCTCCATCCACCCATCCACTTACCCATCTATCCCTCCATCCACCCATCCATTCCTCCATCTACCGATTCATCTC

TCCATCCACCCCTTCAT|TAAGCCTTT|CCTGAGCACGTTTTATGTTTGTTCACCCAGAAACAGCTCCTGTTACTAGCTCATCCCCTCA
 >chr8:135655962-135656151 + E=4e-87
GAATGGGGGCGCCTTTTGTAATCTGCACAAAGGTCCCTATGTGCCAGCCAAGGCTCCAGCAGTCACATGAAAGCTCCAGGCATGGAGCC

TAAGTCTGAGTCCAAGACGTGTGCCGCTTCCACTACACT|CCGGGGCTGGCC
