# Supplementary material for: Chromothripsis during telomere crisis is independent of NHEJ, and consistent with a replicative origin
Source: HighWire-hosted journal article supplement (doi:10.1101/gr.240705.118), 2019-03-14
Supplement: Supplemental_file_1.zip [file contig.4.DB54_length_1204_mean_cov_9.2134551495.docx]

**DB54_length_1204_mean_cov_9.2134551495**

TATTTCTGTTAAATGTCTTGATGCCTAGTTAAATTATTTGACGACCCTTTTGCTCCTGTCAAGCCTGGGCCTTTGTTAGTTTGTGCTTA
 >chrUn_gl000241:29730-30343 - E=1e-285 p=4e-02
TTTATTAGATTTTTGCCTGCAGACTTAGACAGTGACTCTTACTCTAGGAAAGATTCATCCTCATGGGCCTCAGCCACATGTTCTAGGTA

TACTTTGTGAGTTCTCTCCACTCTGCTATGTCCCAAATTTGTGTGATCTCTGGCATCTCCACTCAGCCCTCAGAAGTGCCAGCCACTCT

GCAGAGGCCTTGTGGAGCCTGCCTACTGTATGCACTCCCCCAGCCCTTGGCCCCAGACCTGCAGAGAACTTTTGCATACTCTTTTGAGG

CCTCACCTGTATGTAGTTCCCTCTTCTCCAGTACCTTATTCTATAAACTCCAAACACCTTAGCACTGCAAGACTCTCAGCTTAGAGAAA

GTGGCATTGCCTCATTTTTGGACGTCTCTACCTCTCTCTGCATGGTCAAGAAACTGCCATTGGGCAGAAAACAGAAGTATGTGTGAGAT

TTGCCTCCTGTGTTTTCCTGTTCTCAAATATCACAGTCCTGTTCTGCCTGTGTTCCAATCCCTGGAAACAGTTCTCTC|T|AAAAGAGC
 >chr1:1
TCTGATAATCTTGTTAGGCTGAATTTAGACTGTTACAGAATGTCTTTTTTTCTTTTTTACCTCTTCTACTTGTAAATGCATTTATGAGT
93315685-193315824 + E=1e-71 p=1e-03
TCTTTCTGAATTTTGAGTATCTGTGTTTCACCTGAAAGCCT|G|TTAAGCTGTAATTGGTACTATAGGTACACCAGTAATTTTTTTTTT
 >chr1:193314890-193315130 + E=3e-132
TGCCAGTATTTTATCAAGGGGGAGATTTGTAGAAGATTAGTAAGGTCAGAGAAGTTTAATTTTTGAATTAATTGTATCAAGTGTATGGC

ATTAAGATAATGGTTGTTTGCAACTTAACTTTGGAAGGGGATCATCATTTATTAGTCCTTTTTGGTATTGAAATTTTCTATTTTTTATA

AAAGCATTATCATATA|TATTTTCACATAGTTGAGAATGTTTCCATATGTCTGGCATGTTTGTAATCCAGCACTTTGAGAGGTGGAAGC
 >chr9:69073457-69073670 - E=5e-95
AGGAGAATCACTTAAGCCCAGGAGTTCAAAATCAGCCTAGGCAACAAAAGGAGACCCCCATCTCTACAAAAATATTAAGAAATTAGCTG

GGTATGGTGGTACAAGCCTGTGGTCCCAGCTACTCGGGAGTCTGAGGTGAGA
