# Supplementary material for: Chromothripsis during telomere crisis is independent of NHEJ, and consistent with a replicative origin
Source: HighWire-hosted journal article supplement (doi:10.1101/gr.240705.118), 2019-03-14
Supplement: Supplemental_file_1.zip [file contig.4.DB55_length_298_mean_cov_4.53020134228.docx]

**DB55_length_298_mean_cov_4.53020134228**

TCTGTTGTCTTTAATAAAGAGCAGTGTCTTCCTCCCTCAGTGCCCATCTCTTTGCACCTGCCACTCTGGCTGCTGCTCACACCACTGCA
 >chrUn_gl000212:112572-112797 - E=1e-120
CAGAAACCGCTTTCTCCAGACTTACCGGCAACCACCTCAGCAGCACAGCTGTTGCTTCTCAAACTTTAATGTGCATCAGAATCAATTGG

AGGGCTCATGAGCCTGCAGGTTGCTGAGCCTTACTCACAGTTTTTCT|TGTGCCTGACCTGGAAGTGGATTTTGAAGTGGATTTTGCAG
 >chr19:19483610-19483683 + E=3e-32
CCTGTTTGTGTCTCCCAAGCCACAAAAGACTC|GAAATAGATTATTACCTACGGATT|TTTTCTGTCTTCATGACATATATAATTTTTT
 >chr7:53883892-53884121 - E=4e
CTTAAATTTTTATTATATTTCTAAGCTATGCTATTTGCAAGTTTTTTTTCAAATTGTCACATATTCCCTAAAAAAGTATTTTAATATAT
-123
TTGTTGAAAAGAAATTTGTGTGTATGTGATCCCATGCAGTTTAAACTGGTGTTGTTCAAGGGTCCACCGTATATCGTGGTCAGAATTCC

TCCTCAGGGTGATTGGATT|C|CCGGCTAATTTTTGTATTTTTGGTAGGGACGGGGTTTCACCATGT >chr7:53869119-53869165 - E=5e-16
