# Supplementary material for: Chromothripsis during telomere crisis is independent of NHEJ, and consistent with a replicative origin
Source: HighWire-hosted journal article supplement (doi:10.1101/gr.240705.118), 2019-03-14
Supplement: Supplemental_file_1.zip [file contig.4.DB55_length_852_mean_cov_7.00821596244.docx]

**DB55_length_852_mean_cov_7.00821596244**

AATGGAATTGAATGGAGACTAATGGGATAGAATCAAATGGAATGGCATCGAATGGAATGGA|CTCGAATGCAGTGTG|CTCGAATGGAA
 >chrY:13801064-13801125 + E=8e-16 p=0e+00 >chr1:2242
TGGAATCGAATGGATTGACA|T|TCAGGTTTGGGCAGAATCAGGCGCATGACCCTTAAGATATCAAACCAAGTTCGCCTGAAGCCCAGA
03930-224203962 + E=2e-04 >chr7:154585155-154585482 + E=8e-185
GCCATGAACCAATTTCCCTAATTAGCTAGAGAGTGTCCCTGGGTATTTTATCTTTAAGGAGGAGGAATTAGAGAATGGAGCCTTCAACA

GCCCAGGCTGGGATGCTTCTCACCCTGTGTCGCTCTCTGGGGCCTCCCGCCAGCCCTTTTCCGGTTCTTTCTCTGTCCCGCCTCCCCGG

ACCCCTCGCTGCCCGGTCAGGTGGTTAGTTGTGCGTTTGCCTGGTACTGCGGTGTGAAAGTCAAGGCATCAGCTGGAGAGAC|AGGGGA
 >chr
GACGGGTGAAGAACCGATGGTCAGACGCGCCCGAGGTGGCGCCAGAGTCGTCTCAGCCCTCGGGCCTGGGACTTGGGGACCGGCCGCCC
7:154585934-154586352 + E=1e-239
AGCTGCTGCGGGGAGCCCGCGGCGCAGAGTCCCGGCTCCGGCGTGGCTGCCACCTCGTGGCTGGTGCAGGCGCTGCCGCAGACCCGACC

GAACCCATCCGTGAATTGCCAGAGGCGCCCCGTGCCTGGCACCTGGACGCCGTCCGCAGTTCACTGAGTGTTGCTTCCCTTTATCCGCG

CTCACCGCTGTGACCTAAGTGAGCGTCCTCCTCGTTGCAGCTGATGCTCAGAGAGGAGGGGCCCTGCCTTTCCCCAGACCCCGCCGACA

GCCTCCCCCAGCGGGCTCCAGGCGTGCGTCCCTCCCCACGTCCTGGTGAGGCCAGC
