# Supplementary material for: Chromothripsis during telomere crisis is independent of NHEJ, and consistent with a replicative origin
Source: HighWire-hosted journal article supplement (doi:10.1101/gr.240705.118), 2019-03-14
Supplement: Supplemental_file_1.zip [file contig.4.DB57_length_399_mean_cov_5.63909774436.docx]

**DB57_length_399_mean_cov_5.63909774436**

TCATTTGTGTCCAGACCTGCAGATTTACCTTCACCTAATTAAAGATACATTAATTAAATTAGAT|C|TCTCTGGAGAACCCTGACTAAT
 >chr7:147333075-147333139 - E=5e-27 >chr17:67582775-67582
ACACT|GAAATGATGGCTTCTACGGCTGGAAATGTGCAAGATGAAAGATGAGCCAGGAACATATC|TTAAATAT|TCTGTTACTTTTCT
802 + E=1e-04 >chr7:147335307-147335366 - E=5e-24 >chr7:1441672
ATTTTCTTATTATCCTCTTAACTATTTTCCAGGCTGAGTAAATTCTTTGTACACTGGATATGTGGCTAAATCAAAACAGAAAGTAGATC
49-144167489 - E=5e-130
CTTCTATCTTTGCATTTTAGAAATGAGTAACACATATCACATACCAGAGTGTATCTTTTGCAATTATTCACAAGCAACATGTTTGAAGG

TTGAACCACATACAGTCAATTGTACTGTTAAAAATTTAATGCTTTTGC
