# Supplementary material for: Chromothripsis during telomere crisis is independent of NHEJ, and consistent with a replicative origin
Source: HighWire-hosted journal article supplement (doi:10.1101/gr.240705.118), 2019-03-14
Supplement: Supplemental_file_1.zip [file contig.4.DB57_length_771_mean_cov_7.45006485084.docx]

**DB57_length_771_mean_cov_7.45006485084**

AAGGGTATTTCATCCACACTGTTTTTTAAATGCTTCCTAGTCAAACTTGAATATGCAATGAGACGCGGGAGCTTTGTGGCGGAAATATA
 >chr7:155264407-155264748 + E=3e-193
ATTAAACTGGGGAAAGATGTAAAAGCTGAAGAATGGGATGACATCAGGCTGATTTCACACTCGGCAGTCGGATCGCTGGGCCCAAGCCG

CGCTCTTGCCACGCAAGGCAGATCAAAGTGCCCTGCCACCGCTAAAAAGGCAAAAGGGGACTTAAGTATGCTAATCCCCAGGACAAATA

TATTTTAATCTTGTTAGAATACAAGTTAATGCTGCAGCTCAGTGGCTGAACTTGGTCAGACTGTAGAGATCCA|T|GGCAGTGGCTATC
 >chr7:1539354
TTGGTTTGCTGGTCTGAATCATGGGAACAATAGTGCTGCTGTGCTTCCTTGTTAGGCTATCGTGTTACTTAAATCAGACAGTCTAATCC
63-153935673 - E=2e-114 p=3e-02
GACTCTGACTTAACCTCTTAATCCACGCTAGCCAGTTATTGCTATTATCACCTCATATTGTCCTCGATTTCATTTTTAAGGAGAAAAAT

TTTACACCCCTTCTGAA|T|GAGATTGGAAGGTGCTGGGTTTTATTCTGTGAGATTGGAGGTATTGAGTGAGATTGGAAGGTGTTGGAG
 >chr7:154087508-154087696 + E=3e-101 p=1e-03
AGTTTCAAGCAGAAAAACTGTAAGATCTGCAGATGTTTTAAATAGATGTCTCTGTAAATTGTAAAACTGTAAGACATGGGTAAGAAGCA

ATCATTTTCAGGGGTGAGACTGCTTGTA|G|CACTTTGGATAATGTCTCTGTTGAGTTGCTTTTA >chr6:132126871-132126906 + E=3e-0
