# Supplementary material for: Chromothripsis during telomere crisis is independent of NHEJ, and consistent with a replicative origin
Source: HighWire-hosted journal article supplement (doi:10.1101/gr.240705.118), 2019-03-14
Supplement: Supplemental_file_1.zip [file contig.4.DB67_length_273_mean_cov_2.35531135531.docx]

**DB67_length_273_mean_cov_2.35531135531**

GCGACGCAAGTCGCCGTACGCCAAGAATGCGCCAACACACCCCCGCCGGGGTA|AAAGAGCGAGCCTCTGTAGCAAAAAAAAAAAA|GC
 >chr1:37776441-37776473 - E=7e-02
CA|GGCATGGTGACAGGCACCTGTAACCCCAGCTACTCAGGAGGCTGAGGCAGGAGAATTGCTTGAGCCTGGGAGGCGGAGGTTGCAGT
 >chr6:141912376-141912478 - E=5e-32
GAGCCGAGATCTTGCT|AGG|GCACTCGAAGCGGGGGGACAGAGCGAGACTCC|GGCGCAGAAAACGAAGGAGG|GCGCAGGCGTGGTG
 >chr3:49126516-49126548 - E=7e-02 >chr2:4312393
GCTCACGCCTATA3-43123960 -
