# Supplementary material for: Chromothripsis during telomere crisis is independent of NHEJ, and consistent with a replicative origin
Source: HighWire-hosted journal article supplement (doi:10.1101/gr.240705.118), 2019-03-14
Supplement: Supplemental_file_1.zip [file contig.4.DB69_length_842_mean_cov_22.5023752969.docx]

**DB69_length_842_mean_cov_22.5023752969**

CACATGTATGTTTATTGCAGCACTATTCACAATAGCAAAGACTTGGAACCAACCCAAATGTCCATCAATGATAGAACTGATTAAGAAAA
 >chr9:66478618-66478734 - E=7e-55 p=0e+00
TGCAGCACGTATACACCATGGAATAG|T|GTAGAGACAGGGTTTCACCGTGTTAGCCAGGATGGTCTCGATCTCCTGACCCTGTGATCC
 >chr9:66469907-66470439 + E=3e-308
CCCCACCCTGGCCTCCCAAAGTGCTGGGATTACAGGCGTGAGCCACTGTGCCTGGCTCGTCTTCTTTTGAGAAGTGTCTGCTTATGTCC

CTTGTCAATGTTTTAATGGGGTTGTTTTCCTAATGTCCAACATCACTAATCATCAGAGAAATGCAAGTCAATGAGAGATACCATCTCAT

ATTAGTCAGAATGGCTACTATTAAAAAGTAAAAAAATGACAAATTCTGGTTAGACTTCAGAGAAAATGAAATGCTTATACACTGTTGGT

GAGAATGTAAATTAGTTCAGCCACTGTGAAAAGCAGTTTGGAGATTTTTCAAAGAATTTAAAACAGAAGTGCCATTCAACCAGCAATTC

CATTACTGAGTATATATCCAAAAGAAAATTAAGAATTCCACAAAAAAGAAACCCCACATGCACTTGTATATGAGTCATATTCTATTCAC

AATAGGGAAGGCATGGAATTAAC|TTA|ATGTGTGCATAGTGTTTTATGGCGTATATGTGGCACATATTTCTATC|CA|CACACACACA
 >chr9:66470456-66470508 - E=2e-19 >chr8:85337
CACACACACACACACACACACATAGAAGAAAAACTGGCTTTCTAAAAATTGATGCTCCAATTGCATGCTATTGTTGGATTGATCATGTT
906-85338054 - E=4e-71
TCTGGAGGGTCTCTGGAGTGACAATCTTCCAATAGCATCAGGATAGG
