# Supplementary material for: Chromothripsis during telomere crisis is independent of NHEJ, and consistent with a replicative origin
Source: HighWire-hosted journal article supplement (doi:10.1101/gr.240705.118), 2019-03-14
Supplement: Supplemental_file_1.zip [file contig.4.DB70_length_638_mean_cov_9.09090909091.docx]

**DB70_length_638_mean_cov_9.09090909091**

GTGATCGCAGCTCACTGAAACCTCAAAA|TCCAGGGCTCAAGTCATCCCCCCACCTCAGCCTCCTAAGTAGCTGGGACT|GCAGGCATG
 >chr1:77583983-77584011 + E=4e-02 >chr10:67017248-67017298 - E=2e-12 >chr1:2
CACCATTACACCCAGCTACGTTTTGTATTTTTCATAGAGACA|TGAAAAAC|GGCTCACTGCAACCTCCATCTCCCAGGTTCAAGCAAT
38923055-238923106 - E=6e-07 p=0e+00 >chr9:133388891-133389395 + E=2e-257
TCTTGTGCCTCAGCCACCTGAGTAGCTGGGATTACAAGCACACACCACCATGCCCGGCTAATTTTTGTATTTTTAGCAGAGACAGGTTT

TGCCATATTGCCCAGGATGGTCTCAAACTCCTGGCCTCAAATGATCCACCAGCCTCAGCCTCCCAAAGTGCTGGGATTACAGGTGTGAG

CCACCATGCCTGGCCCAGAAAAAATTTTTTATTTCTGATTCCAACATCTTTATCAAAATGTTTTGGTTAATATTCAGATGCATTTCCTG

CCAGTCATTCTTTCATATGCACATTCGTTTACAGGCATGTCAGGTAGTCTGTTTACATTGTGTACCTGTGCATTTGGTTTTTTGTTTTT

CGGGTTTTTTTTTTGAGACAGAGTCTCGCTCTGTCACCCAGGCTGGGGTGCAGCAGCGCGATCTCGGCTCACTGCAACCTACACCTCCC

AGGTTCAAGCGATTCTCCC
