# Supplementary material for: Chromothripsis during telomere crisis is independent of NHEJ, and consistent with a replicative origin
Source: HighWire-hosted journal article supplement (doi:10.1101/gr.240705.118), 2019-03-14
Supplement: Supplemental_file_1.zip [file contig.4.DB73_length_723_mean_cov_14.3042876902.docx]

**DB73_length_723_mean_cov_14.3042876902**

AATGAAACTGAGTAAGTACAAAACAGCAAAATAGCATTGGCCGCATCCCTCAGGGCCTCACGCACGCACCAGCCACAGCTGGTCTGGCC
 >chr7:75947922-75948149 - E=9e-125 p=1e-02
GCCCTGCCCCATTCCTTGAGCCACAAAATGCTGCAGTGATGCTGGTTTGCAAAGCCCCAGAGCTAGGTCGGGGGATTCAGCATCCCTCC

CGGCCCAGGTCTGGGCCCCCTCCCTACCCCAACCTGGGGGCTCTTGCAG|AGCCTCTCCCCCTCCCTCATCACTTCCTCT|GACGCTTA
 >chr7:7
GTTGACACTGGTCGTCAGGGAGGGTTTCCTAGAGGAAGTGATGCCTGCGCAGTGTCTTTGGGAAACTTG|AG|CTGGGCATGGTGACGC
5976361-75976440 - E=1e-35 >chr7:75968639-75
ACACCTGTAATCCCAGCTACTCGGGAGGCGGAGACAGGAGAACTGCTTGAACCCGGGAGG|CA|ATCAATTCTAGTATTTTTCCAGTTT
968719 + E=2e-36 >chr7:75969539-75969850 +
ATTCTCTACAAATATAACCTATGGTTTCCAAATATCACCTGTCCTTTCCCATAGTTACAATTTCCTATACTTGAATCATATACTACCTG
E=3e-175
GACAAGGCCAATGCCAATAATGCTTATGAGCATTTTTTTGTTTTGTTTTGAATTCAATGGAACTATTTCCAGTGGTTTCATTCTTAAAT

GTCAGCTCTTGGTTTAATTGTATTTTTCTCTATCATGTTAAGAAAGTATCCATTTAGTCCATATTTTTCTAATAAACTTTTGTGATCAG

AAATGGATTTTTCAACA
