# Supplementary material for: Chromothripsis during telomere crisis is independent of NHEJ, and consistent with a replicative origin
Source: HighWire-hosted journal article supplement (doi:10.1101/gr.240705.118), 2019-03-14
Supplement: Supplemental_file_1.zip [file contig.4.DB76_length_1270_mean_cov_18.5220472441.docx]

**DB76_length_1270_mean_cov_18.5220472441**

CATATGATTCAAATTTAGTAACATATTACATGTTATAAACTCAAATTTGCACTTAACGAACAAAAATATTACACTTCACTGCTGTTCAT
 >chr9:25184551-25184899 - E=3e-197
ACTCTCACTGCTTTACCTTTTTTTATTGTGGTAAAAAACATATAACATAAAATTTACCATCTTATTTCTAAATGTACAATTGAGTAGTG

TTAAGCATGTTCACATGGTTGTGCAACCAATCTTCAGAACTTTTCATCTTGCAAAACTGAAACTCTACATATTAAGTGATAGCTCCGCT

TTTCTCCTTCCTCCCAGCCCCTGGCAACTACCATTATGCTTTCTATTTCTATGAGTTTGATTACACAAGATACCTCATATC|T|TGGGA
 >chr
GAAAATTTTCACAACCTACTCATCTGACAAAGGGCTAATATCCAGAATCTACAATGAACTCAAAGAAATTTACAAGAAAGAGCAGTTTT
11:49486046-49486436 + E=2e-219
AAGAAGGATGTTTACAACAATAAATGCCTACATTAACAAAAAAAATTCCAAATACATAATCCAATGCTGTACTTCAAAAAACTGAAAAT

AAAGGTCAAACTATGCCTAAAGTTAACAGAAGGAAGGAAATAATAAAGATCAGAGAAGAAGTAAATGAAAATAGCACAAAAGATCAATG

AAGCTAAGAATTGGTTTTTAACAAGGTAAACAAAATTGACATACCTTTATCGAGAATAAGAAAAAAAAAGACGCAAATAAATACAATCA

GAAATGAAAGAGGAGACATTACAACAG|AT|TCCTGTAAAAGCCATTTGGATGACCCAATGGGGTGAGTTTACAGGGAAGCGCTCCCTG
 >chr20:49266242-49266445 + E=5e-110
AGGGCTAGGCTGGCTGGAAGCAGATACTTTGCCCCCTTCCAAGGACGGTAATGAGGTTTGAGGCTTCCAATGGGGGCAGGGGATGATCT

GGGCGCCAAAAGCCCTGGCCTGGGGTCAAAAGATCTGGGCTCCAGCCCCAGCCG|TTTATGTGACTATTTGAATTTTTTATTTGTGTTT
 >chr9:25184298-25184628 + E=2e-1
ACAATTTAAAGATTTGATAGAAGCAACCCAAGTTTTTGTTTATTTATTTACCTGTCGATGAATGGATAAAGAAAACGTGGTATATACAT
86
AAAATAAGTTATTAATTGACTTTATAAAGGAAGAAAATTTGGACTCATACCACAATATGAATAAACTTTGTGGACATTATGCTAAATGA

AATAAGTCACAACTAAATGACATTTACTGTAGGATTCACTTGATATGAGGTATCTTGTGTAATCAAACTCATAGAAATAGAAAGCATAA

TGGTAGTTGCCAGGGGCTGGGAGGAAGGA
