# Supplementary material for: Chromothripsis during telomere crisis is independent of NHEJ, and consistent with a replicative origin
Source: HighWire-hosted journal article supplement (doi:10.1101/gr.240705.118), 2019-03-14
Supplement: Supplemental_file_1.zip [file contig.4.DB84_length_1290_mean_cov_8.48837209302.docx]

**DB84_length_1290_mean_cov_8.48837209302**

ATTAAAATTCTGTTTGCTTAGTTTGAACTTTAAAGTGCAATTCCTTTTCTAGTGAAAGATAATAGCTATATTTAATAGTTTAACTTGAA
 >chr5:22530608-22530874 + E=7e-148
CTTTCCAGAAATGACTGAATGAATTTCTTAAATCATCTTAAAACTAACATTAGTGATAAAAATAATAATATATTTTAAAATTCAGAGTT

TTATCATTGGTAACAAGAAGATGTTGTAATTCTATCATCTCAATGCTGTAGTTGTACAAGTAAATAATAAATAACACCACTCAAAC|TT
 >
|ATAAAATATTAGCACACCAGAAAAATAATATGTAGATTGCAGGTACAGATGGCAAAAGAAATTCCAATTCACACCAAAGAATCCGGAA
chr5:22531751-22532467 + E=0e+00 p=0e+00
AAGACTCAAAAATGGAGGCAACTGGTACCTTCCAATGTAAGGAAACACACTGGTGTAAAAATAGAAAGATTGGCTGAAAGTCTGTATTA

GAAGCAGCTAGATCCCAAATTCCCTATGATTTCCTGCACAGCCAGAAAGCAACTCCTTCCACACCATGACTGGCAGTTTGAGTTTACAC

CTGGAGACTGCAACGGAGAGTCTCTGGACTGTGGTTCACCAGGCAGGGCTGAAGGCTGGGATGGCATTCTGAGAATGGGGATTATCAGA

GGAATCTCTCAAATCCTGTAAAGTTAGGAAGAAATCGATATCTCAGGGGCTTTGAGGGACAAGTCACATGGAGCTGCATAAGAATAAGA

AATAGGAAATAAGAGAAAATAGGAATAGGAGAGAAAACATTAAGCATGATGTGTACTCAAACACAGCCTGCCTGGCCTTTGGATGCTCG

CCCTGGCACAGTTACACATGGACCTTCTGTTACTGGTCAACTCCTTTGTACGTTTTCAAGGATGTCTGTTAAGAAAGGAATTTTACCTG

CACGACATGGCACATGTGTTAGAGGAGCTATGGTTTGATTTGCTTTGGCATGGGCAGTTCTAACAGATAAATTATATAAATAGGATATA

TAT|TAATTA|ATAAAATATTAGCACACCAGAAA|AATAATA|AAAGCATAAAGGATAAAATATATTAAATAAAAATATAATATTATCA
 >chr5:22531753-22531783 + E=5e-06 p=1e-02 >chr5:22533014-22533295 + E=7e-15
TAGTCCAAAAGTATACAGGGCAAATTACTAGCCTATTTGAAACTTTAAAGAGGTATATCCTGAAAATTTTGTTGCTACTAAAATTATCA
7
AAGAAAATAGATGTTCCCAGGTATTGCACCCTGTCTTTGTTATTTTTTTCTTTTTTCTTTTTCCTTCATCCATTGGCTGTTTTTCTCCT

GTATCAGTGGTTCTCAACAGGGAGAGATTTGACAATGTCAGGGGACATTT
