# Supplementary material for: Chromothripsis during telomere crisis is independent of NHEJ, and consistent with a replicative origin
Source: HighWire-hosted journal article supplement (doi:10.1101/gr.240705.118), 2019-03-14
Supplement: Supplemental_file_1.zip [file contig.4.DB92_length_665_mean_cov_5.23308270677.docx]

**DB92_length_665_mean_cov_5.23308270677**

AAGATTGGGGTAAGTTATTTAATCCTTTTCTCAAAAACCTAAGGGTTTTTTTGGGGATATGCTCAGGTGGCACAGCAAGCCACAAGATA
 >chr13:80931415-80931560 + E=2e-72 p=0e+00
ACATGGGCTATCTAACATTATTTCAATTTACATATATATATATATATATATATATA|TATATATATATATAT|AAATAATTTTTCAGGC
 >chr13:80932052
AATGAGACTCTGGCTCTTTCCATGTTTAGTCTATTAGGATTTGTGTTCTCAGGGAGCACTTAGGGCTACTGAGGCCTTGAGTCAATGTT
-80932304 - E=7e-140 p=0e+00
CAGACCCTGGGTTGGGTGCTTACTAATCGCTAAACTCCTAAGCCATAAGCTGACCCAACAAACCTTCCTAAAAACAGAGGAGCAGCCGG

GCT|CAGTGGCTCACGCCTGTAATCCCAGCACTTTGGGAGGCCGAGGCAGGCGGATCAC|CTGAGGTCGGGAGTTCAGGACCAGCCTGA
 >chr11:77335591-77335817 + E=4e-85
CCAACATGGAGACACCCAATCTCTACTAAAAATACAAAATTAGCCAGGCAGGGTGGCACATGCCTGTAATCCCAGCTACTTGGGAGGCT

GAGGCAGGAAAATCGCTTGAACCTGGGAGGCGGAGGTTGCAGTGAGCAGAGAC|TGTCCCATTGC|ACTCTAGCCTGGGTGACAAGAGC
 >chr11:118292468-11829
GAAACTCCGTCTCAAAAAAAAAGTGTCCATTAATTTTGGCAAATAGCC2541 + E=4e-26
