# Supplementary material for: Chromothripsis during telomere crisis is independent of NHEJ, and consistent with a replicative origin
Source: HighWire-hosted journal article supplement (doi:10.1101/gr.240705.118), 2019-03-14
Supplement: Supplemental_file_1.zip [file contig.4.DB98_length_624_mean_cov_12.3701923077.docx]

**DB98_length_624_mean_cov_12.3701923077**

TATTCTTGAAATTGGTTGTCTTTAATTTCTTTAAGTTAATTATATTTATTTAATGTGGCTCATCCAAATTTAAGCTTCTTGAATGTAAG
 >chr3:104261131-104261424 - E=1e-158
AAGGATGCTTTATTGTTAAAAATTTTTGGAACTGCATTTTGCCAAAGTTCCAAATGCAGTGCTGGAGATACAGGTATTGCCAATAATAG

CTTCTTATTTGACTAAATCTATTTCTAAATTACAATTTGTTTAGTGTATTCTAAAATGTGATTTTTTTCATCATAAGAGTAGCTGGTTC

TGCACCTTATTTTAAGGAAATTATAT|AAATATATAAATAAATAAATAAATAAATAAATAATATATAAATAAATAAATAA|TATATAAA
 >chr16:85747988-85748041 - E=4e-14 p=0e+00 >chr5:
TAATATATAAATAATATATAAATAATATTTTATATAT|TTTAAGATAAATATATAAA|TAATATTTATCTATAACATGCAATGCTGTTT
105410984-105411029 + E=3e-03 p=0e+00 >chr3:105485077-105485291 - E=
GATAATATTTTACTCACAATAGAGTTTCATTCAAAATTGGAGTCAGTCCTCTCAAACCCTGCCACTGCTTTATCAACCAAGTGTCTGCA
5e-117
ATATTCTAAATCCTTTATTGTAATATCAGCAGTGTTCACAGCATCTTCACCTGGAGTAAATTACATTTAAGAAAGCACTTTTTTGCTTT

TCTAT
