# Supplementary material for: Chromothripsis during telomere crisis is independent of NHEJ, and consistent with a replicative origin
Source: HighWire-hosted journal article supplement (doi:10.1101/gr.240705.118), 2019-03-14
Supplement: Supplemental_file_1.zip [file contig.4.DB113_length_659_mean_cov_12.8012139605.docx]

**DB113_length_659_mean_cov_12.8012139605**

CTGTTAGAAATTGCTCCCCGGGGGCCTCCGGCATGAGAACCACTCGAACCTGGGTGTCAAAGCTCGCAGCGATCCAGATC|CACACAAC
 >chrX:1
CGCACTCCAGCCTGACGACAGAGAGACTCCATCTCAAAAAAA|AAGAAAAGAAAAAAAGAAAGAAAGTGCT|CCCTTG|GGCCGGGCGC
43682321-143682373 + E=2e-01 p=2e-02 >chr9:130491079-130491107 + E=4e-02 >chr9
GGTGGCTCACGCCTGTAATCCCAGCACTTTGGGAGGCCGAGGTGGGCGGATCACGAGGTCAGGAGATCGAGACCATCCTGGCTAACACA
:136685550-136685746 - E=4e-85 p=0e+00
GTGAAACCCTGTCTCTACTAAAAATACAAAAAAAATTAGCCGGGCGTGGTGGTAGGTGCCTGTAGTCCCAGCTGCTTGGGAGGCTGAGG

CAGGAGAA|TGGCCAACATGGTGAAACCCTGCCTCTACTAAAAAATACAAAAAAATTAGCTGGGCGTGGTGGCACATGCCTGTAATCCC
 >chr10:12407859-12408158 + E=4e-168
AGCTACTCGGGAGGCTGAGGTGGGAGAATCCCTGGAACCTGGGAGCCGGAGGCTGCAGTGAGCAGAGATCGCACCAATGCACTCCAGTC

TGGGTGACAGAATGAGACTCCGTCTCAAAAAAACACGTTTCCTTCTCCTCAGTGTCAGTGTCACATTCACCTCTTGAAACATAGCTGTT

ATCTTTTGGGCAGGCTTCCTGTAGAAGTTGGGTCATATGTT
