# Supplementary material for: Chromothripsis during telomere crisis is independent of NHEJ, and consistent with a replicative origin
Source: HighWire-hosted journal article supplement (doi:10.1101/gr.240705.118), 2019-03-14
Supplement: Supplemental_file_1.zip [file contig.4.DB113_length_911_mean_cov_17.4533479693.docx]

**DB113_length_911_mean_cov_17.4533479693**

AGTGAGGCACCCAGCAAGGCCCCCAAGGGAAAAGAGGAAAGGAAGACCCCCTACACAGCCAGTCTGCTAGGAGAGGCCCTGGGCTTCTC
 >chr1:110793337-110793529 + E=1e-103
TAGGAGGAGGAGGAGAGGAGCGGCTGGGGTAGGGGAGGCTAGGCCAAGCCCATCAGGTGGAGAAGCAGGTGGCTGTTCCTGAAGCCTCA

AGCCCATGG|ACTGC|ATGCTAGTCCGGCTTGGCTTAAAGAGTCCACTTAGAGGACTTCAAGCTCCACAGGCCACGAACGTTGTTATGG
 >chr1:110793776-110793905 + E=1e-65
TTTGGCTGTGTCCCTACTCAAATCTCATCTTGAATTGTAGCACCCATA|ATT|TTTTTCAGTGACATTAAGTACATTCACATATTGTGC
 >chr1:110792400-110792723 + E=2e-179
AACCTATATAGCCATCCATCTCCAGAACTCTTTCTGTCTTCCCAAACTGAGACTCTGCACCCATTAAACAATGACTCCTCATTCTCTTC

TCCCCCAGTCCCTAGCAACCAGCATTCTACTGTCTTTGTGAATTTGACTAAGTACCCCATATAAGTGGAATCATACGTTTTCAAGTCCC

ACCTTGAAGCTGTTATCAGCGAACACTTTCCTTAATTAAAAATTAACACCTTAGCAAGAATTAGTCTCTGACAACAGGAATGGGTCATC

ACTCCTTTTCTCATG|CC|CATAATTCCCATGTGTTGTGGGAAGACCTGGTGGGAAGTAATTGAATCATGGGGGCAGGTCTTTCCCATG
 >chr1:110793896-110794173 + E=1e-154
CTGTTCTCACAATAGTGAATACATCTCATGAGAAATGATGGTTTTATAAAGGGGAGTTCCCCTGCACACTCTCTCTTGCCTGCCGCCAT

GTAAGACATGTCTTTGCTCCTCCTTCACCTTTTGCCATGATTGTGAGGCACCCCCAGCCATGTGGAACTGTGAGTCCATTAAACCTCTT

TCTTTTGTAAATAACTCAGTCTCAGAT
