# Supplementary material for: Chromothripsis during telomere crisis is independent of NHEJ, and consistent with a replicative origin
Source: HighWire-hosted journal article supplement (doi:10.1101/gr.240705.118), 2019-03-14
Supplement: Supplemental_file_1.zip [file contig.4.DB115_length_1368_mean_cov_12.8961988304.docx]

**DB115_length_1368_mean_cov_12.8961988304**

TTGTATACTGAGGCACACTGTTTCTAGAATGAAATACAGAGGGACAGATTACAGCCTGCAAAATAACAGGAACCAGATAGAAATATGAC
 >chr18:55476389-55476701 - E=2e-175
CTTCAGAAGCCCTTAACATAGTGGTGGGTTGTGATAAATGAGATATTTCTGGAAACCAATTTGGTAAATGCATAAACATCCAAGAATAG

CAAGTGATTAAAGAAATCATCAGCAGGAGAAAATACTATGCAACTATTGAGAATTATGACCATGCCAACCATTCATTCATTCTATAAGA

ATTAATAAGCACCTGGAATGCTCTATTTAATGCTGTA|TGCCAAAA|TCATTGAGACACATTTAGTTACTTGATGTTTAATATTTCTTT
 >chr18:55475000-55475320 - E=3e-180
TGCAATCTAATTTCTTATTTTAAAATGTTAGTCAGAAAAAAAGAAGTCATTAAGTAGTAAAGGAAGTGGAAAGCCTTGTAACTTAGAAG

GAATGTTGGAAAACTCATTGTGCCAGAGAAAATAGAATATATCATCTGTATTTGTTGTTTTAAAAGCCATTTCGAAGGATGTGGGGCAG

ATATTTGAAAATTCTAATGTCACTTATTGCTAGGACAGATTCACATAAGAGGTGTCTTATCAGATTTAAAATTCTGGATCTGGTCTGGA

T|AA|CATCAAGTAACTAAATGTGTCTCAATGATTTTGGCAATCACACAGACTTAACATGCATAAAATGTTACAGGAGGAATTATTCAT
 >chr18:55475282-55475821 + E=4e-301
GTTATTAAAATTCACTTCCCTTTCTTTTGTATTCATAAGCATGCAAATGTGTAGGATTGTCTACCATTCTTTTCTACAAGGAAGAGATT

TTAATAAACCACTTACTGTATTTCTCTATGGAAATGTAATAAACATTACCTGATGTTGATAATGTAACACCAGTTAAACTTAATGAGTA

AAATTAATACAGACAGTTCATGAATAATTTTCCAAAATAACTTGCGATTGTTGTTAGTATATGTCGCCATGTGTTCCTGTAGTTGTAGG

AAGTTTGTATGTATTATCTTAGGCTCTGTTCTCATCATTTTCCATTGTGTCATGAAAACACATTTACCTTTTGGACTTTATCCCTCTTC

CTTCCTGACCTGCACCCTAAATGTGGCTAATTCCAGGTTGCTGTGAATAGAAGTTTACTAGATTTTTTTTTTGAGACAGTCTCACTCTG

T|C|ACCCCAAAATTTGGCATGGTTCTTTCAGAAAGGACAAGGTCGGTTTCCAGGTGAGCTAATTCCTTCATCAGCAACACCAGCTGAT
 >chr18:55474050-55474264 - E=1e-116
GCACTCTGAGAACCTCCTTCCTAAGATGAGGAAGACTTACATAGGGGAAGTGTTCTAGGATAAGGTTGTGGAGTTGTGTGGGTGTGGGT

GTTTTGTTTTGGTTTTGTTTTTTTTTTTAATTTTTTTTT
