# Supplementary material for: Chromothripsis during telomere crisis is independent of NHEJ, and consistent with a replicative origin
Source: HighWire-hosted journal article supplement (doi:10.1101/gr.240705.118), 2019-03-14
Supplement: Supplemental_file_1.zip [file contig.4.DB116_length_864_mean_cov_6.09259259259.docx]

**DB116_length_864_mean_cov_6.09259259259**

TGTGAGAGAGATGTGGGATTGAATTATGCAATGTATATATCACACTTTACACAGTATCCAACACAGAAATAAATGCCAGATTCATGGTT
 >chr2:49445134-49445366 - E=1e-124
GTTGTTTTTTTTCATCTCCCTCTAGAGTGTCTTCTGCCCTCTAATGACCTACCTGCCCCATGAGCCTCACTCTTCATTGCCTAGGGTAG

GTAATCAGCTTCCTTCCCCTCACCTTCTGCCATCTGTCAGGAATAGTCCT|ATGG|CTGGGTCAAATGGTATTTCTAGTTCTAGATCCT
 >chr2:49442265-49442561 - E=4e-163 p
TGAGGAATCACCACACTGTCTTCCACAATGGTTGAACTAGTTTACACTCGCACCAGCAGTGTAAAAGCATTCCTATTTCTCCACATCCT
=0e+00
CTCCAGTACCTGTAGTTTCCTGACTTTTTAATGATCGCCATTCTAACTGGTATGAGATGGTATCTCATTGTGGTTTTGATTTGCATTTC

TCTGCTGACCAGTGATGATGAGGATTTTTTCACATGTCTGTTGGCTGCATAAATGTCTTCTTTTGAGAAGTGTCTGTTCAT|CCAC|TT
 >
TGCCCACTTTTTAATGAGGTTGTTTGTTTTTCTCTTGTAAATTTGTC|AGATGCATAGTT|TGAAGAGTTCCTTAATCATTTTTGAAAC
chrX:124575077-124575126 + E=1e-11 >chr10:20569625-20569900 +
AAAAATGTTAAGGGATTTTAAACATATGATTATTTTTAATTTTATGCCTTTTCAGTACTAAACACCCATTTCATTGCTGATTCCTGTCT
E=2e-153
AAGAAGCCATTCACGTCAGCATGGCGATAGAAAGAATGAAAAAACCCTGCTGAATCATACAGTAATTTTCTTTAAAGCACATAGTAGTT

ACATAAATATATATATATAAATATATTTTTGTTTATAACTAACACAAGGCAGGATCTTGTGACTCTAAG
