# Supplementary material for: Chromothripsis during telomere crisis is independent of NHEJ, and consistent with a replicative origin
Source: HighWire-hosted journal article supplement (doi:10.1101/gr.240705.118), 2019-03-14
Supplement: Supplemental_file_1.zip [file contig.5.DB40_length_632_mean_cov_9.21518987342.docx]

**DB40_length_632_mean_cov_9.21518987342**

AGTGAAGCTGTGTTCTCATCAGCAGAGACTCGCAGAGCATGGCGAGGGCGCAGCTGCGTTCTTCTGTGCACAGATGTCTGGAGTACCGC
 >chr18:10632-10919 - E=7e-134
GGAGGCGGAGCAGCGTTCTCCTCAGCACAGACCCGGGCGGGCGGGCAGTCCAGGGGCACCCCGAAGGTAGAGCTGTGTCCTCATCAGGA

CAGACCTTGCGGGCATTACCTCGCTTTGGGACAACTCGGGGCCAAAGCGACGGTAAATAAAATTCTTCCTCTTTGCTGCCCTGAACAAT

CAGGGTCAGAGTCCAGTTA|G|GGTTAGGGTCGGGGTCGGGGTCGGGGTCGGGGT|TAGGGGTTAGGGGTTAGGGTTAGGGGTTAG|G|
 >chr10:135524558-135524592 + E=1e-08 p=0e+00 >chr12:133817862-1
GCAATTTGTGACATGTTTAGGAG|CA|GTAATGAATCCCTTATCTAGCCTGATGATTTTGCCGAGTAATGGGTAAAAGAAAGTAAAGTG
33817893 + E=6e-04 >chr11:125648384-125648410 - E=6e-04 >chr11:125648205-125648463 +
GATCTTAGCCTCCTTACTCTAAGAAATGGACAAAACAGGTCTGGCAGGAGGCGAAACCCCTAGGATTCTATAATAAGAATGGATTACAG
E=2e-140
GCCTCTCTGAAGATGAAGGAAAGGTTTGCTCCTAAACATGTCACAAATTGCCTGTTTACCAAGGACTTCAGAGAAGCCATGATTGTACC

TTTTATAGGGTCATGA
