# Supplementary material for: Chromothripsis during telomere crisis is independent of NHEJ, and consistent with a replicative origin
Source: HighWire-hosted journal article supplement (doi:10.1101/gr.240705.118), 2019-03-14
Supplement: Supplemental_file_1.zip [file contig.5.DB46_length_419_mean_cov_5.03102625298.docx]

**DB46_length_419_mean_cov_5.03102625298**

CCGATCT|AGGGTGGCTGTGAGGATTAAATGCATTTGTACACGCCTGTAATCCCAGCACTTTGGGAGGCCGAGGCAGGCAGATC|ACTT
 >chr3:149799477-149799566 + E=3e-31 p=0e+00 >ch
GAGGTCAGGAG|TTTGAGACCAGCCTGGCCAACATGGTGAAACCCTGCCTTTACTAAAAATACAAAAATTAGCTGGGCTTGGTTGCAGG
r20:23244854-23244964 - E=1e-33 p=0e+00
CACCTGTAATCCCAGCTG|AAAATACAAAAATTAGCTGGGCTTGGTTGCAGGCACCTGTAATCCCAGCTGCTCGGGAGGCTGAAGCAGA
 >chr8:38025947-38026032 + E=1e-27
AGAATCACTTGAACC|CTGGGACACAGA|TTGCAGTGAGCCCAGATTGCGCTATTGCACTCCAGCCTGGGTGACAGTG|ACA|GAACAT
 >chr10:121629895-121629944 + E=6e-12 >chr5
CCTAAATGCCTTAACTTAATCATTCCGCCTTCTATGCATGTAACAAAATATCATATGTACCCAATAAATAT:3233050-3233127 - E=8e-35
