# Supplementary material for: Chromothripsis during telomere crisis is independent of NHEJ, and consistent with a replicative origin
Source: HighWire-hosted journal article supplement (doi:10.1101/gr.240705.118), 2019-03-14
Supplement: Supplemental_file_1.zip [file contig.5.DB46_length_762_mean_cov_7.27296587927.docx]

**DB46_length_762_mean_cov_7.27296587927**

TA|CTGAATGAGAAGCCGAGTGACTGAATGAATGTATGAATGAAGGAACAGGTCAGTAACTGGCGGTTCCCGACGTTGGAGCCGACTAA
 >chr15:99791268-99791425 + E=1e-76
ATTACCCCTTCAAGACGCTAAGCAAAAGCCACTCCGTAGACATCAAACCCCACGCCGGAGCCGGAAGCAAG|G|CAAAACACTGAAAAG
 >chr15:9979677
TTACATTAAGCTTCCCAAGTGCAT|CT|GTGTTCTCGCGCTTTCACGATAGGCGCGGGAAAATGCTCGTTTGCCAAGCGATCTGTGTAT
8-99796819 - E=7e-13 >chr15:99791370-99791537 - E=1e-85
TGGCCGAGAGCGCTACTTCCTCTATGCTGGCCCCGCCCGCGGCTCTACTCTTGCTTCCGGCTCCGGCGTGGGGTTTGATGTCTACGGAG

TGGCTTTTGCTTAGC|CT|TTCTGCATATTAGGCAACTGGAGACC|CAGAG|TGAGACCCTGTCTCTAAAAAAAAATAAGAAGAAAGAA
 >chr15:99795100-99795131 + E=8e-07 >chr15:99795542-99795910 + E=1e-
AAGAATAAAGAGATAAAGAAAAAAATCAGAATATAGGACAATATTTATATATTAGGAAGTGAAGAAAATGAAGCTATTAGTGCTCTAGA
209
TATAAATAATATATATTTTAATATTTTTGAAGTACCTTAAGCTAAATACAAAATGAGGTAGTTCATAAAAGAAATGGGGTTTGCTGCAT

TTGATTTTTAAGCTTCTCCTTTGGTTGTATGTTATGAAACTGGTCACTGTTTTTCTTACACAAGGTTTCCTATCTCAAGTGCAAAAACT

ATTTTTTTCCATTAGGACTATTTCTAATAAGTAATAAATATTGCTTAATCAGAGTATTT
