# Supplementary material for: Chromothripsis during telomere crisis is independent of NHEJ, and consistent with a replicative origin
Source: HighWire-hosted journal article supplement (doi:10.1101/gr.240705.118), 2019-03-14
Supplement: Supplemental_file_1.zip [file contig.5.DB51_length_785_mean_cov_5.87898089172.docx]

**DB51_length_785_mean_cov_5.87898089172**

AAACAGAGATGGCTTGACCACAGTGACCAGCCTGCACCCTAATGTCCTCCAGGACTTTCCCAGAAATTCA|CG|GGAAATGTAACTCAG
 >chr18:68506673-68506745 + E=2e-31 >chr18:67127850-
TTTAAGGCTTTTCTGTGCTTTCCTCAAACATAGTACCATATTATTTTGCACGTGCACACACACACAGAAACAAGACAGGTTCAAAAGAC
67128248 - E=1e-224
CAAGTATGAAGCAGAAAGTGTTGCTGCTCTGACAGTTAAAAAGTGGGCATGATCGAAGTCAAGATGAGACTGCAGGAAAGGCAGAGGTA

GGCTTTTAAATGATGCTTATGAAGAATGAAAGAGGGCAATACAATTATAAGGCAAGAAGCCACTATTTTAACACGTCTTTATGAGTAGA

AAAGTAGTATATTCAGTGGTTTAGTTGCAAAATAATAAAAACACATAACTGATTATATAAATTTACCAAACCAATGAGTTTGCCAGATA

TCAACAATTTGTTACAATTTCTTCA|CT|AATCTGGCAAGAAAATCACAGAAGATGATAATG|CTGAAAGGAAT|TTAAGTATACCAGA
 >chr18:68489469-68489502 - E=5e-05 p=3e-02 >chr18:684954
TAATTTAGGAACGTTATTAGAAAATAACTGCCTTCATGTTT|TG|GCAGGTCAGAAACTAAATGAAATAGAAGAGGCTTGAAAATAAGC
58-68495515 - E=2e-22 >chr18:67128373-67128589 - E=4e-115
AAAAATAAACTCATAAAACATAAAAGTAATTCTGGGAAGCATTTCTGAGTTCCAGATAAGATTGCAAGTGCTTCTAATAAAATACATTT

ATAAGTTTGTGAGTGTGTTTCTGAGAGAGAGACAATGTGTGTGTGTGTTTCTGAAGTATATGTGTTCATCAGAACCAAAAA
