# Supplementary material for: Chromothripsis during telomere crisis is independent of NHEJ, and consistent with a replicative origin
Source: HighWire-hosted journal article supplement (doi:10.1101/gr.240705.118), 2019-03-14
Supplement: Supplemental_file_1.zip [file contig.5.DB57_length_1481_mean_cov_15.1100607698.docx]

**DB57_length_1481_mean_cov_15.1100607698**

GCCCGAACACCTGAACCCAACACCGCGCAAAAGAACGAATCTAACTCA|AAAAAAAAAAAAAAAAAAAATAACCAACTATCATATAAAT
 >chr7:146028395-146028641 + E=9e-133 p=
TATTCGGCCCTTTATTGAGTATATTCCATTTATCCAGCAGTGTGATTTCTGGCTGTCTCAGTTATTCAGTATATAGGCTCAGATCAGAG
5e-02
TAAGCAGAAGAGGACTTTGAACATCAGAGAGCAGTCAGAACTGGAGAATCTACTTGCAGATGAGGGATTTATTACAGGTCTAGTGACTC

ATTGCTGTTTGGTATCTCATCCTCCA|GG|AGTGCAGTGGCGTGATCATGGCTCACTGCAACCTCTGCCTCCTGGGCTCGAGTGATCCT
 >chr7:147215071-147215606 + E=2e-309
CCCACCTCACCGTGTCTGTTTTGTTTAAGAGTATATAGTTATCAATCCTTAAAGCCGAATTTCATTCTTGGTAGTTACTGTTAAAATTA

AGCATGAACAATTGAAAGATTTTACAAAGTATATCTATCATATACCTGCGGTGTATCATCCTTGGAGAAGAAATGAACATACACTGAAC

ATAGAAACAACTAAACTTTCTAGATAAATGGAACTAAGAGACTAACTTCTGTTTCAAATGATGACGAATTTCAGAAAGAGAAAAAATTA

AGTAGAAAAAAAAGGAGAATGTGAGAGACTGGGGAGAGAAAAAATAAATGAGAGAAGGTGGTAGACCACTAGGATGAAGAAGCAGAAGA

TGAAGGAGACAGGCAAGATGCTGACCTCTTAGCTCAGTCAAGGTCTGGACTTTGGGGGCCTGTCCTAGCATCATCTCTTGCAGTCTAGC

ACATGTACATACAGATGCTATGAGAACAT|TTTTAAAAGATTT|TTTCTTAGTGCCTTATCAAAGAGAAGCCTTCTTGGGCACCATTAG
 >chr7:141195250-141195387 + E=3e-70
TGGGTGGTAAATTGGTGGGGGTGCTTTAGAGGACAACTTGACAATATCAAGATTTGAAAGGCACTTGCAGAAATTCCCTTTCTGGAAA|

TTTT|ATAAGGTCTCTTTTCAGGGTGGTTGA|AATTTTTAAAAG|ATTTCCTTGTCTGCTATCCTCATAACTGGGACTCCCTTTATTTC
>chr7:147215804-147215834 - E=6e-06 >chr7:147207111-147207577 - E=5e-268
TGAAGTCCTTTGTCAGTGTATTCTGCAGGGATCTCCTTGACTATGTCCTCTGTCCTGGTGAGGGTGAAGAGACTGAAACTCTTGATCAT

GAGGTAATGGAAAGTCTGCATGGCTGGTGGCTTACATGGCAAGGATAAGGTGGAATGGCCAGCCAATTTGCTCTGTAAAAGGCCACTAA

ATACTGGGTTTTAGCCCTCAGAGTCTGGGGAACTTGAAGTCAAAGAAGAGAAAGAATTAGAATACGCAGAACCCCAGACAGGTTTCATC

TTCTGATCAGATAGAAAGGCTAAGAGAGAAAACAGATTCCCTAGTCACACTGGCACGAATCCTCTGCTCTGGAATCTTCTCATAAGCCC

AGTGAAATTCAGATTCCATGACTCTATTATAGACCTTATGAATCAGAAGGGATGGTGCCCAGGAGT
