# Supplementary material for: Chromothripsis during telomere crisis is independent of NHEJ, and consistent with a replicative origin
Source: HighWire-hosted journal article supplement (doi:10.1101/gr.240705.118), 2019-03-14
Supplement: Supplemental_file_1.zip [file contig.5.DB57_length_1559_mean_cov_19.9146889031.docx]

**DB57_length_1559_mean_cov_19.9146889031**

AAACCAGAAACCAAGAAAGAAACAAACAAAAGTAAAAAA|AAAAAAGTGTAAATATCCATAGAGACAGCAATCAGTAAATACGTGAAGT
 >chr7:141699954-141700481 - E=1e-304
AAAATATAATTCAATGTTATTTAAAATCATCACACGGCAGGTGTTTTTAATTTAACAAATTATTTGATACTCCTCTCTTCAAGAGGTAG

GGCGAGTCCCCACCACCTCACCCTCTGAGGATGAGCTGGACTTAGTGACTCACTTTCAACAGATAGGATGTGGAGAAGGGATGGCATCT

AACTTCCAAGACTAGGCATTACAGCTTCCTCCTTGCTCTTTCTCTTGGATCATTTCCTGAAGAAACCAGTTACCATGCCATCATAACAT

TCAAGCAGGACTATGGAAATTTCTAGCAAAGAACTGAGGTCTTCTGCTAAGAGCCATCTGAGTGAGGTCCCTTGAAAGCAAGCCTCTAC

CCCTATTCAAGCCTTCACATGACTACAGTCCTGGCTGACATATTGGCTGGATTCATGAGAGACCCTAAATCAGCACCACTCGGCTAACT

CACCCCCATATTTCTGACCTACATAAATTGGGA|CTTGTAAATTTACAAG|TATAAAGGAAAATTCAGTGACTTGGAGATTTGAGGTTT
 >chr7:141740897-141741034 - E=3e-70
GCATAAGGTAATTTTTGAATCACAAGAAAGAAATCTTAGTGGGAGAAAAGAAATAGGAAGTTGAAATTCTAGGAGGGAGGAGAGTCAAG

GTTCTCTAGA|CTTCCTTTATACA|GGCTCATGCCTGTAATCCCAGCACTTTGGGAGGCTGAGGCATGTGGATCACGAGGTCAGGACCT
 >chr19:40463158-40463378 + E=4e-120
CAAGACCAGTCTGGCCAACATGGTGAAACCCCGTGTCTACTAAAAATACAAAAATTAGCTGGGCATGGTGGCACGCATCTGTAATCCCA

GCTGCTCGGGATTACAAAAAACAAGAACAGCTAAGAAAGTTCTGAAAAACTCAGGAGGCTGAGGCAA|TCACATCCCTTTTGTCCAATC
 >chr10:931213-93132
ATGCTTCTCCACAACTGTCAACATCTGCATTAGACTTCGCAAAAAAAAAATACAGTTTTCCCTGTTTCTTTGGTTCTTCCTTTGTGG|A
3 + E=5e-54
G|TGACTAGATCCTTCTTATAAATGCTCTTCAGGTAGCCCAAAGTTCTCCTTTGTATAACCCATTATAATTAGATTATACATATAATTG
>chr7:137422702-137423172 - E=2e-264
TGTAGAGGTATGTATTTAATATGTGTCTCTCCTAGTAGCTTGGAGTCAGTATAGCACAGCAGCTAAGGGTCCAGCCCTCGAGATCTGCT

TTCAAATTCTACTTTTGTCACTTAGTATCTACATTACACCGATTAACTTAATCAGTGTCATGTGGTCCTGCTAACTGCATTAATTTGTC

TGTATTTCATTCCGCATCTACAAAATGGTAATAAACATAGGACATATTTTATAGGGCTATATATTGAATGTATTAAATAAGAAAATCCT

TGAGTATTGCTTAGCACTGTGCCTAGAACATGAAAACTCTTAATAAAGCTTGGCTATTAGTGTTGCTAAACGGTAAAGACTGTTTCTGT

CTTATCCCTTGTGTTATCCCCAGTT|GTTTGGAGAGGACGTGTTGCACGCAGATG
