# Supplementary material for: Chromothripsis during telomere crisis is independent of NHEJ, and consistent with a replicative origin
Source: HighWire-hosted journal article supplement (doi:10.1101/gr.240705.118), 2019-03-14
Supplement: Supplemental_file_1.zip [file contig.5.DB73_length_863_mean_cov_13.1448435689.docx]

**DB73_length_863_mean_cov_13.1448435689**

GAACTTGTGAAAAAGAGAGTGGGGAATTTCGATCGATTTTGAACTTGCTTTGCTAGCTACAATCC|TT|CAAATATTGAATCTTTTAGG
 >chr3:81208254-81208321 - E=2e-28 p=4e-02 >chr3:82287746-822878
CAGAGAATATACAATAAATATTTAAGTTGTATAAAAACCTAAGAGAGTAAAGAAAA|AAA|TAAAATTCTTTGAACAAGCAAATGCTGA
27 + E=7e-37 p=2e-02 >chr3:80297191-80297584 + E=2e
GGGATTTTGTTGCCACCAGGCATGCCTTGGAGGAACTCCTGAAGGAAGCAGTAAACACAGAAAAGAAAAATCATTACCAGCCACTACAA
-218 p=2e-02
AAACACACTAAAGTACACAGACCAATGACACTATGAAGTAACTACATTAACAAGTCTGCAAAATTAACCAGCTAGCACTATGATGACAG

GATCAAATTCACACATAACAACATTAACCTTAAATGTAAATGGGCAAAATGCTCCAATTGAAAGATACAGAATGGCAAGCTGATTAAAA

AGACAAGATTCATCAGTGTGCTTTTTTCAAGAGATACATTTCACATTCAAAGACACTCATAGGCTCAAAATAAACGGATGGAGGGGAAT

TTGCC|A|TTACTCCTTCACTTATGAAGCTTAGTTTGGCTGGATATGAAATTGTGGGTTGAAAATTCTTTTC|T|ATCTGCCAAGGACT
 >chr3:78726182-78726248 - E=8e-28 >chr3:82288181
CCAAGTAAGTAGTTGATAGAAATAACAGTGCATAATGAGTAGACCAGTCTACATAGAGACTACAGGCCAAATTGGAACTATCTCAATCT
-82288440 + E=7e-138
TTGAAATTAAATTCAGGTAATAGGACATTGCGAGTTCCCAGGAGCCCATAAGAAGCAAGTAAAAAATTATCTCTGAAGTGAGACATAAT

CCTAGGCCTTGCATTATTTGTGTAATTTTTCAAGTACAGTGTGCTGCTAGCGAAAATAATAAAAAT|AAAA
