# Supplementary material for: Chromothripsis during telomere crisis is independent of NHEJ, and consistent with a replicative origin
Source: HighWire-hosted journal article supplement (doi:10.1101/gr.240705.118), 2019-03-14
Supplement: Supplemental_file_1.zip [file contig.5.DB84_length_668_mean_cov_10.0988023952.docx]

**DB84_length_668_mean_cov_10.0988023952**

CTGTGTGTATATTTTCAAATGGCCACCTTAACAGAGGTAGTTAAAATTCCTATATTAAAGCACTTATTTTGAACAATAATGATCCTATA
 >chr2:57229880-57230258 + E=1e-209 p=1e-02
TAGATGGCACAAATATATATACACAATGTAATATTTCACAAGACATTCATAAAATATTTTAGAAATATTTTGGTGATACTTAAATTTTT

ACATATACGTGTTAAGAAATACTAAAATTTATTTAGCTCTATATAATGTTTATATTAAATATAACCATTATTTAAAGTGCCTGTGTGAT

TTTCTTGATTTCTTAAGCAAACATTGAGTATATACAATTTAAAATTTGCTTGATTCAAAAGTAATATAAAATGTATTGAGTAATTTATA

TAAAGAGAAGTGCTGGCATAAT|CATGAGAT|TGTGTATATATATATGTGTGTGTGTATACATATATATGGT|GT|GTGTATATATATG
 >chr12:17389921-17389961 - E=3e-09 p=0e+00 >chr10:127
TGTGTGTATATATGGTATCTGTGTATAT|AC|ATGTATTCTGTTGTCATTGGATGGTATGTT|ATCTATATCT|ATATATATATAAACC
831726-127831767 + E=7e-07 p=2e-02 >chr18:41611308-41611338 - E=3e-03 p=0e+00 >chr2
TATGTTATATATATAAAACATATATATATATAAAACCAATGTTACATATATATATAGAACATACCACCCAACGGCAACAGAATACACAT
:57234083-57234240 + E=1e-79
TCTTCTCAAGTAAACATGGAATATTTTCCAGGATAGATCATATGTTAGCCCAT
