# Supplementary material for: Chromothripsis during telomere crisis is independent of NHEJ, and consistent with a replicative origin
Source: HighWire-hosted journal article supplement (doi:10.1101/gr.240705.118), 2019-03-14
Supplement: Supplemental_file_1.zip [file contig.6.DB57_length_1378_mean_cov_18.9622641509.docx]

**DB57_length_1378_mean_cov_18.9622641509**

TTAAATAGAATTCTAGTATCTCGGGTAGGAAATTTATTACAGGCAACCCTAAGAAGATATATTCCCTAAACTCTCCTTCAGGTGATGGG
 >chr7:146142970-146143509 + E=6e-306
ATTAATCTTGGTAAAGTGACTAAGTTGCTTCTTGATGGTTGGTACATTTTGAAAAAGAAGAATCACATTAACTCCAGAGCAGAAAAGAA

CCGTAGATCATTCTTACTAAGTTCATTGGTCTTACATGTAAATTGAGAAAGATTGCTGAAGGCAAGATTGCCCCAAGGAATTTAACTTG

AAATCAAGAGGCTACATAAATGTAAAGTGCTACTGCTTAAATAAAAAATATTATGTTTTAATAATAATCATGATAATATGACACAGTAT

GAAGCAAATATAGTGAAAACTAGAAAACAATCTTGGAAACAGTTGCTACATTGTTATTAAGGACTAAACCAATTTAGAGGATCGTGGCT

GTGAACATTTTAATATCCCACTCAGCTCCAAATTATCTAGAGAAATCTTCTACACATTCTACAATATGGAATGCCCAAGGCTGAGGGAG

TTG|CA|AAACAAAACAAAACAAAAAATCTGTCCTATATTAACATAAGTATATTAAAATTTGACAGACCAGTTGCTGTACTTTTTGGAT
 >chr7:146137219-146137344 + E=4e-63 p=1e-02
TGGTTTTTGAAAACATAGACTTTAGTAGTAAGAAACTTAGT|CTAAAAA|AAACTTAGTGGAGTAAAAGTAAATGAAGATGAGTACTTT
 >chr7:146137335-146137406 + E=1e-30 p=
TAAAATTTAAAGTGTGGTCAGTTAAAACTT|AT|CTTCATTTACTTTTACTCCACTAAGTTTCTTACTACTAAAGTCTATGTTT|ATTA
2e-02 >chr7:146137313-146137365 - E=3e-19 >c
AAAGTGAATAAGAGGTACAAAGATGGAAAATCAGTAATGGTTATTGCTCACCAGTCAGGTCTGTCCCATTCCACCATAGCCATGATCTC
hr7:147363870-147364078 + E=6e-113
AAAGAATGAGAACAAAATGATGGAAGCTGAAAAGATCTTCTTCATTGAAGGCAATGAGACTAACAACAGTTCAGGAAGAGCCTATATCA

GATATGGAGAAACTTCTAATGACCTG|TAAATGACCAG|GTGTCAGATAACTGAAGTAAATGGTATTTAACAGCATGGGGTTCCAATAA
 >chr7:146052424-146052793 + E=9e-210
CACAGGAGAACACAGGAGCAACCTTCTAGGCTTTATTTCATTCAAGTCCATAAAGTCCCCTGTGGTCGCAGCAGTGCATATTTAAAATC

AGTTAATCATGTTACTCATGGGTGTTGGATATCTTTCAAAATGGCCTCTGGTAATGAGCTATTTGTCCTGCATTGTGACAATAAGTCTC

TTCCATAATTTATAAAGCTCATGCAGATGATGGTTAGAGATTCCATAAGAAAATAATGCAGGGATGTTCTACTTCCTGCTTAATTCCTA

CTTAAATACAGTTAGATACTATAAGTGCATAAATCTACATAGTCCACAATAC
