# Supplementary material for: Chromothripsis during telomere crisis is independent of NHEJ, and consistent with a replicative origin
Source: HighWire-hosted journal article supplement (doi:10.1101/gr.240705.118), 2019-03-14
Supplement: Supplemental_file_1.zip [file contig.6.DB73_length_380_mean_cov_5.52631578947.docx]

**DB73_length_380_mean_cov_5.52631578947**

TCACATTACTGCCTGAACTTCACCTCCTGGCAGATTGCAGCGGTATTGGATTCTCATAGGAGCGTGAACCCTATTGTGAACTGCACATG
 >chr3:188352357-188352461 + E=4e-48
CGAGGGATATATTT|T|ATTACATATTATATAATTTATATAATAATATAT|ATATTATTTTA|TAATTTTTTAAATTATATATATATAT
 >chr3:96339266-96339300 - E=6e-03 p=0e+00 >chr9:75931824-75931863 +
AATTATATATATATA|ATTAAAATTTTTTAAATTATATATAAT|TT|ATATATATAAATATATATATTTTATATTTATAT|TACAA|TT
 E=4e-07 p=0e+00 >chr7:42152223-42152250 + E=9e-02 p=0e+00 >chr2:7733891-7733924 -
ACTTTTCTCCCTGGCTTTTGGTTCACTTTTTGTACTTTTAACAAGTGGGTGAATTATTTGATAATTTTGAGGAAGATTATTCTTTTAAA
 E=2e-02 >chr3:190128212-190128336 + E=3e-63
TTCAAACTAGTATGTCAATGCCTACCATTACTC
