# Supplementary material for: Chromothripsis during telomere crisis is independent of NHEJ, and consistent with a replicative origin
Source: HighWire-hosted journal article supplement (doi:10.1101/gr.240705.118), 2019-03-14
Supplement: Supplemental_file_1.zip [file contig.6.DB93_length_1077_mean_cov_21.2451253482.docx]

**DB93_length_1077_mean_cov_21.2451253482**

GCTTACAAAAATGCATGCAGTATAATAAAAGAGAAAA|AAAAAGGT|TTACACAAAAAGAGACAGAAAGATCGAGGGCGCAAACGAGAA
 >chr9:79453072-79453117 - E=4e-15 p=2e-02 >chr7_gl000195_random:56997-57368 - E=7e-201
AAACCCAGTAGGAGAAAAATTAGAGCTTTAAAAAAATCTTGACAGGGTGCGGTGGCTCACACCTGTAATCCCAGCACTTTGGGATGCTG

AGACGTGTGGATCGCCTGAGGTCAAGGGTTTGAAACCAACCTGGACAACATGGTGAAACCACCGTCTCTTCTAAAAAATACAAAATGAG

CCAGATGTGGTGGCGCATGCCTGTAATCCCAGCTACTTGGGAGACTGAGGCAGGAGAATCAATTGAACCTGGGAGGCAAAGGTTCCAAT

AAGCCGAGATCACACCACTGCACTCCTGCCTGGGATACAAGAGTGAAACTGTGTC|AAAAAAATTG|ACATCCCCTCTATTTAGAGAAC
 >chr17:50489790-50489
GCCTAATCATCTATAGCTGGGTCCCCAAAGATTTCTAAACTTTCTA|TTTTCAG|CACTTTGAGTATGTCATCCTACAACCTCTTACCT
865 - E=4e-33 >chr7_gl000195_random:67667-67765 - E=6e
GTAAGTTTTTTTGCTGAGACATCTGCTGGTCATCCTGCAGGGGTAAACTTGTACATG|TATAT|TTTTATGTACAGTATATAATATATA
-47 >chr8:43096056-43096158
GTTTGTGAACTTTGATATTTCATGTAGAGTATATAATGTATATTTGGGCTTCTTTGGTATTTAATGTACAGTATATA|A|TTGTCGGTG
- E=3e-16 >chr7_gl
GGCTTCAGAACTATAATCACAGCATGTACCGGGACCCGGGGTGCATAGCCCTGGAGGGAGGGGCAGAGCGGTGTGGACTTCCCGGCGTC
000195_random:30147-30531 - E=7e-207
CAAAGCACTGCTGAGTTCTTATGCTATGCCGACTCTTTGCCAAGGAGAATGAGTACATAGGTGGACCTAGAGGACAGGTCTGCGCTGAG

CATTGAGGAGGGTATTACCCTACATAGGCACCTTACCTTTGCCCAAATCGGGCGGGTTGTCCTCAACTGATTGGCCCTATCCTTCTCAA

GTTCCTCTTTCAGCTGCACCCAGGGTTCTTTCCAGAGCATTGCGCCTTCTGCAGCACAGGGCGCTGCCTTCTTTCCTAAACTGCTGTGG

AAACTGTCCTGATGTCTGA
