# Supplementary material for: Chromothripsis during telomere crisis is independent of NHEJ, and consistent with a replicative origin
Source: HighWire-hosted journal article supplement (doi:10.1101/gr.240705.118), 2019-03-14
Supplement: Supplemental_file_1.zip [file contig.6.DB115_length_865_mean_cov_11.6184971098.docx]

**DB115_length_865_mean_cov_11.6184971098**

TGGGAATATAACAAAANCATCTGTGGTATACTAAATGAATTAACAACAATAAAAATGACAACAAATCCCTGAGATAAACAAACAAGATC
 >chr4:93022429-93022571 - E=2e-70
TAAGCTGACAACCACATAGGAATTATGTAAAGAGCAGTAATATCTGATGCA|GA|TAAGGCATGTTTCTCTGGCAGG|GA|AAGGGAGT
 >chr4:93022332-93022358 + E=9e-04
TATTAAACAATCCCCATGACTGGTTAGCAATTCTCTCTTTAAGTATGTGAAAAGTCTTGTTTGGTAACCATCTATGCTTAAATACAAAA
 >chr4:93023010-93023198 - E=3e-101
ATTAAATCTAATTATTTTGAAATTTCTTTGCTTCCCCAAATATCAAAAACACAAGATTTAAGCAAGCTCCAAAATTGCTCAATAAATTT

|GCAGCCTACAGCAAGTGCTCAGCCA|GCTC|AATAAATTTTTTCTGTGCCAATTCTTATTGCATAAGCTGCTTTCCTCTCTGGCTACT
 >chr4:93022356-93022385 - E=1e-05 >chr4:93022833-93023023 - E=2e-102
AACCCTACACCTTAATCACATAAACTCTGAAACTAAGACTCATGTCTTAAGAAGTATTTAAACAACACTAATTTCTAAAATAGGTGATG

TAATGCAGTTATTCAGAAGGAAAAATATCTCAAAGACAT|T|AACACATGGCAGCCTACAGCAAGTGCTCAGCCAGCTCCCTGCCAGAG
 >chr4:93022095-93022394 - E=6e-168
AAACATGCCTTATCCACAGGTTATAGAACAAACACAGATGCAGCAAAATGAGTCACCAGAGGAAAACAAAAGCCTAAATTGAAGGTAAA

TGAAGCTTTGTGCACATGCATGACAAGAAATCCATTGAGCAAAACTAATTTTATATCTGTGCCAGAATGGCTGTCTTTTATGTTGGGAA

TAGGAAACAGGAGGGAAAGGAAAGTCACATAATAGTAGACCTTGAAGTGTACTAAGATAGAGAATACCTTCTG
