# Supplementary material for: Chromothripsis during telomere crisis is independent of NHEJ, and consistent with a replicative origin
Source: HighWire-hosted journal article supplement (doi:10.1101/gr.240705.118), 2019-03-14
Supplement: Supplemental_file_1.zip [file contig.7.DB53_length_1218_mean_cov_21.9942528736.docx]

**DB53_length_1218_mean_cov_21.9942528736**

TGTTTTAAAATTTTTTTTCGGAAACTCTACTTACCTTGGAGGTAATATTTTTTTTAAAAAAAGAGATGAGTAAAACATTTTTGCAGATC
 >chr8:81119898-81120271 - E=3e-212
AGTCTTAGCCATGTCCCTATATCTCAAGAACTTTCCAGGGTGGAACCATGGCTAATGGTTAGAAAATGAGAGGGGGCCTCTCCTCCCAG

AAACCTGCCCTTCTACACCATTCTCAATAGTTAGATGGAGAGTCTGTCAGATGGAAAGAACCACCCAGCATGAGAACAATGGGCCCATC

AAATATCCTTTAAGGGATGACCTTCACTGCAGCCAGCTTCTTCCAGGCCTCCAAGGTAAGAAAAGAGAGCTGGAAGTACTAACATCTAA

GAGAATCCGGTGAT|TCT|CATCAAACCTTATTTTCCTCAGAGGAAGATAATAAT|TT|ACGTATCTCTCATCTCCCTCTCTCTTTCTC
 >chr8:79152219-79152260 - E=1e-12 p=3e-02 >chr8:79152573-79152633 - E
TTTCTTCCCCCCCATGTGCTCAGTTTG|T|CTATGACTATAGAGAACTAGTTTAT|T|GGAATAAAAATAATAATATGGAAATTTGCAC
=4e-24 >chr8:79152635-79152662 + E=3e-04 >chr8:85468085-8546833
TATAAAGAGCAGGTGAAGGGTAGTGTACATAATTTTCACTGTTTTAGATAATTTGCTTTTGCAATAGAGTCATAAACATTAGAAAGAAC
7 + E=2e-136 p=3e-03
ACCAGAACTTAAAATAACCTGCTCACTTGGGCTTGCCTCTACAGCATGTCTGTATGGTCTGCACTCTCTCCCCGGATTAATTGCTTTCA

TATCATGTACATTTGCAGGAACAGTGTGACA|AATGATAAAAC|CACATCATTACTTCTATGGTATTCCTTGCAATAAAAAAGCATACA
 >chr8:81118177-81118249 + E=3e-28
TCCTGAAGAAAC|ATCA|CTTGAGCCCAGGAGTTCGACGCTGCAGTGAGCTGTGATTGCTCCACTGCACTCCAGCCTAGGTGATAAAGC
 >chr8:80763442-80763858 + E=3e-230
AAGACCCTGTCTTAAAAAAAAAAGTGGGGCAGTAGAGAAATTCTTTCTTTCTTCTCTCTGTCTCTATCTCTGTCTTTCTTCTGTCCCTC

TCTTCCTCCCCAGGCACATGTTCCAAAGAAATGCCTTGTGAGGACACAGCAAGAAGGCTACTGTCTACTGTCTAGAAGCCAGGAAGACA

GTTTCCACCAGGAACTGAATCAGCTGCCACCATAATATGGAACATTTAGCTTCCAGCACTGTGAGAAAATACAGTTGTGTTGTTAAGCC

ACTCGGTCTACAGTACTTTGCTGTGGCAGCCCAAAGCCAAAGCAAACTCACGCTCTACTAAAATTCACCTCCC
