# Supplementary material for: Chromothripsis during telomere crisis is independent of NHEJ, and consistent with a replicative origin
Source: HighWire-hosted journal article supplement (doi:10.1101/gr.240705.118), 2019-03-14
Supplement: Supplemental_file_1.zip [file contig.8.DB90_length_620_mean_cov_14.0322580645.docx]

**DB90_length_620_mean_cov_14.0322580645**

CACTCTGGCACACATCGAACCTTCTTTCTGTAAACCTCTATACACATATGAAACTCAGAATGTCCTGGTAATGCTTAGCTGTGAGGAAT
 >chr8:54506326-54506573 + E=7e-134 p=3e-03
CTCATCTTCCCCTCAGTAAGCCAGTTCTCTCAAAAGGCAGCGACCAGTCATACCGATTCTTATACCCCTTGAGTATCTCCCATGGAACA

TGGCCTGGTGCTGAACCTGTGAATTTGCAGTGAACACACAACACACAAGACTCGCCACATCAC|ATACAC|ACCACACACCCCATATAT
 >chr21:44888527-4488855
ACACA|CA|ATATGCACATACACCACATACACACCACACAC|CCCA|TATATATACACAATACACACACACCACATAGA|CATCGTATA
6 - E=1e-02 p=0e+00 >chr22:48938138-48938170 - E=2e-01 p=0e+00 >chr21:44260398-44
TACACACAAT|ACACACACCACATACACACCGTATATACACACA|AT|ACACACACCACATACACAACACACATCACACCAAATATACA
260430 - E=2e-01 p=0e+00 >chr12:56366928-56366961 + E=4e-02 p=0e+00 >chr13:31417146-
CA|ACACACAAGACACATCACACCACATACACACCACACAAGGACAAGACACATCA|CACACACCATATACACACCACACAAGACACAC
31417188 - E=3e-03 p=0e+00 >chr11:2208436-2208473 + E=2e-0
CACAC|CAACAACCACAAAAGACACATCATACTACATACACACCACACATACCATATATAT|ACAAAATACACACACATCATATATATA
1 p=0e+00 >chr15:55597038-55597066 -
T|GAAATACACA E=4e-02
